# Supplementary material for: Novel insights into the Leishmania infantum transcriptome diversity of protein-coding and non-coding sequences in both stages of parasite development using Nanopore direct RNA sequencing
Source: Research Square preprint supplement (doi:10.21203/rs.3.rs-6214733/v1), 2025-04-01
Supplement: Supplementary file 1 [file 013a098fc6f205261fb8cba9.xlsx]

## Sheet: LF202
PROTEIN INFORMATION				PROTEIN SIGNAL INTENSITY
Accession	Protein IDs	Protein name	Razor Unique Peptides	L. infantum Promastigote_01	L. infantum Promastigote_02	L. infantum Promastigote_03	Mean Promastigote	Intensity Promastigote rank (/5017)
ncRNA.LinJ.15.590018-587628.ORF_1	ncRNA.LinJ.15.590018-587628.ORF_1	ncRNA.LinJ.15.590018-587628.ORF_1	21	32371000	31695000	31309000	3.17917e+07	305
ncRNA.LinJ.35.673269-675508.ORF_1	ncRNA.LinJ.35.673269-675508.ORF_1	ncRNA.LinJ.35.673269-675508.ORF_1	4	5108400	4827900	4257000	4731100	1386
ncRNA.LinJ.20.239215-241929.ORF_1	ncRNA.LinJ.20.239215-241929.ORF_1	ncRNA.LinJ.20.239215-241929.ORF_1	20	3514500	3696700	3768200	3659800	1675
ncRNA.LinJ.19.354991-355730.ORF_2	ncRNA.LinJ.19.354991-355730.ORF_2;LINF_190014300-T1-p1;LINF_190014100-T1-p1;LINF_190013900-T1-p1;LINF_190014200-T1-p1;LINF_190014000-T1-p1;LINF_190013500-T1-p1;LINF_190013400-T1-p1;LINF_190013300-T1-p1;LINF_190013200-T1-p1;LINF_190013100-T1-p1;LINF_190013600-T1-p1;LINF_190013800-T1-p1;LINF_190013700-T1-p1	ATG8/AUT7/APG8/PAZ2 - putative	5	1771100	2395600	2463600	2210100	2360
ncRNA.LinJ.35.1360086-1358934.ORF_1	ncRNA.LinJ.35.1360086-1358934.ORF_1	ncRNA.LinJ.35.1360086-1358934.ORF_1	5	1838500	1997000	2070300	1968600	2565
ncRNA.LinJ.19.288698-290243.ORF_1	ncRNA.LinJ.19.288698-290243.ORF_1	ncRNA.LinJ.19.288698-290243.ORF_1	3	2078500	1805200	1663100	1.84893e+06	2663
ncRNA.LinJ.05.422834-421082.ORF_1	ncRNA.LinJ.05.422834-421082.ORF_1	ncRNA.LinJ.05.422834-421082.ORF_1	9	1349800	1823100	1512000	1.56163e+06	2927
ncRNA.LinJ.36.1432207-1430531.ORF_1	ncRNA.LinJ.36.1432207-1430531.ORF_1	ncRNA.LinJ.36.1432207-1430531.ORF_1	2	904850	1136300	923070	988073	3689
ncRNA.LinJ.26.161954-159535.ORF_1	ncRNA.LinJ.26.161954-159535.ORF_1	ncRNA.LinJ.26.161954-159535.ORF_1	5	997130	957580	978400	977703	3705
ncRNA.LinJ.36.2707985-2706764.ORF_2	ncRNA.LinJ.36.2707985-2706764.ORF_2	ncRNA.LinJ.36.2707985-2706764.ORF_2	1	827420	903040	989860	906773	3816
ncRNA.LinJ.16.660443-661654.ORF_2	ncRNA.LinJ.16.660443-661654.ORF_2	ncRNA.LinJ.16.660443-661654.ORF_2	2	673240	529610	1404400	869083	3874
ncRNA.LinJ.06.175809-177662.ORF_1	ncRNA.LinJ.06.175809-177662.ORF_1	ncRNA.LinJ.06.175809-177662.ORF_1	3	871860	728680	909100	836547	3927
ncRNA.LinJ.28.359912-362530.ORF_3	ncRNA.LinJ.28.359912-362530.ORF_3	ncRNA.LinJ.28.359912-362530.ORF_3	1	1155900	110557	1043700	770052	4052
ncRNA.LinJ.25.110081-108690.ORF_1	ncRNA.LinJ.25.110081-108690.ORF_1	ncRNA.LinJ.25.110081-108690.ORF_1	3	701260	702400	289400	564353	4384
ncRNA.LinJ.30.1344003-1344495.ORF_1	ncRNA.LinJ.30.1344003-1344495.ORF_1	ncRNA.LinJ.30.1344003-1344495.ORF_1	1	241880	307520	142190	230530	4852
ncRNA.LinJ.15.425133-423348.ORF_1	ncRNA.LinJ.15.425133-423348.ORF_1	ncRNA.LinJ.15.425133-423348.ORF_1	1	257490	169160	166900	197850	4879
ncRNA.LinJ.34.711524-709881.ORF_1	ncRNA.LinJ.34.711524-709881.ORF_1	ncRNA.LinJ.34.711524-709881.ORF_1	1	139502	110557	143172	131077	4965
LINF_170007200-T1-p1	LINF_170007200-T1-p1;LINF_170007100-T1-p1;LINF_170007000-T1-p1;LINF_170006900-T1-p1;LINF_170006800-T1-p1;LINF_170006700-T1-p1;LINF_170006600-T1-p1;LINF_170006500-T1-p1;LINF_170006400-T1-p1;LINF_170006300-T1-p1;LINF_170006200-T1-p1;LINF_170006100-T1-p1;LINF_170006000-T1-p1;LINF_170005900-T1-p1	elongation factor 1-alpha	29	2366400000	2208100000	2099200000	2.22457e+09	1
LINF_130008800-T1-p1	LINF_130008800-T1-p1;LINF_130008700-T1-p1;LINF_130008600-T1-p1;LINF_130008500-T1-p1;LINF_130008400-T1-p1;LINF_130008300-T1-p1;LINF_130008200-T1-p1;LINF_130008100-T1-p1;LINF_130008000-T1-p1;LINF_130007900-T1-p1;LINF_130007800-T1-p1;LINF_130007700-T1-p1	alpha tubulin	31	2221100000	2181300000	2158000000	2186800000	2
LINF_330015200-T1-p1	LINF_330015200-T1-p1;LINF_330015100-T1-p1;LINF_330015000-T1-p1	beta tubulin	32	2268700000	2152200000	2071700000	2164200000	3
LINF_250014900-T1-p1	LINF_250014900-T1-p1	cyclophilin type peptidyl-prolyl cis-trans isomerase	10	1921600000	1891400000	1992600000	1935200000	4
LINF_150019000-T1-p1	LINF_150019000-T1-p1	tryparedoxin peroxidase	13	1013500000	1179000000	999670000	1.06406e+09	5
LINF_300035200-T1-p1	LINF_300035200-T1-p1;LINF_300035100-T1-p1;LINF_300035000-T1-p1	glyceraldehyde 3-phosphate dehydrogenase - glycosomal	19	1059700000	1070100000	1025500000	1.05177e+09	6
LINF_320036800-T1-p1	LINF_320036800-T1-p1;LINF_320036700-T1-p1	nucleoside diphosphate kinase b	10	951110000	1055400000	955570000	987360000	7
LINF_260011400-T1-p1	LINF_260011400-T1-p1;LINF_260011200-T1-p1	10 kDa heat shock protein - putative	7	956870000	924000000	787900000	889590000	8
LINF_330015500-T1-p1	LINF_330015500-T1-p1;LINF_330015400-T1-p1;LINF_330015300-T1-p1	beta tubulin	1	704130000	784570000	653470000	7.14057e+08	9
LINF_330010000-T1-p1	LINF_330010000-T1-p1;LINF_330009900-T1-p1;LINF_330009800-T1-p1;LINF_330009500-T1-p1;LINF_330009400-T1-p1;LINF_330009300-T1-p1;LINF_330009200-T1-p1;LINF_330009100-T1-p1;LINF_330009000-T1-p1;LINF_330009600-T1-p1;LINF_330009700-T1-p1	heat shock protein 83-17	52	675050000	700500000	634890000	6.70147e+08	10
LINF_230014600-T1-p1	LINF_230014600-T1-p1	3-ketoacyl-CoA thiolase - putative	28	533220000	577680000	591820000	5.67573e+08	11
LINF_280036000-T1-p1	LINF_280036000-T1-p1;LINF_280035900-T1-p1;LINF_280035500-T1-p1;LINF_280035400-T1-p1;LINF_280035300-T1-p1;LINF_280035200-T1-p1;LINF_280035100-T1-p1;LINF_280035000-T1-p1;LINF_280035800-T1-p1;LINF_280035700-T1-p1;LINF_280035600-T1-p1	hsp70	39	540710000	533460000	502140000	5.25437e+08	12
LINF_190005300-T1-p1	LINF_190005300-T1-p1;LINF_190005200-T1-p1;LINF_090020900-T1-p1	histone H2B	6	499940000	549200000	502020000	5.17053e+08	13
LINF_290017500-T1-p1	LINF_290017500-T1-p1	tryparedoxin 1 - putative	10	497150000	495870000	461670000	4.84897e+08	14
LINF_050008800-T1-p1	LINF_050008800-T1-p1	microtubule-associated protein - putative	28	433640000	445530000	402770000	4.27313e+08	15
LINF_140018000-T1-p1	LINF_140018000-T1-p1	enolase	25	422570000	458450000	372850000	4.17957e+08	16
LINF_190006900-T1-p1	LINF_190006900-T1-p1;LINF_190006800-T1-p1	ADP- ATP carrier protein 1 - mitochondrial precursor - putative	17	393010000	406780000	402910000	400900000	17
LINF_050010200-T1-p1	LINF_050010200-T1-p1;LINF_050010100-T1-p1;LINF_050010000-T1-p1	ATP synthase F1 - alpha subunit - putative	27	391010000	403980000	382050000	3.92347e+08	18
LINF_350027500-T1-p1	LINF_350027500-T1-p1;LINF_350027400-T1-p1;LINF_350027300-T1-p1	kinetoplastid membrane protein-11	7	306350000	380750000	321480000	3.36193e+08	19
LINF_260017400-T1-p1	LINF_260017400-T1-p1	heat shock 70-related protein 1 - mitochondrial precursor - putative	32	335740000	325570000	306210000	3.22507e+08	20
LINF_250013100-T1-p1	LINF_250013100-T1-p1;LINF_250013000-T1-p1;LINF_250012900-T1-p1	eukaryotic initiation factor 5a - putative	8	308110000	331950000	315490000	3.18517e+08	21
LINF_100017000-T1-p1	LINF_100017000-T1-p1;LINF_100016800-T1-p1;LINF_100015400-T1-p1;LINF_160011400-T1-p1;LINF_160011300-T1-p1;LINF_160011000-T1-p1;LINF_160010900-T1-p1	histone H3 - putative	4	310060000	348940000	249040000	302680000	22
LINF_130010600-T1-p1	LINF_130010600-T1-p1	40S ribosomal protein S12 - putative	7	339540000	375650000	174690000	2.96627e+08	23
LINF_300030200-T1-p1	LINF_300030200-T1-p1	heat shock 70-related protein 1 - mitochondrial precursor - putative	35	302300000	297440000	283610000	294450000	24
LINF_360015200-T1-p1	LINF_360015200-T1-p1;LINF_360015100-T1-p1	40S ribosomal protein S18 - putative	10	292150000	297160000	281240000	2.90183e+08	25
LINF_270025000-T1-p1	LINF_270025000-T1-p1;LINF_270024900-T1-p1	glycosomal phosphoenolpyruvate carboxykinase - putative	34	274590000	274400000	284070000	2.77687e+08	26
LINF_320009100-T1-p1	LINF_320009100-T1-p1	ATP-dependent RNA helicase - putative	36	276210000	276090000	259610000	2.70637e+08	27
LINF_350042400-T1-p1	LINF_350042400-T1-p1	Gim5A protein - putative	16	259640000	261270000	264720000	2.61877e+08	28
LINF_030009000-T1-p1	LINF_030009000-T1-p1;LINF_030009100-T1-p1	60s Acidic ribosomal protein - putative	5	263300000	279360000	232030000	258230000	29
LINF_350050500-T1-p1	LINF_350050500-T1-p1	CS domain containing protein - putative	9	235030000	254190000	279340000	2.56187e+08	30
LINF_360048000-T1-p1	LINF_360048000-T1-p1	S-adenosylhomocysteine hydrolase	26	255360000	262710000	250120000	2.56063e+08	31
LINF_360005100-T1-p1	LINF_360005100-T1-p1;LINF_350005100-T1-p1;LINF_310040900-T1-p1;LINF_250031800-T1-p1;LINF_210005100-T1-p1;LINF_020005100-T1-p1;LINF_150005000-T1-p1	histone H4	9	232390000	276560000	250560000	253170000	32
LINF_350043200-T1-p1	LINF_350043200-T1-p1;LINF_350043000-T1-p1	60S ribosomal protein L27A/L29 - putative	8	215900000	251630000	223490000	230340000	33
LINF_310029700-T1-p1	LINF_310029700-T1-p1	prostaglandin f2-alpha synthase/D-arabinose dehydrogenase	18	228060000	213860000	235920000	2.25947e+08	34
LINF_290016800-T1-p1	LINF_290016800-T1-p1;LINF_290016700-T1-p1;LINF_290016600-T1-p1	ribosomal protein L1a - putative	23	221770000	233590000	221890000	225750000	35
LINF_210016900-T1-p1	LINF_210016900-T1-p1;LINF_210016800-T1-p1;LINF_210016700-T1-p1	histone H2A - putative	3	197030000	252390000	177730000	209050000	36
LINF_280015900-T1-p1	LINF_280015900-T1-p1;LINF_280015700-T1-p1	ribosomal protein S20 - putative	6	204960000	214220000	197360000	2.05513e+08	37
LINF_360046500-T1-p1	LINF_360046500-T1-p1;LINF_180011500-T1-p1	60S ribosomal protein L10a - putative	21	188980000	198020000	198580000	1.95193e+08	38
LINF_250018000-T1-p1	LINF_250018000-T1-p1;LINF_250017900-T1-p1	ATP synthase subunit beta - mitochondrial - putative	23	198430000	184060000	190340000	1.90943e+08	39
LINF_040017600-T1-p1	LINF_040017600-T1-p1	actin	21	188920000	186950000	182130000	186000000	40
LINF_340014200-T1-p1	LINF_340014200-T1-p1;LINF_340014000-T1-p1	elongation factor 1-beta	7	182280000	199080000	172250000	1.84537e+08	41
LINF_070010600-T1-p1	LINF_070010600-T1-p1;LINF_070010500-T1-p1	60S ribosomal protein L7a - putative	12	183120000	167010000	191200000	1.80443e+08	42
LINF_360007100-T1-p1	LINF_360007100-T1-p1;LINF_360007000-T1-p1;LINF_360006900-T1-p1;LINF_360006800-T1-p1	elongation factor 2	47	178280000	174880000	179970000	177710000	43
LINF_360046400-T1-p1	LINF_360046400-T1-p1;LINF_180011200-T1-p1	40S ribosomal protein S27-1 - putative	5	162850000	167010000	189060000	1.72973e+08	44
LINF_300039100-T1-p1	LINF_300039100-T1-p1;LINF_210018100-T1-p1	60S ribosomal protein L9 - putative	10	166030000	179850000	171440000	172440000	45
LINF_310018700-T1-p1	LINF_310018700-T1-p1	Pyrophosphate-energized vacuolar membrane proton pump 1 - putative	24	168470000	170460000	167010000	1.68647e+08	46
LINF_010012900-T1-p1	LINF_010012900-T1-p1;LINF_010012800-T1-p1	eukaryotic initiation factor 4a - putative	23	168070000	166590000	164480000	166380000	47
LINF_310028300-T1-p1	LINF_310028300-T1-p1;LINF_310026800-T1-p1;LINF_090015200-T1-p1;LINF_360043900-T1-p1	ubiquitin-fusion protein	5	150450000	183050000	156080000	1.63193e+08	48
LINF_340035700-T1-p1	LINF_340035700-T1-p1;LINF_340035600-T1-p1;LINF_320038800-T1-p1	ribosomal protein L3 - putative	22	158120000	161840000	162250000	1.60737e+08	49
LINF_240027300-T1-p1	LINF_240027300-T1-p1	3-hydroxy-3-methylglutaryl-CoA synthase - putative	32	159970000	154560000	161990000	158840000	50
LINF_360027100-T1-p1	LINF_360027100-T1-p1	chaperonin HSP60 - mitochondrial precursor	29	157280000	166020000	147120000	1.56807e+08	51
LINF_320024100-T1-p1	LINF_320024100-T1-p1	iron superoxide dismutase - putative	9	156040000	142750000	169790000	1.56193e+08	52
LINF_150019600-T1-p1	LINF_150019600-T1-p1;LINF_150019500-T1-p1	60S acidic ribosomal protein P2	6	157750000	164640000	138960000	1.53783e+08	53
LINF_260013100-T1-p1	LINF_260013100-T1-p1	type II (glutathione peroxidase-like) tryparedoxin peroxidase	15	147160000	158930000	153620000	1.53237e+08	54
LINF_360036700-T1-p1	LINF_360036700-T1-p1;LINF_360036600-T1-p1	40S ribosomal protein S24e	5	153460000	153310000	149340000	1.52037e+08	55
LINF_330039600-T1-p1	LINF_330039600-T1-p1	hypothetical protein - conserved	3	104380000	172610000	172000000	1.49663e+08	56
LINF_260031700-T1-p1	LINF_260031700-T1-p1	Paraquat-inducible protein A - putative	3	169170000	123200000	154200000	1.48857e+08	57
LINF_210018300-T1-p1	LINF_210018300-T1-p1;LINF_210018200-T1-p1	40S ribosomal protein S23 - putative	4	139130000	151440000	151640000	1.47403e+08	58
LINF_340031800-T1-p1	LINF_340031800-T1-p1	Alba - putative	14	158050000	143310000	136040000	145800000	59
LINF_280034800-T1-p1	LINF_280034800-T1-p1;LINF_280034700-T1-p1	receptor for activated C kinase 1	19	139820000	143520000	152990000	1.45443e+08	60
LINF_290032400-T1-p1	LINF_290032400-T1-p1;LINF_290032300-T1-p1	60S ribosomal protein L13 - putative	13	136920000	151750000	130500000	1.39723e+08	61
LINF_050008500-T1-p1	LINF_050008500-T1-p1	trypanothione reductase	30	137730000	131610000	137160000	135500000	62
LINF_330014100-T1-p1	LINF_330014100-T1-p1;LINF_150018200-T1-p1	60S ribosomal protein L6 - putative	12	133890000	139520000	130720000	134710000	63
LINF_350005400-T1-p1	LINF_350005400-T1-p1;LINF_350005300-T1-p1;LINF_350005200-T1-p1	pyruvate kinase	29	127490000	141350000	130940000	133260000	64
LINF_130005800-T1-p1	LINF_130005800-T1-p1	carboxypeptidase - putative	29	130460000	130440000	128280000	1.29727e+08	65
LINF_350010700-T1-p1	LINF_350010700-T1-p1;LINF_320014400-T1-p1	60S ribosomal protein L18a - putative	7	118600000	131970000	129380000	126650000	66
LINF_320013000-T1-p1	LINF_320013000-T1-p1	RNA binding protein - putative	15	122950000	135590000	118340000	1.25627e+08	67
LINF_350025100-T1-p1	LINF_350025100-T1-p1;LINF_210027600-T1-p1	40S ribosomal protein S6 - putative	15	123590000	130380000	122840000	1.25603e+08	68
LINF_250027000-T1-p1	LINF_250027000-T1-p1	2 -4-dihydroxyhept-2-ene-1 -7-dioic acid aldolase - putative	12	124920000	117070000	131010000	1.24333e+08	69
LINF_300043100-T1-p1	LINF_300043100-T1-p1;LINF_300043000-T1-p1	60S acidic ribosomal protein P2 - putative	5	127410000	121330000	119100000	1.22613e+08	70
LINF_040010500-T1-p1	LINF_040010500-T1-p1	Tetratricopeptide repeat/TPR repeat - putative	32	119460000	116360000	130660000	122160000	71
LINF_360027200-T1-p1	LINF_360027200-T1-p1	chaperonin HSP60 - mitochondrial precursor	20	128400000	125020000	109180000	1.20867e+08	72
LINF_340009500-T1-p1	LINF_340009500-T1-p1;LINF_250018100-T1-p1	ribosomal protein S25	6	119740000	133810000	107440000	120330000	73
LINF_140014500-T1-p1	LINF_140014500-T1-p1;LINF_140014400-T1-p1	calpain-like cysteine peptidase - putative	8	131610000	124940000	102790000	119780000	74
LINF_250010200-T1-p1	LINF_250010200-T1-p1	RNA-binding protein - putative - UPB1	5	128870000	126720000	103610000	1.19733e+08	75
LINF_130017300-T1-p1	LINF_130017300-T1-p1;LINF_130017200-T1-p1	40S ribosomal protein S4 - putative	16	119840000	122610000	116000000	1.19483e+08	76
LINF_290013400-T1-p1	LINF_290013400-T1-p1	CPC cysteine peptidase - Clan CA - family C1 - Cathepsin B-like	13	112190000	121110000	124990000	119430000	77
LINF_210024100-T1-p1	LINF_210024100-T1-p1;LINF_200021000-T1-p1	40S ribosomal protein S11 - putative	8	108810000	128160000	113250000	116740000	78
LINF_180019100-T1-p1	LINF_180019100-T1-p1	heat shock protein 110 - putative	44	115420000	115640000	117140000	1.16067e+08	79
LINF_360046600-T1-p1	LINF_360046600-T1-p1	transcription factor btf3 - putative	7	116880000	119390000	109930000	115400000	80
LINF_360078300-T1-p1	LINF_360078300-T1-p1	2 -3-bisphosphoglycerate-independent phosphoglycerate mutase	27	117420000	108220000	106850000	110830000	81
LINF_340022400-T1-p1	LINF_340022400-T1-p1;LINF_340022500-T1-p1	p25-alpha - putative	10	107080000	112140000	111300000	1.10173e+08	82
LINF_290011200-T1-p1	LINF_290011200-T1-p1	ATP-binding cassette subfamily A - member 1 - putative	47	111060000	109130000	109850000	1.10013e+08	83
LINF_300041700-T1-p1	LINF_300041700-T1-p1	40S ribosomal protein S14	10	105470000	114820000	103960000	1.08083e+08	84
LINF_360018400-T1-p1	LINF_360018400-T1-p1	fructose-1 -6-bisphosphate aldolase	21	102930000	112030000	109210000	1.08057e+08	85
LINF_260006700-T1-p1	LINF_260006700-T1-p1;LINF_260006600-T1-p1	60S ribosomal protein L7 - putative	15	100960000	110280000	111940000	1.07727e+08	86
LINF_170012700-T1-p1	LINF_170012700-T1-p1;LINF_170012500-T1-p1	Acyl CoA binding protein - putative	6	106770000	110050000	105290000	107370000	87
LINF_340033900-T1-p1	LINF_340033900-T1-p1	40S ribosomal protein S19 protein - putative	10	103480000	112470000	104930000	106960000	88
LINF_230005400-T1-p1	LINF_230005400-T1-p1	peroxidoxin	14	100230000	110770000	107180000	106060000	89
LINF_240013700-T1-p1	LINF_240013700-T1-p1	triosephosphate isomerase	13	98662000	101980000	106670000	1.02437e+08	90
LINF_220005300-T1-p1	LINF_220005300-T1-p1;LINF_040009700-T1-p1	60S ribosomal protein L11 (L5 - L16)	9	92208000	96425000	109400000	9.93443e+07	91
LINF_360042500-T1-p1	LINF_360042500-T1-p1	ribosomal protein L29 - putative	3	97955000	109710000	87191000	9.82853e+07	92
LINF_080017700-T1-p1	LINF_080017700-T1-p1	beta tubulin	2	102280000	105980000	86322000	98194000	93
LINF_090021300-T1-p1	LINF_090021300-T1-p1	hypothetical protein - conserved	3	91069000	99012000	104480000	98187000	94
LINF_200018300-T1-p1	LINF_200018300-T1-p1	small myristoylated protein-1	4	105380000	110570000	76674000	9.75413e+07	95
LINF_340006400-T1-p1	LINF_340006400-T1-p1	malate dehydrogenase	18	97203000	97370000	96471000	9.70147e+07	96
LINF_350037700-T1-p1	LINF_350037700-T1-p1	cystathione gamma lyase - putative	16	95803000	93899000	100100000	9.66007e+07	97
LINF_320040600-T1-p1	LINF_320040600-T1-p1	dihydrolipoamide dehydrogenase - putative	24	95775000	99634000	90015000	9.51413e+07	98
LINF_360016800-T1-p1	LINF_360016800-T1-p1;LINF_360016500-T1-p1	ribosomal protein L24 - putative	7	90405000	95055000	90270000	91910000	99
LINF_330035400-T1-p1	LINF_330035400-T1-p1	metallo-peptidase - Clan ME - Family M16	15	86599000	95917000	93008000	9.18413e+07	100
LINF_350009300-T1-p1	LINF_350009300-T1-p1;LINF_350009200-T1-p1	40S ribosomal protein S3A - putative	13	93991000	96123000	85000000	9.17047e+07	101
LINF_330016500-T1-p1	LINF_330016500-T1-p1;LINF_150017600-T1-p1	40S ribosomal protein S3 - putative	10	94001000	88659000	88215000	9.02917e+07	102
LINF_360020500-T1-p1	LINF_360020500-T1-p1	translation elongation factor 1-beta - putative	12	98155000	94943000	77565000	90221000	103
LINF_250023800-T1-p1	LINF_250023800-T1-p1	pyruvate dehydrogenase E1 beta subunit - putative	17	94527000	90271000	80946000	8.85813e+07	104
LINF_350019500-T1-p1	LINF_350019500-T1-p1;LINF_350019400-T1-p1;LINF_350019300-T1-p1;LINF_350019200-T1-p1;LINF_320046200-T1-p1	60S ribosomal protein L2 - putative	9	80579000	89877000	93418000	87958000	105
LINF_270019000-T1-p1	LINF_270019000-T1-p1	T-complex protein 1 - beta subunit - putative	27	84926000	91520000	85396000	8.72807e+07	106
LINF_100011100-T1-p1	LINF_100011100-T1-p1;LINF_100011000-T1-p1;LINF_100010900-T1-p1;LINF_100010800-T1-p1;LINF_100010700-T1-p1;LINF_100010600-T1-p1;LINF_100010300-T1-p1;LINF_100010200-T1-p1;LINF_100011300-T1-p1;LINF_100010400-T1-p1;LINF_100010500-T1-p1	GP63 - leishmanolysin	17	90404000	86170000	84173000	8.69157e+07	107
LINF_280032900-T1-p1	LINF_280032900-T1-p1;LINF_280032800-T1-p1	40S ribosomal protein S17 - putative	11	82349000	88511000	89126000	86662000	108
LINF_080007900-T1-p1	LINF_080007900-T1-p1	iron superoxide dismutase	12	87362000	82366000	89470000	8.63993e+07	109
LINF_350007500-T1-p1	LINF_350007500-T1-p1	60S ribosomal protein L30	6	85757000	92539000	79590000	85962000	110
LINF_100015200-T1-p1	LINF_100015200-T1-p1	nuclear transport factor 2 - putative	6	85879000	79025000	91271000	8.53917e+07	111
LINF_340014400-T1-p1	LINF_340014400-T1-p1;LINF_150007100-T1-p1	60S ribosomal protein L13a - putative	8	81700000	90384000	83449000	8.51777e+07	112
LINF_340044000-T1-p1	LINF_340044000-T1-p1	60S ribosomal protein L21 - putative	10	82229000	92002000	80536000	8.49223e+07	113
LINF_220010100-T1-p1	LINF_220010100-T1-p1;LINF_220009800-T1-p1	40S ribosomal protein S15 - putative	6	77542000	86110000	88202000	8.39513e+07	114
LINF_040014500-T1-p1	LINF_040014500-T1-p1;LINF_040012600-T1-p1	60S ribosomal protein L10 - putative	12	80983000	87180000	81373000	8.31787e+07	115
LINF_260024900-T1-p1	LINF_260024900-T1-p1	hypothetical protein - conserved	40	82184000	83085000	81076000	82115000	116
LINF_090016000-T1-p1	LINF_090016000-T1-p1;LINF_090016050-T1-p1	elongation factor-1 gamma	15	82733000	83911000	79111000	8.19183e+07	117
LINF_350043400-T1-p1	LINF_350043400-T1-p1;LINF_350043300-T1-p1	60S ribosomal protein L23 - putative	6	80334000	91319000	73384000	81679000	118
LINF_160013000-T1-p1	LINF_160013000-T1-p1	transaldolase - putative	18	82141000	81895000	80697000	8.15777e+07	119
LINF_180010100-T1-p1	LINF_180010100-T1-p1	aconitase - putative	36	84907000	80032000	78318000	8.10857e+07	120
LINF_240026800-T1-p1	LINF_240026800-T1-p1	transketolase	30	77546000	81820000	82833000	80733000	121
LINF_360037500-T1-p1	LINF_360037500-T1-p1	succinyl-CoA ligase [GDP-forming] beta-chain - putative	16	77673000	81382000	81415000	8.01567e+07	122
LINF_350023900-T1-p1	LINF_350023900-T1-p1;LINF_350023800-T1-p1;LINF_350023700-T1-p1	60S ribosomal protein L5 - putative	12	84890000	78537000	76903000	80110000	123
LINF_360081500-T1-p1	LINF_360081500-T1-p1	protein disulfide isomerase 2	29	82395000	80053000	77850000	8.00993e+07	124
LINF_100008300-T1-p1	LINF_100008300-T1-p1	isocitrate dehydrogenase [NADP] - mitochondrial precursor - putative	30	79600000	85177000	74857000	79878000	125
LINF_300019400-T1-p1	LINF_300019400-T1-p1	amidohydrolase - putative	20	80346000	79637000	78211000	79398000	126
LINF_120010600-T1-p1	LINF_120010600-T1-p1;CON__Q3ZBD7	glucose-6-phosphate isomerase	31	76621000	79347000	81257000	79075000	127
LINF_110017500-T1-p1	LINF_110017500-T1-p1;LINF_110017300-T1-p1	60S ribosomal protein L28 - putative	6	69206000	80917000	84551000	7.82247e+07	128
LINF_280031300-T1-p1	LINF_280031300-T1-p1	2-oxoglutarate dehydrogenase - E2 component - dihydrolipoamide succinyltransferase - putative	16	80360000	76987000	76867000	7.80713e+07	129
LINF_350027200-T1-p1	LINF_350027200-T1-p1	RNA-binding protein - putative	16	75216000	78969000	79041000	77742000	130
LINF_220021800-T1-p1	LINF_220021800-T1-p1;LINF_220021400-T1-p1	60S ribosomal protein L14 - putative	5	76981000	75566000	80594000	7.77137e+07	131
LINF_270010000-T1-p1	LINF_270010000-T1-p1	calpain-like cysteine peptidase - putative	24	78636000	76817000	76185000	7.72127e+07	132
LINF_310036600-T1-p1	LINF_310036600-T1-p1	ADP-ribosylation factor - putative	12	76618000	81494000	71355000	76489000	133
LINF_290010100-T1-p1	LINF_290010100-T1-p1	ADF/Cofilin	16	73579000	78232000	77447000	7.64193e+07	134
LINF_110008400-T1-p1	LINF_110008400-T1-p1	14-3-3 protein 2 - putative	11	75809000	77569000	74400000	75926000	135
LINF_060018900-T1-p1	LINF_060018900-T1-p1	coproporphyrinogen III oxidase	21	71871000	79377000	76281000	75843000	136
LINF_240027000-T1-p1	LINF_240027000-T1-p1;LINF_240026900-T1-p1	40S ribosomal protein S8 - putative	10	71352000	78511000	76291000	7.53847e+07	137
LINF_040007500-T1-p1	LINF_040007500-T1-p1	GRAM domain containing protein - putative	13	71386000	81114000	73521000	7.53403e+07	138
LINF_240020600-T1-p1	LINF_240020600-T1-p1;LINF_240020500-T1-p1	translationally controlled tumor protein (TCTP) - putative	9	80368000	77668000	67910000	7.53153e+07	139
LINF_280016800-T1-p1	LINF_280016800-T1-p1	WD domain - G-beta repeat - putative	22	71071000	75615000	76953000	7.45463e+07	140
LINF_350017900-T1-p1	LINF_350017900-T1-p1	ubiquitin-conjugating enzyme E2 - putative	5	92398000	63519000	67534000	7.44837e+07	141
LINF_360015700-T1-p1	LINF_360015700-T1-p1;LINF_360015600-T1-p1	40S ribosomal protein S10 - putative	9	71282000	75201000	75655000	74046000	142
LINF_030006800-T1-p1	LINF_030006800-T1-p1	delta-1-pyrroline-5-carboxylate dehydrogenase - putative	25	72626000	75555000	72458000	7.35463e+07	143
LINF_300041800-T1-p1	LINF_300041800-T1-p1	ATP synthase - epsilon chain - putative	7	70862000	80865000	68845000	73524000	144
LINF_300041000-T1-p1	LINF_300041000-T1-p1;LINF_300040800-T1-p1	S-adenosylmethionine synthetase	29	79035000	71285000	69884000	7.34013e+07	145
LINF_270032200-T1-p1	LINF_270032200-T1-p1	heat shock protein DNAJ - putative	21	78436000	75644000	64975000	7.30183e+07	146
LINF_200013000-T1-p1	LINF_200013000-T1-p1	vesicular-fusion protein nsf - putative	35	73575000	71209000	73364000	72716000	147
LINF_360025800-T1-p1	LINF_360025800-T1-p1;LINF_210028000-T1-p1	60S ribosomal protein L37a	2	76585000	65115000	73452000	7.17173e+07	148
LINF_350054100-T1-p1	LINF_350054100-T1-p1	proteasome alpha 1 subunit - putative	13	69606000	69912000	69745000	6.97543e+07	149
LINF_090015600-T1-p1	LINF_090015600-T1-p1;LINF_090015500-T1-p1;LINF_090015400-T1-p1	calmodulin - putative	10	82764000	85631000	39937000	69444000	150
LINF_150018300-T1-p1	LINF_150018300-T1-p1	glutamate dehydrogenase	54	68696000	70524000	68809000	69343000	151
LINF_250024400-T1-p1	LINF_250024400-T1-p1	enoyl-CoA reductase - putative	14	65407000	68553000	72393000	6.87843e+07	152
LINF_260013800-T1-p1	LINF_260013800-T1-p1;LINF_260013700-T1-p1	40S ribosomal protein S16 - putative	5	66434000	68900000	68543000	67959000	153
LINF_060005000-T1-p1	LINF_060005000-T1-p1	histone H4	4	62860000	73364000	67246000	6.78233e+07	154
LINF_250028400-T1-p1	LINF_250028400-T1-p1;LINF_250028300-T1-p1	succinyl-CoA synthetase alpha subunit - putative	11	69752000	69449000	63854000	67685000	155
LINF_360030600-T1-p1	LINF_360030600-T1-p1	glyceraldehyde 3-phosphate dehydrogenase, cytosolic	10	68203000	65520000	69303000	6.76753e+07	156
LINF_290032900-T1-p1	LINF_290032900-T1-p1	ATP-dependent phosphofructokinase	31	64235000	68989000	67526000	6.69167e+07	157
LINF_350038800-T1-p1	LINF_350038800-T1-p1	6-phosphogluconate dehydrogenase - decarboxylating - putative	17	63435000	68430000	67507000	6.64573e+07	158
LINF_300037600-T1-p1	LINF_300037600-T1-p1;LINF_280010400-T1-p1	ribosomal protein S26 - putative	6	61527000	64786000	72264000	6.61923e+07	159
LINF_180021400-T1-p1	LINF_180021400-T1-p1	nonspecific nucleoside hydrolase	7	64266000	64057000	70238000	66187000	160
LINF_280017800-T1-p1	LINF_280017800-T1-p1	heat shock 70-related protein 1 - mitochondrial precursor - putative	33	67532000	68056000	60642000	65410000	161
LINF_350014500-T1-p1	LINF_350014500-T1-p1	aldose 1-epimerase - putative	15	61336000	65991000	67553000	64960000	162
LINF_250020400-T1-p1	LINF_250020400-T1-p1	GTP-binding protein - putative	11	62810000	68998000	61895000	6.45677e+07	163
LINF_290024100-T1-p1	LINF_290024100-T1-p1;LINF_290024000-T1-p1;LINF_290023900-T1-p1	histone H2A - putative	1	74662000	82808000	35846000	6.44387e+07	164
LINF_320037600-T1-p1	LINF_320037600-T1-p1	leucine-rich repeat protein - putative	26	64628000	64714000	62892000	64078000	165
LINF_190005400-T1-p1	LINF_190005400-T1-p1	40S ribosomal protein S2	14	66881000	64001000	60974000	63952000	166
LINF_200006200-T1-p1	LINF_200006200-T1-p1	NADH-ubiquinone oxidoreductase complex I subunit - putative	4	67086000	69751000	53183000	63340000	167
LINF_150009200-T1-p1	LINF_150009200-T1-p1;LINF_150009100-T1-p1	60S acidic ribosomal protein - putative	5	62576000	57897000	68675000	6.30493e+07	168
LINF_230007100-T1-p1	LINF_230007100-T1-p1	endoribonuclease L-PSP (pb5) - putative	7	62038000	63155000	62233000	6.24753e+07	169
LINF_360040400-T1-p1	LINF_360040400-T1-p1	14-3-3 protein 1 - putative	14	63577000	62399000	57368000	6.11147e+07	170
LINF_010009300-T1-p1	LINF_010009300-T1-p1;LINF_010009200-T1-p1	ribosomal protein S7 - putative	12	59356000	62880000	60876000	6.10373e+07	171
LINF_360060700-T1-p1	LINF_360060700-T1-p1;LINF_360059600-T1-p1	40S ribosomal protein SA - putative	14	60933000	60017000	60919000	60623000	172
LINF_360068400-T1-p1	LINF_360068400-T1-p1	flagellum targeting protein kharon1 - putative	20	61349000	64914000	52801000	59688000	173
LINF_210007900-T1-p1	LINF_210007900-T1-p1;LINF_210007800-T1-p1	hexokinase - putative	28	55304000	62679000	60909000	5.96307e+07	174
LINF_360026300-T1-p1	LINF_360026300-T1-p1	phosphomannomutase - putative	16	58673000	53080000	66844000	5.95323e+07	175
LINF_360047300-T1-p1	LINF_360047300-T1-p1	glycyl tRNA synthetase - putative	28	57784000	57663000	61882000	5.91097e+07	176
LINF_270020600-T1-p1	LINF_270020600-T1-p1;LINF_270020500-T1-p1	60S acidic ribosomal protein P0 - putative	11	60188000	59455000	57272000	5.89717e+07	177
LINF_270013800-T1-p1	LINF_270013800-T1-p1	ras-related protein RAB1A - putative	10	61815000	57799000	56306000	58640000	178
LINF_350017000-T1-p1	LINF_350017000-T1-p1	short chain dehydrogenase - putative	15	57968000	56556000	58276000	57600000	179
LINF_300012500-T1-p1	LINF_300012500-T1-p1	co-chaperone GrpE - putative	9	57199000	63076000	52008000	5.74277e+07	180
LINF_040012800-T1-p1	LINF_040012800-T1-p1	nascent polypeptide associated complex subunit- like protein - copy 2	8	58849000	57782000	55370000	5.73337e+07	181
LINF_330041600-T1-p1	LINF_330041600-T1-p1;LINF_190008800-T1-p1	40S ribosomal protein S13 - putative	9	56087000	57248000	58317000	5.72173e+07	182
LINF_250017300-T1-p1	LINF_250017300-T1-p1	aldehyde dehydrogenase - mitochondrial precursor	16	58794000	56732000	56111000	5.72123e+07	183
LINF_350012100-T1-p1	LINF_350012100-T1-p1	proteasome activator protein pa26 - putative	10	60964000	51804000	58463000	57077000	184
LINF_180019200-T1-p1	LINF_180019200-T1-p1	pyruvate dehydrogenase E1 component alpha subunit - putative	15	58947000	58074000	53520000	56847000	185
LINF_320034100-T1-p1	LINF_320034100-T1-p1;LINF_320033900-T1-p1	ribosomal protein L27 - putative	4	58489000	54605000	56976000	56690000	186
LINF_360018300-T1-p1	LINF_360018300-T1-p1;LINF_070012400-T1-p1	40S ribosomal protein S9 - putative	10	53527000	56118000	59221000	5.62887e+07	187
LINF_220013200-T1-p1	LINF_220013200-T1-p1	hypothetical protein - conserved	19	57581000	57565000	52851000	55999000	188
LINF_300023700-T1-p1	LINF_300023700-T1-p1	ATPase family associated with various cellular activities (AAA)/AAA domain containing protein - putative	3	54303000	51380000	59446000	55043000	189
LINF_230014800-T1-p1	LINF_230014800-T1-p1	acetyl-CoA synthetase - putative	32	56284000	54875000	53667000	54942000	190
LINF_360079400-T1-p1	LINF_360079400-T1-p1	ATP synthase delta (OSCP) subunit - putative	14	51688000	55928000	55624000	5.44133e+07	191
LINF_360034400-T1-p1	LINF_360034400-T1-p1	dihydrolipoamide acetyltransferase precursor - putative	15	55511000	56499000	51104000	5.43713e+07	192
LINF_150008200-T1-p1	LINF_150008200-T1-p1	ribonucleoprotein p18 - mitochondrial precursor - putative	14	52943000	56569000	52477000	5.39963e+07	193
LINF_350024000-T1-p1	LINF_350024000-T1-p1	ribosomal protein L15 - putative	5	54503000	50049000	54778000	53110000	194
LINF_130015600-T1-p1	LINF_130015600-T1-p1	NADH-cytochrome b5 reductase - putative	19	50929000	54182000	53459000	5.28567e+07	195
LINF_350019900-T1-p1	LINF_350019900-T1-p1	arginase	14	49762000	55224000	52530000	5.25053e+07	196
LINF_300014400-T1-p1	LINF_300014400-T1-p1	adenosine kinase - putative	14	51670000	53396000	52166000	5.24107e+07	197
LINF_300032400-T1-p1	LINF_300032400-T1-p1	GRAM domain containing protein - putative	4	52746000	46029000	58238000	5.23377e+07	198
LINF_290036400-T1-p1	LINF_290036400-T1-p1	40S ribosomal protein S19-like protein	1	54595000	55916000	46364000	5.22917e+07	199
LINF_320024000-T1-p1	LINF_320024000-T1-p1	iron superoxide dismutase - putative	2	56898000	49228000	50382000	5.21693e+07	200
LINF_230021100-T1-p1	LINF_230021100-T1-p1	T-complex protein 1 - gamma subunit - putative	32	49377000	53008000	53345000	51910000	201
LINF_160010700-T1-p1	LINF_160010700-T1-p1	orotidine-5-phosphate decarboxylase/orotate phosphoribosyltransferase - putative	24	51917000	52073000	51167000	51719000	202
LINF_060009600-T1-p1	LINF_060009600-T1-p1;LINF_060009400-T1-p1	60S ribosomal protein L19 - putative	5	47501000	55690000	51329000	5.15067e+07	203
LINF_080017300-T1-p1	LINF_080017300-T1-p1	hypothetical protein - conserved	6	51552000	48935000	52497000	5.09947e+07	204
LINF_260006300-T1-p1	LINF_260006300-T1-p1	adenine phosphoribosyltransferase	6	49096000	52902000	49191000	5.03963e+07	205
LINF_130009400-T1-p1	LINF_130009400-T1-p1	Alba - putative	7	46437000	50879000	53659000	50325000	206
LINF_070014900-T1-p1	LINF_070014900-T1-p1	splicing factor ptsr1-like protein	14	47280000	51485000	51178000	49981000	207
LINF_050005900-T1-p1	LINF_050005900-T1-p1	phosphoprotein phosphatase - putative	26	47514000	49454000	52239000	4.97357e+07	208
LINF_350050100-T1-p1	LINF_350050100-T1-p1	mitochondrial phosphate transporter - putative	15	44592000	52151000	49356000	4.86997e+07	209
LINF_260027600-T1-p1	LINF_260027600-T1-p1;LINF_030007300-T1-p1	ribosomal protein L38 - putative	4	46267000	49377000	50274000	4.86393e+07	210
LINF_180005200-T1-p1	LINF_180005200-T1-p1	Ontology term:GO:0005524	20	46540000	48030000	50355000	4.83083e+07	211
LINF_080010700-T1-p1	LINF_080010700-T1-p1	eukaryotic translation initiation factor 2 beta subunit - putative	10	47338000	47544000	49518000	4.81333e+07	212
LINF_330034600-T1-p1	LINF_330034600-T1-p1	carboxypeptidase - putative	22	47704000	47787000	48881000	48124000	213
LINF_180012100-T1-p1	LINF_180012100-T1-p1	citrate synthase - putative	24	47867000	46148000	50313000	4.81093e+07	214
LINF_230009000-T1-p1	LINF_230009000-T1-p1	NADP-dependent alcohol dehydrogenase - putative	19	46334000	50777000	45074000	47395000	215
LINF_050013500-T1-p1	LINF_050013500-T1-p1	methylthioadenosine phosphorylase - putative	13	45427000	48780000	47834000	47347000	216
LINF_350038300-T1-p1	LINF_350038300-T1-p1;LINF_350038200-T1-p1	60S ribosomal subunit protein L31 - putative	9	47794000	48071000	43307000	4.63907e+07	217
LINF_330033000-T1-p1	LINF_330033000-T1-p1	heat shock protein - putative	32	45651000	46643000	44969000	4.57543e+07	218
LINF_320009400-T1-p1	LINF_320009400-T1-p1;LINF_240005200-T1-p1	60S ribosomal protein L17 - putative	5	43738000	46121000	47137000	4.56653e+07	219
LINF_060018800-T1-p1	LINF_060018800-T1-p1	pteridine transporter (truncated) - putative	16	48052000	45829000	42574000	45485000	220
LINF_210027000-T1-p1	LINF_210027000-T1-p1	60S ribosomal protein L32	8	44189000	45621000	46571000	4.54603e+07	221
LINF_140007400-T1-p1	LINF_140007400-T1-p1	Scavenger mRNA decapping enzyme C-term binding/HIT domain containing protein - putative	6	43646000	50366000	41785000	4.52657e+07	222
LINF_360053900-T1-p1	LINF_360053900-T1-p1	hypothetical protein - conserved	7	45466000	50245000	40056000	4.52557e+07	223
LINF_150022800-T1-p1	LINF_150022800-T1-p1	ribosomal protein S6 - putative	4	51034000	44127000	40600000	4.52537e+07	224
LINF_270025600-T1-p1	LINF_270025600-T1-p1	trypanothione synthetase - putative	32	44326000	45420000	45726000	4.51573e+07	225
LINF_350036300-T1-p1	LINF_350036300-T1-p1	ATP-dependent RNA helicase - putative	39	45345000	46994000	42753000	4.50307e+07	226
LINF_300033900-T1-p1	LINF_300033900-T1-p1	hypothetical protein - conserved	5	42018000	43041000	49924000	4.49943e+07	227
LINF_110016300-T1-p1	LINF_110016300-T1-p1	hypothetical protein - conserved	9	46767000	44342000	43245000	4.47847e+07	228
LINF_190017000-T1-p1	LINF_190017000-T1-p1	hypothetical protein - conserved	16	47979000	50661000	35024000	4.45547e+07	229
LINF_270010300-T1-p1	LINF_270010300-T1-p1;LINF_270010600-T1-p1;LINF_270010500-T1-p1;LINF_270010400-T1-p1;LINF_270010800-T1-p1;LINF_270010700-T1-p1;LINF_270011000-T1-p1;LINF_270010900-T1-p1	calpain-like cysteine peptidase - putative	42	46933000	44124000	42550000	4.45357e+07	230
LINF_160009700-T1-p1	LINF_160009700-T1-p1	60S ribosomal protein L21 - putative	1	40971000	52391000	40076000	4.44793e+07	231
LINF_080016000-T1-p1	LINF_080016000-T1-p1	stress-induced protein sti1	34	44434000	47143000	40542000	4.40397e+07	232
LINF_320028900-T1-p1	LINF_320028900-T1-p1	heat shock protein Hsp20 - putative	5	37123000	50123000	44862000	44036000	233
LINF_350024100-T1-p1	LINF_350024100-T1-p1;LINF_210013000-T1-p1	60S ribosomal protein L36 - putative	4	41039000	43603000	46748000	4.37967e+07	234
LINF_360046300-T1-p1	LINF_360046300-T1-p1;LINF_180019400-T1-p1	60S ribosomal protein L34 - putative	4	40122000	44179000	46892000	43731000	235
LINF_330037300-T1-p1	LINF_330037300-T1-p1	hypothetical protein - conserved	8	42529000	44034000	44059000	4.35407e+07	236
LINF_270019700-T1-p1	LINF_270019700-T1-p1	KH domain containing protein - putative	28	44241000	42409000	43827000	4.34923e+07	237
LINF_310017600-T1-p1	LINF_310017600-T1-p1	amidohydrolase - putative	22	42959000	44679000	42501000	4.33797e+07	238
LINF_120005600-T1-p1	LINF_120005600-T1-p1	ribonuclease mar1	9	43357000	42881000	42808000	4.30153e+07	239
LINF_080008200-T1-p1	LINF_080008200-T1-p1	mitochondrial associated ribonuclease - putative	9	41880000	40543000	45333000	4.25853e+07	240
LINF_110015700-T1-p1	LINF_110015700-T1-p1;LINF_110015600-T1-p1	40S ribosomal protein S5	6	45644000	40364000	41698000	4.25687e+07	241
LINF_060011400-T1-p1	LINF_060011400-T1-p1;LINF_060011300-T1-p1	60S ribosomal protein L23a - putative	7	39370000	42133000	44715000	4.20727e+07	242
LINF_260018800-T1-p1	LINF_260018800-T1-p1	prefoldin-like protein	10	42347000	42296000	41499000	4.20473e+07	243
LINF_210024400-T1-p1	LINF_210024400-T1-p1	hypothetical protein - conserved	19	40473000	42618000	41041000	4.13773e+07	244
LINF_270019800-T1-p1	LINF_270019800-T1-p1	arginyl-tRNA synthetase - putative	37	39651000	42681000	41253000	41195000	245
LINF_040010800-T1-p1	LINF_040010800-T1-p1	spermidine synthase	13	41689000	40113000	39966000	4.05893e+07	246
LINF_110016000-T1-p1	LINF_110016000-T1-p1	pyruvate phosphate dikinase - putative	46	39693000	40286000	40927000	40302000	247
LINF_320015700-T1-p1	LINF_320015700-T1-p1	chaperonin containing t-complex protein - putative	21	41369000	39413000	39976000	4.02527e+07	248
LINF_110005900-T1-p1	LINF_110005900-T1-p1	seryl-tRNA synthetase - putative	25	39531000	41010000	39740000	4.00937e+07	249
LINF_140019600-T1-p1	LINF_140019600-T1-p1	serine hydroxymethyltransferase (SHMT-L)	20	39630000	40366000	40212000	4.00693e+07	250
LINF_300009700-T1-p1	LINF_300009700-T1-p1	aspartyl-tRNA synthetase - putative	32	38019000	41283000	40751000	4.00177e+07	251
LINF_060006300-T1-p1	LINF_060006300-T1-p1	cyclophilin	8	40116000	37788000	41848000	3.99173e+07	252
LINF_320013900-T1-p1	LINF_320013900-T1-p1	hypothetical protein - conserved	13	37936000	43639000	38040000	3.98717e+07	253
LINF_330033600-T1-p1	LINF_330033600-T1-p1	hypothetical protein - conserved	19	40176000	41417000	37825000	39806000	254
LINF_290030100-T1-p1	LINF_290030100-T1-p1	metallo-peptidase - Clan MA(E) Family M1	26	39805000	39185000	40046000	3.96787e+07	255
LINF_210011100-T1-p1	LINF_210011100-T1-p1	dihydrolipoamide acetyltransferase precursorlike protein	10	40105000	39194000	38986000	3.94283e+07	256
LINF_140020900-T1-p1	LINF_140020900-T1-p1	hypothetical protein - conserved	28	42038000	40601000	35283000	3.93073e+07	257
LINF_350047100-T1-p1	LINF_350047100-T1-p1	poly(A)-binding protein 2	22	41283000	39569000	36152000	3.90013e+07	258
LINF_190020600-T1-p1	LINF_190020600-T1-p1	cysteine peptidase A (CPA)	9	36875000	41392000	38290000	3.88523e+07	259
LINF_060005200-T1-p1	LINF_060005200-T1-p1	WD domain - G-beta repeat - putative	30	37812000	40169000	38309000	3.87633e+07	260
LINF_260021500-T1-p1	LINF_260021500-T1-p1;LINF_260021400-T1-p1;LINF_260021300-T1-p1	40S ribosomal protein S33 - putative	4	39818000	45068000	30922000	3.86027e+07	261
LINF_310034100-T1-p1	LINF_310034100-T1-p1	calreticulin - putative	11	39358000	40169000	36164000	3.85637e+07	262
LINF_360019800-T1-p1	LINF_360019800-T1-p1	Transitional endoplasmic reticulum ATPase - putative	29	39441000	40121000	36054000	3.85387e+07	263
LINF_320011600-T1-p1	LINF_320011600-T1-p1	AMMECR1 - putative	10	39560000	39568000	35905000	3.83443e+07	264
LINF_310030700-T1-p1	LINF_310030700-T1-p1	3 -2-trans-enoyl-CoA isomerase - mitochondrial precursor - putative	10	39896000	38679000	35820000	3.81317e+07	265
LINF_320040200-T1-p1	LINF_320040200-T1-p1	chaperonin alpha subunit - putative	36	37822000	39647000	36428000	3.79657e+07	266
LINF_270014700-T1-p1	LINF_270014700-T1-p1	hypothetical protein - conserved	1	36006000	38886000	38706000	37866000	267
LINF_220020700-T1-p1	LINF_220020700-T1-p1	i/6 autoantigen-like protein	10	38242000	40869000	33711000	3.76073e+07	268
LINF_260028900-T1-p1	LINF_260028900-T1-p1;LINF_260028800-T1-p1	60S ribosomal protein L35 - putative	1	43390000	32835000	36209000	37478000	269
LINF_200016800-T1-p1	LINF_200016800-T1-p1;LINF_200016900-T1-p1	cysteine peptidase - Clan CA - family C2 - putative	20	37260000	38779000	35211000	3.70833e+07	270
LINF_140016700-T1-p1	LINF_140016700-T1-p1	COQ9 - putative	4	32027000	49832000	29386000	3.70817e+07	271
LINF_290025400-T1-p1	LINF_290025400-T1-p1;LINF_110017900-T1-p1	40S ribosomal protein S15A - putative	8	35128000	38470000	37317000	3.69717e+07	272
LINF_360005700-T1-p1	LINF_360005700-T1-p1	stress-inducible protein STI1 homolog	16	37613000	38243000	35030000	36962000	273
LINF_350012900-T1-p1	LINF_350012900-T1-p1	aspartate aminotransferase - putative	22	35666000	36879000	38276000	3.69403e+07	274
LINF_250027800-T1-p1	LINF_250027800-T1-p1	hypothetical protein - conserved	3	35024000	36228000	39050000	3.67673e+07	275
LINF_300036500-T1-p1	LINF_300036500-T1-p1	RNA-binding protein 42 (RNA-binding motif protein 42) - putative	9	37986000	36719000	35193000	3.66327e+07	276
LINF_350016600-T1-p1	LINF_350016600-T1-p1	NADH-dependent fumarate reductase - putative	51	34973000	37675000	37173000	36607000	277
LINF_310009700-T1-p1	LINF_310009700-T1-p1	cytoskeleton-associated protein CAP5.5 - putative	32	36137000	37773000	35878000	36596000	278
LINF_360031300-T1-p1	LINF_360031300-T1-p1;LINF_360031200-T1-p1	sterol 24-c-methyltransferase - putative	12	34504000	36878000	38104000	3.64953e+07	279
LINF_300012900-T1-p1	LINF_300012900-T1-p1	4-methyl-5(beta-hydroxyethyl)-thiazole monophosphate synthesis protein - putative	7	40195000	28944000	39826000	3.63217e+07	280
LINF_160015100-T1-p1	LINF_160015100-T1-p1	sucrose-phosphate synthase-like protein	24	34840000	36066000	37731000	3.62123e+07	281
LINF_200019700-T1-p1	LINF_200019700-T1-p1	hypothetical protein - conserved	6	38783000	36477000	32471000	3.59103e+07	282
LINF_310039800-T1-p1	LINF_310039800-T1-p1	phosphoglycan beta 1 -3 galactosyltransferase 5	33	36606000	34840000	35947000	3.57977e+07	283
LINF_190006400-T1-p1	LINF_190006400-T1-p1	metallo-peptidase - Clan MG - Family M24	19	34688000	36215000	36257000	35720000	284
LINF_050014800-T1-p1	LINF_050014800-T1-p1	metallo-peptidase - Clan M- - Family M49	35	34048000	36868000	35981000	3.56323e+07	285
LINF_360039100-T1-p1	LINF_360039100-T1-p1	ATP synthase - putative	8	32377000	36000000	37215000	3.51973e+07	286
LINF_350044000-T1-p1	LINF_350044000-T1-p1	T-complex protein 1 - eta subunit - putative	32	34634000	35057000	35228000	34973000	287
LINF_360068300-T1-p1	LINF_360068300-T1-p1	kinetoplast-associated protein - putative	2	32872000	37712000	33608000	3.47307e+07	288
LINF_270017500-T1-p1	LINF_270017500-T1-p1	mitochondrial RNA binding protein 1	9	34745000	36253000	32836000	3.46113e+07	289
LINF_280037300-T1-p1	LINF_280037300-T1-p1	glutamate dehydrogenase - putative	22	35298000	35555000	32766000	3.45397e+07	290
LINF_050005200-T1-p1	LINF_050005200-T1-p1	ras-like small GTPases - putative	10	36292000	33994000	32820000	3.43687e+07	291
LINF_280029400-T1-p1	LINF_280029400-T1-p1	glycosomal membrane protein - putative	7	35495000	33184000	33668000	3.41157e+07	292
LINF_160019000-T1-p1	LINF_160019000-T1-p1;LINF_160018900-T1-p1	cytochrome c - putative	4	34265000	34585000	33348000	34066000	293
LINF_310023800-T1-p1	LINF_310023800-T1-p1;LINF_310023700-T1-p1;LINF_310023600-T1-p1	3-ketoacyl-CoA thiolase-like protein - putative	21	31880000	32935000	37312000	3.40423e+07	294
LINF_200006000-T1-p1	LINF_200006000-T1-p1	phosphoglycerate kinase C - glycosomal	20	32073000	35843000	34147000	34021000	295
LINF_180007100-T1-p1	LINF_180007100-T1-p1	Activator of Hsp90 ATPase - N-terminal/Activator of Hsp90 ATPase homolog 1-like protein - putative	12	35313000	32340000	33756000	33803000	296
LINF_360050900-T1-p1	LINF_360050900-T1-p1	oxidoreductase - putative	14	32788000	35596000	32456000	3.36133e+07	297
LINF_160016100-T1-p1	LINF_160016100-T1-p1	ubiquitin fold modifier protein - putative	5	33047000	34396000	32652000	33365000	298
LINF_350008800-T1-p1	LINF_350008800-T1-p1	ATP-dependent DEAD-box RNA helicase - putative	22	32078000	32791000	34375000	3.30813e+07	299
LINF_350005800-T1-p1	LINF_350005800-T1-p1	prohibitin - putative	13	31167000	32995000	34516000	3.28927e+07	300
LINF_360060500-T1-p1	LINF_360060500-T1-p1	hypothetical protein - conserved	29	33513000	33317000	31620000	3.28167e+07	301
LINF_330013000-T1-p1	LINF_330013000-T1-p1	paraflagellar rod component - putative	5	33233000	32595000	32333000	3.27203e+07	302
LINF_110013800-T1-p1	LINF_110013800-T1-p1	hypothetical protein - conserved	11	34243000	32399000	31028000	3.25567e+07	303
LINF_180017600-T1-p1	LINF_180017600-T1-p1	prolyl-tRNA synthetase - putative	29	32557000	32196000	32848000	3.25337e+07	304
LINF_110012000-T1-p1	LINF_110012000-T1-p1;LINF_110011900-T1-p1	aminopeptidase - putative	25	30247000	33083000	31922000	3.17507e+07	306
LINF_140009900-T1-p1	LINF_140009900-T1-p1	N-terminal conserved domain of Nudc./CS domain containing protein - putative	12	31291000	31209000	32618000	31706000	307
LINF_340047600-T1-p1	LINF_340047600-T1-p1	nucleolar protein family a member-like protein	3	32512000	31883000	30313000	3.15693e+07	308
LINF_290014400-T1-p1	LINF_290014400-T1-p1	ADP-ribosylation factor-like protein 3A - putative	12	34761000	30161000	27471000	3.07977e+07	309
LINF_180022100-T1-p1	LINF_180022100-T1-p1	hypothetical protein - conserved	4	31185000	32461000	28485000	3.07103e+07	310
LINF_180020800-T1-p1	LINF_180020800-T1-p1;LINF_180020700-T1-p1;LINF_180020600-T1-p1	P-type H+-ATPase - putative	32	29665000	30160000	32172000	3.06657e+07	311
LINF_030014900-T1-p1	LINF_030014900-T1-p1	eukaryotic initiation factor 2a - putative	23	28292000	30707000	32085000	3.03613e+07	312
LINF_280031400-T1-p1	LINF_280031400-T1-p1	Vacuolar proton pump subunit B - putative	25	28145000	30091000	32670000	30302000	313
LINF_350014800-T1-p1	LINF_350014800-T1-p1	casein kinase - putative	17	29145000	30366000	31080000	30197000	314
LINF_350027100-T1-p1	LINF_350027100-T1-p1;LINF_240028300-T1-p1	60S ribosomal protein L12 - putative	2	30104000	30554000	29602000	3.00867e+07	315
LINF_280014900-T1-p1	LINF_280014900-T1-p1	Archaic translocase outer mitochondrial membrane 46 kDa subunit - putative	13	31377000	29769000	28685000	2.99437e+07	316
LINF_360022600-T1-p1	LINF_360022600-T1-p1	clathrin heavy chain - putative	69	29767000	30169000	29417000	2.97843e+07	317
LINF_090018100-T1-p1	LINF_090018100-T1-p1	translation initiation factor EIF-2B gamma subunit - putative	15	29812000	30519000	28937000	29756000	318
LINF_250013300-T1-p1	LINF_250013300-T1-p1	protein phosphatase - putative	15	29407000	30849000	28874000	29710000	319
LINF_190013000-T1-p1	LINF_190013000-T1-p1	vps53-like domain protein	4	30125000	28505000	30471000	2.97003e+07	320
LINF_250010600-T1-p1	LINF_250010600-T1-p1	Scd6-like Sm domain containing protein - putative	10	30569000	31697000	26517000	2.95943e+07	321
LINF_100015800-T1-p1	LINF_100015800-T1-p1	small GTP-binding protein Rab11 - putative	10	28678000	30111000	29677000	2.94887e+07	322
LINF_340051400-T1-p1	LINF_340051400-T1-p1;LINF_340051100-T1-p1	20s proteasome beta 7 subunit - (putative)	8	26823000	31343000	29936000	2.93673e+07	323
LINF_300030900-T1-p1	LINF_300030900-T1-p1	reticulon domain protein - 22 kDa potentially aggravating protein (paple22)	8	27264000	30872000	29720000	2.92853e+07	324
LINF_360081100-T1-p1	LINF_360081100-T1-p1	T-complex protein 1 - theta subunit - putative	25	29172000	30740000	27545000	2.91523e+07	325
LINF_110007300-T1-p1	LINF_110007300-T1-p1	proteasome alpha 7 subunit - putative	16	27483000	28144000	31737000	2.91213e+07	326
LINF_290006100-T1-p1	LINF_290006100-T1-p1	proteasome regulatory non-ATPase subunit - putative	34	27931000	28523000	30629000	2.90277e+07	327
LINF_020010800-T1-p1	LINF_020010800-T1-p1	hypothetical protein - conserved	7	29641000	29549000	27703000	2.89643e+07	328
LINF_130021300-T1-p1	LINF_130021300-T1-p1	ubiquitin-conjugating enzyme - putative	7	29417000	27476000	29831000	28908000	329
LINF_310017700-T1-p1	LINF_310017700-T1-p1	amidohydrolase - putative	6	28845000	27869000	29923000	28879000	330
LINF_330042600-T1-p1	LINF_330042600-T1-p1	h1 histone-like protein	2	32009000	31577000	22972000	2.88527e+07	331
LINF_060016300-T1-p1	LINF_060016300-T1-p1	protein disulfide isomerase	4	26633000	27635000	32238000	2.88353e+07	332
LINF_320028100-T1-p1	LINF_320028100-T1-p1	SAC3/GANP/Nin1/mts3/eIF-3 p25 family/COP9 signalosome - subunit CSN8 - putative	11	30558000	29456000	26468000	2.88273e+07	333
LINF_160022200-T1-p1	LINF_160022200-T1-p1	prohibitin	11	30016000	29978000	26480000	2.88247e+07	334
LINF_230026500-T1-p1	LINF_230026500-T1-p1	Nucleoside 2-deoxyribosyltransferase - putative	8	29723000	27860000	28833000	2.88053e+07	335
LINF_140006800-T1-p1	LINF_140006800-T1-p1	AhpC/TSA family/Thioredoxin-like - putative	13	27549000	30479000	28356000	2.87947e+07	336
LINF_220006800-T1-p1	LINF_220006800-T1-p1	hypothetical protein - conserved	12	28497000	29297000	28490000	2.87613e+07	337
LINF_320009600-T1-p1	LINF_320009600-T1-p1	40S ribosomal protein S2	1	30270000	28456000	27488000	28738000	338
LINF_210018500-T1-p1	LINF_210018500-T1-p1	T-complex protein 1 - delta subunit - putative	28	27487000	29804000	28912000	2.87343e+07	339
LINF_250006300-T1-p1	LINF_250006300-T1-p1	electron transfer flavoprotein - putative	10	25930000	27966000	32131000	2.86757e+07	340
LINF_280031800-T1-p1	LINF_280031800-T1-p1;LINF_280028800-T1-p1	ribosomal protein S29 - putative	3	23404000	31662000	30924000	2.86633e+07	341
LINF_290018600-T1-p1	LINF_290018600-T1-p1	Heat shock protein 100 kDa	39	27365000	28731000	29362000	28486000	342
LINF_340005000-T1-p1	LINF_340005000-T1-p1	short chain dehydrogenase - putative	11	26492000	29622000	29148000	2.84207e+07	343
LINF_280006000-T1-p1	LINF_280006000-T1-p1	proteasome beta 3 subunit - putative	7	27662000	28432000	29155000	2.84163e+07	344
LINF_050017300-T1-p1	LINF_050017300-T1-p1	prefoldin subunit - putative	11	29391000	28334000	27272000	2.83323e+07	345
LINF_320043700-T1-p1	LINF_320043700-T1-p1;LINF_320043800-T1-p1;LINF_320043900-T1-p1	3-hydroxyisobutyryl-coenzyme a hydrolase-like protein	18	27114000	28478000	29085000	2.82257e+07	346
LINF_360044500-T1-p1	LINF_360044500-T1-p1	cysteine synthase	17	27780000	28435000	28321000	2.81787e+07	347
LINF_220011600-T1-p1	LINF_220011600-T1-p1	proteasome regulatory ATPase subunit 5 - putative	20	28385000	28407000	27459000	2.80837e+07	348
LINF_030014700-T1-p1	LINF_030014700-T1-p1	hypothetical protein - conserved	3	27562000	31178000	25458000	28066000	349
LINF_270028100-T1-p1	LINF_270028100-T1-p1	RNA-binding protein - putative	6	28739000	27228000	28094000	2.80203e+07	350
LINF_360022900-T1-p1	LINF_360022900-T1-p1	proteasome subunit beta type-5 - putative	10	27109000	26473000	30152000	2.79113e+07	351
LINF_030006700-T1-p1	LINF_030006700-T1-p1	U2 splicing auxiliary factor - putative	9	28926000	28218000	26572000	2.79053e+07	352
LINF_320026100-T1-p1	LINF_320026100-T1-p1	Enriched in surface-labeled proteome protein 16	5	28013000	27397000	27967000	2.77923e+07	353
LINF_240024400-T1-p1	LINF_240024400-T1-p1	lysophospholipase - putative	9	27705000	27161000	28355000	2.77403e+07	354
LINF_360011800-T1-p1	LINF_360011800-T1-p1	Mitochondrial ATP synthase epsilon chain - putative	4	28387000	28713000	25891000	2.76637e+07	355
LINF_190021700-T1-p1	LINF_190021700-T1-p1	FK506-binding protein (FKBP)-type peptidyl-prolyl isomerase - putative	13	27808000	28741000	26310000	2.76197e+07	356
LINF_340006100-T1-p1	LINF_340006100-T1-p1	adenylate kinase - putative	12	27435000	28482000	26519000	2.74787e+07	357
LINF_290031400-T1-p1	LINF_290031400-T1-p1;LINF_160017500-T1-p1	60S ribosomal protein L39 - putative	3	22428000	27656000	32171000	2.74183e+07	358
LINF_210024300-T1-p1	LINF_210024300-T1-p1	ATP-dependent RNA helicase SUB2 - putative	25	26713000	28181000	27333000	27409000	359
LINF_260015200-T1-p1	LINF_260015200-T1-p1	dynein heavy chain - putative	25	26736000	27022000	28201000	2.73197e+07	360
LINF_220008000-T1-p1	LINF_220008000-T1-p1	hypothetical protein - conserved	21	28400000	27115000	26402000	2.73057e+07	361
LINF_340008600-T1-p1	LINF_340008600-T1-p1	eukaryotic translation initiation factor 5 - putative	16	26560000	27843000	27213000	2.72053e+07	362
LINF_320040100-T1-p1	LINF_320040100-T1-p1	glucosamine-6-phosphate isomerase - putative	13	26484000	27014000	27773000	2.70903e+07	363
LINF_050007700-T1-p1	LINF_050007700-T1-p1	protein tyrosine phosphatase - putative	9	26591000	26232000	28313000	2.70453e+07	364
LINF_360072700-T1-p1	LINF_360072700-T1-p1	chaperone protein DNAj - putative	13	28054000	25907000	26768000	2.69097e+07	365
LINF_350043800-T1-p1	LINF_350043800-T1-p1	proteasome beta 2 subunit - putative	9	25631000	27143000	27789000	2.68543e+07	366
LINF_180012600-T1-p1	LINF_180012600-T1-p1	Elongation factor Tu - mitochondrial - putative	23	26078000	27575000	26491000	2.67147e+07	367
LINF_260011600-T1-p1	LINF_260011600-T1-p1	protein disulfide isomerase - putative	18	28210000	25377000	26413000	2.66667e+07	368
LINF_130022300-T1-p1	LINF_130022300-T1-p1	pyrroline-5-carboxylate reductase	11	26554000	27381000	25646000	26527000	369
LINF_290030800-T1-p1	LINF_290030800-T1-p1	enoyl-CoA hydratase/isomerase-like protein	10	24813000	26417000	27855000	2.63617e+07	370
LINF_330007600-T1-p1	LINF_330007600-T1-p1	thiol-dependent reductase 1	19	27141000	25936000	25964000	26347000	371
LINF_210026800-T1-p1	LINF_210026800-T1-p1	proteasome alpha 2 subunit - putative	11	25478000	27234000	26253000	2.63217e+07	372
LINF_240012700-T1-p1	LINF_240012700-T1-p1	malic enzyme - putative	19	25019000	26617000	27309000	26315000	373
LINF_350025500-T1-p1	LINF_350025500-T1-p1	60S ribosomal protein L32	3	24724000	26774000	27300000	26266000	374
LINF_300036900-T1-p1	LINF_300036900-T1-p1	valyl-tRNA synthetase - putative	39	26116000	25755000	26922000	2.62643e+07	375
LINF_360069000-T1-p1	LINF_360069000-T1-p1	Haloacid dehalogenase-like hydrolase - putative	13	26416000	25712000	26388000	26172000	376
LINF_060009000-T1-p1	LINF_060009000-T1-p1	glutamine synthetase - putative	14	26079000	27226000	25174000	2.61597e+07	377
LINF_350053300-T1-p1	LINF_350053300-T1-p1	cyclophilin 40	15	26317000	28091000	23054000	2.58207e+07	378
LINF_230018500-T1-p1	LINF_230018500-T1-p1	hypothetical protein - conserved	6	27550000	35164000	14393000	2.57023e+07	379
LINF_360054400-T1-p1	LINF_360054400-T1-p1;LINF_130010500-T1-p1	60S ribosomal protein L18 - putative	6	27623000	25721000	23684000	25676000	380
LINF_060006500-T1-p1	LINF_060006500-T1-p1	20S proteasome beta 6 subunit - putative	6	23689000	24472000	27959000	2.53733e+07	381
LINF_180018200-T1-p1	LINF_180018200-T1-p1	Mitochondrial carrier protein - putative	11	24607000	27330000	24089000	25342000	382
LINF_250027100-T1-p1	LINF_250027100-T1-p1	hypothetical protein - conserved	18	24914000	27191000	23857000	2.53207e+07	383
LINF_170014800-T1-p1	LINF_170014800-T1-p1	guanosine monophosphate reductase	25	24570000	25668000	25667000	2.53017e+07	384
LINF_080017500-T1-p1	LINF_080017500-T1-p1	Amidinotransferase - putative	12	24651000	25890000	25349000	2.52967e+07	385
LINF_170019500-T1-p1	LINF_170019500-T1-p1	histone H2B	5	22345000	27303000	25850000	25166000	386
LINF_300015300-T1-p1	LINF_300015300-T1-p1	p22 protein precursor - putative	6	28006000	22156000	24924000	2.50287e+07	387
LINF_140012300-T1-p1	LINF_140012300-T1-p1	fatty acid elongase - putative	6	24739000	23894000	26300000	2.49777e+07	388
LINF_210009700-T1-p1	LINF_210009700-T1-p1	hypothetical protein - conserved	23	25204000	24856000	24279000	2.47797e+07	389
LINF_090013900-T1-p1	LINF_090013900-T1-p1	oligopeptidase b	40	23908000	24860000	25237000	2.46683e+07	390
LINF_070008800-T1-p1	LINF_070008800-T1-p1	ATP-dependent DEAD/H RNA helicase - putative	24	23366000	24985000	25074000	24475000	391
LINF_300008500-T1-p1	LINF_300008500-T1-p1	kinesin - putative	23	24387000	24901000	23823000	2.43703e+07	392
LINF_260024800-T1-p1	LINF_260024800-T1-p1	microtubule-associated protein - putative	79	24878000	24998000	23040000	2.43053e+07	393
LINF_260020700-T1-p1	LINF_260020700-T1-p1	thimet oligopeptidase - putative	32	24546000	23312000	25005000	2.42877e+07	394
LINF_300018100-T1-p1	LINF_300018100-T1-p1	pyridoxal kinase - putative	16	23835000	23113000	25692000	2.42133e+07	395
LINF_340018500-T1-p1	LINF_340018500-T1-p1	hypothetical protein	2	23430000	23910000	25230000	24190000	396
LINF_170008800-T1-p1	LINF_170008800-T1-p1	cystathionine beta-synthase	16	24203000	23572000	24632000	2.41357e+07	397
LINF_360081900-T1-p1	LINF_360081900-T1-p1	eukaryotic translation initiation factor 3 subunit 8 - putative	33	25102000	23419000	23874000	2.41317e+07	398
LINF_130022100-T1-p1	LINF_130022100-T1-p1	chaperonin TCP20 - putative	26	24046000	24488000	23834000	2.41227e+07	399
LINF_270030700-T1-p1	LINF_270030700-T1-p1	GTP binding protein - putative	15	25306000	23162000	23862000	24110000	400
LINF_300038100-T1-p1	LINF_300038100-T1-p1	glutamyl-tRNA synthetase - putative	28	23373000	25370000	23565000	2.41027e+07	401
LINF_290013700-T1-p1	LINF_290013700-T1-p1	high mobility group protein homolog tdp-1 - putative	9	22396000	25052000	24717000	24055000	402
LINF_270012500-T1-p1	LINF_270012500-T1-p1	hypothetical protein - conserved	11	23413000	23259000	25351000	2.40077e+07	403
LINF_170005000-T1-p1	LINF_170005000-T1-p1	hypothetical protein - conserved	31	22281000	25112000	24065000	2.38193e+07	404
LINF_080015800-T1-p1	LINF_080015800-T1-p1	hypothetical protein	23	24397000	23223000	23691000	2.37703e+07	405
LINF_070012000-T1-p1	LINF_070012000-T1-p1	hypothetical protein - conserved	16	25535000	22645000	23045000	2.37417e+07	406
LINF_360038200-T1-p1	LINF_360038200-T1-p1	exosome complex exonuclease RRP41A	6	23009000	21452000	26511000	2.36573e+07	407
LINF_320009700-T1-p1	LINF_320009700-T1-p1	prostaglandin f synthase - putative	11	23117000	23701000	23876000	2.35647e+07	408
LINF_290019000-T1-p1	LINF_290019000-T1-p1	carnitine/choline acetyltransferase - putative	24	22492000	24172000	23875000	23513000	409
LINF_040014600-T1-p1	LINF_040014600-T1-p1	adenylate kinase - putative	6	23302000	23079000	24135000	2.35053e+07	410
LINF_210027500-T1-p1	LINF_210027500-T1-p1	ATP synthase F1 subunit gamma protein - putative	13	21499000	23410000	25507000	23472000	411
LINF_340052200-T1-p1	LINF_340052200-T1-p1	1 -2-Dihydroxy-3-keto-5-methylthiopentene dioxygenase - putative	10	23830000	22210000	24299000	2.34463e+07	412
LINF_250022600-T1-p1	LINF_250022600-T1-p1	hypothetical protein - conserved	12	22335000	23977000	23766000	2.33593e+07	413
LINF_210013900-T1-p1	LINF_210013900-T1-p1	methionyl-tRNA synthetase	29	21285000	24695000	23938000	23306000	414
LINF_340050700-T1-p1	LINF_340050700-T1-p1	nucleolar protein family a - putative	4	25202000	24740000	19550000	23164000	415
LINF_360047700-T1-p1	LINF_360047700-T1-p1	eukaryotic translation initiation factor 3 subunit 2 - putative	13	22403000	24057000	22632000	2.30307e+07	416
LINF_300016800-T1-p1	LINF_300016800-T1-p1	importin alpha - putative	19	22825000	21230000	24868000	2.29743e+07	417
LINF_230006100-T1-p1	LINF_230006100-T1-p1	GDP-mannose pyrophosphorylase	22	23965000	23100000	21804000	2.29563e+07	418
LINF_270014300-T1-p1	LINF_270014300-T1-p1	glutaredoxin-like protein	4	22824000	21961000	23929000	2.29047e+07	419
LINF_320016400-T1-p1	LINF_320016400-T1-p1	small nuclear ribonucleoprotein - putative	2	22463000	24077000	21573000	2.27043e+07	420
LINF_350028800-T1-p1	LINF_350028800-T1-p1	aminopeptidase P - putative	14	23258000	21397000	23141000	2.25987e+07	421
LINF_310024900-T1-p1	LINF_310024900-T1-p1	nucleosome assembly protein-like protein	14	24378000	21570000	21522000	22490000	422
LINF_250022700-T1-p1	LINF_250022700-T1-p1	hypothetical protein - conserved	12	21619000	23187000	22579000	2.24617e+07	423
LINF_140012100-T1-p1	LINF_140012100-T1-p1	fatty acid elongase - putative	5	21896000	20904000	24199000	22333000	424
LINF_120005200-T1-p1	LINF_120005200-T1-p1	proteasome beta-1 subunit - putative	8	23996000	22481000	20501000	22326000	425
LINF_340044200-T1-p1	LINF_340044200-T1-p1	vacuolar ATP synthase catalytic subunit A - putative	35	22185000	22289000	22501000	22325000	426
LINF_340030100-T1-p1	LINF_340030100-T1-p1;LINF_100005600-T1-p1	ribosomal protein l35a - putative	7	22823000	22035000	22114000	22324000	427
LINF_150008100-T1-p1	LINF_150008100-T1-p1	ribonucleoprotein p18 - mitochondrial precursor - putative	2	21541000	22085000	22208000	2.19447e+07	428
LINF_100007300-T1-p1	LINF_100007300-T1-p1	Nucleolar protein 56 - putative	24	21708000	22949000	21111000	2.19227e+07	429
LINF_220013600-T1-p1	LINF_220013600-T1-p1	NADH-cytochrome b5 reductase - putative	16	21846000	21420000	22331000	2.18657e+07	430
LINF_120007600-T1-p1	LINF_120007600-T1-p1	cysteinyl-tRNA synthetase - putative	32	21554000	21648000	22121000	2.17743e+07	431
LINF_290036100-T1-p1	LINF_290036100-T1-p1	RNA recognition motif. (a.k.a. RRM - RBD - or RNP domain)/RNA recognition motif (a.k.a. RRM - RBD - or RNP domain) - putative | tr	6	21568000	23504000	20238000	21770000	432
LINF_290017400-T1-p1	LINF_290017400-T1-p1	tryparedoxin 2 - putative	6	21232000	20921000	22870000	2.16743e+07	433
LINF_140008100-T1-p1	LINF_140008100-T1-p1	proteasome alpha 3 subunit - putative	12	22075000	21299000	21364000	2.15793e+07	434
LINF_220012100-T1-p1	LINF_220012100-T1-p1	prefoldin 5-like protein	7	21568000	21235000	21651000	2.14847e+07	435
LINF_240017300-T1-p1	LINF_240017300-T1-p1	translation factor sui1 - putative	3	19190000	23376000	21491000	2.13523e+07	436
LINF_180010900-T1-p1	LINF_180010900-T1-p1	RNA binding protein - putative	8	21830000	21121000	21046000	2.13323e+07	437
LINF_300037500-T1-p1	LINF_300037500-T1-p1	3-hydroxy-3-methylglutaryl-CoA reductase	14	19574000	22155000	22177000	21302000	438
LINF_210027800-T1-p1	LINF_210027800-T1-p1;LINF_210027700-T1-p1	vacuolar ATP synthase - putative	1	22125000	22995000	18762000	21294000	439
LINF_190005800-T1-p1	LINF_190005800-T1-p1	fibrillarin - putative	9	21183000	21259000	21119000	21187000	440
LINF_210013400-T1-p1	LINF_210013400-T1-p1	proteasome regulatory non-ATP-ase subunit 5 - putative	25	20441000	20909000	21896000	21082000	441
LINF_360007700-T1-p1	LINF_360007700-T1-p1	eukaryotic translation initiation factor 3 subunit L - putative	20	21192000	21462000	20586000	21080000	442
LINF_190016600-T1-p1	LINF_190016600-T1-p1	proteasome regulatory non-ATP-ase subunit 9 - putative	24	20270000	20390000	22551000	2.10703e+07	443
LINF_360008400-T1-p1	LINF_360008400-T1-p1	20S proteasome subunit	8	21222000	21494000	20479000	21065000	444
LINF_270033860-T1-p1	LINF_270033860-T1-p1	hypothetical protein (non-ATG)	30	20692000	21915000	20374000	2.09937e+07	445
LINF_290008200-T1-p1	LINF_290008200-T1-p1	TPR repeat/Tetratricopeptide repeat - putative	9	20956000	20464000	21521000	2.09803e+07	446
LINF_360022300-T1-p1	LINF_360022300-T1-p1	proteasome subunit alpha type-1 - putative	11	20072000	22129000	20459000	2.08867e+07	447
LINF_270027100-T1-p1	LINF_270027100-T1-p1	GMP-PDE - delta subunit - putative	5	19743000	23165000	19731000	2.08797e+07	448
LINF_310016800-T1-p1	LINF_310016800-T1-p1	biotin/lipoate protein ligase-like protein	14	20587000	20397000	21618000	2.08673e+07	449
LINF_210027400-T1-p1	LINF_210027400-T1-p1	centromere/microtubule binding protein cbf5 - putative	22	20997000	21788000	19749000	2.08447e+07	450
LINF_300036000-T1-p1	LINF_300036000-T1-p1	eukaryotic translation initiation factor 3 subunit 7-like protein	20	20375000	20681000	21433000	2.08297e+07	451
LINF_190012000-T1-p1	LINF_190012000-T1-p1	glycosomal malate dehydrogenase	13	17457000	21337000	23437000	2.07437e+07	452
LINF_040009200-T1-p1	LINF_040009200-T1-p1	Tetratricopeptide repeat - putative	11	20694000	20632000	20904000	2.07433e+07	453
LINF_340026500-T1-p1	LINF_340026500-T1-p1	hypothetical protein - conserved	3	19615000	21521000	20779000	2.06383e+07	454
LINF_080015500-T1-p1	LINF_080015500-T1-p1;LINF_080015400-T1-p1;LINF_080015300-T1-p1;LINF_080015200-T1-p1;LINF_080014800-T1-p1;LINF_080014900-T1-p1;LINF_080014700-T1-p1;LINF_080015000-T1-p1	cysteine peptidase B (CPB)	12	21054000	20173000	20669000	20632000	455
LINF_140021000-T1-p1	LINF_140021000-T1-p1	Vacuolar 14 Fab1-binding region/Vacuolar protein 14 C-terminal Fig4p binding - putative	9	12995000	29110000	19551000	20552000	456
LINF_320016600-T1-p1	LINF_320016600-T1-p1	HECT-domain (ubiquitin-transferase) - putative	43	20428000	19808000	21339000	20525000	457
LINF_040016900-T1-p1	LINF_040016900-T1-p1	RNA-binding protein - putative	5	18966000	21417000	21001000	2.04613e+07	458
LINF_340041900-T1-p1	LINF_340041900-T1-p1	ruvb-like 1 DNA helicase - putative	22	20036000	21736000	19588000	2.04533e+07	459
LINF_160020800-T1-p1	LINF_160020800-T1-p1;LINF_160020700-T1-p1	kinesin - putative	6	21866000	21341000	18137000	20448000	460
LINF_160007400-T1-p1	LINF_160007400-T1-p1	protein tyrosine phosphatase-like protein	7	20648000	18935000	21451000	2.03447e+07	461
LINF_340050400-T1-p1	LINF_340050400-T1-p1	Unc104-like kinesin - putative	12	18506000	21231000	21103000	20280000	462
LINF_110013300-T1-p1	LINF_110013300-T1-p1;LINF_110013400-T1-p1	40S ribosomal protein S21 - putative	1	24682000	22868000	13237000	2.02623e+07	463
LINF_100011800-T1-p1	LINF_100011800-T1-p1	glycerol-3-phosphate dehydrogenase [NAD+] - glycosomal	15	18823000	20729000	21213000	20255000	464
LINF_220021600-T1-p1	LINF_220021600-T1-p1	alanyl-tRNA synthetase - putative	44	20135000	20187000	20423000	2.02483e+07	465
LINF_150018600-T1-p1	LINF_150018600-T1-p1;LINF_150018800-T1-p1	tryparedoxin peroxidase	1	26610000	6978400	27085000	2.02245e+07	466
LINF_240007900-T1-p1	LINF_240007900-T1-p1	fumarate hydratase - putative	26	19582000	21132000	19923000	2.02123e+07	467
LINF_360066000-T1-p1	LINF_360066000-T1-p1	isoleucyl-tRNA synthetase - putative	47	20072000	20356000	20106000	20178000	468
LINF_220019700-T1-p1	LINF_220019700-T1-p1	farnesyl pyrophosphate synthase	9	19786000	21218000	19422000	20142000	469
LINF_320005000-T1-p1	LINF_320005000-T1-p1	hypothetical protein - conserved	4	18764000	21049000	20344000	2.00523e+07	470
LINF_350048500-T1-p1	LINF_350048500-T1-p1	hypothetical protein - conserved	6	20205000	20180000	19475000	1.99533e+07	471
LINF_310033700-T1-p1	LINF_310033700-T1-p1	hypothetical protein - conserved	5	17823000	23424000	18482000	1.99097e+07	472
LINF_350021700-T1-p1	LINF_350021700-T1-p1;LINF_240026700-T1-p1	60S ribosomal protein L26 - putative	4	17250000	20257000	21836000	19781000	473
LINF_260022200-T1-p1	LINF_260022200-T1-p1	cytochrome c oxidase subunit V - putative	9	20381000	18858000	20019000	1.97527e+07	474
LINF_100015600-T1-p1	LINF_100015600-T1-p1	FKBP-type peptidyl-prolyl cis-trans isomerase - putative	6	19087000	18488000	21650000	1.97417e+07	475
LINF_290032200-T1-p1	LINF_290032200-T1-p1	heat shock protein 20 - putative	9	18363000	20820000	19849000	1.96773e+07	476
LINF_290029700-T1-p1	LINF_290029700-T1-p1	dynamin-1-like protein	32	18881000	19689000	20192000	1.95873e+07	477
LINF_310019400-T1-p1	LINF_310019400-T1-p1;LINF_310019600-T1-p1	pentamidine resistance protein 1	27	19278000	20095000	19125000	1.94993e+07	478
LINF_300012300-T1-p1	LINF_300012300-T1-p1	CDC16 - putative	6	18484000	18338000	21615000	19479000	479
LINF_240027400-T1-p1	LINF_240027400-T1-p1	hypothetical protein - conserved	2	20526000	20201000	17611000	19446000	480
LINF_290029300-T1-p1	LINF_290029300-T1-p1	rab-GDP dissociation inhibitor - putative	24	20132000	17654000	20321000	19369000	481
LINF_290012900-T1-p1	LINF_290012900-T1-p1	U-box domain protein - putative	19	18702000	18742000	20206000	1.92167e+07	482
LINF_330029300-T1-p1	LINF_330029300-T1-p1	hypothetical protein - conserved	18	18043000	19762000	19680000	1.91617e+07	483
LINF_310005700-T1-p1	LINF_310005700-T1-p1	hypothetical protein - conserved	7	19559000	19376000	18358000	1.90977e+07	484
LINF_340014900-T1-p1	LINF_340014900-T1-p1	hypothetical protein - conserved	3	19145000	19619000	18518000	19094000	485
LINF_310006600-T1-p1	LINF_310006600-T1-p1	DNA-directed RNA polymerase II subunit 2 - putative	37	18060000	19191000	19968000	19073000	486
LINF_140021100-T1-p1	LINF_140021100-T1-p1	mitochondrial pyruvate carrier protein 2 - putative	4	17643000	18205000	21246000	1.90313e+07	487
LINF_140020100-T1-p1	LINF_140020100-T1-p1	tyrosyl-tRNA synthetase - putative	25	18216000	18723000	19987000	1.89753e+07	488
LINF_260021100-T1-p1	LINF_260021100-T1-p1	proline oxidase - mitochondrial precursor-like protein	27	18346000	19200000	19206000	1.89173e+07	489
LINF_210017100-T1-p1	LINF_210017100-T1-p1	Programmed cell death protein 2 - C-terminal putative domain containing protein - putative	2	22404000	21147000	13177000	1.89093e+07	490
LINF_330042500-T1-p1	LINF_330042500-T1-p1;LINF_130022200-T1-p1	60S ribosomal protein L44 - putative	4	17441000	18377000	20907000	1.89083e+07	491
LINF_170020200-T1-p1	LINF_170020200-T1-p1	translation initiation factor - putative	28	18701000	18664000	19267000	1.88773e+07	492
LINF_090018500-T1-p1	LINF_090018500-T1-p1	mitochondrial RNA binding protein 2	5	18670000	18034000	19612000	18772000	493
LINF_110006700-T1-p1	LINF_110006700-T1-p1	cytoplasmic translation machinery associated protein - putative	7	18299000	18833000	19070000	18734000	494
LINF_220010200-T1-p1	LINF_220010200-T1-p1	Putative tRNA binding domain containing protein - putative	15	18074000	18412000	19691000	1.87257e+07	495
LINF_300032600-T1-p1	LINF_300032600-T1-p1	small glutamine-rich tetratricopeptide repeat protein - putative	16	19388000	18498000	18256000	18714000	496
LINF_240021800-T1-p1	LINF_240021800-T1-p1	Succinate dehydrogenase [ubiquinone] flavoprotein subunit - mitochondrial	25	18590000	17987000	19345000	1.86407e+07	497
LINF_290027200-T1-p1	LINF_290027200-T1-p1	fumarate hydratase - putative	28	18341000	19335000	18245000	1.86403e+07	498
LINF_350032700-T1-p1	LINF_350032700-T1-p1	galactokinase-like protein	22	17969000	19133000	18794000	18632000	499
LINF_260008200-T1-p1	LINF_260008200-T1-p1	C-1-tetrahydrofolate synthase - cytoplasmic - putative	10	17691000	19449000	18753000	18631000	500
LINF_360022400-T1-p1	LINF_360022400-T1-p1;LINF_360022500-T1-p1	universal minicircle sequence binding protein - putative	4	17873000	18810000	19157000	1.86133e+07	501
LINF_160020100-T1-p1	LINF_160020100-T1-p1	hypothetical protein - conserved	8	18020000	19107000	18560000	1.85623e+07	502
LINF_310011000-T1-p1	LINF_310011000-T1-p1	mevalonate kinase - putative	8	18901000	18854000	17858000	1.85377e+07	503
LINF_270008000-T1-p1	LINF_270008000-T1-p1	Acyl carrier protein - mitochondrial - putative	4	16918000	19726000	18916000	18520000	504
LINF_130016000-T1-p1	LINF_130016000-T1-p1	leucyl-tRNA synthetase - putative	47	18142000	18625000	18768000	1.85117e+07	505
LINF_110007000-T1-p1	LINF_110007000-T1-p1	acidocalcisomal pyrophosphatase	14	17874000	18185000	19362000	1.84737e+07	506
LINF_320027600-T1-p1	LINF_320027600-T1-p1	hypothetical protein - conserved	33	17084000	18231000	20057000	1.84573e+07	507
LINF_120007000-T1-p1	LINF_120007000-T1-p1	ubiquitin hydrolase - putative	7	17742000	17688000	19753000	1.83943e+07	508
LINF_190006300-T1-p1	LINF_190006300-T1-p1	mitogen-activated protein kinase kinase kinase - putative	13	18372000	18637000	18071000	18360000	509
LINF_330032400-T1-p1	LINF_330032400-T1-p1	succinyl-coA:3-ketoacid-coenzyme A transferase - mitochondrial precursor - putative	18	17933000	19310000	17454000	1.82323e+07	510
LINF_120011500-T1-p1	LINF_120011500-T1-p1	alanine aminotransferase	12	17887000	19042000	17700000	1.82097e+07	511
LINF_300006800-T1-p1	LINF_300006800-T1-p1	2-hydroxy-3-oxopropionate reductase - putative	10	19212000	19319000	16057000	18196000	512
LINF_290031100-T1-p1	LINF_290031100-T1-p1	Nucleosome assembly protein (NAP) - putative	7	17077000	18645000	18575000	18099000	513
LINF_130013700-T1-p1	LINF_130013700-T1-p1	hypothetical protein - conserved	17	16935000	18214000	18783000	1.79773e+07	514
LINF_150022600-T1-p1	LINF_150022600-T1-p1	proliferative cell nuclear antigen (PCNA) - putative	10	18324000	19460000	16120000	17968000	515
LINF_270015100-T1-p1	LINF_270015100-T1-p1	2-oxoglutarate dehydrogenase subunit - putative	34	18663000	17370000	17835000	17956000	516
LINF_340047900-T1-p1	LINF_340047900-T1-p1	hypothetical protein - conserved	4	19605000	18291000	15956000	1.79507e+07	517
LINF_320015100-T1-p1	LINF_320015100-T1-p1	Staphylococcal nuclease homologue/Tudor domain containing protein - putative	33	17873000	17584000	18083000	1.78467e+07	518
LINF_350056500-T1-p1	LINF_350056500-T1-p1;LINF_330028300-T1-p1	Ribosomal protein L37e - putative	2	17787000	18474000	17150000	1.78037e+07	519
LINF_320005800-T1-p1	LINF_320005800-T1-p1	N-myristoyl transferase - putative	16	17492000	18242000	17625000	1.77863e+07	520
LINF_320035300-T1-p1	LINF_320035300-T1-p1	proteasome regulatory non-ATP-ase subunit - putative	21	17103000	18404000	17834000	1.77803e+07	521
LINF_270024100-T1-p1	LINF_270024100-T1-p1	eRF1 domain 1/eRF1 domain 2/eRF1 domain 3 - putative	19	17296000	18439000	17585000	1.77733e+07	522
LINF_300012600-T1-p1	LINF_300012600-T1-p1	heat shock protein grpe	4	20185000	18597000	14192000	17658000	523
LINF_270023100-T1-p1	LINF_270023100-T1-p1	eukaryotic translation initiation factor eIF-4E - putative	7	17465000	17295000	18200000	1.76533e+07	524
LINF_020008700-T1-p1	LINF_020008700-T1-p1	proteasome regulatory non-ATPase subunit 6 - putative	24	16851000	18098000	17647000	17532000	525
LINF_050016700-T1-p1	LINF_050016700-T1-p1	V-type proton ATPase subunit D - putative	16	16538000	18294000	17742000	1.75247e+07	526
LINF_330013700-T1-p1	LINF_330013700-T1-p1	sterol C-24 reductase - putative	6	16900000	17227000	18338000	1.74883e+07	527
LINF_270006800-T1-p1	LINF_270006800-T1-p1	proteasome alpha 7 subunit - putative	9	17663000	18581000	16202000	17482000	528
LINF_340032100-T1-p1	LINF_340032100-T1-p1	ruvB-like DNA helicase - putative	22	17951000	18008000	16430000	17463000	529
LINF_360013000-T1-p1	LINF_360013000-T1-p1	zinc finger protein family member - putative	14	17357000	17152000	17788000	1.74323e+07	530
LINF_260008000-T1-p1	LINF_260008000-T1-p1	aminopeptidase-like protein	36	16868000	17671000	17756000	1.74317e+07	531
LINF_240028500-T1-p1	LINF_240028500-T1-p1	hypothetical protein - conserved	8	15389000	19006000	17867000	1.74207e+07	532
LINF_340021300-T1-p1	LINF_340021300-T1-p1;LINF_340021200-T1-p1	d-isomer specific 2-hydroxyacid dehydrogenase- protein	18	16354000	18005000	17827000	1.73953e+07	533
LINF_360044800-T1-p1	LINF_360044800-T1-p1	EF-hand domain pair/EF-hand domain containing protein - putative	6	18764000	17635000	15578000	1.73257e+07	534
LINF_260030400-T1-p1	LINF_260030400-T1-p1	CDP-diacylglycerol--inositol 3-phosphatidyltransferase - putative	8	17097000	16746000	18100000	1.73143e+07	535
LINF_250014000-T1-p1	LINF_250014000-T1-p1	Prefoldin subunit - putative	10	20774000	22071000	8856300	1.72338e+07	536
LINF_270017000-T1-p1	LINF_270017000-T1-p1	cysteine desulfurase - putative	23	16325000	17983000	17392000	1.72333e+07	537
LINF_030010200-T1-p1	LINF_030010200-T1-p1	26S protease regulatory subunit - putative	15	17570000	16141000	17746000	1.71523e+07	538
LINF_210028100-T1-p1	LINF_210028100-T1-p1	proteasome subunit alpha type-5 - putative	14	17701000	17548000	16181000	1.71433e+07	539
LINF_280029900-T1-p1	LINF_280029900-T1-p1	eukaryotic translation initiation factor - putative	21	16803000	18230000	16366000	17133000	540
LINF_040009500-T1-p1	LINF_040009500-T1-p1	cysteine peptidase - Clan CA - family C2 - putative	26	16971000	16902000	17510000	1.71277e+07	541
LINF_280017100-T1-p1	LINF_280017100-T1-p1	electron-transfer-flavoprotein - alpha polypeptide - putative	11	16737000	17507000	16980000	1.70747e+07	542
LINF_220020200-T1-p1	LINF_220020200-T1-p1	centrin-4 - putative	11	17161000	17955000	15987000	1.70343e+07	543
LINF_190009300-T1-p1	LINF_190009300-T1-p1	nucleosome assembly protein - putative	11	18079000	15456000	17462000	16999000	544
LINF_200018000-T1-p1	LINF_200018000-T1-p1	small myristoylated protein 4 - putative	6	17135000	16983000	16424000	1.68473e+07	545
LINF_230008000-T1-p1	LINF_230008000-T1-p1	pteridine reductase 1	13	16592000	17255000	16599000	1.68153e+07	546
LINF_350015200-T1-p1	LINF_350015200-T1-p1	protein kinase - putative	20	16950000	16479000	16943000	1.67907e+07	547
LINF_360022700-T1-p1	LINF_360022700-T1-p1	poly-zinc finger protein 2 - putative	4	15401000	18442000	16525000	1.67893e+07	548
LINF_350058200-T1-p1	LINF_350058200-T1-p1	Homeobox associated leucine zipper - putative	5	18189000	17318000	14847000	1.67847e+07	549
LINF_110012700-T1-p1	LINF_110012700-T1-p1	anion-transporting ATPase-like protein	10	16891000	16080000	16903000	1.66247e+07	550
LINF_240012800-T1-p1	LINF_240012800-T1-p1	malic enzyme - putative	25	15988000	16056000	17614000	1.65527e+07	551
LINF_260020500-T1-p1	LINF_260020500-T1-p1	trifunctional enzyme alpha subunit - mitochondrial precursor-like protein	36	16090000	16852000	16508000	1.64833e+07	552
LINF_200018100-T1-p1	LINF_200018100-T1-p1	Nucleosome assembly protein (NAP) - putative	5	17374000	15647000	16371000	16464000	553
LINF_020009900-T1-p1	LINF_020009900-T1-p1	hypothetical protein - conserved	3	15264000	16339000	17685000	1.64293e+07	554
LINF_320014300-T1-p1	LINF_320014300-T1-p1	phenylalanyl-tRNA synthetase alpha chain - putative	12	15937000	16316000	16656000	16303000	555
LINF_100011600-T1-p1	LINF_100011600-T1-p1	mitogen-activated protein kinase 3 - putative	14	15553000	16359000	16598000	16170000	556
LINF_200012900-T1-p1	LINF_200012900-T1-p1	hypothetical protein - conserved	3	15256000	14532000	18719000	16169000	557
LINF_240026000-T1-p1	LINF_240026000-T1-p1	STOP axonemal protein - putative	10	16177000	16756000	15567000	1.61667e+07	558
LINF_310005400-T1-p1	LINF_310005400-T1-p1	cyclophilin 5 - putative	13	15288000	16899000	16229000	1.61387e+07	559
LINF_250030600-T1-p1	LINF_250030600-T1-p1	AGC family serine/threonine kinase - putative	21	15808000	15960000	16594000	1.61207e+07	560
LINF_070009700-T1-p1	LINF_070009700-T1-p1	3-hydroxyacyl-ACP dehydratase - putative	9	17693000	15594000	15066000	1.61177e+07	561
LINF_320036100-T1-p1	LINF_320036100-T1-p1	SNAP protein - putative	8	16673000	15589000	16081000	1.61143e+07	562
LINF_350022400-T1-p1	LINF_350022400-T1-p1	dynein-associated roadblock protein-like protein	4	16153000	17314000	14640000	1.60357e+07	563
LINF_200006100-T1-p1	LINF_200006100-T1-p1	phosphoglycerate kinase C - glycosomal	1	15540000	16721000	15556000	15939000	564
LINF_290035900-T1-p1	LINF_290035900-T1-p1	ribonuclease inhibitor-like protein	2	19129000	12537000	16087000	1.59177e+07	565
LINF_290012700-T1-p1	LINF_290012700-T1-p1	heat shock protein 90 - putative	27	15311000	15295000	16925000	1.58437e+07	566
LINF_330016400-T1-p1	LINF_330016400-T1-p1	hypothetical protein - conserved	6	15596000	14972000	16874000	15814000	567
LINF_350018700-T1-p1	LINF_350018700-T1-p1	mitochondrial processing peptidase - beta subunit - putative	27	16084000	15466000	15881000	1.58103e+07	568
LINF_350026000-T1-p1	LINF_350026000-T1-p1	kinesin - putative	27	15470000	15162000	16637000	1.57563e+07	569
LINF_200014700-T1-p1	LINF_200014700-T1-p1	1 -2-Dihydroxy-3-keto-5-methylthiopentene dioxygenase - putative	13	14874000	15236000	17120000	1.57433e+07	570
LINF_190007400-T1-p1	LINF_190007400-T1-p1	C-terminal motor kinesin - putative	28	15145000	16734000	15118000	1.56657e+07	571
LINF_280009700-T1-p1	LINF_280009700-T1-p1	Saccharopine dehydrogenase - putative	17	14846000	16087000	15967000	1.56333e+07	572
LINF_250011100-T1-p1	LINF_250011100-T1-p1	hypothetical protein - conserved	4	18085000	17137000	11497000	15573000	573
LINF_360007500-T1-p1	LINF_360007500-T1-p1	peptidyl-prolyl cis-trans isomerase - putative	4	17412000	14025000	15062000	1.54997e+07	574
LINF_350055900-T1-p1	LINF_350055900-T1-p1	polyadenylate-binding protein 1	19	15273000	15764000	15437000	1.54913e+07	575
LINF_330022100-T1-p1	LINF_330022100-T1-p1	mitogen activated protein kinase - putative	19	15681000	15521000	15213000	1.54717e+07	576
LINF_200020900-T1-p1	LINF_200020900-T1-p1	Suppressor of G2 allele of SKP1 - putative	10	15403000	15498000	15420000	1.54403e+07	577
LINF_340039200-T1-p1	LINF_340039200-T1-p1	RNA editing associated helicase 2 - putative	13	15699000	14869000	15625000	1.53977e+07	578
LINF_340031200-T1-p1	LINF_340031200-T1-p1	flagellar attachment zone protein - putative	25	17407000	16186000	12576000	1.53897e+07	579
LINF_100014700-T1-p1	LINF_100014700-T1-p1	hypothetical protein - conserved	5	16069000	13758000	16333000	1.53867e+07	580
LINF_260031300-T1-p1	LINF_260031300-T1-p1	hypothetical protein - conserved	3	16354000	14587000	14681000	1.52073e+07	581
LINF_300042300-T1-p1	LINF_300042300-T1-p1	ribosomal protein L15 - putative	1	16514000	16789000	12209000	1.51707e+07	582
LINF_320025500-T1-p1	LINF_320025500-T1-p1	1-acyl-sn-glycerol-3-phosphateacyltransferase-like protein - putative	11	15171000	14036000	16290000	1.51657e+07	583
LINF_330037400-T1-p1	LINF_330037400-T1-p1	transcription elongation factor-like protein	18	15500000	14743000	15224000	1.51557e+07	584
LINF_280007300-T1-p1	LINF_280007300-T1-p1	glycerol-3-phosphate dehydrogenase (FAD-dependent) - mitochondrial	22	14973000	15699000	14436000	15036000	585
LINF_160010500-T1-p1	LINF_160010500-T1-p1	aspartate carbamoyltransferase - putative	16	15275000	14521000	15164000	1.49867e+07	586
LINF_350053000-T1-p1	LINF_350053000-T1-p1	lipoic acid containing carrier protein - putative	3	15956000	14887000	14073000	14972000	587
LINF_310006400-T1-p1	LINF_310006400-T1-p1	ubiquitin carboxyl-terminal hydrolase - putative	14	14862000	14678000	15279000	1.49397e+07	588
LINF_300029100-T1-p1	LINF_300029100-T1-p1	ADP-ribosylation factor-like protein	7	14289000	17170000	13320000	1.49263e+07	589
LINF_150007600-T1-p1	LINF_150007600-T1-p1	lysyl-tRNA synthetase - putative	30	14897000	14645000	15197000	14913000	590
LINF_250022800-T1-p1	LINF_250022800-T1-p1	diacylglycerol acyltransferase - putative	3	14763000	15443000	14454000	1.48867e+07	591
LINF_050015800-T1-p1	LINF_050015800-T1-p1	stomatin-like protein	16	15156000	14516000	14973000	1.48817e+07	592
LINF_330024500-T1-p1	LINF_330024500-T1-p1	peptidase m20/m25/m40 family-like protein	17	14097000	14864000	15587000	1.48493e+07	593
LINF_140006700-T1-p1	LINF_140006700-T1-p1;LINF_360072600-T1-p1	carboxypeptidase - putative	20	14149000	15550000	14835000	1.48447e+07	594
LINF_300022600-T1-p1	LINF_300022600-T1-p1	Intraflagellar transport complex B protein 46 C terminal - putative	5	15085000	15623000	13794000	14834000	595
LINF_260005200-T1-p1	LINF_260005200-T1-p1	methylmalonyl-coa epimerase-like protein	6	13748000	15314000	15378000	1.48133e+07	596
LINF_340012100-T1-p1	LINF_340012100-T1-p1	proteasome regulatory non-ATPase subunit 11 - putative	13	14697000	14958000	14655000	14770000	597
LINF_240024000-T1-p1	LINF_240024000-T1-p1	hypothetical protein - conserved	2	13167000	16369000	14765000	14767000	598
LINF_300008800-T1-p1	LINF_300008800-T1-p1	phosphatase 2C - putative	13	14506000	14514000	14980000	1.46667e+07	599
LINF_320005100-T1-p1	LINF_320005100-T1-p1	nuclear segregation protein - putative	21	14478000	14899000	14617000	1.46647e+07	600
LINF_250005800-T1-p1	LINF_250005800-T1-p1	poly(A)-binding protein 3	16	14022000	14178000	15523000	1.45743e+07	601
LINF_320021600-T1-p1	LINF_320021600-T1-p1	phosphomannose isomerase	22	14413000	14378000	14911000	1.45673e+07	602
LINF_050011500-T1-p1	LINF_050011500-T1-p1	Ankyrin repeats (many copies)/Ankyrin repeats (3 copies)/Ankyrin repeat - putative	6	15114000	13963000	14430000	1.45023e+07	603
LINF_350019000-T1-p1	LINF_350019000-T1-p1	threonyl-tRNA synthetase - putative	39	13763000	14605000	15043000	1.44703e+07	604
LINF_120007200-T1-p1	LINF_120007200-T1-p1	proteasome regulatory ATPase subunittcc1l8.3 - putative	17	14155000	14920000	14222000	1.44323e+07	605
LINF_350016200-T1-p1	LINF_350016200-T1-p1	oligosaccharyl transferase subunit - putative	18	14134000	14809000	14309000	1.44173e+07	606
LINF_270005300-T1-p1	LINF_270005300-T1-p1	CAAX prenyl protease 1 - putative	12	14443000	14567000	14237000	1.44157e+07	607
LINF_300006300-T1-p1	LINF_300006300-T1-p1	alkyldihydroxyacetonephosphate synthase	20	14084000	14076000	14908000	14356000	608
LINF_360070100-T1-p1	LINF_360070100-T1-p1	OTU-like cysteine protease - putative	7	15121000	13657000	14255000	1.43443e+07	609
LINF_280020800-T1-p1	LINF_280020800-T1-p1	Protein of unknown function (DUF423) - putative	6	14328000	13368000	15327000	14341000	610
LINF_320023100-T1-p1	LINF_320023100-T1-p1	zinc finger protein 2 - putative	2	15114000	13066000	14835000	1.43383e+07	611
LINF_270024200-T1-p1	LINF_270024200-T1-p1	hypothetical protein - conserved	12	14326000	14644000	14039000	1.43363e+07	612
LINF_070018200-T1-p1	LINF_070018200-T1-p1	peptide methionine sulfoxide reductase-like	11	13705000	14258000	14780000	1.42477e+07	613
LINF_080006700-T1-p1	LINF_080006700-T1-p1	hypothetical protein - conserved	21	12897000	14273000	15457000	14209000	614
LINF_150005300-T1-p1	LINF_150005300-T1-p1	Possible lysine decarboxylase - putative	14	14004000	14748000	13706000	1.41527e+07	615
LINF_140020000-T1-p1	LINF_140020000-T1-p1	inositol-3-phosphate synthase	26	13364000	14203000	14867000	1.41447e+07	616
LINF_190014900-T1-p1	LINF_190014900-T1-p1	peptidyl-prolyl cis-trans isomerase - macrophage infectivity potentiator precursor - putative	6	13291000	13596000	15527000	14138000	617
LINF_330028000-T1-p1	LINF_330028000-T1-p1	phosphoribosylpyrophosphate synthetase - putative	13	14041000	14315000	13909000	1.40883e+07	618
LINF_120011800-T1-p1	LINF_120011800-T1-p1	protein phosphatase with EF-Hand domains (PPEF)	23	13676000	14158000	14410000	1.40813e+07	619
LINF_040011900-T1-p1	LINF_040011900-T1-p1	ubiquitin-conjugating enzyme E2 - putative	8	13696000	13612000	14788000	14032000	620
LINF_290033500-T1-p1	LINF_290033500-T1-p1	serine/threonine-protein kinase - putative	16	13459000	14827000	13779000	1.40217e+07	621
LINF_140012200-T1-p1	LINF_140012200-T1-p1	fatty acid elongase - putative	7	13633000	13579000	14803000	14005000	622
LINF_190022000-T1-p1	LINF_190022000-T1-p1	inosine-5-monophosphate dehydrogenase	20	13922000	14341000	13696000	1.39863e+07	623
LINF_270022100-T1-p1	LINF_270022100-T1-p1	Domain of unknown function (DUF543) - putative	5	13430000	12758000	15418000	1.38687e+07	624
LINF_360060800-T1-p1	LINF_360060800-T1-p1	hypothetical protein - conserved	11	13557000	14181000	13829000	1.38557e+07	625
LINF_360028600-T1-p1	LINF_360028600-T1-p1	transmembrane emp24 domain-containing protein	4	13851000	13156000	14467000	1.38247e+07	626
LINF_280014500-T1-p1	LINF_280014500-T1-p1	ribonucleoside-diphosphate reductase large chain - putative	26	13231000	13724000	14411000	1.37887e+07	627
LINF_340035100-T1-p1	LINF_340035100-T1-p1	regulatory subunit of protein kinase a-like protein	28	13919000	13231000	14190000	13780000	628
LINF_330034900-T1-p1	LINF_330034900-T1-p1	metallo-peptidase - Clan MF - Family M17	18	13273000	13896000	14160000	1.37763e+07	629
LINF_230005800-T1-p1	LINF_230005800-T1-p1	hypothetical protein - conserved	20	14486000	13634000	13117000	1.37457e+07	630
LINF_290030700-T1-p1	LINF_290030700-T1-p1	ubiquitin hydrolase - putative	21	14616000	13161000	13457000	1.37447e+07	631
LINF_090011500-T1-p1	LINF_090011500-T1-p1	Histidine phosphatase superfamily (branch 1) - putative	8	14146000	12981000	14049000	1.37253e+07	632
LINF_340010100-T1-p1	LINF_340010100-T1-p1	importin beta-1 subunit - putative	18	14336000	12733000	14067000	13712000	633
LINF_360063600-T1-p1	LINF_360063600-T1-p1	phosphoribosylpyrophosphate synthetase - putative	7	13920000	13777000	13256000	13651000	634
LINF_350058500-T1-p1	LINF_350058500-T1-p1	Lsm12 protein - putative	5	14740000	12948000	13143000	1.36103e+07	635
LINF_360052900-T1-p1	LINF_360052900-T1-p1	19S proteasome regulatory subunit	12	14076000	13572000	13163000	1.36037e+07	636
LINF_270033830-T1-p1	LINF_270033830-T1-p1;LINF_020012400-T1-p1	hypothetical protein	34	13390000	14046000	13373000	13603000	637
LINF_160016900-T1-p1	LINF_160016900-T1-p1	tyrosyl or methionyl-tRNA synthetase-like protein	14	13609000	13703000	13481000	1.35977e+07	638
LINF_290006900-T1-p1	LINF_290006900-T1-p1	SNF2 family N-terminal domain/Helicase conserved C-terminal domain containing protein - putative	5	13734000	11378000	15543000	1.35517e+07	639
LINF_140015400-T1-p1	LINF_140015400-T1-p1	tc40 antigen-like	30	13619000	13475000	13502000	13532000	640
LINF_190005900-T1-p1	LINF_190005900-T1-p1	Clathrin light chain - putative	4	13560000	13177000	13840000	1.35257e+07	641
LINF_250016700-T1-p1	LINF_250016700-T1-p1	hypothetical protein - conserved	10	14136000	13436000	12939000	1.35037e+07	642
LINF_340007000-T1-p1	LINF_340007000-T1-p1	Domain of unknown function (DUF1935) - putative	10	13812000	12940000	13731000	1.34943e+07	643
LINF_190015300-T1-p1	LINF_190015300-T1-p1	4-coumarate:coa ligase-like protein	21	13385000	13208000	13619000	13404000	644
LINF_290016900-T1-p1	LINF_290016900-T1-p1	Ankyrin repeats (3 copies)/Ankyrin repeats (many copies)/Ankyrin repeat - putative	11	12928000	13250000	13724000	1.33007e+07	645
LINF_270018600-T1-p1	LINF_270018600-T1-p1	hypothetical protein - conserved	20	13018000	14372000	12499000	1.32963e+07	646
LINF_120014700-T1-p1	LINF_120014700-T1-p1	surface antigen protein 2 - putative	8	12196000	13075000	14441000	1.32373e+07	647
LINF_340051700-T1-p1	LINF_340051700-T1-p1	cell differentiation protein-like protein	10	13056000	12855000	13599000	13170000	648
LINF_330031700-T1-p1	LINF_330031700-T1-p1	hypothetical protein - conserved	7	13559000	13193000	12694000	1.31487e+07	649
LINF_050012600-T1-p1	LINF_050012600-T1-p1	Vta1 like - putative	9	12614000	13689000	13115000	1.31393e+07	650
LINF_250012600-T1-p1	LINF_250012600-T1-p1	Thioredoxin/Thioredoxin-like - putative	5	13186000	12234000	13960000	1.31267e+07	651
LINF_320005500-T1-p1	LINF_320005500-T1-p1	protein transport protein SEC13 - putative	12	12514000	13620000	13235000	13123000	652
LINF_200007400-T1-p1	LINF_200007400-T1-p1	transmembrane protein - putative	7	12796000	14480000	12075000	13117000	653
LINF_340052400-T1-p1	LINF_340052400-T1-p1	hypothetical protein - conserved	22	12798000	12898000	13637000	13111000	654
LINF_190011700-T1-p1	LINF_190011700-T1-p1	kinesin - putative	26	12806000	13557000	12797000	1.30533e+07	655
LINF_330024300-T1-p1	LINF_330024300-T1-p1	3-ketoacyl-CoA reductase - putative	12	11928000	13073000	14026000	13009000	656
LINF_130020200-T1-p1	LINF_130020200-T1-p1	Ran-binding protein 1 - putative	5	12063000	13607000	13354000	13008000	657
LINF_280024500-T1-p1	LINF_280024500-T1-p1	replication factor A - 51kDa subunit - putative	21	12855000	13164000	12732000	12917000	658
LINF_300040000-T1-p1	LINF_300040000-T1-p1	protein mkt1 - putative	22	13123000	12094000	13528000	12915000	659
LINF_280023600-T1-p1	LINF_280023600-T1-p1	proteasome regulatory non-ATP-ase subunit 2 - putative	33	12556000	12772000	13404000	1.29107e+07	660
LINF_360022800-T1-p1	LINF_360022800-T1-p1	universal minicircle sequence binding protein - putative	2	13328000	13494000	11890000	12904000	661
LINF_360070500-T1-p1	LINF_360070500-T1-p1	eukaryotic translation initation factor 4 gamma - putative	25	13670000	12339000	12702000	1.29037e+07	662
LINF_100005800-T1-p1	LINF_100005800-T1-p1	dehydrogenase-like protein	14	12468000	13130000	13075000	12891000	663
LINF_360008800-T1-p1	LINF_360008800-T1-p1	Integral membrane protein DUF106 - putative	6	12945000	12103000	13539000	1.28623e+07	664
LINF_050009500-T1-p1	LINF_050009500-T1-p1	hypothetical protein - conserved	11	12252000	11565000	14710000	1.28423e+07	665
LINF_330029600-T1-p1	LINF_330029600-T1-p1	mitogen-activated protein kinase - putative	4	13000000	13332000	12194000	12842000	666
LINF_010009800-T1-p1	LINF_010009800-T1-p1	long-chain-fatty-acid-CoA ligase - putative	24	12897000	12899000	12709000	12835000	667
LINF_280025600-T1-p1	LINF_280025600-T1-p1	Double-stranded DNA-binding domain containing protein - putative	4	15255000	12246000	10994000	1.28317e+07	668
LINF_230014100-T1-p1	LINF_230014100-T1-p1	hypothetical protein - conserved	15	12387000	13060000	13026000	1.28243e+07	669
LINF_270021700-T1-p1	LINF_270021700-T1-p1	hypothetical protein - conserved	4	13160000	12494000	12784000	1.28127e+07	670
LINF_220011100-T1-p1	LINF_220011100-T1-p1	proteasome regulatory ATPase subunit 1 - putative	18	12371000	12768000	13234000	12791000	671
LINF_180014200-T1-p1	LINF_180014200-T1-p1	rab7 GTP binding protein - putative	5	12659000	13093000	12600000	12784000	672
LINF_290018300-T1-p1	LINF_290018300-T1-p1	Hsp70 protein/TPR repeat/Tetratricopeptide repeat - putative	27	12686000	13183000	12454000	1.27743e+07	673
LINF_250031400-T1-p1	LINF_250031400-T1-p1	hypothetical protein - conserved	37	12439000	12815000	12806000	1.26867e+07	674
LINF_350007000-T1-p1	LINF_350007000-T1-p1	NLI interacting factor-like phosphatase - putative	11	12320000	13497000	12230000	1.26823e+07	675
LINF_320023000-T1-p1	LINF_320023000-T1-p1	coatomer subunit epsilon	14	11996000	13240000	12722000	1.26527e+07	676
LINF_040016700-T1-p1	LINF_040016700-T1-p1	fructose-1 -6-bisphosphatase	14	11702000	13452000	12710000	1.26213e+07	677
LINF_300037100-T1-p1	LINF_300037100-T1-p1	Translocon-associated protein beta (TRAPB)/Domain of unknown function DUF11/CARDB - putative	7	13169000	13440000	11216000	1.26083e+07	678
LINF_270015600-T1-p1	LINF_270015600-T1-p1	isovaleryl-coA dehydrogenase - putative	12	12597000	12127000	12938000	12554000	679
LINF_310029900-T1-p1	LINF_310029900-T1-p1	ARM-like helical domain-containing protein	38	12087000	12239000	13307000	1.25443e+07	680
LINF_170020100-T1-p1	LINF_170020100-T1-p1	hypothetical protein - conserved	5	13360000	11182000	13062000	1.25347e+07	681
LINF_190020400-T1-p1	LINF_190020400-T1-p1	Tetratricopeptide repeat - putative	13	12813000	12542000	12214000	12523000	682
LINF_260013200-T1-p1	LINF_260013200-T1-p1	aspartate--ammonia ligase - putative	14	12937000	12233000	12340000	1.25033e+07	683
LINF_160010400-T1-p1	LINF_160010400-T1-p1	dihydroorotate dehydrogenase (fumarate)	9	11608000	13249000	12639000	1.24987e+07	684
LINF_360052400-T1-p1	LINF_360052400-T1-p1	SET domain containing protein - putative	4	13473000	8038400	15924000	1.24785e+07	685
LINF_320036500-T1-p1	LINF_320036500-T1-p1	tubulin-tyrosine ligase-like protein	3	13320000	11120000	12860000	1.24333e+07	686
LINF_360061300-T1-p1	LINF_360061300-T1-p1	aldehyde dehydrogenase - putative	23	12414000	12172000	12649000	1.24117e+07	687
LINF_340038100-T1-p1	LINF_340038100-T1-p1;LINF_340037600-T1-p1	hypothetical protein - conserved	14	12477000	12323000	12429000	1.24097e+07	688
LINF_340026400-T1-p1	LINF_340026400-T1-p1	ubiquitin-like protein	5	12712000	12221000	12173000	1.23687e+07	689
LINF_190006700-T1-p1	LINF_190006700-T1-p1	Multiprotein-bridging factor 1 - putative	7	10679000	13738000	12625000	1.23473e+07	690
LINF_170016800-T1-p1	LINF_170016800-T1-p1	Mak10 subunit - NatC N(alpha)-terminal acetyltransferase - putative	27	11979000	12455000	12586000	12340000	691
LINF_340046300-T1-p1	LINF_340046300-T1-p1	small nuclear ribonucleoprotein - putative	3	12376000	10600000	13876000	12284000	692
LINF_350054400-T1-p1	LINF_350054400-T1-p1	TPR repeat/Tetratricopeptide repeat/Uncharacterised protein family (UPF0121) - putative	10	12897000	11515000	12406000	1.22727e+07	693
LINF_130015900-T1-p1	LINF_130015900-T1-p1	proteasome regulatory ATPase subunit 2 - putative	21	12606000	12222000	11829000	12219000	694
LINF_360019100-T1-p1	LINF_360019100-T1-p1	N-acetyltransferase subunit Nat1 - putative	30	11997000	12082000	12489000	1.21893e+07	695
LINF_340011700-T1-p1	LINF_340011700-T1-p1	enoyl-[acyl-carrier-protein] reductase - putative	10	11905000	12739000	11668000	12104000	696
LINF_100020500-T1-p1	LINF_100020500-T1-p1	Protein of unknown function (DUF1861) - putative	8	11229000	11576000	13439000	1.20813e+07	697
LINF_350025900-T1-p1	LINF_350025900-T1-p1	calcium motive p-type ATPase - putative	26	12062000	12161000	12010000	1.20777e+07	698
LINF_270018900-T1-p1	LINF_270018900-T1-p1	WD domain - G-beta repeat - putative	17	11601000	12039000	12440000	1.20267e+07	699
LINF_060016800-T1-p1	LINF_060016800-T1-p1	hypothetical protein - conserved	13	11168000	12029000	12831000	1.20093e+07	700
LINF_140006400-T1-p1	LINF_140006400-T1-p1	60S ribosomal protein - putative	5	11626000	11932000	12319000	11959000	701
LINF_110016500-T1-p1	LINF_110016500-T1-p1	pretranslocation protein - alpha subunit - putative	7	11083000	12353000	12427000	1.19543e+07	702
LINF_300014200-T1-p1	LINF_300014200-T1-p1;LINF_300014100-T1-p1	surface protein amastin - putative	3	11515000	11731000	12598000	11948000	703
LINF_180015200-T1-p1	LINF_180015200-T1-p1	UDP-glucose pyrophosphorylase	19	12006000	11629000	12187000	1.19407e+07	704
LINF_290024200-T1-p1	LINF_290024200-T1-p1;LINF_290025100-T1-p1;LINF_290025000-T1-p1;LINF_290024400-T1-p1;LINF_290024300-T1-p1;LINF_290024700-T1-p1;LINF_290024600-T1-p1;LINF_290024900-T1-p1;LINF_290024800-T1-p1;LINF_290024500-T1-p1	paraflagellar rod protein 1D - putative	19	11524000	11648000	12563000	1.19117e+07	705
LINF_300031100-T1-p1	LINF_300031100-T1-p1	formate--tetrahydrofolate ligase	19	12314000	11953000	11447000	1.19047e+07	706
LINF_250028200-T1-p1	LINF_250028200-T1-p1	Translation initiation factor eIF3 subunit - putative	5	11810000	13643000	10243000	1.18987e+07	707
LINF_360079300-T1-p1	LINF_360079300-T1-p1	serine peptidase clan SC - family S9A - putative	41	11458000	11964000	12252000	1.18913e+07	708
LINF_320009000-T1-p1	LINF_320009000-T1-p1	19S proteasome non-atpase subunit 8	13	10823000	11532000	13261000	11872000	709
LINF_210021600-T1-p1	LINF_210021600-T1-p1	ATP synthase - putative	19	11800000	12092000	11667000	11853000	710
LINF_310038500-T1-p1	LINF_310038500-T1-p1	acetyl-CoA carboxylase - putative	71	11775000	11521000	12155000	11817000	711
LINF_330032700-T1-p1	LINF_330032700-T1-p1	hypothetical protein - conserved	12	11857000	10682000	12574000	1.17043e+07	712
LINF_130016900-T1-p1	LINF_130016900-T1-p1	adenylosuccinate synthetase - putative	30	11627000	12125000	11352000	1.17013e+07	713
LINF_240023700-T1-p1	LINF_240023700-T1-p1	inhibitor of cysteine peptidase	5	11487000	11238000	12370000	1.16983e+07	714
LINF_130021700-T1-p1	LINF_130021700-T1-p1	squalene monooxygenase-like protein	15	11366000	11707000	11948000	1.16737e+07	715
LINF_320010200-T1-p1	LINF_320010200-T1-p1	Ras-related protein Rab4 - putative	3	10370000	12046000	12505000	1.16403e+07	716
LINF_210012200-T1-p1	LINF_210012200-T1-p1	nucleotide-binding protein - putative	5	11540000	11085000	12289000	11638000	717
LINF_210011000-T1-p1	LINF_210011000-T1-p1	la RNA binding protein - putative	12	11836000	11097000	11967000	1.16333e+07	718
LINF_300033500-T1-p1	LINF_300033500-T1-p1	chaperonin HSP60/CNP60 - putative	18	11471000	11729000	11671000	1.16237e+07	719
LINF_310031000-T1-p1	LINF_310031000-T1-p1	ADP-ribosylation factor - putative	7	11239000	12606000	10960000	1.16017e+07	720
LINF_350035900-T1-p1	LINF_350035900-T1-p1	ubiquitin-activating enzyme E1 - putative	36	11339000	11513000	11830000	1.15607e+07	721
LINF_240027800-T1-p1	LINF_240027800-T1-p1	Glycerophosphoryl diester phosphodiesterase family - putative	13	10967000	11766000	11816000	1.15163e+07	722
LINF_030007100-T1-p1	LINF_030007100-T1-p1	long-chain-fatty-acid-CoA ligase - putative	23	11246000	11587000	11687000	1.15067e+07	723
LINF_350035100-T1-p1	LINF_350035100-T1-p1	chaperone protein DNAj - putative	16	10754000	11138000	12585000	1.14923e+07	724
LINF_320008600-T1-p1	LINF_320008600-T1-p1	hypothetical protein - conserved	14	11788000	11716000	10936000	11480000	725
LINF_320007800-T1-p1	LINF_320007800-T1-p1	hypothetical protein - conserved	18	11148000	10624000	12606000	1.14593e+07	726
LINF_150010300-T1-p1	LINF_150010300-T1-p1;LINF_150010000-T1-p1;LINF_150010200-T1-p1;LINF_150009900-T1-p1;LINF_150010100-T1-p1;LINF_150010400-T1-p1	tb-292 membrane associated protein-like protein	24	11850000	10709000	11804000	1.14543e+07	727
LINF_270023800-T1-p1	LINF_270023800-T1-p1	hypothetical protein - conserved	20	11563000	11145000	11627000	11445000	728
LINF_200009700-T1-p1	LINF_200009700-T1-p1	glycerol-3-phosphate dehydrogenase-like protein	2	10886000	10879000	12561000	11442000	729
LINF_340033000-T1-p1	LINF_340033000-T1-p1	RNA recognition motif. (a.k.a. RRM - RBD - or RNP domain)/RNA recognition motif (a.k.a. RRM - RBD - or RNP domain) - putative | tr	10	11401000	11475000	11393000	11423000	730
LINF_190007800-T1-p1	LINF_190007800-T1-p1	RNA binding protein - putative	12	11226000	11767000	11225000	11406000	731
LINF_260009700-T1-p1	LINF_260009700-T1-p1	hypothetical protein - conserved	15	11071000	11544000	11582000	11399000	732
LINF_090019000-T1-p1	LINF_090019000-T1-p1	hypothetical protein - conserved	10	10903000	11293000	11943000	1.13797e+07	733
LINF_150022500-T1-p1	LINF_150022500-T1-p1	glutaminyl-tRNA synthetase - putative	22	11527000	11906000	10631000	1.13547e+07	734
LINF_320010500-T1-p1	LINF_320010500-T1-p1	profilin - putative	6	9792400	13141000	11095000	11342800	735
LINF_260032200-T1-p1	LINF_260032200-T1-p1	hypothetical protein - conserved	12	10744000	11155000	11921000	1.12733e+07	736
LINF_070016600-T1-p1	LINF_070016600-T1-p1	peptidyl-prolyl cis-trans isomerase/rotamase - putative	6	9274300	14612000	9924100	1.12701e+07	737
LINF_350052900-T1-p1	LINF_350052900-T1-p1	Hsp70 protein - putative	24	11170000	11352000	11281000	1.12677e+07	738
LINF_120009000-T1-p1	LINF_120009000-T1-p1	hypothetical protein - conserved	13	11660000	11095000	11001000	11252000	739
LINF_360029600-T1-p1	LINF_360029600-T1-p1	developmentally regulated GTP-binding protein 1 - putative	14	10192000	12508000	11034000	1.12447e+07	740
LINF_350056200-T1-p1	LINF_350056200-T1-p1	hypothetical protein - conserved	5	11438000	11072000	11111000	11207000	741
LINF_170008100-T1-p1	LINF_170008100-T1-p1	Tetratricopeptide repeat - putative	13	10899000	12892000	9812200	1.12011e+07	742
LINF_310028200-T1-p1	LINF_310028200-T1-p1;LINF_310026700-T1-p1	peptidase m20/m25/m40 family-like protein	14	10336000	10947000	12287000	11190000	743
LINF_080009800-T1-p1	LINF_080009800-T1-p1	small ubiquitin protein - putative	4	10379000	12320000	10815000	1.11713e+07	744
LINF_280033500-T1-p1	LINF_280033500-T1-p1	Coatomer subunit gamma	38	10686000	11145000	11673000	11168000	745
LINF_340037200-T1-p1	LINF_340037200-T1-p1	Cytochrome b5-like Heme/Steroid binding domain containing protein - putative	5	11193000	11549000	10761000	1.11677e+07	746
LINF_290033300-T1-p1	LINF_290033300-T1-p1	RNA polymerase-associated protein CTR9 - putative	11	10321000	11881000	11282000	1.11613e+07	747
LINF_280036800-T1-p1	LINF_280036800-T1-p1	cytosolic malate dehydrogenase	17	10925000	11874000	10555000	11118000	748
LINF_300013900-T1-p1	LINF_300013900-T1-p1	Prefoldin subunit - putative	5	11100000	12165000	10086000	11117000	749
LINF_210013800-T1-p1	LINF_210013800-T1-p1	Domain of unknown function (DUF3819)/CCR4-Not complex component - Not1 - putative	76	10936000	10898000	11453000	1.10957e+07	750
LINF_330026000-T1-p1	LINF_330026000-T1-p1	macrophage migration inhibitory factor-like protein	6	11412000	11252000	10610000	1.10913e+07	751
LINF_120011900-T1-p1	LINF_120011900-T1-p1	cytochrome oxidase subunit IV - putative	14	11705000	10322000	11221000	1.10827e+07	752
LINF_360063100-T1-p1	LINF_360063100-T1-p1	ubiquinone biosynthesis methyltransferase - putative	13	11573000	10254000	11375000	1.10673e+07	753
LINF_330023500-T1-p1	LINF_330023500-T1-p1	PRA1 family protein - putative	3	10621000	11943000	10616000	11060000	754
LINF_320015200-T1-p1	LINF_320015200-T1-p1	ubiquitin-conjugating enzyme protein - putative	8	11688000	9828800	11581000	11032600	755
LINF_130012200-T1-p1	LINF_130012200-T1-p1	ubiquitin-like protein	14	11717000	10922000	10417000	1.10187e+07	756
LINF_240014600-T1-p1	LINF_240014600-T1-p1	Archaic Translocase of outer membrane 14 kDa subunit - putative	7	10859000	10766000	11363000	10996000	757
LINF_340028800-T1-p1	LINF_340028800-T1-p1	asparaginyl-tRNA synthetase - putative	21	10526000	11512000	10938000	10992000	758
LINF_320024300-T1-p1	LINF_320024300-T1-p1	chaperonin HSP60 - mitochondrial precursor	21	10585000	10923000	11420000	10976000	759
LINF_220016600-T1-p1	LINF_220016600-T1-p1	small nuclear ribonucleoprotein - putative	6	10103000	10153000	12666000	10974000	760
LINF_200019300-T1-p1	LINF_200019300-T1-p1	paralyzed flagella protein 16	19	11332000	10331000	11252000	1.09717e+07	761
LINF_330024700-T1-p1	LINF_330024700-T1-p1	cyclophilin 4 - putative	8	11334000	10931000	10600000	10955000	762
LINF_360014600-T1-p1	LINF_360014600-T1-p1	eukaryotic translation initiation factor 6 (eIF-6) - putative	9	10646000	11457000	10712000	1.09383e+07	763
LINF_110017200-T1-p1	LINF_110017200-T1-p1	sterol 14-alpha-demethylase - putative	21	10565000	11106000	11132000	1.09343e+07	764
LINF_130006500-T1-p1	LINF_130006500-T1-p1	protein kinase A regulatory subunit	20	10315000	10966000	11323000	10868000	765
LINF_350053700-T1-p1	LINF_350053700-T1-p1	BRCA1 C Terminus (BRCT) domain containing protein - putative	12	11303000	10278000	10976000	1.08523e+07	766
LINF_180007200-T1-p1	LINF_180007200-T1-p1	RNA-binding protein 29 - putative	6	10900000	13086000	8541000	1.08423e+07	767
LINF_190021900-T1-p1	LINF_190021900-T1-p1	WD domain - G-beta repeat - putative	12	10037000	11647000	10837000	1.08403e+07	768
LINF_330042200-T1-p1	LINF_330042200-T1-p1	beta prime cop protein - putative	36	10490000	11212000	10783000	1.08283e+07	769
LINF_110018100-T1-p1	LINF_110018100-T1-p1	SKP1-like protein	9	12700000	11079000	8630700	1.08032e+07	770
LINF_150008000-T1-p1	LINF_150008000-T1-p1	replication Factor A 28 kDa subunit - putative	7	10785000	11984000	9595900	10788300	771
LINF_090019500-T1-p1	LINF_090019500-T1-p1	AAA family ATPase - putative	14	10879000	10778000	10699000	1.07853e+07	772
LINF_310031600-T1-p1	LINF_310031600-T1-p1	p-nitrophenylphosphatase - putative	15	10474000	11465000	10297000	1.07453e+07	773
LINF_110014400-T1-p1	LINF_110014400-T1-p1	START domain containing protein - putative	10	10419000	10589000	11108000	1.07053e+07	774
LINF_300021700-T1-p1	LINF_300021700-T1-p1	CRAL/TRIO - N-terminal domain/CRAL/TRIO domain containing protein - putative	8	10794000	10505000	10802000	1.07003e+07	775
LINF_310040600-T1-p1	LINF_310040600-T1-p1	hypothetical protein - conserved	12	10819000	10289000	10982000	1.06967e+07	776
LINF_100018900-T1-p1	LINF_100018900-T1-p1	Ras-related protein RabX1 - putative	9	9492000	11952000	10553000	1.06657e+07	777
LINF_060017500-T1-p1	LINF_060017500-T1-p1	nuclear transport factor 2 protein - putative	4	11137000	10180000	10593000	1.06367e+07	778
LINF_070018000-T1-p1	LINF_070018000-T1-p1	proteasome regulatory non-ATP-ase subunit - putative	6	11041000	9932000	10918000	1.06303e+07	779
LINF_090016900-T1-p1	LINF_090016900-T1-p1	hypothetical protein - conserved	22	10273000	10708000	10813000	10598000	780
LINF_130009900-T1-p1	LINF_130009900-T1-p1	ATP-dependent RNA helicase - putative	51	10203000	10393000	11142000	1.05793e+07	781
LINF_350052700-T1-p1	LINF_350052700-T1-p1	PACRGB	11	10432000	11138000	10088000	1.05527e+07	782
LINF_200011000-T1-p1	LINF_200011000-T1-p1	cytidine triphosphate synthase - putative	18	10117000	10482000	11024000	10541000	783
LINF_250012700-T1-p1	LINF_250012700-T1-p1	hypothetical protein - conserved	10	10985000	10351000	10116000	10484000	784
LINF_140009200-T1-p1	LINF_140009200-T1-p1;LINF_140009100-T1-p1;LINF_140009000-T1-p1;LINF_140008900-T1-p1	hypothetical protein - conserved	7	10297000	10653000	10397000	10449000	785
LINF_270010200-T1-p1	LINF_270010200-T1-p1	calpain-like cysteine peptidase - putative	170	10599000	10278000	10363000	1.04133e+07	786
LINF_170009100-T1-p1	LINF_170009100-T1-p1;REV__LINF_330016600-T1-p1	histone H2A - putative	5	10355000	11025000	9760700	1.03802e+07	787
LINF_090017900-T1-p1	LINF_090017900-T1-p1	MSP (Major sperm protein) domain containing protein - putative	6	10369000	10858000	9879900	1.0369e+07	788
LINF_330026900-T1-p1	LINF_330026900-T1-p1	small GTP-binding protein Rab18 - putative	7	9415600	10996000	10666000	10359200	789
LINF_300011400-T1-p1	LINF_300011400-T1-p1	histidyl-tRNA synthetase - putative	22	10256000	10176000	10615000	10349000	790
LINF_280028400-T1-p1	LINF_280028400-T1-p1	Mitochondrial import receptor subunit ATOM69 - putative	28	10308000	10427000	10295000	1.03433e+07	791
LINF_060015300-T1-p1	LINF_060015300-T1-p1	cell cycle associated protein MOB1 - putative	1	11350000	10926000	8703300	1.03264e+07	792
LINF_260016900-T1-p1	LINF_260016900-T1-p1	hypothetical protein - conserved	4	11931000	10532000	8468200	10310400	793
LINF_180011900-T1-p1	LINF_180011900-T1-p1	HEAT repeats/HEAT repeat - putative	22	10219000	10411000	10184000	1.02713e+07	794
LINF_190011900-T1-p1	LINF_190011900-T1-p1	kinesin - putative	8	10501000	10208000	9999500	1.02362e+07	795
LINF_340011100-T1-p1	LINF_340011100-T1-p1	leucine-rich repeat protein - putative	10	10329000	10070000	10298000	1.02323e+07	796
LINF_180019600-T1-p1	LINF_180019600-T1-p1	pumilio protein 2 - putative	13	11092000	9544400	10049000	1.02285e+07	797
LINF_330019100-T1-p1	LINF_330019100-T1-p1	pumilio protein 6 - putative	17	6708600	12470000	11503000	10227200	798
LINF_170014900-T1-p1	LINF_170014900-T1-p1	ysine decarboxylase-like protein	15	10169000	10059000	10438000	10222000	799
LINF_180022300-T1-p1	LINF_180022300-T1-p1	gamma-glutamylcysteine synthetase - putative	28	9812700	10014000	10804000	1.02102e+07	800
LINF_240006100-T1-p1	LINF_240006100-T1-p1	ankyrin/TPR repeat protein	10	9451900	10363000	10768000	10194300	801
LINF_360061000-T1-p1	LINF_360061000-T1-p1	kinesin-like protein - putative	26	10148000	10593000	9833300	1.01914e+07	802
LINF_320045900-T1-p1	LINF_320045900-T1-p1	Unconventional myosin	40	9993200	10011000	10524000	1.01761e+07	803
LINF_260025300-T1-p1	LINF_260025300-T1-p1	Methyltransferase domain containing protein - putative	16	9959500	10168000	10256000	1.01278e+07	804
LINF_300038800-T1-p1	LINF_300038800-T1-p1	MORN repeat-containing protein 1	16	10269000	10621000	9390900	1.00936e+07	805
LINF_330042000-T1-p1	LINF_330042000-T1-p1	small nuclear ribonucleoprotein SmD2	5	9022100	10405000	10807000	1.0078e+07	806
LINF_070008100-T1-p1	LINF_070008100-T1-p1	Uncharacterised protein family (UPF0172) - putative	7	10374000	9394400	10417000	10061800	807
LINF_290005500-T1-p1	LINF_290005500-T1-p1	tryptophanyl-tRNA synthetase - putative	14	9697000	10047000	10413000	1.00523e+07	808
LINF_360046700-T1-p1	LINF_360046700-T1-p1	MORN repeat - putative	9	9351200	11020000	9697000	1.00227e+07	809
LINF_300011300-T1-p1	LINF_300011300-T1-p1	ribosome biogenesis regulatory protein (RRS1) - putative	5	9041800	9030000	11907000	9.99293e+06	810
LINF_300038700-T1-p1	LINF_300038700-T1-p1	UV excision repair RAD23-like protein	7	9388700	10815000	9684800	9.96283e+06	811
LINF_310007000-T1-p1	LINF_310007000-T1-p1	nucleolar protein - putative	11	9157200	10929000	9718800	9935000	812
LINF_310016600-T1-p1	LINF_310016600-T1-p1	hypothetical protein - conserved	14	10058000	10520000	9225400	9.93447e+06	813
LINF_270021500-T1-p1	LINF_270021500-T1-p1	proteasome regulatory non-ATP-ase subunit 3 - putative	9	9104200	10442000	10193000	9.91307e+06	814
LINF_260023900-T1-p1	LINF_260023900-T1-p1	hypothetical protein - conserved	12	10126000	9832800	9685900	9.88157e+06	815
LINF_210017400-T1-p1	LINF_210017400-T1-p1	intraflagellar transport protein 172 - putative	46	9919200	9683000	10033000	9878400	816
LINF_280029300-T1-p1	LINF_280029300-T1-p1	glycosomal membrane protein-like protein	5	9062500	10240000	10313000	9.87183e+06	817
LINF_300034400-T1-p1	LINF_300034400-T1-p1	aldehyde dehydrogenase - putative	20	9663400	9471700	10472000	9.86903e+06	818
LINF_270033000-T1-p1	LINF_270033000-T1-p1	WD-repeat protein	14	9566800	9553200	10462000	9.86067e+06	819
LINF_260025100-T1-p1	LINF_260025100-T1-p1	hypothetical protein - conserved	7	9797800	11516000	8262700	9.85883e+06	820
LINF_240009000-T1-p1	LINF_240009000-T1-p1	ubiquitin carboxyl-terminal hydrolase - putative	14	9176600	9091800	11290000	9852800	821
LINF_310040300-T1-p1	LINF_310040300-T1-p1	methylcrotonoyl-coa carboxylase biotinylated subunitprotein-like protein	17	10518000	9845400	9177900	9847100	822
LINF_060019000-T1-p1	LINF_060019000-T1-p1	protoporphyrinogen oxidase-like protein	11	9779200	9734300	9935400	9816300	823
LINF_230011000-T1-p1	LINF_230011000-T1-p1	hypothetical protein - conserved	24	9947900	9703900	9785700	9812500	824
LINF_080008000-T1-p1	LINF_080008000-T1-p1	Isochorismatase family - putative	2	9166600	9854500	10316000	9.77903e+06	825
LINF_360053800-T1-p1	LINF_360053800-T1-p1	mitochondrial intermediate peptidase - putative	21	8895100	9640100	10787000	9.77407e+06	826
LINF_090022500-T1-p1	LINF_090022500-T1-p1	cytochrome b5-like protein - putative	5	9739300	9829900	9735000	9.76807e+06	827
LINF_190008000-T1-p1	LINF_190008000-T1-p1	membrane protein - putative	3	10067000	9457100	9729300	9.75113e+06	828
LINF_230013200-T1-p1	LINF_230013200-T1-p1	kinesin - putative	24	9544000	10098000	9572300	9738100	829
LINF_310034600-T1-p1	LINF_310034600-T1-p1	acetoin dehydrogenase e3 component-like protein	21	9633000	10013000	9538100	9.72803e+06	830
LINF_110005600-T1-p1	LINF_110005600-T1-p1	GRIP domain containing protein - putative	13	9826800	9689300	9665000	9.72703e+06	831
LINF_120007300-T1-p1	LINF_120007300-T1-p1	glyoxalase II - putative	8	9883100	9943700	9322600	9.71647e+06	832
LINF_360043300-T1-p1	LINF_360043300-T1-p1	2-oxoglutarate dehydrogenase subunit - putative	36	9379700	9929400	9781200	9.69677e+06	833
LINF_350042600-T1-p1	LINF_350042600-T1-p1	hypothetical protein - conserved	13	9826100	10063000	9171900	9687000	834
LINF_300042400-T1-p1	LINF_300042400-T1-p1	V-type ATPase - C subunit - putative	2	10978000	10292000	7786900	9.68563e+06	835
LINF_320007400-T1-p1	LINF_320007400-T1-p1	dynein light chain - flagellar outer arm - putative	3	13678000	7869800	7401000	9649600	836
LINF_200022000-T1-p1	LINF_200022000-T1-p1	amidohydrolase - putative	11	9664100	9204000	10027000	9631700	837
LINF_240008500-T1-p1	LINF_240008500-T1-p1	aspartate aminotransferase - putative	17	9400900	9832800	9646100	9626600	838
LINF_290029600-T1-p1	LINF_290029600-T1-p1	hypothetical protein - conserved	17	9417400	9554500	9798800	9.59023e+06	839
LINF_010011600-T1-p1	LINF_010011600-T1-p1	metallo-peptidase - Clan ME - Family M16	15	9032800	9441900	10238000	9570900	840
LINF_200018700-T1-p1	LINF_200018700-T1-p1	coatomer beta subunit - putative	26	9046400	9281900	10384000	9.57077e+06	841
LINF_350005600-T1-p1	LINF_350005600-T1-p1	2-oxoisovalerate dehydrogenase beta subunit - mitochondrial precursor - putative	10	9276900	9846300	9576900	9566700	842
LINF_360011600-T1-p1	LINF_360011600-T1-p1;LINF_140019100-T1-p1	ubiquitin/ribosomal protein S27a - putative	3	9084800	9690900	9894700	9556800	843
LINF_250021900-T1-p1	LINF_250021900-T1-p1	mitochondrial RNA binding complex 1 subunit - putative	20	9730400	9321700	9614900	9.55567e+06	844
LINF_160017700-T1-p1	LINF_160017700-T1-p1	Domain of unknown function DUF221 - putative	4	9489400	9941300	9171000	9533900	845
LINF_360005200-T1-p1	LINF_360005200-T1-p1	hypothetical protein - conserved	8	10000000	8891100	9674800	9.52197e+06	846
LINF_140021300-T1-p1	LINF_140021300-T1-p1	glutathione-S-transferase/glutaredoxin - putative	15	9397200	9574400	9567500	9.51303e+06	847
LINF_340044900-T1-p1	LINF_340044900-T1-p1	serine palmitoyltransferase-like protein	10	9417600	9014700	10075000	9.50243e+06	848
LINF_350045300-T1-p1	LINF_350045300-T1-p1	4E-interacting protein - putative	6	9703000	9763400	8950900	9.47243e+06	849
LINF_330036700-T1-p1	LINF_330036700-T1-p1	translation initiation factor IF-2 - putative	19	9514600	9255100	9619700	9.46313e+06	850
LINF_290014900-T1-p1	LINF_290014900-T1-p1	LETM1 and EF-hand domain-containing protein 1 - putative	19	9771200	9548300	9063700	9.46107e+06	851
LINF_160006500-T1-p1	LINF_160006500-T1-p1	eukaryotic translation initiation factor 1A - putative	7	9432400	9808800	9117600	9.45293e+06	852
LINF_360055000-T1-p1	LINF_360055000-T1-p1	PSP1 C-terminal conserved region containing protein - putative	11	9590700	9519800	9116300	9.40893e+06	853
LINF_100011200-T1-p1	LINF_100011200-T1-p1	GP63 - leishmanolysin	5	9328700	10304000	8481600	9.37143e+06	854
LINF_100018400-T1-p1	LINF_100018400-T1-p1	PAB1-binding protein - putative	13	9794000	9885200	8351800	9.34367e+06	855
LINF_180010600-T1-p1	LINF_180010600-T1-p1	vacuolar ATP synthase subunit c - putative	14	9521200	9706800	8722600	9.31687e+06	856
LINF_210016600-T1-p1	LINF_210016600-T1-p1	Aminoacyl-tRNA editing domain containing protein - putative	12	8839000	9414000	9556100	9269700	857
LINF_340050900-T1-p1	LINF_340050900-T1-p1	coatomer alpha subunit - putative	44	8584900	9364400	9831000	9260100	858
LINF_340007200-T1-p1	LINF_340007200-T1-p1	CS domain containing protein - putative	4	9156500	9590100	9013300	9253300	859
LINF_280019500-T1-p1	LINF_280019500-T1-p1	haloacid dehalogenase-like hydrolase - putative	11	8855800	9572700	9295400	9241300	860
LINF_310018600-T1-p1	LINF_310018600-T1-p1	Protein of unknown function (DUF3638)/Protein of unknown function (DUF3645)/Zn-finger in Ran binding protein and others - putative	110	9218600	8835100	9639500	9.23107e+06	861
LINF_210015000-T1-p1	LINF_210015000-T1-p1	xanthine phosphoribosyltransferase	8	8570200	8823400	10234000	9209200	862
LINF_270026100-T1-p1	LINF_270026100-T1-p1	hypothetical protein - conserved	3	10082000	10118000	7396700	9198900	863
LINF_150019300-T1-p1	LINF_150019300-T1-p1	Cyclic nucleotide-binding domain containing protein - putative	29	8647700	9821600	9026800	9.16537e+06	864
LINF_070010000-T1-p1	LINF_070010000-T1-p1	acyl-CoA dehydrogenase - mitochondrial precursor - putative	17	9270500	9205000	8908000	9.12783e+06	865
LINF_360053500-T1-p1	LINF_360053500-T1-p1;LINF_360041100-T1-p1	60S ribosomal protein L22 - putative	2	12561000	9103000	5659600	9.10787e+06	866
LINF_280007000-T1-p1	LINF_280007000-T1-p1	histone H2B variant	4	9475800	8991100	8853100	9.10667e+06	867
LINF_300010700-T1-p1	LINF_300010700-T1-p1	hypothetical protein - conserved	12	8902700	8952900	9461000	9.10553e+06	868
LINF_350049600-T1-p1	LINF_350049600-T1-p1	hypothetical protein - conserved	4	9537700	8881400	8840000	9.08637e+06	869
LINF_290009000-T1-p1	LINF_290009000-T1-p1	RNA polymerase Rpb4 - putative	5	8743500	8466300	10047000	9085600	870
LINF_360048900-T1-p1	LINF_360048900-T1-p1	hslVU complex proteolytic subunit - threonine peptidase - Clan T(1) - family T1B	5	11478000	8847600	6916800	9080800	871
LINF_090022300-T1-p1	LINF_090022300-T1-p1	Rhodanese-like domain containing protein - putative	5	10339000	8388800	8400500	9.04277e+06	872
LINF_030011900-T1-p1	LINF_030011900-T1-p1	DEAD/DEAH box helicase/Type III restriction enzyme - res subunit - putative	68	8734700	9023700	9363100	9040500	873
LINF_210012700-T1-p1	LINF_210012700-T1-p1	ATP-binding cassette protein subfamily E - member 1 - putative	17	8649100	8743600	9701600	9.03143e+06	874
LINF_340019600-T1-p1	LINF_340019600-T1-p1	PTP1-interacting protein - 39 kDa - putative	13	9301500	8766700	9023300	9030500	875
LINF_320040500-T1-p1	LINF_320040500-T1-p1	chaperone protein DNAj - putative	12	9198900	9093600	8697600	8996700	876
LINF_210014900-T1-p1	LINF_210014900-T1-p1	hypoxanthine-guanine phosphoribosyltransferase	7	8187500	8272600	10526000	8.99537e+06	877
LINF_240012200-T1-p1	LINF_240012200-T1-p1	mitochondrial translocase subunit - putative	4	9782000	10031000	7131200	8981400	878
LINF_300039500-T1-p1	LINF_300039500-T1-p1	PAS-domain containing phosphoglycerate kinase - putative	21	9100200	8915700	8923800	8979900	879
LINF_340006600-T1-p1	LINF_340006600-T1-p1	mitochondrial malate dehydrogenase	5	9693100	8937400	8286100	8972200	880
LINF_140016000-T1-p1	LINF_140016000-T1-p1	ADP/ATP mitochondrial carrier-like protein	12	9332600	8469400	9108500	8.97017e+06	881
LINF_320036950-T1-p1	LINF_320036950-T1-p1	tubulin binding cofactor A-like protein	4	10796000	9824500	6266700	8962400	882
LINF_320013800-T1-p1	LINF_320013800-T1-p1	hypothetical protein - conserved	6	8309900	9361000	9214400	8.96177e+06	883
LINF_030010800-T1-p1	LINF_030010800-T1-p1	arginine N-methyltransferase - putative	16	8389400	8968300	9452500	8.93673e+06	884
LINF_360021400-T1-p1	LINF_360021400-T1-p1	serine/threonine protein kinase - putative	20	8595500	8921500	9094300	8.87043e+06	885
LINF_340045900-T1-p1	LINF_340045900-T1-p1	TPR repeat - putative	9	8928300	8913000	8728600	8.85663e+06	886
LINF_290033600-T1-p1	LINF_290033600-T1-p1	hypothetical protein - conserved	14	9093300	8877900	8552000	8.84107e+06	887
LINF_350054200-T1-p1	LINF_350054200-T1-p1	Archaic translocase outer mitochondrial membrane 40 - putative	13	8668400	8296400	9531300	8.83203e+06	888
LINF_310023500-T1-p1	LINF_310023500-T1-p1	Protein of unknown function DUF84 - putative	6	9044300	8830700	8597200	8.82407e+06	889
LINF_360047000-T1-p1	LINF_360047000-T1-p1;LINF_360046900-T1-p1	aminomethyltransferase - mitochondrial - putative	13	8591800	9157600	8620200	8.78987e+06	890
LINF_300042600-T1-p1	LINF_300042600-T1-p1	hypothetical protein - conserved	24	8737100	8991100	8569300	8.76583e+06	891
LINF_230020500-T1-p1	LINF_230020500-T1-p1	coronin - putative	15	8922200	8469400	8892200	8.76127e+06	892
LINF_220005800-T1-p1	LINF_220005800-T1-p1	heat shock protein DNAJ - putative	7	8839500	8749700	8688600	8.75927e+06	893
LINF_330015600-T1-p1	LINF_330015600-T1-p1	2 -4-dienoyl-coa reductase fadh1 - putative	24	8980000	8451700	8845200	8.75897e+06	894
LINF_360069100-T1-p1	LINF_360069100-T1-p1	kinetoplast DNA-associated protein - putative	5	8826300	8657100	8743700	8.74237e+06	895
LINF_310023400-T1-p1	LINF_310023400-T1-p1	diphthine synthase-like protein	8	9447200	7893700	8641200	8660700	896
LINF_260033000-T1-p1	LINF_260033000-T1-p1	glutamate 5-kinase - putative	9	8446800	8672100	8825700	8648200	897
LINF_190005100-T1-p1	LINF_190005100-T1-p1	hypothetical protein - conserved	12	8972700	8545300	8407800	8.64193e+06	898
LINF_350046600-T1-p1	LINF_350046600-T1-p1	Splicing factor 3B subunit 10 (SF3b10) - putative	2	9278300	8390300	8212200	8.62693e+06	899
LINF_170021400-T1-p1	LINF_170021400-T1-p1	otubain cysteine peptidase - Clan CA - family C65 - putative	10	8770000	8132700	8905300	8.60267e+06	900
LINF_180006500-T1-p1	LINF_180006500-T1-p1	serine/threonine protein phosphatase type 5 - putative	19	8837100	8783100	8157200	8.59247e+06	901
LINF_070009000-T1-p1	LINF_070009000-T1-p1	Protein of unknown function (DUF1674) - putative	3	8652000	8695500	8383100	8.57687e+06	902
LINF_350050400-T1-p1	LINF_350050400-T1-p1	sm-f snRNP core complex protein - putative	4	8866000	8354900	8457100	8.55933e+06	903
LINF_360055900-T1-p1	LINF_360055900-T1-p1	60S acidic ribosomal protein - putative	10	8327800	9050700	8279200	8.55257e+06	904
LINF_260016000-T1-p1	LINF_260016000-T1-p1	hypothetical protein - conserved	3	8314500	8969500	8361000	8.54833e+06	905
LINF_190012900-T1-p1	LINF_190012900-T1-p1	ABC transport system ATP-binding protein - putative	16	8256000	8738600	8648100	8.54757e+06	906
LINF_340040800-T1-p1	LINF_340040800-T1-p1	aldose 1-epimerase-like protein	13	8371000	8541400	8643400	8518600	907
LINF_360044000-T1-p1	LINF_360044000-T1-p1	Domain of unknown function (DUF3846)/TPR repeat - putative	12	8081200	9104000	8202500	8.46257e+06	908
LINF_190011200-T1-p1	LINF_190011200-T1-p1	histone H3 variant - putative	3	7807300	8546600	8934600	8429500	909
LINF_360008300-T1-p1	LINF_360008300-T1-p1	dolicholphosphate-mannose synthase - putative	9	8008000	8626600	8653600	8429400	910
LINF_320022600-T1-p1	LINF_320022600-T1-p1	protein phosphatase 2C - putative	4	7762900	10753000	6750400	8422100	911
LINF_210014100-T1-p1	LINF_210014100-T1-p1	Temperature dependent protein affecting M2 dsRNA replication - putative	20	8295300	7976500	8985200	8419000	912
LINF_240010000-T1-p1	LINF_240010000-T1-p1	DNAJ domain protein - putative	15	8318100	8173200	8716300	8.40253e+06	913
LINF_350039800-T1-p1	LINF_350039800-T1-p1	Replication factor A protein 3 - putative	5	8324900	8326500	8543700	8.39837e+06	914
LINF_310015600-T1-p1	LINF_310015600-T1-p1;LINF_310015400-T1-p1;LINF_310015200-T1-p1;LINF_310015000-T1-p1	sodium stibogluconate resistance protein - putative	14	7983100	8277300	8915000	8391800	915
LINF_320044900-T1-p1	LINF_320044900-T1-p1	kinetoplast-associated protein p18-2 - putative	3	7657700	9638700	7841900	8.37943e+06	916
LINF_220014900-T1-p1	LINF_220014900-T1-p1	hypothetical protein - conserved	3	8471000	8555600	8042500	8.35637e+06	917
LINF_180007800-T1-p1	LINF_180007800-T1-p1	hypothetical protein - conserved	22	8313000	8111600	8621900	8.34883e+06	918
LINF_350046800-T1-p1	LINF_350046800-T1-p1	HD domain containing protein - putative	8	8919700	8159700	7949000	8342800	919
LINF_360010100-T1-p1	LINF_360010100-T1-p1	hypothetical protein - conserved	4	8903200	7991500	8109200	8.33463e+06	920
LINF_350044400-T1-p1	LINF_350044400-T1-p1	hypothetical protein - conserved	14	8073800	8390100	8505200	8.32303e+06	921
LINF_280020900-T1-p1	LINF_280020900-T1-p1	Protein of unknown function (DUF423) - putative	1	7461200	7866000	9638600	8.32193e+06	922
LINF_250025200-T1-p1	LINF_250025200-T1-p1	Not1 N-terminal domain - CCR4-Not complex component/NOT2 / NOT3 / NOT5 family - putative	11	8102000	8539700	8298700	8.31347e+06	923
LINF_230009500-T1-p1	LINF_230009500-T1-p1	aldose 1-epimerase-like protein	13	8398100	8856900	7681300	8312100	924
LINF_020012000-T1-p1	LINF_020012000-T1-p1	mitochondrial carrier protein - putative	12	7905200	8075700	8809500	8.26347e+06	925
LINF_190006200-T1-p1	LINF_190006200-T1-p1	Associated kinase of Tb14-3-3 - putative	14	8040400	8419800	8251300	8.23717e+06	926
LINF_350022600-T1-p1	LINF_350022600-T1-p1	Proteasome complex subunit Rpn13 ubiquitin receptor - putative	12	8466000	8341500	7899700	8.23573e+06	927
LINF_350042300-T1-p1	LINF_350042300-T1-p1	Peroxisomal biogenesis factor 11 (PEX11) - putative	10	7403900	8688000	8599200	8.23037e+06	928
LINF_350029700-T1-p1	LINF_350029700-T1-p1	Fumarylacetoacetate (FAA) hydrolase family - putative	7	8164700	7775500	8732900	8.22437e+06	929
LINF_230013100-T1-p1	LINF_230013100-T1-p1	ubiquitin-activating enzyme E1 - putative	35	8166700	8586500	7861400	8.20487e+06	930
LINF_180016700-T1-p1	LINF_180016700-T1-p1	Ras-related protein Rab5A - putative	11	8366200	8232300	7987900	8.19547e+06	931
LINF_110017600-T1-p1	LINF_110017600-T1-p1	protein transport protein SEC31 - putative	17	8360000	8455800	7769200	8195000	932
LINF_090011100-T1-p1	LINF_090011100-T1-p1	hypothetical protein - conserved	26	7927500	8067800	8568500	8.18793e+06	933
LINF_210009200-T1-p1	LINF_210009200-T1-p1	Protein of unknown function (DUF667) - putative	6	7826600	8905800	7823900	8.18543e+06	934
LINF_230025200-T1-p1	LINF_230025200-T1-p1	hypothetical protein	1	7250800	8121800	9163800	8178800	935
LINF_330034700-T1-p1	LINF_330034700-T1-p1	isocitrate dehydrogenase - putative	12	8217000	7751600	8548600	8172400	936
LINF_220013700-T1-p1	LINF_220013700-T1-p1	NADH-cytochrome b5 reductase - putative	9	8004500	7909400	8585100	8.16633e+06	937
LINF_360029800-T1-p1	LINF_360029800-T1-p1	hypothetical protein - conserved	16	7976000	8273500	8201300	8.15027e+06	938
LINF_290005100-T1-p1	LINF_290005100-T1-p1	transcription factor-like protein	35	7824900	8153900	8378800	8119200	939
LINF_310040700-T1-p1	LINF_310040700-T1-p1	protein kinase - putative	11	7190200	8933500	8211100	8111600	940
LINF_350023200-T1-p1	LINF_350023200-T1-p1	hypothetical protein - conserved	29	7915200	8054800	8322200	8097400	941
LINF_290035800-T1-p1	LINF_290035800-T1-p1	inosine-adenosine-guanosine-nucleosidehydrolase - putative	12	7619700	8252700	8416800	8096400	942
LINF_250012000-T1-p1	LINF_250012000-T1-p1	epsin - putative	8	8007100	8391400	7878000	8.09217e+06	943
LINF_360038800-T1-p1	LINF_360038800-T1-p1	fibrillarin	12	7714300	7881800	8673200	8.08977e+06	944
LINF_210008800-T1-p1	LINF_210008800-T1-p1	mitochondrial processing peptidase alpha subunit - putative	15	8331400	7787700	8142900	8.08733e+06	945
LINF_240005600-T1-p1	LINF_240005600-T1-p1	Zinc finger - C3HC4 type (RING finger)/Ring finger domain containing protein - putative	10	8120700	7754000	8361100	8078600	946
LINF_340049100-T1-p1	LINF_340049100-T1-p1	Protein of unknown function (DUF1620) - putative	24	7515700	7593300	9113800	8.07427e+06	947
LINF_210028400-T1-p1	LINF_210028400-T1-p1	BolA-like protein - putative	4	8316900	8738500	7153200	8.06953e+06	948
LINF_050005600-T1-p1	LINF_050005600-T1-p1	dynein light chain - putative	2	9333800	7938100	6904900	8.05893e+06	949
LINF_230010400-T1-p1	LINF_230010400-T1-p1	hypothetical protein - conserved	5	7897800	7804400	8410400	8.03753e+06	950
LINF_220006100-T1-p1	LINF_220006100-T1-p1	GMP synthase [glutamine-hydrolysing]	19	8058200	7877200	8136100	8.02383e+06	951
LINF_210022900-T1-p1	LINF_210022900-T1-p1	2-oxoisovalerate dehydrogenase alpha subunit - putative	14	7677400	7973400	8381400	8.01073e+06	952
LINF_160017600-T1-p1	LINF_160017600-T1-p1	coatomer delta subunit-like protein	9	7960200	8147200	7902600	8.00333e+06	953
LINF_180014400-T1-p1	LINF_180014400-T1-p1	hypothetical protein - conserved	2	7995300	7516100	8479600	7997000	954
LINF_280032300-T1-p1	LINF_280032300-T1-p1	acyl-CoA dehydrogenase - putative	23	7600600	8273200	8106100	7993300	955
LINF_070005600-T1-p1	LINF_070005600-T1-p1	cytochrome c1 - heme protein - mitochondrial - putative	4	8066200	8557000	7338100	7987100	956
LINF_320026000-T1-p1	LINF_320026000-T1-p1	hypothetical protein - conserved	4	7321700	9353400	7281200	7.98543e+06	957
LINF_260018100-T1-p1	LINF_260018100-T1-p1	hypothetical protein - conserved	8	8261900	7249700	8394800	7968800	958
LINF_340049000-T1-p1	LINF_340049000-T1-p1	Alpha/beta hydrolase family - putative	13	8081200	7410700	8411600	7.96783e+06	959
LINF_360050100-T1-p1	LINF_360050100-T1-p1	glycosyl hydrolase-like protein	2	8580400	10010000	5231700	7940700	960
LINF_260032700-T1-p1	LINF_260032700-T1-p1	hypothetical protein - conserved	8	7423900	8245300	8149000	7939400	961
LINF_090006100-T1-p1	LINF_090006100-T1-p1	calmodulin-like protein containing EF hand domain	25	8381200	8245600	7187300	7.93803e+06	962
LINF_310039600-T1-p1	LINF_310039600-T1-p1;LINF_310039500-T1-p1	iron/zinc transporter protein-like protein	7	10835000	8311900	4612000	7.91963e+06	963
LINF_250015700-T1-p1	LINF_250015700-T1-p1	dynein heavy chain - putative	111	7878100	7744600	8135800	7919500	964
LINF_300033800-T1-p1	LINF_300033800-T1-p1	hypothetical protein - conserved	3	9337800	7365000	7042500	7915100	965
LINF_080009200-T1-p1	LINF_080009200-T1-p1	WD domain - G-beta repeat - putative	29	7681300	7965900	7977400	7.87487e+06	966
LINF_350045500-T1-p1	LINF_350045500-T1-p1	MAP kinase kinase-like protein	31	7802000	7809500	7924600	7.84537e+06	967
LINF_120015500-T1-p1	LINF_120015500-T1-p1	NADH:flavin oxidoreductase/NADH oxidase - putative	13	7475100	8182900	7860900	7.83963e+06	968
LINF_240026500-T1-p1	LINF_240026500-T1-p1	3-oxoacyl-(acyl-carrier protein) reductase - putative	10	7620400	8126700	7741300	7.82947e+06	969
LINF_280012000-T1-p1	LINF_280012000-T1-p1	serine/threonine protein phosphatase catalytic subunit - putative	16	7578600	7926200	7975600	7826800	970
LINF_050017400-T1-p1	LINF_050017400-T1-p1	protein phosphatase type 1 regulator-like protein	22	8068700	7489400	7912600	7.82357e+06	971
LINF_200012300-T1-p1	LINF_200012300-T1-p1	conserved protein - unknown function	14	7653900	7397100	8399100	7816700	972
LINF_050011900-T1-p1	LINF_050011900-T1-p1	sre-2/carboxylate carrier-like protein	10	7718400	8068600	7619600	7802200	973
LINF_230005100-T1-p1	LINF_230005100-T1-p1	hypothetical protein - conserved	19	7809300	7712100	7871600	7.79767e+06	974
LINF_360055300-T1-p1	LINF_360055300-T1-p1	PHD-like zinc-binding domain containing protein - putative	6	8085600	8199000	7051000	7.77853e+06	975
LINF_260027800-T1-p1	LINF_260027800-T1-p1	kynureninase - putative	17	7989200	7422600	7886100	7.76597e+06	976
LINF_310033900-T1-p1	LINF_310033900-T1-p1	ubiquinol-cytochrome-c reductase-like protein	6	7369300	8170900	7735100	7.75843e+06	977
LINF_290031300-T1-p1	LINF_290031300-T1-p1	aspartyl aminopeptidase - putative	13	7022200	8138100	8103600	7.75463e+06	978
LINF_320027900-T1-p1	LINF_320027900-T1-p1	R-SNARE protein - putative	25	7508800	7904300	7835300	7.74947e+06	979
LINF_210020600-T1-p1	LINF_210020600-T1-p1	adenylate kinase - putative	16	7890400	7143900	8210400	7.74823e+06	980
LINF_110011600-T1-p1	LINF_110011600-T1-p1	3-methylcrotonoyl-CoA carboxylase beta subunit - putative	19	7613600	7295900	8260900	7.72347e+06	981
LINF_080014100-T1-p1	LINF_080014100-T1-p1	Dpy-30 motif containing protein - putative	12	8020500	8129600	7020100	7723400	982
LINF_230009200-T1-p1	LINF_230009200-T1-p1	ATP-binding cassette protein subfamily G - member 5	16	7684500	8008900	7470000	7.72113e+06	983
LINF_350029500-T1-p1	LINF_350029500-T1-p1	Autophagy-related protein 24	16	7999200	7147900	7998400	7.71517e+06	984
LINF_340022100-T1-p1	LINF_340022100-T1-p1	hypothetical protein - conserved	12	7699000	7911000	7529900	7713300	985
LINF_080007000-T1-p1	LINF_080007000-T1-p1	inositol phosphosphingolipid phospholipase C-Like	17	7582200	7805900	7745600	7.71123e+06	986
LINF_270021300-T1-p1	LINF_270021300-T1-p1;LINF_270021100-T1-p1;LINF_270020900-T1-p1	Snf7 - putative	6	7379000	8476700	7275100	7.71027e+06	987
LINF_340010000-T1-p1	LINF_340010000-T1-p1	calcium channel protein - putative	15	7702500	7864600	7560000	7.70903e+06	988
LINF_350052100-T1-p1	LINF_350052100-T1-p1	chaperone protein DNAj - putative	14	7856400	7825600	7405700	7695900	989
LINF_060017600-T1-p1	LINF_060017600-T1-p1	protein kinase - putative	12	7348100	7782000	7915400	7.68183e+06	990
LINF_320022900-T1-p1	LINF_320022900-T1-p1	DNA polymerase alpha/epsilon subunit B - putative	9	7882900	7667700	7455200	7668600	991
LINF_350041600-T1-p1	LINF_350041600-T1-p1	iron-sulfur cluster assembly protein - putative	6	7916600	8224800	6818900	7.65343e+06	992
LINF_160019600-T1-p1	LINF_160019600-T1-p1	ADP-ribosylation factor-like - putative	5	8046100	5599400	9294400	7.64663e+06	993
LINF_310039300-T1-p1	LINF_310039300-T1-p1	hypothetical protein - conserved	4	7363900	8560100	7013100	7645700	994
LINF_320037900-T1-p1	LINF_320037900-T1-p1	protein phosphatase 2A catalytic subunit - putative	14	6930400	7498800	8492400	7.64053e+06	995
LINF_340031300-T1-p1	LINF_340031300-T1-p1	C2 domain containing protein - putative	21	7541900	7941900	7417200	7.63367e+06	996
LINF_050015100-T1-p1	LINF_050015100-T1-p1	3-mercaptopyruvate sulfurtransferase	10	7596900	8103400	7199200	7.63317e+06	997
LINF_280036300-T1-p1	LINF_280036300-T1-p1	hypothetical protein - conserved	6	7744100	7147000	7938500	7.60987e+06	998
LINF_250006400-T1-p1	LINF_250006400-T1-p1	elongation factor - putative	15	7343100	7787100	7687200	7605800	999
LINF_340005700-T1-p1	LINF_340005700-T1-p1	glucose-6-phosphate 1-dehydrogenase - putative	24	7397200	7531700	7862200	7.59703e+06	1000
LINF_350011600-T1-p1	LINF_350011600-T1-p1	vacuolar ATP synthase subunit d - putative	8	7481700	7489700	7815600	7.59567e+06	1001
LINF_060014300-T1-p1	LINF_060014300-T1-p1	dihydrofolate reductase-thymidylate synthase	24	7660900	7352800	7754200	7589300	1002
LINF_300014300-T1-p1	LINF_300014300-T1-p1	amastin-like surface protein-like protein	2	8092600	8504500	6162600	7.58657e+06	1003
LINF_070017000-T1-p1	LINF_070017000-T1-p1	cation-transporting ATPase - putative	25	7268400	7711800	7775100	7585100	1004
LINF_100016500-T1-p1	LINF_100016500-T1-p1	Archaic translocase of outer membrane 12 kDa subunit - putative	4	7559100	7773900	7361200	7.56473e+06	1005
LINF_010009700-T1-p1	LINF_010009700-T1-p1	conserved protein	28	7339600	8000300	7331700	7557200	1006
LINF_070007400-T1-p1	LINF_070007400-T1-p1	hypothetical protein - conserved	14	7181800	7267200	8220100	7.55637e+06	1007
LINF_110017700-T1-p1	LINF_110017700-T1-p1	eukaryotic release factor 3 - putative	26	7518000	7950300	7179700	7.54933e+06	1008
LINF_270013700-T1-p1	LINF_270013700-T1-p1	Stress responsive A/B Barrel Domain - putative	5	7098300	7297300	8250800	7548800	1009
LINF_230008700-T1-p1	LINF_230008700-T1-p1	(H+)-ATPase G subunit - putative	5	6920900	7845000	7837500	7.53447e+06	1010
LINF_350058900-T1-p1	LINF_350058900-T1-p1	isopentenyl-diphosphate delta-isomerase (type II) - putative	15	7294200	7671700	7589000	7518300	1011
LINF_270027400-T1-p1	LINF_270027400-T1-p1	branched-chain amino acid aminotransferase - putative	11	7432900	6981800	8135500	7.51673e+06	1012
LINF_310007700-T1-p1	LINF_310007700-T1-p1	ATP-dependent RNA helicase - putative	21	7062100	7082100	8367400	7.50387e+06	1013
LINF_360031600-T1-p1	LINF_360031600-T1-p1	dipeptidyl-peptidase 8-like serine peptidase	28	7440200	7766700	7292200	7499700	1014
LINF_030010000-T1-p1	LINF_030010000-T1-p1	RNA recognition motif. (a.k.a. RRM - RBD - or RNP domain) - putative	16	8139800	6820500	7466600	7.47563e+06	1015
LINF_250025000-T1-p1	LINF_250025000-T1-p1	hypothetical protein - conserved	9	7943200	7436000	6979300	7.45283e+06	1016
LINF_200022700-T1-p1	LINF_200022700-T1-p1	CHORD - putative	14	7295400	7590700	7471100	7452400	1017
LINF_270032100-T1-p1	LINF_270032100-T1-p1	TPR-repeat protein - putative	16	7089700	7485700	7780800	7.45207e+06	1018
LINF_360017200-T1-p1	LINF_360017200-T1-p1	short chain 3-hydroxyacyl-CoA dehydrogenase - putative	7	7188100	7675300	7492500	7.45197e+06	1019
LINF_350032600-T1-p1	LINF_350032600-T1-p1	acyl-CoA dehydrogenase - putative	8	6120500	9092300	7094500	7.43577e+06	1020
LINF_140006200-T1-p1	LINF_140006200-T1-p1	inosine-guanine nucleoside hydrolase - putative	11	7039400	7277400	7987900	7434900	1021
LINF_350041000-T1-p1	LINF_350041000-T1-p1	CRAL/TRIO - N-terminal domain/CRAL/TRIO domain containing protein - putative	13	6688400	7552500	8047800	7.42957e+06	1022
LINF_350032000-T1-p1	LINF_350032000-T1-p1	Heat shock factor binding protein 1 - putative	1	9887900	8948100	3426200	7.42073e+06	1023
LINF_090012600-T1-p1	LINF_090012600-T1-p1	prefoldin subunit 2 - putative	7	6632700	7820400	7776000	7409700	1024
LINF_130013600-T1-p1	LINF_130013600-T1-p1	mitochondrial processing peptidase alpha subunit - putative	16	7366100	7448200	7399000	7.40443e+06	1025
LINF_270027600-T1-p1	LINF_270027600-T1-p1	ribonucleoside-diphosphate reductase small chain - putative	9	6799100	7536300	7875800	7.40373e+06	1026
LINF_350046300-T1-p1	LINF_350046300-T1-p1	Regulatory subunit of type II PKA R-subunit - putative	8	7507800	7496800	7175800	7.39347e+06	1027
LINF_060016500-T1-p1	LINF_060016500-T1-p1	deoxyribose-phosphate aldolase - putative	12	6874700	7332800	7947900	7.38513e+06	1028
LINF_180007000-T1-p1	LINF_180007000-T1-p1	UDP-galactopyranose mutase	9	8255700	6936600	6934900	7.37573e+06	1029
LINF_330030500-T1-p1	LINF_330030500-T1-p1	Acid Phosphatase - putative	5	7731400	6654200	7718200	7.36793e+06	1030
LINF_300013400-T1-p1	LINF_300013400-T1-p1	rac serine-threonine kinase - putative	8	7791400	7522500	6770800	7.36157e+06	1031
LINF_310037500-T1-p1	LINF_310037500-T1-p1	aldehyde reductase - putative	8	7641200	6921800	7501600	7.35487e+06	1032
LINF_250029100-T1-p1	LINF_250029100-T1-p1	Parkin co-regulated protein - putative	13	7522300	7181700	7342300	7.34877e+06	1033
LINF_340031700-T1-p1	LINF_340031700-T1-p1	hypothetical protein - conserved	12	7372600	8290700	6367600	7.34363e+06	1034
LINF_170017600-T1-p1	LINF_170017600-T1-p1	hydrolase-like protein	5	7261200	7411400	7334600	7.33573e+06	1035
LINF_330024000-T1-p1	LINF_330024000-T1-p1	ribulose-5-phosphate 3-epimerase - putative	11	7504500	6978000	7483300	7.32193e+06	1036
LINF_090014600-T1-p1	LINF_090014600-T1-p1	Uncharacterised protein family (UPF0160) - putative	8	6866600	7175200	7917300	7319700	1037
LINF_360052200-T1-p1	LINF_360052200-T1-p1	ADP-ribosylation factor family - putative	6	2209900	17929000	1816100	7.31833e+06	1038
LINF_340044100-T1-p1	LINF_340044100-T1-p1	transmembrane/endomembrane-like protein	15	6765200	8202400	6945100	7.30423e+06	1039
LINF_290006300-T1-p1	LINF_290006300-T1-p1	RNA polymerase subunit - putative	11	6998200	7483000	7430600	7.30393e+06	1040
LINF_260028200-T1-p1	LINF_260028200-T1-p1	nitrilase - putative	13	7181000	6887200	7721600	7.26327e+06	1041
LINF_300036400-T1-p1	LINF_300036400-T1-p1	homoserine kinase - putative	10	6590500	7445900	7699800	7245400	1042
LINF_340011400-T1-p1	LINF_340011400-T1-p1	hypothetical protein - conserved	7	6957500	7721000	6991800	7.22343e+06	1043
LINF_100010000-T1-p1	LINF_100010000-T1-p1	4F5 protein family/Zinc-binding - putative	3	6671900	7694300	7229900	7198700	1044
LINF_170008200-T1-p1	LINF_170008200-T1-p1	hypothetical protein - conserved	14	7507000	6805900	7272200	7.19503e+06	1045
LINF_180007700-T1-p1	LINF_180007700-T1-p1	glycogen synthase kinase 3 - putative	11	7051200	6852000	7663400	7.18887e+06	1046
LINF_300040300-T1-p1	LINF_300040300-T1-p1	hypothetical protein - conserved	11	7445700	6795400	7247700	7.16293e+06	1047
LINF_150017800-T1-p1	LINF_150017800-T1-p1	E1-like ubiquitin-activating enzyme - putative	12	6898300	7034200	7529400	7.15397e+06	1048
LINF_040005000-T1-p1	LINF_040005000-T1-p1	calcium-translocating P-type ATPase	22	6769600	7606000	7061100	7.14557e+06	1049
LINF_330008900-T1-p1	LINF_330008900-T1-p1	ATP-binding cassette sub-family F member 1 - putative	18	7090000	7046300	7261300	7.13253e+06	1050
LINF_130012000-T1-p1	LINF_130012000-T1-p1	Putative GTPase activating protein for Arf - putative	8	7160100	7431000	6796400	7.12917e+06	1051
LINF_240015500-T1-p1	LINF_240015500-T1-p1	dynein light chain - putative	8	7024300	7211000	7124700	7120000	1052
LINF_310032000-T1-p1	LINF_310032000-T1-p1	WD domain - G-beta repeat - putative	12	6809200	7641400	6905600	7.11873e+06	1053
LINF_320023200-T1-p1	LINF_320023200-T1-p1	pumilio/PUF RNA binding protein 7 - putative	19	7332500	6641500	7366000	7.11333e+06	1054
LINF_340048400-T1-p1	LINF_340048400-T1-p1	ubiquitin hydrolase - putative	22	6971600	7146200	7197800	7105200	1055
LINF_290014000-T1-p1	LINF_290014000-T1-p1	guanine deaminase - putative	15	6864800	7000100	7434900	7.09993e+06	1056
LINF_300041600-T1-p1	LINF_300041600-T1-p1	serine/threonine-protein kinase - putative	15	7018400	6711800	7565400	7.09853e+06	1057
LINF_340027200-T1-p1	LINF_340027200-T1-p1	Thioredoxin/Thioredoxin-like domain/Thioredoxin-like - putative	15	7278400	6998800	6947700	7.07497e+06	1058
LINF_300036700-T1-p1	LINF_300036700-T1-p1	S-adenosylmethionine decarboxylase	12	7151300	6752800	7308400	7.07083e+06	1059
LINF_320018500-T1-p1	LINF_320018500-T1-p1	RNA polymerase-like protein - putative	8	7116100	7149400	6931100	7.06553e+06	1060
LINF_180009600-T1-p1	LINF_180009600-T1-p1	tubulin-specific chaperone - putative	4	6971700	8030900	6184400	7.06233e+06	1061
LINF_100020800-T1-p1	LINF_100020800-T1-p1	Protein of unknown function (DUF1861) - putative	11	6307700	7156400	7604600	7022900	1062
LINF_230010700-T1-p1	LINF_230010700-T1-p1	acetyl-CoA synthetase - putative	4	7887500	7579500	5587000	7018000	1063
LINF_080013300-T1-p1	LINF_080013300-T1-p1	mitochondrial DNA polymerase beta	12	6782000	7445300	6785200	7.00417e+06	1064
LINF_230025800-T1-p1	LINF_230025800-T1-p1	vacuolar proton translocating ATPase subunit A - putative	16	7132300	7058900	6767100	6986100	1065
LINF_190011500-T1-p1	LINF_190011500-T1-p1	DNA-directed RNA polymerases I and III subunit RPAC1 - putative	15	7315200	6926000	6650600	6.96393e+06	1066
LINF_290034800-T1-p1	LINF_290034800-T1-p1	hypothetical protein - conserved	2	11065000	9666700	143172	6.95829e+06	1067
LINF_310006100-T1-p1	LINF_310006100-T1-p1	intergrin alpha chain protein - putative	6	6666100	6870600	7313300	6950000	1068
LINF_280013700-T1-p1	LINF_280013700-T1-p1	RNA binding protein rbp16 - putative	2	8135000	8002200	4660000	6932400	1069
LINF_350035500-T1-p1	LINF_350035500-T1-p1	phospholipase A1 - putative	14	6891600	6950800	6873900	6.90543e+06	1070
LINF_270023300-T1-p1	LINF_270023300-T1-p1	BRO1-like domain/ALIX V-shaped domain binding to HIV - putative	22	6654300	7013800	7034000	6900700	1071
LINF_310017800-T1-p1	LINF_310017800-T1-p1	monoglyceride lipase - putative	11	6887300	7079700	6695900	6.88763e+06	1072
LINF_090021700-T1-p1	LINF_090021700-T1-p1	Bacterial trigger factor protein (TF) C-terminus - putative	5	6821300	7005300	6822700	6883100	1073
LINF_350016500-T1-p1	LINF_350016500-T1-p1	Rhodanese-like domain containing protein - putative	3	6980800	5704000	7955000	6.87993e+06	1074
LINF_070016300-T1-p1	LINF_070016300-T1-p1	RNA binding protein-like protein	5	6602700	7305400	6689400	6.86583e+06	1075
LINF_290014300-T1-p1	LINF_290014300-T1-p1	hypothetical protein - conserved	17	6567600	7241400	6705600	6838200	1076
LINF_320029800-T1-p1	LINF_320029800-T1-p1	cytochrome-b5 reductase - putative	9	6769500	6236200	7492800	6.83283e+06	1077
LINF_310009200-T1-p1	LINF_310009200-T1-p1	calpain-like cysteine peptidase - putative	16	6713900	6346800	7417900	6826200	1078
LINF_320016300-T1-p1	LINF_320016300-T1-p1	dynein - putative	16	6768700	6712900	6978900	6.82017e+06	1079
LINF_180013000-T1-p1	LINF_180013000-T1-p1	DNA-directed RNA polymerase II/III subunit - putative	5	7365100	6436200	6636900	6.81273e+06	1080
LINF_360065600-T1-p1	LINF_360065600-T1-p1	adenylyl cyclase-associated protein - putative	9	6252200	7288700	6881000	6807300	1081
LINF_280026000-T1-p1	LINF_280026000-T1-p1	X-pro - dipeptidyl-peptidase -serine peptidase - Clan SC - family S15 - putative	23	6337300	6741200	7303300	6.79393e+06	1082
LINF_190010300-T1-p1	LINF_190010300-T1-p1	metallo- peptidase - Clan MG - Family M24	11	6278800	6533300	7567200	6793100	1083
LINF_190015700-T1-p1	LINF_190015700-T1-p1	phenylalanyl-tRNA synthetase - putative	29	6503500	7169700	6701100	6.79143e+06	1084
LINF_280018300-T1-p1	LINF_280018300-T1-p1	hypothetical protein - conserved	6	6222700	6672300	7478700	6.79123e+06	1085
LINF_010012000-T1-p1	LINF_010012000-T1-p1	PLAC8 family - putative	1	6393100	6753900	7225500	6.79083e+06	1086
LINF_360014300-T1-p1	LINF_360014300-T1-p1	mitogen-activated protein kinase kinase - putative	8	7688600	6821100	5854400	6.78803e+06	1087
LINF_120015600-T1-p1	LINF_120015600-T1-p1	n-ethylmaleimide reductase-like protein	20	6674300	6894100	6766600	6.77833e+06	1088
LINF_350054900-T1-p1	LINF_350054900-T1-p1	hypothetical protein - conserved	4	7338700	6349000	6616400	6.76803e+06	1089
LINF_360010900-T1-p1	LINF_360010900-T1-p1	ubiquitin-like protein - putative	5	6802100	7122400	6369900	6764800	1090
LINF_350019700-T1-p1	LINF_350019700-T1-p1	hypothetical protein - conserved	11	6673100	6841600	6736600	6.75043e+06	1091
LINF_350044300-T1-p1	LINF_350044300-T1-p1	calmodulin-like protein	7	6692800	6951000	6497900	6713900	1092
LINF_260007800-T1-p1	LINF_260007800-T1-p1	hypothetical protein - conserved	7	6667100	6749200	6698200	6.70483e+06	1093
LINF_260005100-T1-p1	LINF_260005100-T1-p1	brix domain containing-like protein	13	6848600	6571800	6638800	6686400	1094
LINF_320019400-T1-p1	LINF_320019400-T1-p1	G5-interacting protein - putative	16	6390000	7139600	6472300	6667300	1095
LINF_360030300-T1-p1	LINF_360030300-T1-p1	glucokinase	11	6645700	6563100	6779900	6662900	1096
LINF_040005600-T1-p1	LINF_040005600-T1-p1	hypothetical protein - conserved	17	6473000	6914000	6567700	6.65157e+06	1097
LINF_270016500-T1-p1	LINF_270016500-T1-p1	hypothetical protein - conserved	4	5787900	6614100	7540700	6.64757e+06	1098
LINF_270013600-T1-p1	LINF_270013600-T1-p1	Stress responsive A/B Barrel Domain - putative	4	6532300	6257700	7111500	6.63383e+06	1099
LINF_250010500-T1-p1	LINF_250010500-T1-p1	ABC transporter - mitochondrial - putative	18	6574500	7224700	6077900	6625700	1100
LINF_290019400-T1-p1	LINF_290019400-T1-p1;LINF_290019600-T1-p1;LINF_290019500-T1-p1	Amastin surface glycoprotein - putative	2	4866700	8326400	6680000	6.62437e+06	1101
LINF_360050700-T1-p1	LINF_360050700-T1-p1	hypothetical protein - conserved	8	6567200	6889000	6416300	6.62417e+06	1102
LINF_120005100-T1-p1	LINF_120005100-T1-p1	PITH domain-containing protein	7	6320000	6818800	6686600	6.60847e+06	1103
LINF_320006300-T1-p1	LINF_320006300-T1-p1	hypothetical protein - conserved	6	7023900	6029500	6670000	6.57447e+06	1104
LINF_210018400-T1-p1	LINF_210018400-T1-p1	cell division protein kinase 2	7	6088300	7082200	6531400	6567300	1105
LINF_280032200-T1-p1	LINF_280032200-T1-p1	eukaryotic translation initiation factor 4E - putative	13	6586800	6858100	6243300	6.56273e+06	1106
LINF_200021200-T1-p1	LINF_200021200-T1-p1	ribosome biogenesis protein - putative	7	5338400	6843200	7502800	6.56147e+06	1107
LINF_170005800-T1-p1	LINF_170005800-T1-p1	ADP-ribosylation factor-like protein 1	5	6392100	6377700	6907400	6.55907e+06	1108
LINF_140015200-T1-p1	LINF_140015200-T1-p1;LINF_320037300-T1-p1	glutathione synthetase - putative	18	6142300	6813400	6685200	6.54697e+06	1109
LINF_300011700-T1-p1	LINF_300011700-T1-p1	Phosphoinositide-specific phospholipase C - efhand-like/Phosphatidylinositol-specific phospholipase C - X domain/PDZ domain (Also	21	6397200	6535800	6694900	6.54263e+06	1110
LINF_120014400-T1-p1	LINF_120014400-T1-p1;LINF_120012800-T1-p1	hypothetical protein - conserved	8	6827300	6174000	6566800	6522700	1111
LINF_240018000-T1-p1	LINF_240018000-T1-p1;LINF_240017700-T1-p1	amastin-like surface protein-like protein	1	5814800	7433800	6310900	6.51983e+06	1112
LINF_210005500-T1-p1	LINF_210005500-T1-p1	hypothetical protein - conserved	12	6826900	6229200	6487900	6.51467e+06	1113
LINF_310013100-T1-p1	LINF_310013100-T1-p1	Tir chaperone protein (CesT) family - putative	10	5905600	6376400	7252600	6.51153e+06	1114
LINF_280007600-T1-p1	LINF_280007600-T1-p1	carbonic anhydrase-like protein	9	6202300	6770800	6531000	6.50137e+06	1115
LINF_060011800-T1-p1	LINF_060011800-T1-p1	Putative Phosphatase/Protein of unknown function DUF89 - putative	26	6276800	6305900	6898300	6.49367e+06	1116
LINF_310034200-T1-p1	LINF_310034200-T1-p1	RNA polymerase ii largest subunit	44	6691900	6280200	6503200	6.49177e+06	1117
LINF_150006600-T1-p1	LINF_150006600-T1-p1	protein phosphatase 2C - putative	12	6117500	7227600	6112200	6.48577e+06	1118
LINF_230015900-T1-p1	LINF_230015900-T1-p1	actin interacting protein-like protein	17	6200900	6679000	6551800	6.47723e+06	1119
LINF_360043200-T1-p1	LINF_360043200-T1-p1	NIPSNAP - putative	10	6174000	6269200	6976100	6473100	1120
LINF_290008100-T1-p1	LINF_290008100-T1-p1	hypothetical protein	2	5648400	8656200	5111200	6.47193e+06	1121
LINF_210013100-T1-p1	LINF_210013100-T1-p1	Domain of unknown function (DUF543) - putative	4	6045600	6892400	6464600	6.46753e+06	1122
LINF_050012500-T1-p1	LINF_050012500-T1-p1	hypothetical protein - conserved	12	6376900	6812300	6178100	6.45577e+06	1123
LINF_360060900-T1-p1	LINF_360060900-T1-p1	VHS domain containing protein - putative	12	6384000	6266200	6685200	6.44513e+06	1124
LINF_120008600-T1-p1	LINF_120008600-T1-p1	CCR4-NOT transcription complex subunit 2 - putative	7	6670000	6593400	5964600	6.40933e+06	1125
LINF_120013700-T1-p1	LINF_120013700-T1-p1	surface antigen protein 2 - putative	4	4782900	6461200	7963400	6402500	1126
LINF_300039600-T1-p1	LINF_300039600-T1-p1	CAS/CSE/importin domain protein - putative	30	6048200	6213500	6918500	6393400	1127
LINF_360057300-T1-p1	LINF_360057300-T1-p1	paraflagellar rod component - putative	11	6502900	6536000	6103500	6380800	1128
LINF_290028700-T1-p1	LINF_290028700-T1-p1	Domain of unknown function (DUF4139) - putative	13	6152400	6663900	6296400	6370900	1129
LINF_260032900-T1-p1	LINF_260032900-T1-p1	6-phosphogluconolactonase	12	5859000	6717300	6466100	6.34747e+06	1130
LINF_270008900-T1-p1	LINF_270008900-T1-p1	Nuclear pore complex protein 158	17	6428700	6350600	6260900	6.34673e+06	1131
LINF_220022300-T1-p1	LINF_220022300-T1-p1	ser/thr protein phosphatase - putative	13	6783500	5555800	6680300	6.33987e+06	1132
LINF_150015700-T1-p1	LINF_150015700-T1-p1	hypothetical protein - conserved	15	6344100	6461900	6144300	6.31677e+06	1133
LINF_050010300-T1-p1	LINF_050010300-T1-p1	nuclear receptor binding factor-like protein	6	6245300	6600700	6103900	6.31663e+06	1134
LINF_160011200-T1-p1	LINF_160011200-T1-p1	carbamoyl-phosphate synthase - putative	48	5973600	6217200	6641000	6.27727e+06	1135
LINF_240011400-T1-p1	LINF_240011400-T1-p1	Kinesin-13 3 - putative	8	6267200	6410500	6148800	6275500	1136
LINF_280034600-T1-p1	LINF_280034600-T1-p1	Uncharacterized ACR - COG1678 - putative	11	6227100	6260300	6291800	6.25973e+06	1137
LINF_100006200-T1-p1	LINF_100006200-T1-p1	hypothetical protein - conserved	14	5938400	5955500	6789700	6.22787e+06	1138
LINF_290012200-T1-p1	LINF_290012200-T1-p1	Elongation factor Ts - mitochondrial - putative	7	6386700	6163800	6096900	6215800	1139
LINF_240006200-T1-p1	LINF_240006200-T1-p1	glycosomal membrane like protein	5	6028700	5506200	7111500	6.21547e+06	1140
LINF_340040600-T1-p1	LINF_340040600-T1-p1	D-Tyr-tRNA(Tyr) deacylase - putative	8	6118400	6169600	6331800	6206600	1141
LINF_140015800-T1-p1	LINF_140015800-T1-p1	hypothetical protein - conserved	11	6035700	6040500	6536900	6.20437e+06	1142
LINF_360047400-T1-p1	LINF_360047400-T1-p1	Snf7 - putative	11	6492900	7568200	4447800	6.16963e+06	1143
LINF_350012200-T1-p1	LINF_350012200-T1-p1	AMP-activated protein kinase - gamma regulatory subunit	10	5847100	6442400	6198600	6162700	1144
LINF_160020400-T1-p1	LINF_160020400-T1-p1;LINF_160020300-T1-p1;LINF_160020200-T1-p1	paraflagellar rod protein 1D - putative	17	6275200	6711100	5467100	6.15113e+06	1145
LINF_050016100-T1-p1	LINF_050016100-T1-p1	Phosphatidylinositol 4-phosphate 5-kinase - putative	15	6104200	6032800	6245500	6127500	1146
LINF_320046100-T1-p1	LINF_320046100-T1-p1	AUT2/APG4/ATG4 cysteine peptidase - putative	6	5706600	6375700	6287900	6123400	1147
LINF_160012300-T1-p1	LINF_160012300-T1-p1	Eukaryotic translation initiation factor eIF2A - putative	13	6120600	6437200	5757200	6105000	1148
LINF_350006100-T1-p1	LINF_350006100-T1-p1	Ubiquinol-cytochrome C reductase complex 14kD subunit - putative	7	5648700	6025000	6610200	6.09463e+06	1149
LINF_130009500-T1-p1	LINF_130009500-T1-p1	hypothetical protein - conserved	9	5986600	5656900	6626800	6090100	1150
LINF_100008500-T1-p1	LINF_100008500-T1-p1	protein transport protein SEC23 - putative	15	5903900	5910000	6451000	6088300	1151
LINF_310018800-T1-p1	LINF_310018800-T1-p1	Leucine Rich repeat - putative	6	5507800	4865000	7883600	6.08547e+06	1152
LINF_250018900-T1-p1	LINF_250018900-T1-p1	Cullin family/Cullin protein neddylation domain containing protein - putative	16	5790400	6566500	5887800	6.08157e+06	1153
LINF_330018200-T1-p1	LINF_330018200-T1-p1;LINF_280015400-T1-p1	hypothetical protein - conserved	6	7148800	5430200	5655600	6078200	1154
LINF_110010500-T1-p1	LINF_110010500-T1-p1	mRNA cap guanine-N7 methyltransferase - putative	25	5948700	5649900	6616100	6.07157e+06	1155
LINF_130014900-T1-p1	LINF_130014900-T1-p1	hypothetical protein - conserved	11	5902800	6133500	6173100	6069800	1156
LINF_350038500-T1-p1	LINF_350038500-T1-p1	hypothetical protein - conserved	9	6380900	5831100	5985700	6065900	1157
LINF_360035100-T1-p1	LINF_360035100-T1-p1	transportin2-like protein	13	5627000	6416200	6133500	6058900	1158
LINF_350037000-T1-p1	LINF_350037000-T1-p1	riboflavin kinase/fmn adenylyltransferase-like protein	7	6122400	5712900	6329700	6055000	1159
LINF_300031200-T1-p1	LINF_300031200-T1-p1	RNA-binding protein - putative	4	5622000	6281700	6201200	6.03497e+06	1160
LINF_360076400-T1-p1	LINF_360076400-T1-p1	ubiquitin fusion degradation protein - putative	12	5656100	6428300	6016800	6.03373e+06	1161
LINF_120017200-T1-p1	LINF_120017200-T1-p1	MYND finger/SET domain containing protein - putative	17	5582700	6376000	6073600	6.01077e+06	1162
LINF_280024700-T1-p1	LINF_280024700-T1-p1	methylthioribulose-1-phosphate dehydratase - putative	12	5505200	6316800	6208700	6.01023e+06	1163
LINF_040009600-T1-p1	LINF_040009600-T1-p1	adenylosuccinate lyase - putative	23	5880700	6102700	6033100	6005500	1164
LINF_290018800-T1-p1	LINF_290018800-T1-p1	hypothetical protein - conserved	2	6452300	5815700	5732800	6.00027e+06	1165
LINF_150005800-T1-p1	LINF_150005800-T1-p1	ATP-dependent protease ATPase subunit HslU1 - putative	13	5497900	6096100	6393800	5.99593e+06	1166
LINF_100007100-T1-p1	LINF_100007100-T1-p1	Mitogen-activated protein kinase 10 - putative	21	5848700	5763000	6357900	5.98987e+06	1167
LINF_360042700-T1-p1	LINF_360042700-T1-p1	short chain dehydrogenase-like protein	10	5528600	5922500	6506800	5.98597e+06	1168
LINF_040014400-T1-p1	LINF_040014400-T1-p1	chaperone protein DNAj - putative	7	6024500	5863600	6022000	5.97003e+06	1169
LINF_230006400-T1-p1	LINF_230006400-T1-p1	vacuolar type h+ ATPase subunit - putative	1	6659700	6579200	4669500	5.96947e+06	1170
LINF_300014900-T1-p1	LINF_300014900-T1-p1	Domain of unknown function (DUF4139) - putative	13	5700800	5576200	6617300	5.96477e+06	1171
LINF_070011500-T1-p1	LINF_070011500-T1-p1	electron transfer flavoprotein-ubiquinone oxidoreductase - putative	16	5588400	6203000	6094600	5962000	1172
LINF_320026400-T1-p1	LINF_320026400-T1-p1	Ras-related protein RAB2B - putative	7	5328700	6620300	5907600	5952200	1173
LINF_340041100-T1-p1	LINF_340041100-T1-p1	Metallo-beta-lactamase superfamily - putative	11	6099700	6131600	5602100	5.94447e+06	1174
LINF_010010800-T1-p1	LINF_010010800-T1-p1	tricarboxylate carrier - putative	13	5575900	6159600	6073500	5.93633e+06	1175
LINF_290025700-T1-p1	LINF_290025700-T1-p1	dihydrolipoamide dehydrogenase - putative	12	5791400	6430700	5533100	5918400	1176
LINF_360073700-T1-p1	LINF_360073700-T1-p1	homocysteine S-methyltransferase - putative	12	5827200	5995100	5932100	5.91813e+06	1177
LINF_310030900-T1-p1	LINF_310030900-T1-p1	hypothetical protein - conserved	16	5914300	6194100	5616600	5.90833e+06	1178
LINF_320035200-T1-p1	LINF_320035200-T1-p1	RNA-binding protein - putative	7	5231900	6570500	5889200	5897200	1179
LINF_290006600-T1-p1	LINF_290006600-T1-p1	Protein phosphatase inhibitor 2 (IPP-2) - putative	5	6023600	6620000	4983900	5.87583e+06	1180
LINF_350028600-T1-p1	LINF_350028600-T1-p1	Importin 1	17	5217700	6391800	6000000	5.86983e+06	1181
LINF_300016700-T1-p1	LINF_300016700-T1-p1	RNA-binding protein - putative	17	5729600	5863700	6001500	5.86493e+06	1182
LINF_170015800-T1-p1	LINF_170015800-T1-p1	META domain containing protein	12	6082400	5815400	5681600	5859800	1183
LINF_010010000-T1-p1	LINF_010010000-T1-p1	long-chain-fatty-acid-CoA ligase - putative	15	5692300	6340500	5545100	5859300	1184
LINF_320017700-T1-p1	LINF_320017700-T1-p1	proteasome regulatory non-ATP-ase subunit - putative	13	5993600	5554000	6030000	5859200	1185
LINF_220022600-T1-p1	LINF_220022600-T1-p1	CCR4 associated factor - putative	10	5940500	5704400	5923900	5.85627e+06	1186
LINF_350053100-T1-p1	LINF_350053100-T1-p1	glyceraldehyde-3-phosphate dehydrogenase-like protein	4	5527700	5894000	6121300	5.84767e+06	1187
LINF_150023000-T1-p1	LINF_150023000-T1-p1	cAMP specific phosphodiesterase - putative	17	5821700	5549100	6130400	5.83373e+06	1188
LINF_290028800-T1-p1	LINF_290028800-T1-p1	UDP-glucose:Glycoprotein Glucosyltransferase - putative	39	6133900	5670400	5677100	5.82713e+06	1189
LINF_210021200-T1-p1	LINF_210021200-T1-p1	RF-1 domain containing protein - putative	14	5652700	5428900	6349000	5810200	1190
LINF_280033900-T1-p1	LINF_280033900-T1-p1	SelR domain containing protein - putative	7	5481700	6299800	5547400	5776300	1191
LINF_190007900-T1-p1	LINF_190007900-T1-p1	hypothetical protein	9	5810600	5505300	5979300	5.76507e+06	1192
LINF_310011900-T1-p1	LINF_310011900-T1-p1	hypothetical protein - conserved	6	5634700	5242000	6415800	5.76417e+06	1193
LINF_050008400-T1-p1	LINF_050008400-T1-p1	hypothetical protein - conserved	9	5722900	5772100	5715100	5736700	1194
LINF_060013000-T1-p1	LINF_060013000-T1-p1	serine-threonine dehydratase - putative	9	5385800	5807200	5993600	5.72887e+06	1195
LINF_260015000-T1-p1	LINF_260015000-T1-p1	hypothetical protein - conserved	13	5224200	5983900	5961500	5723200	1196
LINF_230007700-T1-p1	LINF_230007700-T1-p1	terbinafine resistance locus protein (yip1)	2	4563800	6575900	6025200	5.72163e+06	1197
LINF_320025300-T1-p1	LINF_320025300-T1-p1	heat shock protein-like protein - putative	11	6065900	5680200	5363500	5703200	1198
LINF_260031000-T1-p1	LINF_260031000-T1-p1	DnaJ domain containing protein - putative	6	5535700	5161000	6380000	5.69223e+06	1199
LINF_090018900-T1-p1	LINF_090018900-T1-p1	hypothetical protein - conserved	6	5576600	5880000	5619800	5.69213e+06	1200
LINF_360063500-T1-p1	LINF_360063500-T1-p1	NADH dehydrogenase - putative	21	5673700	5843100	5552300	5689700	1201
LINF_320014700-T1-p1	LINF_320014700-T1-p1	Alpha/beta hydrolase family - putative	5	5168100	5514600	6383600	5.68877e+06	1202
LINF_130021600-T1-p1	LINF_130021600-T1-p1	Kinesin-13 5 - putative	16	5648500	5699200	5644500	5.66407e+06	1203
LINF_260020300-T1-p1	LINF_260020300-T1-p1	RNA recognition motif (a.k.a. RRM - RBD - or RNP domain)/RNA recognition motif. (a.k.a. RRM - RBD - or RNP domain) - putative | tr	4	5453800	5254600	6279700	5662700	1204
LINF_330035900-T1-p1	LINF_330035900-T1-p1	hypothetical protein - conserved	7	5884800	5349400	5743000	5.65907e+06	1205
LINF_320007200-T1-p1	LINF_320007200-T1-p1	Histone chaperone Rttp106-like - putative	16	5524100	5614000	5827600	5.65523e+06	1206
LINF_330021300-T1-p1	LINF_330021300-T1-p1	glutamine aminotransferase - putative	15	5193300	5926800	5842300	5.65413e+06	1207
LINF_250010100-T1-p1	LINF_250010100-T1-p1	RNA-binding protein - putative - UPB1	1	6351800	5090900	5512400	5651700	1208
LINF_300010900-T1-p1	LINF_300010900-T1-p1	AMP-binding enzyme - putative	16	5454900	5462500	6034000	5.65047e+06	1209
LINF_320012700-T1-p1	LINF_320012700-T1-p1	hypothetical protein - conserved	16	5624000	5495800	5820700	5.64683e+06	1210
LINF_300007500-T1-p1	LINF_300007500-T1-p1	ubiquitin hydrolase - putative	21	5575300	5910800	5448100	5.64473e+06	1211
LINF_360052000-T1-p1	LINF_360052000-T1-p1	hypothetical protein - conserved	28	5546700	5404500	5952800	5.63467e+06	1212
LINF_060007900-T1-p1	LINF_060007900-T1-p1	5-3 exoribonuclease A - putative	33	5883900	5381900	5605700	5.62383e+06	1213
LINF_350036100-T1-p1	LINF_350036100-T1-p1	glycerol kinase - glycosomal - putative	24	5360100	5663000	5846800	5623300	1214
LINF_280017300-T1-p1	LINF_280017300-T1-p1	vacuolar type h+ ATPase subunit - putative	1	5532900	6133800	5199900	5622200	1215
LINF_170010400-T1-p1	LINF_170010400-T1-p1	hypothetical protein - conserved	22	5586100	5745600	5519600	5617100	1216
LINF_210012000-T1-p1	LINF_210012000-T1-p1	phosphoglucomutase - putative	20	5521900	5400300	5909700	5.61063e+06	1217
LINF_210014700-T1-p1	LINF_210014700-T1-p1	metallo-peptidase - Clan MG - Family M24	11	5636000	5502700	5692000	5.61023e+06	1218
LINF_050006700-T1-p1	LINF_050006700-T1-p1	dihydrolipoamide branched chain transacylase - putative	11	5281500	5769100	5751000	5.60053e+06	1219
LINF_140017500-T1-p1	LINF_140017500-T1-p1	kinesin K39 - putative	17	5462900	7207000	4103900	5.59127e+06	1220
LINF_080005500-T1-p1	LINF_080005500-T1-p1	phosphoglycerate mutase protein - putative	7	5470500	5865800	5416300	5584200	1221
LINF_120009300-T1-p1	LINF_120009300-T1-p1	Eukaryotic protein of unknown function (DUF866) - putative	3	5850600	5585700	5308600	5.58163e+06	1222
LINF_320008800-T1-p1	LINF_320008800-T1-p1	Dynamin family/Root hair defective 3 GTP-binding protein (RHD3) - putative	21	5368800	5264700	6107000	5.58017e+06	1223
LINF_290022500-T1-p1	LINF_290022500-T1-p1	XPC-binding domain/UBA/TS-N domain containing protein - putative	10	5486800	6060800	5191800	5579800	1224
LINF_350006400-T1-p1	LINF_350006400-T1-p1	ADP-ribosylation factor-like 2 - arl2 - putative	7	5567800	5285900	5877200	5.57697e+06	1225
LINF_350006500-T1-p1	LINF_350006500-T1-p1	hypothetical protein - conserved	8	5735700	5958600	5030600	5.57497e+06	1226
LINF_070011200-T1-p1	LINF_070011200-T1-p1	hypothetical protein - conserved	7	5588800	5736000	5389000	5.57127e+06	1227
LINF_170007800-T1-p1	LINF_170007800-T1-p1;LINF_170007700-T1-p1;LINF_170007600-T1-p1	receptor-type adenylate cyclase - putative	23	5693600	5487000	5511400	5564000	1228
LINF_330032000-T1-p1	LINF_330032000-T1-p1	udp-glc 4-epimerase - putative	16	5631000	5617000	5438100	5.56203e+06	1229
LINF_230025500-T1-p1	LINF_230025500-T1-p1	alanine racemase - putative	9	5533900	5461500	5688800	5561400	1230
LINF_220011200-T1-p1	LINF_220011200-T1-p1	rer1 family-like protein	2	6054100	4864900	5758700	5.55923e+06	1231
LINF_120016200-T1-p1	LINF_120016200-T1-p1	hypothetical protein - conserved	15	5257400	5984400	5431300	5557700	1232
LINF_350026700-T1-p1	LINF_350026700-T1-p1	short chain dehydrogenase - putative	12	5351100	5463200	5826000	5.54677e+06	1233
LINF_130011600-T1-p1	LINF_130011600-T1-p1	mannose-specific lectin - putative	15	5734500	5285500	5610600	5.54353e+06	1234
LINF_090007800-T1-p1	LINF_090007800-T1-p1	catalytic subunit of the vacuolar transporter chaperone 4 - putative	19	5149900	5439000	6021500	5536800	1235
LINF_340041600-T1-p1	LINF_340041600-T1-p1	amidinotransferase - putative	13	5406000	5764200	5420700	5530300	1236
LINF_350008700-T1-p1	LINF_350008700-T1-p1	enoyl-CoA hydratase/isomerase family protein - conserved	12	5188600	5576000	5824000	5.52953e+06	1237
LINF_290006000-T1-p1	LINF_290006000-T1-p1	C2 domain in Dock180 and Zizimin proteins - putative	44	5771700	5173400	5624400	5.52317e+06	1238
LINF_170016300-T1-p1	LINF_170016300-T1-p1	ATP-dependent RNA helicase - putative	43	5535900	5123400	5909300	5.52287e+06	1239
LINF_130020000-T1-p1	LINF_130020000-T1-p1	programmed cell death 6 protein-like protein	7	5057600	5352000	6158200	5522600	1240
LINF_210021000-T1-p1	LINF_210021000-T1-p1	vesicle-associated membrane protein - putative	10	5602700	5532700	5424400	5.51993e+06	1241
LINF_100014500-T1-p1	LINF_100014500-T1-p1	WD domain - G-beta repeat - putative	10	5709300	5352100	5498300	5519900	1242
LINF_170013300-T1-p1	LINF_170013300-T1-p1	hypothetical protein - conserved	7	4961700	5707300	5887500	5.51883e+06	1243
LINF_260008800-T1-p1	LINF_260008800-T1-p1	Regulator of Vps4 activity in the MVB pathway - putative	8	5536700	5391400	5614700	5.51427e+06	1244
LINF_310023900-T1-p1	LINF_310023900-T1-p1	MYND finger containing protein - putative	10	5566100	5472000	5493900	5.51067e+06	1245
LINF_340038800-T1-p1	LINF_340038800-T1-p1	NmrA-like family/NADH(P)-binding/NAD dependent epimerase/dehydratase family/3-beta hydroxysteroid dehydrogenase/isomerase family -	12	5192600	5545200	5785800	5.50787e+06	1246
LINF_340028300-T1-p1	LINF_340028300-T1-p1	twinfilin - putative	13	5196900	5397200	5902600	5498900	1247
LINF_290029100-T1-p1	LINF_290029100-T1-p1	C-8 sterol isomerase-like protein	4	5451100	5216500	5787000	5.48487e+06	1248
LINF_040005200-T1-p1	LINF_040005200-T1-p1	cAMP-specific phosphodiesterase - putative	13	5661500	5386800	5390600	5.47963e+06	1249
LINF_360064300-T1-p1	LINF_360064300-T1-p1	L-2-hydroxyglutarate dehydrogenase - mitochondrial - putative	13	5250900	5017900	6141700	5.47017e+06	1250
LINF_290007100-T1-p1	LINF_290007100-T1-p1	protein transport protein Sec24A - putative	17	5106900	5683200	5594000	5.46137e+06	1251
LINF_300028700-T1-p1	LINF_300028700-T1-p1	hypothetical protein - conserved	6	5354600	6145900	4870900	5.45713e+06	1252
LINF_300016100-T1-p1	LINF_300016100-T1-p1	mitochondrial carrier protein-like protein	7	5022500	6072100	5276200	5.45693e+06	1253
LINF_130022000-T1-p1	LINF_130022000-T1-p1	dynein heavy chain - putative	113	5345600	5472200	5547700	5.45517e+06	1254
LINF_320017200-T1-p1	LINF_320017200-T1-p1	hypothetical protein - conserved	11	5071300	6039600	5199000	5.43663e+06	1255
LINF_350028000-T1-p1	LINF_350028000-T1-p1	ATP-dependent RNA helicase-like protein	19	5320500	5387700	5597000	5.43507e+06	1256
LINF_020005300-T1-p1	LINF_020005300-T1-p1;LINF_250031600-T1-p1	aminopeptidase P1 - putative	20	5211800	5479600	5606000	5.43247e+06	1257
LINF_310012100-T1-p1	LINF_310012100-T1-p1	mitochondrial RNA binding protein - putative	29	4826900	5593300	5864200	5.42813e+06	1258
LINF_360049500-T1-p1	LINF_360049500-T1-p1	hypothetical protein - conserved	12	5748300	5225800	5281500	5.41853e+06	1259
LINF_090016200-T1-p1	LINF_090016200-T1-p1	N-terminal region of Chorein- a TM vesicle-mediated sorter - putative	2	5120900	5159000	5946600	5.40883e+06	1260
LINF_310005000-T1-p1	LINF_310005000-T1-p1	5-methyltetrahydropteroyltriglutamate-homocysteine S-methyltransferase	17	5481400	5169100	5568500	5.40633e+06	1261
LINF_310013500-T1-p1	LINF_310013500-T1-p1	c2 domain protein - putative	5	5167900	5312000	5728600	5.40283e+06	1262
LINF_070006000-T1-p1	LINF_070006000-T1-p1	metallo-peptidase - Clan ME - Family M16C	18	5318600	4936000	5944000	5.39953e+06	1263
LINF_090007700-T1-p1	LINF_090007700-T1-p1	Domain of unknown function (DUF4586) - putative	7	5440700	5699200	5044400	5.39477e+06	1264
LINF_280028000-T1-p1	LINF_280028000-T1-p1	Dynein light chain LC6 - flagellar outer arm - putative	2	5349100	5354800	5470600	5391500	1265
LINF_240025100-T1-p1	LINF_240025100-T1-p1	WD domain - G-beta repeat/PFU (PLAA family ubiquitin binding) - putative	16	5405100	5298500	5465700	5.38977e+06	1266
LINF_180017700-T1-p1	LINF_180017700-T1-p1	prolyl-tRNA synthetase - putative	7	5392100	5324500	5400600	5372400	1267
LINF_270008100-T1-p1	LINF_270008100-T1-p1	methylmalonyl-coenzyme a mutase - putative	21	5294900	5489100	5322400	5368800	1268
LINF_240026600-T1-p1	LINF_240026600-T1-p1	BolA-like protein - putative	3	5083500	5232600	5787900	5368000	1269
LINF_340007100-T1-p1	LINF_340007100-T1-p1	Antimony resistance marker of 58 kDa	4	5368500	5443800	5276400	5362900	1270
LINF_160005100-T1-p1	LINF_160005100-T1-p1	hypotetical protein - conserved	6	5276000	5522100	5278600	5358900	1271
LINF_320036400-T1-p1	LINF_320036400-T1-p1	hypothetical protein - conserved	12	5194800	5584400	5293300	5357500	1272
LINF_290020900-T1-p1	LINF_290020900-T1-p1	phosphatidylinositol 4-kinase alpha - putative	8	5631600	4969700	5469100	5356800	1273
LINF_360060400-T1-p1	LINF_360060400-T1-p1	Casein kinase II subunit beta - putative	5	5630600	5135800	5294500	5.35363e+06	1274
LINF_280039500-T1-p1	LINF_280039500-T1-p1	glucosamine 6-phosphate n-acetyltransferase - putative	4	4962100	5595200	5488800	5348700	1275
LINF_350026200-T1-p1	LINF_350026200-T1-p1	hypothetical protein - conserved	13	4988800	5685400	5363400	5.34587e+06	1276
LINF_290033200-T1-p1	LINF_290033200-T1-p1	NOL1/NOP2/sun family/FtsJ-like methyltransferase - putative	14	5069400	5060200	5901700	5.34377e+06	1277
LINF_150015500-T1-p1	LINF_150015500-T1-p1	protein kinase - putativeGeneDB:LmjF.15.0770	17	5087200	5426700	5484400	5.33277e+06	1278
LINF_350035400-T1-p1	LINF_350035400-T1-p1	trypanothione-dependent glyoxalase I	2	6004000	5135200	4849300	5329500	1279
LINF_330034300-T1-p1	LINF_330034300-T1-p1	mitochondrial RNA binding complex 1 subunit	17	5382700	5184000	5409200	5325300	1280
LINF_270033400-T1-p1	LINF_270033400-T1-p1;LINF_270033500-T1-p1;LINF_020012100-T1-p1	hypothetical protein - conserved	8	5070800	4917000	5966200	5318000	1281
LINF_300034300-T1-p1	LINF_300034300-T1-p1	hypothetical protein - conserved	14	5230800	5404700	5311900	5315800	1282
LINF_260021900-T1-p1	LINF_260021900-T1-p1;LINF_260022000-T1-p1;LINF_260022100-T1-p1	sphingolipid delta 4 desaturase - putative	6	4685000	5574300	5661800	5.30703e+06	1283
LINF_290023600-T1-p1	LINF_290023600-T1-p1	Thioesterase superfamily - putative	7	5322800	5273400	5311700	5.30263e+06	1284
LINF_340046600-T1-p1	LINF_340046600-T1-p1	hypothetical protein - conserved	4	5476200	5302900	5107900	5.29567e+06	1285
LINF_010008000-T1-p1	LINF_010008000-T1-p1	acidocalcisomal exopolyphosphatase - putative	10	5158200	5500100	5227800	5.29537e+06	1286
LINF_200017300-T1-p1	LINF_200017300-T1-p1	calpain-like cysteine peptidase - Clan CA - family C2	4	5448600	5603800	4831600	5.29467e+06	1287
LINF_350020400-T1-p1	LINF_350020400-T1-p1	rieske iron-sulfur protein - mitochondrial precursor - putative	7	6113600	5386400	4355500	5.28517e+06	1288
LINF_280027900-T1-p1	LINF_280027900-T1-p1	cullin 2 - putative	8	5433100	5315300	5103300	5283900	1289
LINF_180013400-T1-p1	LINF_180013400-T1-p1	hypothetical protein - conserved	66	5052500	5265400	5507000	5.27497e+06	1290
LINF_320039800-T1-p1	LINF_320039800-T1-p1	dynein light intermediate chain - putative	11	5433900	5383500	4992800	5.27007e+06	1291
LINF_350014600-T1-p1	LINF_350014600-T1-p1	hypothetical protein - conserved	16	5301100	5182100	5303400	5262200	1292
LINF_060018400-T1-p1	LINF_060018400-T1-p1	FAD binding domain containing protein - putative	15	4890600	5537600	5356800	5.26167e+06	1293
LINF_300024900-T1-p1	LINF_300024900-T1-p1	intraflagellar transport (IFT) protein - putative	4	6706800	4846200	4230600	5261200	1294
LINF_360077100-T1-p1	LINF_360077100-T1-p1	similarity to endo-1-like protein	5	5165900	5558400	5056300	5260200	1295
LINF_320008200-T1-p1	LINF_320008200-T1-p1	intraflagellar transport protein 140 - putative	29	5042200	5465800	5260500	5.25617e+06	1296
LINF_320020800-T1-p1	LINF_320020800-T1-p1	Metalloprotease M41 FtsH - putative	19	4927200	5161100	5643800	5.24403e+06	1297
LINF_350045800-T1-p1	LINF_350045800-T1-p1	ATP-dependent RNA helicase - putative	13	5133000	5072000	5525000	5.24333e+06	1298
LINF_330021500-T1-p1	LINF_330021500-T1-p1	hypothetical protein - conserved	7	5224800	5496200	4989000	5.23667e+06	1299
LINF_210013300-T1-p1	LINF_210013300-T1-p1	hypothetical protein - conserved	17	5167300	5133700	5403100	5234700	1300
LINF_060014900-T1-p1	LINF_060014900-T1-p1	hypothetical protein - conserved	9	5157000	5256000	5284200	5232400	1301
LINF_010008300-T1-p1	LINF_010008300-T1-p1	hypothetical protein - conserved	7	4794900	5624600	5262400	5227300	1302
LINF_350051300-T1-p1	LINF_350051300-T1-p1	hypothetical protein - conserved	43	5068100	5212600	5386400	5.22237e+06	1303
LINF_330018400-T1-p1	LINF_330018400-T1-p1	guanylate kinase - putative	9	4652300	5303500	5697100	5.21763e+06	1304
LINF_130010100-T1-p1	LINF_130010100-T1-p1	Protein of unknown function (DUF1014) - putative	8	5216500	5147400	5282100	5.21533e+06	1305
LINF_230013800-T1-p1	LINF_230013800-T1-p1	WD domain - G-beta repeat/BING4CT (NUC141) domain containing protein - putative	7	5328900	5390100	4913800	5.21093e+06	1306
LINF_050014100-T1-p1	LINF_050014100-T1-p1	CPSF A subunit region containing protein - putative	35	5309400	5175000	5125900	5.20343e+06	1307
LINF_050016300-T1-p1	LINF_050016300-T1-p1	Nodulation protein S (NodS)/Methyltransferase domain containing protein - putative	8	4921200	4970700	5706700	5.19953e+06	1308
LINF_160021200-T1-p1	LINF_160021200-T1-p1	hypothetical protein - conserved	3	5179000	5848900	4570200	5.19937e+06	1309
LINF_350007700-T1-p1	LINF_350007700-T1-p1	GTP-ase activating protein - putative	2	5095400	4760100	5732500	5196000	1310
LINF_180009500-T1-p1	LINF_180009500-T1-p1	serine carboxypeptidase (CBP1) - putative	11	4806600	4999600	5775800	5194000	1311
LINF_300041400-T1-p1	LINF_300041400-T1-p1	mago nashi-like protein - putative	6	5524000	4945800	5107700	5192500	1312
LINF_360025700-T1-p1	LINF_360025700-T1-p1	hypothetical protein - conserved	9	5162500	5095400	5243800	5.16723e+06	1313
LINF_340006500-T1-p1	LINF_340006500-T1-p1	malate dehydrogenase - putative	11	5080300	5097000	5320800	5.16603e+06	1314
LINF_200005800-T1-p1	LINF_200005800-T1-p1	hypothetical protein - conserved	19	5265100	4975300	5210300	5.15023e+06	1315
LINF_330012400-T1-p1	LINF_330012400-T1-p1	hypothetical protein - conserved	17	4962700	5346000	5128800	5.14583e+06	1316
LINF_230017800-T1-p1	LINF_230017800-T1-p1	cytosolic leucyl aminopeptidase	17	5562700	4810800	5058800	5144100	1317
LINF_310038400-T1-p1	LINF_310038400-T1-p1	Repressor of differentiation kinase 2 - putative	9	5412400	4958500	5027800	5132900	1318
LINF_250027500-T1-p1	LINF_250027500-T1-p1	Protein phosphatase 2C/Stage II sporulation protein E (SpoIIE) - putative	9	5221400	5200600	4963400	5.12847e+06	1319
LINF_330022200-T1-p1	LINF_330022200-T1-p1	hypothetical protein - conserved	8	4989500	5232700	5163200	5.12847e+06	1320
LINF_330030400-T1-p1	LINF_330030400-T1-p1	WD domain - G-beta repeat - putative	13	5223100	5048500	5108700	5.12677e+06	1321
LINF_030006100-T1-p1	LINF_030006100-T1-p1	acetyltransferase - putative	5	4999800	5209800	5166800	5.12547e+06	1322
LINF_330027200-T1-p1	LINF_330027200-T1-p1	nucleolar GTP-binding protein - putative	16	4923300	5475800	4960400	5.11983e+06	1323
LINF_220018600-T1-p1	LINF_220018600-T1-p1	WD domain - G-beta repeat - putative	10	5199600	5315600	4842200	5.11913e+06	1324
LINF_130018800-T1-p1	LINF_130018800-T1-p1	hypothetical protein - conserved	25	5254100	5261900	4759400	5091800	1325
LINF_230005500-T1-p1	LINF_230005500-T1-p1	cyclophilin 11 - putative	9	5479200	5054500	4739100	5.09093e+06	1326
LINF_340029600-T1-p1	LINF_340029600-T1-p1	dolichyl-P-Man:GDP-Man1GlcNAc2-PP-dolichyl alpha-1 -3-mannosyltransferase - putative	13	5099700	5045000	5127300	5.09067e+06	1327
LINF_300015700-T1-p1	LINF_300015700-T1-p1	ubiquitin conjugation factor E4 B - putative	20	5407300	4671000	5178000	5.08543e+06	1328
LINF_300042700-T1-p1	LINF_300042700-T1-p1	Protein of unknown function (DUF3808)/Tetratricopeptide repeat - putative	16	5123200	4935900	5196200	5085100	1329
LINF_050009600-T1-p1	LINF_050009600-T1-p1	GTPase - putative	13	5105300	4937000	5212000	5.08477e+06	1330
LINF_340016700-T1-p1	LINF_340016700-T1-p1	uracil phosphoribosyltransferase - putative	7	5492500	4831700	4883600	5.06927e+06	1331
LINF_030007500-T1-p1	LINF_030007500-T1-p1	Apolipoprotein A1/A4/E domain containing protein - putative	3	4567900	5230200	5393900	5064000	1332
LINF_350017100-T1-p1	LINF_350017100-T1-p1	short chain dehydrogenase - putative	13	4972600	5208500	4983400	5.05483e+06	1333
LINF_110013200-T1-p1	LINF_110013200-T1-p1	hypothetical protein - conserved	4	4472800	5514200	5169500	5.05217e+06	1334
LINF_030012100-T1-p1	LINF_030012100-T1-p1	Aminoacyl-tRNA editing domain containing protein - putative	4	4890100	5087500	5166100	5047900	1335
LINF_130016400-T1-p1	LINF_130016400-T1-p1	Alpha/beta hydrolase family - putative	12	4943200	5016600	5181700	5.04717e+06	1336
LINF_260025600-T1-p1	LINF_260025600-T1-p1	hypothetical protein - conserved	10	4950600	5210600	4928500	5029900	1337
LINF_280018200-T1-p1	LINF_280018200-T1-p1	p450 reductase - putative	18	4976700	4723700	5379300	5.02657e+06	1338
LINF_110013700-T1-p1	LINF_110013700-T1-p1	hypothetical protein - conserved	21	5047500	5005600	5013200	5022100	1339
LINF_120016900-T1-p1	LINF_120016900-T1-p1	arginine N-methyltransferase-like protein	10	5001600	5050500	5012000	5.02137e+06	1340
LINF_270009300-T1-p1	LINF_270009300-T1-p1	ribokinase - putative	11	4666200	5257000	5115300	5.01283e+06	1341
LINF_250005500-T1-p1	LINF_250005500-T1-p1	Got1/Sft2-like family - putative	2	5109000	4849600	5075500	5.01137e+06	1342
LINF_360029200-T1-p1	LINF_360029200-T1-p1	Plasma-membrane choline transporter - putative	2	4428100	7208300	3389200	5.00853e+06	1343
LINF_300009200-T1-p1	LINF_300009200-T1-p1	WD-40 repeat protein	6	5383900	5175800	4433500	4.99773e+06	1344
LINF_350039100-T1-p1	LINF_350039100-T1-p1	hypothetical protein - conserved	26	4971900	4817400	5171300	4.98687e+06	1345
LINF_270006000-T1-p1	LINF_270006000-T1-p1	hypothetical protein - conserved	2	5157600	5400300	4377100	4.97833e+06	1346
LINF_100017900-T1-p1	LINF_100017900-T1-p1	Eukaryotic translation initiation factor 4 gamma type 5 - putative	23	5023300	5052800	4845000	4973700	1347
LINF_070011900-T1-p1	LINF_070011900-T1-p1	vacuolar-type Ca2+-ATPase - putative	28	4912200	5054500	4946200	4.97097e+06	1348
LINF_020008600-T1-p1	LINF_020008600-T1-p1	casein kinase II - alpha chain - putative	14	4810700	4874600	5225900	4970400	1349
LINF_280021300-T1-p1	LINF_280021300-T1-p1	ATP-dependent RNA helicase FAL1 - putative	15	4982400	4808400	5118400	4.96973e+06	1350
LINF_360035400-T1-p1	LINF_360035400-T1-p1	acetyltransferase-like protein	6	4671100	4415500	5799500	4.96203e+06	1351
LINF_270028000-T1-p1	LINF_270028000-T1-p1	hypothetical protein - conserved	2	5241000	4242800	5375400	4.95307e+06	1352
LINF_320038900-T1-p1	LINF_320038900-T1-p1	pyrroline-5-carboxylate synthetase-like protein	9	4558400	5220500	5078500	4.95247e+06	1353
LINF_260014600-T1-p1	LINF_260014600-T1-p1	NMD3 family - putative	22	4849500	4982900	5020900	4951100	1354
LINF_320012400-T1-p1	LINF_320012400-T1-p1	ubiquitin-conjugating enzyme E2 - putative	7	4815700	5369700	4665400	4.95027e+06	1355
LINF_170021500-T1-p1	LINF_170021500-T1-p1	zinc-finger protein ZPR1 - putative	12	4671000	4837400	5319600	4.94267e+06	1356
LINF_210010600-T1-p1	LINF_210010600-T1-p1	hypothetical protein - conserved	13	5008400	4744900	5068400	4.94057e+06	1357
LINF_150018400-T1-p1	LINF_150018400-T1-p1	solanesyl-diphosphate synthase - putative	12	5283500	4574800	4920200	4.92617e+06	1358
LINF_360005800-T1-p1	LINF_360005800-T1-p1	leucine carboxyl methyltransferase - putative	14	4664400	5166300	4920200	4.91697e+06	1359
LINF_170011800-T1-p1	LINF_170011800-T1-p1	RNA-binding protein - putative	9	5221600	4700500	4767500	4.89653e+06	1360
LINF_220022700-T1-p1	LINF_220022700-T1-p1	hypothetical protein - conserved	3	5325000	4294700	5055800	4.89183e+06	1361
LINF_330037900-T1-p1	LINF_330037900-T1-p1;LINF_250031200-T1-p1	cysteine peptidase - Clan CA - family C51 - putative	7	4751000	4943200	4978300	4.89083e+06	1362
LINF_210011600-T1-p1	LINF_210011600-T1-p1	hypothetical protein - conserved	6	4671100	4818400	5169300	4.88627e+06	1363
LINF_300028900-T1-p1	LINF_300028900-T1-p1	sphingosine 1-phosphate lyase	17	4627100	4918700	5111100	4.88563e+06	1364
LINF_360049800-T1-p1	LINF_360049800-T1-p1	phosphoglycerate mutase family member 5 - putative	8	5066700	4998000	4587500	4.88407e+06	1365
LINF_230015400-T1-p1	LINF_230015400-T1-p1	mitochondrial RNA binding protein - putative	10	5204900	5350600	4002400	4.85263e+06	1366
LINF_050017000-T1-p1	LINF_050017000-T1-p1	fatty acid elongase - putative	1	4273700	5028600	5235600	4.84597e+06	1367
LINF_360015800-T1-p1	LINF_360015800-T1-p1	intraflagellar transport protein 122 - putative	19	4849500	4855600	4821600	4.84223e+06	1368
LINF_360026100-T1-p1	LINF_360026100-T1-p1	DNA mismatch repair protein MSH6 - putative	16	4925700	4576200	5022800	4.84157e+06	1369
LINF_020009700-T1-p1	LINF_020009700-T1-p1	voltage-dependent anion-selective channel - putative	12	4636700	4695800	5187700	4.84007e+06	1370
LINF_010006000-T1-p1	LINF_010006000-T1-p1	monothiol glutaredoxin - putative	4	4595100	4544600	5377300	4839000	1371
LINF_360011500-T1-p1	LINF_360011500-T1-p1	Eukaryotic translation initiation factor 4E type 5 - putative	8	4926200	4820900	4721300	4822800	1372
LINF_280011900-T1-p1	LINF_280011900-T1-p1	Ankyrin repeats (many copies)/Ankyrin repeats (3 copies)/Ankyrin repeat - putative	6	4529900	4664800	5272700	4.82247e+06	1373
LINF_140019700-T1-p1	LINF_140019700-T1-p1	DnaJ domain containing protein - putative	14	4481800	4950500	5026500	4819600	1374
LINF_240029400-T1-p1	LINF_240029400-T1-p1	mitogen-activated protein kinase	7	4629900	4653600	5123100	4802200	1375
LINF_200022200-T1-p1	LINF_200022200-T1-p1;LINF_200022100-T1-p1	amidohydrolase - putative	2	4398900	4963700	5038000	4800200	1376
LINF_250017400-T1-p1	LINF_250017400-T1-p1	cytochrome c oxidase VII - putativeGeneDB:LmjF.25.1130	3	4475200	4547000	5334000	4785400	1377
LINF_290021100-T1-p1	LINF_290021100-T1-p1	hypothetical protein - conserved	13	4462300	5124900	4760600	4782600	1378
LINF_290036500-T1-p1	LINF_290036500-T1-p1	hypothetical protein - conserved	8	4846100	4642500	4847500	4778700	1379
LINF_070007100-T1-p1	LINF_070007100-T1-p1	protein phosphatase 2A - regulatory subunit B - putative	9	4738600	4730800	4847900	4.77243e+06	1380
LINF_110009000-T1-p1	LINF_110009000-T1-p1	BOP1NT (NUC169) domain/WD domain - G-beta repeat - putative	16	4546900	4939200	4795200	4.76043e+06	1381
LINF_250007000-T1-p1	LINF_250007000-T1-p1	ubiquitin carboxyl-terminal hydrolase - putative	10	4867700	4499600	4913600	4760300	1382
LINF_280007700-T1-p1	LINF_280007700-T1-p1	hypothetical protein - conserved	15	4623600	4826100	4815700	4.75513e+06	1383
LINF_240023900-T1-p1	LINF_240023900-T1-p1	RNA recognition motif. (a.k.a. RRM - RBD - or RNP domain)/RNA recognition motif (a.k.a. RRM - RBD - or RNP domain) - putative | tr	3	5209000	5153100	3896600	4752900	1384
LINF_350023400-T1-p1	LINF_350023400-T1-p1	COP-coated vesicle membrane protein gp25L precursor - putative	6	4421900	4624400	5169100	4.73847e+06	1385
LINF_120015300-T1-p1	LINF_120015300-T1-p1	hypothetical protein - conserved	20	4658100	4596100	4917800	4724000	1387
LINF_270021600-T1-p1	LINF_270021600-T1-p1	Cyclic nucleotide-binding domain containing protein - putative	6	4654500	4922100	4589100	4721900	1388
LINF_290032800-T1-p1	LINF_290032800-T1-p1	vacuolar protein sorting-associated protein 4	10	4603400	4769000	4774900	4.71577e+06	1389
LINF_010006500-T1-p1	LINF_010006500-T1-p1	LSM domain containing protein - putative	3	4352100	5353600	4415200	4.70697e+06	1390
LINF_080011100-T1-p1	LINF_080011100-T1-p1	hypothetical protein - conserved	1	139502	7232300	6744500	4705434	1391
LINF_160018100-T1-p1	LINF_160018100-T1-p1	hypothetical protein - conserved	23	4872300	4746600	4468400	4.69577e+06	1392
LINF_330007800-T1-p1	LINF_330007800-T1-p1	RGG-containing protein 2 - putative	8	4689700	4747000	4647600	4.69477e+06	1393
LINF_260029100-T1-p1	LINF_260029100-T1-p1	SLY1 protein - putative	16	4652100	4568700	4852800	4691200	1394
LINF_230025300-T1-p1	LINF_230025300-T1-p1	GAF domain/TIP41-like family - putative	14	4745300	4809300	4481500	4678700	1395
LINF_220006400-T1-p1	LINF_220006400-T1-p1	hypothetical protein - conserved	13	4784600	4550700	4693200	4.67617e+06	1396
LINF_360015500-T1-p1	LINF_360015500-T1-p1	hypothetical protein - conserved	7	4762300	4334900	4916200	4.67113e+06	1397
LINF_210010300-T1-p1	LINF_210010300-T1-p1	DnaJ protein - putative	9	4338300	5031800	4634400	4.66817e+06	1398
LINF_040006400-T1-p1	LINF_040006400-T1-p1	hypothetical protein - conserved	4	4126200	5111200	4728300	4.65523e+06	1399
LINF_110019400-T1-p1	LINF_110019400-T1-p1	Ribosomal protein L4/L1 family - putative	5	4236800	4945500	4782100	4654800	1400
LINF_310012500-T1-p1	LINF_310012500-T1-p1	C2 domain containing protein - putative	8	4505200	4739800	4666000	4637000	1401
LINF_230016100-T1-p1	LINF_230016100-T1-p1	Na/H antiporter-like protein	9	4831300	4068000	4994600	4631300	1402
LINF_300013500-T1-p1	LINF_300013500-T1-p1	hypothetical protein - conserved	3	4870000	4381300	4624700	4.62533e+06	1403
LINF_050014000-T1-p1	LINF_050014000-T1-p1	hypothetical protein - conserved	4	4477200	4718800	4671000	4.62233e+06	1404
LINF_270005600-T1-p1	LINF_270005600-T1-p1	hypothetical protein - conserved	6	4403600	4843900	4611800	4.61977e+06	1405
LINF_050013700-T1-p1	LINF_050013700-T1-p1	zinc-finger of a C2HC-type - putative	10	4643900	4384800	4827800	4.61883e+06	1406
LINF_200011900-T1-p1	LINF_200011900-T1-p1	serine/threonine protein phosphatase 2A regulatory subunit - putative	18	4376900	4769600	4668600	4.60503e+06	1407
LINF_200016730-T1-p1	LINF_200016730-T1-p1	unspecified product	4	4557000	4984700	4265000	4.60223e+06	1408
LINF_350013700-T1-p1	LINF_350013700-T1-p1	hypothetical protein - conserved	10	4668400	4604700	4518600	4.59723e+06	1409
LINF_280034000-T1-p1	LINF_280034000-T1-p1	protein phosphatase 4 catalytic subunit - putative	8	4277100	4837900	4668600	4.59453e+06	1410
LINF_340048800-T1-p1	LINF_340048800-T1-p1	hypothetical protein - conserved	10	4623100	4401800	4737000	4587300	1411
LINF_230012800-T1-p1	LINF_230012800-T1-p1	Putative tRNA binding domain containing protein - putative	2	4177500	5228000	4317200	4.57423e+06	1412
LINF_320039600-T1-p1	LINF_320039600-T1-p1	50S ribosome-binding GTPase/Miro-like protein/Ras family - putative	5	5532600	4002400	4160700	4.56523e+06	1413
LINF_360039500-T1-p1	LINF_360039500-T1-p1	cyclophilin 10 - putative	5	4569300	4693100	4425100	4562500	1414
LINF_360079900-T1-p1	LINF_360079900-T1-p1	CG1104 protein-like protein	20	4637400	4354100	4679500	4557000	1415
LINF_360020200-T1-p1	LINF_360020200-T1-p1	The ARF-like 2 binding protein BART - putative	5	4828300	4558200	4248400	4.54497e+06	1416
LINF_050007600-T1-p1	LINF_050007600-T1-p1	hypothetical protein - conserved	4	4369900	4284900	4976400	4.54373e+06	1417
LINF_260011800-T1-p1	LINF_260011800-T1-p1	Protein of unknown function (DUF2012) - putative	7	4437500	4599300	4584000	4.54027e+06	1418
LINF_210021300-T1-p1	LINF_210021300-T1-p1	hypothetical protein - conserved	11	4128900	4382400	5104500	4538600	1419
LINF_360075000-T1-p1	LINF_360075000-T1-p1	GTPase activating protein - putative	11	4395200	4551100	4667800	4.53803e+06	1420
LINF_250016100-T1-p1	LINF_250016100-T1-p1	protein transport protein Sec61 gamma subunit - putative	2	4804900	4126600	4644600	4.52537e+06	1421
LINF_330036500-T1-p1	LINF_330036500-T1-p1	3-oxoacyl-acyl carrier protein synthase ii - putative	12	4296300	4405700	4865500	4522500	1422
LINF_120012300-T1-p1	LINF_120012300-T1-p1	Protein of unknown function (DUF962) - putative	4	3964900	4540700	5058700	4.52143e+06	1423
LINF_150013500-T1-p1	LINF_150013500-T1-p1	CRAL/TRIO domain containing protein - putative	13	4333000	4701500	4527200	4.52057e+06	1424
LINF_110007100-T1-p1	LINF_110007100-T1-p1	pterin-4-alpha-carbinolamine dehydratase - putative	6	4413500	4298100	4849200	4.52027e+06	1425
LINF_290034100-T1-p1	LINF_290034100-T1-p1	SAM domain (Sterile alpha motif) - putative	32	4510700	4504400	4528000	4.51437e+06	1426
LINF_250009900-T1-p1	LINF_250009900-T1-p1	Kringle domain containing protein - putative	2	4178600	4538200	4818500	4.51177e+06	1427
LINF_220019300-T1-p1	LINF_220019300-T1-p1	hypothetical protein - conserved	18	4423400	4406900	4691000	4507100	1428
LINF_140011200-T1-p1	LINF_140011200-T1-p1	WD domain - G-beta repeat - putative	13	4422300	4533400	4561400	4505700	1429
LINF_340025200-T1-p1	LINF_340025200-T1-p1	Regulator of chromosome condensation (RCC1) repeat - putative	10	4465700	4505500	4538600	4.50327e+06	1430
LINF_360069200-T1-p1	LINF_360069200-T1-p1	hypothetical protein - conserved	5	4602000	4547200	4357900	4.50237e+06	1431
LINF_120007900-T1-p1	LINF_120007900-T1-p1	ornithine decarboxylase - putative	14	4440000	4278200	4778800	4499000	1432
LINF_360078100-T1-p1	LINF_360078100-T1-p1	hypothetical protein - conserved	2	4663900	4419600	4385000	4489500	1433
LINF_280028900-T1-p1	LINF_280028900-T1-p1	glycoprotein 96-92 - putative	9	5008100	4573100	3866500	4.48257e+06	1434
LINF_150013100-T1-p1	LINF_150013100-T1-p1	Signal peptidase subunit - putative	10	4280700	4551500	4610900	4.48103e+06	1435
LINF_330021600-T1-p1	LINF_330021600-T1-p1	iron-sulfur cluster assembly protein - putative	7	4339500	4568300	4535100	4.48097e+06	1436
LINF_360032100-T1-p1	LINF_360032100-T1-p1	acid phosphatase - putative	8	4321800	4837200	4271700	4476900	1437
LINF_300016300-T1-p1	LINF_300016300-T1-p1	Flavinator of succinate dehydrogenase - putative	5	4218900	4260200	4922200	4467100	1438
LINF_360052500-T1-p1	LINF_360052500-T1-p1	predicted C2 domain protein	4	4036500	4372100	4980000	4.46287e+06	1439
LINF_090007900-T1-p1	LINF_090007900-T1-p1	ATP-dependent protease ATPase subunit HslU	15	4201200	4782200	4400100	4.46117e+06	1440
LINF_320019100-T1-p1	LINF_320019100-T1-p1	cleavage and polyadenylation specificity factor- like protein	36	4363000	4465400	4536800	4.45507e+06	1441
LINF_250014700-T1-p1	LINF_250014700-T1-p1	hypothetical protein - conserved	6	4670100	4246100	4445500	4453900	1442
LINF_270033300-T1-p1	LINF_270033300-T1-p1	dynein heavy chain - putative	23	4378700	4343200	4637700	4453200	1443
LINF_050005800-T1-p1	LINF_050005800-T1-p1	Nudix hydrolase 2 - putative	10	4032700	4174400	5145200	4.45077e+06	1444
LINF_320045000-T1-p1	LINF_320045000-T1-p1	kinetoplast-associated protein 3 - putative	5	4459700	4572600	4305100	4445800	1445
LINF_270014900-T1-p1	LINF_270014900-T1-p1	Repeat of unknown function (DUF1126)/EF-hand domain pair - putative	28	4298100	4519500	4471500	4429700	1446
LINF_270017100-T1-p1	LINF_270017100-T1-p1	vesicular-fusion ATPase-like protein - putative	24	4378400	4202200	4699900	4.42683e+06	1447
LINF_330005100-T1-p1	LINF_330005100-T1-p1	hypothetical protein	16	4425600	4325700	4520100	4423800	1448
LINF_350022200-T1-p1	LINF_350022200-T1-p1	casein kinase II - putative	10	4196700	4387000	4686000	4.42323e+06	1449
LINF_340015100-T1-p1	LINF_340015100-T1-p1	hypothetical protein - conserved	3	3877900	5056300	4331300	4.42183e+06	1450
LINF_230025400-T1-p1	LINF_230025400-T1-p1	hypothetical protein - conserved	3	5731100	2885100	4643900	4.42003e+06	1451
LINF_030014100-T1-p1	LINF_030014100-T1-p1	peter pan protein - putative	7	4535000	4233600	4433400	4.40067e+06	1452
LINF_070012200-T1-p1	LINF_070012200-T1-p1	hypothetical protein - conserved	9	4192100	4725600	4280100	4.39927e+06	1453
LINF_080016800-T1-p1	LINF_080016800-T1-p1	Putative intraflagellar transport protein D4	20	4058000	4631100	4507200	4.39877e+06	1454
LINF_010008400-T1-p1	LINF_010008400-T1-p1	Uncharacterised protein family (UPF0041) - putative	2	2916100	3735600	6522100	4.39127e+06	1455
LINF_360070900-T1-p1	LINF_360070900-T1-p1	CCR4-NOT transcription complex subunit 10 - putative	18	4216200	4457500	4468200	4.38063e+06	1456
LINF_270026700-T1-p1	LINF_270026700-T1-p1	Intraflagellar transport protein 43 - putative	6	4523200	4401200	4211200	4.37853e+06	1457
LINF_350044800-T1-p1	LINF_350044800-T1-p1	unc-50 related protein homolog	2	4090900	3709700	5330100	4376900	1458
LINF_300017700-T1-p1	LINF_300017700-T1-p1	small nuclear ribonucleoprotein polypeptide e - putative	4	4390600	4298100	4440300	4.37633e+06	1459
LINF_230008800-T1-p1	LINF_230008800-T1-p1	hypothetical protein - conserved	2	4636000	4530500	3945500	4.37067e+06	1460
LINF_350057500-T1-p1	LINF_350057500-T1-p1	NIMA-related kinase - putative	12	4189000	4589500	4321000	4366500	1461
LINF_260015600-T1-p1	LINF_260015600-T1-p1	RNA recognition motif. (a.k.a. RRM - RBD - or RNP domain) - putative	6	4633100	4183300	4278300	4364900	1462
LINF_340014700-T1-p1	LINF_340014700-T1-p1	DNA-directed RNA polymerase III subunit - putative	1	3028900	3990000	6065000	4361300	1463
LINF_350018600-T1-p1	LINF_350018600-T1-p1	Iron-binding zinc finger CDGSH type - putative	5	4184300	4453500	4442300	4.36003e+06	1464
LINF_190018300-T1-p1	LINF_190018300-T1-p1	SPFH domain / Band 7 family - putative	11	4464900	4216300	4388600	4356600	1465
LINF_090015300-T1-p1	LINF_090015300-T1-p1	ef-hand protein 5 - putative	3	3786900	4262900	5007100	4352300	1466
LINF_260020400-T1-p1	LINF_260020400-T1-p1	Glutaredoxin/Glutathione S-transferase - N-terminal domain containing protein - putative	12	4522400	4177800	4351900	4350700	1467
LINF_030011000-T1-p1	LINF_030011000-T1-p1	mitochondrial protein 99 - putative	15	4230900	4346400	4430000	4.33577e+06	1468
LINF_340041200-T1-p1	LINF_340041200-T1-p1	cleavage and polyadenylation specificity factor - putative	20	3958300	4549600	4490300	4.33273e+06	1469
LINF_330041100-T1-p1	LINF_330041100-T1-p1	Holliday-junction resolvase-like of SPT6/SH2 domain containing protein - putative	24	4396800	4135600	4438600	4.32367e+06	1470
LINF_310031100-T1-p1	LINF_310031100-T1-p1	phosphatidylethanolaminen-methyltransferase-lik e protein	7	4198800	4277300	4476200	4.31743e+06	1471
LINF_030012700-T1-p1	LINF_030012700-T1-p1	Ubiquitin-like domain containing protein - putative	10	4461400	4153900	4327900	4314400	1472
LINF_340006700-T1-p1	LINF_340006700-T1-p1	Nucleolar protein 12 (25kDa) - putative	2	3370100	5985300	3574000	4309800	1473
LINF_260007400-T1-p1	LINF_260007400-T1-p1	Eukaryotic translation initiation factor 4E type 6 - putative	6	4395000	4037800	4493900	4308900	1474
LINF_070016100-T1-p1	LINF_070016100-T1-p1	RNA binding protein - putative	3	4640900	3754000	4514500	4.30313e+06	1475
LINF_130009200-T1-p1	LINF_130009200-T1-p1	flagellar radial spoke protein - putative	14	4478900	4184500	4238400	4300600	1476
LINF_030010900-T1-p1	LINF_030010900-T1-p1	kinase-like protein	5	4525600	4759400	3596000	4.29367e+06	1477
LINF_050008100-T1-p1	LINF_050008100-T1-p1	monothiol glutaredoxin - putative	6	4210800	3866500	4783000	4.28677e+06	1478
LINF_340016200-T1-p1	LINF_340016200-T1-p1	ATP-binding cassette protein subfamily B - member 2 - putative	35	4226000	4409100	4207300	4280800	1479
LINF_260029600-T1-p1	LINF_260029600-T1-p1	hypothetical protein - conserved	5	4131000	4475800	4218800	4275200	1480
LINF_350015700-T1-p1	LINF_350015700-T1-p1	Rdx family - putative	6	4386300	3693800	4739700	4.27327e+06	1481
LINF_290016200-T1-p1	LINF_290016200-T1-p1	hypothetical protein - conserved	2	3837300	4645600	4326200	4269700	1482
LINF_270025900-T1-p1	LINF_270025900-T1-p1	hypothetical protein - conserved	19	4158700	4588300	4056700	4267900	1483
LINF_180021700-T1-p1	LINF_180021700-T1-p1	Noc2p family - putative	9	3754900	4333300	4713100	4267100	1484
LINF_110014700-T1-p1	LINF_110014700-T1-p1	60S ribosomal protein L24 - putative	3	4062700	4987700	3748400	4.26627e+06	1485
LINF_290027900-T1-p1	LINF_290027900-T1-p1	5-AMP-activated protein kinase catalytic subunit alpha - putative	18	4240400	4190100	4363300	4264600	1486
LINF_100009600-T1-p1	LINF_100009600-T1-p1	dihydroxyacetone kinase 1-like protein	13	4133400	4179800	4470900	4.26137e+06	1487
LINF_180005000-T1-p1	LINF_180005000-T1-p1	kinetoplast polyadenylation/uridylation factor 1	38	4219900	4082500	4479200	4.26053e+06	1488
LINF_320014000-T1-p1	LINF_320014000-T1-p1	RNA recognition motif (a.k.a. RRM - RBD - or RNP domain)/RNA recognition motif. (a.k.a. RRM - RBD - or RNP domain) - putative | tr	9	4176000	4316300	4274200	4255500	1489
LINF_130016300-T1-p1	LINF_130016300-T1-p1	Uncharacterised ACR - YagE family COG1723 - putative	15	4452900	4073800	4226800	4.25117e+06	1490
LINF_360028400-T1-p1	LINF_360028400-T1-p1	DEAD box RNA helicase - putative	22	4093900	4412500	4211500	4239300	1491
LINF_140007800-T1-p1	LINF_140007800-T1-p1	hypothetical protein - conserved	23	4397800	4092000	4222500	4.23743e+06	1492
LINF_330019200-T1-p1	LINF_330019200-T1-p1	hypothetical protein - conserved	1	3326500	4392800	4990900	4.23673e+06	1493
LINF_360010600-T1-p1	LINF_360010600-T1-p1	protein phosphatase 2C-like protein	8	3911800	4400900	4395100	4.23593e+06	1494
LINF_340007400-T1-p1	LINF_340007400-T1-p1	intraflagellar transport protein 81 - putative	19	4254900	4091000	4357800	4.23457e+06	1495
LINF_210017300-T1-p1	LINF_210017300-T1-p1	hypothetical protein - conserved	8	4383100	3957000	4362000	4.23403e+06	1496
LINF_220019800-T1-p1	LINF_220019800-T1-p1	intraflagellar transport protein-like protein	19	4347900	4237800	4107800	4.23117e+06	1497
LINF_290020400-T1-p1	LINF_290020400-T1-p1	LYAR-type C2HC zinc finger containing protein - putative	9	4236400	4543900	3898500	4.22627e+06	1498
LINF_190007200-T1-p1	LINF_190007200-T1-p1	GNL3L/Grn1 putative GTPase - putative	15	4010400	4083300	4564300	4.21933e+06	1499
LINF_330008400-T1-p1	LINF_330008400-T1-p1	autophagocytosis protein - putative	3	4270400	3823900	4558600	4.21763e+06	1500
LINF_240007500-T1-p1	LINF_240007500-T1-p1	Dynein intermediate chain 1 - axonemal	13	3991900	4256000	4402100	4.21667e+06	1501
LINF_330026500-T1-p1	LINF_330026500-T1-p1	hypothetical protein - conserved	10	4098600	4254000	4296500	4.21637e+06	1502
LINF_210023000-T1-p1	LINF_210023000-T1-p1	Cytochrome b5-like Heme/Steroid binding domain containing protein - putative	2	4036600	4264000	4326500	4.20903e+06	1503
LINF_080005200-T1-p1	LINF_080005200-T1-p1	Qc-SNARE protein - putative	8	4281900	4216100	4107700	4201900	1504
LINF_230018300-T1-p1	LINF_230018300-T1-p1	hypothetical protein - conserved	4	3665800	4594900	4337200	4199300	1505
LINF_330034200-T1-p1	LINF_330034200-T1-p1	Radial spokehead-like protein - putative	6	4323700	3986500	4283400	4.19787e+06	1506
LINF_350016900-T1-p1	LINF_350016900-T1-p1	Degradation arginine-rich protein for mis-folding - putative	9	4258500	4095200	4208900	4.18753e+06	1507
LINF_280019600-T1-p1	LINF_280019600-T1-p1	haloacid dehalogenase-like hydrolase-like protein	5	4392600	4101600	4063400	4.18587e+06	1508
LINF_210010500-T1-p1	LINF_210010500-T1-p1	hypothetical protein - conserved	10	3995000	4247900	4313200	4.18537e+06	1509
LINF_320036300-T1-p1	LINF_320036300-T1-p1	ubiquitin hydrolase - putative	24	4198400	4077300	4276900	4184200	1510
LINF_340036200-T1-p1	LINF_340036200-T1-p1	EF-hand domain pair/EF-hand domain/EF hand - putative	12	4008700	4187100	4351300	4.18237e+06	1511
LINF_290025600-T1-p1	LINF_290025600-T1-p1	Tob55 - putative	11	4058100	4134700	4332300	4.17503e+06	1512
LINF_030006400-T1-p1	LINF_030006400-T1-p1	ATP-binding cassette protein subfamily F - member 1 - putative	13	3999900	4260400	4259500	4.17327e+06	1513
LINF_340034000-T1-p1	LINF_340034000-T1-p1	hypothetical protein - conserved	10	4207300	4311700	3998200	4172400	1514
LINF_040013100-T1-p1	LINF_040013100-T1-p1	Pescadillo N-terminus/BRCA1 C Terminus (BRCT) domain containing protein - putative	13	4208300	4121400	4181900	4.17053e+06	1515
LINF_350018200-T1-p1	LINF_350018200-T1-p1	Thioredoxin - putative	11	4079100	4092100	4322000	4164400	1516
LINF_260007100-T1-p1	LINF_260007100-T1-p1	Silent information regulator 2 related protein 1 - putative	9	4307900	3784800	4393900	4162200	1517
LINF_310017400-T1-p1	LINF_310017400-T1-p1	emp24/gp25L/p24 family/GOLD - putative	8	3754800	4284600	4438200	4159200	1518
LINF_210026400-T1-p1	LINF_210026400-T1-p1	hypothetical protein - conserved	13	4044600	3987700	4406800	4.14637e+06	1519
LINF_300019700-T1-p1	LINF_300019700-T1-p1	ama1 protein - putative	2	3933800	4695500	3801500	4143600	1520
LINF_160010300-T1-p1	LINF_160010300-T1-p1	hypothetical protein - conserved	12	4374200	3759400	4294200	4142600	1521
LINF_360025200-T1-p1	LINF_360025200-T1-p1	Nucleolar complex-associated protein/CBF/Mak21 family - putative	12	4202900	4227800	3982100	4137600	1522
LINF_240021300-T1-p1	LINF_240021300-T1-p1	UBA/TS-N domain containing protein - putative	10	4097300	4232300	4066200	4.13193e+06	1523
LINF_240005000-T1-p1	LINF_240005000-T1-p1	clathrin coat assembly protein - putative	10	4029800	4349100	4003100	4.12733e+06	1524
LINF_300013100-T1-p1	LINF_300013100-T1-p1	hypothetical protein - conserved	2	3064600	4652300	4665000	4127300	1525
LINF_250019400-T1-p1	LINF_250019400-T1-p1	serine/threonine protein phosphatase - putative	4	4012300	3914400	4436700	4.12113e+06	1526
LINF_140005900-T1-p1	LINF_140005900-T1-p1	hypothetical protein - conserved	4	4851200	3679100	3829500	4.11993e+06	1527
LINF_130015500-T1-p1	LINF_130015500-T1-p1	Dpy-30 motif containing protein - putative	9	3985600	4178700	4193900	4119400	1528
LINF_310016000-T1-p1	LINF_310016000-T1-p1	hypothetical protein - conserved	6	3854500	4424700	4072000	4.11707e+06	1529
LINF_310005900-T1-p1	LINF_310005900-T1-p1	O-sialoglycoprotein endopeptidase - putative	5	4148600	4124800	4070500	4.11463e+06	1530
LINF_280024100-T1-p1	LINF_280024100-T1-p1	DNA topoisomerase III - putative	21	4007600	3874700	4451700	4.11133e+06	1531
LINF_340022300-T1-p1	LINF_340022300-T1-p1	hypothetical protein - conserved	6	4349100	4310600	3661000	4106900	1532
LINF_220017900-T1-p1	LINF_220017900-T1-p1;LINF_220018000-T1-p1	ChaC-like protein - putative	6	4348400	3872900	4091200	4.10417e+06	1533
LINF_260013300-T1-p1	LINF_260013300-T1-p1	hypothetical protein - conserved	19	3948600	3955500	4364600	4.08957e+06	1534
LINF_220015900-T1-p1	LINF_220015900-T1-p1	hypothetical protein - conserved	24	4033500	3894400	4339400	4089100	1535
LINF_080008300-T1-p1	LINF_080008300-T1-p1	Tim10/DDP family zinc finger containing protein - putative	1	4151400	3841900	4273300	4.08887e+06	1536
LINF_260014900-T1-p1	LINF_260014900-T1-p1	Glucosidase II beta subunit-like protein - putative	8	4130900	4108300	4024500	4087900	1537
LINF_220021200-T1-p1	LINF_220021200-T1-p1	ATP-dependent DEAD/H RNA helicase - putative	29	4150700	3960200	4142400	4.08443e+06	1538
LINF_280010600-T1-p1	LINF_280010600-T1-p1	Modifier of rudimentary (Mod(r)) protein - putative	9	4520400	3667600	4056900	4.08163e+06	1539
LINF_060017700-T1-p1	LINF_060017700-T1-p1	Thioredoxin - putative	3	4184700	4049400	3985800	4073300	1540
LINF_320031900-T1-p1	LINF_320031900-T1-p1	hypothetical protein	5	4337100	4025700	3840500	4.06777e+06	1541
LINF_320007000-T1-p1	LINF_320007000-T1-p1	hypothetical protein - conserved	15	3881900	4154700	4146500	4.06103e+06	1542
LINF_210025900-T1-p1	LINF_210025900-T1-p1	mitochondrial RNA binding complex 1 subunit - putative	6	3875200	4295100	3992100	4.05413e+06	1543
LINF_290005800-T1-p1	LINF_290005800-T1-p1	small GTP-binding protein - putative	7	4071600	4170800	3903400	4048600	1544
LINF_130018500-T1-p1	LINF_130018500-T1-p1	hypothetical protein - conserved	9	3831400	4184600	4126500	4047500	1545
LINF_330020500-T1-p1	LINF_330020500-T1-p1	Thioredoxin - putative	7	3908700	4318200	3914900	4.04727e+06	1546
LINF_060011700-T1-p1	LINF_060011700-T1-p1	carbonic anhydrase family protein - putative	3	3996700	4070400	4074500	4047200	1547
LINF_230010200-T1-p1	LINF_230010200-T1-p1	SNF1-related protein kinase regulatory subunit beta - putative	7	4403100	3831000	3907200	4047100	1548
LINF_320012100-T1-p1	LINF_320012100-T1-p1	OSM3-like kinesin - putative	17	4302500	3884000	3951300	4.04593e+06	1549
LINF_320036200-T1-p1	LINF_320036200-T1-p1	outer dynein arm docking complex - putative	9	3965800	4170800	3987900	4041500	1550
LINF_050009900-T1-p1	LINF_050009900-T1-p1	hypothetical protein - conserved	7	3730700	3862600	4520600	4.03797e+06	1551
LINF_360062400-T1-p1	LINF_360062400-T1-p1	hypothetical protein - conserved	5	4109700	4485100	3512100	4.03563e+06	1552
LINF_140012500-T1-p1	LINF_140012500-T1-p1;LINF_140012400-T1-p1	fatty acid elongase - putative	3	2154500	5680500	4265400	4.03347e+06	1553
LINF_250012500-T1-p1	LINF_250012500-T1-p1	SCAMP family - putative	4	3902700	4115900	4081600	4033400	1554
LINF_250030800-T1-p1	LINF_250030800-T1-p1	pumillio protein 8 - putative	13	4234900	3843800	3994500	4024400	1555
LINF_260007900-T1-p1	LINF_260007900-T1-p1	Nucleotide hydrolase - putative	2	4395600	3903800	3747600	4.01567e+06	1556
LINF_250015800-T1-p1	LINF_250015800-T1-p1	Complex 1 protein (LYR family) - putative	4	5882200	3270800	2890400	4.01447e+06	1557
LINF_210024500-T1-p1	LINF_210024500-T1-p1	hypothetical protein - conserved	11	4038200	3879600	4107500	4.00843e+06	1558
LINF_310017300-T1-p1	LINF_310017300-T1-p1	Domain of unknown function (DUF4498) - putative	7	3831100	3992100	4194500	4005900	1559
LINF_270016900-T1-p1	LINF_270016900-T1-p1	vesicular transport protein (CDC48 homologue) - putative	16	3825000	4068400	4123100	4005500	1560
LINF_210020800-T1-p1	LINF_210020800-T1-p1	hypothetical protein - conserved	15	4165000	3875700	3947900	3996200	1561
LINF_360040000-T1-p1	LINF_360040000-T1-p1	receptor-type adenylate cyclase a-like protein	6	4213200	3201900	4568100	3994400	1562
LINF_100015100-T1-p1	LINF_100015100-T1-p1	hypothetical protein - conserved	11	3761500	3846700	4367200	3991800	1563
LINF_170019700-T1-p1	LINF_170019700-T1-p1	hypothetical protein - conserved	22	4081500	3764300	4123000	3989600	1564
LINF_130010400-T1-p1	LINF_130010400-T1-p1	Uncharacterized ACR - COG1678 - putative	13	3887700	4166700	3895300	3.98323e+06	1565
LINF_310022300-T1-p1	LINF_310022300-T1-p1	hypothetical protein - conserved	12	3933600	4040500	3972700	3.98227e+06	1566
LINF_210024700-T1-p1	LINF_210024700-T1-p1	choline dehydrogenase - like protein	14	4002800	3813800	4129400	3982000	1567
LINF_270017600-T1-p1	LINF_270017600-T1-p1	hypothetical protein - conserved	3	3933600	3724600	4280400	3.97953e+06	1568
LINF_040010000-T1-p1	LINF_040010000-T1-p1	Nucleotidyltransferase domain containing protein - putative	2	2884000	4666900	4379500	3976800	1569
LINF_310023200-T1-p1	LINF_310023200-T1-p1	hypothetical protein - conserved	4	4001200	3747700	4178500	3975800	1570
LINF_010011300-T1-p1	LINF_010011300-T1-p1	hypothetical protein - conserved	10	4107700	3800000	4017200	3.97497e+06	1571
LINF_030014800-T1-p1	LINF_030014800-T1-p1	MORN repeat - putative	8	3627600	4125600	4162600	3.97193e+06	1572
LINF_190015400-T1-p1	LINF_190015400-T1-p1	WD domain - G-beta repeat - putative	10	3774500	4156300	3979400	3.97007e+06	1573
LINF_290005300-T1-p1	LINF_290005300-T1-p1	hypothetical protein - conserved	4	3576200	3978900	4329300	3.96147e+06	1574
LINF_300034100-T1-p1	LINF_300034100-T1-p1	hypothetical protein - conserved	14	3943600	4121000	3792600	3952400	1575
LINF_060008000-T1-p1	LINF_060008000-T1-p1	hypothetical protein - conserved	9	3947100	3944200	3965200	3.95217e+06	1576
LINF_220020400-T1-p1	LINF_220020400-T1-p1	fk506-binding protein 1-like protein	5	3911500	4251400	3688300	3950400	1577
LINF_360013900-T1-p1	LINF_360013900-T1-p1	ADP-ribosylation factor-like protein	3	4567900	3387300	3893700	3.94963e+06	1578
LINF_330017300-T1-p1	LINF_330017300-T1-p1	Rhodanese-like domain containing protein - putative	4	4074400	3828800	3943300	3.94883e+06	1579
LINF_350032400-T1-p1	LINF_350032400-T1-p1	QA-SNARE protein putative	5	3564100	4437300	3844600	3.94867e+06	1580
LINF_140005700-T1-p1	LINF_140005700-T1-p1	hypothetical protein - conserved	3	3608700	4378800	3847500	3945000	1581
LINF_280029700-T1-p1	LINF_280029700-T1-p1	Translation initiation factor eIF-2B subunit epsilon - putative	9	3922500	3818100	4058300	3.93297e+06	1582
LINF_270025100-T1-p1	LINF_270025100-T1-p1	hypothetical protein - conserved	30	4087200	4087600	3621900	3.93223e+06	1583
LINF_340041500-T1-p1	LINF_340041500-T1-p1	hypothetical protein - conserved	9	3975600	3898500	3901600	3.92523e+06	1584
LINF_350026300-T1-p1	LINF_350026300-T1-p1	R-SNARE protein - putative	4	3810700	4108600	3849600	3.92297e+06	1585
LINF_280026400-T1-p1	LINF_280026400-T1-p1	Leucine Rich Repeat/Leucine Rich repeat - putative	16	3852900	3967600	3945500	3922000	1586
LINF_240006000-T1-p1	LINF_240006000-T1-p1	guanine nucleotide-binding beta subunit-like protein	17	3884200	3878100	4000300	3.92087e+06	1587
LINF_320041400-T1-p1	LINF_320041400-T1-p1	hypothetical protein - conserved	16	4013400	3873100	3868600	3.91837e+06	1588
LINF_260012800-T1-p1	LINF_260012800-T1-p1	RNA recognition motif (a.k.a. RRM - RBD - or RNP domain)/RNA recognition motif. (a.k.a. RRM - RBD - or RNP domain) - putative | tr	2	3635500	4434200	3682900	3.91753e+06	1589
LINF_060011200-T1-p1	LINF_060011200-T1-p1	deoxyuridine triphosphatase - putative	4	3508000	4125300	4096900	3.91007e+06	1590
LINF_060008800-T1-p1	LINF_060008800-T1-p1	NAD(P)-dependent steroid dehydrogenase protein - putative	12	3793800	3616400	4315000	3908400	1591
LINF_320024200-T1-p1	LINF_320024200-T1-p1	rab11B GTPase - putative	4	3836600	3757900	4123000	3.90583e+06	1592
LINF_210021800-T1-p1	LINF_210021800-T1-p1	hypothetical protein - conserved	6	4057700	3817600	3841600	3.90563e+06	1593
LINF_300039900-T1-p1	LINF_300039900-T1-p1	T-complex protein 11 - putative	17	3726200	3968200	4021500	3905300	1594
LINF_140013800-T1-p1	LINF_140013800-T1-p1	hypothetical protein - conserved	7	3872700	4083500	3746000	3.90073e+06	1595
LINF_350016800-T1-p1	LINF_350016800-T1-p1	pre-mRNA splicing factor ATP-dependent RNA helicase - putative	15	3772500	3887000	4014400	3891300	1596
LINF_360039000-T1-p1	LINF_360039000-T1-p1	hypothetical protein - conserved	7	3915100	3993800	3759700	3.88953e+06	1597
LINF_360053700-T1-p1	LINF_360053700-T1-p1	hypothetical protein - conserved	5	4429200	3456100	3778400	3887900	1598
LINF_310031500-T1-p1	LINF_310031500-T1-p1	3 -2-trans-enoyl-CoA isomerase - mitochondrial precursor - putative	2	4289600	3504900	3856600	3883700	1599
LINF_340037800-T1-p1	LINF_340037800-T1-p1	lipophosphoglycan biosynthetic protein (lpg2)	4	3567100	4074600	3994000	3.87857e+06	1600
LINF_150008600-T1-p1	LINF_150008600-T1-p1	Isoprenylcysteine alpha-carbonyl methylesterase - putative	10	3829300	3792900	4011500	3877900	1601
LINF_140007100-T1-p1	LINF_140007100-T1-p1	PX domain containing protein - putative	12	3894100	3738400	4000700	3.87773e+06	1602
LINF_350028700-T1-p1	LINF_350028700-T1-p1	poly(A)-specific ribonuclease PARN - putative	10	3947200	3885700	3785000	3.87263e+06	1603
LINF_190008200-T1-p1	LINF_190008200-T1-p1	intraflagellar transport protein 80 - putative	14	3571800	3818500	4220300	3870200	1604
LINF_220013800-T1-p1	LINF_220013800-T1-p1	Translation initiation factor SUI1 - putative	14	3861800	3918900	3828900	3.86987e+06	1605
LINF_300023100-T1-p1	LINF_300023100-T1-p1	splicing factor 3a - putative	11	3951300	3668000	3982600	3867300	1606
LINF_240028600-T1-p1	LINF_240028600-T1-p1	Cobalamin adenosyltransferase - putative	6	3205400	3840100	4550900	3.86547e+06	1607
LINF_310007100-T1-p1	LINF_310007100-T1-p1	WD repeat protein	9	3586600	3902500	4088300	3.85913e+06	1608
LINF_160005800-T1-p1	LINF_160005800-T1-p1	Galactose oxidase - central domain/Kelch motif/Domain of unknown function (DUF4110) - putative	11	3726100	4034200	3792500	3.85093e+06	1609
LINF_300023000-T1-p1	LINF_300023000-T1-p1	Flagellar-associated PapD-like/Zeta toxin - putative	30	3979900	3676400	3893300	3.84987e+06	1610
LINF_080010800-T1-p1	LINF_080010800-T1-p1	hypothetical protein - conserved	7	4003300	3757400	3786900	3849200	1611
LINF_340009000-T1-p1	LINF_340009000-T1-p1	hypothetical protein - conserved	7	3942700	3624200	3968400	3845100	1612
LINF_120006000-T1-p1	LINF_120006000-T1-p1	hypothetical protein - conserved	8	3697700	3884600	3944000	3842100	1613
LINF_360032500-T1-p1	LINF_360032500-T1-p1	nucleoporin interacting component (NUP93) - putative	19	3722400	3979700	3810400	3837500	1614
LINF_340028100-T1-p1	LINF_340028100-T1-p1	Dynamin family/50S ribosome-binding GTPase - putative	6	3435100	3598500	4477700	3837100	1615
LINF_270012700-T1-p1	LINF_270012700-T1-p1	amino acid transporter aATP11 - putative	6	4073700	3864900	3561900	3833500	1616
LINF_340013900-T1-p1	LINF_340013900-T1-p1	Transcription factor Pcc1 - putative	4	3959500	3911000	3622200	3830900	1617
LINF_310034500-T1-p1	LINF_310034500-T1-p1	2-oxoglutarate dehydrogenase - e3 component - lipoamidedehydrogenase-like protein	8	3661100	4049500	3778700	3.82977e+06	1618
LINF_140016500-T1-p1	LINF_140016500-T1-p1	Domain of unknown function (DUF202) - putative	3	3630000	3973900	3854900	3819600	1619
LINF_260008400-T1-p1	LINF_260008400-T1-p1	Inosine-uridine preferring nucleoside hydrolase - putative	10	3658600	3686800	4111700	3.81903e+06	1620
LINF_010007600-T1-p1	LINF_010007600-T1-p1	thioredoxin - putative	6	3625400	3572100	4247700	3.81507e+06	1621
LINF_040014100-T1-p1	LINF_040014100-T1-p1	hypothetical protein - conserved	2	3980600	3873200	3583500	3.81243e+06	1622
LINF_110014100-T1-p1	LINF_110014100-T1-p1	Alpha/beta hydrolase family - putative	9	4249000	3512600	3659400	3807000	1623
LINF_300012100-T1-p1	LINF_300012100-T1-p1	nuclear movement protein - putative	4	4006700	3894400	3513600	3804900	1624
LINF_050013200-T1-p1	LINF_050013200-T1-p1	MYND zinc finger (ZnF) domain-like protein	11	3519100	4000200	3886800	3.80203e+06	1625
LINF_090013700-T1-p1	LINF_090013700-T1-p1	acyl-CoA binding protein - putative	11	3757100	3652900	3992400	3800800	1626
LINF_340033500-T1-p1	LINF_340033500-T1-p1	methyltransferase-like protein	2	3607900	4062600	3713500	3.79467e+06	1627
LINF_100020400-T1-p1	LINF_100020400-T1-p1	Protein of unknown function (DUF1861) - putative	8	3670800	3795800	3916700	3.79443e+06	1628
LINF_170009000-T1-p1	LINF_170009000-T1-p1	NADH-ubiquinone oxidoreductase - mitochondrial - putative	4	3142500	4192600	4041300	3.79213e+06	1629
LINF_320045500-T1-p1	LINF_320045500-T1-p1	hypothetical protein - conserved	5	3679500	3698100	3991800	3789800	1630
LINF_360068700-T1-p1	LINF_360068700-T1-p1	ras-like small GTPases - putative	6	3835700	3505500	4022200	3787800	1631
LINF_130006000-T1-p1	LINF_130006000-T1-p1	SURF1 family - putative	5	3648700	3786000	3917000	3783900	1632
LINF_130016800-T1-p1	LINF_130016800-T1-p1	Dynein light chain Tctex-type - putative	3	3434200	3872100	4035200	3780500	1633
LINF_280021500-T1-p1	LINF_280021500-T1-p1	hypothetical protein - conserved	6	3594600	3948800	3792500	3.77863e+06	1634
LINF_090015100-T1-p1	LINF_090015100-T1-p1	phospholipid transporting ATPase-like protein - putative	6	3269800	4079000	3985100	3.77797e+06	1635
LINF_150007700-T1-p1	LINF_150007700-T1-p1	sterol carrier protein - putative	8	3655700	3605000	4065600	3.77543e+06	1636
LINF_260024300-T1-p1	LINF_260024300-T1-p1	hypothetical protein - conserved	24	3730100	3778600	3815200	3.77463e+06	1637
LINF_350006200-T1-p1	LINF_350006200-T1-p1	coatomer subunit zeta - putative	5	3549500	4387200	3386500	3774400	1638
LINF_340010600-T1-p1	LINF_340010600-T1-p1	Amastin surface glycoprotein - putative	2	3572700	3961800	3788100	3774200	1639
LINF_310037100-T1-p1	LINF_310037100-T1-p1	hypothetical protein - conserved	3	3574700	4041600	3687700	3768000	1640
LINF_240019200-T1-p1	LINF_240019200-T1-p1;LINF_240019300-T1-p1	Zinc finger - C3HC4 type (RING finger)/Ring finger domain/zinc-RING finger domain/EF-hand domain pair/EF-hand domain/EF hand/Secre	5	3927700	3168200	4180000	3.75863e+06	1641
LINF_340049800-T1-p1	LINF_340049800-T1-p1	hypothetical protein - conserved	3	3617600	3789100	3868400	3.75837e+06	1642
LINF_360011100-T1-p1	LINF_360011100-T1-p1	hypothetical protein - conserved	7	4046300	3701100	3500500	3749300	1643
LINF_050006800-T1-p1	LINF_050006800-T1-p1	Fip1 motif/Zinc finger C-x8-C-x5-C-x3-H type (and similar) - putative	6	3698800	3687800	3856100	3.74757e+06	1644
LINF_100006500-T1-p1	LINF_100006500-T1-p1	hypothetical protein - conserved	7	3722600	3784700	3720300	3.74253e+06	1645
LINF_060012100-T1-p1	LINF_060012100-T1-p1	lanosterol synthase - putative	23	3452300	3727300	4030500	3736700	1646
LINF_090018700-T1-p1	LINF_090018700-T1-p1	hypothetical protein - conserved	5	3278400	3582000	4342500	3734300	1647
LINF_190007000-T1-p1	LINF_190007000-T1-p1	polyprenyl synthase - putative	10	3780200	3607800	3808200	3.73207e+06	1648
LINF_360012700-T1-p1	LINF_360012700-T1-p1	Protein C21orf2 homolog - putative	7	3819400	3652100	3717500	3.72967e+06	1649
LINF_050015900-T1-p1	LINF_050015900-T1-p1	ATPase - putative	11	3534200	3846500	3793700	3724800	1650
LINF_360028800-T1-p1	LINF_360028800-T1-p1	NOL1/NOP2/sun family - putative	19	3707500	3723800	3716300	3.71587e+06	1651
LINF_320019300-T1-p1	LINF_320019300-T1-p1	RNA guanylyltransferase - putative	14	3577200	3782800	3772100	3710700	1652
LINF_030014200-T1-p1	LINF_030014200-T1-p1	inorganic pyrophosphatase - putative	11	4082400	3508900	3529600	3.70697e+06	1653
LINF_340022800-T1-p1	LINF_340022800-T1-p1	ubiquitin-conjugating enzyme E2 - putative	2	4094200	2560100	4466400	3706900	1654
LINF_330025200-T1-p1	LINF_330025200-T1-p1	thiamine biosynthesis-like protein	20	3495200	3755000	3868200	3.70613e+06	1655
LINF_160018800-T1-p1	LINF_160018800-T1-p1	hypothetical protein - conserved	4	3273000	4277200	3561400	3.70387e+06	1656
LINF_260014300-T1-p1	LINF_260014300-T1-p1	DnaJ domain/Domain of unknown function (DUF3395) - putative	22	3685100	3928300	3492200	3.70187e+06	1657
LINF_240010700-T1-p1	LINF_240010700-T1-p1	hypothetical protein - conserved	14	3573800	3556800	3969300	3.69997e+06	1658
LINF_330036600-T1-p1	LINF_330036600-T1-p1	MRB1-associated protein	13	3532600	3744300	3814000	3.69697e+06	1659
LINF_250025900-T1-p1	LINF_250025900-T1-p1	phosphopantothenate--cysteine ligase - putative	9	3450500	3694300	3936700	3.69383e+06	1660
LINF_160014100-T1-p1	LINF_160014100-T1-p1	hypothetical protein - conserved	5	3592600	3700600	3786400	3693200	1661
LINF_140018300-T1-p1	LINF_140018300-T1-p1	YjeF-related protein N-terminus/Carbohydrate kinase - putative	11	3206500	3743100	4128600	3.69273e+06	1662
LINF_260028000-T1-p1	LINF_260028000-T1-p1	Sec1/Munc18 related protein - putative	13	3733900	3761800	3571000	3688900	1663
LINF_360041800-T1-p1	LINF_360041800-T1-p1	hypothetical protein - conserved	6	3703300	4080300	3282300	3.68863e+06	1664
LINF_130012700-T1-p1	LINF_130012700-T1-p1	protein kinase - putative	13	3809900	3633100	3616800	3686600	1665
LINF_350015900-T1-p1	LINF_350015900-T1-p1	hypothetical protein	3	3604200	3837900	3608700	3683600	1666
LINF_200021400-T1-p1	LINF_200021400-T1-p1	SNAP protein - putative	4	3452200	3865000	3732300	3.68317e+06	1667
LINF_040015000-T1-p1	LINF_040015000-T1-p1	hypothetical protein - conserved	6	3714000	3985800	3339300	3679700	1668
LINF_350036000-T1-p1	LINF_350036000-T1-p1	hypothetical protein - conserved	18	3395900	3701500	3941700	3679700	1669
LINF_290011800-T1-p1	LINF_290011800-T1-p1	Triple RNA binding domain protein 3	10	4054100	3566600	3416000	3678900	1670
LINF_200012000-T1-p1	LINF_200012000-T1-p1	hypothetical protein - conserved	3	3263500	3646300	4109100	3.67297e+06	1671
LINF_320006800-T1-p1	LINF_320006800-T1-p1	U2 small nuclear ribonucleoprotein 40K - putative	6	3239200	4062900	3701300	3667800	1672
LINF_280025900-T1-p1	LINF_280025900-T1-p1	divalent cation transporter - putative	7	4017400	3055100	3924200	3.66557e+06	1673
LINF_340049400-T1-p1	LINF_340049400-T1-p1	dynein heavy chain - putative	55	3565800	3623200	3803400	3.66413e+06	1674
LINF_360011200-T1-p1	LINF_360011200-T1-p1	Elongation factor G1 - mitochondrial - putative	19	3483200	3459100	4031500	3.65793e+06	1676
LINF_350024700-T1-p1	LINF_350024700-T1-p1	UBX domain containing protein - putative	5	3713700	3522300	3736500	3657500	1677
LINF_150017400-T1-p1	LINF_150017400-T1-p1	calmodulin-like protein	10	3703700	3433000	3774300	3637000	1678
LINF_190010700-T1-p1	LINF_190010700-T1-p1	Tubulin binding cofactor C - putative	9	3745800	3169600	3993600	3.63633e+06	1679
LINF_360054500-T1-p1	LINF_360054500-T1-p1	hypothetical protein - conserved	19	3477000	3608900	3786400	3624100	1680
LINF_340041300-T1-p1	LINF_340041300-T1-p1	DNA topoisomerase IB - large subunit	16	3618900	3488100	3759700	3.62223e+06	1681
LINF_100019000-T1-p1	LINF_100019000-T1-p1	small GTP-binding protein Rab7 - putative	8	3568600	3659300	3633800	3.62057e+06	1682
LINF_180016300-T1-p1	LINF_180016300-T1-p1	cAMP phosphodiesterase A - putative	13	3463300	3679800	3694900	3.61267e+06	1683
LINF_050013400-T1-p1	LINF_050013400-T1-p1	hypothetical protein - conserved	21	3634100	3497700	3689500	3607100	1684
LINF_320009500-T1-p1	LINF_320009500-T1-p1	Protein of unknown function (DUF1279) - putative	4	3387600	3437200	3977300	3600700	1685
LINF_360048800-T1-p1	LINF_360048800-T1-p1	RNA polymerase-associated protein CDC73 - putative	6	3912100	3451600	3436600	3600100	1686
LINF_250009300-T1-p1	LINF_250009300-T1-p1	Translation initiation factor SUI1 - putative	7	3550500	3847300	3398000	3598600	1687
LINF_210005900-T1-p1	LINF_210005900-T1-p1	WD domain - G-beta repeat - putative	8	3980300	3596000	3202200	3.59283e+06	1688
LINF_280028300-T1-p1	LINF_280028300-T1-p1	Methyltransferase domain containing protein - putative	11	3791500	3642800	3343500	3592600	1689
LINF_320028500-T1-p1	LINF_320028500-T1-p1	hypothetical protein - conserved	13	3578300	3534800	3664600	3.59257e+06	1690
LINF_360028700-T1-p1	LINF_360028700-T1-p1	dynein light chain - putative	3	3673700	3467300	3631100	3590700	1691
LINF_320039000-T1-p1	LINF_320039000-T1-p1	Flagellar Member 7	11	3748700	3312000	3683700	3.58147e+06	1692
LINF_350014200-T1-p1	LINF_350014200-T1-p1	cell cycle sequence binding phosphoprotein (RBP33) - putative	10	3657500	3373900	3704100	3578500	1693
LINF_350048800-T1-p1	LINF_350048800-T1-p1	hypothetical protein - conserved	4	3793000	3514600	3417900	3.57517e+06	1694
LINF_020008100-T1-p1	LINF_020008100-T1-p1	Soluble NSF attachment protein - SNAP - putative	16	3769700	3338900	3593800	3.56747e+06	1695
LINF_050015850-T1-p1	LINF_050015850-T1-p1	hypothetical protein	14	3348800	3725500	3618800	3.56437e+06	1696
LINF_360055700-T1-p1	LINF_360055700-T1-p1	Ham1 family - putative	8	3764000	3637000	3283600	3.56153e+06	1697
LINF_220007100-T1-p1	LINF_220007100-T1-p1	Domain of unknown function (DUF1736) - putative	6	3483700	3665800	3506700	3.55207e+06	1698
LINF_310036000-T1-p1	LINF_310036000-T1-p1	Endoplasmic Reticulum-Golgi Intermediate Compartment (ERGIC)/Endoplasmic reticulum vesicle transporter - putative | transcript_pro	5	4146200	3423200	3085200	3.55153e+06	1699
LINF_360034600-T1-p1	LINF_360034600-T1-p1	hypothetical protein - conserved	10	3648000	3518600	3458600	3.54173e+06	1700
LINF_130018700-T1-p1	LINF_130018700-T1-p1	AAA domain/Dpy-30 motif containing protein - putative	13	3426100	3663100	3530500	3539900	1701
LINF_180015400-T1-p1	LINF_180015400-T1-p1	Dynein light chain roadblock-type protein - putative	6	3904300	3155800	3535300	3531800	1702
LINF_320013400-T1-p1	LINF_320013400-T1-p1	hypothetical protein - conserved	5	3614300	3625700	3336600	3.52553e+06	1703
LINF_100014600-T1-p1	LINF_100014600-T1-p1	hypothetical protein - conserved	3	760500	4959700	4848800	3523000	1704
LINF_310012600-T1-p1	LINF_310012600-T1-p1	hypothetical protein - conserved	4	3098100	3441300	4022200	3.52053e+06	1705
LINF_290009200-T1-p1	LINF_290009200-T1-p1	hypothetical protein - conserved	8	3448000	4041600	3065900	3518500	1706
LINF_250016000-T1-p1	LINF_250016000-T1-p1	2OG-Fe(II) oxygenase superfamily - putative	8	3487500	3574600	3492600	3.51823e+06	1707
LINF_280019300-T1-p1	LINF_280019300-T1-p1	haloacid dehalogenase-like hydrolase-like protein	9	3519300	3737300	3294700	3517100	1708
LINF_360081200-T1-p1	LINF_360081200-T1-p1	Ribosomal protein L1p/L10e family - putative	10	3436500	3338200	3760500	3.51173e+06	1709
LINF_190012800-T1-p1	LINF_190012800-T1-p1	signal recognition particle protein - putative	16	3349800	3865200	3313800	3509600	1710
LINF_350011400-T1-p1	LINF_350011400-T1-p1	hypothetical protein - conserved	5	4074500	2616600	3821000	3.50403e+06	1711
LINF_030014400-T1-p1	LINF_030014400-T1-p1	Amidohydrolase/Amidohydrolase family - putative	17	3635400	3661000	3211000	3.50247e+06	1712
LINF_090014100-T1-p1	LINF_090014100-T1-p1	hypothetical protein - conserved	17	3393800	3610300	3488600	3.49757e+06	1713
LINF_110014600-T1-p1	LINF_110014600-T1-p1	Leucine Rich repeat - putative	16	3500200	3514100	3477200	3.49717e+06	1714
LINF_070018100-T1-p1	LINF_070018100-T1-p1	hypothetical protein - conserved	11	3615800	3229500	3640100	3.49513e+06	1715
LINF_220008100-T1-p1	LINF_220008100-T1-p1	carnitine palmitoyltransferase-like protein	9	3355200	3503700	3603000	3487300	1716
LINF_050015400-T1-p1	LINF_050015400-T1-p1	hypothetical protein - conserved	1	3666800	3458700	3336300	3.48727e+06	1717
LINF_050005700-T1-p1	LINF_050005700-T1-p1	Rrp15p - putative	3	3541400	3596900	3306800	3481700	1718
LINF_360058600-T1-p1	LINF_360058600-T1-p1	hypothetical protein - conserved	17	3336100	3548600	3541100	3.47527e+06	1719
LINF_340037900-T1-p1	LINF_340037900-T1-p1;LINF_340037400-T1-p1	exosome subunit rrp6p homologue - putative	12	3390400	3316400	3716900	3.47457e+06	1720
LINF_190022400-T1-p1	LINF_190022400-T1-p1	SRP19 protein - putative	4	3657600	3014800	3741100	3.47117e+06	1721
LINF_300024600-T1-p1	LINF_300024600-T1-p1	C2H2 type zinc-finger (2 copies) - putative	4	3122300	3428700	3857500	3469500	1722
LINF_190012100-T1-p1	LINF_190012100-T1-p1	hypothetical protein - conserved	7	3757600	3425600	3220700	3.46797e+06	1723
LINF_300032800-T1-p1	LINF_300032800-T1-p1	Translation machinery associated TMA7 - putative	1	3909400	3789500	2701400	3.46677e+06	1724
LINF_340045400-T1-p1	LINF_340045400-T1-p1	phosphomannomutase-like protein	12	3342500	3700500	3356700	3.46657e+06	1725
LINF_360061200-T1-p1	LINF_360061200-T1-p1	vacuolar protein sorting-associated protein-like protein	4	3456900	3316200	3616900	3.46333e+06	1726
LINF_090013600-T1-p1	LINF_090013600-T1-p1	ubiquitin ligase - putative	28	3298300	3084900	4006000	3.46307e+06	1727
LINF_300031900-T1-p1	LINF_300031900-T1-p1	hypothetical protein - conserved	6	3605300	3357400	3420500	3.46107e+06	1728
LINF_130011700-T1-p1	LINF_130011700-T1-p1	Metallopeptidase family M24 - putative	15	3498600	3405400	3455800	3.45327e+06	1729
LINF_300041100-T1-p1	LINF_300041100-T1-p1	thiosulfate sulfurtransferase - mitochondrial - putative	5	3025100	3824700	3504100	3451300	1730
LINF_330032500-T1-p1	LINF_330032500-T1-p1	Rab-GTPase-TBC domain containing protein - putative	22	3350400	3326900	3662900	3.44673e+06	1731
LINF_300006900-T1-p1	LINF_300006900-T1-p1	hypothetical protein - conserved	6	3166500	3553700	3609900	3.44337e+06	1732
LINF_330033800-T1-p1	LINF_330033800-T1-p1	hypothetical protein - conserved	18	3446400	3442600	3430800	3.43993e+06	1733
LINF_290011600-T1-p1	LINF_290011600-T1-p1	flagellar radial spoke protein-like - putative	7	3209700	3573200	3536800	3439900	1734
LINF_170013800-T1-p1	LINF_170013800-T1-p1	VID27 cytoplasmic protein - putative	8	3494000	3337600	3480300	3437300	1735
LINF_330034400-T1-p1	LINF_330034400-T1-p1	UDP-N-acetylglucosamine pyrophosphorylase - putative	11	3665300	3320000	3325100	3436800	1736
LINF_160022100-T1-p1	LINF_160022100-T1-p1	eukaryotic translation initiation factor 4 gamma - putative	14	3355300	3656700	3277300	3.42977e+06	1737
LINF_310010500-T1-p1	LINF_310010500-T1-p1	DnaJ domain containing protein - putative	8	3293400	3449200	3540900	3.42783e+06	1738
LINF_240025500-T1-p1	LINF_240025500-T1-p1	hypothetical protein - conserved	9	3469100	3332800	3479500	3.42713e+06	1739
LINF_180008500-T1-p1	LINF_180008500-T1-p1	ATP12 chaperone protein - putative	8	3489200	3071000	3706900	3.42237e+06	1740
LINF_280027300-T1-p1	LINF_280027300-T1-p1	Telomere recombination/Putative GTP-binding controlling metal-binding - putative	5	3279700	3556000	3422600	3.41943e+06	1741
LINF_260026600-T1-p1	LINF_260026600-T1-p1	hypothetical protein - conserved	3	3467000	3483100	3285800	3.41197e+06	1742
LINF_220022100-T1-p1	LINF_220022100-T1-p1	exosome complex exonuclease RRP45 homolog - putative	8	3295200	3861300	3078700	3.41173e+06	1743
LINF_200009200-T1-p1	LINF_200009200-T1-p1	NUDIX domain containing protein - putative	6	3405500	3333300	3487900	3408900	1744
LINF_330031600-T1-p1	LINF_330031600-T1-p1	glycosyl hydrolase-like protein	7	3271800	3429900	3508200	3403300	1745
LINF_280016700-T1-p1	LINF_280016700-T1-p1	Ubiquitin family - putative	12	3481100	3207600	3512200	3400300	1746
LINF_350045600-T1-p1	LINF_350045600-T1-p1;LINF_350045100-T1-p1	protein kinase A catalytic subunit isoform 1	7	3141300	3507000	3542900	3.39707e+06	1747
LINF_360034900-T1-p1	LINF_360034900-T1-p1	hypothetical protein - conserved	8	3415900	2995100	3775000	3.39533e+06	1748
LINF_250030300-T1-p1	LINF_250030300-T1-p1	hypothetical protein - conserved	8	3558500	3278300	3334800	3.39053e+06	1749
LINF_180020100-T1-p1	LINF_180020100-T1-p1	WD domain - G-beta repeat - putative	7	3641000	3303000	3218200	3387400	1750
LINF_270005500-T1-p1	LINF_270005500-T1-p1	hypothetical protein - conserved	2	3403400	3567900	3162200	3.37783e+06	1751
LINF_160021400-T1-p1	LINF_160021400-T1-p1	endoplasmic reticulum oxidoreductin - putative	5	3055900	3591400	3476000	3.37443e+06	1752
LINF_190008100-T1-p1	LINF_190008100-T1-p1	intraflagellar transport protein 52 - putative	16	3422700	3160100	3525800	3.36953e+06	1753
LINF_260028100-T1-p1	LINF_260028100-T1-p1	hypothetical protein - conserved	5	3454100	3343600	3290300	3.36267e+06	1754
LINF_330010500-T1-p1	LINF_330010500-T1-p1	DNA mismatch repair protein MSH2 - putative	17	3273600	3138600	3675800	3.36267e+06	1755
LINF_210025400-T1-p1	LINF_210025400-T1-p1	hypothetical protein - conserved	6	3389500	3580100	3075100	3.34823e+06	1756
LINF_190017300-T1-p1	LINF_190017300-T1-p1	CHCH domain containing protein - putative	1	3446000	3510200	3087300	3.34783e+06	1757
LINF_070014700-T1-p1	LINF_070014700-T1-p1	ubiquitin-conjugating enzyme E2 - putative	8	3415700	3113500	3507200	3.34547e+06	1758
LINF_280039700-T1-p1	LINF_280039700-T1-p1	hypothetical protein - conserved	5	3292600	3294700	3435500	3.34093e+06	1759
LINF_100020900-T1-p1	LINF_100020900-T1-p1	Protein of unknown function (DUF1861) - putative	7	2899100	3783400	3336300	3339600	1760
LINF_270007400-T1-p1	LINF_270007400-T1-p1;LINF_270007200-T1-p1	hypothetical protein - conserved	5	3301200	2887800	3829100	3.33937e+06	1761
LINF_360042200-T1-p1	LINF_360042200-T1-p1	Bromodomain - putative	7	3251000	2965000	3794200	3.33673e+06	1762
LINF_360062000-T1-p1	LINF_360062000-T1-p1	hypothetical protein - conserved	5	3835500	3093000	3071800	3.33343e+06	1763
LINF_060007800-T1-p1	LINF_060007800-T1-p1	hypothetical protein - conserved	7	3124700	3535100	3339200	3333000	1764
LINF_220011900-T1-p1	LINF_220011900-T1-p1	guide RNA associated protein - GAP2 - putative	11	3132000	3291600	3575000	3.33287e+06	1765
LINF_160007700-T1-p1	LINF_160007700-T1-p1	Ankyrin repeats (3 copies)/Ankyrin repeats (many copies)/Ankyrin repeat/Alpha/beta hydrolase family - putative | transcript_produc	9	3231800	3280300	3476800	3.32963e+06	1766
LINF_200021900-T1-p1	LINF_200021900-T1-p1	hypothetical protein - conserved	5	3121100	2690300	4176900	3.32943e+06	1767
LINF_140018400-T1-p1	LINF_140018400-T1-p1	phosphatidylserine synthase - putative	6	3342300	3421800	3198600	3320900	1768
LINF_300037400-T1-p1	LINF_300037400-T1-p1	RNA recognition motif. (a.k.a. RRM - RBD - or RNP domain)/RNA recognition motif (a.k.a. RRM - RBD - or RNP domain) - putative | tr	5	2904000	3199200	3855600	3319600	1769
LINF_140012800-T1-p1	LINF_140012800-T1-p1;LINF_140012600-T1-p1	fatty acid elongase - putative	5	3122200	3451700	3377400	3317100	1770
LINF_360017100-T1-p1	LINF_360017100-T1-p1	hypothetical protein - conserved	6	3187900	3262800	3498000	3.31623e+06	1771
LINF_010007300-T1-p1	LINF_010007300-T1-p1	DNA excision/repair protein SNF2 - putative	1	2954700	3538300	3447300	3.31343e+06	1772
LINF_280027000-T1-p1	LINF_280027000-T1-p1	DPCD protein family - putative	5	3124200	3196400	3617000	3.31253e+06	1773
LINF_320011100-T1-p1	LINF_320011100-T1-p1	hypothetical protein - conserved	3	3108100	3390100	3435700	3311300	1774
LINF_140010000-T1-p1	LINF_140010000-T1-p1	cystathionine beta-lyase-like protein	8	3327000	3248400	3356600	3.31067e+06	1775
LINF_180008300-T1-p1	LINF_180008300-T1-p1	DnaJ domain containing protein - putative	1	3074800	3471000	3375500	3307100	1776
LINF_320008700-T1-p1	LINF_320008700-T1-p1	hypothetical protein - conserved	13	3453000	3368700	3097000	3.30623e+06	1777
LINF_030006300-T1-p1	LINF_030006300-T1-p1	hypothetical protein - conserved	12	3312600	3337900	3264200	3304900	1778
LINF_180011400-T1-p1	LINF_180011400-T1-p1	ATP-dependent zinc metallopeptidase - putative	17	3175300	3281900	3455200	3.30413e+06	1779
LINF_320031100-T1-p1	LINF_320031100-T1-p1	mitochondrial RNA binding complex 1 subunit - putative	5	3252000	3329600	3327500	3.30303e+06	1780
LINF_250006800-T1-p1	LINF_250006800-T1-p1	cleavage and polyadenylation specificity factor - putative	19	3201300	3356900	3350600	3.30293e+06	1781
LINF_360017500-T1-p1	LINF_360017500-T1-p1	hypothetical protein - conserved	13	3272000	3038100	3590500	3300200	1782
LINF_230021200-T1-p1	LINF_230021200-T1-p1	hypothetical protein - conserved	3	3508900	3309800	3081800	3.30017e+06	1783
LINF_320016000-T1-p1	LINF_320016000-T1-p1	Maf-like protein - putative	5	3150400	3419100	3330300	3.29993e+06	1784
LINF_080013100-T1-p1	LINF_080013100-T1-p1	hypothetical protein - conserved	10	3175200	3145400	3577200	3.29927e+06	1785
LINF_090013400-T1-p1	LINF_090013400-T1-p1	cleavage and polyadenylation specificity factor 30 kDa subunit - putative	10	3102100	3551900	3233600	3.29587e+06	1786
LINF_300009900-T1-p1	LINF_300009900-T1-p1	bystin - putative	8	3034200	3072400	3777900	3.29483e+06	1787
LINF_220015800-T1-p1	LINF_220015800-T1-p1	hypothetical protein - conserved	8	3326600	3134800	3406100	3.28917e+06	1788
LINF_260019200-T1-p1	LINF_260019200-T1-p1	MORN repeat/FYVE zinc finger containing protein - putative	23	3379900	3102400	3374100	3.28547e+06	1789
LINF_190011400-T1-p1	LINF_190011400-T1-p1	hypothetical protein - conserved	27	3107700	3304600	3436600	3.28297e+06	1790
LINF_240012300-T1-p1	LINF_240012300-T1-p1	signal recognition particle - putative	15	3148200	3349800	3338600	3.27887e+06	1791
LINF_160019500-T1-p1	LINF_160019500-T1-p1	hypothetical protein - conserved	2	3443000	3480600	2892000	3.27187e+06	1792
LINF_040011700-T1-p1	LINF_040011700-T1-p1;LINF_040011800-T1-p1	hypothetical protein - conserved	2	1738700	3821200	4235500	3.26513e+06	1793
LINF_110015300-T1-p1	LINF_110015300-T1-p1	hypothetical protein - conserved	5	2914500	3204300	3675700	3.26483e+06	1794
LINF_290030900-T1-p1	LINF_290030900-T1-p1	mitogen-activated protein kinase kinase - putative	11	3198100	3225400	3370200	3.26457e+06	1795
LINF_360008900-T1-p1	LINF_360008900-T1-p1	phosphatidylinositol-4-phosphate 5-kinase-like protein	4	3164100	3323200	3303500	3263600	1796
LINF_360023900-T1-p1	LINF_360023900-T1-p1	hypothetical protein - conserved	10	3205000	3162700	3412100	3.25993e+06	1797
LINF_300035300-T1-p1	LINF_300035300-T1-p1	Protein of unknown function (DUF2817) - putative	6	3169400	3294000	3313100	3.25883e+06	1798
LINF_350028400-T1-p1	LINF_350028400-T1-p1	hypothetical protein - conserved	5	3122600	3203500	3445100	3.25707e+06	1799
LINF_200022400-T1-p1	LINF_200022400-T1-p1	hypothetical protein - conserved	1	3329500	3602500	2833300	3255100	1800
LINF_300035800-T1-p1	LINF_300035800-T1-p1	hypothetical protein - conserved	3	3477800	3532400	2741400	3.25053e+06	1801
LINF_230008600-T1-p1	LINF_230008600-T1-p1	hypothetical protein - conserved	4	3267900	2783300	3691000	3247400	1802
LINF_310032800-T1-p1	LINF_310032800-T1-p1	hypothetical protein - conserved	5	3288600	3318200	3120900	3.24257e+06	1803
LINF_360046000-T1-p1	LINF_360046000-T1-p1	hypothetical protein - conserved	6	3181000	3351800	3189500	3.24077e+06	1804
LINF_200012700-T1-p1	LINF_200012700-T1-p1	Tubulin/FtsZ family - putative	9	3523300	2701700	3486100	3.23703e+06	1805
LINF_200021600-T1-p1	LINF_200021600-T1-p1	tRNA (Uracil-5-)-methyltransferase/Protein-L-isoaspartate(D-aspartate) O-methyltransferase (PCMT)/ubiE/COQ5 methyltransferase fami	13	2896600	3319300	3477100	3231000	1806
LINF_100007500-T1-p1	LINF_100007500-T1-p1	hypothetical protein - conserved	3	2864000	3337700	3486500	3229400	1807
LINF_280036400-T1-p1	LINF_280036400-T1-p1	heat shock protein 70 - putative	13	3310800	3152300	3202400	3.22183e+06	1808
LINF_240005100-T1-p1	LINF_240005100-T1-p1	hypothetical protein - conserved	6	2966900	3042200	3653000	3220700	1809
LINF_320014900-T1-p1	LINF_320014900-T1-p1	FAD dependent oxidoreductase - putative	12	3308600	3226100	3110100	3.21493e+06	1810
LINF_220008800-T1-p1	LINF_220008800-T1-p1	hypothetical protein - conserved	23	3094600	3177600	3368700	3.21363e+06	1811
LINF_150020800-T1-p1	LINF_150020800-T1-p1	ubiquitin hydrolase - putative	35	3255400	3222300	3157200	3.21163e+06	1812
LINF_230005900-T1-p1	LINF_230005900-T1-p1	Domain of unknown function (DUF1767) - putative	9	3216100	3052000	3361600	3209900	1813
LINF_310016400-T1-p1	LINF_310016400-T1-p1	RNA recognition motif. (a.k.a. RRM - RBD - or RNP domain) - putative	4	2199000	4640200	2777900	3205700	1814
LINF_320047050-T1-p1	LINF_320047050-T1-p1	GIPL galf transferase - putative	10	3193500	3173100	3247500	3204700	1815
LINF_100018800-T1-p1	LINF_100018800-T1-p1	Tumour suppressor - Mitostatin - putative	10	3347100	3445900	2818100	3203700	1816
LINF_320045200-T1-p1	LINF_320045200-T1-p1	Tetratricopeptide repeat - putative	5	3239700	3275700	3094900	3.20343e+06	1817
LINF_320044000-T1-p1	LINF_320044000-T1-p1	3-hydroxyisobutyryl-coenzyme A hydrolase - putative	8	3167400	3119600	3318400	3201800	1818
lncRNA.LinJ.32.1536380-1540859.ORF_1	lncRNA.LinJ.32.1536380-1540859.ORF_1	lncRNA.LinJ.32.1536380-1540859.ORF_1	5	3243900	3135700	3217300	3.19897e+06	1819
LINF_150005400-T1-p1	LINF_150005400-T1-p1	cytochrome-b5 reductase - putative	13	2713400	3275700	3601100	3.19673e+06	1820
LINF_030011300-T1-p1	LINF_030011300-T1-p1	hypothetical protein - conserved	11	2949400	3422800	3205700	3.19263e+06	1821
LINF_300010300-T1-p1	LINF_300010300-T1-p1	N-acetyltransferase B complex (NatB) non catalytic subunit - putative	23	3079100	3435500	3055800	3.19013e+06	1822
LINF_130014000-T1-p1	LINF_130014000-T1-p1	Leucine Rich repeat - putative	4	2702900	3252300	3604500	3.18657e+06	1823
LINF_320026300-T1-p1	LINF_320026300-T1-p1	cop-coated vesicle membrane protein p24 precursor - putative	2	3079400	3192800	3279900	3.18403e+06	1824
LINF_330027700-T1-p1	LINF_330027700-T1-p1	ribosome assembly protein RRB1 - putative	11	3283900	3205600	3061100	3.18353e+06	1825
LINF_030008200-T1-p1	LINF_030008200-T1-p1	DDRGK domain containing protein - putative	5	4341200	2781900	2426600	3.18323e+06	1826
LINF_310031800-T1-p1	LINF_310031800-T1-p1	Symplekin tight junction protein C terminal - putative	36	3092800	3108100	3348200	3.18303e+06	1827
LINF_060014500-T1-p1	LINF_060014500-T1-p1	acyl-coenzyme a dehydrogenase - putative	5	3220700	3513800	2810700	3.18173e+06	1828
LINF_070007800-T1-p1	LINF_070007800-T1-p1	homoserine dehydrogenase-like protein	6	3218300	3245800	3080600	3.18157e+06	1829
LINF_170019900-T1-p1	LINF_170019900-T1-p1	Organic solute transport protein 1 - putative	3	3236900	3050300	3246800	3178000	1830
LINF_170019800-T1-p1	LINF_170019800-T1-p1	Domain of unknown function (DUF1726)/Helicase/GNAT acetyltransferase 2/Possible tRNA binding domain containing protein - putative	26	3056900	3279600	3190400	3.17563e+06	1831
LINF_270031800-T1-p1	LINF_270031800-T1-p1	hypothetical protein - conserved	13	3179100	3068800	3275900	3174600	1832
LINF_010009900-T1-p1	LINF_010009900-T1-p1	beta eliminating lyase -putative	13	3012700	3121000	3387200	3.17363e+06	1833
LINF_290031800-T1-p1	LINF_290031800-T1-p1	Acyltransferase - putative	6	2929100	3186300	3401400	3.17227e+06	1834
LINF_360006300-T1-p1	LINF_360006300-T1-p1	PUB domain containing protein - putative	2	2881300	2935600	3688400	3.16843e+06	1835
LINF_250007300-T1-p1	LINF_250007300-T1-p1	hypothetical protein - conserved	8	3085100	3130600	3280200	3165300	1836
LINF_350036400-T1-p1	LINF_350036400-T1-p1	hypothetical protein - conserved	6	3049900	3210800	3230000	3.16357e+06	1837
LINF_300020100-T1-p1	LINF_300020100-T1-p1	kinesin - putative	21	3062600	3164500	3248500	3.15853e+06	1838
LINF_290018900-T1-p1	LINF_290018900-T1-p1	hypothetical protein - conserved	5	3258900	3159900	3054100	3.15763e+06	1839
LINF_300009400-T1-p1	LINF_300009400-T1-p1	quiescin sulfhydryl oxidase - putative	5	3372700	2916400	3172400	3.15383e+06	1840
LINF_300005800-T1-p1	LINF_300005800-T1-p1	mitotic cyclin - putative	9	2843300	3247500	3363900	3.15157e+06	1841
LINF_340030900-T1-p1	LINF_340030900-T1-p1	protein phosphatase 2C-like protein	9	3102600	3081400	3262900	3.14897e+06	1842
LINF_240006300-T1-p1	LINF_240006300-T1-p1	hypothetical protein - conserved	7	3171600	3249300	2989700	3.13687e+06	1843
LINF_300029400-T1-p1	LINF_300029400-T1-p1	hypothetical protein - conserved	8	2977500	3401500	3027500	3135500	1844
LINF_030005200-T1-p1	LINF_030005200-T1-p1	D-3-phosphoglycerate dehydrogenase-like protein	10	2989500	3243300	3171000	3134600	1845
LINF_180010500-T1-p1	LINF_180010500-T1-p1	hypothetical protein - conserved	6	3109200	2910300	3371200	3.13023e+06	1846
LINF_120012200-T1-p1	LINF_120012200-T1-p1	Leucine Rich repeat - putative	8	2958600	2959400	3471400	3129800	1847
LINF_210023600-T1-p1	LINF_210023600-T1-p1	hypothetical protein - conserved	15	2921100	3316100	3136300	3124500	1848
LINF_310039400-T1-p1	LINF_310039400-T1-p1	Putative cyclase - putative	3	3206600	3257900	2889800	3118100	1849
LINF_250016900-T1-p1	LINF_250016900-T1-p1	hypothetical protein - conserved	9	3013800	3225100	3115100	3118000	1850
LINF_250008000-T1-p1	LINF_250008000-T1-p1	RNA-binding protein - putative	14	3221300	3077100	3039000	3.11247e+06	1851
LINF_290018000-T1-p1	LINF_290018000-T1-p1	hypothetical protein - conserved	5	2804100	3232800	3297800	3.11157e+06	1852
LINF_340032000-T1-p1	LINF_340032000-T1-p1	acyl-CoA binding protein - putative	1	2635400	2663000	4031600	3110000	1853
LINF_070011100-T1-p1	LINF_070011100-T1-p1	ras-related protein rab-14 - putative	4	2828600	3353400	3146700	3.10957e+06	1854
LINF_010009600-T1-p1	LINF_010009600-T1-p1	nicotinamidase - putative	1	3193900	2984800	3148200	3.10897e+06	1855
LINF_310005300-T1-p1	LINF_310005300-T1-p1	BT1 family/MFS/sugar transport protein - putative	2	4670600	4489500	143172	3.10109e+06	1856
LINF_280007900-T1-p1	LINF_280007900-T1-p1	DIS3-like exonuclease - putative	17	2983200	2931000	3386900	3.10037e+06	1857
LINF_300038300-T1-p1	LINF_300038300-T1-p1	Ankyrin repeats (3 copies)/Ankyrin repeats (many copies)/Ankyrin repeat - putative	7	2727500	3044300	3517700	3096500	1858
LINF_280022200-T1-p1	LINF_280022200-T1-p1	Kelch motif/Galactose oxidase - central domain containing protein - putative	4	2914400	3222100	3142600	3.09303e+06	1859
LINF_350037400-T1-p1	LINF_350037400-T1-p1	RNA-binding protein - putative	9	2799200	3019400	3449100	3.08923e+06	1860
LINF_300013200-T1-p1	LINF_300013200-T1-p1	mitochondrial oligo U binding protein TBRGG1 - putative	15	2954300	2999400	3311800	3088500	1861
LINF_180005900-T1-p1	LINF_180005900-T1-p1	alpha glucosidase II subunit - putative	16	2860000	3072300	3307600	3.07997e+06	1862
LINF_320044700-T1-p1	LINF_320044700-T1-p1	Methyltransferase TYW3 - putative	5	3040800	2840600	3358500	3.07997e+06	1863
LINF_290035100-T1-p1	LINF_290035100-T1-p1	START domain containing protein - putative	6	3088400	3276500	2872300	3.07907e+06	1864
LINF_090020000-T1-p1	LINF_090020000-T1-p1	Bromodomain - putative	9	2844600	3223300	3160100	3076000	1865
LINF_220007500-T1-p1	LINF_220007500-T1-p1	Translocon-associated protein (TRAP) - alpha subunit - putative	3	3691800	3165800	2346300	3.06797e+06	1866
LINF_340008700-T1-p1	LINF_340008700-T1-p1	DNA-directed RNA polymerase III subunit C1 - putative	15	2957500	3128500	3115000	3067000	1867
LINF_330024600-T1-p1	LINF_330024600-T1-p1	hypothetical protein - conserved	20	2872600	3056200	3258300	3.06237e+06	1868
LINF_350020700-T1-p1	LINF_350020700-T1-p1	Methyltransferase domain/ubiE/COQ5 methyltransferase family - putative	6	3369100	2746000	3070300	3061800	1869
LINF_250022000-T1-p1	LINF_250022000-T1-p1	Tim10/DDP family zinc finger containing protein - putative	2	2867500	3154700	3158700	3060300	1870
LINF_280026200-T1-p1	LINF_280026200-T1-p1	ribose 5-phosphate isomerase - putative	9	3021200	3308300	2848800	3.05943e+06	1871
LINF_320028300-T1-p1	LINF_320028300-T1-p1	U5 small nuclear ribonucleoprotein component - putative	22	3154700	2961700	3058900	3.05843e+06	1872
LINF_330025400-T1-p1	LINF_330025400-T1-p1	DNA polymerase delta catalytic subunit - putative	10	2644500	2842600	3682400	3056500	1873
LINF_320007600-T1-p1	LINF_320007600-T1-p1	hypothetical protein - conserved	21	2977100	3051200	3139900	3.05607e+06	1874
LINF_350039000-T1-p1	LINF_350039000-T1-p1	Putative death-receptor fusion protein (DUF2428) - putative	29	2976400	2871900	3318900	3.05573e+06	1875
LINF_080006100-T1-p1	LINF_080006100-T1-p1	hypothetical protein - conserved	6	3057100	3237700	2870800	3055200	1876
LINF_070016400-T1-p1	LINF_070016400-T1-p1	Domain of unknown function DUF59 - putative	4	4256100	3051400	1857100	3.05487e+06	1877
LINF_240007200-T1-p1	LINF_240007200-T1-p1	ATP-dependent DEAD/H RNA helicase - putative	9	2972700	3024500	3134300	3.04383e+06	1878
LINF_080010200-T1-p1	LINF_080010200-T1-p1	ribose-phosphate pyrophosphokinase - putative	16	2851300	3206300	3064900	3.04083e+06	1879
LINF_360078500-T1-p1	LINF_360078500-T1-p1	Cytochrome b5-like Heme/Steroid binding domain containing protein - putative	3	2918200	2857600	3304700	3.02683e+06	1880
LINF_320039200-T1-p1	LINF_320039200-T1-p1	NADH dehydrogenase subunit NI8M - putative	4	3022000	3406400	2637100	3.02183e+06	1881
LINF_250030200-T1-p1	LINF_250030200-T1-p1	Leucine rich repeat/Leucine Rich repeats (2 copies) - putative	3	2943300	3088100	3027400	3019600	1882
LINF_070008000-T1-p1	LINF_070008000-T1-p1	ubiquitin-protein ligase-like - putative	57	3013500	2804300	3232100	3.01663e+06	1883
LINF_360075800-T1-p1	LINF_360075800-T1-p1	hypothetical protein - conserved	6	2958900	2949100	3112300	3.00677e+06	1884
LINF_350008400-T1-p1	LINF_350008400-T1-p1	3-keto-dihydrosphingosine reductase	8	3010400	3024900	2976900	3.00407e+06	1885
LINF_360079500-T1-p1	LINF_360079500-T1-p1	adaptin complex 1 subunit - putative	17	2729400	3129600	3124400	2.99447e+06	1886
LINF_260024700-T1-p1	LINF_260024700-T1-p1	Thioesterase-like superfamily/Thioesterase superfamily - putative	14	3026300	2791400	3161100	2.99293e+06	1887
LINF_290009400-T1-p1	LINF_290009400-T1-p1	hypothetical protein - conserved	5	2838300	3430100	2687400	2.98527e+06	1888
LINF_210015700-T1-p1	LINF_210015700-T1-p1	Domain of unknown function (DUF4042)/HEAT-like repeat - putative	18	3126800	2911500	2913900	2.98407e+06	1889
LINF_300009600-T1-p1	LINF_300009600-T1-p1	eukaryotic translation initiation factor 4E - putative	6	2616600	2810100	3516300	2981000	1890
LINF_140005000-T1-p1	LINF_140005000-T1-p1	exosome complex exonuclease - putative	8	3063000	3130100	2749200	2.98077e+06	1891
LINF_340014500-T1-p1	LINF_340014500-T1-p1	hypothetical protein - conserved	10	2922300	3107400	2893700	2.97447e+06	1892
LINF_050010500-T1-p1	LINF_050010500-T1-p1	LSM domain containing protein - putative	3	2819100	3133500	2964900	2972500	1893
LINF_340026000-T1-p1	LINF_340026000-T1-p1	protein kinase - putative	10	2698700	3018000	3172400	2.96303e+06	1894
LINF_070012900-T1-p1	LINF_070012900-T1-p1	HEAT-like repeat - putative	17	3158300	2726300	3003000	2.96253e+06	1895
LINF_300037800-T1-p1	LINF_300037800-T1-p1	hypothetical protein - conserved	11	2561900	2892300	3415100	2.95643e+06	1896
LINF_240017400-T1-p1	LINF_240017400-T1-p1	RNA-binding protein 38 - putative	4	3032800	2702700	3133200	2.95623e+06	1897
LINF_360042400-T1-p1	LINF_360042400-T1-p1	hypothetical protein - conserved	4	2883700	2825600	3153900	2954400	1898
LINF_180011700-T1-p1	LINF_180011700-T1-p1	serine/threonine kinase-like protein - putative	2	3118000	2209300	3530400	2.95257e+06	1899
LINF_290007800-T1-p1	LINF_290007800-T1-p1	D-lactate dehydrogenase-like protein	6	2778500	2850600	3224200	2951100	1900
LINF_070015700-T1-p1	LINF_070015700-T1-p1	Domain of unknown function (DUF3437) - putative	16	2973600	2875600	2997600	2.94893e+06	1901
LINF_230024000-T1-p1	LINF_230024000-T1-p1	hypothetical protein - conserved	6	3090400	2895500	2860800	2948900	1902
LINF_100019200-T1-p1	LINF_100019200-T1-p1	flagellar protofilament ribbon protein-like protein	8	3163600	3338600	2321800	2.94133e+06	1903
LINF_360039900-T1-p1	LINF_360039900-T1-p1	CobW/HypB/UreG - nucleotide-binding domain containing protein - putative	4	2792600	2933300	3097000	2.94097e+06	1904
LINF_200014300-T1-p1	LINF_200014300-T1-p1	cyclophilin 15 - putative	9	2845000	2902300	3055100	2.93413e+06	1905
LINF_250027700-T1-p1	LINF_250027700-T1-p1	elongation factor 2-like protein	17	2802200	3066800	2926500	2.93183e+06	1906
LINF_120006100-T1-p1	LINF_120006100-T1-p1	Plus-3 domain/Zinc finger - C3HC4 type (RING finger) containing protein - putative	5	2692700	2827400	3269700	2.92993e+06	1907
LINF_250016600-T1-p1	LINF_250016600-T1-p1	frataxin-like protein	3	2973500	2970200	2840900	2928200	1908
LINF_070005000-T1-p1	LINF_070005000-T1-p1	Ubiquitin-like modifier-activating enzyme ATG7 - putative	19	2941800	2878800	2951900	2.92417e+06	1909
LINF_180014700-T1-p1	LINF_180014700-T1-p1	Nrap protein - putative	27	2777600	3052200	2939600	2.92313e+06	1910
LINF_290009300-T1-p1	LINF_290009300-T1-p1	hypothetical protein - conserved	9	2829700	2913900	3017300	2920300	1911
LINF_360014700-T1-p1	LINF_360014700-T1-p1	SNF1-related protein kinases - putative	16	3001800	2799700	2956700	2919400	1912
LINF_240013500-T1-p1	LINF_240013500-T1-p1	hypothetical protein	5	3134900	2927200	2693400	2918500	1913
LINF_350030200-T1-p1	LINF_350030200-T1-p1	hypothetical protein - conserved	11	2944700	2795300	3006000	2.91533e+06	1914
LINF_360075700-T1-p1	LINF_360075700-T1-p1	protein transport protein Sec23-like protein	11	2795700	2926700	3022800	2.91507e+06	1915
LINF_070011600-T1-p1	LINF_070011600-T1-p1	hypothetical protein - conserved	4	2552300	2790300	3394900	2912500	1916
LINF_170017700-T1-p1	LINF_170017700-T1-p1	hydrolase-like protein	8	2949700	2961100	2821700	2.91083e+06	1917
LINF_360068000-T1-p1	LINF_360068000-T1-p1	mkiaa0324 protein-like protein	8	2519700	2956900	3247200	2.90793e+06	1918
LINF_320026800-T1-p1	LINF_320026800-T1-p1	Cytidylyltransferase - putative	12	2788100	3198000	2733400	2906500	1919
LINF_150020900-T1-p1	LINF_150020900-T1-p1	MGT1 magnesium transporter	9	2821800	2910700	2985700	2.90607e+06	1920
LINF_250018300-T1-p1	LINF_250018300-T1-p1	hypothetical protein - conserved	19	2770200	2902000	3044100	2.90543e+06	1921
LINF_210012800-T1-p1	LINF_210012800-T1-p1	hypothetical protein - conserved	3	2878000	2779600	3049400	2.90233e+06	1922
LINF_090009700-T1-p1	LINF_090009700-T1-p1	hypothetical protein - conserved	5	3007500	2809000	2884800	2.90043e+06	1923
LINF_250007800-T1-p1	LINF_250007800-T1-p1	hypothetical protein - conserved	11	2822800	2605200	3267500	2898500	1924
LINF_330031800-T1-p1	LINF_330031800-T1-p1	MYND finger containing protein - putative	14	2959700	2718100	3012200	2.89667e+06	1925
LINF_350055000-T1-p1	LINF_350055000-T1-p1	zinc finger protein family member - putative	14	2867400	3140900	2680900	2896400	1926
LINF_250019600-T1-p1	LINF_250019600-T1-p1	protein transport protein Sec24C - putative	16	2670300	2800800	3214700	2.89527e+06	1927
LINF_320034900-T1-p1	LINF_320034900-T1-p1	hypothetical protein - conserved	16	2961800	2634300	3088200	2.89477e+06	1928
LINF_230024800-T1-p1	LINF_230024800-T1-p1	exosome component CSL4 - putative	3	2878500	2977400	2820300	2.89207e+06	1929
LINF_150012700-T1-p1	LINF_150012700-T1-p1	hypothetical protein - conserved	10	2719400	2680100	3271600	2.89037e+06	1930
LINF_120010500-T1-p1	LINF_120010500-T1-p1	vacuolar ATP synthase subunit - putative	4	2971600	2825100	2863600	2.88677e+06	1931
LINF_220015400-T1-p1	LINF_220015400-T1-p1;LINF_220015300-T1-p1	mitochondrial chaperone - putative	11	2808500	2923700	2926300	2.88617e+06	1932
LINF_360063900-T1-p1	LINF_360063900-T1-p1	branch point binding protein - putative	9	2917300	2907700	2831900	2.88563e+06	1933
LINF_270006500-T1-p1	LINF_270006500-T1-p1	SET domain containing protein - putative	5	2839700	2843400	2971800	2.88497e+06	1934
LINF_050008900-T1-p1	LINF_050008900-T1-p1	protein kinase - putative	16	2721500	3002500	2925000	2883000	1935
LINF_040017100-T1-p1	LINF_040017100-T1-p1	tRNA nucleotidyltransferase - putative	9	2933700	2855200	2855600	2881500	1936
LINF_060005800-T1-p1	LINF_060005800-T1-p1;LINF_060005900-T1-p1;LINF_060006000-T1-p1;LINF_060006100-T1-p1	ATP-binding cassette protein subfamily G - member 1 - putative	11	2717800	2768900	3151500	2879400	1937
LINF_350047300-T1-p1	LINF_350047300-T1-p1	elongation factor 1-alpha - putative	8	2800500	2882000	2942300	2.87493e+06	1938
LINF_350049000-T1-p1	LINF_350049000-T1-p1	Haloacid dehalogenase-like hydrolase/HAD-hyrolase-like - putative	8	2853300	2745200	3004000	2867500	1939
LINF_070005800-T1-p1	LINF_070005800-T1-p1	Golgi/lysosome glycoprotein 1 - putative	7	3043500	2402000	3155400	2.86697e+06	1940
LINF_060012400-T1-p1	LINF_060012400-T1-p1	hypothetical protein - conserved	2	2759400	2607300	3228500	2.86507e+06	1941
LINF_160005600-T1-p1	LINF_160005600-T1-p1	peroxisome assembly protein - putative	8	2649600	3000400	2939700	2.86323e+06	1942
LINF_280014800-T1-p1	LINF_280014800-T1-p1	hypothetical protein - conserved	4	2921800	2817600	2840900	2860100	1943
LINF_270005200-T1-p1	LINF_270005200-T1-p1	Queuine tRNA-ribosyltransferase - putative	7	2688500	2735300	3152600	2858800	1944
LINF_300031400-T1-p1	LINF_300031400-T1-p1	replication factor C - subunit 2 - putative	9	2879200	2796800	2889100	2.85503e+06	1945
LINF_130011400-T1-p1	LINF_130011400-T1-p1	palmitoyl acyltransferase 6 - putative	8	2753400	2972300	2831100	2.85227e+06	1946
LINF_350057600-T1-p1	LINF_350057600-T1-p1	Zinc finger C-x8-C-x5-C-x3-H type (and similar) - putative	4	2875700	2784900	2893800	2.85147e+06	1947
LINF_210010100-T1-p1	LINF_210010100-T1-p1	vacuolar sorting-associated-like protein	19	2467800	2818000	3266000	2850600	1948
LINF_290006400-T1-p1	LINF_290006400-T1-p1	Putative intraflagellar transport protein B2	15	2871000	2922700	2757300	2.85033e+06	1949
LINF_300022900-T1-p1	LINF_300022900-T1-p1	queuine tRNA-ribosyltransferase - putative	12	2667300	2763200	3120400	2850300	1950
LINF_270011600-T1-p1	LINF_270011600-T1-p1	cdc2-related kinase 6 - putative	9	2677900	2995800	2876300	2850000	1951
LINF_050005300-T1-p1	LINF_050005300-T1-p1	paraflagellar rod component par4 - putative	11	2801700	2745000	3001500	2849400	1952
LINF_210010900-T1-p1	LINF_210010900-T1-p1	Tetratricopeptide repeat - putative	13	2741600	2892300	2904300	2.84607e+06	1953
LINF_310014400-T1-p1	LINF_310014400-T1-p1	ras-like small GTPases - putative	8	3065600	2737000	2734200	2845600	1954
LINF_260011300-T1-p1	LINF_260011300-T1-p1	hypothetical protein - conserved	7	2707200	2893900	2930900	2844000	1955
LINF_180015800-T1-p1	LINF_180015800-T1-p1	5-oxoprolinase - putative	13	2778000	2724000	3028100	2.84337e+06	1956
LINF_250019200-T1-p1	LINF_250019200-T1-p1	hypothetical protein - conserved	7	2824500	2641600	3061700	2842600	1957
LINF_260015400-T1-p1	LINF_260015400-T1-p1	hypothetical protein - conserved	17	2616400	2892800	3013200	2840800	1958
LINF_330035000-T1-p1	LINF_330035000-T1-p1	hypothetical protein - conserved	1	2766600	2780900	2973600	2.84037e+06	1959
LINF_290035400-T1-p1	LINF_290035400-T1-p1	Putative intraflagellar transport protein C3	18	2713900	2913100	2879100	2.83537e+06	1960
LINF_260027300-T1-p1	LINF_260027300-T1-p1	hypothetical protein	3	2922800	2693700	2889000	2.83517e+06	1961
LINF_260009300-T1-p1	LINF_260009300-T1-p1	nucleotide binding protein-like protein	8	2937500	2664700	2893900	2.83203e+06	1962
LINF_090022100-T1-p1	LINF_090022100-T1-p1	Rhodanese-like domain containing protein - putative	3	3040600	2969200	2481500	2.83043e+06	1963
LINF_360033900-T1-p1	LINF_360033900-T1-p1	folylpolyglutamate synthetase	7	3036700	2826800	2607400	2.82363e+06	1964
LINF_220016000-T1-p1	LINF_220016000-T1-p1	hypothetical protein - conserved	8	2867400	2720800	2878500	2.82223e+06	1965
LINF_350044900-T1-p1	LINF_350044900-T1-p1	Chromosome passenger complex (CPC) protein INCENP N terminal - putative	9	2680300	3082200	2698400	2820300	1966
LINF_320020500-T1-p1	LINF_320020500-T1-p1	hypothetical protein - conserved	5	2771300	2733400	2951200	2.81863e+06	1967
LINF_290014800-T1-p1	LINF_290014800-T1-p1	signal peptide peptidase - putative	1	2585700	2664900	3198700	2.81643e+06	1968
LINF_350042200-T1-p1	LINF_350042200-T1-p1	ribulose-phosphate 3-epimerase - putative	3	2782400	2624100	3034500	2.81367e+06	1969
LINF_350020100-T1-p1	LINF_350020100-T1-p1	NLI interacting factor-like phosphatase/Zinc finger C-x8-C-x5-C-x3-H type (and similar) - putative	6	2832500	2688300	2918700	2.81317e+06	1970
LINF_150019700-T1-p1	LINF_150019700-T1-p1	inositol/phosphatidylinositol phosphatase - putative	12	2831100	2785500	2821200	2812600	1971
LINF_270024300-T1-p1	LINF_270024300-T1-p1	dynein heavy chain - putative	54	2712000	2769600	2950300	2.81063e+06	1972
LINF_360075300-T1-p1	LINF_360075300-T1-p1	40S ribosomal protein S8 - putative	7	2606900	2996800	2826400	2.81003e+06	1973
LINF_020009800-T1-p1	LINF_020009800-T1-p1	voltage-dependent anion-selective channel - putative	6	2817200	2987500	2622600	2809100	1974
LINF_110009600-T1-p1	LINF_110009600-T1-p1	pumillio protein 10 - putative	20	2868500	2689500	2863900	2807300	1975
LINF_320014500-T1-p1	LINF_320014500-T1-p1	ethanolamine-phosphate cytidylyltransferase	16	2494700	2851500	3073100	2.80643e+06	1976
LINF_140013600-T1-p1	LINF_140013600-T1-p1	Ribosomal prokaryotic L21 protein - putative	5	2960500	2890600	2554300	2801800	1977
LINF_330022000-T1-p1	LINF_330022000-T1-p1	hypothetical protein - conserved	8	2917000	2794500	2684800	2.79877e+06	1978
LINF_040015500-T1-p1	LINF_040015500-T1-p1	acyltransferase-like protein - copy 1	6	2549200	3066700	2780200	2798700	1979
LINF_140015100-T1-p1	LINF_140015100-T1-p1	hypothetical protein	2	2619600	2809300	2965200	2.79803e+06	1980
LINF_360017600-T1-p1	LINF_360017600-T1-p1	hypothetical protein - conserved	7	3069600	2642400	2679400	2.79713e+06	1981
LINF_280033100-T1-p1	LINF_280033100-T1-p1	splicing factor 3B subunit 1 - putative	20	2918200	2719000	2741400	2.79287e+06	1982
LINF_120005000-T1-p1	LINF_120005000-T1-p1	translation initiation factor EIF-2b alpha subunit - putative	5	2556000	2884500	2937000	2792500	1983
LINF_220022400-T1-p1	LINF_220022400-T1-p1	hypothetical protein - conserved	16	2740400	2633900	2999400	2.79123e+06	1984
[truncated: 3,019 more rows]

## Sheet: DDA010
PROTEIN INFORMATION				PROTEIN SIGNAL INTENSITY
Accession	Protein IDs	Protein name	Razor Unique Peptides	L. infantum Promastigote_01	L. infantum Promastigote_02	L. infantum Promastigote_03	Mean Promastigote	Intensity Promastigote rank (/5282)
ncRNA.LinJ.15.590018-587628.ORF_1	ncRNA.LinJ.15.590018-587628.ORF_1	ncRNA.LinJ.15.590018-587628.ORF_1	22	61948000	64724000	65084000	6.39187e+07	394
ncRNA.LinJ.32.1385314-1386378.ORF_4	ncRNA.LinJ.32.1385314-1386378.ORF_4	ncRNA.LinJ.32.1385314-1386378.ORF_4	2	59645000	61701000	47728000	56358000	443
ncRNA.LinJ.27.729538-730207.ORF_3	ncRNA.LinJ.27.729538-730207.ORF_3	ncRNA.LinJ.27.729538-730207.ORF_3	3	43029000	43921000	39281000	42077000	589
ncRNA.LinJ.02.201034-197069.ORF_19	ncRNA.LinJ.02.201034-197069.ORF_19	ncRNA.LinJ.02.201034-197069.ORF_19	1	42726000	23534000	32400000	3.28867e+07	725
ncRNA.LinJ.22.459913-460701.ORF_2	ncRNA.LinJ.22.459913-460701.ORF_2	ncRNA.LinJ.22.459913-460701.ORF_2	2	25130000	13647000	19956000	1.95777e+07	1048
ncRNA.LinJ.35.673269-675508.ORF_1	ncRNA.LinJ.35.673269-675508.ORF_1	ncRNA.LinJ.35.673269-675508.ORF_1	4	16593000	13412000	14562000	1.48557e+07	1276
ncRNA.LinJ.36.2251943-2251121.ORF_2	ncRNA.LinJ.36.2251943-2251121.ORF_2	ncRNA.LinJ.36.2251943-2251121.ORF_2	2	14247000	12021000	14066000	1.34447e+07	1363
ncRNA.LinJ.23.55821-56760.ORF_6	ncRNA.LinJ.23.55821-56760.ORF_6	ncRNA.LinJ.23.55821-56760.ORF_6	1	12025000	11833000	15513000	1.31237e+07	1382
ncRNA.LinJ.20.239215-241929.ORF_1	ncRNA.LinJ.20.239215-241929.ORF_1	ncRNA.LinJ.20.239215-241929.ORF_1	18	9534200	10295000	8541600	9.45693e+06	1740
ncRNA.LinJ.05.422834-421082.ORF_1	ncRNA.LinJ.05.422834-421082.ORF_1	ncRNA.LinJ.05.422834-421082.ORF_1	10	7846700	6915200	7648000	7.46997e+06	2067
ncRNA.LinJ.32.189645-190544.ORF_7	ncRNA.LinJ.32.189645-190544.ORF_7	ncRNA.LinJ.32.189645-190544.ORF_7	1	309925	17197000	349455	5.95213e+06	2425
ncRNA.LinJ.19.354991-355730.ORF_2	ncRNA.LinJ.19.354991-355730.ORF_2;LINF_190014300-T1-p1;LINF_190014100-T1-p1;LINF_190013900-T1-p1;LINF_190014200-T1-p1;LINF_190014000-T1-p1;LINF_190013500-T1-p1;LINF_190013400-T1-p1;LINF_190013300-T1-p1;LINF_190013200-T1-p1;LINF_190013100-T1-p1;LINF_190013600-T1-p1;LINF_190013800-T1-p1;LINF_190013700-T1-p1	ATG8/AUT7/APG8/PAZ2 - putative	5	6045800	4583400	4843900	5157700	2664
ncRNA.LinJ.10.550354-549741.ORF_1	ncRNA.LinJ.10.550354-549741.ORF_1	ncRNA.LinJ.10.550354-549741.ORF_1	2	4044100	5383300	4764000	4.73047e+06	2827
ncRNA.LinJ.28.197115-192988.ORF_14	ncRNA.LinJ.28.197115-192988.ORF_14	ncRNA.LinJ.28.197115-192988.ORF_14	2	5402600	2753300	5389800	4.51523e+06	2899
ncRNA.LinJ.19.288698-290243.ORF_1	ncRNA.LinJ.19.288698-290243.ORF_1	ncRNA.LinJ.19.288698-290243.ORF_1	4	4711000	4408300	4086100	4401800	2944
ncRNA.LinJ.26.528346-530231.ORF_2	ncRNA.LinJ.26.528346-530231.ORF_2	ncRNA.LinJ.26.528346-530231.ORF_2	3	4640700	4673400	3852400	4.38883e+06	2948
ncRNA.LinJ.35.1360086-1358934.ORF_1	ncRNA.LinJ.35.1360086-1358934.ORF_1	ncRNA.LinJ.35.1360086-1358934.ORF_1	3	2874400	4644100	4778800	4099100	3061
ncRNA.LinJ.32.1539269-1540859.ORF_1	ncRNA.LinJ.32.1539269-1540859.ORF_1	ncRNA.LinJ.32.1539269-1540859.ORF_1	5	3561500	4102100	3576900	3.74683e+06	3188
ncRNA.LinJ.32.248736-249993.ORF_4	ncRNA.LinJ.32.248736-249993.ORF_4	ncRNA.LinJ.32.248736-249993.ORF_4	2	3520200	3029700	3395500	3.31513e+06	3382
ncRNA.LinJ.16.660443-661654.ORF_2	ncRNA.LinJ.16.660443-661654.ORF_2	ncRNA.LinJ.16.660443-661654.ORF_2	5	3407700	2755500	3445400	3.20287e+06	3452
ncRNA.LinJ.26.996213-997182.ORF_3	ncRNA.LinJ.26.996213-997182.ORF_3	ncRNA.LinJ.26.996213-997182.ORF_3	1	4818300	429632	3978000	3.07531e+06	3519
ncRNA.LinJ.27.726830-727746.ORF_2	ncRNA.LinJ.27.726830-727746.ORF_2	ncRNA.LinJ.27.726830-727746.ORF_2	2	2539200	3606900	1763400	2636500	3799
ncRNA.LinJ.36.2707985-2706764.ORF_2	ncRNA.LinJ.36.2707985-2706764.ORF_2	ncRNA.LinJ.36.2707985-2706764.ORF_2	2	2323800	2748700	1818400	2.29697e+06	4028
ncRNA.LinJ.33.351963-353649.ORF_1	ncRNA.LinJ.33.351963-353649.ORF_1	ncRNA.LinJ.33.351963-353649.ORF_1	2	2234800	2808800	1685600	2.24307e+06	4058
ncRNA.LinJ.15.425133-423348.ORF_1	ncRNA.LinJ.15.425133-423348.ORF_1	ncRNA.LinJ.15.425133-423348.ORF_1	4	2312900	2399800	1980700	2.23113e+06	4068
ncRNA.LinJ.34.398799-400494.ORF_11	ncRNA.LinJ.34.398799-400494.ORF_11	ncRNA.LinJ.34.398799-400494.ORF_11	1	2625200	1484700	2398800	2.16957e+06	4108
ncRNA.LinJ.25.110081-108690.ORF_1	ncRNA.LinJ.25.110081-108690.ORF_1	ncRNA.LinJ.25.110081-108690.ORF_1	3	2311700	2208100	1894900	2.13823e+06	4131
ncRNA.LinJ.35.1777657-1779295.ORF_1	ncRNA.LinJ.35.1777657-1779295.ORF_1	ncRNA.LinJ.35.1777657-1779295.ORF_1	5	1843500	2217400	2039800	2.03357e+06	4205
ncRNA.LinJ.28.786456-785673.ORF_2	ncRNA.LinJ.28.786456-785673.ORF_2	ncRNA.LinJ.28.786456-785673.ORF_2	1	309925	4368500	349455	1.67596e+06	4456
ncRNA.LinJ.35.1108480-1106329.ORF_1	ncRNA.LinJ.35.1108480-1106329.ORF_1	ncRNA.LinJ.35.1108480-1106329.ORF_1	2	2014000	1441600	1237100	1.56423e+06	4538
ncRNA.LinJ.18.178433-175461.ORF_1	ncRNA.LinJ.18.178433-175461.ORF_1	ncRNA.LinJ.18.178433-175461.ORF_1	1	1354000	2186300	877220	1.47251e+06	4600
ncRNA.LinJ.21.277415-279535.ORF_11	ncRNA.LinJ.21.277415-279535.ORF_11	ncRNA.LinJ.21.277415-279535.ORF_11	1	1274100	941180	1093500	1.10293e+06	4839
ncRNA.LinJ.34.310524-310085.ORF_1	ncRNA.LinJ.34.310524-310085.ORF_1	ncRNA.LinJ.34.310524-310085.ORF_1	1	309925	1811800	1090100	1.07061e+06	4855
ncRNA.LinJ.25.25225-24849.ORF_2	ncRNA.LinJ.25.25225-24849.ORF_2	ncRNA.LinJ.25.25225-24849.ORF_2	1	1126900	785040	826860	912933	4931
ncRNA.LinJ.36.1432207-1430531.ORF_1	ncRNA.LinJ.36.1432207-1430531.ORF_1	ncRNA.LinJ.36.1432207-1430531.ORF_1	1	1001700	1278500	349455	876552	4963
ncRNA.LinJ.35.400425-402682.ORF_21	ncRNA.LinJ.35.400425-402682.ORF_21	ncRNA.LinJ.35.400425-402682.ORF_21	1	309925	1003400	349455	554260	5102
ncRNA.LinJ.20.186974-187461.ORF_2	ncRNA.LinJ.20.186974-187461.ORF_2	ncRNA.LinJ.20.186974-187461.ORF_2	1	529100	377580	540170	482283	5130
ncRNA.LinJ.32.500800-501368.ORF_1	ncRNA.LinJ.32.500800-501368.ORF_1	ncRNA.LinJ.32.500800-501368.ORF_1	1	488810	429632	372260	430234	5148
ncRNA.LinJ.23.127767-129970.ORF_1	ncRNA.LinJ.23.127767-129970.ORF_1	ncRNA.LinJ.23.127767-129970.ORF_1	1	309925	456370	399910	388735	5166
ncRNA.LinJ.36.2386168-2385316.ORF_13	ncRNA.LinJ.36.2386168-2385316.ORF_13	ncRNA.LinJ.36.2386168-2385316.ORF_13	1	309925	429632	349455	363004	5192
ncRNA.LinJ.34.796975-795855.ORF_1	ncRNA.LinJ.34.796975-795855.ORF_1;ncRNA.LinJ.34.767208-766088.ORF_1;ncRNA.LinJ.34.778367-776054.ORF_3;ncRNA.LinJ.34.800342-799188.ORF_1;ncRNA.LinJ.34.770573-769419.ORF_1	ncRNA.LinJ.34.796975-795855.ORF_1;ncRNA.LinJ.34.767208-766088.ORF_1;ncRNA.LinJ.34.778367-776054.ORF_3;ncRNA.LinJ.34.800342-799188.ORF_1;ncRNA.LinJ.34.770573-769419.ORF_1	1	309925	429632	349455	363004	5188
ncRNA.LinJ.31.1479629-1478470.ORF_5	ncRNA.LinJ.31.1479629-1478470.ORF_5	ncRNA.LinJ.31.1479629-1478470.ORF_5	1	309925	429632	349455	363004	5198
ncRNA.LinJ.29.529810-530673.ORF_4	ncRNA.LinJ.29.529810-530673.ORF_4	ncRNA.LinJ.29.529810-530673.ORF_4	1	309925	429632	349455	363004	5199
ncRNA.LinJ.21.250221-250878.ORF_3	ncRNA.LinJ.21.250221-250878.ORF_3	ncRNA.LinJ.21.250221-250878.ORF_3	1	309925	429632	349455	363004	5200
ncRNA.LinJ.18.178433-175461.ORF_24	ncRNA.LinJ.18.178433-175461.ORF_24	ncRNA.LinJ.18.178433-175461.ORF_24	1	309925	429632	349455	363004	5201
ncRNA.LinJ.35.1965872-1966370.ORF_2	ncRNA.LinJ.35.1965872-1966370.ORF_2	ncRNA.LinJ.35.1965872-1966370.ORF_2	2	309925	429632	313740	351099	5239
ncRNA.LinJ.32.1214849-1215398.ORF_1	ncRNA.LinJ.32.1214849-1215398.ORF_1	ncRNA.LinJ.32.1214849-1215398.ORF_1	1	87825	136410	349455	191230	5276
LINF_170007200-T1-p1	LINF_170007200-T1-p1;LINF_170007100-T1-p1;LINF_170007000-T1-p1;LINF_170006900-T1-p1;LINF_170006800-T1-p1;LINF_170006700-T1-p1;LINF_170006600-T1-p1;LINF_170006500-T1-p1;LINF_170006400-T1-p1;LINF_170006300-T1-p1;LINF_170006200-T1-p1;LINF_170006100-T1-p1;LINF_170006000-T1-p1;LINF_170005900-T1-p1	elongation factor 1-alpha	35	5512600000	5957000000	5503300000	5.65763e+09	1
LINF_330015200-T1-p1	LINF_330015200-T1-p1;LINF_330015100-T1-p1;LINF_330015000-T1-p1	beta tubulin	38	5455800000	5385200000	5327500000	5389500000	2
LINF_130008800-T1-p1	LINF_130008800-T1-p1;LINF_130008700-T1-p1;LINF_130008600-T1-p1;LINF_130008500-T1-p1;LINF_130008400-T1-p1;LINF_130008300-T1-p1;LINF_130008200-T1-p1;LINF_130008100-T1-p1;LINF_130008000-T1-p1;LINF_130007900-T1-p1;LINF_130007800-T1-p1;LINF_130007700-T1-p1	alpha tubulin	36	3805500000	4006100000	4212800000	4.00813e+09	3
LINF_250014900-T1-p1	LINF_250014900-T1-p1	cyclophilin type peptidyl-prolyl cis-trans isomerase	12	2750700000	2550600000	2633200000	2.64483e+09	4
LINF_360040400-T1-p1	LINF_360040400-T1-p1	14-3-3 protein 1 - putative	15	1835300000	1988100000	1996400000	1.93993e+09	5
LINF_190005300-T1-p1	LINF_190005300-T1-p1;LINF_190005200-T1-p1;LINF_090020900-T1-p1	histone H2B	7	1920400000	2065500000	1805000000	1930300000	6
LINF_320036800-T1-p1	LINF_320036800-T1-p1;LINF_320036700-T1-p1	nucleoside diphosphate kinase b	11	1872400000	1683700000	1706700000	1.75427e+09	7
LINF_330015500-T1-p1	LINF_330015500-T1-p1;LINF_330015400-T1-p1;LINF_330015300-T1-p1	beta tubulin	1	1765100000	1460400000	1986800000	1.73743e+09	8
LINF_100011100-T1-p1	LINF_100011100-T1-p1;LINF_100011000-T1-p1;LINF_100010900-T1-p1;LINF_100010800-T1-p1;LINF_100010700-T1-p1;LINF_100010600-T1-p1;LINF_100010300-T1-p1;LINF_100010200-T1-p1;LINF_100010400-T1-p1;LINF_100010500-T1-p1	GP63 - leishmanolysin	23	1678300000	1477200000	1705500000	1.62033e+09	9
LINF_260011400-T1-p1	LINF_260011400-T1-p1;LINF_260011200-T1-p1	10 kDa heat shock protein - putative	6	1325100000	1435900000	1811500000	1.52417e+09	10
LINF_150018600-T1-p1	LINF_150018600-T1-p1;LINF_150018800-T1-p1	tryparedoxin peroxidase	19	1379700000	1420800000	1382800000	1.39443e+09	11
LINF_230014600-T1-p1	LINF_230014600-T1-p1	3-ketoacyl-CoA thiolase - putative	24	1277200000	1364700000	1322900000	1321600000	12
LINF_160011400-T1-p1	LINF_160011400-T1-p1;LINF_160011300-T1-p1;LINF_160011000-T1-p1;LINF_160010900-T1-p1	Core histone H2A/H2B/H3/H4/Histone-like transcription factor (CBF/NF-Y) and archaeal histone - putative	6	860130000	1964400000	1056600000	1293710000	13
LINF_280039700-T1-p1	LINF_280039700-T1-p1	hypothetical protein - conserved	5	1213900000	1172100000	1346200000	1.24407e+09	14
LINF_300035200-T1-p1	LINF_300035200-T1-p1;LINF_300035100-T1-p1;LINF_300035000-T1-p1	glyceraldehyde 3-phosphate dehydrogenase - glycosomal	25	1240800000	1176800000	1283000000	1.23353e+09	15
LINF_210016900-T1-p1	LINF_210016900-T1-p1;LINF_210016800-T1-p1;LINF_210016700-T1-p1	histone H2A - putative	3	1136800000	1212600000	1143600000	1.16433e+09	16
LINF_280036000-T1-p1	LINF_280036000-T1-p1;LINF_280035900-T1-p1;LINF_280035500-T1-p1;LINF_280035400-T1-p1;LINF_280035300-T1-p1;LINF_280035200-T1-p1;LINF_280035100-T1-p1;LINF_280035000-T1-p1;LINF_280035800-T1-p1;LINF_280035700-T1-p1;LINF_280035600-T1-p1	hsp70	56	1216300000	1157800000	1113700000	1162600000	17
LINF_330010000-T1-p1	LINF_330010000-T1-p1;LINF_330009900-T1-p1;LINF_330009800-T1-p1;LINF_330009500-T1-p1;LINF_330009400-T1-p1;LINF_330009300-T1-p1;LINF_330009200-T1-p1;LINF_330009100-T1-p1;LINF_330009000-T1-p1;LINF_330009600-T1-p1;LINF_330009700-T1-p1	heat shock protein 83-17	56	1074900000	1034400000	1069100000	1.05947e+09	18
LINF_320024100-T1-p1	LINF_320024100-T1-p1	iron superoxide dismutase - putative	13	948260000	1099300000	869270000	9.72277e+08	19
LINF_130010600-T1-p1	LINF_130010600-T1-p1	40S ribosomal protein S12 - putative	11	958840000	919090000	1035400000	971110000	20
LINF_050008800-T1-p1	LINF_050008800-T1-p1	microtubule-associated protein - putative	34	1086900000	664620000	1121800000	9.57773e+08	21
LINF_210028500-T1-p1	LINF_210028500-T1-p1	beta tubulin	1	838480000	993000000	834110000	888530000	22
LINF_360015200-T1-p1	LINF_360015200-T1-p1;LINF_360015100-T1-p1	40S ribosomal protein S18 - putative	16	803900000	772880000	651030000	7.42603e+08	23
LINF_350027500-T1-p1	LINF_350027500-T1-p1;LINF_350027400-T1-p1;LINF_350027300-T1-p1	kinetoplastid membrane protein-11	11	761720000	564350000	704900000	676990000	24
LINF_360048000-T1-p1	LINF_360048000-T1-p1	S-adenosylhomocysteine hydrolase	37	653860000	667760000	691570000	6.71063e+08	25
LINF_300030100-T1-p1	LINF_300030100-T1-p1	heat shock 70-related protein 1 - mitochondrial precursor - putative	50	716490000	572760000	686550000	658600000	26
LINF_050010200-T1-p1	LINF_050010200-T1-p1;LINF_050010100-T1-p1;LINF_050010000-T1-p1	ATP synthase F1 - alpha subunit - putative	27	657840000	634090000	646160000	646030000	27
LINF_140018000-T1-p1	LINF_140018000-T1-p1	enolase	34	593650000	565440000	622570000	5.93887e+08	28
LINF_010012900-T1-p1	LINF_010012900-T1-p1;LINF_010012800-T1-p1	eukaryotic initiation factor 4a - putative	26	542500000	631900000	603720000	5.92707e+08	29
LINF_240027300-T1-p1	LINF_240027300-T1-p1	3-hydroxy-3-methylglutaryl-CoA synthase - putative	43	583800000	551160000	533680000	5.56213e+08	30
LINF_060005000-T1-p1	LINF_060005000-T1-p1	histone H4	10	584460000	461230000	613980000	5.53223e+08	31
LINF_360046400-T1-p1	LINF_360046400-T1-p1;LINF_180011200-T1-p1	40S ribosomal protein S27-1 - putative	5	496340000	549330000	594190000	546620000	32
LINF_190006900-T1-p1	LINF_190006900-T1-p1;LINF_190006800-T1-p1	ADP- ATP carrier protein 1 - mitochondrial precursor - putative	19	496940000	548220000	593940000	5.46367e+08	33
LINF_210007900-T1-p1	LINF_210007900-T1-p1;LINF_210007800-T1-p1	hexokinase - putative	38	531890000	512660000	546600000	5.30383e+08	34
LINF_360007100-T1-p1	LINF_360007100-T1-p1;LINF_360007000-T1-p1;LINF_360006900-T1-p1;LINF_360006800-T1-p1	elongation factor 2	63	482100000	529930000	497670000	5.03233e+08	35
LINF_070010600-T1-p1	LINF_070010600-T1-p1;LINF_070010500-T1-p1	60S ribosomal protein L7a - putative	15	462040000	589760000	435890000	4.95897e+08	36
LINF_320009100-T1-p1	LINF_320009100-T1-p1	ATP-dependent RNA helicase - putative	34	476720000	475270000	535140000	495710000	37
LINF_310029700-T1-p1	LINF_310029700-T1-p1	prostaglandin f2-alpha synthase/D-arabinose dehydrogenase	18	516500000	498980000	466690000	4.94057e+08	38
LINF_270025000-T1-p1	LINF_270025000-T1-p1;LINF_270024900-T1-p1	glycosomal phosphoenolpyruvate carboxykinase - putative	40	504020000	488200000	484890000	492370000	39
LINF_170012700-T1-p1	LINF_170012700-T1-p1;LINF_170012500-T1-p1	Acyl CoA binding protein - putative	8	557350000	405500000	483260000	4.82037e+08	40
LINF_130017300-T1-p1	LINF_130017300-T1-p1;LINF_130017200-T1-p1	40S ribosomal protein S4 - putative	14	471040000	418100000	529130000	4.72757e+08	41
LINF_300039100-T1-p1	LINF_300039100-T1-p1;LINF_210018100-T1-p1	60S ribosomal protein L9 - putative	11	456090000	432490000	488750000	459110000	42
LINF_260017400-T1-p1	LINF_260017400-T1-p1	heat shock 70-related protein 1 - mitochondrial precursor - putative	35	459630000	390150000	480180000	443320000	43
LINF_340014200-T1-p1	LINF_340014200-T1-p1;LINF_340014000-T1-p1	elongation factor 1-beta	8	491620000	393870000	423820000	4.36437e+08	44
LINF_350005400-T1-p1	LINF_350005400-T1-p1;LINF_350005300-T1-p1;LINF_350005200-T1-p1	pyruvate kinase	32	448590000	385940000	459200000	4.31243e+08	45
LINF_360018400-T1-p1	LINF_360018400-T1-p1	fructose-1 -6-bisphosphate aldolase	26	410800000	403800000	423290000	412630000	46
LINF_350037700-T1-p1	LINF_350037700-T1-p1	cystathione gamma lyase - putative	14	438830000	428550000	370490000	4.12623e+08	47
LINF_210024100-T1-p1	LINF_210024100-T1-p1;LINF_200021000-T1-p1	40S ribosomal protein S11 - putative	9	396330000	391880000	395270000	3.94493e+08	48
LINF_250018000-T1-p1	LINF_250018000-T1-p1;LINF_250017900-T1-p1	ATP synthase subunit beta - mitochondrial - putative	27	379980000	401440000	391920000	3.91113e+08	49
LINF_150019600-T1-p1	LINF_150019600-T1-p1;LINF_150019500-T1-p1	60S acidic ribosomal protein P2	7	389090000	279720000	502950000	3.90587e+08	50
LINF_360046500-T1-p1	LINF_360046500-T1-p1;LINF_180011500-T1-p1	60S ribosomal protein L10a - putative	22	412710000	373820000	381360000	3.89297e+08	51
LINF_250010200-T1-p1	LINF_250010200-T1-p1	RNA-binding protein - putative - UPB1	6	365180000	350060000	435920000	383720000	52
LINF_310028300-T1-p1	LINF_310028300-T1-p1;LINF_310026800-T1-p1;LINF_090015200-T1-p1;LINF_360043900-T1-p1	ubiquitin-fusion protein	5	367990000	317190000	448740000	3.77973e+08	53
LINF_290017500-T1-p1	LINF_290017500-T1-p1	tryparedoxin 1 - putative	12	375980000	382030000	373330000	3.77113e+08	54
LINF_030009000-T1-p1	LINF_030009000-T1-p1;LINF_030009100-T1-p1	60s Acidic ribosomal protein - putative	6	399300000	288300000	425750000	3.71117e+08	55
LINF_360046600-T1-p1	LINF_360046600-T1-p1	transcription factor btf3 - putative	9	342920000	349010000	388100000	360010000	56
LINF_180010100-T1-p1	LINF_180010100-T1-p1	aconitase - putative	42	350450000	349480000	376490000	3.58807e+08	57
LINF_290032400-T1-p1	LINF_290032400-T1-p1;LINF_290032300-T1-p1	60S ribosomal protein L13 - putative	14	382960000	357460000	320980000	353800000	58
LINF_350023900-T1-p1	LINF_350023900-T1-p1;LINF_350023800-T1-p1;LINF_350023700-T1-p1	60S ribosomal protein L5 - putative	13	360880000	321230000	374350000	3.52153e+08	59
LINF_210018300-T1-p1	LINF_210018300-T1-p1;LINF_210018200-T1-p1	40S ribosomal protein S23 - putative	5	382070000	329640000	331100000	3.47603e+08	60
LINF_350050500-T1-p1	LINF_350050500-T1-p1	CS domain containing protein - putative	9	338830000	384470000	311600000	3.44967e+08	61
LINF_250017300-T1-p1	LINF_250017300-T1-p1	aldehyde dehydrogenase - mitochondrial precursor	29	337590000	335750000	356950000	343430000	62
LINF_290016800-T1-p1	LINF_290016800-T1-p1;LINF_290016700-T1-p1;LINF_290016600-T1-p1	ribosomal protein L1a - putative	24	361910000	318410000	333600000	3.37973e+08	63
LINF_360036700-T1-p1	LINF_360036700-T1-p1;LINF_360036600-T1-p1	40S ribosomal protein S24e	7	347640000	349330000	314340000	3.37103e+08	64
LINF_360037500-T1-p1	LINF_360037500-T1-p1	succinyl-CoA ligase [GDP-forming] beta-chain - putative	21	338520000	333140000	338050000	336570000	65
LINF_280015900-T1-p1	LINF_280015900-T1-p1;LINF_280015700-T1-p1	ribosomal protein S20 - putative	8	348370000	315610000	333240000	3.32407e+08	66
LINF_350025100-T1-p1	LINF_350025100-T1-p1;LINF_210027600-T1-p1	40S ribosomal protein S6 - putative	16	330530000	340100000	318620000	329750000	67
LINF_360060700-T1-p1	LINF_360060700-T1-p1;LINF_360059600-T1-p1	40S ribosomal protein SA - putative	16	294750000	355000000	308400000	3.19383e+08	68
LINF_360020500-T1-p1	LINF_360020500-T1-p1	translation elongation factor 1-beta - putative	20	348640000	256440000	352500000	3.19193e+08	69
LINF_040017600-T1-p1	LINF_040017600-T1-p1	actin	28	325420000	288100000	323170000	312230000	70
LINF_300043100-T1-p1	LINF_300043100-T1-p1;LINF_300043000-T1-p1	60S acidic ribosomal protein P2 - putative	11	341990000	339120000	236900000	3.06003e+08	71
LINF_130005800-T1-p1	LINF_130005800-T1-p1	carboxypeptidase - putative	33	300850000	318190000	297390000	3.05477e+08	72
LINF_280034800-T1-p1	LINF_280034800-T1-p1;LINF_280034700-T1-p1	receptor for activated C kinase 1	22	289570000	313590000	302040000	3.01733e+08	73
LINF_090015600-T1-p1	LINF_090015600-T1-p1;LINF_090015500-T1-p1;LINF_090015400-T1-p1	calmodulin - putative	14	330040000	194560000	373960000	299520000	74
LINF_330014100-T1-p1	LINF_330014100-T1-p1;LINF_150018200-T1-p1	60S ribosomal protein L6 - putative	13	308270000	266550000	309140000	2.94653e+08	75
LINF_290036400-T1-p1	LINF_290036400-T1-p1	40S ribosomal protein S19-like protein	9	283120000	263290000	333040000	293150000	76
LINF_340031800-T1-p1	LINF_340031800-T1-p1	Alba - putative	17	350620000	220490000	307190000	2.92767e+08	77
LINF_160019000-T1-p1	LINF_160019000-T1-p1;LINF_160018900-T1-p1	cytochrome c - putative	5	354660000	240360000	274950000	289990000	78
LINF_230007100-T1-p1	LINF_230007100-T1-p1	endoribonuclease L-PSP (pb5) - putative	10	283080000	325010000	244840000	284310000	79
LINF_330016500-T1-p1	LINF_330016500-T1-p1;LINF_150017600-T1-p1	40S ribosomal protein S3 - putative	13	274230000	272550000	304260000	283680000	80
LINF_350042400-T1-p1	LINF_350042400-T1-p1	Gim5A protein - putative	18	247360000	291700000	301130000	2.80063e+08	81
LINF_110017500-T1-p1	LINF_110017500-T1-p1;LINF_110017300-T1-p1	60S ribosomal protein L28 - putative	7	259040000	310720000	266160000	278640000	82
LINF_180019100-T1-p1	LINF_180019100-T1-p1	heat shock protein 110 - putative	54	275040000	267350000	285590000	2.75993e+08	83
LINF_290032900-T1-p1	LINF_290032900-T1-p1	ATP-dependent phosphofructokinase	35	258930000	283630000	284970000	2.75843e+08	84
LINF_260006700-T1-p1	LINF_260006700-T1-p1;LINF_260006600-T1-p1	60S ribosomal protein L7 - putative	18	280590000	256520000	270230000	2.69113e+08	85
LINF_320013000-T1-p1	LINF_320013000-T1-p1	RNA binding protein - putative	16	290830000	243130000	266180000	2.66713e+08	86
LINF_350043200-T1-p1	LINF_350043200-T1-p1;LINF_350043000-T1-p1	60S ribosomal protein L27A/L29 - putative	7	228040000	291270000	279160000	2.66157e+08	87
LINF_360068400-T1-p1	LINF_360068400-T1-p1	flagellum targeting protein kharon1 - putative	21	292580000	197460000	302610000	2.64217e+08	88
LINF_340035700-T1-p1	LINF_340035700-T1-p1;LINF_340035600-T1-p1;LINF_320038800-T1-p1	ribosomal protein L3 - putative	22	244120000	247860000	294270000	2.62083e+08	89
LINF_340006400-T1-p1	LINF_340006400-T1-p1	malate dehydrogenase	21	257200000	283780000	241680000	2.60887e+08	90
LINF_220020700-T1-p1	LINF_220020700-T1-p1	i/6 autoantigen-like protein	10	276120000	217740000	287300000	2.60387e+08	91
LINF_230026500-T1-p1	LINF_230026500-T1-p1	Nucleoside 2-deoxyribosyltransferase - putative	7	253320000	256870000	270630000	2.60273e+08	92
LINF_040014500-T1-p1	LINF_040014500-T1-p1;LINF_040012600-T1-p1	60S ribosomal protein L10 - putative	16	256990000	278970000	242510000	259490000	93
LINF_220005300-T1-p1	LINF_220005300-T1-p1;LINF_040009700-T1-p1	60S ribosomal protein L11 (L5 - L16)	9	186410000	291280000	281030000	2.52907e+08	94
LINF_290013400-T1-p1	LINF_290013400-T1-p1	CPC cysteine peptidase - Clan CA - family C1 - Cathepsin B-like	12	240980000	220180000	295570000	2.52243e+08	95
LINF_270010000-T1-p1	LINF_270010000-T1-p1	calpain-like cysteine peptidase - putative	28	259370000	261410000	234350000	251710000	96
LINF_340009500-T1-p1	LINF_340009500-T1-p1;LINF_250018100-T1-p1	ribosomal protein S25	7	253850000	212120000	276800000	247590000	97
LINF_250024400-T1-p1	LINF_250024400-T1-p1	enoyl-CoA reductase - putative	15	238450000	228080000	259490000	2.42007e+08	98
LINF_360027100-T1-p1	LINF_360027100-T1-p1	chaperonin HSP60 - mitochondrial precursor	49	254470000	210930000	249000000	2.38133e+08	99
LINF_220021800-T1-p1	LINF_220021800-T1-p1;LINF_220021400-T1-p1	60S ribosomal protein L14 - putative	3	226040000	237880000	236250000	233390000	100
LINF_160020800-T1-p1	LINF_160020800-T1-p1;LINF_160020700-T1-p1	kinesin - putative	14	237880000	208100000	253640000	2.33207e+08	101
LINF_280017800-T1-p1	LINF_280017800-T1-p1	heat shock 70-related protein 1 - mitochondrial precursor - putative	44	247790000	208900000	239780000	2.32157e+08	102
LINF_320037600-T1-p1	LINF_320037600-T1-p1	leucine-rich repeat protein - putative	38	217730000	236300000	240590000	231540000	103
LINF_260024900-T1-p1	LINF_260024900-T1-p1	hypothetical protein - conserved	52	227060000	203940000	249580000	226860000	104
LINF_360027200-T1-p1	LINF_360027200-T1-p1	chaperonin HSP60 - mitochondrial precursor	26	238770000	205510000	230730000	2.25003e+08	105
LINF_350009300-T1-p1	LINF_350009300-T1-p1;LINF_350009200-T1-p1	40S ribosomal protein S3A - putative	18	222900000	208850000	240570000	2.24107e+08	106
LINF_060011400-T1-p1	LINF_060011400-T1-p1;LINF_060011300-T1-p1	60S ribosomal protein L23a - putative	6	229300000	207370000	234410000	2.23693e+08	107
LINF_300041000-T1-p1	LINF_300041000-T1-p1;LINF_300040800-T1-p1	S-adenosylmethionine synthetase	26	226980000	216230000	226640000	2.23283e+08	108
LINF_150018300-T1-p1	LINF_150018300-T1-p1	glutamate dehydrogenase	69	218800000	199940000	239760000	219500000	109
LINF_340022400-T1-p1	LINF_340022400-T1-p1;LINF_340022500-T1-p1	p25-alpha - putative	10	221230000	204290000	232610000	2.19377e+08	110
LINF_350007500-T1-p1	LINF_350007500-T1-p1	60S ribosomal protein L30	8	221730000	174070000	261330000	2.19043e+08	111
LINF_360078300-T1-p1	LINF_360078300-T1-p1	2 -3-bisphosphoglycerate-independent phosphoglycerate mutase	27	219620000	204510000	224480000	2.16203e+08	112
LINF_240013700-T1-p1	LINF_240013700-T1-p1	triosephosphate isomerase	15	219550000	209960000	211070000	2.13527e+08	113
LINF_050013500-T1-p1	LINF_050013500-T1-p1	methylthioadenosine phosphorylase - putative	14	209340000	218220000	212650000	2.13403e+08	114
LINF_060009400-T1-p1	LINF_060009400-T1-p1;LINF_060009600-T1-p1	Ribosomal protein L19e - putative	9	215160000	198710000	213720000	2.09197e+08	115
LINF_200018300-T1-p1	LINF_200018300-T1-p1	small myristoylated protein-1	6	205300000	228400000	193700000	2.09133e+08	116
LINF_300041800-T1-p1	LINF_300041800-T1-p1	ATP synthase - epsilon chain - putative	7	264520000	142230000	220640000	209130000	117
LINF_350018700-T1-p1	LINF_350018700-T1-p1	mitochondrial processing peptidase - beta subunit - putative	30	205870000	197110000	223210000	208730000	118
LINF_280015200-T1-p1	LINF_280015200-T1-p1	40S ribosomal protein S14	14	227030000	168890000	228110000	208010000	119
LINF_350054100-T1-p1	LINF_350054100-T1-p1	proteasome alpha 1 subunit - putative	14	211720000	226480000	185190000	2.07797e+08	120
LINF_130009400-T1-p1	LINF_130009400-T1-p1	Alba - putative	12	195970000	186040000	239060000	2.07023e+08	121
LINF_360018300-T1-p1	LINF_360018300-T1-p1;LINF_070012400-T1-p1	40S ribosomal protein S9 - putative	9	194100000	243370000	183420000	2.06963e+08	122
LINF_250013100-T1-p1	LINF_250013100-T1-p1;LINF_250013000-T1-p1;LINF_250012900-T1-p1	eukaryotic initiation factor 5a - putative	9	234490000	174940000	210290000	2.06573e+08	123
LINF_280031300-T1-p1	LINF_280031300-T1-p1	2-oxoglutarate dehydrogenase - E2 component - dihydrolipoamide succinyltransferase - putative	23	201820000	220170000	194710000	2.05567e+08	124
LINF_050014800-T1-p1	LINF_050014800-T1-p1	metallo-peptidase - Clan M- - Family M49	43	204600000	182210000	221590000	202800000	125
LINF_190011900-T1-p1	LINF_190011900-T1-p1	kinesin - putative	9	253920000	153250000	195910000	2.01027e+08	126
LINF_340044000-T1-p1	LINF_340044000-T1-p1	60S ribosomal protein L21 - putative	10	213660000	176030000	210030000	1.99907e+08	127
LINF_360042500-T1-p1	LINF_360042500-T1-p1	ribosomal protein L29 - putative	4	178710000	230990000	187920000	1.99207e+08	128
LINF_270025600-T1-p1	LINF_270025600-T1-p1	trypanothione synthetase - putative	38	195420000	183410000	213090000	1.97307e+08	129
LINF_360026300-T1-p1	LINF_360026300-T1-p1	phosphomannomutase - putative	20	177170000	231550000	176940000	195220000	130
LINF_230005400-T1-p1	LINF_230005400-T1-p1	peroxidoxin	16	185330000	202070000	197470000	1.94957e+08	131
LINF_300009700-T1-p1	LINF_300009700-T1-p1	aspartyl-tRNA synthetase - putative	36	197180000	195660000	188850000	1.93897e+08	132
LINF_220010100-T1-p1	LINF_220010100-T1-p1;LINF_220009800-T1-p1	40S ribosomal protein S15 - putative	8	171750000	163310000	244610000	1.93223e+08	133
LINF_340033900-T1-p1	LINF_340033900-T1-p1	40S ribosomal protein S19 protein - putative	1	187620000	180970000	209850000	1.92813e+08	134
LINF_320015700-T1-p1	LINF_320015700-T1-p1	chaperonin containing t-complex protein - putative	30	191300000	185810000	198860000	191990000	135
LINF_320040600-T1-p1	LINF_320040600-T1-p1	dihydrolipoamide dehydrogenase - putative	31	178470000	174940000	214940000	189450000	136
LINF_350044000-T1-p1	LINF_350044000-T1-p1	T-complex protein 1 - eta subunit - putative	36	191000000	177730000	191460000	186730000	137
LINF_050008500-T1-p1	LINF_050008500-T1-p1	trypanothione reductase	25	187630000	182400000	188410000	1.86147e+08	138
LINF_010009300-T1-p1	LINF_010009300-T1-p1;LINF_010009200-T1-p1	ribosomal protein S7 - putative	18	189680000	186300000	181540000	185840000	139
LINF_260033000-T1-p1	LINF_260033000-T1-p1	glutamate 5-kinase - putative	7	168290000	194750000	193200000	1.85413e+08	140
LINF_360025800-T1-p1	LINF_360025800-T1-p1;LINF_210028000-T1-p1	60S ribosomal protein L37a	2	204150000	171940000	176220000	1.84103e+08	141
LINF_080007900-T1-p1	LINF_080007900-T1-p1	iron superoxide dismutase	15	185310000	163610000	199670000	1.82863e+08	142
LINF_270019000-T1-p1	LINF_270019000-T1-p1	T-complex protein 1 - beta subunit - putative	30	183200000	169970000	195050000	182740000	143
LINF_270013800-T1-p1	LINF_270013800-T1-p1	ras-related protein RAB1A - putative	10	182620000	192700000	172870000	182730000	144
LINF_350024100-T1-p1	LINF_350024100-T1-p1;LINF_210013000-T1-p1	60S ribosomal protein L36 - putative	5	175970000	181390000	180070000	1.79143e+08	145
LINF_240027000-T1-p1	LINF_240027000-T1-p1;LINF_240026900-T1-p1	40S ribosomal protein S8 - putative	12	173650000	151420000	212030000	1.79033e+08	146
LINF_110015700-T1-p1	LINF_110015700-T1-p1;LINF_110015600-T1-p1	40S ribosomal protein S5	9	172850000	177990000	179420000	1.76753e+08	147
LINF_230009000-T1-p1	LINF_230009000-T1-p1	NADP-dependent alcohol dehydrogenase - putative	20	169710000	157180000	190530000	1.72473e+08	148
LINF_240020600-T1-p1	LINF_240020600-T1-p1;LINF_240020500-T1-p1	translationally controlled tumor protein (TCTP) - putative	15	191530000	164530000	160890000	1.72317e+08	149
LINF_350019500-T1-p1	LINF_350019500-T1-p1;LINF_350019400-T1-p1;LINF_350019300-T1-p1;LINF_350019200-T1-p1;LINF_320046200-T1-p1	60S ribosomal protein L2 - putative	9	180950000	131970000	202140000	1.71687e+08	150
LINF_290025400-T1-p1	LINF_290025400-T1-p1;LINF_110017900-T1-p1	40S ribosomal protein S15A - putative	9	171640000	162640000	178140000	1.70807e+08	151
LINF_360046300-T1-p1	LINF_360046300-T1-p1;LINF_180019400-T1-p1	60S ribosomal protein L34 - putative	6	186950000	125480000	199230000	1.70553e+08	152
LINF_290024100-T1-p1	LINF_290024100-T1-p1;LINF_290024000-T1-p1;LINF_290023900-T1-p1	histone H2A - putative	1	185880000	160480000	162080000	169480000	153
LINF_330041600-T1-p1	LINF_330041600-T1-p1;LINF_190008800-T1-p1	40S ribosomal protein S13 - putative	7	178820000	170960000	156750000	1.68843e+08	154
LINF_260022200-T1-p1	LINF_260022200-T1-p1	cytochrome c oxidase subunit V - putative	12	195260000	154270000	156290000	1.68607e+08	155
LINF_360068300-T1-p1	LINF_360068300-T1-p1	kinetoplast-associated protein - putative	6	201360000	189110000	114810000	1.68427e+08	156
LINF_150019000-T1-p1	LINF_150019000-T1-p1	tryparedoxin peroxidase	2	160650000	172430000	166750000	166610000	157
LINF_260013800-T1-p1	LINF_260013800-T1-p1;LINF_260013700-T1-p1	40S ribosomal protein S16 - putative	8	150860000	181780000	162500000	1.65047e+08	158
LINF_030006800-T1-p1	LINF_030006800-T1-p1	delta-1-pyrroline-5-carboxylate dehydrogenase - putative	28	161350000	155700000	173970000	1.63673e+08	159
LINF_020009800-T1-p1	LINF_020009800-T1-p1	voltage-dependent anion-selective channel - putative	14	158070000	161570000	158810000	1.59483e+08	160
LINF_360047300-T1-p1	LINF_360047300-T1-p1	glycyl tRNA synthetase - putative	34	157020000	163500000	155530000	1.58683e+08	161
LINF_350010700-T1-p1	LINF_350010700-T1-p1;LINF_320014400-T1-p1	60S ribosomal protein L18a - putative	7	157390000	151960000	163390000	157580000	162
LINF_160020400-T1-p1	LINF_160020400-T1-p1;LINF_160020300-T1-p1;LINF_160020200-T1-p1	paraflagellar rod protein 1D - putative	44	168690000	133320000	165530000	1.55847e+08	163
LINF_190006400-T1-p1	LINF_190006400-T1-p1	metallo-peptidase - Clan MG - Family M24	21	161730000	153120000	148340000	1.54397e+08	164
LINF_320024000-T1-p1	LINF_320024000-T1-p1	iron superoxide dismutase - putative	3	186270000	153620000	121970000	1.53953e+08	165
LINF_230014800-T1-p1	LINF_230014800-T1-p1	acetyl-CoA synthetase - putative	30	152340000	156400000	152910000	1.53883e+08	166
LINF_100008300-T1-p1	LINF_100008300-T1-p1	isocitrate dehydrogenase [NADP] - mitochondrial precursor - putative	31	155450000	140290000	160790000	1.52177e+08	167
LINF_070014900-T1-p1	LINF_070014900-T1-p1	splicing factor ptsr1-like protein	13	161590000	130410000	160050000	1.50683e+08	168
LINF_360016800-T1-p1	LINF_360016800-T1-p1;LINF_360016500-T1-p1	ribosomal protein L24 - putative	8	153640000	145080000	148960000	1.49227e+08	169
LINF_360030600-T1-p1	LINF_360030600-T1-p1	glyceraldehyde 3-phosphate dehydrogenase, cytosolic	10	152670000	147830000	146440000	148980000	170
LINF_350014500-T1-p1	LINF_350014500-T1-p1	aldose 1-epimerase - putative	15	152770000	138200000	151490000	1.47487e+08	171
LINF_300014400-T1-p1	LINF_300014400-T1-p1	adenosine kinase - putative	16	158720000	135570000	147900000	1.47397e+08	172
LINF_160009700-T1-p1	LINF_160009700-T1-p1	60S ribosomal protein L21 - putative	1	141970000	171950000	126950000	1.46957e+08	173
LINF_210014900-T1-p1	LINF_210014900-T1-p1	hypoxanthine-guanine phosphoribosyltransferase	9	141750000	177230000	115030000	144670000	174
LINF_270032200-T1-p1	LINF_270032200-T1-p1	heat shock protein DNAJ - putative	26	160930000	115940000	154460000	1.43777e+08	175
LINF_350016600-T1-p1	LINF_350016600-T1-p1	NADH-dependent fumarate reductase - putative	54	137480000	144460000	146390000	1.42777e+08	176
LINF_300036500-T1-p1	LINF_300036500-T1-p1	RNA-binding protein 42 (RNA-binding motif protein 42) - putative	9	137740000	146590000	142170000	1.42167e+08	177
LINF_350012900-T1-p1	LINF_350012900-T1-p1	aspartate aminotransferase - putative	28	137760000	145180000	143470000	1.42137e+08	178
LINF_240026800-T1-p1	LINF_240026800-T1-p1	transketolase	35	138910000	137920000	145400000	1.40743e+08	179
LINF_190013000-T1-p1	LINF_190013000-T1-p1	vps53-like domain protein	8	169640000	82988000	167890000	1.40173e+08	180
LINF_130017100-T1-p1	LINF_130017100-T1-p1	nucleobase transporter	10	144060000	101400000	174920000	1.40127e+08	181
LINF_250023800-T1-p1	LINF_250023800-T1-p1	pyruvate dehydrogenase E1 beta subunit - putative	17	139400000	127840000	152440000	1.39893e+08	182
LINF_060005200-T1-p1	LINF_060005200-T1-p1	WD domain - G-beta repeat - putative	37	139790000	132900000	145120000	139270000	183
LINF_110008400-T1-p1	LINF_110008400-T1-p1	14-3-3 protein 2 - putative	18	147380000	130820000	139360000	1.39187e+08	184
LINF_360081500-T1-p1	LINF_360081500-T1-p1	protein disulfide isomerase 2	39	140030000	132760000	142980000	138590000	185
LINF_290024200-T1-p1	LINF_290024200-T1-p1;LINF_290025100-T1-p1;LINF_290025000-T1-p1;LINF_290024400-T1-p1;LINF_290024300-T1-p1;LINF_290024700-T1-p1;LINF_290024600-T1-p1;LINF_290024800-T1-p1;LINF_290024900-T1-p1;LINF_290024500-T1-p1	paraflagellar rod protein 1D - putative	40	152830000	119280000	143330000	138480000	186
LINF_320034100-T1-p1	LINF_320034100-T1-p1;LINF_320033900-T1-p1	ribosomal protein L27 - putative	6	133920000	131610000	145730000	1.37087e+08	187
LINF_250020400-T1-p1	LINF_250020400-T1-p1	GTP-binding protein - putative	14	123850000	140240000	145070000	1.36387e+08	188
LINF_210007300-T1-p1	LINF_210007300-T1-p1	hypothetical protein - conserved	12	134490000	155400000	116630000	1.35507e+08	189
LINF_160013000-T1-p1	LINF_160013000-T1-p1	transaldolase - putative	20	128610000	151230000	126400000	1.35413e+08	190
LINF_220013200-T1-p1	LINF_220013200-T1-p1	hypothetical protein - conserved	32	147090000	107350000	151410000	1.35283e+08	191
LINF_290010100-T1-p1	LINF_290010100-T1-p1	ADF/Cofilin	17	137130000	120770000	147390000	1.35097e+08	192
LINF_360060500-T1-p1	LINF_360060500-T1-p1	hypothetical protein - conserved	37	139230000	129880000	135400000	1.34837e+08	193
LINF_300037600-T1-p1	LINF_300037600-T1-p1;LINF_280010400-T1-p1	ribosomal protein S26 - putative	5	138460000	131740000	134090000	1.34763e+08	194
LINF_350047100-T1-p1	LINF_350047100-T1-p1	poly(A)-binding protein 2	29	128500000	133550000	141470000	1.34507e+08	195
LINF_140020900-T1-p1	LINF_140020900-T1-p1	hypothetical protein - conserved	36	143510000	115030000	142520000	1.33687e+08	196
LINF_350014800-T1-p1	LINF_350014800-T1-p1	casein kinase - putative	18	134280000	125980000	139860000	1.33373e+08	197
LINF_250027000-T1-p1	LINF_250027000-T1-p1	2 -4-dihydroxyhept-2-ene-1 -7-dioic acid aldolase - putative	16	111750000	146490000	137690000	1.31977e+08	198
LINF_240007900-T1-p1	LINF_240007900-T1-p1	fumarate hydratase - putative	30	136960000	129810000	128210000	131660000	199
LINF_190017000-T1-p1	LINF_190017000-T1-p1	hypothetical protein - conserved	23	142580000	107300000	141780000	1.30553e+08	200
LINF_320028900-T1-p1	LINF_320028900-T1-p1	heat shock protein Hsp20 - putative	6	138890000	116830000	135810000	130510000	201
LINF_330033000-T1-p1	LINF_330033000-T1-p1	heat shock protein - putative	35	136450000	117850000	137100000	1.30467e+08	202
LINF_360044500-T1-p1	LINF_360044500-T1-p1	cysteine synthase	20	125520000	140150000	125320000	130330000	203
LINF_120010600-T1-p1	LINF_120010600-T1-p1;CON__Q3ZBD7	glucose-6-phosphate isomerase	29	130100000	131950000	128910000	130320000	204
LINF_330013000-T1-p1	LINF_330013000-T1-p1	paraflagellar rod component - putative	5	138260000	110850000	138350000	1.29153e+08	205
LINF_110012000-T1-p1	LINF_110012000-T1-p1;LINF_110011900-T1-p1	aminopeptidase - putative	29	129470000	119250000	138610000	129110000	206
LINF_320013900-T1-p1	LINF_320013900-T1-p1	hypothetical protein - conserved	15	132180000	115630000	139240000	1.29017e+08	207
LINF_060006300-T1-p1	LINF_060006300-T1-p1	cyclophilin	8	126490000	139030000	121410000	1.28977e+08	208
LINF_180012100-T1-p1	LINF_180012100-T1-p1	citrate synthase - putative	28	129240000	132170000	124480000	128630000	209
LINF_180021400-T1-p1	LINF_180021400-T1-p1	nonspecific nucleoside hydrolase	9	146570000	123390000	115070000	1.28343e+08	210
LINF_180005200-T1-p1	LINF_180005200-T1-p1	Ontology term:GO:0005524	18	123760000	120990000	137850000	1.27533e+08	211
LINF_050005900-T1-p1	LINF_050005900-T1-p1	phosphoprotein phosphatase - putative	34	123510000	130660000	127900000	1.27357e+08	212
LINF_200018000-T1-p1	LINF_200018000-T1-p1	small myristoylated protein 4 - putative	6	112840000	130760000	133910000	1.25837e+08	213
LINF_250028400-T1-p1	LINF_250028400-T1-p1;LINF_250028300-T1-p1	succinyl-CoA synthetase alpha subunit - putative	13	132300000	108790000	135210000	1.25433e+08	214
LINF_200013000-T1-p1	LINF_200013000-T1-p1	vesicular-fusion protein nsf - putative	34	120690000	127950000	126520000	1.25053e+08	215
LINF_300019400-T1-p1	LINF_300019400-T1-p1	amidohydrolase - putative	18	123700000	131380000	118750000	124610000	216
LINF_120011900-T1-p1	LINF_120011900-T1-p1	cytochrome oxidase subunit IV - putative	22	134480000	101000000	137380000	1.24287e+08	217
LINF_330017100-T1-p1	LINF_330017100-T1-p1	hypothetical protein - conserved	10	113590000	125510000	132010000	1.23703e+08	218
LINF_350036300-T1-p1	LINF_350036300-T1-p1	ATP-dependent RNA helicase - putative	47	124270000	114190000	128670000	1.22377e+08	219
LINF_080010700-T1-p1	LINF_080010700-T1-p1	eukaryotic translation initiation factor 2 beta subunit - putative	5	116570000	119760000	128690000	1.21673e+08	220
LINF_040009600-T1-p1	LINF_040009600-T1-p1	adenylosuccinate lyase - putative	22	114980000	145610000	101130000	1.20573e+08	221
LINF_350027200-T1-p1	LINF_350027200-T1-p1	RNA-binding protein - putative	17	130260000	110770000	115520000	118850000	222
LINF_310018700-T1-p1	LINF_310018700-T1-p1	Pyrophosphate-energized vacuolar membrane proton pump 1 - putative	27	111510000	99503000	144160000	118391000	223
LINF_140007400-T1-p1	LINF_140007400-T1-p1	Scavenger mRNA decapping enzyme C-term binding/HIT domain containing protein - putative	7	126840000	115130000	111880000	117950000	224
LINF_330034600-T1-p1	LINF_330034600-T1-p1	carboxypeptidase - putative	31	118620000	110290000	124360000	1.17757e+08	225
LINF_270010300-T1-p1	LINF_270010300-T1-p1;LINF_270010600-T1-p1;LINF_270010500-T1-p1;LINF_270010400-T1-p1;LINF_270010700-T1-p1;LINF_270010800-T1-p1;LINF_270011000-T1-p1;LINF_270010900-T1-p1	calpain-like cysteine peptidase - putative	34	139000000	104740000	109100000	1.17613e+08	226
LINF_360019800-T1-p1	LINF_360019800-T1-p1	Transitional endoplasmic reticulum ATPase - putative	44	129380000	110930000	110010000	1.16773e+08	227
LINF_280029400-T1-p1	LINF_280029400-T1-p1	glycosomal membrane protein - putative	5	102750000	106770000	137020000	1.15513e+08	228
LINF_140014500-T1-p1	LINF_140014500-T1-p1;LINF_140014400-T1-p1	calpain-like cysteine peptidase - putative	9	118580000	86629000	140060000	1.1509e+08	229
LINF_040012800-T1-p1	LINF_040012800-T1-p1;LINF_040012700-T1-p1	nascent polypeptide associated complex subunit- like protein - copy 2	7	128510000	103580000	112850000	114980000	230
LINF_360053900-T1-p1	LINF_360053900-T1-p1	hypothetical protein - conserved	4	133150000	98972000	112610000	1.14911e+08	231
LINF_230021100-T1-p1	LINF_230021100-T1-p1	T-complex protein 1 - gamma subunit - putative	35	117690000	110800000	114480000	1.14323e+08	232
LINF_350043400-T1-p1	LINF_350043400-T1-p1;LINF_350043300-T1-p1	60S ribosomal protein L23 - putative	9	102490000	112100000	125810000	1.13467e+08	233
LINF_290030100-T1-p1	LINF_290030100-T1-p1	metallo-peptidase - Clan MA(E) Family M1	34	117740000	110590000	106250000	1.11527e+08	234
LINF_360005100-T1-p1	LINF_360005100-T1-p1;LINF_350005100-T1-p1;LINF_310040900-T1-p1;LINF_250031800-T1-p1;LINF_210005100-T1-p1;LINF_020005100-T1-p1;LINF_150005000-T1-p1	histone H4	5	113350000	75241000	145710000	1.11434e+08	235
LINF_340014400-T1-p1	LINF_340014400-T1-p1;LINF_150007100-T1-p1	60S ribosomal protein L13a - putative	9	134880000	106990000	92207000	111359000	236
LINF_260006300-T1-p1	LINF_260006300-T1-p1	adenine phosphoribosyltransferase	9	116340000	105070000	111900000	1.11103e+08	237
LINF_160007400-T1-p1	LINF_160007400-T1-p1	protein tyrosine phosphatase-like protein	7	96577000	120860000	114510000	110649000	238
LINF_300012500-T1-p1	LINF_300012500-T1-p1	co-chaperone GrpE - putative	13	111210000	97786000	122580000	1.10525e+08	239
LINF_090016000-T1-p1	LINF_090016000-T1-p1;LINF_090016050-T1-p1	elongation factor-1 gamma	16	108930000	102120000	120250000	1.10433e+08	240
LINF_360022600-T1-p1	LINF_360022600-T1-p1	clathrin heavy chain - putative	80	108670000	110640000	111630000	1.10313e+08	241
LINF_240012700-T1-p1	LINF_240012700-T1-p1	malic enzyme - putative	21	107530000	117470000	104950000	1.09983e+08	242
LINF_360066000-T1-p1	LINF_360066000-T1-p1	isoleucyl-tRNA synthetase - putative	55	107110000	110390000	109760000	1.09087e+08	243
LINF_180019200-T1-p1	LINF_180019200-T1-p1	pyruvate dehydrogenase E1 component alpha subunit - putative	18	106860000	106320000	113110000	1.08763e+08	244
LINF_350038300-T1-p1	LINF_350038300-T1-p1;LINF_350038200-T1-p1	60S ribosomal subunit protein L31 - putative	9	105700000	108370000	111960000	1.08677e+08	245
LINF_180020800-T1-p1	LINF_180020800-T1-p1	P-type H+-ATPase - putative	38	101580000	109950000	114300000	108610000	246
LINF_360031200-T1-p1	LINF_360031200-T1-p1;LINF_360031300-T1-p1	sterol 24-c-methyltransferase - putative	17	107930000	113830000	102890000	1.08217e+08	247
LINF_350050100-T1-p1	LINF_350050100-T1-p1	mitochondrial phosphate transporter - putative	20	95407000	111030000	117010000	1.07816e+08	248
LINF_300042300-T1-p1	LINF_300042300-T1-p1	ribosomal protein L15 - putative	6	108240000	110300000	102170000	1.06903e+08	249
LINF_110016000-T1-p1	LINF_110016000-T1-p1	pyruvate phosphate dikinase - putative	61	108380000	102910000	109160000	1.06817e+08	250
LINF_360081100-T1-p1	LINF_360081100-T1-p1	T-complex protein 1 - theta subunit - putative	30	107050000	99099000	113000000	106383000	251
LINF_270017500-T1-p1	LINF_270017500-T1-p1	mitochondrial RNA binding protein 1	9	108830000	97049000	112930000	1.0627e+08	252
LINF_360034400-T1-p1	LINF_360034400-T1-p1	dihydrolipoamide acetyltransferase precursor - putative	18	118980000	94136000	104590000	105902000	253
LINF_050005200-T1-p1	LINF_050005200-T1-p1	ras-like small GTPases - putative	8	103810000	101140000	108910000	104620000	254
LINF_360079400-T1-p1	LINF_360079400-T1-p1	ATP synthase delta (OSCP) subunit - putative	13	102170000	91643000	119530000	1.04448e+08	255
LINF_270019700-T1-p1	LINF_270019700-T1-p1	KH domain containing protein - putative	30	104360000	96116000	111500000	103992000	256
LINF_150009200-T1-p1	LINF_150009200-T1-p1;LINF_150009100-T1-p1	60S acidic ribosomal protein - putative	6	105890000	123900000	82169000	1.03986e+08	257
LINF_190005400-T1-p1	LINF_190005400-T1-p1	40S ribosomal protein S2	17	105500000	89502000	115930000	103644000	258
LINF_160010500-T1-p1	LINF_160010500-T1-p1	aspartate carbamoyltransferase - putative	19	101120000	122450000	85527000	1.03032e+08	259
LINF_360015700-T1-p1	LINF_360015700-T1-p1;LINF_360015600-T1-p1	40S ribosomal protein S10 - putative	8	113690000	97533000	97366000	102863000	260
LINF_260013000-T1-p1	LINF_260013000-T1-p1	type II (glutathione peroxidase-like) tryparedoxin peroxidase	17	98538000	95915000	113720000	1.02724e+08	261
LINF_030008200-T1-p1	LINF_030008200-T1-p1	DDRGK domain containing protein - putative	8	86396000	128870000	92409000	1.02558e+08	262
LINF_350038800-T1-p1	LINF_350038800-T1-p1	6-phosphogluconate dehydrogenase - decarboxylating - putative	19	92894000	114510000	96314000	1.01239e+08	263
LINF_280037300-T1-p1	LINF_280037300-T1-p1	glutamate dehydrogenase - putative	27	100530000	104200000	98828000	101186000	264
LINF_350017900-T1-p1	LINF_350017900-T1-p1	ubiquitin-conjugating enzyme E2 - putative	6	102290000	118650000	82247000	1.01062e+08	265
LINF_270026900-T1-p1	LINF_270026900-T1-p1	FtsJ cell division protein - putative	14	104320000	86172000	112490000	100994000	266
LINF_040007500-T1-p1	LINF_040007500-T1-p1	GRAM domain containing protein - putative	13	97568000	100670000	103680000	1.00639e+08	267
LINF_320040200-T1-p1	LINF_320040200-T1-p1	chaperonin alpha subunit - putative	37	96101000	102520000	102810000	100477000	268
LINF_350053300-T1-p1	LINF_350053300-T1-p1	cyclophilin 40	14	106320000	82271000	110750000	9.97803e+07	269
LINF_280014900-T1-p1	LINF_280014900-T1-p1	Archaic translocase outer mitochondrial membrane 46 kDa subunit - putative	16	88430000	105560000	102330000	9.87733e+07	270
LINF_150008200-T1-p1	LINF_150008200-T1-p1	ribonucleoprotein p18 - mitochondrial precursor - putative	14	108090000	89110000	98587000	9.85957e+07	271
LINF_110005900-T1-p1	LINF_110005900-T1-p1	seryl-tRNA synthetase - putative	24	98511000	92654000	102960000	9.80417e+07	272
LINF_200006000-T1-p1	LINF_200006000-T1-p1	phosphoglycerate kinase C - glycosomal	25	87774000	96716000	108680000	9.77233e+07	273
LINF_170020100-T1-p1	LINF_170020100-T1-p1	hypothetical protein - conserved	6	100580000	93325000	95186000	9.63637e+07	274
LINF_260018800-T1-p1	LINF_260018800-T1-p1	prefoldin-like protein	9	94286000	91268000	103260000	9.62713e+07	275
LINF_260028900-T1-p1	LINF_260028900-T1-p1;LINF_260028800-T1-p1	60S ribosomal protein L35 - putative	1	78612000	105920000	104060000	9.61973e+07	276
LINF_290007500-T1-p1	LINF_290007500-T1-p1	thymine-7-hydroxylase - putative	11	93655000	91804000	100990000	95483000	277
LINF_090018100-T1-p1	LINF_090018100-T1-p1	translation initiation factor EIF-2B gamma subunit - putative	18	90683000	98597000	95221000	9.48337e+07	278
LINF_050007700-T1-p1	LINF_050007700-T1-p1	protein tyrosine phosphatase - putative	11	84374000	106950000	93115000	94813000	279
LINF_100015800-T1-p1	LINF_100015800-T1-p1	small GTP-binding protein Rab11 - putative	13	95030000	100140000	86989000	94053000	280
LINF_320009400-T1-p1	LINF_320009400-T1-p1;LINF_240005200-T1-p1	60S ribosomal protein L17 - putative	6	91080000	100590000	90370000	9.40133e+07	281
LINF_280031400-T1-p1	LINF_280031400-T1-p1	Vacuolar proton pump subunit B - putative	31	95900000	92626000	92847000	93791000	282
LINF_130015600-T1-p1	LINF_130015600-T1-p1	NADH-cytochrome b5 reductase - putative	18	91966000	93071000	92131000	9.23893e+07	283
LINF_160010700-T1-p1	LINF_160010700-T1-p1	orotidine-5-phosphate decarboxylase/orotate phosphoribosyltransferase - putative	27	90654000	94527000	91885000	9.23553e+07	284
LINF_190012000-T1-p1	LINF_190012000-T1-p1	glycosomal malate dehydrogenase	15	90954000	98473000	87517000	9.23147e+07	285
LINF_330007600-T1-p1	LINF_330007600-T1-p1	thiol-dependent reductase 1	21	88479000	93344000	94352000	9.20583e+07	286
LINF_290011200-T1-p1	LINF_290011200-T1-p1	ATP-binding cassette subfamily A - member 1 - putative	42	99398000	84287000	90922000	9.15357e+07	287
LINF_120005600-T1-p1	LINF_120005600-T1-p1	ribonuclease mar1	8	83699000	88047000	102550000	91432000	288
LINF_360054400-T1-p1	LINF_360054400-T1-p1;LINF_130010500-T1-p1	60S ribosomal protein L18 - putative	7	80873000	101090000	89636000	90533000	289
LINF_170019500-T1-p1	LINF_170019500-T1-p1	histone H2B	4	75747000	90616000	104860000	9.04077e+07	290
LINF_110013800-T1-p1	LINF_110013800-T1-p1	hypothetical protein - conserved	13	94892000	74962000	98665000	8.95063e+07	291
LINF_100017000-T1-p1	LINF_100017000-T1-p1;LINF_100016800-T1-p1;LINF_100015400-T1-p1	histone H3 - putative	3	59237000	139640000	69290000	89389000	292
LINF_350006100-T1-p1	LINF_350006100-T1-p1	Ubiquinol-cytochrome C reductase complex 14kD subunit - putative	8	84601000	87613000	92392000	88202000	293
LINF_150022800-T1-p1	LINF_150022800-T1-p1	ribosomal protein S6 - putative	6	84262000	98019000	81408000	8.78963e+07	294
LINF_360070500-T1-p1	LINF_360070500-T1-p1	eukaryotic translation initation factor 4 gamma - putative	26	86002000	94942000	82248000	8.77307e+07	295
LINF_330037300-T1-p1	LINF_330037300-T1-p1	hypothetical protein - conserved	10	86354000	93813000	81891000	8.73527e+07	296
LINF_290012700-T1-p1	LINF_290012700-T1-p1	heat shock protein 90 - putative	34	83445000	91592000	86678000	8.72383e+07	297
LINF_050009500-T1-p1	LINF_050009500-T1-p1	hypothetical protein - conserved	10	85903000	83432000	91740000	87025000	298
LINF_210009700-T1-p1	LINF_210009700-T1-p1	hypothetical protein - conserved	23	84012000	81397000	94035000	8.64813e+07	299
LINF_120014500-T1-p1	LINF_120014500-T1-p1;LINF_120014100-T1-p1;LINF_120013800-T1-p1	hypothetical protein - conserved	1	100850000	68659000	88844000	8.61177e+07	300
LINF_270014800-T1-p1	LINF_270014800-T1-p1	WD domain - G-beta repeat - putative	11	82440000	79894000	95364000	8.58993e+07	301
LINF_270019800-T1-p1	LINF_270019800-T1-p1	arginyl-tRNA synthetase - putative	41	87789000	83289000	85350000	85476000	302
LINF_340008600-T1-p1	LINF_340008600-T1-p1	eukaryotic translation initiation factor 5 - putative	18	89478000	79540000	86084000	85034000	303
LINF_360044800-T1-p1	LINF_360044800-T1-p1	EF-hand domain pair/EF-hand domain containing protein - putative	6	92280000	73739000	88139000	8.47193e+07	304
LINF_350032700-T1-p1	LINF_350032700-T1-p1	galactokinase-like protein	27	86396000	83358000	84124000	84626000	305
LINF_300033900-T1-p1	LINF_300033900-T1-p1	hypothetical protein - conserved	8	84430000	70492000	97380000	8.41007e+07	306
LINF_360026000-T1-p1	LINF_360026000-T1-p1	inosine-guanosine transporter	15	72711000	86045000	91333000	83363000	307
LINF_250007100-T1-p1	LINF_250007100-T1-p1	wd repeat-containing protein 19	29	75089000	81145000	89695000	8.19763e+07	308
LINF_300023700-T1-p1	LINF_300023700-T1-p1	ATPase family associated with various cellular activities (AAA)/AAA domain containing protein - putative	3	87522000	81921000	75161000	8.15347e+07	309
LINF_120011500-T1-p1	LINF_120011500-T1-p1	alanine aminotransferase	13	82899000	77745000	83337000	81327000	310
LINF_080016000-T1-p1	LINF_080016000-T1-p1	stress-induced protein sti1	39	86343000	67459000	89175000	8.09923e+07	311
LINF_270020600-T1-p1	LINF_270020600-T1-p1;LINF_270020500-T1-p1	60S acidic ribosomal protein P0 - putative	14	81384000	76989000	82156000	8.01763e+07	312
LINF_250027100-T1-p1	LINF_250027100-T1-p1	hypothetical protein - conserved	19	82250000	67855000	89741000	7.99487e+07	313
LINF_170005000-T1-p1	LINF_170005000-T1-p1	hypothetical protein - conserved	36	82775000	74419000	81620000	7.96047e+07	314
LINF_250022700-T1-p1	LINF_250022700-T1-p1	hypothetical protein - conserved	15	76575000	77584000	82374000	7.88443e+07	315
LINF_210015000-T1-p1	LINF_210015000-T1-p1	xanthine phosphoribosyltransferase	9	74972000	76122000	83626000	78240000	316
LINF_360010100-T1-p1	LINF_360010100-T1-p1	hypothetical protein - conserved	5	72498000	63413000	98255000	7.80553e+07	317
LINF_110007300-T1-p1	LINF_110007300-T1-p1	proteasome alpha 7 subunit - putative	13	76759000	59193000	98108000	78020000	318
LINF_360069000-T1-p1	LINF_360069000-T1-p1	Haloacid dehalogenase-like hydrolase - putative	12	79325000	86064000	67939000	77776000	319
LINF_150007600-T1-p1	LINF_150007600-T1-p1	lysyl-tRNA synthetase - putative	30	74727000	75235000	83339000	77767000	320
LINF_230014100-T1-p1	LINF_230014100-T1-p1	hypothetical protein - conserved	14	70471000	74167000	87329000	7.73223e+07	321
LINF_050017300-T1-p1	LINF_050017300-T1-p1	prefoldin subunit - putative	11	80664000	64300000	86932000	7.72987e+07	322
LINF_300015300-T1-p1	LINF_300015300-T1-p1	p22 protein precursor - putative	8	61324000	117250000	52724000	7.70993e+07	323
LINF_330042600-T1-p1	LINF_330042600-T1-p1	h1 histone-like protein	3	89606000	56332000	85077000	77005000	324
LINF_310036600-T1-p1	LINF_310036600-T1-p1	ADP-ribosylation factor - putative	14	75619000	79771000	74964000	7.67847e+07	325
LINF_110016300-T1-p1	LINF_110016300-T1-p1	hypothetical protein - conserved	9	75366000	69805000	85024000	7.67317e+07	326
LINF_130013600-T1-p1	LINF_130013600-T1-p1	mitochondrial processing peptidase alpha subunit - putative	19	74550000	75869000	79088000	7.65023e+07	327
LINF_360005700-T1-p1	LINF_360005700-T1-p1	stress-inducible protein STI1 homolog	18	82364000	60814000	85581000	76253000	328
LINF_280012100-T1-p1	LINF_280012100-T1-p1	BTB/POZ domain containing protein - putative	3	95964000	79607000	52617000	7.60627e+07	329
LINF_320009600-T1-p1	LINF_320009600-T1-p1	40S ribosomal protein S2	2	78701000	56415000	92718000	7.59447e+07	330
LINF_260021500-T1-p1	LINF_260021500-T1-p1;LINF_260021400-T1-p1;LINF_260021300-T1-p1	40S ribosomal protein S33 - putative	5	78512000	65595000	83520000	7.58757e+07	331
LINF_330013700-T1-p1	LINF_330013700-T1-p1	sterol C-24 reductase - putative	8	67631000	81144000	76665000	7.51467e+07	332
LINF_190021700-T1-p1	LINF_190021700-T1-p1	FK506-binding protein (FKBP)-type peptidyl-prolyl isomerase - putative	25	77885000	71458000	74704000	7.46823e+07	333
LINF_250006300-T1-p1	LINF_250006300-T1-p1	electron transfer flavoprotein - putative	10	72743000	81899000	69210000	7.46173e+07	334
LINF_300030900-T1-p1	LINF_300030900-T1-p1	reticulon domain protein - 22 kDa potentially aggravating protein (paple22)	9	85173000	60267000	78037000	7.44923e+07	335
LINF_240026000-T1-p1	LINF_240026000-T1-p1	STOP axonemal protein - putative	10	81288000	68062000	73370000	74240000	336
LINF_210018500-T1-p1	LINF_210018500-T1-p1	T-complex protein 1 - delta subunit - putative	24	73079000	76260000	72049000	73796000	337
LINF_140006800-T1-p1	LINF_140006800-T1-p1	AhpC/TSA family/Thioredoxin-like - putative	14	71358000	70128000	79698000	73728000	338
LINF_360022900-T1-p1	LINF_360022900-T1-p1	proteasome subunit beta type-5 - putative	13	69563000	70107000	80961000	7.35437e+07	339
LINF_130022100-T1-p1	LINF_130022100-T1-p1;REV__LINF_340048900-T1-p1	chaperonin TCP20 - putative	32	72995000	68753000	78535000	7.34277e+07	340
LINF_070012000-T1-p1	LINF_070012000-T1-p1	hypothetical protein - conserved	21	76024000	76408000	67025000	7.31523e+07	341
LINF_280032900-T1-p1	LINF_280032900-T1-p1;LINF_280032800-T1-p1	40S ribosomal protein S17 - putative	9	76531000	72961000	68933000	7.28083e+07	342
LINF_270030700-T1-p1	LINF_270030700-T1-p1	GTP binding protein - putative	14	67499000	72752000	78071000	72774000	343
LINF_130021300-T1-p1	LINF_130021300-T1-p1	ubiquitin-conjugating enzyme - putative	11	72367000	73579000	71848000	72598000	344
LINF_210011100-T1-p1	LINF_210011100-T1-p1	dihydrolipoamide acetyltransferase precursorlike protein	11	78413000	58588000	80619000	72540000	345
LINF_320028100-T1-p1	LINF_320028100-T1-p1	SAC3/GANP/Nin1/mts3/eIF-3 p25 family/COP9 signalosome - subunit CSN8 - putative	17	70680000	72155000	73603000	72146000	346
LINF_350008800-T1-p1	LINF_350008800-T1-p1	ATP-dependent DEAD-box RNA helicase - putative	25	69119000	64195000	82781000	7.20317e+07	347
LINF_360039100-T1-p1	LINF_360039100-T1-p1	ATP synthase - putative	12	71415000	67627000	75316000	7.14527e+07	348
LINF_210024400-T1-p1	LINF_210024400-T1-p1	hypothetical protein - conserved	25	72572000	73931000	66193000	7.08987e+07	349
LINF_290029300-T1-p1	LINF_290029300-T1-p1	rab-GDP dissociation inhibitor - putative	25	70102000	69736000	72535000	70791000	350
LINF_140012100-T1-p1	LINF_140012100-T1-p1	fatty acid elongase - putative	5	63149000	74300000	74552000	70667000	351
LINF_100015200-T1-p1	LINF_100015200-T1-p1	nuclear transport factor 2 - putative	5	67465000	67636000	75900000	7.03337e+07	352
LINF_310009700-T1-p1	LINF_310009700-T1-p1	cytoskeleton-associated protein CAP5.5 - putative	35	69155000	68697000	72721000	70191000	353
LINF_310030700-T1-p1	LINF_310030700-T1-p1	3 -2-trans-enoyl-CoA isomerase - mitochondrial precursor - putative	12	68960000	65370000	76034000	7.01213e+07	354
LINF_150020200-T1-p1	LINF_150020200-T1-p1;LINF_150020100-T1-p1;LINF_150020000-T1-p1;LINF_150019900-T1-p1	nucleoside transporter 1 - putative	11	61648000	67392000	80980000	7.00067e+07	355
LINF_190016600-T1-p1	LINF_190016600-T1-p1	proteasome regulatory non-ATP-ase subunit 9 - putative	23	68752000	70947000	70266000	6.99883e+07	356
LINF_340044200-T1-p1	LINF_340044200-T1-p1	vacuolar ATP synthase catalytic subunit A - putative	38	68030000	70656000	71271000	6.99857e+07	357
LINF_340018500-T1-p1	LINF_340018500-T1-p1	hypothetical protein	3	69623000	67515000	72565000	69901000	358
LINF_360050900-T1-p1	LINF_360050900-T1-p1	oxidoreductase - putative	13	68307000	64198000	76839000	6.97813e+07	359
LINF_040010800-T1-p1	LINF_040010800-T1-p1	spermidine synthase	16	68463000	68585000	71901000	6.96497e+07	360
LINF_350005800-T1-p1	LINF_350005800-T1-p1	prohibitin - putative	14	65942000	76890000	65625000	6.94857e+07	361
LINF_340005000-T1-p1	LINF_340005000-T1-p1	short chain dehydrogenase - putative	14	64958000	68299000	74371000	6.92093e+07	362
LINF_090018500-T1-p1	LINF_090018500-T1-p1	mitochondrial RNA binding protein 2	6	71344000	76200000	59847000	6.91303e+07	363
LINF_350055900-T1-p1	LINF_350055900-T1-p1	polyadenylate-binding protein 1	18	67302000	70145000	69890000	6.91123e+07	364
LINF_140009200-T1-p1	LINF_140009200-T1-p1	hypothetical protein - conserved	8	61491000	68707000	76025000	68741000	365
LINF_290006100-T1-p1	LINF_290006100-T1-p1	proteasome regulatory non-ATPase subunit - putative	39	67861000	68656000	69386000	6.86343e+07	366
LINF_200020900-T1-p1	LINF_200020900-T1-p1	Suppressor of G2 allele of SKP1 - putative	10	74325000	59103000	70527000	67985000	367
LINF_260011600-T1-p1	LINF_260011600-T1-p1	protein disulfide isomerase - putative	14	75042000	63937000	64930000	6.79697e+07	368
LINF_190022000-T1-p1	LINF_190022000-T1-p1	inosine-5-monophosphate dehydrogenase	27	66590000	64977000	71964000	6.78437e+07	369
LINF_220011600-T1-p1	LINF_220011600-T1-p1	proteasome regulatory ATPase subunit 5 - putative	20	68256000	66926000	67231000	67471000	370
LINF_300008500-T1-p1	LINF_300008500-T1-p1	kinesin - putative	30	63053000	64091000	74636000	67260000	371
LINF_030014900-T1-p1	LINF_030014900-T1-p1	eukaryotic initiation factor 2a - putative	23	69011000	62127000	70143000	6.70937e+07	372
LINF_240021800-T1-p1	LINF_240021800-T1-p1	Succinate dehydrogenase [ubiquinone] flavoprotein subunit - mitochondrial	27	66327000	65323000	69574000	6.70747e+07	373
LINF_290014400-T1-p1	LINF_290014400-T1-p1	ADP-ribosylation factor-like protein 3A - putative	16	67432000	63589000	69507000	6.68427e+07	374
LINF_360022700-T1-p1	LINF_360022700-T1-p1	poly-zinc finger protein 2 - putative	6	87689000	34224000	77941000	66618000	375
LINF_290018300-T1-p1	LINF_290018300-T1-p1	Hsp70 protein/TPR repeat/Tetratricopeptide repeat - putative	39	68460000	60408000	70983000	66617000	376
LINF_070016300-T1-p1	LINF_070016300-T1-p1	RNA binding protein-like protein	4	63142000	69648000	66744000	6.65113e+07	377
LINF_070006200-T1-p1	LINF_070006200-T1-p1	Sec7 domain containing protein - putative	14	63280000	72844000	61966000	66030000	378
LINF_300036900-T1-p1	LINF_300036900-T1-p1	valyl-tRNA synthetase - putative	42	65016000	69551000	63403000	65990000	379
LINF_340047600-T1-p1	LINF_340047600-T1-p1	nucleolar protein family a member-like protein	3	70712000	61582000	65614000	6.59693e+07	380
LINF_210009200-T1-p1	LINF_210009200-T1-p1	Protein of unknown function (DUF667) - putative	11	58236000	77046000	62047000	6.57763e+07	381
LINF_080017500-T1-p1	LINF_080017500-T1-p1	Amidinotransferase - putative	15	71748000	49477000	75776000	65667000	382
LINF_040010500-T1-p1	LINF_040010500-T1-p1	Tetratricopeptide repeat/TPR repeat - putative	33	61003000	70336000	64982000	6.54403e+07	383
LINF_090022300-T1-p1	LINF_090022300-T1-p1	Rhodanese-like domain containing protein - putative	4	70839000	68831000	56040000	6.52367e+07	384
LINF_190011200-T1-p1	LINF_190011200-T1-p1	histone H3 variant - putative	3	59307000	72886000	62907000	6.50333e+07	385
LINF_220021600-T1-p1	LINF_220021600-T1-p1	alanyl-tRNA synthetase - putative	55	62690000	65529000	66718000	64979000	386
LINF_220008000-T1-p1	LINF_220008000-T1-p1	hypothetical protein - conserved	24	63985000	62454000	68372000	64937000	387
LINF_140009900-T1-p1	LINF_140009900-T1-p1	N-terminal conserved domain of Nudc./CS domain containing protein - putative	17	67704000	58196000	68137000	64679000	388
LINF_280014500-T1-p1	LINF_280014500-T1-p1	ribonucleoside-diphosphate reductase large chain - putative	33	63193000	64441000	66168000	6.46007e+07	389
LINF_280036800-T1-p1	LINF_280036800-T1-p1	cytosolic malate dehydrogenase	20	63288000	62947000	67465000	6.45667e+07	390
LINF_060018900-T1-p1	LINF_060018900-T1-p1	coproporphyrinogen III oxidase	22	65568000	60875000	66760000	64401000	391
LINF_160016100-T1-p1	LINF_160016100-T1-p1	ubiquitin fold modifier protein - putative	4	69198000	65166000	58210000	6.41913e+07	392
LINF_080017300-T1-p1	LINF_080017300-T1-p1	hypothetical protein - conserved	4	71196000	48007000	73006000	6.40697e+07	393
LINF_200016800-T1-p1	LINF_200016800-T1-p1;LINF_200016900-T1-p1	cysteine peptidase - Clan CA - family C2 - putative	18	62990000	58973000	69543000	6.38353e+07	395
LINF_220012100-T1-p1	LINF_220012100-T1-p1	prefoldin 5-like protein	8	63503000	59798000	66596000	63299000	396
LINF_310034100-T1-p1	LINF_310034100-T1-p1	calreticulin - putative	13	66200000	47932000	74956000	6.30293e+07	397
LINF_320015100-T1-p1	LINF_320015100-T1-p1	Staphylococcal nuclease homologue/Tudor domain containing protein - putative	39	62359000	64290000	62400000	6.30163e+07	398
LINF_260027600-T1-p1	LINF_260027600-T1-p1;LINF_030007300-T1-p1	ribosomal protein L38 - putative	4	62321000	54696000	71153000	6.27233e+07	399
LINF_120009000-T1-p1	LINF_120009000-T1-p1	hypothetical protein - conserved	15	61146000	64771000	62236000	6.27177e+07	400
LINF_090019400-T1-p1	LINF_090019400-T1-p1	Zinc finger- C3HC4 type (RING finger) containing protein - putative	2	93077000	38333000	56412000	6.26073e+07	401
LINF_350017000-T1-p1	LINF_350017000-T1-p1	short chain dehydrogenase - putative	14	64935000	57811000	64579000	6.24417e+07	402
LINF_320016400-T1-p1	LINF_320016400-T1-p1	small nuclear ribonucleoprotein - putative	3	53946000	59165000	73710000	6.22737e+07	403
LINF_270033860-T1-p1	LINF_270033860-T1-p1	hypothetical protein (non-ATG)	38	63231000	58813000	64731000	6.22583e+07	404
LINF_360081900-T1-p1	LINF_360081900-T1-p1	eukaryotic translation initiation factor 3 subunit 8 - putative	37	61320000	55386000	67458000	61388000	405
LINF_160022200-T1-p1	LINF_160022200-T1-p1	prohibitin	13	55398000	70385000	58373000	6.13853e+07	406
LINF_080015800-T1-p1	LINF_080015800-T1-p1	hypothetical protein	30	65191000	60704000	58033000	6.13093e+07	407
LINF_210024300-T1-p1	LINF_210024300-T1-p1	ATP-dependent RNA helicase SUB2 - putative	31	60339000	58570000	64957000	6.12887e+07	408
LINF_260020700-T1-p1	LINF_260020700-T1-p1	thimet oligopeptidase - putative	34	62855000	61205000	58307000	60789000	409
LINF_350019900-T1-p1	LINF_350019900-T1-p1	arginase	14	61485000	63576000	57110000	6.07237e+07	410
LINF_300016800-T1-p1	LINF_300016800-T1-p1	importin alpha - putative	15	61434000	66596000	53176000	60402000	411
LINF_340006100-T1-p1	LINF_340006100-T1-p1	adenylate kinase - putative	16	69632000	52850000	58640000	60374000	412
LINF_140012300-T1-p1	LINF_140012300-T1-p1	fatty acid elongase - putative	6	59464000	55302000	66305000	60357000	413
LINF_280020100-T1-p1	LINF_280020100-T1-p1	DNA polymerase kappa - putative	9	61129000	50682000	68095000	5.99687e+07	414
LINF_280006000-T1-p1	LINF_280006000-T1-p1	proteasome beta 3 subunit - putative	4	62627000	56772000	60349000	59916000	415
LINF_100011200-T1-p1	LINF_100011200-T1-p1	GP63 - leishmanolysin	4	52965000	56256000	70190000	5.98037e+07	416
LINF_070008800-T1-p1	LINF_070008800-T1-p1	ATP-dependent DEAD/H RNA helicase - putative	21	55334000	68312000	55480000	5.97087e+07	417
LINF_210013900-T1-p1	LINF_210013900-T1-p1	methionyl-tRNA synthetase	32	59761000	58456000	59763000	5.93267e+07	418
LINF_360047700-T1-p1	LINF_360047700-T1-p1	eukaryotic translation initiation factor 3 subunit 2 - putative	14	57773000	55868000	63969000	5.92033e+07	420
LINF_290019000-T1-p1	LINF_290019000-T1-p1	carnitine/choline acetyltransferase - putative	31	59334000	60360000	57916000	5.92033e+07	419
LINF_280020800-T1-p1	LINF_280020800-T1-p1	Protein of unknown function (DUF423) - putative	8	45007000	76629000	55415000	59017000	421
LINF_250017400-T1-p1	LINF_250017400-T1-p1	cytochrome c oxidase VII - putativeGeneDB:LmjF.25.1130	8	69324000	60958000	46719000	5.90003e+07	422
LINF_280016800-T1-p1	LINF_280016800-T1-p1	WD domain - G-beta repeat - putative	28	54058000	57934000	64976000	5.89893e+07	423
LINF_340035100-T1-p1	LINF_340035100-T1-p1	regulatory subunit of protein kinase a-like protein	28	62372000	59424000	54982000	58926000	424
LINF_060016300-T1-p1	LINF_060016300-T1-p1	protein disulfide isomerase	1	53684000	68219000	54578000	58827000	425
LINF_250030600-T1-p1	LINF_250030600-T1-p1	AGC family serine/threonine kinase - putative	22	59663000	60227000	55296000	5.83953e+07	426
LINF_040009500-T1-p1	LINF_040009500-T1-p1	cysteine peptidase - Clan CA - family C2 - putative	27	59049000	55456000	59842000	5.81157e+07	427
LINF_090006100-T1-p1	LINF_090006100-T1-p1	calmodulin-like protein containing EF hand domain	27	64011000	50846000	59210000	5.80223e+07	428
LINF_270024200-T1-p1	LINF_270024200-T1-p1	hypothetical protein - conserved	13	56603000	46021000	71413000	5.80123e+07	429
LINF_330033600-T1-p1	LINF_330033600-T1-p1	hypothetical protein - conserved	31	68241000	47795000	57764000	5.79333e+07	430
LINF_120007000-T1-p1	LINF_120007000-T1-p1	ubiquitin hydrolase - putative	7	67974000	53005000	52770000	5.79163e+07	431
LINF_290022700-T1-p1	LINF_290022700-T1-p1	hypothetical protein - conserved	4	76617000	48144000	48804000	57855000	432
LINF_170008800-T1-p1	LINF_170008800-T1-p1	cystathionine beta-synthase	10	58425000	47085000	67103000	5.75377e+07	433
LINF_240012800-T1-p1	LINF_240012800-T1-p1	malic enzyme - putative	23	55977000	59024000	57428000	5.74763e+07	434
LINF_210013400-T1-p1	LINF_210013400-T1-p1	proteasome regulatory non-ATP-ase subunit 5 - putative	22	57657000	58935000	55294000	5.72953e+07	435
LINF_250005800-T1-p1	LINF_250005800-T1-p1	poly(A)-binding protein 3	18	56402000	55124000	59419000	5.69817e+07	436
LINF_020010800-T1-p1	LINF_020010800-T1-p1	hypothetical protein - conserved	7	60023000	52609000	58280000	5.69707e+07	437
LINF_300032600-T1-p1	LINF_300032600-T1-p1	small glutamine-rich tetratricopeptide repeat protein - putative	24	61768000	50061000	59020000	5.69497e+07	438
LINF_320034300-T1-p1	LINF_320034300-T1-p1	hypothetical protein - conserved	16	58118000	60500000	52074000	5.68973e+07	439
LINF_360072700-T1-p1	LINF_360072700-T1-p1	chaperone protein DNAj - putative	17	54898000	59329000	56183000	5.68033e+07	440
LINF_290029700-T1-p1	LINF_290029700-T1-p1	dynamin-1-like protein	39	57451000	57944000	54676000	5.66903e+07	441
LINF_040016900-T1-p1	LINF_040016900-T1-p1	RNA-binding protein - putative	9	60763000	52457000	56622000	56614000	442
LINF_180022100-T1-p1	LINF_180022100-T1-p1	hypothetical protein - conserved	6	54817000	50597000	63333000	56249000	444
LINF_260024800-T1-p1	LINF_260024800-T1-p1	microtubule-associated protein - putative	88	62284000	47853000	58352000	56163000	445
LINF_080006700-T1-p1	LINF_080006700-T1-p1	hypothetical protein - conserved	20	53849000	58777000	55693000	5.61063e+07	446
LINF_170014800-T1-p1	LINF_170014800-T1-p1	guanosine monophosphate reductase	27	57063000	54349000	56792000	56068000	447
LINF_350012100-T1-p1	LINF_350012100-T1-p1	proteasome activator protein pa26 - putative	11	50812000	52640000	64602000	56018000	448
LINF_350025500-T1-p1	LINF_350025500-T1-p1	60S ribosomal protein L32	2	55825000	55464000	56456000	55915000	449
LINF_290013700-T1-p1	LINF_290013700-T1-p1	high mobility group protein homolog tdp-1 - putative	13	55851000	59264000	52501000	55872000	450
LINF_210028100-T1-p1	LINF_210028100-T1-p1	proteasome subunit alpha type-5 - putative	14	57284000	49494000	60838000	55872000	451
LINF_360013000-T1-p1	LINF_360013000-T1-p1	zinc finger protein family member - putative	15	58591000	50478000	58453000	5.58407e+07	452
LINF_100007300-T1-p1	LINF_100007300-T1-p1	Nucleolar protein 56 - putative	25	58405000	50178000	58137000	5.55733e+07	453
LINF_140019600-T1-p1	LINF_140019600-T1-p1	serine hydroxymethyltransferase (SHMT-L)	24	56273000	54840000	54709000	55274000	454
LINF_110013300-T1-p1	LINF_110013300-T1-p1;LINF_110013400-T1-p1	40S ribosomal protein S21 - putative	1	53721000	50011000	61138000	5.49567e+07	455
LINF_180007100-T1-p1	LINF_180007100-T1-p1	Activator of Hsp90 ATPase - N-terminal/Activator of Hsp90 ATPase homolog 1-like protein - putative	14	54354000	58061000	51518000	5.46443e+07	456
LINF_280021800-T1-p1	LINF_280021800-T1-p1	hydrolase - alpha/beta fold family - putative	25	48402000	58424000	56454000	5.44267e+07	457
LINF_330024700-T1-p1	LINF_330024700-T1-p1	cyclophilin 4 - putative	10	49408000	59247000	54406000	5.43537e+07	458
LINF_360057300-T1-p1	LINF_360057300-T1-p1	paraflagellar rod component - putative	12	51063000	55551000	56101000	5.42383e+07	459
LINF_340005700-T1-p1	LINF_340005700-T1-p1	glucose-6-phosphate 1-dehydrogenase - putative	25	54349000	54228000	54088000	5.42217e+07	460
LINF_110016500-T1-p1	LINF_110016500-T1-p1	pretranslocation protein - alpha subunit - putative	9	47091000	65822000	49446000	5.41197e+07	461
LINF_150018000-T1-p1	LINF_150018000-T1-p1	succinate dehydrogenase - putative	10	57262000	55604000	48766000	5.38773e+07	462
LINF_180018300-T1-p1	LINF_180018300-T1-p1	Mitochondrial carrier protein - putative	17	48420000	53711000	59130000	5.37537e+07	463
LINF_330035400-T1-p1	LINF_330035400-T1-p1	metallo-peptidase - Clan ME - Family M16	11	56150000	51137000	53614000	5.36337e+07	464
LINF_100018900-T1-p1	LINF_100018900-T1-p1	Ras-related protein RabX1 - putative	12	56064000	53685000	50822000	5.35237e+07	465
LINF_340041900-T1-p1	LINF_340041900-T1-p1	ruvb-like 1 DNA helicase - putative	26	52971000	50969000	56359000	53433000	466
LINF_340051400-T1-p1	LINF_340051400-T1-p1;LINF_340051100-T1-p1	20s proteasome beta 7 subunit - (putative)	11	52555000	53197000	54508000	53420000	467
LINF_310038500-T1-p1	LINF_310038500-T1-p1	acetyl-CoA carboxylase - putative	70	50960000	54777000	54310000	53349000	468
LINF_290012900-T1-p1	LINF_290012900-T1-p1	U-box domain protein - putative	19	52469000	52756000	54740000	5.33217e+07	469
LINF_170020200-T1-p1	LINF_170020200-T1-p1	translation initiation factor - putative	35	52646000	52575000	54726000	5.33157e+07	470
LINF_360022800-T1-p1	LINF_360022800-T1-p1	universal minicircle sequence binding protein - putative	1	67251000	36824000	55824000	5.32997e+07	471
LINF_360048900-T1-p1	LINF_360048900-T1-p1	hslVU complex proteolytic subunit - threonine peptidase - Clan T(1) - family T1B	8	48570000	51101000	60099000	5.32567e+07	472
LINF_290027200-T1-p1	LINF_290027200-T1-p1	fumarate hydratase - putative	29	54593000	48927000	55695000	5.30717e+07	473
LINF_200007500-T1-p1	LINF_200007500-T1-p1	deoxyhypusine synthase - putative	2	83130000	35019000	40881000	53010000	474
LINF_060009000-T1-p1	LINF_060009000-T1-p1	glutamine synthetase - putative	16	49876000	54925000	54117000	5.29727e+07	475
LINF_330024300-T1-p1	LINF_330024300-T1-p1	3-ketoacyl-CoA reductase - putative	15	48896000	54680000	54941000	52839000	476
LINF_290033500-T1-p1	LINF_290033500-T1-p1	serine/threonine-protein kinase - putative	20	52773000	45407000	60149000	5.27763e+07	477
LINF_300006800-T1-p1	LINF_300006800-T1-p1	2-hydroxy-3-oxopropionate reductase - putative	14	49902000	54758000	53366000	5.26753e+07	478
LINF_230006100-T1-p1	LINF_230006100-T1-p1	GDP-mannose pyrophosphorylase	24	46008000	54068000	57458000	5.25113e+07	479
LINF_190020600-T1-p1	LINF_190020600-T1-p1	cysteine peptidase A (CPA)	9	44863000	56469000	56144000	52492000	480
LINF_040016700-T1-p1	LINF_040016700-T1-p1	fructose-1 -6-bisphosphatase	16	52808000	50122000	53749000	5.22263e+07	481
LINF_100011600-T1-p1	LINF_100011600-T1-p1	mitogen-activated protein kinase 3 - putative	11	53635000	47181000	55399000	5.20717e+07	482
LINF_040005600-T1-p1	LINF_040005600-T1-p1	hypothetical protein - conserved	23	56348000	43651000	55534000	5.18443e+07	483
LINF_320040100-T1-p1	LINF_320040100-T1-p1	glucosamine-6-phosphate isomerase - putative	13	51447000	54304000	49178000	51643000	484
LINF_090013900-T1-p1	LINF_090013900-T1-p1	oligopeptidase b	38	53809000	49463000	51386000	5.15527e+07	485
LINF_350058200-T1-p1	LINF_350058200-T1-p1	Homeobox associated leucine zipper - putative	7	59653000	39186000	55775000	51538000	486
LINF_270028100-T1-p1	LINF_270028100-T1-p1	RNA-binding protein - putative	7	49071000	48141000	57247000	5.14863e+07	487
LINF_270028900-T1-p1	LINF_270028900-T1-p1	WD domain - G-beta repeat - putative	19	59707000	53055000	41053000	5.12717e+07	488
LINF_120007600-T1-p1	LINF_120007600-T1-p1	cysteinyl-tRNA synthetase - putative	30	48179000	50781000	54769000	51243000	489
LINF_280017100-T1-p1	LINF_280017100-T1-p1	electron-transfer-flavoprotein - alpha polypeptide - putative	11	49053000	51763000	52802000	51206000	490
LINF_280024700-T1-p1	LINF_280024700-T1-p1	methylthioribulose-1-phosphate dehydratase - putative	15	49129000	52410000	51944000	51161000	491
LINF_320025500-T1-p1	LINF_320025500-T1-p1	1-acyl-sn-glycerol-3-phosphateacyltransferase-like protein - putative	10	52568000	54020000	46821000	5.11363e+07	492
LINF_260021100-T1-p1	LINF_260021100-T1-p1	proline oxidase - mitochondrial precursor-like protein	30	50130000	49140000	54068000	5.11127e+07	493
LINF_360007500-T1-p1	LINF_360007500-T1-p1	peptidyl-prolyl cis-trans isomerase - putative	5	41056000	66409000	45707000	5.10573e+07	494
LINF_320010200-T1-p1	LINF_320010200-T1-p1	Ras-related protein Rab4 - putative	1	41837000	48794000	62287000	5.09727e+07	495
LINF_310039800-T1-p1	LINF_310039800-T1-p1	phosphoglycan beta 1 -3 galactosyltransferase 5	32	49700000	49988000	53082000	5.09233e+07	496
LINF_300014200-T1-p1	LINF_300014200-T1-p1;LINF_300014100-T1-p1	surface protein amastin - putative	4	55895000	37498000	59252000	5.08817e+07	497
LINF_150022500-T1-p1	LINF_150022500-T1-p1	glutaminyl-tRNA synthetase - putative	23	50920000	52797000	48532000	5.07497e+07	498
LINF_020008700-T1-p1	LINF_020008700-T1-p1	proteasome regulatory non-ATPase subunit 6 - putative	26	50085000	51856000	50229000	5.07233e+07	499
LINF_320011600-T1-p1	LINF_320011600-T1-p1	AMMECR1 - putative	13	54886000	46908000	49880000	50558000	500
LINF_350039000-T1-p1	LINF_350039000-T1-p1	Putative death-receptor fusion protein (DUF2428) - putative	24	48885000	56334000	45921000	50380000	501
LINF_030007100-T1-p1	LINF_030007100-T1-p1	long-chain-fatty-acid-CoA ligase - putative	31	48830000	51102000	50944000	50292000	502
LINF_150010300-T1-p1	LINF_150010300-T1-p1;LINF_150010000-T1-p1;LINF_150010200-T1-p1;LINF_150009900-T1-p1;LINF_150010100-T1-p1;LINF_150010400-T1-p1	tb-292 membrane associated protein-like protein	29	54465000	48506000	47859000	5.02767e+07	503
LINF_250031400-T1-p1	LINF_250031400-T1-p1	hypothetical protein - conserved	42	51962000	47164000	51675000	50267000	504
LINF_350043800-T1-p1	LINF_350043800-T1-p1	proteasome beta 2 subunit - putative	9	48958000	48702000	53046000	5.02353e+07	505
LINF_210008800-T1-p1	LINF_210008800-T1-p1	mitochondrial processing peptidase alpha subunit - putative	18	53647000	46340000	50360000	5.01157e+07	506
LINF_090016900-T1-p1	LINF_090016900-T1-p1	hypothetical protein - conserved	23	45152000	50266000	54760000	5.00593e+07	507
LINF_240017300-T1-p1	LINF_240017300-T1-p1	translation factor sui1 - putative	2	45296000	47169000	57163000	49876000	508
LINF_190014900-T1-p1	LINF_190014900-T1-p1	peptidyl-prolyl cis-trans isomerase - macrophage infectivity potentiator precursor - putative	4	48328000	52221000	47910000	4.94863e+07	509
LINF_320008600-T1-p1	LINF_320008600-T1-p1	hypothetical protein - conserved	12	50843000	42850000	54600000	49431000	510
LINF_180022300-T1-p1	LINF_180022300-T1-p1	gamma-glutamylcysteine synthetase - putative	34	49372000	50873000	46382000	4.88757e+07	511
LINF_360007700-T1-p1	LINF_360007700-T1-p1	eukaryotic translation initiation factor 3 subunit L - putative	24	48677000	46710000	51168000	4.88517e+07	512
LINF_080015500-T1-p1	LINF_080015500-T1-p1;LINF_080015400-T1-p1;LINF_080015300-T1-p1;LINF_080015200-T1-p1;LINF_080014800-T1-p1;LINF_080015100-T1-p1;LINF_080014700-T1-p1;LINF_080014900-T1-p1;LINF_080015000-T1-p1	cysteine peptidase B (CPB)	11	48294000	43656000	54460000	4.88033e+07	513
LINF_050012600-T1-p1	LINF_050012600-T1-p1	Vta1 like - putative	8	45814000	50612000	49940000	4.87887e+07	514
LINF_140006700-T1-p1	LINF_140006700-T1-p1;LINF_360072600-T1-p1	carboxypeptidase - putative	28	45221000	52473000	48468000	4.87207e+07	515
LINF_210027000-T1-p1	LINF_210027000-T1-p1	60S ribosomal protein L32	9	53165000	38561000	54423000	4.87163e+07	516
LINF_210027500-T1-p1	LINF_210027500-T1-p1	ATP synthase F1 subunit gamma protein - putative	13	43348000	47999000	54674000	4.86737e+07	517
LINF_300006300-T1-p1	LINF_300006300-T1-p1	alkyldihydroxyacetonephosphate synthase	19	47542000	52187000	46161000	48630000	518
LINF_290017400-T1-p1	LINF_290017400-T1-p1	tryparedoxin 2 - putative	8	46012000	56412000	43374000	4.85993e+07	519
LINF_350027100-T1-p1	LINF_350027100-T1-p1;LINF_240028300-T1-p1	60S ribosomal protein L12 - putative	4	40955000	55612000	49221000	48596000	520
LINF_350026000-T1-p1	LINF_350026000-T1-p1	kinesin - putative	35	47138000	51915000	45638000	4.82303e+07	521
LINF_190005100-T1-p1	LINF_190005100-T1-p1	hypothetical protein - conserved	12	53861000	35977000	54705000	48181000	522
LINF_270010200-T1-p1	LINF_270010200-T1-p1	calpain-like cysteine peptidase - putative	218	52266000	43441000	48432000	4.80463e+07	523
LINF_350051300-T1-p1	LINF_350051300-T1-p1	hypothetical protein - conserved	47	45781000	50384000	47920000	4.80283e+07	524
LINF_360079300-T1-p1	LINF_360079300-T1-p1	serine peptidase clan SC - family S9A - putative	36	48129000	46769000	49034000	4.79773e+07	525
LINF_230008000-T1-p1	LINF_230008000-T1-p1	pteridine reductase 1	13	47150000	50365000	46356000	47957000	526
LINF_140020000-T1-p1	LINF_140020000-T1-p1	inositol-3-phosphate synthase	31	51201000	40856000	51163000	47740000	527
LINF_360052400-T1-p1	LINF_360052400-T1-p1	SET domain containing protein - putative	5	43004000	63173000	36991000	4.77227e+07	528
LINF_270033300-T1-p1	LINF_270033300-T1-p1	dynein heavy chain - putative	39	46894000	55059000	40819000	4.75907e+07	529
LINF_190006300-T1-p1	LINF_190006300-T1-p1	mitogen-activated protein kinase kinase kinase - putative	16	49229000	43955000	49384000	4.75227e+07	530
LINF_210026800-T1-p1	LINF_210026800-T1-p1	proteasome alpha 2 subunit - putative	11	47598000	41847000	51531000	46992000	531
LINF_340030100-T1-p1	LINF_340030100-T1-p1;LINF_100005600-T1-p1	ribosomal protein l35a - putative	6	45803000	58133000	36920000	46952000	532
LINF_130016000-T1-p1	LINF_130016000-T1-p1	leucyl-tRNA synthetase - putative	47	49112000	42878000	48832000	4.69407e+07	533
LINF_250022600-T1-p1	LINF_250022600-T1-p1	hypothetical protein - conserved	14	44218000	47731000	48526000	46825000	534
LINF_270015100-T1-p1	LINF_270015100-T1-p1	2-oxoglutarate dehydrogenase subunit - putative	36	47203000	46735000	46184000	4.67073e+07	535
LINF_180010900-T1-p1	LINF_180010900-T1-p1	RNA binding protein - putative	7	48245000	43591000	48277000	4.67043e+07	536
LINF_220013700-T1-p1	LINF_220013700-T1-p1	NADH-cytochrome b5 reductase - putative	11	45397000	45842000	48594000	46611000	537
LINF_350019000-T1-p1	LINF_350019000-T1-p1	threonyl-tRNA synthetase - putative	40	46168000	46509000	46315000	4.63307e+07	538
LINF_240024400-T1-p1	LINF_240024400-T1-p1	lysophospholipase - putative	10	46942000	50027000	41775000	46248000	539
LINF_160020100-T1-p1	LINF_160020100-T1-p1	hypothetical protein - conserved	13	42582000	50718000	45400000	4.62333e+07	540
LINF_280024500-T1-p1	LINF_280024500-T1-p1	replication factor A - 51kDa subunit - putative	28	47158000	43444000	47860000	46154000	541
LINF_030010000-T1-p1	LINF_030010000-T1-p1	RNA recognition motif. (a.k.a. RRM - RBD - or RNP domain) - putative	20	46941000	46318000	45165000	4.61413e+07	542
LINF_250011100-T1-p1	LINF_250011100-T1-p1	hypothetical protein - conserved	6	48736000	46548000	43117000	4.61337e+07	543
LINF_360063600-T1-p1	LINF_360063600-T1-p1	phosphoribosylpyrophosphate synthetase - putative	9	45341000	49570000	43310000	4.60737e+07	544
LINF_290008200-T1-p1	LINF_290008200-T1-p1	TPR repeat/Tetratricopeptide repeat - putative	13	53939000	38163000	46067000	4.60563e+07	545
LINF_340007000-T1-p1	LINF_340007000-T1-p1	Domain of unknown function (DUF1935) - putative	12	45518000	43845000	48658000	46007000	546
LINF_100011800-T1-p1	LINF_100011800-T1-p1	glycerol-3-phosphate dehydrogenase [NAD+] - glycosomal	18	48018000	47887000	41574000	4.58263e+07	547
LINF_190005800-T1-p1	LINF_190005800-T1-p1	fibrillarin - putative	11	43408000	48905000	45045000	45786000	548
LINF_350042600-T1-p1	LINF_350042600-T1-p1	hypothetical protein - conserved	14	51317000	39240000	46515000	4.56907e+07	549
LINF_320009700-T1-p1	LINF_320009700-T1-p1	prostaglandin f synthase - putative	13	47156000	46212000	43306000	45558000	550
LINF_290031400-T1-p1	LINF_290031400-T1-p1;LINF_160017500-T1-p1	60S ribosomal protein L39 - putative	2	48878000	43041000	44584000	45501000	551
LINF_320005000-T1-p1	LINF_320005000-T1-p1	hypothetical protein - conserved	6	47786000	48927000	39572000	4.54283e+07	552
LINF_210013800-T1-p1	LINF_210013800-T1-p1	Domain of unknown function (DUF3819)/CCR4-Not complex component - Not1 - putative	77	44865000	48372000	42730000	4.53223e+07	553
LINF_310017600-T1-p1	LINF_310017600-T1-p1	amidohydrolase - putative	22	48604000	43440000	43547000	45197000	554
LINF_330024500-T1-p1	LINF_330024500-T1-p1	peptidase m20/m25/m40 family-like protein	18	45716000	45314000	44416000	4.51487e+07	555
LINF_340050900-T1-p1	LINF_340050900-T1-p1	coatomer alpha subunit - putative	41	41923000	44324000	47755000	4.46673e+07	556
LINF_290032800-T1-p1	LINF_290032800-T1-p1	vacuolar protein sorting-associated protein 4	12	49237000	40740000	43614000	4.45303e+07	557
LINF_320016600-T1-p1	LINF_320016600-T1-p1	HECT-domain (ubiquitin-transferase) - putative	36	42835000	46404000	44160000	4.44663e+07	558
LINF_100015600-T1-p1	LINF_100015600-T1-p1	FKBP-type peptidyl-prolyl cis-trans isomerase - putative	5	43617000	48563000	39727000	43969000	559
LINF_310028200-T1-p1	LINF_310028200-T1-p1;LINF_310026700-T1-p1	peptidase m20/m25/m40 family-like protein	15	40397000	46733000	44708000	43946000	560
LINF_310033900-T1-p1	LINF_310033900-T1-p1	ubiquinol-cytochrome-c reductase-like protein	5	45040000	36627000	50156000	43941000	561
LINF_300022600-T1-p1	LINF_300022600-T1-p1	Intraflagellar transport complex B protein 46 C terminal - putative	5	47709000	45038000	39056000	4.39343e+07	562
LINF_280029900-T1-p1	LINF_280029900-T1-p1	eukaryotic translation initiation factor - putative	23	45582000	38695000	47433000	4.39033e+07	563
LINF_160015100-T1-p1	LINF_160015100-T1-p1	sucrose-phosphate synthase-like protein	20	43348000	43584000	44718000	4.38833e+07	564
LINF_190009300-T1-p1	LINF_190009300-T1-p1	nucleosome assembly protein - putative	11	45576000	46939000	38662000	4.37257e+07	565
LINF_360008400-T1-p1	LINF_360008400-T1-p1	20S proteasome subunit	6	43946000	44166000	42775000	43629000	566
LINF_170015800-T1-p1	LINF_170015800-T1-p1	META domain containing protein	12	40786000	39965000	50046000	43599000	567
LINF_350006500-T1-p1	LINF_350006500-T1-p1	hypothetical protein - conserved	8	41007000	44973000	44549000	4.35097e+07	568
LINF_270027100-T1-p1	LINF_270027100-T1-p1	GMP-PDE - delta subunit - putative	9	41976000	35277000	53049000	43434000	569
LINF_030014700-T1-p1	LINF_030014700-T1-p1	hypothetical protein - conserved	4	45180000	40769000	44108000	4.33523e+07	570
LINF_250012000-T1-p1	LINF_250012000-T1-p1	epsin - putative	15	45111000	36023000	48651000	4.32617e+07	571
LINF_170009100-T1-p1	LINF_170009100-T1-p1;REV__LINF_330016600-T1-p1	histone H2A - putative	5	41371000	41770000	46203000	4.31147e+07	572
LINF_330042900-T1-p1	LINF_330042900-T1-p1	delta-12 fatty acid desaturase	7	46297000	25606000	57436000	43113000	573
LINF_310024900-T1-p1	LINF_310024900-T1-p1	nucleosome assembly protein-like protein	18	46729000	34662000	47780000	43057000	574
LINF_350022400-T1-p1	LINF_350022400-T1-p1	dynein-associated roadblock protein-like protein	3	47361000	40543000	41243000	43049000	575
LINF_330031700-T1-p1	LINF_330031700-T1-p1	hypothetical protein - conserved	8	45981000	32144000	50912000	4.30123e+07	576
LINF_180017600-T1-p1	LINF_180017600-T1-p1	prolyl-tRNA synthetase - putative	35	42716000	41048000	44968000	4.29107e+07	577
LINF_120005200-T1-p1	LINF_120005200-T1-p1	proteasome beta-1 subunit - putative	6	44123000	39508000	44646000	42759000	578
LINF_200019300-T1-p1	LINF_200019300-T1-p1	paralyzed flagella protein 16	21	41256000	42729000	44005000	4.26633e+07	579
LINF_340044900-T1-p1	LINF_340044900-T1-p1	serine palmitoyltransferase-like protein	13	42839000	45411000	39466000	42572000	580
LINF_290016900-T1-p1	LINF_290016900-T1-p1	Ankyrin repeats (3 copies)/Ankyrin repeats (many copies)/Ankyrin repeat - putative	10	36456000	42749000	48329000	4.25113e+07	581
LINF_320043300-T1-p1	LINF_320043300-T1-p1	hypothetical protein - conserved	6	43129000	46361000	37920000	42470000	582
LINF_260029100-T1-p1	LINF_260029100-T1-p1	SLY1 protein - putative	13	38939000	46015000	42151000	4.23683e+07	583
LINF_280023600-T1-p1	LINF_280023600-T1-p1	proteasome regulatory non-ATP-ase subunit 2 - putative	28	41662000	40710000	44732000	42368000	584
LINF_190007400-T1-p1	LINF_190007400-T1-p1	C-terminal motor kinesin - putative	30	43007000	41342000	42340000	4.22297e+07	585
LINF_340033000-T1-p1	LINF_340033000-T1-p1	RNA recognition motif. (a.k.a. RRM - RBD - or RNP domain)/RNA recognition motif (a.k.a. RRM - RBD - or RNP domain) - putative | tr	8	45864000	39142000	41671000	4.22257e+07	586
LINF_250027800-T1-p1	LINF_250027800-T1-p1	hypothetical protein - conserved	4	43562000	45977000	36771000	4.21033e+07	587
LINF_150022600-T1-p1	LINF_150022600-T1-p1	proliferative cell nuclear antigen (PCNA) - putative	12	42066000	39266000	44944000	42092000	588
LINF_060012200-T1-p1	LINF_060012200-T1-p1	hypothetical protein - conserved	12	46654000	35847000	43647000	4.20493e+07	590
LINF_290030800-T1-p1	LINF_290030800-T1-p1	enoyl-CoA hydratase/isomerase-like protein	15	43454000	41363000	41222000	42013000	591
LINF_210027800-T1-p1	LINF_210027800-T1-p1;LINF_210027700-T1-p1	vacuolar ATP synthase - putative	1	50196000	29126000	46591000	41971000	592
LINF_350016200-T1-p1	LINF_350016200-T1-p1	oligosaccharyl transferase subunit - putative	17	39796000	40508000	43886000	4.13967e+07	593
LINF_230005800-T1-p1	LINF_230005800-T1-p1	hypothetical protein - conserved	25	45164000	34083000	44701000	41316000	594
LINF_280028400-T1-p1	LINF_280028400-T1-p1	Mitochondrial import receptor subunit ATOM69 - putative	32	43290000	36694000	43869000	4.12843e+07	595
LINF_040014600-T1-p1	LINF_040014600-T1-p1	adenylate kinase - putative	6	45122000	33058000	45649000	4.12763e+07	596
LINF_320036500-T1-p1	LINF_320036500-T1-p1	tubulin-tyrosine ligase-like protein	2	45834000	34060000	43774000	4.12227e+07	597
LINF_190006700-T1-p1	LINF_190006700-T1-p1	Multiprotein-bridging factor 1 - putative	6	45208000	34839000	43548000	4.11983e+07	598
LINF_270005300-T1-p1	LINF_270005300-T1-p1	CAAX prenyl protease 1 - putative	11	39856000	42134000	41600000	4.11967e+07	599
LINF_350020400-T1-p1	LINF_350020400-T1-p1	rieske iron-sulfur protein - mitochondrial precursor - putative	16	42007000	45342000	36150000	4.11663e+07	600
LINF_350048500-T1-p1	LINF_350048500-T1-p1	hypothetical protein - conserved	6	33908000	51864000	37112000	4.09613e+07	601
LINF_170008100-T1-p1	LINF_170008100-T1-p1	Tetratricopeptide repeat - putative	18	40992000	38109000	43743000	40948000	602
LINF_110017200-T1-p1	LINF_110017200-T1-p1	sterol 14-alpha-demethylase - putative	23	41699000	39809000	41114000	40874000	603
LINF_350054900-T1-p1	LINF_350054900-T1-p1	hypothetical protein - conserved	7	45985000	30119000	46499000	4.08677e+07	604
LINF_140021300-T1-p1	LINF_140021300-T1-p1	glutathione-S-transferase/glutaredoxin - putative	16	41853000	40943000	39558000	4.07847e+07	605
LINF_090017900-T1-p1	LINF_090017900-T1-p1	MSP (Major sperm protein) domain containing protein - putative	9	41355000	37693000	43110000	4.07193e+07	606
LINF_280007300-T1-p1	LINF_280007300-T1-p1	glycerol-3-phosphate dehydrogenase (FAD-dependent) - mitochondrial	28	42547000	37121000	42191000	4.06197e+07	607
LINF_340025500-T1-p1	LINF_340025500-T1-p1	ATP-dependent RNA helicase - putative	7	38077000	50389000	33379000	40615000	608
LINF_270006800-T1-p1	LINF_270006800-T1-p1	proteasome alpha 7 subunit - putative	9	42073000	34122000	45349000	4.05147e+07	609
LINF_300008800-T1-p1	LINF_300008800-T1-p1	phosphatase 2C - putative	12	40674000	38686000	42067000	4.04757e+07	610
LINF_210020600-T1-p1	LINF_210020600-T1-p1	adenylate kinase - putative	15	41422000	41131000	38381000	4.03113e+07	611
LINF_360029200-T1-p1	LINF_360029200-T1-p1	Plasma-membrane choline transporter - putative	2	42694000	35637000	42095000	40142000	612
LINF_140012500-T1-p1	LINF_140012500-T1-p1;LINF_140012400-T1-p1	fatty acid elongase - putative	6	47434000	24511000	48356000	4.01003e+07	613
LINF_320005100-T1-p1	LINF_320005100-T1-p1	nuclear segregation protein - putative	20	42514000	32358000	45261000	4.00443e+07	614
LINF_220019700-T1-p1	LINF_220019700-T1-p1	farnesyl pyrophosphate synthase	14	42753000	34553000	42609000	3.99717e+07	615
LINF_330036700-T1-p1	LINF_330036700-T1-p1	translation initiation factor IF-2 - putative	25	38478000	42619000	38608000	3.99017e+07	616
LINF_150008100-T1-p1	LINF_150008100-T1-p1	ribonucleoprotein p18 - mitochondrial precursor - putative	2	47552000	27326000	44767000	3.98817e+07	617
LINF_300036000-T1-p1	LINF_300036000-T1-p1	eukaryotic translation initiation factor 3 subunit 7-like protein	24	40709000	38243000	40632000	3.98613e+07	618
LINF_010009800-T1-p1	LINF_010009800-T1-p1	long-chain-fatty-acid-CoA ligase - putative	29	40418000	39996000	38619000	3.96777e+07	619
LINF_300012600-T1-p1	LINF_300012600-T1-p1	heat shock protein grpe	2	37062000	41920000	39857000	39613000	620
LINF_300023000-T1-p1	LINF_300023000-T1-p1	Flagellar-associated PapD-like/Zeta toxin - putative	42	33554000	48796000	35911000	3.94203e+07	621
LINF_090014600-T1-p1	LINF_090014600-T1-p1	Uncharacterised protein family (UPF0160) - putative	7	38166000	38381000	40732000	39093000	622
LINF_340026100-T1-p1	LINF_340026100-T1-p1	hypothetical protein - conserved	9	36697000	47336000	33135000	39056000	623
LINF_210012700-T1-p1	LINF_210012700-T1-p1	ATP-binding cassette protein subfamily E - member 1 - putative	17	37293000	44769000	35053000	3.90383e+07	624
LINF_340052200-T1-p1	LINF_340052200-T1-p1	1 -2-Dihydroxy-3-keto-5-methylthiopentene dioxygenase - putative	12	35510000	40719000	40856000	3.90283e+07	625
LINF_330042200-T1-p1	LINF_330042200-T1-p1	beta prime cop protein - putative	26	35795000	37297000	43973000	3.90217e+07	626
LINF_280028900-T1-p1	LINF_280028900-T1-p1	glycoprotein 96-92 - putative	12	44283000	28234000	44436000	3.89843e+07	627
LINF_270015600-T1-p1	LINF_270015600-T1-p1	isovaleryl-coA dehydrogenase - putative	13	43220000	35029000	38691000	38980000	628
LINF_210011000-T1-p1	LINF_210011000-T1-p1	la RNA binding protein - putative	15	40114000	35809000	40872000	3.89317e+07	629
LINF_330019100-T1-p1	LINF_330019100-T1-p1	pumilio protein 6 - putative	16	40454000	31907000	44390000	38917000	630
LINF_330042000-T1-p1	LINF_330042000-T1-p1	small nuclear ribonucleoprotein SmD2	6	36794000	44187000	35645000	3.88753e+07	631
LINF_320027600-T1-p1	LINF_320027600-T1-p1	hypothetical protein - conserved	30	39157000	38328000	38932000	3.88057e+07	632
LINF_140020100-T1-p1	LINF_140020100-T1-p1	tyrosyl-tRNA synthetase - putative	19	38110000	38085000	39987000	3.87273e+07	633
LINF_300037100-T1-p1	LINF_300037100-T1-p1	Translocon-associated protein beta (TRAPB)/Domain of unknown function DUF11/CARDB - putative	8	35848000	39533000	40545000	38642000	634
LINF_350028800-T1-p1	LINF_350028800-T1-p1	aminopeptidase P - putative	13	35530000	38642000	41377000	3.85163e+07	635
LINF_330022100-T1-p1	LINF_330022100-T1-p1	mitogen activated protein kinase - putative	15	39010000	38797000	37646000	3.84843e+07	636
LINF_130022300-T1-p1	LINF_130022300-T1-p1	pyrroline-5-carboxylate reductase	10	35795000	39875000	39608000	38426000	637
LINF_340026500-T1-p1	LINF_340026500-T1-p1	hypothetical protein - conserved	3	35715000	39886000	39288000	3.82963e+07	638
LINF_350056200-T1-p1	LINF_350056200-T1-p1	hypothetical protein - conserved	5	37485000	30941000	46419000	3.82817e+07	639
LINF_330032400-T1-p1	LINF_330032400-T1-p1	succinyl-coA:3-ketoacid-coenzyme A transferase - mitochondrial precursor - putative	23	37063000	37696000	39952000	38237000	640
LINF_340010100-T1-p1	LINF_340010100-T1-p1	importin beta-1 subunit - putative	18	34960000	46863000	32863000	3.82287e+07	641
LINF_310005400-T1-p1	LINF_310005400-T1-p1	cyclophilin 5 - putative	10	40782000	39243000	34456000	3.81603e+07	642
LINF_280031800-T1-p1	LINF_280031800-T1-p1;LINF_280028800-T1-p1	ribosomal protein S29 - putative	4	38490000	32802000	43156000	3.81493e+07	643
LINF_130013700-T1-p1	LINF_130013700-T1-p1	hypothetical protein - conserved	12	38585000	36642000	39070000	38099000	644
LINF_270018900-T1-p1	LINF_270018900-T1-p1	WD domain - G-beta repeat - putative	15	38187000	37826000	38248000	38087000	645
LINF_300014300-T1-p1	LINF_300014300-T1-p1	amastin-like surface protein-like protein	3	37585000	34591000	42082000	38086000	646
LINF_320014300-T1-p1	LINF_320014300-T1-p1	phenylalanyl-tRNA synthetase alpha chain - putative	11	35889000	37406000	40687000	37994000	647
LINF_010011600-T1-p1	LINF_010011600-T1-p1	metallo-peptidase - Clan ME - Family M16	13	38528000	41250000	33800000	3.78593e+07	648
LINF_250016700-T1-p1	LINF_250016700-T1-p1	hypothetical protein - conserved	13	41064000	30337000	42000000	3.78003e+07	649
LINF_340045900-T1-p1	LINF_340045900-T1-p1	TPR repeat - putative	7	35623000	33096000	44461000	3.77267e+07	650
LINF_270032100-T1-p1	LINF_270032100-T1-p1	TPR-repeat protein - putative	21	38226000	35303000	39600000	3.77097e+07	651
LINF_160010400-T1-p1	LINF_160010400-T1-p1	dihydroorotate dehydrogenase (fumarate)	10	34762000	43025000	35299000	3.76953e+07	652
LINF_180012600-T1-p1	LINF_180012600-T1-p1	Elongation factor Tu - mitochondrial - putative	24	39529000	31262000	42288000	37693000	653
LINF_190006200-T1-p1	LINF_190006200-T1-p1	Associated kinase of Tb14-3-3 - putative	17	38302000	35016000	39712000	3.76767e+07	654
LINF_340005600-T1-p1	LINF_340005600-T1-p1	ascorbate peroxidase	20	38923000	38130000	35644000	3.75657e+07	655
LINF_040009200-T1-p1	LINF_040009200-T1-p1	Tetratricopeptide repeat - putative	9	39271000	31569000	41453000	37431000	656
LINF_290035900-T1-p1	LINF_290035900-T1-p1	ribonuclease inhibitor-like protein	3	33523000	74790000	3969500	37427500	657
LINF_300038100-T1-p1	LINF_300038100-T1-p1	glutamyl-tRNA synthetase - putative	35	37909000	34195000	40096000	37400000	658
LINF_270023100-T1-p1	LINF_270023100-T1-p1	eukaryotic translation initiation factor eIF-4E - putative	7	41336000	33631000	36695000	3.72207e+07	659
LINF_250013300-T1-p1	LINF_250013300-T1-p1	protein phosphatase - putative	16	43996000	28419000	38693000	37036000	660
LINF_360034500-T1-p1	LINF_360034500-T1-p1	Calcineurin-like phosphoesterase superfamily domain containing protein - putative	4	33437000	38613000	38873000	3.69743e+07	661
LINF_330028000-T1-p1	LINF_330028000-T1-p1	phosphoribosylpyrophosphate synthetase - putative	12	33161000	47041000	30654000	36952000	662
LINF_220010200-T1-p1	LINF_220010200-T1-p1	Putative tRNA binding domain containing protein - putative	18	38816000	37310000	34623000	3.69163e+07	663
LINF_300042600-T1-p1	LINF_300042600-T1-p1	hypothetical protein - conserved	30	37995000	30648000	42101000	3.69147e+07	664
LINF_340032100-T1-p1	LINF_340032100-T1-p1	ruvB-like DNA helicase - putative	25	35529000	35043000	40024000	3.68653e+07	665
LINF_140015400-T1-p1	LINF_140015400-T1-p1	tc40 antigen-like	39	37124000	35507000	37430000	36687000	666
LINF_300037500-T1-p1	LINF_300037500-T1-p1	3-hydroxy-3-methylglutaryl-CoA reductase	20	35152000	38654000	35940000	36582000	667
LINF_310029500-T1-p1	LINF_310029500-T1-p1	Fungal tRNA ligase phosphodiesterase domain containing protein - putative	20	35770000	37948000	35957000	3.65583e+07	668
LINF_360029600-T1-p1	LINF_360029600-T1-p1	developmentally regulated GTP-binding protein 1 - putative	14	35848000	35020000	38780000	3.65493e+07	669
LINF_280025600-T1-p1	LINF_280025600-T1-p1	Double-stranded DNA-binding domain containing protein - putative	5	43185000	31100000	35108000	3.64643e+07	670
LINF_350029100-T1-p1	LINF_350029100-T1-p1	hypothetical protein - conserved	9	35346000	60322000	13548000	3.64053e+07	671
LINF_320023000-T1-p1	LINF_320023000-T1-p1	coatomer subunit epsilon	18	35616000	41879000	31691000	3.63953e+07	672
LINF_320026000-T1-p1	LINF_320026000-T1-p1	hypothetical protein - conserved	6	40698000	31863000	36603000	36388000	673
LINF_130006500-T1-p1	LINF_130006500-T1-p1	protein kinase A regulatory subunit	20	35687000	32942000	40333000	3.63207e+07	674
LINF_360052600-T1-p1	LINF_360052600-T1-p1	predicted C2 domain protein	14	38899000	35066000	34939000	3.63013e+07	675
LINF_360044000-T1-p1	LINF_360044000-T1-p1	Domain of unknown function (DUF3846)/TPR repeat - putative	14	38876000	32372000	37606000	3.62847e+07	676
LINF_300041500-T1-p1	LINF_300041500-T1-p1	Zinc finger CCCH domain-containing protein	5	34376000	38316000	35831000	3.61743e+07	677
LINF_200010700-T1-p1	LINF_200010700-T1-p1	conserved protein - unknown function	3	33923000	37664000	36375000	3.59873e+07	678
LINF_340012100-T1-p1	LINF_340012100-T1-p1	proteasome regulatory non-ATPase subunit 11 - putative	16	33962000	40883000	32989000	3.59447e+07	679
LINF_210016600-T1-p1	LINF_210016600-T1-p1	Aminoacyl-tRNA editing domain containing protein - putative	14	36441000	35406000	35733000	35860000	680
LINF_310031300-T1-p1	LINF_310031300-T1-p1	3-nucleotidase/nuclease precursor - putative	8	42358000	29265000	35946000	3.58563e+07	681
LINF_200007400-T1-p1	LINF_200007400-T1-p1	transmembrane protein - putative	9	34340000	37104000	36051000	3.58317e+07	682
LINF_070018200-T1-p1	LINF_070018200-T1-p1	peptide methionine sulfoxide reductase-like	8	34458000	36269000	36484000	35737000	683
LINF_330023500-T1-p1	LINF_330023500-T1-p1	PRA1 family protein - putative	3	36129000	37114000	33853000	3.56987e+07	684
LINF_320007400-T1-p1	LINF_320007400-T1-p1	dynein light chain - flagellar outer arm - putative	5	43535000	37586000	25962000	3.56943e+07	685
LINF_060016800-T1-p1	LINF_060016800-T1-p1	hypothetical protein - conserved	13	33305000	36940000	36269000	3.55047e+07	686
LINF_060018800-T1-p1	LINF_060018800-T1-p1	pteridine transporter (truncated) - putative	10	30019000	36570000	39649000	3.54127e+07	687
LINF_250015700-T1-p1	LINF_250015700-T1-p1	dynein heavy chain - putative	117	33677000	39338000	33158000	35391000	688
LINF_300041700-T1-p1	LINF_300041700-T1-p1	40S ribosomal protein S14	3	53986000	29775000	22365000	3.53753e+07	689
LINF_140006200-T1-p1	LINF_140006200-T1-p1	inosine-guanine nucleoside hydrolase - putative	11	32966000	39444000	33543000	3.53177e+07	690
LINF_320005500-T1-p1	LINF_320005500-T1-p1	protein transport protein SEC13 - putative	14	31880000	31661000	41186000	34909000	691
LINF_350045600-T1-p1	LINF_350045600-T1-p1;LINF_350045100-T1-p1	protein kinase A catalytic subunit isoform 1	7	31424000	37216000	35960000	3.48667e+07	692
LINF_160010300-T1-p1	LINF_160010300-T1-p1	hypothetical protein - conserved	20	36804000	34901000	32723000	3.48093e+07	693
LINF_070007900-T1-p1	LINF_070007900-T1-p1	acetylornithine deacetylase-like protein	20	34841000	33095000	36451000	3.47957e+07	694
LINF_130016900-T1-p1	LINF_130016900-T1-p1	adenylosuccinate synthetase - putative	28	35683000	32606000	35959000	3.47493e+07	695
LINF_140008100-T1-p1	LINF_140008100-T1-p1	proteasome alpha 3 subunit - putative	11	35767000	31506000	36904000	3.47257e+07	696
LINF_300039500-T1-p1	LINF_300039500-T1-p1	PAS-domain containing phosphoglycerate kinase - putative	26	35647000	35814000	32527000	3.46627e+07	697
LINF_280033500-T1-p1	LINF_280033500-T1-p1	Coatomer subunit gamma	35	34050000	35532000	34377000	34653000	698
LINF_260013100-T1-p1	LINF_260013100-T1-p1	type II (glutathione peroxidase-like) tryparedoxin peroxidase	2	34029000	36947000	32938000	34638000	699
LINF_340021200-T1-p1	LINF_340021200-T1-p1;LINF_340021300-T1-p1;LINF_340021100-T1-p1	d-isomer specific 2-hydroxyacid dehydrogenase- protein	22	36321000	30212000	37176000	3.45697e+07	700
LINF_270024100-T1-p1	LINF_270024100-T1-p1	eRF1 domain 1/eRF1 domain 2/eRF1 domain 3 - putative	18	33868000	31433000	38378000	3.45597e+07	701
LINF_350035900-T1-p1	LINF_350035900-T1-p1	ubiquitin-activating enzyme E1 - putative	43	34361000	33321000	35938000	34540000	702
LINF_260020500-T1-p1	LINF_260020500-T1-p1	trifunctional enzyme alpha subunit - mitochondrial precursor-like protein	35	34010000	35301000	34293000	3.45347e+07	703
LINF_070005600-T1-p1	LINF_070005600-T1-p1	cytochrome c1 - heme protein - mitochondrial - putative	12	31667000	31561000	40246000	3.44913e+07	704
LINF_280018700-T1-p1	LINF_280018700-T1-p1	hypothetical protein - conserved	3	28194000	27075000	47660000	3.43097e+07	705
LINF_180014200-T1-p1	LINF_180014200-T1-p1	rab7 GTP binding protein - putative	5	31592000	33180000	37913000	3.42283e+07	706
LINF_340019600-T1-p1	LINF_340019600-T1-p1	PTP1-interacting protein - 39 kDa - putative	14	35592000	31453000	35298000	3.41143e+07	707
LINF_330042500-T1-p1	LINF_330042500-T1-p1;LINF_130022200-T1-p1	60S ribosomal protein L44 - putative	3	49869000	429632	51573000	3.39572e+07	708
LINF_330015600-T1-p1	LINF_330015600-T1-p1	2 -4-dienoyl-coa reductase fadh1 - putative	33	31075000	35652000	34932000	3.38863e+07	709
LINF_280032200-T1-p1	LINF_280032200-T1-p1	eukaryotic translation initiation factor 4E - putative	15	36352000	28652000	36594000	33866000	710
LINF_290030700-T1-p1	LINF_290030700-T1-p1	ubiquitin hydrolase - putative	14	36522000	31864000	33167000	33851000	711
LINF_350058500-T1-p1	LINF_350058500-T1-p1	Lsm12 protein - putative	4	32480000	35235000	33432000	3.37157e+07	712
LINF_170014900-T1-p1	LINF_170014900-T1-p1	ysine decarboxylase-like protein	11	34847000	34478000	31582000	3.36357e+07	713
LINF_030010800-T1-p1	LINF_030010800-T1-p1	arginine N-methyltransferase - putative	12	31843000	35539000	33336000	3.35727e+07	714
LINF_330008900-T1-p1	LINF_330008900-T1-p1	ATP-binding cassette sub-family F member 1 - putative	17	31295000	42371000	26813000	33493000	715
LINF_340028800-T1-p1	LINF_340028800-T1-p1	asparaginyl-tRNA synthetase - putative	30	33748000	33404000	33050000	3.34007e+07	716
LINF_290015200-T1-p1	LINF_290015200-T1-p1	5-histidylcysteine sulfoxide synthase - putative	31	33500000	33536000	33035000	33357000	717
LINF_360043300-T1-p1	LINF_360043300-T1-p1	2-oxoglutarate dehydrogenase subunit - putative	44	33465000	30670000	35774000	33303000	718
LINF_120009300-T1-p1	LINF_120009300-T1-p1	Eukaryotic protein of unknown function (DUF866) - putative	4	37133000	27331000	35436000	33300000	719
LINF_080009800-T1-p1	LINF_080009800-T1-p1	small ubiquitin protein - putative	4	33724000	29155000	36945000	3.32747e+07	720
LINF_350039800-T1-p1	LINF_350039800-T1-p1	Replication factor A protein 3 - putative	5	30512000	28958000	40055000	33175000	721
LINF_310017700-T1-p1	LINF_310017700-T1-p1	amidohydrolase - putative	6	41981000	33436000	24017000	3.31447e+07	722
LINF_060006500-T1-p1	LINF_060006500-T1-p1	20S proteasome beta 6 subunit - putative	7	35515000	27969000	35195000	32893000	723
LINF_330034900-T1-p1	LINF_330034900-T1-p1	metallo-peptidase - Clan MF - Family M17	18	32878000	32687000	33104000	3.28897e+07	724
LINF_100020500-T1-p1	LINF_100020500-T1-p1	Protein of unknown function (DUF1861) - putative	7	32395000	35467000	30284000	3.27153e+07	726
LINF_230025500-T1-p1	LINF_230025500-T1-p1	alanine racemase - putative	12	32526000	33000000	32430000	32652000	727
LINF_180016700-T1-p1	LINF_180016700-T1-p1	Ras-related protein Rab5A - putative	12	29364000	32663000	35849000	3.26253e+07	728
LINF_270017000-T1-p1	LINF_270017000-T1-p1	cysteine desulfurase - putative	18	34570000	32548000	30642000	3.25867e+07	729
LINF_150005300-T1-p1	LINF_150005300-T1-p1	Possible lysine decarboxylase - putative	16	35911000	27740000	33742000	3.24643e+07	730
LINF_210014100-T1-p1	LINF_210014100-T1-p1	Temperature dependent protein affecting M2 dsRNA replication - putative	26	30640000	33217000	33253000	32370000	731
LINF_200018700-T1-p1	LINF_200018700-T1-p1	coatomer beta subunit - putative	23	29857000	32727000	34230000	3.22713e+07	732
LINF_030010200-T1-p1	LINF_030010200-T1-p1	26S protease regulatory subunit - putative	12	31622000	35029000	30135000	32262000	733
LINF_300012900-T1-p1	LINF_300012900-T1-p1	4-methyl-5(beta-hydroxyethyl)-thiazole monophosphate synthesis protein - putative	10	26295000	42125000	28142000	3.21873e+07	734
LINF_290031100-T1-p1	LINF_290031100-T1-p1	Nucleosome assembly protein (NAP) - putative	8	30183000	29572000	36743000	32166000	735
LINF_230013100-T1-p1	LINF_230013100-T1-p1	ubiquitin-activating enzyme E1 - putative	35	32906000	30830000	32566000	3.21007e+07	736
LINF_350052900-T1-p1	LINF_350052900-T1-p1	Hsp70 protein - putative	22	29836000	31496000	34695000	32009000	737
LINF_200021200-T1-p1	LINF_200021200-T1-p1	ribosome biogenesis protein - putative	9	32789000	35264000	27886000	3.19797e+07	738
LINF_320037900-T1-p1	LINF_320037900-T1-p1	protein phosphatase 2A catalytic subunit - putative	17	31526000	31328000	33042000	3.19653e+07	739
LINF_320043900-T1-p1	LINF_320043900-T1-p1;LINF_320043800-T1-p1;LINF_320043700-T1-p1	3-hydroxyisobutyryl-coenzyme a hydrolase-like protein	19	32953000	32118000	30773000	31948000	740
LINF_320035300-T1-p1	LINF_320035300-T1-p1	proteasome regulatory non-ATP-ase subunit - putative	20	31326000	30483000	33778000	3.18623e+07	741
LINF_350056500-T1-p1	LINF_350056500-T1-p1;LINF_330028300-T1-p1	Ribosomal protein L37e - putative	1	38245000	25715000	31613000	3.18577e+07	742
LINF_280007000-T1-p1	LINF_280007000-T1-p1	histone H2B variant	4	29706000	31632000	34164000	31834000	743
LINF_270021300-T1-p1	LINF_270021300-T1-p1;LINF_270021100-T1-p1;LINF_270020900-T1-p1	Snf7 - putative	7	33913000	30176000	31361000	3.18167e+07	744
LINF_320036100-T1-p1	LINF_320036100-T1-p1	SNAP protein - putative	10	33433000	26581000	35431000	31815000	745
LINF_300038800-T1-p1	LINF_300038800-T1-p1	MORN repeat-containing protein 1	26	31534000	26454000	37117000	3.17017e+07	746
LINF_070015200-T1-p1	LINF_070015200-T1-p1	serine/threonine kinase - putative	7	32290000	31643000	31046000	3.16597e+07	747
LINF_270033830-T1-p1	LINF_270033830-T1-p1;LINF_020012400-T1-p1	hypothetical protein	45	31412000	29074000	34484000	3.16567e+07	748
LINF_330024600-T1-p1	LINF_330024600-T1-p1	hypothetical protein - conserved	17	30674000	34603000	29668000	3.16483e+07	749
LINF_320039600-T1-p1	LINF_320039600-T1-p1	50S ribosome-binding GTPase/Miro-like protein/Ras family - putative	11	33017000	32323000	29379000	31573000	750
LINF_300018100-T1-p1	LINF_300018100-T1-p1	pyridoxal kinase - putative	17	33456000	30329000	30909000	3.15647e+07	751
LINF_180019600-T1-p1	LINF_180019600-T1-p1	pumilio protein 2 - putative	11	29739000	33025000	31202000	31322000	752
LINF_240027800-T1-p1	LINF_240027800-T1-p1	Glycerophosphoryl diester phosphodiesterase family - putative	16	32067000	29842000	32004000	3.13043e+07	753
LINF_300033800-T1-p1	LINF_300033800-T1-p1	hypothetical protein - conserved	4	32168000	32319000	29282000	3.12563e+07	754
LINF_360082300-T1-p1	LINF_360082300-T1-p1	cytochrome oxidase subunit IX - putative	3	35107000	32381000	26250000	31246000	755
LINF_270012500-T1-p1	LINF_270012500-T1-p1	hypothetical protein - conserved	11	31170000	30212000	31944000	3.11087e+07	756
LINF_300038700-T1-p1	LINF_300038700-T1-p1	UV excision repair RAD23-like protein	5	32433000	29998000	30849000	3.10933e+07	757
LINF_350054400-T1-p1	LINF_350054400-T1-p1	TPR repeat/Tetratricopeptide repeat/Uncharacterised protein family (UPF0121) - putative	12	29824000	32813000	30137000	3.09247e+07	758
LINF_200011000-T1-p1	LINF_200011000-T1-p1	cytidine triphosphate synthase - putative	17	31332000	29333000	32107000	30924000	759
LINF_310023800-T1-p1	LINF_310023800-T1-p1;LINF_310023700-T1-p1;LINF_310023600-T1-p1	3-ketoacyl-CoA thiolase-like protein - putative	22	29824000	31513000	31397000	3.09113e+07	760
LINF_260005200-T1-p1	LINF_260005200-T1-p1	methylmalonyl-coa epimerase-like protein	7	31711000	31123000	29710000	30848000	761
LINF_220006800-T1-p1	LINF_220006800-T1-p1	hypothetical protein - conserved	13	31491000	27624000	33354000	30823000	762
LINF_100007100-T1-p1	LINF_100007100-T1-p1	Mitogen-activated protein kinase 10 - putative	21	29968000	30218000	32213000	3.07997e+07	763
LINF_330029300-T1-p1	LINF_330029300-T1-p1	hypothetical protein - conserved	15	27676000	33712000	30929000	3.07723e+07	764
LINF_270023800-T1-p1	LINF_270023800-T1-p1	hypothetical protein - conserved	19	31178000	33474000	27612000	3.07547e+07	765
LINF_350044300-T1-p1	LINF_350044300-T1-p1	calmodulin-like protein	4	34335000	25909000	31957000	3.07337e+07	766
LINF_220013600-T1-p1	LINF_220013600-T1-p1	NADH-cytochrome b5 reductase - putative	21	33264000	29491000	29440000	3.07317e+07	767
LINF_150019300-T1-p1	LINF_150019300-T1-p1	Cyclic nucleotide-binding domain containing protein - putative	37	29814000	32025000	30354000	30731000	768
LINF_180007200-T1-p1	LINF_180007200-T1-p1	RNA-binding protein 29 - putative	9	30178000	28926000	32916000	3.06733e+07	769
LINF_270018800-T1-p1	LINF_270018800-T1-p1;LINF_270018300-T1-p1	putative histone H1	2	33454000	21421000	36932000	3.06023e+07	770
LINF_250025200-T1-p1	LINF_250025200-T1-p1	Not1 N-terminal domain - CCR4-Not complex component/NOT2 / NOT3 / NOT5 family - putative	20	35672000	25962000	30049000	30561000	771
LINF_320021600-T1-p1	LINF_320021600-T1-p1	phosphomannose isomerase	18	30772000	28190000	32702000	3.05547e+07	772
LINF_330018200-T1-p1	LINF_330018200-T1-p1	hypothetical protein - conserved	8	29521000	27885000	34202000	30536000	773
LINF_240028500-T1-p1	LINF_240028500-T1-p1	hypothetical protein - conserved	7	27350000	30890000	32773000	3.03377e+07	774
LINF_250029100-T1-p1	LINF_250029100-T1-p1	Parkin co-regulated protein - putative	16	31849000	31544000	27322000	3.02383e+07	775
LINF_050015100-T1-p1	LINF_050015100-T1-p1	3-mercaptopyruvate sulfurtransferase	9	34609000	24874000	31167000	3.02167e+07	776
LINF_330037400-T1-p1	LINF_330037400-T1-p1	transcription elongation factor-like protein	19	34046000	27441000	28797000	3.00947e+07	777
LINF_350058900-T1-p1	LINF_350058900-T1-p1	isopentenyl-diphosphate delta-isomerase (type II) - putative	16	29046000	32014000	29175000	3.00783e+07	778
LINF_350007000-T1-p1	LINF_350007000-T1-p1	NLI interacting factor-like phosphatase - putative	11	33407000	28971000	27855000	3.00777e+07	779
LINF_290018600-T1-p1	LINF_290018600-T1-p1	Heat shock protein 100 kDa	49	28815000	31308000	29866000	2.99963e+07	780
LINF_320045900-T1-p1	LINF_320045900-T1-p1	Unconventional myosin	38	28819000	27300000	33585000	2.99013e+07	781
LINF_250012700-T1-p1	LINF_250012700-T1-p1	hypothetical protein - conserved	10	37227000	22083000	30096000	29802000	782
LINF_090014500-T1-p1	LINF_090014500-T1-p1	DEAD/DEAH box helicase-like protein	2	416880	86566000	2182100	29721660	783
LINF_340048400-T1-p1	LINF_340048400-T1-p1	ubiquitin hydrolase - putative	33	28016000	30249000	30836000	2.97003e+07	784
LINF_300041600-T1-p1	LINF_300041600-T1-p1	serine/threonine-protein kinase - putative	13	33034000	30941000	25103000	2.96927e+07	785
LINF_210021600-T1-p1	LINF_210021600-T1-p1	ATP synthase - putative	23	29032000	29744000	30247000	2.96743e+07	786
LINF_070015900-T1-p1	LINF_070015900-T1-p1	hypothetical protein - conserved	9	31077000	19510000	38389000	2.96587e+07	787
LINF_110017700-T1-p1	LINF_110017700-T1-p1	eukaryotic release factor 3 - putative	24	32417000	24988000	31446000	29617000	788
LINF_180011900-T1-p1	LINF_180011900-T1-p1	HEAT repeats/HEAT repeat - putative	20	30117000	31372000	27259000	2.95827e+07	789
LINF_350059000-T1-p1	LINF_350059000-T1-p1	Dynein heavy chain and region D6 of dynein motor/Ankyrin repeats (3 copies)/Ankyrin repeat - putative	12	28657000	31040000	28437000	29378000	790
LINF_320005800-T1-p1	LINF_320005800-T1-p1	N-myristoyl transferase - putative	20	29472000	29960000	28613000	2.93483e+07	791
LINF_190005900-T1-p1	LINF_190005900-T1-p1	Clathrin light chain - putative	4	31755000	27220000	29057000	29344000	792
LINF_260020600-T1-p1	LINF_260020600-T1-p1	SNF2 family N-terminal domain/DEAD/DEAH box helicase/Ring finger domain/Zinc finger - C3HC4 type (RING finger)/Helicase conserved	6	29145000	36363000	22349000	2.92857e+07	793
LINF_300034400-T1-p1	LINF_300034400-T1-p1	aldehyde dehydrogenase - putative	19	27192000	31819000	28116000	2.90423e+07	794
LINF_280018600-T1-p1	LINF_280018600-T1-p1	phenylalanine-4-hydroxylase	10	33976000	33815000	19215000	29002000	795
LINF_290035800-T1-p1	LINF_290035800-T1-p1	inosine-adenosine-guanosine-nucleosidehydrolase - putative	10	28674000	27243000	30803000	2.89067e+07	796
LINF_310016600-T1-p1	LINF_310016600-T1-p1	hypothetical protein - conserved	11	34203000	18297000	33602000	2.87007e+07	797
LINF_200019700-T1-p1	LINF_200019700-T1-p1	hypothetical protein - conserved	8	32416000	24889000	28504000	28603000	798
LINF_240023900-T1-p1	LINF_240023900-T1-p1	RNA recognition motif. (a.k.a. RRM - RBD - or RNP domain)/RNA recognition motif (a.k.a. RRM - RBD - or RNP domain) - putative | tr	5	28647000	29273000	27763000	28561000	799
LINF_360028400-T1-p1	LINF_360028400-T1-p1	DEAD box RNA helicase - putative	23	30064000	29123000	26490000	28559000	800
LINF_120007200-T1-p1	LINF_120007200-T1-p1	proteasome regulatory ATPase subunittcc1l8.3 - putative	16	28679000	25536000	31384000	28533000	801
LINF_030011900-T1-p1	LINF_030011900-T1-p1	DEAD/DEAH box helicase/Type III restriction enzyme - res subunit - putative	68	27517000	28923000	29053000	2.84977e+07	802
LINF_100009300-T1-p1	LINF_100009300-T1-p1;LINF_100009400-T1-p1;LINF_100009100-T1-p1;LINF_100009200-T1-p1	pteridine transporter (truncated) - putative	13	27106000	25234000	33053000	2.84643e+07	803
LINF_090011500-T1-p1	LINF_090011500-T1-p1	Histidine phosphatase superfamily (branch 1) - putative	8	28090000	27264000	29999000	28451000	804
LINF_290006600-T1-p1	LINF_290006600-T1-p1	Protein phosphatase inhibitor 2 (IPP-2) - putative	6	28698000	18126000	38371000	2.83983e+07	805
LINF_090021700-T1-p1	LINF_090021700-T1-p1	Bacterial trigger factor protein (TF) C-terminus - putative	6	34907000	18639000	31501000	28349000	806
LINF_300033500-T1-p1	LINF_300033500-T1-p1	chaperonin HSP60/CNP60 - putative	18	27169000	28352000	28997000	2.81727e+07	807
LINF_300024800-T1-p1	LINF_300024800-T1-p1	cyclosome subunit-like protein	8	24129000	37408000	22949000	28162000	808
LINF_360014600-T1-p1	LINF_360014600-T1-p1	eukaryotic translation initiation factor 6 (eIF-6) - putative	9	30319000	24648000	29187000	2.80513e+07	809
LINF_350017100-T1-p1	LINF_350017100-T1-p1	short chain dehydrogenase - putative	16	27899000	30115000	26091000	28035000	810
LINF_360053500-T1-p1	LINF_360053500-T1-p1;LINF_360041100-T1-p1	60S ribosomal protein L22 - putative	4	25356000	27876000	30622000	2.79513e+07	811
LINF_360022300-T1-p1	LINF_360022300-T1-p1	proteasome subunit alpha type-1 - putative	12	29962000	22086000	31804000	2.79507e+07	812
LINF_280009700-T1-p1	LINF_280009700-T1-p1	Saccharopine dehydrogenase - putative	13	27616000	29094000	27142000	2.79507e+07	813
LINF_260027800-T1-p1	LINF_260027800-T1-p1	kynureninase - putative	20	27720000	29973000	25988000	2.78937e+07	814
LINF_030006700-T1-p1	LINF_030006700-T1-p1	U2 splicing auxiliary factor - putative	5	27788000	26273000	29495000	27852000	815
LINF_310005700-T1-p1	LINF_310005700-T1-p1	hypothetical protein - conserved	7	33799000	22613000	27105000	27839000	816
LINF_240010000-T1-p1	LINF_240010000-T1-p1	DNAJ domain protein - putative	13	26513000	29874000	26944000	27777000	817
LINF_240014600-T1-p1	LINF_240014600-T1-p1	Archaic Translocase of outer membrane 14 kDa subunit - putative	6	25577000	25221000	32113000	27637000	818
LINF_340052400-T1-p1	LINF_340052400-T1-p1	hypothetical protein - conserved	26	27494000	27691000	27629000	2.76047e+07	819
LINF_360005800-T1-p1	LINF_360005800-T1-p1	leucine carboxyl methyltransferase - putative	13	28415000	26344000	28015000	2.75913e+07	820
LINF_050016700-T1-p1	LINF_050016700-T1-p1	V-type proton ATPase subunit D - putative	17	27040000	26373000	29247000	2.75533e+07	821
LINF_350022200-T1-p1	LINF_350022200-T1-p1	casein kinase II - putative	7	25383000	25322000	31703000	2.74693e+07	822
LINF_060017500-T1-p1	LINF_060017500-T1-p1	nuclear transport factor 2 protein - putative	6	29086000	27869000	25113000	27356000	823
LINF_270027600-T1-p1	LINF_270027600-T1-p1	ribonucleoside-diphosphate reductase small chain - putative	15	28418000	24634000	28900000	2.73173e+07	824
LINF_180007800-T1-p1	LINF_180007800-T1-p1	hypothetical protein - conserved	27	26008000	26928000	28875000	2.72703e+07	825
LINF_340047900-T1-p1	LINF_340047900-T1-p1	hypothetical protein - conserved	3	18994000	20789000	41985000	27256000	826
LINF_140015800-T1-p1	LINF_140015800-T1-p1	hypothetical protein - conserved	19	28778000	25183000	27741000	27234000	827
LINF_340044100-T1-p1	LINF_340044100-T1-p1	transmembrane/endomembrane-like protein	13	26866000	24058000	30520000	27148000	828
LINF_040011900-T1-p1	LINF_040011900-T1-p1	ubiquitin-conjugating enzyme E2 - putative	11	24303000	26665000	30318000	2.70953e+07	829
LINF_060014900-T1-p1	LINF_060014900-T1-p1	hypothetical protein - conserved	9	26586000	25720000	28634000	26980000	830
LINF_160017600-T1-p1	LINF_160017600-T1-p1	coatomer delta subunit-like protein	12	26647000	25787000	28406000	2.69467e+07	831
LINF_250021900-T1-p1	LINF_250021900-T1-p1	mitochondrial RNA binding complex 1 subunit - putative	18	27652000	26334000	26813000	26933000	832
LINF_160016900-T1-p1	LINF_160016900-T1-p1	tyrosyl or methionyl-tRNA synthetase-like protein	11	28538000	23884000	28225000	2.68823e+07	833
LINF_360052900-T1-p1	LINF_360052900-T1-p1	19S proteasome regulatory subunit	14	26687000	26062000	27616000	2.67883e+07	834
LINF_070017000-T1-p1	LINF_070017000-T1-p1	cation-transporting ATPase - putative	15	25249000	26748000	28249000	2.67487e+07	835
LINF_300040000-T1-p1	LINF_300040000-T1-p1	protein mkt1 - putative	20	27391000	27251000	25498000	2.67133e+07	836
LINF_280032300-T1-p1	LINF_280032300-T1-p1	acyl-CoA dehydrogenase - putative	27	28074000	26505000	25466000	2.66817e+07	837
LINF_200014700-T1-p1	LINF_200014700-T1-p1	1 -2-Dihydroxy-3-keto-5-methylthiopentene dioxygenase - putative	19	28670000	25860000	25355000	2.66283e+07	838
LINF_320034000-T1-p1	LINF_320034000-T1-p1	hypothetical protein - conserved	6	21789000	33462000	24609000	26620000	839
LINF_220011100-T1-p1	LINF_220011100-T1-p1	proteasome regulatory ATPase subunit 1 - putative	20	26582000	24965000	28135000	2.65607e+07	840
LINF_290005100-T1-p1	LINF_290005100-T1-p1	transcription factor-like protein	38	24751000	26992000	27934000	26559000	841
LINF_280018200-T1-p1	LINF_280018200-T1-p1	p450 reductase - putative	16	24059000	28361000	27253000	2.65577e+07	842
LINF_080013300-T1-p1	LINF_080013300-T1-p1;lncRNA.LINF_310025700.LinJ.31:910778-908755.ORF_2;lncRNA.LINF_310025600.LinJ.31:903881-901967.ORF_3;lncRNA.LINF_310025300.LinJ.31:886707-884303.ORF_5	mitochondrial DNA polymerase beta	15	26886000	24758000	28027000	26557000	843
LINF_100014600-T1-p1	LINF_100014600-T1-p1	hypothetical protein - conserved	2	27812000	25811000	25997000	26540000	844
LINF_350053100-T1-p1	LINF_350053100-T1-p1	glyceraldehyde-3-phosphate dehydrogenase-like protein	5	25002000	25884000	28589000	2.64917e+07	845
LINF_130015900-T1-p1	LINF_130015900-T1-p1	proteasome regulatory ATPase subunit 2 - putative	19	27460000	22803000	28884000	2.63823e+07	846
LINF_350026700-T1-p1	LINF_350026700-T1-p1	short chain dehydrogenase - putative	19	26530000	25512000	26999000	26347000	847
LINF_230017800-T1-p1	LINF_230017800-T1-p1	cytosolic leucyl aminopeptidase	15	24835000	31536000	22473000	2.62813e+07	848
LINF_330040700-T1-p1	LINF_330040700-T1-p1	Flagellar Member 8	11	27830000	23124000	27635000	2.61963e+07	849
LINF_360028600-T1-p1	LINF_360028600-T1-p1	transmembrane emp24 domain-containing protein	5	31070000	27243000	20248000	26187000	850
LINF_310016800-T1-p1	LINF_310016800-T1-p1	biotin/lipoate protein ligase-like protein	15	27580000	24480000	26448000	2.61693e+07	851
LINF_140006400-T1-p1	LINF_140006400-T1-p1	60S ribosomal protein - putative	6	28065000	26244000	24104000	2.61377e+07	852
LINF_310006400-T1-p1	LINF_310006400-T1-p1	ubiquitin carboxyl-terminal hydrolase - putative	14	23199000	31352000	23759000	2.61033e+07	853
LINF_270022100-T1-p1	LINF_270022100-T1-p1	Domain of unknown function (DUF543) - putative	5	25741000	30770000	21720000	26077000	854
LINF_140010200-T1-p1	LINF_140010200-T1-p1;LINF_140010300-T1-p1	Amastin surface glycoprotein - putative	3	26000000	26326000	25856000	2.60607e+07	855
LINF_350035100-T1-p1	LINF_350035100-T1-p1	chaperone protein DNAj - putative	18	28485000	23190000	26488000	2.60543e+07	856
LINF_250012600-T1-p1	LINF_250012600-T1-p1	Thioredoxin/Thioredoxin-like - putative	10	25932000	26345000	25541000	2.59393e+07	857
LINF_090020700-T1-p1	LINF_090020700-T1-p1	paraflagellar rod component - putative	12	29419000	20820000	27535000	2.59247e+07	858
LINF_350011600-T1-p1	LINF_350011600-T1-p1	vacuolar ATP synthase subunit d - putative	9	24515000	25747000	27393000	25885000	859
LINF_030007500-T1-p1	LINF_030007500-T1-p1	Apolipoprotein A1/A4/E domain containing protein - putative	5	28898000	17329000	31183000	2.58033e+07	860
LINF_200022000-T1-p1	LINF_200022000-T1-p1	amidohydrolase - putative	15	25952000	28012000	23445000	25803000	861
LINF_240006200-T1-p1	LINF_240006200-T1-p1	glycosomal membrane like protein	6	19993000	26547000	30797000	25779000	862
LINF_160019600-T1-p1	LINF_160019600-T1-p1	ADP-ribosylation factor-like - putative	5	25054000	33957000	18246000	2.57523e+07	863
LINF_330023200-T1-p1	LINF_330023200-T1-p1	hypothetical protein - conserved	12	27039000	24819000	25154000	2.56707e+07	864
LINF_210022900-T1-p1	LINF_210022900-T1-p1	2-oxoisovalerate dehydrogenase alpha subunit - putative	14	24576000	24251000	28145000	2.56573e+07	865
LINF_210027400-T1-p1	LINF_210027400-T1-p1	centromere/microtubule binding protein cbf5 - putative	20	25745000	23650000	27354000	25583000	866
LINF_300036200-T1-p1	LINF_300036200-T1-p1	kinesin - putative	17	25761000	24181000	26629000	2.55237e+07	867
LINF_350025900-T1-p1	LINF_350025900-T1-p1	calcium motive p-type ATPase - putative	25	26192000	22149000	28228000	25523000	868
LINF_260016000-T1-p1	LINF_260016000-T1-p1	hypothetical protein - conserved	2	21798000	28218000	26367000	25461000	869
LINF_120007900-T1-p1	LINF_120007900-T1-p1	ornithine decarboxylase - putative	15	25480000	25259000	25526000	2.54217e+07	870
LINF_090023000-T1-p1	LINF_090023000-T1-p1	hypothetical protein - conserved	3	24687000	27727000	23668000	2.53607e+07	871
LINF_130015500-T1-p1	LINF_130015500-T1-p1	Dpy-30 motif containing protein - putative	12	24906000	27450000	23691000	25349000	872
LINF_360005200-T1-p1	LINF_360005200-T1-p1	hypothetical protein - conserved	8	25201000	21241000	29392000	25278000	873
LINF_080009200-T1-p1	LINF_080009200-T1-p1	WD domain - G-beta repeat - putative	36	26297000	25048000	24386000	2.52437e+07	874
LINF_240009200-T1-p1	LINF_240009200-T1-p1;LINF_240009300-T1-p1;LINF_220014600-T1-p1	Protein of unknown function (DUF3184) - putative	22	25922000	26422000	23301000	25215000	875
LINF_090019000-T1-p1	LINF_090019000-T1-p1	hypothetical protein - conserved	9	26549000	24074000	24998000	25207000	876
LINF_100010000-T1-p1	LINF_100010000-T1-p1	4F5 protein family/Zinc-binding - putative	3	29534000	22119000	23888000	2.51803e+07	877
LINF_360053800-T1-p1	LINF_360053800-T1-p1	mitochondrial intermediate peptidase - putative	20	25310000	25447000	24782000	2.51797e+07	878
LINF_320020300-T1-p1	LINF_320020300-T1-p1	phosphatidylinositol 3-related kinase - putative	7	19827000	34005000	21549000	25127000	879
LINF_280026400-T1-p1	LINF_280026400-T1-p1	Leucine Rich Repeat/Leucine Rich repeat - putative	20	24473000	24866000	25920000	2.50863e+07	880
LINF_120014700-T1-p1	LINF_120014700-T1-p1	surface antigen protein 2 - putative	6	25016000	20146000	29916000	25026000	881
LINF_080014100-T1-p1	LINF_080014100-T1-p1	Dpy-30 motif containing protein - putative	14	26736000	23914000	24335000	24995000	882
LINF_250010600-T1-p1	LINF_250010600-T1-p1	Scd6-like Sm domain containing protein - putative	11	24827000	25220000	24677000	24908000	883
LINF_120011800-T1-p1	LINF_120011800-T1-p1	protein phosphatase with EF-Hand domains (PPEF)	21	23129000	28694000	22832000	24885000	884
LINF_350045300-T1-p1	LINF_350045300-T1-p1	4E-interacting protein - putative	6	27708000	20153000	26763000	2.48747e+07	885
LINF_340027200-T1-p1	LINF_340027200-T1-p1	Thioredoxin/Thioredoxin-like domain/Thioredoxin-like - putative	15	25942000	22397000	26253000	24864000	886
LINF_330034700-T1-p1	LINF_330034700-T1-p1	isocitrate dehydrogenase - putative	12	23511000	26944000	24064000	2.48397e+07	887
LINF_240006100-T1-p1	LINF_240006100-T1-p1	ankyrin/TPR repeat protein	11	22310000	24071000	27946000	2.47757e+07	888
LINF_350029500-T1-p1	LINF_350029500-T1-p1	Autophagy-related protein 24	11	25331000	23397000	25408000	24712000	889
LINF_190020400-T1-p1	LINF_190020400-T1-p1	Tetratricopeptide repeat - putative	15	26111000	21278000	26601000	2.46633e+07	890
LINF_320044900-T1-p1	LINF_320044900-T1-p1	kinetoplast-associated protein p18-2 - putative	3	24614000	27150000	22118000	2.46273e+07	891
LINF_310031000-T1-p1	LINF_310031000-T1-p1	ADP-ribosylation factor - putative	9	22614000	22864000	28398000	2.46253e+07	892
LINF_280028000-T1-p1	LINF_280028000-T1-p1	Dynein light chain LC6 - flagellar outer arm - putative	3	22802000	22614000	28137000	2.45177e+07	893
LINF_360019100-T1-p1	LINF_360019100-T1-p1	N-acetyltransferase subunit Nat1 - putative	29	25209000	23926000	24318000	2.44843e+07	894
LINF_290014300-T1-p1	LINF_290014300-T1-p1	hypothetical protein - conserved	21	26865000	23228000	23322000	2.44717e+07	895
LINF_340010500-T1-p1	LINF_340010500-T1-p1;LINF_340010400-T1-p1	Amastin surface glycoprotein - putative	2	309925	33491000	39569000	2.44566e+07	896
LINF_310009200-T1-p1	LINF_310009200-T1-p1	calpain-like cysteine peptidase - putative	20	23875000	24186000	24885000	2.43153e+07	897
LINF_350019700-T1-p1	LINF_350019700-T1-p1	hypothetical protein - conserved	14	22561000	23544000	26835000	2.43133e+07	898
LINF_330021300-T1-p1	LINF_330021300-T1-p1	glutamine aminotransferase - putative	14	23520000	22083000	27300000	24301000	899
LINF_340028300-T1-p1	LINF_340028300-T1-p1	twinfilin - putative	15	24648000	23921000	24332000	2.43003e+07	900
LINF_110011600-T1-p1	LINF_110011600-T1-p1	3-methylcrotonoyl-CoA carboxylase beta subunit - putative	23	24279000	23595000	24981000	24285000	901
LINF_230013200-T1-p1	LINF_230013200-T1-p1	kinesin - putative	23	23581000	26102000	23162000	2.42817e+07	902
LINF_300042400-T1-p1	LINF_300042400-T1-p1	V-type ATPase - C subunit - putative	1	22628000	24457000	25540000	2.42083e+07	903
LINF_270021500-T1-p1	LINF_270021500-T1-p1	proteasome regulatory non-ATP-ase subunit 3 - putative	8	25095000	22919000	24606000	2.42067e+07	904
LINF_340046300-T1-p1	LINF_340046300-T1-p1	small nuclear ribonucleoprotein - putative	4	20316000	31946000	20254000	24172000	905
LINF_350014400-T1-p1	LINF_350014400-T1-p1	aldose 1-epimerase - putative	9	20835000	25088000	26429000	2.41173e+07	906
LINF_330026000-T1-p1	LINF_330026000-T1-p1	macrophage migration inhibitory factor-like protein	5	27932000	18284000	26063000	24093000	907
LINF_360060800-T1-p1	LINF_360060800-T1-p1	hypothetical protein - conserved	11	22306000	25457000	24296000	2.40197e+07	908
LINF_060011800-T1-p1	LINF_060011800-T1-p1	Putative Phosphatase/Protein of unknown function DUF89 - putative	23	22010000	28016000	21928000	2.39847e+07	909
LINF_300011300-T1-p1	LINF_300011300-T1-p1	ribosome biogenesis regulatory protein (RRS1) - putative	6	26281000	21704000	23789000	2.39247e+07	910
LINF_350023200-T1-p1	LINF_350023200-T1-p1	hypothetical protein - conserved	31	22074000	24861000	24819000	23918000	911
LINF_230018500-T1-p1	LINF_230018500-T1-p1	hypothetical protein - conserved	8	26389000	9976800	35320000	2.38953e+07	912
LINF_250010500-T1-p1	LINF_250010500-T1-p1	ABC transporter - mitochondrial - putative	21	23647000	24293000	23706000	23882000	913
LINF_150017400-T1-p1	LINF_150017400-T1-p1	calmodulin-like protein	11	29172000	18614000	23838000	2.38747e+07	914
LINF_160006500-T1-p1	LINF_160006500-T1-p1	eukaryotic translation initiation factor 1A - putative	6	22020000	17999000	31385000	2.38013e+07	915
LINF_230023400-T1-p1	LINF_230023400-T1-p1	2Fe-2S iron-sulfur cluster binding domain containing protein - putative	10	24192000	21003000	26208000	23801000	916
LINF_270018600-T1-p1	LINF_270018600-T1-p1	hypothetical protein - conserved	26	24874000	21718000	24792000	2.37947e+07	917
LINF_360070100-T1-p1	LINF_360070100-T1-p1	OTU-like cysteine protease - putative	5	23611000	21178000	26511000	2.37667e+07	918
LINF_230020500-T1-p1	LINF_230020500-T1-p1	coronin - putative	15	24281000	23301000	23627000	2.37363e+07	919
LINF_360061000-T1-p1	LINF_360061000-T1-p1	kinesin-like protein - putative	24	22719000	22891000	25524000	2.37113e+07	920
LINF_320024200-T1-p1	LINF_320024200-T1-p1	rab11B GTPase - putative	6	23413000	23034000	24561000	2.36693e+07	921
LINF_280026000-T1-p1	LINF_280026000-T1-p1	X-pro - dipeptidyl-peptidase -serine peptidase - Clan SC - family S15 - putative	19	22518000	23933000	24455000	2.36353e+07	922
LINF_220022300-T1-p1	LINF_220022300-T1-p1	ser/thr protein phosphatase - putative	15	22763000	25073000	23016000	2.36173e+07	923
LINF_060008000-T1-p1	LINF_060008000-T1-p1	hypothetical protein - conserved	7	25012000	21300000	24492000	2.36013e+07	924
LINF_090013400-T1-p1	LINF_090013400-T1-p1	cleavage and polyadenylation specificity factor 30 kDa subunit - putative	5	25910000	21036000	23796000	2.35807e+07	925
LINF_350038500-T1-p1	LINF_350038500-T1-p1	hypothetical protein - conserved	13	22324000	24236000	23962000	2.35073e+07	926
LINF_360008800-T1-p1	LINF_360008800-T1-p1	Integral membrane protein DUF106 - putative	6	22271000	25095000	22971000	2.34457e+07	927
LINF_120009100-T1-p1	LINF_120009100-T1-p1	3-nucleotidase/nuclease - putative	6	23123000	24748000	22388000	2.34197e+07	928
LINF_110017600-T1-p1	LINF_110017600-T1-p1	protein transport protein SEC31 - putative	22	23855000	21987000	24397000	23413000	929
LINF_240023700-T1-p1	LINF_240023700-T1-p1	inhibitor of cysteine peptidase	9	23459000	23415000	23295000	2.33897e+07	930
LINF_340026400-T1-p1	LINF_340026400-T1-p1	ubiquitin-like protein	4	22977000	22304000	24646000	23309000	931
LINF_070009700-T1-p1	LINF_070009700-T1-p1	3-hydroxyacyl-ACP dehydratase - putative	9	22834000	21248000	25667000	2.32497e+07	932
LINF_360046700-T1-p1	LINF_360046700-T1-p1	MORN repeat - putative	8	23700000	21378000	24521000	2.31997e+07	933
LINF_220014900-T1-p1	LINF_220014900-T1-p1	hypothetical protein - conserved	3	24378000	36432000	8776100	2.31954e+07	934
LINF_090011100-T1-p1	LINF_090011100-T1-p1	hypothetical protein - conserved	26	24575000	21685000	23250000	23170000	935
LINF_330034200-T1-p1	LINF_330034200-T1-p1	Radial spokehead-like protein - putative	9	20863000	32889000	15714000	2.31553e+07	936
LINF_350046300-T1-p1	LINF_350046300-T1-p1	Regulatory subunit of type II PKA R-subunit - putative	9	24195000	22439000	22775000	2.31363e+07	937
LINF_140012200-T1-p1	LINF_140012200-T1-p1	fatty acid elongase - putative	7	23520000	23212000	22577000	23103000	938
LINF_290008100-T1-p1	LINF_290008100-T1-p1	hypothetical protein	1	23913000	22012000	23350000	2.30917e+07	939
LINF_290021100-T1-p1	LINF_290021100-T1-p1	hypothetical protein - conserved	16	24790000	20180000	24210000	23060000	940
LINF_360011800-T1-p1	LINF_360011800-T1-p1	Mitochondrial ATP synthase epsilon chain - putative	2	22303000	18230000	28638000	23057000	941
LINF_020008100-T1-p1	LINF_020008100-T1-p1	Soluble NSF attachment protein - SNAP - putative	19	22173000	26999000	19996000	23056000	942
LINF_120015600-T1-p1	LINF_120015600-T1-p1	n-ethylmaleimide reductase-like protein	16	22267000	22702000	24044000	2.30043e+07	943
LINF_220022700-T1-p1	LINF_220022700-T1-p1	hypothetical protein - conserved	2	22691000	19677000	26529000	2.29657e+07	944
LINF_280039500-T1-p1	LINF_280039500-T1-p1	glucosamine 6-phosphate n-acetyltransferase - putative	4	24953000	20888000	23007000	2.29493e+07	945
LINF_340011700-T1-p1	LINF_340011700-T1-p1	enoyl-[acyl-carrier-protein] reductase - putative	10	23596000	22415000	22772000	2.29277e+07	946
LINF_310005000-T1-p1	LINF_310005000-T1-p1	5-methyltetrahydropteroyltriglutamate-homocysteine S-methyltransferase	20	22258000	25209000	21199000	2.28887e+07	947
LINF_170016800-T1-p1	LINF_170016800-T1-p1	Mak10 subunit - NatC N(alpha)-terminal acetyltransferase - putative	28	21790000	24322000	22423000	22845000	948
LINF_310011000-T1-p1	LINF_310011000-T1-p1	mevalonate kinase - putative	7	23934000	19845000	24683000	2.28207e+07	949
LINF_260028200-T1-p1	LINF_260028200-T1-p1	nitrilase - putative	12	22315000	24559000	21587000	2.28203e+07	950
LINF_360075000-T1-p1	LINF_360075000-T1-p1	GTPase activating protein - putative	7	23527000	19055000	25850000	2.28107e+07	951
LINF_310039600-T1-p1	LINF_310039600-T1-p1;LINF_310039500-T1-p1	iron/zinc transporter protein-like protein	5	16234000	31707000	20305000	2.27487e+07	952
LINF_130020200-T1-p1	LINF_130020200-T1-p1	Ran-binding protein 1 - putative	7	24908000	22176000	20994000	2.26927e+07	953
LINF_110007000-T1-p1	LINF_110007000-T1-p1	acidocalcisomal pyrophosphatase	22	24309000	21726000	22030000	2.26883e+07	954
LINF_300039600-T1-p1	LINF_300039600-T1-p1	CAS/CSE/importin domain protein - putative	31	22751000	23635000	21562000	2.26493e+07	955
LINF_250014000-T1-p1	LINF_250014000-T1-p1	Prefoldin subunit - putative	6	23849000	14763000	28888000	22500000	956
LINF_240009000-T1-p1	LINF_240009000-T1-p1	ubiquitin carboxyl-terminal hydrolase - putative	10	23236000	21705000	22554000	2.24983e+07	957
LINF_350045500-T1-p1	LINF_350045500-T1-p1	MAP kinase kinase-like protein	30	22125000	22993000	22369000	2.24957e+07	958
LINF_180015200-T1-p1	LINF_180015200-T1-p1	UDP-glucose pyrophosphorylase	19	21563000	21886000	24036000	22495000	959
LINF_360070400-T1-p1	LINF_360070400-T1-p1	hypothetical protein - conserved	7	22940000	24991000	19217000	2.23827e+07	960
LINF_290014900-T1-p1	LINF_290014900-T1-p1	LETM1 and EF-hand domain-containing protein 1 - putative	21	21922000	21564000	23634000	2.23733e+07	961
LINF_210018400-T1-p1	LINF_210018400-T1-p1	cell division protein kinase 2	12	21725000	22724000	22512000	2.23203e+07	962
LINF_320020800-T1-p1	LINF_320020800-T1-p1	Metalloprotease M41 FtsH - putative	19	23186000	20333000	23435000	22318000	963
LINF_230009200-T1-p1	LINF_230009200-T1-p1	ATP-binding cassette protein subfamily G - member 5	15	22561000	22857000	21433000	2.22837e+07	964
LINF_150020800-T1-p1	LINF_150020800-T1-p1	ubiquitin hydrolase - putative	37	22321000	23152000	21240000	2.22377e+07	965
LINF_290005500-T1-p1	LINF_290005500-T1-p1	tryptophanyl-tRNA synthetase - putative	13	21937000	23657000	21030000	22208000	966
LINF_310007000-T1-p1	LINF_310007000-T1-p1	nucleolar protein - putative	10	22187000	22641000	21770000	2.21993e+07	967
LINF_240008500-T1-p1	LINF_240008500-T1-p1	aspartate aminotransferase - putative	18	24424000	19392000	22480000	2.20987e+07	968
LINF_230005100-T1-p1	LINF_230005100-T1-p1	hypothetical protein - conserved	20	21975000	21427000	22733000	22045000	969
LINF_210014700-T1-p1	LINF_210014700-T1-p1	metallo-peptidase - Clan MG - Family M24	9	23920000	18565000	23460000	2.19817e+07	970
LINF_240015500-T1-p1	LINF_240015500-T1-p1	dynein light chain - putative	7	22726000	19354000	23768000	2.19493e+07	971
LINF_300031100-T1-p1	LINF_300031100-T1-p1	formate--tetrahydrofolate ligase	22	21368000	23180000	20961000	2.18363e+07	972
LINF_320039000-T1-p1	LINF_320039000-T1-p1	Flagellar Member 7	23	23791000	23035000	18638000	2.18213e+07	973
LINF_320025300-T1-p1	LINF_320025300-T1-p1	heat shock protein-like protein - putative	13	22735000	22458000	20174000	21789000	974
LINF_190021900-T1-p1	LINF_190021900-T1-p1	WD domain - G-beta repeat - putative	13	22025000	21448000	21681000	21718000	975
LINF_070006000-T1-p1	LINF_070006000-T1-p1	metallo-peptidase - Clan ME - Family M16C	25	21028000	23264000	20815000	2.17023e+07	976
LINF_060007900-T1-p1	LINF_060007900-T1-p1	5-3 exoribonuclease A - putative	41	21186000	22702000	21163000	2.16837e+07	977
LINF_350018200-T1-p1	LINF_350018200-T1-p1	Thioredoxin - putative	14	24069000	19508000	21381000	2.16527e+07	978
LINF_350052700-T1-p1	LINF_350052700-T1-p1	PACRGB	11	21868000	23020000	19978000	21622000	979
LINF_270014900-T1-p1	LINF_270014900-T1-p1	Repeat of unknown function (DUF1126)/EF-hand domain pair - putative	28	21016000	21272000	22515000	21601000	980
LINF_020009700-T1-p1	LINF_020009700-T1-p1	voltage-dependent anion-selective channel - putative	13	18178000	22590000	24034000	2.16007e+07	981
LINF_070008100-T1-p1	LINF_070008100-T1-p1	Uncharacterised protein family (UPF0172) - putative	10	20203000	26420000	18063000	21562000	982
LINF_100018400-T1-p1	LINF_100018400-T1-p1	PAB1-binding protein - putative	15	21070000	19386000	24058000	2.15047e+07	983
LINF_230005500-T1-p1	LINF_230005500-T1-p1	cyclophilin 11 - putative	10	20911000	21875000	21719000	2.15017e+07	984
[truncated: 4,255 more rows]

## Sheet: RD196-03
PROTEIN INFORMATION				PROTEIN SIGNAL INTENSITY
[truncated: 7,702 more rows]
