# Supplementary material for: Novel insights into the Leishmania infantum transcriptome diversity of protein-coding and non-coding sequences in both stages of parasite development using Nanopore direct RNA sequencing
Source: Research Square preprint supplement (doi:10.21203/rs.3.rs-6214733/v1), 2025-04-01
Supplement: Supplementary file 2 [file 2cebdfdc59290914bb73af19.xlsx]

## Sheet: Table S1- ONT DRS summary
					P1	P2	A1	A2
	Sequenced	# reads			6924673	6304455	6791066	5251284
		Total bases (nt)			5395291436	4979040741	6156996798	4795098901
		Coverage (X) a			164.474	151.785	187.695	146.178
		Median read length (nt)			666	673	753	761
		Median read quality			10.1	10.2	10.1	10.1
	Basecalled	# reads			6814583	6203139	6667671	5161959
		Median read length (nt)			670	676	759	766
		Median read quality			10.7	10.8	10.7	10.7
	Filrered	# reads			6813287	6202325	6666603	5161219
		Median read length (nt)			670	676	759	766
		Median read quality			10.7	10.8	10.7	10.7
	Aligned	# of reads			6604760	6024113	6402659	4981118
		Primary alignment			6602769	6022563	6400153	4979826
		Secondary alignment			1280232	1239698	1078033	833446
		Supplementary alignment			1986	1543	2476	1266
		Total bases (nt)			4969792578	4586181147	5667819145	4429828092
		Coverage (X)			152	140	173	135
		Median read length (nt)			684	689	781	785
		Median read quality			10.7	10.8	10.7	10.7
		Median % identity			90.3	90.5	90.2	90.2
		% reads aligned b			95.3801	95.5533	94.2806	94.8552
	Poly(A) tail (>=20 As)	# reads			4530839	4244590	4407812	3403132
		Total bases (nt)			3448359748	3265471946	3946650267	3066188320
		Coverage (X)			105.123	99.5472	120.313	93.4721
		Median read length (nt)			701	706	804	811
		Median read quality			10.8	10.8	10.8	10.7
		% reads poly(A) b			65.4304	67.3268	64.906	64.8057
	Poly(A) tail and SL reads (FL reads)	# reads			773496	761908	868119	660056
		Total bases (nt)			644334921	647692825	833293278	643339714
		Coverage (X)			19.6424	19.7448	25.4028	19.6121
		Median read length (nt)			780	790	879	897
		Median read quality			11.1	11.2	11.1	11
		% Full length (FL) reads b			11.1701	12.0852	12.7833	12.5694
		Monocistrons	#		587685	578312	588564	453993
			% c		75.9778	75.9031	67.7976	68.781
		Polycistrons	#		1365	1431	3865	2906
			% c		0.176472	0.187818	0.445215	0.440266
		Partially overlapping CDS	#		26944	26298	29809	22986
			% c		3.48341	3.4516	3.43375	3.48243
		Not overlapping CDS	Within 5'UTR	#	109	90	447	304
				% c	0.0140919	0.0118124	0.0514906	0.0460567
			Partially overlapping 5'UTR	#	791	674	1529	981
				% c	0.102263	0.0884621	0.176128	0.148624
			Within 3'UTR	#	80483	78104	137247	99385
				% c	10.4051	10.2511	15.8097	15.0571
			Partially overlapping 3'UTR	#	25786	24155	45321	33314
				% c	3.3337	3.17033	5.2206	5.04715
			IR	#	10270	9199	17071	11904
				% c	1.32774	1.20736	1.96644	1.80348
	a: # of total bases sequenced / JPCM5 Genome Size (32803248 bp)
	b: % was calculated based on the number of sequenced reads
	c: % was calculated based on the number of reads with both poly(A) and SL sequences (FL reads)
	Table S1. Detailed summary of Oxford Nanopore direct RNA-sequencing reads of L. infantum promastigotes (P1, P2) and axenic amastigotes (A1, A2).

## Sheet: Table S2-Poly(A) context
TriTrypDB Gene ID	Number of poly(A) reads	Primary Poly(A) site	Secondary Poly(A) site	% of reads with the primary poly(A) site	Strand	3' end position of CDS	3'UTR length (nt) ONT reads	3'UTR length (nt) predicted by PRED-A-TERM	Distance between primary and secondary poly(A) sites (nt)	Region of 50 nt upstream the poly(A) site	GC content (%) at 50 nt upstream the poly(A) site	CT content (%) at 50 nt upstream the poly(A) site	Ordered bases 50 nt upstream the poly(A) site	P1 - Distance between poly(A) and closest SL site (≥5 FL reads) (nt)	P2 - Distance between poly(A) and closest SL site (≥5 FL reads) (nt)	A1 - Distance between poly(A) and closest SL site (≥5 FL reads) (nt)	A2 - Distance between poly(A) and closest SL site (≥5 FL reads) (nt)
LINF_010005000	93	1516	1524	21.5054	-	3710	2194	ND	8	LinJ.01:1467-1516	56	54	C(18) > A(13) > G(10) > T(9)	-	-	-	-
LINF_010005100	399	5588	5581	12.0301	-	5804	216	537	7	LinJ.01:5539-5588	52	38	A(17) > G(14) > C(12) > T(7)	-	-	-	-
LINF_010005200	113	8195	8155	16.8142	-	9038	843	1069	40	LinJ.01:8146-8195	52	80	T(22) > C(18) > G(8) > A(2)	-	-	-	-
LINF_010005500	590	17662	17670	35.4237	-	18110	448	498	8	LinJ.01:17613-17662	60	30	A(18) > G(17) > C(13) > T(2)	-	-	550	550
LINF_010005700	1059	22332	22240	30.406	-	22529	197	299	92	LinJ.01:22283-22332	62	54	C(17) > G(14) > T(10) > A(9)	-	-	311	-
LINF_010005800	216	23734	23730	18.0556	-	24799	1065	1119	4	LinJ.01:23685-23734	52	36	A(16) > G(16) > C(10) > T(8)	359	359	359	351
LINF_010005900	336	26011	26057	15.7738	-	26313	302	485	46	LinJ.01:25962-26011	68	52	C(21) > G(13) > A(11) > T(5)	-	343	343	343
LINF_010006000	2062	28111	28112	22.2114	-	28369	258	332	1	LinJ.01:28062-28111	52	50	C(14) > A(13) > G(12) > T(11)	414	414	414	414
LINF_010006100	604	29807	29797	21.0265	-	30160	353	468	10	LinJ.01:29758-29807	70	72	C(30) > A(9) > T(6) > G(5)	557	557	557	557
LINF_010006200	505	32885	32889	25.9406	-	33423	538	591	4	LinJ.01:32836-32885	56	38	G(16) > A(15) > C(12) > T(7)	-	444	444	444
LINF_010006300	134	35251	35252	17.1642	-	36819	1568	1584	1	LinJ.01:35202-35251	60	42	G(20) > T(11) > C(10) > A(9)	515	515	515	515
LINF_010006400	1206	37635	37644	20.8955	-	37805	170	215	9	LinJ.01:37586-37635	54	38	A(17) > G(14) > C(13) > T(6)	-	-	-	-
LINF_010006500	1598	38717	38723	12.7034	-	39020	303	306	6	LinJ.01:38668-38717	58	40	A(16) > C(15) > G(14) > T(5)	422	422	422	422
LINF_010006600	87	39597	39585	11.4943	-	41389	1792	1839	12	LinJ.01:39548-39597	56	36	A(16) > G(16) > C(12) > T(6)	261	261	261	261
LINF_010006700	449	43946	43947	37.8619	-	44184	238	203	1	LinJ.01:43897-43946	68	72	C(23) > T(13) > G(11) > A(3)	-	-	-	-
LINF_010006800	938	47533	47539	18.0171	-	47933	400	759	6	LinJ.01:47484-47533	56	54	C(15) > G(13) > T(12) > A(10)	212	-	-	603
LINF_010006900	981	48929	48820	15.1886	-	49244	315	189	109	LinJ.01:48880-48929	68	58	C(18) > G(16) > T(11) > A(5)	258	258	258	258
LINF_010007200	612	60479	60487	7.35294	-	61569	1090	2813	8	LinJ.01:60430-60479	60	42	G(20) > T(11) > C(10) > A(9)	-	-	-
LINF_010007400	182	65962	66206	27.4725	-	66313	351	356	244	LinJ.01:65913-65962	56	54	C(15) > G(13) > T(12) > A(10)	-	-	-	-
LINF_010007500	570	69347	69341	17.0175	-	70170	823	233	6	LinJ.01:69298-69347	62	50	C(18) > G(13) > A(12) > T(7)	-	-	-	-
LINF_010007700	1187	73710	73697	20.4718	-	74177	467	407	13	LinJ.01:73661-73710	54	40	A(16) > G(14) > C(13) > T(7)	-	484	484	-
LINF_010007800	3004	76395	76394	16.2783	-	76639	244	793	1	LinJ.01:76346-76395	48	50	A(19) > C(18) > T(7) > G(6)	706	706	706	706
LINF_010007900	13463	77637	77640	35.6904	-	78068	431	481	3	LinJ.01:77588-77637	54	46	G(15) > A(12) > C(12) > T(11)	296	296	296	296
LINF_010008200	1111	82829	82831	20.6121	+	82664	165	443	2	LinJ.01:82830-82879	48	62	C(17) > T(14) > A(12) > G(7)	234	253	234	234
LINF_010008300	1871	83995	83901	21.9134	+	83745	250	206	94	LinJ.01:83996-84045	42	48	A(15) > T(14) > G(11) > C(10)	203	203	202	207
LINF_010008400	1470	85104	85106	24.8299	+	84618	486	538	2	LinJ.01:85105-85154	44	32	A(18) > G(16) > T(10) > C(6)	422	422	422	422
LINF_010008500	800	86952	86958	15.375	+	86481	471	527	6	LinJ.01:86953-87002	44	24	A(21) > G(17) > T(7) > C(5)	-	-	-	-
LINF_010008600	244	90894	90893	20.9016	+	90385	509	556	1	LinJ.01:90895-90944	40	42	A(23) > C(14) > T(7) > G(6)	260	260	250	260
LINF_010008800	578	93383	93257	14.1869	+	92992	391	320	126	LinJ.01:93384-93433	68	32	G(27) > T(9) > A(7) > C(7)	-	-	-	-
LINF_010009000	646	100115	100085	23.6842	+	99671	444	600	30	LinJ.01:100116-100165	66	72	C(26) > T(10) > A(7) > G(7)	-	-	386	-
LINF_010009100	569	102487	102393	15.1142	+	102241	246	40	94	LinJ.01:102488-102537	66	50	C(20) > G(13) > A(12) > T(5)	352	352	352	352
LINF_010009200	13551	103991	103990	41.5025	+	103470	521	571	1	LinJ.01:103992-104041	70	34	G(19) > C(16) > A(14) > T(1)	641	641	641	641
LINF_010009400	557	108794	108684	28.1867	+	108368	426	366	110	LinJ.01:108795-108844	64	56	C(20) > G(12) > A(10) > T(8)	-	-	-	-
LINF_010009600	1166	115591	115589	21.2693	+	115080	511	1116	2	LinJ.01:115592-115641	42	44	A(16) > T(13) > G(12) > C(9)	-	-	-	-
LINF_010009800	1041	128118	128132	17.7714	+	127992	126	176	14	LinJ.01:128119-128168	70	74	C(31) > A(9) > T(6) > G(4)	515	515	515	515
LINF_010009900	505	130612	130614	12.0792	+	129902	710	762	2	LinJ.01:130613-130662	58	36	A(18) > C(15) > G(14) > T(3)	535	-	-	-
LINF_010010000	490	134337	134304	28.5714	+	133737	600	619	33	LinJ.01:134338-134387	62	68	C(27) > A(12) > T(7) > G(4)	-	-	-	414
LINF_010010100	105	137270	137269	36.1905	+	136975	295	2480	1	LinJ.01:137271-137320	58	72	C(20) > T(16) > G(9) > A(5)	-	-	-	-
LINF_010010200	1257	141034	141036	22.7526	+	140555	479	238	2	LinJ.01:141035-141084	66	58	C(21) > G(12) > A(9) > T(8)	-	-	-	-
LINF_010010500	316	156118	156115	25.3165	+	155149	969	902	3	LinJ.01:156119-156168	56	60	T(15) > C(15) > G(13) > A(7)	401	401	401	401
LINF_010010600	954	158250	158259	18.3438	+	157716	534	579	9	LinJ.01:158251-158300	56	38	G(17) > A(14) > C(11) > T(8)	-	-	401	401
LINF_010010800	3173	162424	162430	26.3788	+	162245	179	31	6	LinJ.01:162425-162474	54	56	T(19) > G(18) > C(9) > A(4)	-	-	-	-
LINF_010011000	1160	168374	168626	18.2759	+	168125	249	291	252	LinJ.01:168375-168424	64	36	G(21) > A(11) > C(11) > T(7)	-	-	-	-
LINF_010011100	401	174724	174726	15.4613	+	174643	81	197	2	LinJ.01:174725-174774	60	60	C(19) > T(11) > G(11) > A(9)	380	380	380	380
LINF_010011200	1511	176439	176436	39.1132	+	176356	83	52	3	LinJ.01:176440-176489	62	64	C(19) > T(13) > G(12) > A(6)	-	-	-	-
LINF_010011300	273	179510	179491	27.8388	+	178757	753	1167	19	LinJ.01:179511-179560	64	36	G(20) > A(12) > C(12) > T(6)	-	-	-	-
LINF_010011600	963	190955	190975	24.6106	+	190575	380	451	20	LinJ.01:190956-191005	62	50	C(18) > G(13) > A(12) > T(7)	-	-	-	-
LINF_010011700	180	196911	196915	37.7778	+	196465	446	496	4	LinJ.01:196912-196961	64	70	C(24) > T(11) > G(8) > A(7)	-	-	-	-
LINF_010011900	140	206202	206200	26.4286	+	204894	1308	1358	2	LinJ.01:206203-206252	54	62	C(21) > A(13) > T(10) > G(6)	443	443	443	443
LINF_010012200	463	215597	215598	25.27	+	215409	188	239	1	LinJ.01:215598-215647	62	44	C(18) > A(15) > G(13) > T(4)	-	-	-	-
LINF_010012300	527	221154	221150	22.0114	+	220872	282	129	4	LinJ.01:221155-221204	56	54	G(19) > T(18) > C(9) > A(4)	-	-	-	-
LINF_010012500	395	232792	233138	30.6329	+	231934	858	1051	346	LinJ.01:232793-232842	66	48	C(19) > G(14) > A(12) > T(5)	-	-	-	-
LINF_010012800	311	243008	243013	15.7556	+	241376	1632	1698	5	LinJ.01:243009-243058	38	32	A(24) > G(10) > C(9) > T(7)	-	-	-	-
LINF_010013300	317	261822	261814	14.1956	+	261553	269	ND	8	LinJ.01:261823-261872	68	60	C(23) > G(11) > A(9) > T(7)	-	248	248	-
LINF_020005300	611	10348	10350	20.9493	-	10679	331	379	2	LinJ.02:10299-10348	56	40	A(15) > G(15) > C(13) > T(7)	467	439	439	439
LINF_020005400	332	16136	16137	18.0723	-	17547	1411	4532	1	LinJ.02:16087-16136	62	48	G(17) > C(14) > T(10) > A(9)	400	400	400	400
LINF_020005500	763	18687	18716	19.6592	-	18850	163	67	29	LinJ.02:18638-18687	62	68	C(19) > T(15) > G(12) > A(4)	-	256	256	256
LINF_020006200	231	43844	43850	16.0173	-	44234	390	1258	6	LinJ.02:43795-43844	58	52	G(15) > C(14) > T(12) > A(9)	-	-	-	-
LINF_020006500	562	65915	65916	32.5623	-	66104	189	379	1	LinJ.02:65866-65915	60	42	G(16) > C(14) > A(13) > T(7)	-	-	-	-
LINF_020006800	189	85649	85650	18.5185	-	86347	698	3322	1	LinJ.02:85600-85649	50	56	C(17) > A(14) > T(11) > G(8)	379	379	379	379
LINF_020007400	311	118897	118815	21.5434	-	119608	711	1731	82	LinJ.02:118848-118897	44	64	T(23) > G(13) > C(9) > A(5)	-	-	-	-
LINF_020007700	615	130581	130844	24.2276	-	131272	691	759	263	LinJ.02:130532-130581	44	42	A(21) > C(14) > G(8) > T(7)	322	322	322	322
LINF_020008500	708	167396	167381	17.2316	-	167864	468	525	15	LinJ.02:167347-167396	56	44	A(20) > C(20) > G(8) > T(2)	-	-	-	-
LINF_020008600	325	171429	171427	10.7692	-	172810	1381	1435	2	LinJ.02:171380-171429	52	48	A(19) > C(19) > G(7) > T(5)	-	-	-	-
LINF_020008800	965	178034	178032	22.2798	-	178188	154	193	2	LinJ.02:177985-178034	62	52	C(18) > G(13) > A(11) > T(8)	-	-	-	-
LINF_020008900	296	180314	180316	22.2973	-	180883	569	630	2	LinJ.02:180265-180314	52	34	A(19) > G(14) > C(12) > T(5)	570	570	570	570
LINF_020009100	494	182197	182215	15.1822	-	182776	579	578	18	LinJ.02:182148-182197	60	42	G(18) > C(12) > A(11) > T(9)	-	-	-	-
LINF_020009300	1185	195156	195171	16.4557	-	195453	297	3535	15	LinJ.02:195107-195156	54	54	T(15) > G(15) > C(12) > A(8)	301	301	301	301
LINF_020010000	318	221139	221138	18.8679	-	222245	1106	2454	1	LinJ.02:221090-221139	72	68	C(26) > G(10) > T(8) > A(6)	-	-	-	-
LINF_020010300	502	231266	231265	51.1952	-	231992	726	642	1	LinJ.02:231217-231266	64	66	T(17) > G(16) > C(16) > A(1)	-	-	363	363
LINF_020010700	320	250267	250270	15.625	-	250689	422	472	3	LinJ.02:250218-250267	62	30	G(19) > A(16) > C(12) > T(3)	-	-	790	-
LINF_020010900	441	255248	255252	24.7166	-	255627	379	525	4	LinJ.02:255199-255248	56	44	G(16) > A(12) > C(12) > T(10)	451	451	451	451
LINF_020011200	273	312434	312418	31.5018	+	311937	497	513	16	LinJ.02:312435-312484	44	66	T(23) > G(12) > C(10) > A(5)	-	458	458	-
LINF_020011300	310	313981	314779	16.129	+	313620	361	1211	798	LinJ.02:313982-314031	58	46	G(16) > C(13) > A(11) > T(10)	-	-	-	-
LINF_020011400	173	316720	316703	9.24855	+	316157	563	607	17	LinJ.02:316721-316770	62	38	G(18) > A(13) > C(13) > T(6)	515	515	515	515
LINF_020011700	335	327846	327842	24.7761	+	327799	47	116	4	LinJ.02:327847-327896	66	66	C(21) > T(12) > G(12) > A(5)	328	328	328	328
LINF_020011800	525	329636	329635	23.619	+	329276	360	313	1	LinJ.02:329637-329686	50	48	G(17) > T(16) > A(9) > C(8)	-	-	-	-
LINF_020012000	418	335707	335709	12.201	+	334753	954	1437	2	LinJ.02:335708-335757	56	50	C(20) > A(17) > G(8) > T(5)	257	257	257	257
LINF_020012100	1441	337757	337756	27.1339	+	337371	386	431	1	LinJ.02:337758-337807	56	52	C(16) > A(12) > G(12) > T(10)	403	403	403	403
LINF_020012200	839	339973	339984	16.5673	+	339672	301	224	11	LinJ.02:339974-340023	60	70	C(25) > A(10) > T(10) > G(5)	-	-	-	-
LINF_020012300	269	344220	344424	12.2677	+	343268	952	1223	204	LinJ.02:344221-344270	62	56	G(17) > T(14) > C(14) > A(5)	-	-	-	-
LINF_030005000	88	599	608	26.1364	-	1189	590	ND	9	LinJ.03:550-599	56	76	C(21) > T(17) > G(7) > A(5)	-	-	-	-
LINF_030005200	615	8843	8842	17.2358	+	8259	584	631	1	LinJ.03:8844-8893	42	42	A(15) > T(14) > G(14) > C(7)	-	-	-	-
LINF_030005400	1023	14771	14774	14.956	+	14496	275	320	3	LinJ.03:14772-14821	52	40	A(16) > G(14) > C(12) > T(8)	415	415	415	415
LINF_030005500	679	17879	17887	22.975	+	17848	31	25	8	LinJ.03:17880-17929	52	56	T(17) > G(15) > C(11) > A(7)	-	274	227	274
LINF_030005800	1205	25926	25929	17.5934	+	25376	550	603	3	LinJ.03:25927-25976	50	24	A(22) > G(16) > C(9) > T(3)	-	-	639	-
LINF_030006000	426	33314	33170	10.3286	+	32879	435	335	144	LinJ.03:33315-33364	66	42	G(21) > C(12) > T(9) > A(8)	391	391	391	391
LINF_030006100	1634	34756	34751	16.0343	+	34373	383	433	5	LinJ.03:34757-34806	58	36	G(20) > A(12) > T(9) > C(9)	405	405	405	405
LINF_030006300	961	38280	38279	34.4433	+	37841	439	444	1	LinJ.03:38281-38330	52	54	T(15) > G(14) > C(12) > A(9)	-	-	275	-
LINF_030006400	357	41187	41189	14.8459	+	40885	302	358	2	LinJ.03:41188-41237	48	36	A(17) > G(15) > T(9) > C(9)	609	436	609	609
LINF_030006500	1837	42673	42715	12.0849	+	42449	224	26	42	LinJ.03:42674-42723	52	60	C(16) > T(14) > A(10) > G(10)	-	-	-	-
LINF_030006600	441	45266	45264	18.1406	+	44922	344	417	2	LinJ.03:45267-45316	34	50	A(17) > T(16) > C(9) > G(8)	299	301	299	304
LINF_030006700	569	47168	47551	16.1687	+	46456	712	1123	383	LinJ.03:47169-47218	66	56	C(24) > A(13) > G(9) > T(4)	678	678	678	678
LINF_030007000	1188	54851	54850	22.4747	+	54633	218	304	1	LinJ.03:54852-54901	54	42	A(15) > G(14) > C(13) > T(8)	-	-	340	-
LINF_030007100	271	58170	58160	14.3911	+	57681	489	2142	10	LinJ.03:58171-58220	52	68	C(18) > T(16) > A(8) > G(8)	795	795	-	795
LINF_030007200	2380	61513	61515	16.6387	+	61289	224	276	2	LinJ.03:61514-61563	54	46	A(14) > C(14) > G(13) > T(9)	256	256	281	325
LINF_030007900	310	91503	91498	24.1935	+	91082	421	474	5	LinJ.03:91504-91553	50	28	A(24) > C(13) > G(12) > T(1)	-	-	-	-
LINF_030008200	752	100728	100729	20.8777	+	100237	491	542	1	LinJ.03:100729-100778	52	30	A(19) > G(16) > C(10) > T(5)	-	-	-	-
LINF_030008300	265	106939	106858	7.16981	+	105934	1005	2877	81	LinJ.03:106940-106989	66	34	G(23) > A(10) > C(10) > T(7)	386	386	386	386
LINF_030008500	75	121522	120152	9.33333	+	119606	1916	1970	1370	LinJ.03:121523-121572	46	64	T(16) > C(16) > A(11) > G(7)	-	-	-	369
LINF_030008800	32	136283	136285	18.75	+	134005	2278	2249	2	LinJ.03:136284-136333	56	48	C(16) > A(14) > G(12) > T(8)	-	-	-	-
LINF_030008900	339	142516	142530	27.1386	+	142136	380	430	14	LinJ.03:142517-142566	60	32	G(19) > A(15) > C(11) > T(5)	550	550	550	550
LINF_030009000	3500	143966	143965	33.5143	+	143483	483	533	1	LinJ.03:143967-144016	68	42	G(18) > C(16) > A(11) > T(5)	371	370	370	370
LINF_030009100	18361	144916	144915	46.4953	+	144720	196	246	1	LinJ.03:144917-144966	62	48	C(16) > G(15) > A(11) > T(8)	-	-	-	-
LINF_030009200	297	151253	151257	40.404	+	150666	587	5768	4	LinJ.03:151254-151303	64	58	C(18) > G(14) > T(11) > A(7)	524	524	524	524
LINF_030009400	561	164219	164218	17.1123	+	162555	1664	2191	1	LinJ.03:164220-164269	50	32	A(20) > G(14) > C(11) > T(5)	-	-	-	-
LINF_030009800	207	181039	181037	23.6715	+	180403	636	2582	2	LinJ.03:181040-181089	54	70	C(18) > T(17) > G(9) > A(6)	-	-	277	277
LINF_030010000	388	194868	194849	20.8763	+	194512	356	1222	19	LinJ.03:194869-194918	62	46	G(16) > C(15) > A(11) > T(8)	-	-	-	-
LINF_030010500	613	218497	218495	14.845	+	218425	72	53	2	LinJ.03:218498-218547	58	60	C(17) > T(13) > G(12) > A(8)	264	264	264	264
LINF_030010600	1030	220170	220173	12.9126	+	219374	796	859	3	LinJ.03:220171-220220	34	30	A(26) > G(9) > C(8) > T(7)	-	-	-	-
LINF_030010700	780	225438	225448	21.2821	+	225278	160	220	10	LinJ.03:225439-225488	58	34	G(18) > A(15) > C(11) > T(6)	335	335	335	335
LINF_030010800	905	227617	227616	15.2486	+	227148	469	466	1	LinJ.03:227618-227667	58	44	C(18) > A(17) > G(11) > T(4)	204	204	204	204
LINF_030010900	815	229372	229344	26.135	+	229246	126	180	28	LinJ.03:229373-229422	56	42	A(18) > C(17) > G(11) > T(4)	-	-	-	-
LINF_030011200	1738	234927	234885	34.2348	+	234751	176	388	42	LinJ.03:234928-234977	56	38	G(17) > A(14) > C(11) > T(8)	-	-	-	-
LINF_030011400	222	243464	243462	17.1171	+	242430	1034	1091	2	LinJ.03:243465-243514	56	50	C(16) > A(13) > G(12) > T(9)	-	-	-	-
LINF_030011700	318	261213	261202	32.3899	+	260290	923	2117	11	LinJ.03:261214-261263	60	54	C(17) > G(13) > A(10) > T(10)	-	-	-	-
LINF_030011900	550	262199	262268	25.0909	-	262551	352	ND	69	LinJ.03:262150-262199	66	46	C(20) > A(14) > G(13) > T(3)	-	-	-	-
LINF_030012000	293	269673	269675	33.1058	-	269997	324	374	2	LinJ.03:269624-269673	54	66	C(17) > T(16) > G(10) > A(7)	-	-	-	-
LINF_030012100	1656	279149	279151	19.9879	-	279569	420	267	2	LinJ.03:279100-279149	68	58	C(21) > G(13) > A(8) > T(8)	-	-	-	-
LINF_030012300	404	284629	284534	23.5149	-	285568	939	1363	95	LinJ.03:284580-284629	66	70	C(21) > T(14) > G(12) > A(3)	-	-	-	-
LINF_030012400	497	287066	287069	24.9497	-	287693	627	ND	3	LinJ.03:287017-287066	54	34	G(17) > A(16) > C(10) > T(7)	-	-	268	-
LINF_030012600	509	291460	291463	22.9862	-	291654	194	237	3	LinJ.03:291411-291460	48	64	C(18) > T(14) > A(12) > G(6)	-	-	-	-
LINF_030012700	746	293166	293168	27.0777	-	293362	196	384	2	LinJ.03:293117-293166	76	66	C(29) > G(9) > A(8) > T(4)	360	360	360	360
LINF_030012800	637	295468	295443	19.1523	-	295790	322	402	25	LinJ.03:295419-295468	46	32	A(22) > G(12) > C(11) > T(5)	-	-	312	312
LINF_030012900	935	306665	306666	26.2032	-	306816	151	724	1	LinJ.03:306616-306665	52	34	A(18) > G(15) > C(11) > T(6)	-	-	304	-
LINF_030013400	94	333440	333698	14.8936	-	335292	1852	1902	258	LinJ.03:333391-333440	52	32	A(20) > G(14) > C(12) > T(4)	306	-	306	-
LINF_030013500	59	337029	337030	49.1525	-	337567	538	588	1	LinJ.03:336980-337029	70	56	C(22) > G(13) > A(9) > T(6)	-	-	409	409
LINF_030013600	243	340783	340784	33.7449	-	341321	538	293	1	LinJ.03:340734-340783	48	42	A(19) > C(14) > G(10) > T(7)	-	-	-	-
LINF_030013700	411	349343	349336	11.9221	-	349457	114	537	7	LinJ.03:349294-349343	72	64	C(28) > A(10) > G(8) > T(4)	-	-	-	-
LINF_030013800	215	354607	354651	20	-	354747	140	190	44	LinJ.03:354558-354607	66	42	G(18) > C(15) > A(11) > T(6)	-	-	-	-
LINF_030013900	290	359651	359652	23.7931	-	359865	214	264	1	LinJ.03:359602-359651	64	56	C(18) > G(14) > T(10) > A(8)	-	-	-	-
LINF_030014100	476	370041	370034	12.8151	-	370888	847	1310	7	LinJ.03:369992-370041	76	82	C(32) > T(9) > G(6) > A(3)	281	281	281	281
LINF_030014200	1530	372677	372667	12.7451	-	373190	513	381	10	LinJ.03:372628-372677	62	46	C(18) > A(14) > G(13) > T(5)	-	-	331	331
LINF_030014300	1074	374291	374289	21.1359	-	374710	419	75	2	LinJ.03:374242-374291	32	50	T(23) > G(14) > A(11) > C(2)	241	241	241	241
LINF_030014400	662	376122	376127	13.5952	-	376432	310	105	5	LinJ.03:376073-376122	54	50	C(14) > G(13) > A(12) > T(11)	255	255	255	255
LINF_030014500	1297	378914	378959	27.2938	-	379122	208	228	45	LinJ.03:378865-378914	64	60	G(16) > C(16) > T(14) > A(4)	-	-	302	302
LINF_030014600	266	380875	380870	18.4211	-	381594	719	1045	5	LinJ.03:380826-380875	50	30	A(19) > G(16) > C(9) > T(6)	533	533	533	533
LINF_030014800	1541	384819	384815	28.1635	-	384987	168	82	4	LinJ.03:384770-384819	36	32	A(20) > G(14) > T(12) > C(4)	304	304	309	305
LINF_030014900	1274	386409	386419	11.9309	-	386699	290	340	10	LinJ.03:386360-386409	38	26	A(25) > G(12) > C(7) > T(6)	389	389	389	389
LINF_040005000	468	7936	7940	16.8803	+	7229	707	1975	4	LinJ.04:7937-7986	36	24	A(28) > G(10) > C(8) > T(4)	-	-	-	-
LINF_040005200	417	14898	14487	9.59233	+	14419	479	529	411	LinJ.04:14899-14948	58	56	C(16) > G(13) > T(12) > A(9)	345	345	345	345
LINF_040005300	7682	15781	15793	27.9745	+	15632	149	116	12	LinJ.04:15782-15831	56	64	C(20) > T(12) > A(10) > G(8)	241	241	241	-
LINF_040005500	3215	22164	22148	22.675	+	21992	172	222	16	LinJ.04:22165-22214	60	26	G(19) > A(18) > C(11) > T(2)	-	-	-	-
LINF_040005800	1534	29597	29599	25.6193	+	29299	298	375	2	LinJ.04:29598-29647	56	42	G(16) > A(13) > C(12) > T(9)	385	385	385	385
LINF_040005900	5173	30494	30498	23.6033	+	30462	32	86	4	LinJ.04:30495-30544	46	32	A(21) > G(13) > C(10) > T(6)	316	-	316	316
LINF_040006000	349	37707	37715	14.3266	+	37177	530	588	8	LinJ.04:37708-37757	48	28	A(19) > G(17) > T(7) > C(7)	-	-	436	436
LINF_040006100	570	40514	40513	16.4912	+	40064	450	500	1	LinJ.04:40515-40564	76	18	G(29) > A(12) > C(9) > T(0)	354	354	354	354
LINF_040006200	1215	42441	42458	17.1193	+	42209	232	224	17	LinJ.04:42442-42491	56	42	G(15) > A(14) > C(13) > T(8)	357	357	357	357
LINF_040006300	1494	44205	44203	18.34	+	43866	339	382	2	LinJ.04:44206-44255	64	54	C(17) > G(15) > T(10) > A(8)	328	328	328	328
LINF_040006400	1418	45657	45668	27.0804	+	45306	351	412	11	LinJ.04:45658-45707	48	30	G(19) > A(16) > T(10) > C(5)	-	457	394	394
LINF_040006500	770	47615	47618	21.5584	+	47579	36	89	3	LinJ.04:47616-47665	52	62	C(21) > A(14) > T(10) > G(5)	-	-	-	-
LINF_040006900	85	58875	58889	18.8235	+	58416	459	384	14	LinJ.04:58876-58925	62	74	C(27) > T(10) > A(9) > G(4)	-	-	-	-
LINF_040007100	164	63983	63964	13.4146	+	63113	870	1517	19	LinJ.04:63984-64033	60	60	C(16) > T(14) > G(14) > A(6)	-	-	-	-
LINF_040007200	75	68234	68233	14.6667	+	66008	2226	2266	1	LinJ.04:68235-68284	58	26	A(19) > G(18) > C(11) > T(2)	-	-	-	-
LINF_040007500	360	76452	76458	34.1667	+	74916	1536	1602	6	LinJ.04:76453-76502	52	36	A(20) > C(14) > G(12) > T(4)	-	-	-	-
LINF_040007700	607	82938	82935	23.888	+	82805	133	187	3	LinJ.04:82939-82988	58	44	C(19) > A(18) > G(10) > T(3)	339	339	339	339
LINF_040007800	1505	85072	85010	18.8704	+	84892	180	239	62	LinJ.04:85073-85122	58	40	G(17) > A(13) > C(12) > T(8)	-	-	-	-
LINF_040007900	331	91921	91920	19.9396	+	91342	579	891	1	LinJ.04:91922-91971	64	68	C(25) > A(9) > T(9) > G(7)	410	-	410	410
LINF_040008000	793	94751	94749	14.7541	+	94109	642	673	2	LinJ.04:94752-94801	62	42	G(18) > C(13) > A(11) > T(8)	392	392	392	392
LINF_040008200	112	100239	100238	41.0714	+	99075	1164	1111	1	LinJ.04:100240-100289	66	48	C(22) > A(15) > G(11) > T(2)	-	-	259	259
LINF_040008400	905	105901	106047	13.7017	+	105726	175	384	146	LinJ.04:105902-105951	56	26	G(20) > A(17) > C(8) > T(5)	419	419	419	419
LINF_040008800	1592	119102	119114	23.4925	+	118973	129	8911	12	LinJ.04:119103-119152	56	46	C(19) > A(18) > G(9) > T(4)	-	-	-	-
LINF_040008900	240	126826	127146	18.75	-	128256	1430	ND	320	LinJ.04:126777-126826	62	56	G(18) > T(15) > C(13) > A(4)	-	-	-	-
LINF_040009000	269	132351	132352	16.3569	-	132857	506	3247	1	LinJ.04:132302-132351	52	24	A(19) > G(19) > C(7) > T(5)	-	-	-	-
LINF_040009100	339	135235	135236	25.3687	-	135367	132	188	1	LinJ.04:135186-135235	58	50	G(21) > T(17) > C(8) > A(4)	-	-	-	-
LINF_040009200	405	139949	139951	36.7901	-	141015	1066	1544	2	LinJ.04:139900-139949	52	48	A(13) > G(13) > C(13) > T(11)	-	-	553	-
LINF_040009300	164	142741	142644	11.5854	-	143426	685	832	97	LinJ.04:142692-142741	60	50	C(18) > A(13) > G(12) > T(7)	313	313	313	313
LINF_040009400	99	158913	158912	37.3737	-	159364	451	2608	1	LinJ.04:158864-158913	56	56	T(15) > G(15) > C(13) > A(7)	172	172	172	172
LINF_040009600	694	173362	173363	30.8357	-	174145	783	3568	1	LinJ.04:173313-173362	56	30	G(20) > A(15) > C(8) > T(7)	395	395	395	395
LINF_040009650	423	176289	175850	10.8747	-	176402	113	368	439	LinJ.04:176240-176289	66	72	C(22) > T(14) > G(11) > A(3)	660	660	660	660
LINF_040009700	16856	179739	179734	18.9013	-	180396	657	710	5	LinJ.04:179690-179739	60	44	C(18) > A(16) > G(12) > T(4)	-	-	548	-
LINF_040009800	973	181469	181479	15.3135	-	181577	108	86	10	LinJ.04:181420-181469	64	70	C(22) > T(13) > G(10) > A(5)	438	363	438	438
LINF_040009900	786	183352	183340	22.5191	-	183825	473	745	12	LinJ.04:183303-183352	56	64	C(18) > T(14) > G(10) > A(8)	366	366	366	366
LINF_040010000	106	185348	185343	30.1887	-	185749	401	451	5	LinJ.04:185299-185348	54	40	A(15) > G(15) > C(12) > T(8)	-	-	382	382
LINF_040010400	223	212238	212239	17.0404	-	213029	791	2022	1	LinJ.04:212189-212238	64	66	C(21) > T(12) > G(11) > A(6)	297	297	297	297
LINF_040010600	1121	227107	227098	19.1793	-	227365	258	6411	9	LinJ.04:227058-227107	62	54	G(16) > C(15) > T(12) > A(7)	-	-	-	-
LINF_040010700	912	228683	228673	21.1623	-	228808	125	65	10	LinJ.04:228634-228683	64	74	C(26) > T(11) > A(7) > G(6)	257	257	257	257
LINF_040010800	959	234883	234879	28.1543	-	235535	652	1412	4	LinJ.04:234834-234883	46	38	A(17) > G(14) > T(10) > C(9)	336	336	336	336
LINF_040010900	916	236937	236938	17.4672	-	237178	241	181	1	LinJ.04:236888-236937	54	46	G(22) > T(18) > A(5) > C(5)	213	213	391	391
LINF_040011000	386	238591	238570	16.5803	-	238745	154	214	21	LinJ.04:238542-238591	50	32	A(19) > G(15) > C(10) > T(6)	533	533	533	-
LINF_040011200	507	251014	251055	12.426	-	251316	302	311	41	LinJ.04:250965-251014	40	60	T(18) > A(12) > C(12) > G(8)	-	-	-	-
LINF_040011400	9180	259831	259840	21.427	-	260136	305	72	9	LinJ.04:259782-259831	50	40	G(16) > A(14) > T(11) > C(9)	267	267	267	267
LINF_040011600	687	264610	264612	21.8341	-	264848	238	638	2	LinJ.04:264561-264610	48	26	A(22) > G(15) > C(9) > T(4)	-	-	-	-
LINF_040011700	1234	269139	269141	22.6904	-	269560	421	469	2	LinJ.04:269090-269139	68	62	C(28) > A(13) > G(6) > T(3)	-	-	-	-
LINF_040011800	2421	270767	270769	33.9116	-	271575	808	759	2	LinJ.04:270718-270767	62	56	G(17) > T(14) > C(14) > A(5)	284	284	284	284
LINF_040011900	648	272765	272766	18.2099	-	273320	555	703	1	LinJ.04:272716-272765	68	38	G(19) > C(15) > A(12) > T(4)	602	602	602	602
LINF_040012000	386	274860	274865	20.4663	-	275728	868	1051	5	LinJ.04:274811-274860	58	54	G(15) > C(14) > T(13) > A(8)	463	463	463	463
LINF_040012200	236	282886	282882	15.678	-	283285	399	371	4	LinJ.04:282837-282886	60	38	A(16) > G(15) > C(15) > T(4)	-	-	-	-
LINF_040012500	341	294905	294902	28.4457	-	295300	395	437	3	LinJ.04:294856-294905	60	44	C(16) > A(14) > G(14) > T(6)	-	-	175	175
LINF_040012600	11815	298409	298418	30.5798	-	298643	234	284	9	LinJ.04:298360-298409	66	42	C(17) > G(16) > A(13) > T(4)	-	-	-	-
LINF_040012700	20454	299700	299699	34.404	-	300364	664	714	1	LinJ.04:299651-299700	60	30	G(18) > A(17) > C(12) > T(3)	316	316	316	316
LINF_040012800	3812	301373	301362	24.3704	-	302191	818	826	11	LinJ.04:301324-301373	58	42	G(17) > A(12) > C(12) > T(9)	402	402	402	402
LINF_040012900	929	303102	303099	31.7546	-	303399	297	360	3	LinJ.04:303053-303102	58	38	A(16) > G(15) > C(14) > T(5)	308	308	308	308
LINF_040013050	1529	310925	310917	8.6985	-	311432	507	908	8	LinJ.04:310876-310925	58	44	C(17) > A(16) > G(12) > T(5)	-	-	-	-
LINF_040013100	695	312940	312965	20.7194	-	313525	585	644	25	LinJ.04:312891-312940	62	58	C(21) > A(11) > G(10) > T(8)	455	455	455	455
LINF_040013200	1067	315967	315961	14.2455	-	316236	269	325	6	LinJ.04:315918-315967	48	28	A(20) > G(16) > C(8) > T(6)	-	315	-	-
LINF_040013300	308	318073	318063	22.4026	-	318397	324	ND	10	LinJ.04:318024-318073	54	30	A(19) > G(16) > C(11) > T(4)	409	409	409	409
LINF_040013400	1381	323657	323654	20.8545	-	323811	154	509	3	LinJ.04:323608-323657	50	42	A(18) > C(14) > G(11) > T(7)	-	-	342	342
LINF_040013600	2345	329626	329631	15.0107	-	329839	213	258	5	LinJ.04:329577-329626	56	40	G(18) > A(12) > T(10) > C(10)	-	295	295	295
LINF_040013800	1084	339455	339478	15.4982	-	339772	317	959	23	LinJ.04:339406-339455	60	64	C(24) > A(12) > T(8) > G(6)	-	-	-	-
LINF_040014000	383	347016	347017	28.7206	-	347395	379	1022	1	LinJ.04:346967-347016	58	56	C(18) > A(11) > G(11) > T(10)	-	-	-	-
LINF_040014100	1017	354494	354493	28.1219	-	355207	713	1570	1	LinJ.04:354445-354494	58	38	A(16) > G(15) > C(14) > T(5)	-	-	260	260
LINF_040014300	1287	361221	361218	14.8407	-	361694	473	1591	3	LinJ.04:361172-361221	58	30	A(18) > G(17) > C(12) > T(3)	387	387	387	387
LINF_040014700	464	369587	369585	27.3707	-	370115	528	580	2	LinJ.04:369538-369587	64	46	G(17) > C(15) > A(10) > T(8)	293	293	293	293
LINF_040015000	2584	378594	378600	24.8065	-	378835	241	56	6	LinJ.04:378545-378594	60	54	G(16) > C(14) > T(13) > A(7)	-	-	201	-
LINF_040015100	407	380175	380173	17.9361	-	380649	474	264	2	LinJ.04:380126-380175	60	54	C(22) > A(15) > G(8) > T(5)	200	200	200	200
LINF_040015400	1789	386870	386879	18.8932	-	387839	969	564	9	LinJ.04:386821-386870	62	60	C(22) > A(11) > G(9) > T(8)	394	394	394	394
LINF_040015600	1059	392576	392137	14.8253	-	392887	311	1962	439	LinJ.04:392527-392576	46	62	T(20) > G(12) > C(11) > A(7)	-	-	464	-
LINF_040015700	1298	394890	394893	10.9399	-	395129	239	1160	3	LinJ.04:394841-394890	62	46	C(17) > G(14) > A(13) > T(6)	856	856	844	856
LINF_040015800	4188	397033	397022	19.9618	-	397056	23	84	11	LinJ.04:396984-397033	46	50	A(18) > C(16) > T(9) > G(7)	236	236	236	236
LINF_040016000	427	401379	401380	24.1218	-	401639	260	69	1	LinJ.04:401330-401379	46	52	T(16) > G(13) > A(11) > C(10)	-	-	-	-
LINF_040016200	527	408311	408312	12.7135	-	408542	231	114	1	LinJ.04:408262-408311	60	48	C(16) > G(14) > A(12) > T(8)	374	239	233	233
LINF_040016300	314	412488	412415	9.23567	-	413321	833	1005	73	LinJ.04:412439-412488	52	70	C(22) > T(13) > A(11) > G(4)	-	-	712	712
LINF_040016500	1102	418005	418006	48.4574	-	418270	265	184	1	LinJ.04:417956-418005	64	52	C(21) > A(13) > G(11) > T(5)	231	231	231	231
LINF_040016600	3897	419661	419664	19.2969	-	419872	211	24	3	LinJ.04:419612-419661	58	58	C(17) > T(12) > G(12) > A(9)	229	229	229	229
LINF_040016700	111	421007	421011	18.9189	-	422570	1563	1674	4	LinJ.04:420958-421007	60	62	C(19) > T(12) > G(11) > A(8)	563	563	563	563
LINF_040016800	1631	424337	424336	12.7529	-	424728	391	449	1	LinJ.04:424288-424337	58	44	G(15) > C(14) > A(13) > T(8)	-	-	-	-
LINF_040017100	1640	446934	446947	25	-	447105	171	790	13	LinJ.04:446885-446934	52	52	T(13) > G(13) > C(13) > A(11)	-	-	-	-
LINF_050005000	204	8022	8024	15.1961	+	7825	197	14	2	LinJ.05:8023-8072	46	38	A(16) > G(15) > T(11) > C(8)	223	224	224	224
LINF_050005100	5122	8790	8802	13.4518	+	8702	88	138	12	LinJ.05:8791-8840	42	36	A(24) > C(13) > G(8) > T(5)	352	352	352	352
LINF_050005200	3366	10369	10366	24.8663	+	9807	562	137	3	LinJ.05:10370-10419	50	62	C(16) > T(15) > A(10) > G(9)	-	429	-	-
LINF_050005300	1003	13284	13283	14.9551	+	12659	625	593	1	LinJ.05:13285-13334	66	66	C(24) > T(9) > G(9) > A(8)	-	-	-	-
LINF_050005500	481	20318	20322	14.7609	+	20087	231	1475	4	LinJ.05:20319-20368	56	38	A(16) > G(15) > C(13) > T(6)	-	309	309	309
LINF_050005600	2724	22794	22796	17.5844	+	22491	303	360	2	LinJ.05:22795-22844	56	32	A(17) > G(17) > C(11) > T(5)	495	495	495	495
LINF_050005700	2888	24291	24289	15.1316	+	23975	316	793	2	LinJ.05:24292-24341	58	36	G(18) > A(14) > C(11) > T(7)	473	473	473	473
LINF_050005900	77	29947	29425	14.2857	+	29552	395	3203	522	LinJ.05:29948-29997	54	70	C(18) > T(17) > G(9) > A(6)	-	-	-	-
LINF_050006000	2341	33853	33858	18.8381	+	33577	276	336	5	LinJ.05:33854-33903	56	36	A(20) > C(16) > G(12) > T(2)	311	311	311	311
LINF_050006100	1297	36041	36039	12.1049	+	35596	445	1187	2	LinJ.05:36042-36091	62	50	C(17) > G(14) > A(11) > T(8)	-	-	479	479
LINF_050006400	709	46586	46598	14.1044	+	46380	206	555	12	LinJ.05:46587-46636	60	40	A(15) > G(15) > C(15) > T(5)	-	-	-	543
LINF_050006500	650	49125	49117	22	+	48994	131	211	8	LinJ.05:49126-49175	54	42	A(15) > G(14) > C(13) > T(8)	-	-	-	-
LINF_050006600	460	52234	52237	32.8261	+	51800	434	933	3	LinJ.05:52235-52284	48	46	A(15) > G(12) > C(12) > T(11)	-	-	-	-
LINF_050006800	569	57578	57581	13.3568	+	57297	281	326	3	LinJ.05:57579-57628	54	16	A(21) > G(21) > C(6) > T(2)	-	-	-	-
LINF_050006900	563	60722	60734	42.6288	+	60541	181	238	12	LinJ.05:60723-60772	58	36	A(18) > C(15) > G(14) > T(3)	-	-	-	-
LINF_050007000	809	66091	66090	24.3511	+	65786	305	603	1	LinJ.05:66092-66141	62	56	C(19) > G(12) > A(10) > T(9)	-	-	-	-
LINF_050007200	1177	76376	76367	46.559	+	75905	471	7369	9	LinJ.05:76377-76426	52	70	C(18) > T(17) > G(8) > A(7)	-	321	321	321
LINF_050007600	608	88570	88564	32.5658	+	88416	154	204	6	LinJ.05:88571-88620	50	52	C(15) > A(14) > T(11) > G(10)	361	361	361	361
LINF_050007800	2918	92367	92323	37.2515	+	92004	363	920	44	LinJ.05:92368-92417	68	74	C(26) > T(11) > G(8) > A(5)	848	848	848	848
LINF_050008000	1044	98078	98076	31.8966	+	97880	198	232	2	LinJ.05:98079-98128	60	38	G(18) > A(13) > C(12) > T(7)	356	356	356	356
LINF_050008400	839	105829	106100	28.7247	+	105429	400	708	271	LinJ.05:105830-105879	58	40	G(20) > T(11) > A(10) > C(9)	677	677	677	677
LINF_050008500	2319	108917	108909	22.251	+	108361	556	269	8	LinJ.05:108918-108967	68	72	C(24) > T(12) > G(10) > A(4)	291	-	291	291
LINF_050008600	1035	111410	111402	39.1304	+	111193	217	267	8	LinJ.05:111411-111460	48	48	T(15) > G(15) > A(11) > C(9)	395	-	395	-
LINF_050008700	317	113921	113901	19.2429	+	112991	930	1074	20	LinJ.05:113922-113971	62	48	C(18) > A(13) > G(13) > T(6)	-	-	-	-
LINF_050008900	18	129949	129948	44.4444	+	128604	1345	1395	1	LinJ.05:129950-129999	50	38	G(17) > A(14) > T(11) > C(8)	-	-	-	-
LINF_050009000	282	134862	134864	23.0496	+	134288	574	628	2	LinJ.05:134863-134912	48	42	A(16) > G(13) > C(11) > T(10)	-	-	334	-
LINF_050009100	656	138387	138385	16.7683	+	138070	317	128	2	LinJ.05:138388-138437	60	64	C(17) > T(15) > G(13) > A(5)	325	325	325	325
LINF_050009300	352	144334	144341	11.9318	+	144111	223	276	7	LinJ.05:144335-144384	60	40	G(16) > A(14) > C(14) > T(6)	-	-	197	-
LINF_050009400	535	147281	147282	54.9533	+	147219	62	983	1	LinJ.05:147282-147331	56	32	A(20) > G(14) > C(14) > T(2)	1095	1095	1095	1095
LINF_050009500	9687	149321	149325	25.9213	+	149087	234	284	4	LinJ.05:149322-149371	46	40	A(19) > C(12) > G(11) > T(8)	-	-	-	-
LINF_050009700	723	154671	154320	9.54357	+	154072	599	349	351	LinJ.05:154672-154721	48	70	T(20) > C(15) > G(9) > A(6)	-	-	-	-
LINF_050009900	817	161459	161461	13.5863	+	160877	582	1371	2	LinJ.05:161460-161509	56	16	G(22) > A(20) > C(6) > T(2)	-	-	511	511
LINF_050010200	216	172019	172018	20.8333	+	170634	1385	2058	1	LinJ.05:172020-172069	68	48	G(19) > C(15) > T(9) > A(7)	434	434	434	434
LINF_050010300	1111	174500	174317	19.982	+	174262	238	534	183	LinJ.05:174501-174550	66	44	G(19) > C(14) > A(9) > T(8)	-	-	-	-
LINF_050010400	375	181451	181507	14.4	+	181361	90	255	56	LinJ.05:181452-181501	70	74	C(26) > T(11) > G(9) > A(4)	340	340	340	340
LINF_050010500	2639	182572	182568	29.9356	+	182323	249	299	4	LinJ.05:182573-182622	60	60	C(20) > A(10) > T(10) > G(10)	510	-	510	510
LINF_050010600	487	185323	185317	9.85626	+	184685	638	743	6	LinJ.05:185324-185373	66	24	G(24) > A(14) > C(9) > T(3)	-	-	-	-
LINF_050010700	29	189439	189436	31.0345	+	187285	2154	1896	3	LinJ.05:189440-189489	66	68	C(22) > T(12) > G(11) > A(5)	322	322	322	322
LINF_050011000	906	200348	200353	18.7638	+	200152	196	268	5	LinJ.05:200349-200398	52	46	A(17) > C(16) > G(10) > T(7)	-	-	-	-
LINF_050011100	781	203657	203658	17.7977	+	203538	119	254	1	LinJ.05:203658-203707	56	56	T(17) > G(17) > C(11) > A(5)	-	-	-	-
LINF_050011300	338	211175	211179	24.5562	+	210909	266	217	4	LinJ.05:211176-211225	60	36	G(19) > A(13) > C(11) > T(7)	-	-	-	-
LINF_050011400	474	215820	215830	22.3629	+	215512	308	368	10	LinJ.05:215821-215870	52	52	C(16) > A(14) > T(10) > G(10)	-	-	-	-
LINF_050011700	1231	230095	230089	13.485	+	229890	205	252	6	LinJ.05:230096-230145	62	42	G(16) > C(15) > A(13) > T(6)	-	-	-	-
LINF_050011900	906	241820	241831	11.5894	+	241598	222	1	11	LinJ.05:241821-241870	58	74	C(22) > T(15) > G(7) > A(6)	-	-	-	-
LINF_050012300	477	266499	266501	25.5765	+	265863	636	ND	2	LinJ.05:266500-266549	60	44	G(19) > T(11) > C(11) > A(9)	341	341	341	341
LINF_050012500	184	277099	277104	16.3043	+	276063	1036	1086	5	LinJ.05:277100-277149	68	72	C(29) > A(9) > T(7) > G(5)	549	-	549	549
LINF_050012800	241	288913	288902	16.5975	+	288388	525	978	11	LinJ.05:288914-288963	58	66	C(19) > T(14) > G(10) > A(7)	284	284	280	280
LINF_050013200	1021	301825	301824	26.6405	+	301364	461	805	1	LinJ.05:301826-301875	56	34	G(19) > A(14) > C(9) > T(8)	297	297	297	297
LINF_050013600	357	316162	316166	27.451	+	315715	447	701	4	LinJ.05:316163-316212	54	44	A(15) > C(14) > G(13) > T(8)	-	-	686	-
LINF_050013700	257	319577	319576	25.2918	+	319061	516	434	1	LinJ.05:319578-319627	66	56	C(18) > G(15) > T(10) > A(7)	411	411	411	411
LINF_050013800	1006	320839	320841	14.8111	+	320621	218	270	2	LinJ.05:320840-320889	60	42	G(15) > C(15) > A(14) > T(6)	-	-	-	-
LINF_050014100	553	336623	336622	37.9747	+	335965	658	690	1	LinJ.05:336624-336673	54	36	G(18) > A(14) > T(9) > C(9)	-	-	350	-
LINF_050014200	331	339255	339254	38.3686	+	337989	1266	1102	1	LinJ.05:339256-339305	58	60	T(17) > G(16) > C(13) > A(4)	-	-	357	357
LINF_050014300	641	343129	343140	13.5725	+	343100	29	100	11	LinJ.05:343130-343179	58	64	C(21) > T(11) > A(10) > G(8)	-	-	-	-
LINF_050014500	419	350481	350517	13.3652	+	350108	373	564	36	LinJ.05:350482-350531	48	68	T(21) > C(13) > G(11) > A(5)	-	-	-	-
LINF_050014700	544	360468	360469	14.3382	+	359830	638	988	1	LinJ.05:360469-360518	66	52	C(18) > G(15) > A(9) > T(8)	486	-	612	612
LINF_050014800	898	363430	363615	15.9243	+	363150	280	ND	185	LinJ.05:363431-363480	54	50	G(19) > T(17) > C(8) > A(6)	-	409	409	409
LINF_050015100	697	372252	372251	16.0689	-	372567	315	ND	1	LinJ.05:372203-372252	56	46	C(19) > A(18) > G(9) > T(4)	-	-	-	-
LINF_050015200	802	374838	374845	16.0848	-	375084	246	520	7	LinJ.05:374789-374838	72	52	C(21) > G(15) > A(9) > T(5)	473	473	473	473
LINF_050015400	341	378041	378042	34.6041	-	379294	1253	1303	1	LinJ.05:377992-378041	56	64	C(21) > A(11) > T(11) > G(7)	402	402	402	402
LINF_050015600	290	382787	382789	25.5172	-	383270	483	528	2	LinJ.05:382738-382787	52	48	A(16) > C(16) > G(10) > T(8)	-	-	279	279
LINF_050015700	1464	386350	386345	19.877	-	386548	198	241	5	LinJ.05:386301-386350	50	28	A(21) > G(15) > C(10) > T(4)	-	-	-	-
LINF_050016000	403	396873	396870	18.6104	+	396062	811	861	3	LinJ.05:396874-396923	56	40	G(16) > A(14) > C(12) > T(8)	-	-	-	-
LINF_050016100	443	400287	400286	25.2822	+	399595	692	1622	1	LinJ.05:400288-400337	50	40	G(17) > A(13) > T(12) > C(8)	317	317	317	317
LINF_050016200	62	405491	404957	20.9677	+	403888	1603	1675	534	LinJ.05:405492-405541	48	52	A(20) > C(20) > T(6) > G(4)	436	436	436	436
LINF_050016500	1154	418208	418677	17.0711	+	418094	114	5148	469	LinJ.05:418209-418258	62	58	C(18) > G(13) > T(11) > A(8)	-	-	-	-
LINF_050016700	823	423171	423185	26.4885	-	423521	350	ND	14	LinJ.05:423122-423171	70	38	G(19) > C(16) > A(12) > T(3)	337	337	337	337
LINF_050016800	535	425125	425130	13.8318	-	425335	210	266	5	LinJ.05:425076-425125	56	54	C(20) > A(15) > G(8) > T(7)	373	373	373	373
LINF_050017100	579	431580	431582	48.1865	-	431793	213	263	2	LinJ.05:431531-431580	66	58	C(18) > G(15) > T(11) > A(6)	224	224	224	224
LINF_050017400	1135	442064	442065	20.7048	-	442721	657	641	1	LinJ.05:442015-442064	44	48	T(16) > G(14) > A(12) > C(8)	255	255	255	255
LINF_050017500	178	447531	447534	14.6067	+	447159	372	16606	3	LinJ.05:447532-447581	40	32	A(23) > G(11) > C(9) > T(7)	-	-	-	-
LINF_060006200	697	46432	46430	19.2253	-	46982	550	589	2	LinJ.06:46383-46432	60	28	G(21) > A(15) > C(9) > T(5)	357	357	357	357
LINF_060006500	1153	53097	53099	33.3044	-	53741	644	842	2	LinJ.06:53048-53097	66	40	G(17) > C(16) > A(13) > T(4)	564	564	564	564
LINF_060006600	4814	55027	55034	15.8081	-	55317	290	340	7	LinJ.06:54978-55027	56	16	G(22) > A(20) > C(6) > T(2)	323	323	323	323
LINF_060006700	794	56078	56076	30.7305	-	56273	195	247	2	LinJ.06:56029-56078	60	50	C(19) > A(14) > G(11) > T(6)	402	402	402	402
LINF_060006800	703	58488	58469	40.6828	-	59006	518	562	19	LinJ.06:58439-58488	48	46	G(14) > A(13) > T(13) > C(10)	355	355	355	355
LINF_060006900	887	59841	59842	44.0812	-	59922	81	40	1	LinJ.06:59792-59841	56	70	C(18) > T(17) > G(10) > A(5)	314	314	314	314
LINF_060007000	383	62986	62987	29.765	-	63491	505	558	1	LinJ.06:62937-62986	52	40	G(17) > A(13) > T(11) > C(9)	445	-	445	445
LINF_060007200	1409	69061	69063	18.9496	-	69594	533	315	2	LinJ.06:69012-69061	60	66	C(21) > T(12) > G(9) > A(8)	-	238	238	238
LINF_060007400	395	70748	70749	16.7089	-	71211	463	801	1	LinJ.06:70699-70748	60	38	G(17) > A(14) > C(13) > T(6)	310	317	317	317
LINF_060007500	1322	73794	73795	32.9047	-	74118	324	377	1	LinJ.06:73745-73794	46	34	A(22) > C(12) > G(11) > T(5)	333	-	333	333
LINF_060007900	177	83376	83379	18.0791	-	84476	1100	1012	3	LinJ.06:83327-83376	60	50	C(16) > G(14) > A(11) > T(9)	-	282	282	282
LINF_060008200	558	97640	97642	29.0323	-	97735	95	1606	2	LinJ.06:97591-97640	66	54	C(20) > G(13) > A(10) > T(7)	233	233	233	-
LINF_060008300	1251	100139	100136	17.7458	-	100775	636	1336	3	LinJ.06:100090-100139	44	30	A(20) > G(15) > T(8) > C(7)	437	437	437	437
LINF_060008400	264	104736	105237	8.71212	-	105156	420	2712	501	LinJ.06:104687-104736	52	84	C(22) > T(20) > A(4) > G(4)	-	-	-	-
LINF_060008500	624	107616	107614	17.7885	-	107784	168	220	2	LinJ.06:107567-107616	56	62	C(23) > A(14) > T(8) > G(5)	-	-	314	314
LINF_060008700	759	116485	116489	25.5599	-	116619	134	187	4	LinJ.06:116436-116485	40	46	A(19) > C(12) > T(11) > G(8)	-	-	-	-
LINF_060008800	928	119694	119696	22.7371	-	120089	395	194	2	LinJ.06:119645-119694	50	62	C(16) > T(15) > A(10) > G(9)	-	-	260	260
LINF_060008900	717	121804	121806	16.8759	-	121898	94	123	2	LinJ.06:121755-121804	34	52	A(18) > T(15) > C(11) > G(6)	285	285	285	285
LINF_060009000	1707	131678	131677	42.2964	+	131056	622	246	1	LinJ.06:131679-131728	44	42	A(16) > G(13) > T(12) > C(9)	248	248	248	248
LINF_060009100	2033	133080	133089	27.8898	+	133068	12	308	9	LinJ.06:133081-133130	40	62	T(17) > C(14) > A(13) > G(6)	250	250	250	250
LINF_060009200	853	136817	136809	36.4596	+	136743	74	124	8	LinJ.06:136818-136867	52	44	A(15) > G(13) > C(13) > T(9)	-	124	124	124
LINF_060009600	30240	144648	144647	31.918	+	144159	489	1046	1	LinJ.06:144649-144698	70	40	G(19) > C(16) > A(11) > T(4)	-	554	554	554
LINF_060009700	440	148283	148280	41.8182	+	148009	274	1218	3	LinJ.06:148284-148333	60	48	C(18) > A(14) > G(12) > T(6)	-	-	456	-
LINF_060009800	536	152153	152151	19.2164	+	151646	507	49	2	LinJ.06:152154-152203	56	38	A(17) > G(14) > C(14) > T(5)	-	-	508	508
LINF_060009900	218	156827	156819	28.8991	+	155852	975	1025	8	LinJ.06:156828-156877	52	32	A(19) > G(15) > C(11) > T(5)	-	-	486	486
LINF_060010000	886	159505	159407	18.8488	+	159177	328	1460	98	LinJ.06:159506-159555	58	76	C(24) > T(14) > A(7) > G(5)	187	187	187	187
LINF_060010100	716	165609	165731	2.65363	+	165363	246	174	122	LinJ.06:165610-165659	48	66	T(18) > C(15) > G(9) > A(8)	-	-	-	-
LINF_060010200	938	170428	170429	6.60981	+	170128	300	468	1	LinJ.06:170429-170478	58	26	G(21) > A(16) > C(8) > T(5)	488	488	488	488
LINF_060010400	1536	172429	172411	12.6302	+	172125	304	348	18	LinJ.06:172430-172479	58	36	A(17) > G(15) > C(14) > T(4)	333	333	333	333
LINF_060010500	953	175393	175390	16.3694	+	174749	644	2963	3	LinJ.06:175394-175443	62	76	C(22) > T(16) > G(9) > A(3)	416	-	301	301
LINF_060010800	439	188827	188824	26.4237	+	188733	94	133	3	LinJ.06:188828-188877	60	48	C(16) > G(14) > A(12) > T(8)	249	583	249	249
LINF_060010900	836	190547	191213	11.7225	+	190298	249	965	666	LinJ.06:190548-190597	56	58	T(17) > G(16) > C(12) > A(5)	-	-	1074	1074
LINF_060011000	776	194650	194559	13.7887	+	194330	320	288	91	LinJ.06:194651-194700	44	60	T(21) > G(13) > C(9) > A(7)	-	-	-	-
LINF_060011100	749	200550	200548	39.2523	+	200459	91	683	2	LinJ.06:200551-200600	60	66	C(18) > T(15) > G(12) > A(5)	224	224	224	224
LINF_060011200	1192	203106	203104	26.8456	+	202201	905	412	2	LinJ.06:203107-203156	42	48	A(15) > T(14) > G(11) > C(10)	420	420	420	420
LINF_060011300	17838	204057	204056	22.7828	+	204003	54	108	1	LinJ.06:204058-204107	54	46	G(15) > A(12) > C(12) > T(11)	375	376	375	372
LINF_060011500	614	211142	211143	23.4528	+	211061	81	121	1	LinJ.06:211143-211192	64	50	C(17) > G(15) > A(10) > T(8)	-	-	-	-
LINF_060011600	177	216667	216311	8.47458	+	216034	633	172	356	LinJ.06:216668-216717	64	54	C(21) > A(12) > G(11) > T(6)	222	222	222	222
LINF_060011800	661	223520	223516	25.7186	+	222954	566	1184	4	LinJ.06:223521-223570	60	40	G(20) > A(10) > T(10) > C(10)	278	-	-	-
LINF_060011900	156	231491	231487	34.6154	+	230311	1180	1233	4	LinJ.06:231492-231541	48	36	A(21) > C(13) > G(11) > T(5)	-	-	-	-
LINF_060012200	271	251808	251800	17.3432	+	251005	803	1504	8	LinJ.06:251809-251858	68	62	C(20) > G(14) > T(11) > A(5)	-	-	-	-
LINF_060012300	138	258539	258532	15.942	+	257455	1084	1136	7	LinJ.06:258540-258589	50	40	A(18) > C(13) > G(12) > T(7)	248	248	244	244
LINF_060012500	1163	261858	261859	27.773	+	261705	153	1699	1	LinJ.06:261859-261908	62	36	G(21) > A(11) > C(10) > T(8)	-	-	-	-
LINF_060012600	321	270995	270994	39.5639	+	270719	276	2034	1	LinJ.06:270996-271045	66	70	C(29) > A(11) > T(6) > G(4)	-	-	-	-
LINF_060013100	358	298379	298376	30.4469	+	298199	180	155	3	LinJ.06:298380-298429	58	44	G(17) > C(12) > A(11) > T(10)	-	-	494	494
LINF_060013200	566	301775	301779	16.6078	+	301062	713	771	4	LinJ.06:301776-301825	42	28	A(23) > G(13) > C(8) > T(6)	-	-	-	-
LINF_060013300	196	306210	306201	15.8163	+	305753	457	3352	9	LinJ.06:306211-306260	52	46	G(15) > A(12) > T(12) > C(11)	-	-	336	336
LINF_060013600	303	339042	339034	13.5314	+	338212	830	362	8	LinJ.06:339043-339092	52	62	T(18) > G(13) > C(13) > A(6)	-	-	-	-
LINF_060013800	235	357133	357125	26.8085	+	356865	268	310	8	LinJ.06:357134-357183	48	48	A(13) > T(13) > G(13) > C(11)	-	-	-	-
LINF_060014100	886	368160	368171	21.6704	+	367600	560	1297	11	LinJ.06:368161-368210	50	62	C(19) > A(13) > T(12) > G(6)	415	413	332	-
LINF_060014200	449	380852	380827	27.8396	+	380522	330	556	25	LinJ.06:380853-380902	52	56	T(15) > G(13) > C(13) > A(9)	-	-	515	515
LINF_060014300	186	384163	384160	27.4194	+	383175	988	1038	3	LinJ.06:384164-384213	58	66	C(20) > T(13) > G(9) > A(8)	-	-	365	365
LINF_060014400	574	387026	387024	23.1707	+	386215	811	1098	2	LinJ.06:387027-387076	60	52	C(18) > A(12) > G(12) > T(8)	-	505	505	505
LINF_060014500	399	390150	390258	9.02256	+	389017	1133	2020	108	LinJ.06:390151-390200	66	64	C(21) > G(12) > T(11) > A(6)	-	-	537	537
LINF_060014600	972	393949	393947	44.1358	+	393859	90	140	2	LinJ.06:393950-393999	60	60	C(20) > A(10) > T(10) > G(10)	-	-	-	-
LINF_060014800	1879	402325	402336	20.8089	+	402181	144	525	11	LinJ.06:402326-402375	52	38	A(19) > C(14) > G(12) > T(5)	-	-	400	400
LINF_060014900	257	405451	405413	26.4591	+	404236	1215	1486	38	LinJ.06:405452-405501	74	58	C(21) > G(16) > T(8) > A(5)	-	-	636	636
LINF_060015000	480	409032	409048	18.5417	+	408468	564	1058	16	LinJ.06:409033-409082	54	50	C(16) > A(14) > G(11) > T(9)	-	-	725	-
LINF_060015300	587	417691	417692	14.9915	+	417088	603	654	1	LinJ.06:417692-417741	50	26	G(21) > A(16) > T(9) > C(4)	-	-	-	-
LINF_060015400	289	423518	423517	32.872	+	423362	156	212	1	LinJ.06:423519-423568	56	38	G(16) > A(15) > C(12) > T(7)	-	-	-	-
LINF_060015600	380	433944	433957	11.0526	+	433498	446	509	13	LinJ.06:433945-433994	64	62	C(24) > A(11) > G(8) > T(7)	402	402	286	402
LINF_060015700	1531	434976	434988	13.9778	+	434874	102	170	12	LinJ.06:434977-435026	54	28	G(20) > A(16) > T(7) > C(7)	284	-	-	-
LINF_060015800	479	437018	437209	16.7015	+	436925	93	248	191	LinJ.06:437019-437068	60	50	G(17) > C(13) > T(12) > A(8)	-	-	570	570
LINF_060015900	662	440346	440357	24.6224	+	440141	205	255	11	LinJ.06:440347-440396	58	40	G(17) > A(13) > C(12) > T(8)	361	361	361	361
LINF_060016000	1335	442073	442072	15.9551	+	441482	591	626	1	LinJ.06:442074-442123	56	48	G(14) > C(14) > A(12) > T(10)	-	-	-	-
LINF_060016100	372	445524	445501	21.5054	+	445438	86	27	23	LinJ.06:445525-445574	60	52	C(16) > G(14) > A(10) > T(10)	-	-	-	-
LINF_060016300	2160	449977	450126	18.1481	+	449497	480	1470	149	LinJ.06:449978-450027	70	52	C(20) > G(15) > A(9) > T(6)	469	469	469	469
LINF_060016500	462	456276	456263	16.2338	+	454880	1396	1122	13	LinJ.06:456277-456326	58	64	C(21) > T(11) > A(10) > G(8)	267	-	267	267
LINF_060016600	373	458462	458460	38.874	+	457307	1155	1212	2	LinJ.06:458463-458512	60	46	G(16) > C(14) > A(11) > T(9)	-	-	-	268
LINF_060016800	303	463662	463681	16.1716	+	462758	904	1903	19	LinJ.06:463663-463712	56	40	G(18) > A(12) > T(10) > C(10)	285	285	285	285
LINF_060017000	1255	472273	472177	12.4303	+	471867	406	195	96	LinJ.06:472274-472323	62	52	C(17) > G(14) > A(10) > T(9)	298	298	298	298
LINF_060017200	724	476423	476432	20.0276	+	476363	60	299	9	LinJ.06:476424-476473	58	36	A(16) > G(16) > C(13) > T(5)	296	296	296	296
LINF_060017300	1280	478446	478589	33.5938	+	478374	72	34	143	LinJ.06:478447-478496	58	46	G(18) > T(12) > C(11) > A(9)	345	-	345	-
LINF_060017400	1431	482364	482360	26.7645	+	482192	172	222	4	LinJ.06:482365-482414	60	36	G(18) > A(14) > C(12) > T(6)	394	259	394	394
LINF_060017500	6862	483842	483848	36.0099	+	483261	581	637	6	LinJ.06:483843-483892	50	56	C(15) > T(13) > A(12) > G(10)	330	330	330	330
LINF_060017700	5672	487368	487387	38.3463	+	487187	181	250	19	LinJ.06:487369-487418	44	40	A(17) > G(13) > T(11) > C(9)	315	315	315	315
LINF_060018100	305	495224	495206	20.3279	+	494025	1199	779	18	LinJ.06:495225-495274	66	54	C(22) > A(12) > G(11) > T(5)	-	-	-	258
LINF_060018300	1056	500346	500357	22.822	+	500104	242	70	11	LinJ.06:500347-500396	58	52	C(19) > A(14) > G(10) > T(7)	259	-	259	259
LINF_060018500	4114	503835	503818	16.8935	+	503696	139	173	17	LinJ.06:503836-503885	56	36	A(18) > G(14) > C(14) > T(4)	318	318	318	318
LINF_060018700	4152	506697	506695	40.2938	+	506381	316	1141	2	LinJ.06:506698-506747	62	54	C(22) > A(14) > G(9) > T(5)	-	-	-	-
LINF_060018800	2220	507339	507335	24.5045	-	507904	565	ND	4	LinJ.06:507290-507339	44	36	A(23) > C(13) > G(9) > T(5)	-	-	-	-
LINF_060019000	1134	512864	512919	16.4903	-	513521	657	590	55	LinJ.06:512815-512864	46	56	T(16) > C(12) > A(11) > G(11)	222	222	222	222
LINF_060019200	1370	524063	524060	22.3358	+	522491	1572	ND	3	LinJ.06:524064-524113	60	42	C(17) > A(16) > G(13) > T(4)	-	-	-	-
LINF_070005000	206	4581	4582	22.3301	-	4801	220	ND	1	LinJ.07:4532-4581	58	64	C(24) > A(13) > T(8) > G(5)	197	197	197	203
LINF_070005100	2232	13057	13049	14.5161	+	12986	71	121	8	LinJ.07:13058-13107	44	50	A(15) > T(13) > C(12) > G(10)	317	317	317	317
LINF_070005200	937	14697	14696	25.9338	+	14470	227	534	1	LinJ.07:14698-14747	48	56	T(15) > C(13) > A(11) > G(11)	157	157	157	-
LINF_070005400	332	18326	18323	26.8072	+	18208	118	165	3	LinJ.07:18327-18376	38	30	A(26) > C(10) > G(9) > T(5)	-	-	-	-
LINF_070005500	144	22931	22894	14.5833	+	21694	1237	1184	37	LinJ.07:22932-22981	60	38	G(22) > T(11) > A(9) > C(8)	353	353	353	353
LINF_070005600	1673	24667	24666	20.263	+	24228	439	494	1	LinJ.07:24668-24717	44	36	A(22) > C(12) > G(10) > T(6)	436	436	436	436
LINF_070005700	3377	26089	26088	16.4051	+	25891	198	248	1	LinJ.07:26090-26139	60	62	C(18) > T(13) > G(12) > A(7)	-	-	382	-
LINF_070005900	300	35405	35403	22.6667	+	34062	1343	1393	2	LinJ.07:35406-35455	50	38	A(18) > G(13) > C(12) > T(7)	304	304	304	304
LINF_070006000	779	39742	39741	25.8023	+	39571	171	2285	1	LinJ.07:39743-39792	62	54	G(17) > C(14) > T(13) > A(6)	668	668	281	281
LINF_070006100	644	43990	43978	20.3416	+	43655	335	629	12	LinJ.07:43991-44040	50	46	A(15) > C(13) > G(12) > T(10)	-	-	-	-
LINF_070006200	470	52046	52044	33.1915	+	51794	252	450	2	LinJ.07:52047-52096	64	30	G(22) > A(13) > C(10) > T(5)	484	-	-	484
LINF_070006300	331	54508	54507	26.284	+	54404	104	154	1	LinJ.07:54509-54558	62	62	C(18) > T(13) > G(13) > A(6)	311	311	311	311
LINF_070006400	1245	56370	56377	21.9277	+	56012	358	261	7	LinJ.07:56371-56420	66	62	C(20) > G(13) > T(11) > A(6)	-	-	267	267
LINF_070006500	187	60397	60345	24.0642	+	58689	1708	7	52	LinJ.07:60398-60447	60	54	C(20) > A(13) > G(10) > T(7)	-	-	-	-
LINF_070006600	510	60397	60345	47.6471	+	60135	262	ND	52	LinJ.07:60398-60447	60	54	C(20) > A(13) > G(10) > T(7)	-	-	-	-
LINF_070006700	476	62597	62598	43.2773	-	63027	430	ND	1	LinJ.07:62548-62597	62	46	G(16) > C(15) > A(11) > T(8)	-	-	-	-
LINF_070006800	29	66090	66092	20.6897	-	69970	3880	3710	2	LinJ.07:66041-66090	76	58	G(19) > C(19) > T(10) > A(2)	-	461	461	461
LINF_070007000	82	74766	74770	34.1463	-	74854	88	162	4	LinJ.07:74717-74766	60	58	C(19) > G(11) > A(10) > T(10)	-	-	-	-
LINF_070007100	677	83150	83138	47.1196	-	83445	295	1764	12	LinJ.07:83101-83150	58	52	C(18) > A(13) > G(11) > T(8)	301	264	-	-
LINF_070007200	517	85181	85225	18.5687	-	85824	643	702	44	LinJ.07:85132-85181	48	42	A(20) > C(15) > G(9) > T(6)	401	401	401	401
LINF_070007400	1117	89873	89872	30.8863	-	90340	467	512	1	LinJ.07:89824-89873	64	60	C(22) > A(10) > G(10) > T(8)	381	381	381	381
LINF_070007600	678	93876	93859	23.5988	-	93938	62	129	17	LinJ.07:93827-93876	60	50	C(21) > A(16) > G(9) > T(4)	371	371	371	371
LINF_070007800	685	104548	104539	16.9343	-	105290	742	2240	9	LinJ.07:104499-104548	64	64	C(24) > A(10) > T(8) > G(8)	-	-	-	451
LINF_070008000	296	110169	110231	51.6892	-	110383	214	2	62	LinJ.07:110120-110169	54	44	G(17) > T(12) > A(11) > C(10)	241	241	241	241
LINF_070008100	850	131633	131629	29.2941	-	132460	827	2338	4	LinJ.07:131584-131633	56	42	A(16) > C(15) > G(13) > T(6)	-	-	-	-
LINF_070008300	639	137814	137789	18.3099	-	138455	641	765	25	LinJ.07:137765-137814	62	68	C(19) > T(15) > G(12) > A(4)	-	-	-	-
LINF_070008400	369	141772	141773	24.6612	-	142361	589	696	1	LinJ.07:141723-141772	58	56	G(16) > T(15) > C(13) > A(6)	-	-	-	-
LINF_070008600	766	149972	149976	13.7076	-	150345	373	434	4	LinJ.07:149923-149972	48	46	A(18) > C(15) > G(9) > T(8)	-	-	-	-
LINF_070008900	824	160823	160835	21.966	-	161103	280	332	12	LinJ.07:160774-160823	64	28	G(24) > A(12) > C(8) > T(6)	411	411	411	411
LINF_070009000	1136	163693	163708	15.8451	-	164252	559	595	15	LinJ.07:163644-163693	64	40	G(16) > C(16) > A(14) > T(4)	246	-	246	246
LINF_070009200	555	173659	173642	19.0991	-	173819	160	861	17	LinJ.07:173610-173659	64	44	C(18) > A(14) > G(14) > T(4)	402	402	402	402
LINF_070009300	599	185188	185068	24.5409	-	185490	302	366	120	LinJ.07:185139-185188	56	36	G(19) > A(13) > T(9) > C(9)	-	-	-	-
LINF_070009400	407	188932	188949	12.285	-	189240	308	603	17	LinJ.07:188883-188932	54	58	C(18) > A(12) > T(11) > G(9)	-	-	634	634
LINF_070009600	4008	199220	199084	19.3613	-	199500	280	836	136	LinJ.07:199171-199220	60	54	C(17) > G(13) > A(10) > T(10)	584	584	584	584
LINF_070009700	3841	200342	200351	17.6256	-	200829	487	516	9	LinJ.07:200293-200342	54	62	C(18) > T(13) > A(10) > G(9)	312	312	312	312
LINF_070009900	3646	203274	203273	11.2452	-	203353	79	138	1	LinJ.07:203225-203274	42	48	A(15) > T(14) > G(11) > C(10)	356	356	356	356
LINF_070010000	425	204133	204127	17.4118	-	204678	545	599	6	LinJ.07:204084-204133	48	36	A(18) > G(14) > C(10) > T(8)	233	233	233	233
LINF_070010300	398	231806	231807	33.9196	+	231659	147	682	1	LinJ.07:231807-231856	46	42	A(25) > C(19) > G(4) > T(2)	-	-	-	-
LINF_070010500	24872	237719	237717	35.5983	+	237436	283	493	2	LinJ.07:237720-237769	56	34	G(17) > A(16) > C(11) > T(6)	960	960	809	809
LINF_070010700	636	242305	242308	14.1509	+	241416	889	1853	3	LinJ.07:242306-242355	56	38	G(17) > A(14) > C(11) > T(8)	284	284	284	284
LINF_070011000	171	262679	262785	18.1287	+	262341	338	627	106	LinJ.07:262680-262729	56	48	G(15) > C(13) > A(11) > T(11)	604	604	604	604
LINF_070011100	687	265459	265458	35.5167	+	264342	1117	1167	1	LinJ.07:265460-265509	60	52	C(16) > G(14) > A(10) > T(10)	-	-	390	390
LINF_070011600	774	283874	283897	8.91473	+	283516	358	408	23	LinJ.07:283875-283924	54	54	C(19) > A(15) > T(8) > G(8)	317	317	317	317
LINF_070011700	2433	285329	285323	9.28894	+	285086	243	307	6	LinJ.07:285330-285379	54	48	C(20) > A(19) > G(7) > T(4)	-	-	-	-
LINF_070011800	404	288215	288208	21.2871	+	288024	191	584	7	LinJ.07:288216-288265	56	36	A(18) > G(14) > C(14) > T(4)	371	371	371	371
LINF_070012000	1227	296417	296419	25.9984	+	295916	501	545	2	LinJ.07:296418-296467	62	38	G(17) > A(14) > C(14) > T(5)	-	-	-	-
LINF_070012200	511	308453	308534	23.092	+	307839	614	697	81	LinJ.07:308454-308503	62	54	C(19) > G(12) > A(11) > T(8)	501	501	501	501
LINF_070012300	853	310242	310249	16.061	+	309609	633	683	7	LinJ.07:310243-310292	50	38	G(17) > A(14) > T(11) > C(8)	425	425	422	422
LINF_070012400	14843	311824	311823	26.6388	+	311295	529	1873	1	LinJ.07:311825-311874	50	40	A(19) > C(14) > G(11) > T(6)	-	-	522	522
LINF_070012700	1180	325556	325603	12.8814	+	325055	501	417	47	LinJ.07:325557-325606	52	74	T(21) > C(16) > G(10) > A(3)	-	-	-	-
LINF_070012800	165	329689	329716	16.9697	+	328207	1482	1559	27	LinJ.07:329690-329739	54	48	C(18) > A(17) > G(9) > T(6)	-	-	-	-
LINF_070013100	228	352845	352849	32.0175	+	352342	503	832	4	LinJ.07:352846-352895	48	24	A(23) > G(15) > C(9) > T(3)	-	431	431	431
LINF_070013200	375	354650	355439	11.7333	+	354057	593	2839	789	LinJ.07:354651-354700	36	40	A(22) > T(10) > C(10) > G(8)	-	274	274	274
LINF_070013400	994	362918	362891	15.996	+	362799	119	685	27	LinJ.07:362919-362968	58	32	A(17) > G(17) > C(12) > T(4)	-	-	-	-
LINF_070013500	111	369393	369396	20.7207	+	367971	1422	2846	3	LinJ.07:369394-369443	58	32	G(18) > A(16) > C(11) > T(5)	486	486	486	486
LINF_070013600	128	374405	374464	35.9375	+	373032	1373	2084	59	LinJ.07:374406-374455	60	74	C(21) > T(16) > G(9) > A(4)	576	576	576	576
LINF_070013700	561	377926	377924	25.3119	+	377479	447	37	2	LinJ.07:377927-377976	58	76	T(19) > C(19) > G(10) > A(2)	262	-	262	262
LINF_070013800	414	380024	380026	21.9807	+	379203	821	973	2	LinJ.07:380025-380074	62	52	C(17) > G(14) > A(10) > T(9)	-	-	-	-
LINF_070014200	284	390422	390412	18.662	+	389866	556	902	10	LinJ.07:390423-390472	56	44	A(17) > C(17) > G(11) > T(5)	514	514	514	514
LINF_070014300	1012	392237	392230	9.58498	+	391437	800	3106	7	LinJ.07:392238-392287	46	52	A(14) > T(13) > C(13) > G(10)	-	373	373	373
LINF_070014900	42	449086	447155	23.8095	+	446835	2251	4361	1931	LinJ.07:449087-449136	42	30	A(20) > G(15) > T(9) > C(6)	-	-	-	-
LINF_070015000	145	456785	456771	22.7586	+	456272	513	4664	14	LinJ.07:456786-456835	62	56	C(19) > G(12) > A(10) > T(9)	288	288	288	288
LINF_070015100	51	465424	465427	31.3725	+	463777	1647	3080	3	LinJ.07:465425-465474	46	40	A(17) > G(13) > T(10) > C(10)	410	410	410	410
LINF_070015400	745	479152	479309	11.9463	+	478947	205	1594	157	LinJ.07:479153-479202	54	54	T(15) > G(15) > C(12) > A(8)	-	-	-	-
LINF_070015600	960	490504	490506	23.125	+	489802	702	938	2	LinJ.07:490505-490554	62	68	C(19) > T(15) > G(12) > A(4)	-	-	-	-
LINF_070016000	472	519069	519151	22.6695	+	518539	530	478	82	LinJ.07:519070-519119	50	76	C(20) > T(18) > A(7) > G(5)	78	78	78	322
LINF_070016100	1118	520323	520311	13.7746	+	519828	495	4357	12	LinJ.07:520324-520373	46	24	A(23) > G(15) > C(8) > T(4)	-	-	-	-
LINF_070016300	714	526982	526979	26.6106	+	525889	1093	1129	3	LinJ.07:526983-527032	58	38	G(20) > A(11) > T(10) > C(9)	375	375	375	375
LINF_070016400	1743	528216	528221	18.9902	+	527902	314	362	5	LinJ.07:528217-528266	60	48	C(16) > G(14) > A(12) > T(8)	-	-	-	-
LINF_070016500	369	533458	533205	11.1111	+	532951	507	557	253	LinJ.07:533459-533508	60	32	G(19) > A(15) > C(11) > T(5)	294	289	289	289
LINF_070016700	1379	537303	537301	22.9877	+	537154	149	44	2	LinJ.07:537304-537353	64	54	C(17) > G(15) > T(10) > A(8)	268	268	268	268
LINF_070016800	2885	538455	538453	41.7331	+	538229	226	228	2	LinJ.07:538456-538505	60	58	G(16) > T(15) > C(14) > A(5)	461	461	461	461
LINF_070016900	1739	540818	540810	15.4112	+	540392	426	482	8	LinJ.07:540819-540868	66	56	C(18) > G(15) > T(10) > A(7)	-	-	-	264
LINF_070017000	93	546203	546549	23.6559	+	545127	1076	1344	346	LinJ.07:546204-546253	52	70	C(19) > T(16) > A(8) > G(7)	499	499	499	499
LINF_070017100	4503	547867	547645	13.6131	+	547364	503	353	222	LinJ.07:547868-547917	60	42	G(15) > C(15) > A(14) > T(6)	259	259	259	259
LINF_070017200	1113	549892	549894	41.15	+	549824	68	120	2	LinJ.07:549893-549942	52	38	G(16) > A(15) > C(10) > T(9)	-	355	355	355
LINF_070017500	473	559759	559774	6.34249	+	558679	1080	1305	15	LinJ.07:559760-559809	52	44	A(14) > G(14) > C(12) > T(10)	426	426	426	426
LINF_070017600	1709	561413	561412	41.0767	+	561133	280	258	1	LinJ.07:561414-561463	62	42	G(18) > C(13) > A(11) > T(8)	203	203	203	203
LINF_070017700	3604	562183	562181	20.838	+	562115	68	118	2	LinJ.07:562184-562233	54	46	G(15) > A(12) > C(12) > T(11)	363	363	341	363
LINF_070017900	401	566559	566558	25.187	+	565408	1151	1190	1	LinJ.07:566560-566609	62	30	G(21) > A(14) > C(10) > T(5)	398	398	398	398
LINF_070018000	1977	568638	568636	20.9408	+	568292	346	2080	2	LinJ.07:568639-568688	60	48	C(17) > A(13) > G(13) > T(7)	331	331	331	331
LINF_070018100	1100	572577	572579	36.3636	+	572280	297	349	2	LinJ.07:572578-572627	58	62	C(19) > T(12) > G(10) > A(9)	-	-	305	305
LINF_070018200	311	574949	575260	18.6495	+	573670	1279	2824	311	LinJ.07:574950-574999	52	68	C(18) > T(16) > A(8) > G(8)	548	548	548	133
LINF_070018300	611	584642	584640	46.6448	+	584538	104	93	2	LinJ.07:584643-584692	60	58	C(18) > G(12) > T(11) > A(9)	-	-	463	463
LINF_080005100	802	9439	9451	20.8229	+	8961	478	186	12	LinJ.08:9440-9489	48	68	T(18) > C(16) > A(8) > G(8)	338	338	338	338
LINF_080005400	1940	14825	14811	20	+	14390	435	602	14	LinJ.08:14826-14875	60	40	A(15) > G(15) > C(15) > T(5)	400	400	400	400
LINF_080005500	2287	16645	16641	15.3039	+	16508	137	187	4	LinJ.08:16646-16695	46	50	T(15) > G(13) > A(12) > C(10)	285	285	285	285
LINF_080005600	1127	19286	19283	32.9193	+	19006	280	330	3	LinJ.08:19287-19336	54	32	G(22) > A(12) > T(11) > C(5)	-	-	-	-
LINF_080005900	503	30813	30803	20.8748	+	30416	397	450	10	LinJ.08:30814-30863	56	42	A(15) > G(14) > C(14) > T(7)	-	-	201	-
LINF_080006000	101	34606	33464	16.8317	+	33381	1225	1423	1142	LinJ.08:34607-34656	56	30	G(18) > A(17) > C(10) > T(5)	470	470	470	470
LINF_080006300	1760	45571	45575	14.5455	+	45412	159	402	4	LinJ.08:45572-45621	62	70	C(24) > T(11) > A(8) > G(7)	-	-	-	-
LINF_080006400	718	50301	50299	33.9833	+	50096	205	255	2	LinJ.08:50302-50351	58	30	G(21) > A(14) > C(8) > T(7)	-	259	259	259
LINF_080006600	9286	54742	54745	19.6855	+	54554	188	5029	3	LinJ.08:54743-54792	54	66	C(21) > T(12) > A(11) > G(6)	284	284	284	284
LINF_080006900	119	73936	73931	14.2857	+	73265	671	703	5	LinJ.08:73937-73986	40	66	T(22) > C(11) > G(9) > A(8)	-	-	-	-
LINF_080007100	352	80099	80093	17.8977	+	79949	150	200	6	LinJ.08:80100-80149	56	36	G(19) > A(13) > T(9) > C(9)	-	-	-	-
LINF_080007300	467	87238	87237	25.6959	+	86387	851	902	1	LinJ.08:87239-87288	54	56	T(14) > C(14) > G(13) > A(9)	367	367	292	292
LINF_080007400	1139	88982	88981	46.0931	+	88551	431	119	1	LinJ.08:88983-89032	66	70	C(21) > T(14) > G(12) > A(3)	443	207	207	207
LINF_080007500	2608	90185	90183	21.7408	+	89771	414	614	2	LinJ.08:90186-90235	52	48	A(14) > C(14) > G(12) > T(10)	491	491	491	491
LINF_080007600	694	93169	93170	23.1988	+	92866	303	823	1	LinJ.08:93170-93219	56	28	A(18) > G(18) > C(10) > T(4)	-	-	-	-
LINF_080007700	82	97582	97581	15.8537	+	96716	866	2330	1	LinJ.08:97583-97632	54	56	T(15) > G(14) > C(13) > A(8)	-	-	-	524
LINF_080007800	888	101349	101348	30.9685	+	101047	302	376	1	LinJ.08:101350-101399	54	42	G(15) > A(14) > C(12) > T(9)	308	308	308	308
LINF_080007900	759	103363	103388	15.2833	+	102475	888	1420	25	LinJ.08:103364-103413	68	80	C(29) > T(11) > A(5) > G(5)	915	86	86	915
LINF_080008300	2975	110241	110236	19.4958	+	110149	92	536	5	LinJ.08:110242-110291	48	74	T(21) > C(16) > G(8) > A(5)	-	-	-	-
LINF_080008400	376	126062	126061	21.2766	+	125807	255	319	1	LinJ.08:126063-126112	58	42	G(15) > A(14) > C(14) > T(7)	-	-	284	-
LINF_080008800	653	138975	138976	22.9709	+	138412	563	118	1	LinJ.08:138976-139025	64	48	G(16) > C(16) > A(10) > T(8)	-	-	-	-
LINF_080009000	505	152805	152740	18.4158	+	152684	121	86	65	LinJ.08:152806-152855	56	54	G(17) > T(16) > C(11) > A(6)	-	-	-	-
LINF_080009200	42	164724	164755	21.4286	+	162753	1971	1964	31	LinJ.08:164725-164774	58	56	C(17) > G(12) > T(11) > A(10)	-	-	-	-
LINF_080009300	499	172039	172008	8.81764	+	171422	617	628	31	LinJ.08:172040-172089	58	42	G(15) > A(14) > C(14) > T(7)	-	-	-	-
LINF_080009400	601	176156	176148	21.1314	+	175589	567	627	8	LinJ.08:176157-176206	62	28	G(19) > A(17) > C(12) > T(2)	-	-	-	-
LINF_080009500	518	184229	184404	13.7066	+	184104	125	383	175	LinJ.08:184230-184279	62	22	G(27) > A(12) > T(7) > C(4)	618	618	618	618
LINF_080009700	234	189675	189679	14.5299	+	187359	2316	2371	4	LinJ.08:189676-189725	54	38	A(16) > G(15) > C(12) > T(7)	-	-	-	-
LINF_080009900	1145	194619	194618	18.1659	+	194064	555	83	1	LinJ.08:194620-194669	58	36	A(20) > C(17) > G(12) > T(1)	275	-	192	275
LINF_080010100	655	198700	198699	10.687	+	198373	327	394	1	LinJ.08:198701-198750	54	36	A(19) > C(14) > G(13) > T(4)	-	-	-	-
LINF_080010200	218	202420	202427	16.9725	+	201554	866	1740	7	LinJ.08:202421-202470	50	12	A(23) > G(21) > C(4) > T(2)	-	-	-	-
LINF_080010300	616	210763	210940	24.1883	+	210698	65	461	177	LinJ.08:210764-210813	60	54	G(16) > C(14) > T(13) > A(7)	-	-	-	-
LINF_080010400	497	217644	217637	23.1388	+	217553	91	141	7	LinJ.08:217645-217694	62	56	C(24) > A(15) > G(7) > T(4)	248	248	248	248
LINF_080010500	1467	219789	219788	21.2679	+	219191	598	1995	1	LinJ.08:219790-219839	54	52	C(17) > A(14) > G(10) > T(9)	899	-	-	899
LINF_080010600	85	224442	224208	22.3529	+	223169	1273	766	234	LinJ.08:224443-224492	58	72	C(22) > T(14) > A(7) > G(7)	-	358	358	-
LINF_080010700	222	227039	227041	20.2703	+	226008	1031	1302	2	LinJ.08:227040-227089	40	26	A(24) > G(13) > C(7) > T(6)	697	697	697	697
LINF_080011300	173	244885	244883	9.82659	+	243166	1719	5916	2	LinJ.08:244886-244935	56	44	G(17) > A(11) > T(11) > C(11)	-	-	-	-
LINF_080011400	47	259094	259097	29.7872	+	258011	1083	2350	3	LinJ.08:259095-259144	50	44	A(17) > C(14) > G(11) > T(8)	-	-	-	-
LINF_080011600	383	272995	272967	19.5822	+	270941	2054	4647	28	LinJ.08:272996-273045	40	34	A(26) > C(13) > G(7) > T(4)	358	358	358	358
LINF_080011900	1856	292082	292100	35.722	+	290597	1485	4369	18	LinJ.08:292083-292132	56	32	A(19) > G(15) > C(13) > T(3)	247	-	247	247
LINF_080012400	1920	316056	316074	36.4062	+	314571	1485	3737	18	LinJ.08:316057-316106	56	32	A(19) > G(15) > C(13) > T(3)	234	234	234	234
LINF_080012500	800	321228	321380	12.375	+	320952	276	493	152	LinJ.08:321229-321278	60	38	G(23) > T(12) > A(8) > C(7)	568	-	568	568
LINF_080012600	630	324419	324417	21.9048	+	324140	279	756	2	LinJ.08:324420-324469	54	38	A(17) > G(14) > C(13) > T(6)	184	184	184	184
LINF_080012700	1468	326833	326825	29.7684	+	326393	440	688	8	LinJ.08:326834-326883	64	50	G(21) > T(14) > C(11) > A(4)	-	-	-	-
LINF_080013100	222	351893	351933	18.9189	-	352907	1014	ND	40	LinJ.08:351844-351893	64	40	G(16) > C(16) > A(14) > T(4)	-	-	-	-
LINF_080013400	99	361032	361033	41.4141	-	361430	398	455	1	LinJ.08:360983-361032	66	26	G(27) > A(10) > T(7) > C(6)	-	-	-	-
LINF_080013500	148	367744	367757	22.973	-	367958	214	3803	13	LinJ.08:367695-367744	56	30	G(22) > A(13) > T(9) > C(6)	-	-	-	-
LINF_080013700	1103	376716	376717	27.5612	-	377022	306	381	1	LinJ.08:376667-376716	62	42	G(18) > C(13) > A(11) > T(8)	475	471	471	475
LINF_080013900	1768	384704	384706	19.457	-	384949	245	298	2	LinJ.08:384655-384704	58	46	G(16) > C(13) > A(11) > T(10)	-	-	544	-
LINF_080014000	2750	386156	386155	12.8364	-	386552	396	297	1	LinJ.08:386107-386156	56	38	G(18) > A(13) > C(10) > T(9)	236	236	236	236
LINF_080014100	420	387691	387692	19.5238	-	388482	791	968	1	LinJ.08:387642-387691	56	42	G(16) > A(13) > C(12) > T(9)	515	515	515	515
LINF_080014200	204	391043	391045	10.7843	-	391957	914	971	2	LinJ.08:390994-391043	54	36	G(19) > A(13) > T(10) > C(8)	-	-	-	-
LINF_080014500	741	403796	404304	12.6856	-	404226	430	668	508	LinJ.08:403747-403796	68	52	C(18) > G(16) > A(8) > T(8)	-	-	-	-
LINF_080014600	290	405755	405776	35.1724	-	405921	166	216	21	LinJ.08:405706-405755	72	72	C(28) > T(8) > G(8) > A(6)	-	326	326	326
LINF_080014700	487	415934	415576	14.1684	-	416087	153	7988	358	LinJ.08:415885-415934	56	34	G(23) > T(12) > A(10) > C(5)	531	531	531	531
LINF_080015000	73	420935	420620	16.4384	-	422158	1223	ND	315	LinJ.08:420886-420935	56	76	T(20) > C(18) > G(10) > A(2)	-	-	-	-
LINF_080015600	696	437381	437383	17.8161	-	437452	71	438	2	LinJ.08:437332-437381	64	56	C(20) > G(12) > A(10) > T(8)	-	652	232	232
LINF_080015800	6191	455161	455166	21.7897	+	454712	449	499	5	LinJ.08:455162-455211	56	38	A(20) > C(17) > G(11) > T(2)	410	-	405	410
LINF_080016000	403	458342	458343	11.9107	+	457354	988	1256	1	LinJ.08:458343-458392	46	42	A(15) > G(14) > T(12) > C(9)	-	-	578	-
LINF_080016100	242	462154	462162	23.9669	+	461668	486	989	8	LinJ.08:462155-462204	60	58	C(21) > A(12) > G(9) > T(8)	871	451	451	451
LINF_080016400	509	473784	473783	16.5029	+	473304	480	120	1	LinJ.08:473785-473834	56	56	C(20) > A(14) > T(8) > G(8)	295	295	295	295
LINF_080016500	1067	475938	475808	20.2437	+	475488	450	514	130	LinJ.08:475939-475988	58	46	C(15) > G(14) > A(13) > T(8)	534	534	534	534
LINF_080016600	353	478856	478854	13.881	+	478218	638	688	2	LinJ.08:478857-478906	52	46	G(15) > A(12) > T(12) > C(11)	346	346	346	346
LINF_080016700	1199	480755	480753	18.3486	+	480648	107	157	2	LinJ.08:480756-480805	74	32	G(25) > C(12) > A(9) > T(4)	-	211	211	-
LINF_080016900	676	487199	487198	23.8166	+	486948	251	1730	1	LinJ.08:487200-487249	56	48	C(18) > A(16) > G(10) > T(6)	797	797	797	797
LINF_080017100	1245	494561	494438	12.4498	+	493862	699	624	123	LinJ.08:494562-494611	68	56	C(18) > G(16) > T(10) > A(6)	-	-	323	-
LINF_080017300	5468	499174	499173	30.9071	+	498281	893	954	1	LinJ.08:499175-499224	54	34	A(19) > G(14) > C(13) > T(4)	447	447	447	447
LINF_080017400	1243	501209	501207	53.1778	+	501151	58	108	2	LinJ.08:501210-501259	60	54	G(15) > C(15) > T(12) > A(8)	-	230	230	230
LINF_080017500	1022	503789	503787	26.8102	+	502421	1368	2322	2	LinJ.08:503790-503839	52	64	C(17) > T(15) > A(9) > G(9)	-	-	569	569
LINF_080017600	417	509075	509073	15.8273	+	508179	896	225	2	LinJ.08:509076-509125	52	56	C(20) > A(16) > T(8) > G(6)	282	282	282	282
LINF_080017700	2819	511521	511519	51.3657	+	510765	756	3626	2	LinJ.08:511522-511571	62	44	G(19) > C(12) > T(10) > A(9)	-	-	300	300
LINF_090005000	1463	3995	3996	18.5236	+	3782	213	25	1	LinJ.09:3996-4045	50	24	A(19) > G(19) > T(6) > C(6)	295	295	295	295
LINF_090005200	10813	6622	6618	28.9096	+	6433	189	1012	4	LinJ.09:6623-6672	44	50	A(14) > T(14) > G(11) > C(11)	373	373	373	373
LINF_090005300	755	9695	9691	18.4106	+	9516	179	229	4	LinJ.09:9696-9745	54	32	A(20) > G(14) > C(13) > T(3)	241	241	241	241
LINF_090005400	979	11154	11152	29.1113	+	10923	231	119	2	LinJ.09:11155-11204	62	58	C(16) > G(15) > T(13) > A(6)	344	34	344	344
LINF_090005600	2039	15072	15089	25.0123	+	14919	153	83	17	LinJ.09:15073-15122	52	68	T(17) > C(17) > G(9) > A(7)	361	361	352	361
LINF_090006200	508	53211	53203	22.6378	+	52897	314	378	8	LinJ.09:53212-53261	56	30	A(18) > G(17) > C(11) > T(4)	454	454	454	454
LINF_090006400	135	61572	61561	13.3333	+	60302	1270	1313	11	LinJ.09:61573-61622	46	36	A(16) > G(16) > T(11) > C(7)	-	-	505	505
LINF_090006600	448	65912	65910	43.75	+	65236	676	589	2	LinJ.09:65913-65962	66	56	G(20) > T(15) > C(13) > A(2)	-	-	-	-
LINF_090006800	587	68964	68962	46.3373	+	68288	676	589	2	LinJ.09:68965-69014	66	56	G(20) > T(15) > C(13) > A(2)	-	-	-	-
LINF_090007000	260	72017	72015	43.0769	+	71341	676	589	2	LinJ.09:72018-72067	66	56	G(20) > T(15) > C(13) > A(2)	-	-	-	-
LINF_090007100	147	73608	73606	42.8571	+	72932	676	589	2	LinJ.09:73609-73658	66	56	G(20) > T(15) > C(13) > A(2)	520	520	520	520
LINF_090007200	510	75120	75119	28.6275	+	74552	568	565	1	LinJ.09:75121-75170	60	66	C(20) > T(13) > G(10) > A(7)	-	383	383	383
LINF_090007300	574	76658	76656	43.3798	+	75982	676	589	2	LinJ.09:76659-76708	66	56	G(20) > T(15) > C(13) > A(2)	521	521	521	521
LINF_090007400	555	78128	78124	27.027	+	77567	561	393	4	LinJ.09:78129-78178	68	64	C(19) > G(15) > T(13) > A(3)	328	328	328	328
LINF_090007500	1032	79795	79797	12.7907	+	78964	831	717	2	LinJ.09:79796-79845	54	66	C(21) > T(12) > A(11) > G(6)	216	216	216	216
LINF_090007600	1137	81693	81703	10.9938	+	81677	16	60	10	LinJ.09:81694-81743	58	56	C(20) > A(13) > G(9) > T(8)	350	350	350	350
LINF_090007900	905	90679	90673	19.0055	+	90462	217	1025	6	LinJ.09:90680-90729	46	48	T(16) > G(15) > A(11) > C(8)	-	494	494	494
LINF_090008000	920	95358	95355	35	+	95042	316	366	3	LinJ.09:95359-95408	60	34	A(17) > G(16) > C(14) > T(3)	-	-	-	-
LINF_090008200	1475	100128	100143	17.5593	+	99944	184	1740	15	LinJ.09:100129-100178	62	36	G(22) > A(10) > T(9) > C(9)	321	321	277	321
LINF_090008600	877	115750	115517	14.7092	+	115415	335	89	233	LinJ.09:115751-115800	62	48	C(16) > G(15) > A(11) > T(8)	-	-	-	-
LINF_090008700	496	119532	119538	12.5	+	118905	627	691	6	LinJ.09:119533-119582	40	24	A(26) > G(12) > C(8) > T(4)	-	-	346	-
LINF_090008800	197	124380	124378	16.7513	+	123164	1216	1542	2	LinJ.09:124381-124430	46	42	A(15) > G(14) > T(12) > C(9)	-	-	-	-
LINF_090008900	94	129630	129625	20.2128	+	128276	1354	1411	5	LinJ.09:129631-129680	64	48	C(21) > A(15) > G(11) > T(3)	-	-	-	-
LINF_090009200	535	139366	139365	37.0093	+	139036	330	395	1	LinJ.09:139367-139416	52	44	A(15) > G(13) > C(13) > T(9)	-	-	-	-
LINF_090009300	874	143377	143366	48.5126	+	143063	314	181	11	LinJ.09:143378-143427	54	52	G(15) > T(14) > C(12) > A(9)	239	239	239	239
LINF_090009400	757	144839	144837	27.8732	+	144400	439	489	2	LinJ.09:144840-144889	40	38	A(18) > G(13) > T(12) > C(7)	146	146	146	240
LINF_090009500	955	146200	146199	17.6963	+	145883	317	372	1	LinJ.09:146201-146250	64	40	G(21) > C(11) > A(9) > T(9)	493	493	446	446
LINF_090009600	1301	148125	148058	17.3713	+	147836	289	384	67	LinJ.09:148126-148175	68	74	C(32) > A(11) > T(5) > G(2)	-	308	308	308
LINF_090009700	656	150240	150238	12.0427	+	149893	347	1399	2	LinJ.09:150241-150290	52	46	A(18) > C(17) > G(9) > T(6)	368	368	364	368
LINF_090010200	411	173570	173571	10.9489	+	172852	718	1067	1	LinJ.09:173571-173620	72	46	C(19) > G(17) > A(10) > T(4)	490	-	490	-
LINF_090010300	721	176312	176308	16.5049	+	176073	239	558	4	LinJ.09:176313-176362	64	38	G(16) > C(16) > A(15) > T(3)	-	-	-	-
LINF_090010500	666	190616	190602	39.039	+	190457	159	194	14	LinJ.09:190617-190666	66	54	C(17) > G(16) > T(10) > A(7)	-	-	266	-
LINF_090010600	452	193523	193550	9.95575	+	193415	108	2031	27	LinJ.09:193524-193573	62	80	C(25) > T(15) > G(6) > A(4)	554	554	554	554
LINF_090010700	298	198656	198669	10.7383	+	198221	435	316	13	LinJ.09:198657-198706	52	30	A(18) > G(17) > C(9) > T(6)	287	287	287	287
LINF_090010800	1002	200516	200445	18.1637	+	200363	153	209	71	LinJ.09:200517-200566	64	64	C(23) > A(9) > T(9) > G(9)	-	-	-	-
LINF_090010900	315	206503	206507	34.9206	+	206160	343	67	4	LinJ.09:206504-206553	64	50	C(19) > G(13) > A(12) > T(6)	252	252	252	252
LINF_090011300	172	224590	224587	18.6047	+	223722	868	918	3	LinJ.09:224591-224640	38	54	T(21) > G(13) > A(10) > C(6)	665	665	665	665
LINF_090011500	395	229685	229684	26.3291	+	229152	533	583	1	LinJ.09:229686-229735	58	26	G(19) > A(18) > C(10) > T(3)	-	-	-	243
LINF_090011600	182	233114	233112	30.2198	+	231545	1569	2617	2	LinJ.09:233115-233164	58	34	G(18) > A(15) > C(11) > T(6)	-	-	471	-
LINF_090012000	835	247407	247409	39.521	+	246927	480	532	2	LinJ.09:247408-247457	50	62	C(17) > T(14) > A(11) > G(8)	-	-	-	460
LINF_090012100	445	250550	250552	22.2472	+	250247	303	247	2	LinJ.09:250551-250600	46	72	C(21) > T(15) > A(12) > G(2)	-	-	-	284
LINF_090012200	309	255660	255647	17.7994	+	255211	449	567	13	LinJ.09:255661-255710	60	26	G(20) > A(17) > C(10) > T(3)	324	324	324	324
LINF_090012400	433	261002	261001	26.3279	+	260876	126	80	1	LinJ.09:261003-261052	62	72	C(20) > T(16) > G(11) > A(3)	288	288	467	467
LINF_090012600	1727	263956	263960	15.3445	+	263725	231	19	4	LinJ.09:263957-264006	48	30	A(23) > G(12) > C(12) > T(3)	260	260	260	260
LINF_090012700	2060	265401	265403	33.8835	+	265373	28	80	2	LinJ.09:265402-265451	48	44	A(18) > C(14) > G(10) > T(8)	-	-	-	-
LINF_090013400	1155	278911	278923	18.6147	-	279314	403	859	12	LinJ.09:278862-278911	54	54	C(14) > T(13) > G(13) > A(10)	-	-	-	306
LINF_090013600	372	283201	283204	13.9785	-	283608	407	318	3	LinJ.09:283152-283201	64	82	C(28) > T(13) > A(5) > G(4)	270	270	270	270
LINF_090013700	438	291475	291478	18.7215	-	291951	476	1189	3	LinJ.09:291426-291475	54	52	G(17) > T(16) > C(10) > A(7)	-	-	-	-
LINF_090013800	278	295407	295408	27.6978	-	296010	603	647	1	LinJ.09:295358-295407	62	54	C(19) > G(12) > A(11) > T(8)	-	-	357	357
LINF_090013900	429	313475	313381	18.1818	-	314204	729	1117	94	LinJ.09:313426-313475	64	58	C(20) > G(12) > A(9) > T(9)	-	-	-	-
LINF_090014000	1323	317224	317229	8.84354	-	317766	542	596	5	LinJ.09:317175-317224	58	44	C(17) > A(16) > G(12) > T(5)	-	-	-	-
LINF_090014300	2113	328704	328710	19.2617	-	328818	114	164	6	LinJ.09:328655-328704	52	44	A(16) > C(14) > G(12) > T(8)	-	-	-	-
LINF_090014400	1397	329863	329860	14.1732	-	329971	108	162	3	LinJ.09:329814-329863	50	32	A(22) > C(13) > G(12) > T(3)	398	398	398	398
LINF_090014600	1744	335397	335485	21.789	-	335590	193	294	88	LinJ.09:335348-335397	52	78	T(20) > C(19) > G(7) > A(4)	-	-	-	-
LINF_090014800	2277	338919	338918	23.8472	-	339619	700	751	1	LinJ.09:338870-338919	50	44	A(14) > G(14) > T(11) > C(11)	356	356	356	356
LINF_090015000	668	342823	342822	50.2994	-	343344	521	437	1	LinJ.09:342774-342823	48	48	T(15) > G(15) > A(11) > C(9)	-	261	-	-
LINF_090015100	522	346150	346146	19.5402	-	346344	194	965	4	LinJ.09:346101-346150	56	56	C(19) > A(13) > T(9) > G(9)	-	366	366	366
LINF_090015200	2369	356744	356753	18.1089	-	357292	548	2753	9	LinJ.09:356695-356744	70	68	C(25) > G(10) > T(9) > A(6)	358	358	358	358
LINF_090015400	2487	359883	359881	20.7077	-	360746	863	908	2	LinJ.09:359834-359883	58	38	A(18) > C(16) > G(13) > T(3)	515	626	626	626
LINF_090015700	569	365298	365288	5.79965	-	365709	411	458	10	LinJ.09:365249-365298	58	56	C(19) > A(12) > G(10) > T(9)	432	421	432	432
LINF_090015800	1583	369789	369775	22.8048	-	369836	47	97	14	LinJ.09:369740-369789	54	28	A(19) > G(17) > C(10) > T(4)	-	-	-	-
LINF_090015900	838	372173	371987	17.7804	-	372450	277	324	186	LinJ.09:372124-372173	62	36	G(21) > A(11) > C(10) > T(8)	487	487	487	487
LINF_090016000	2288	375106	375117	14.9913	-	376118	1012	1045	11	LinJ.09:375057-375106	54	38	G(17) > A(14) > C(10) > T(9)	424	424	424	424
LINF_090016050	1196	377801	377802	24.3311	-	378484	683	727	1	LinJ.09:377752-377801	54	50	C(17) > A(15) > G(10) > T(8)	328	333	328	328
LINF_090016200	631	386499	386577	14.897	-	386720	221	1140	78	LinJ.09:386450-386499	52	56	C(16) > A(12) > T(12) > G(10)	522	522	522	522
LINF_090016300	1784	403262	403265	24.4395	-	403298	36	97	3	LinJ.09:403213-403262	40	40	A(20) > T(10) > G(10) > C(10)	-	-	-	-
LINF_090017900	130	428673	428686	15.3846	-	430134	1461	1906	13	LinJ.09:428624-428673	60	40	A(15) > G(15) > C(15) > T(5)	354	354	366	-
LINF_090018100	194	433599	433565	17.5258	-	434572	973	1062	34	LinJ.09:433550-433599	38	38	A(20) > T(11) > G(11) > C(8)	305	305	305	305
LINF_090018200	373	436454	436458	24.6649	-	437003	549	359	4	LinJ.09:436405-436454	58	54	C(15) > G(14) > T(12) > A(9)	-	-	-	-
LINF_090018700	2082	449120	449112	11.8636	-	449515	395	510	8	LinJ.09:449071-449120	50	42	A(22) > C(18) > G(7) > T(3)	621	621	621	576
LINF_090018800	1109	450385	450378	14.6078	-	450725	340	266	7	LinJ.09:450336-450385	50	44	A(18) > C(15) > G(10) > T(7)	246	246	246	246
LINF_090018900	833	452150	452062	17.6471	-	452545	395	385	88	LinJ.09:452101-452150	52	22	G(20) > A(19) > C(6) > T(5)	323	323	323	323
LINF_090019400	1066	472104	472164	21.1069	-	472632	528	87	60	LinJ.09:472055-472104	60	58	C(19) > G(11) > A(10) > T(10)	-	-	-	-
LINF_090019600	1133	480153	480151	22.3301	-	480172	19	58	2	LinJ.09:480104-480153	50	36	A(20) > C(13) > G(12) > T(5)	-	-	-	-
LINF_090019900	1905	499204	499210	11.3386	-	499410	206	1953	6	LinJ.09:499155-499204	58	44	C(16) > A(15) > G(13) > T(6)	242	242	242	242
LINF_090020100	1195	503950	503944	18.9121	-	504253	303	800	6	LinJ.09:503901-503950	44	54	T(22) > G(17) > A(6) > C(5)	-	-	882	882
LINF_090020200	306	506740	506735	9.47712	-	506813	73	1230	5	LinJ.09:506691-506740	52	42	G(17) > A(12) > T(12) > C(9)	1368	1368	1368	1368
LINF_090020300	721	508598	508599	16.9209	-	508953	355	559	1	LinJ.09:508549-508598	46	60	T(18) > C(12) > G(11) > A(9)	-	-	611	611
LINF_090020400	673	511261	511134	18.7221	-	511506	245	205	127	LinJ.09:511212-511261	64	58	C(19) > G(13) > T(10) > A(8)	411	411	411	411
LINF_090020600	2330	515614	515608	11.2876	-	516122	508	473	6	LinJ.09:515565-515614	54	50	C(15) > A(13) > G(12) > T(10)	-	-	252	-
LINF_090020800	282	521919	521909	24.4681	-	522446	527	1039	10	LinJ.09:521870-521919	54	54	C(14) > T(13) > G(13) > A(10)	-	-	-	-
LINF_090020900	26116	525509	525510	50.9075	-	525996	487	769	1	LinJ.09:525460-525509	64	64	C(23) > A(9) > T(9) > G(9)	-	-	506	-
LINF_090021000	643	526687	526689	13.3748	-	527452	765	777	2	LinJ.09:526638-526687	60	42	G(17) > C(13) > A(12) > T(8)	267	267	267	267
LINF_090021100	808	528542	528543	15.099	-	529220	678	873	1	LinJ.09:528493-528542	68	52	C(21) > G(13) > A(11) > T(5)	387	387	387	387
LINF_090021200	827	531073	531055	25.7557	-	531505	432	426	18	LinJ.09:531024-531073	50	46	A(14) > G(13) > C(12) > T(11)	389	389	389	389
LINF_090021400	132	536723	536720	21.9697	-	537769	1046	1101	3	LinJ.09:536674-536723	50	36	A(25) > C(18) > G(7) > T(0)	-	-	-	-
LINF_090021800	1328	547687	547685	17.8464	-	547942	255	100	2	LinJ.09:547638-547687	52	52	T(15) > G(15) > C(11) > A(9)	320	320	320	320
LINF_090022100	2201	556144	556155	14.4025	-	556479	335	391	11	LinJ.09:556095-556144	52	32	A(21) > G(13) > C(13) > T(3)	251	251	251	251
LINF_090022200	4102	557428	557422	27.3281	-	557527	99	155	6	LinJ.09:557379-557428	48	38	A(16) > G(15) > T(10) > C(9)	221	322	322	322
LINF_090022300	3287	558567	558552	30.5141	-	558928	361	411	15	LinJ.09:558518-558567	54	46	G(15) > A(12) > C(12) > T(11)	341	341	341	341
LINF_090022500	3266	563768	564072	13.962	-	564434	666	615	304	LinJ.09:563719-563768	58	48	G(15) > C(14) > A(11) > T(10)	-	-	205	-
LINF_090022700	2815	566755	566777	28.0995	-	566906	151	169	22	LinJ.09:566706-566755	50	36	A(16) > G(16) > T(9) > C(9)	276	276	276	276
LINF_090022900	2026	573594	573591	26.2586	-	573704	110	32	3	LinJ.09:573545-573594	50	30	A(19) > G(16) > C(9) > T(6)	-	-	-	-
LINF_090023000	2189	575038	575040	23.8922	-	575218	180	230	2	LinJ.09:574989-575038	50	50	T(13) > G(13) > A(12) > C(12)	293	293	293	293
LINF_090023100	78	576019	576022	32.0513	-	576189	170	7	3	LinJ.09:575970-576019	40	46	A(15) > T(15) > G(12) > C(8)	204	204	204	204
LINF_090023200	1975	578456	578443	15.8481	-	578653	197	257	13	LinJ.09:578407-578456	32	38	A(21) > T(13) > G(10) > C(6)	-	-	-	-
LINF_100005200	186	10095	10066	17.7419	-	11506	1411	1465	29	LinJ.10:10046-10095	58	38	A(16) > G(15) > C(14) > T(5)	-	-	-	-
LINF_100005400	454	28856	28857	15.4185	+	28711	145	201	1	LinJ.10:28857-28906	50	68	C(19) > T(15) > A(10) > G(6)	-	-	-	-
LINF_100005500	122	31968	31986	29.5082	+	30625	1343	1406	18	LinJ.10:31969-32018	56	28	A(19) > G(17) > C(11) > T(3)	395	397	397	397
LINF_100005700	1002	34489	35356	20.7585	+	34439	50	2953	867	LinJ.10:34490-34539	56	62	T(16) > C(15) > G(13) > A(6)	323	323	323	323
LINF_100005900	652	42152	42155	49.0798	+	41764	388	441	3	LinJ.10:42153-42202	50	34	G(17) > A(16) > T(9) > C(8)	548	548	548	548
LINF_100006300	1038	59103	59083	14.7399	+	58677	426	2888	20	LinJ.10:59104-59153	66	36	G(20) > C(13) > A(12) > T(5)	355	355	355	355
LINF_100006500	93	71025	70171	19.3548	+	69656	1369	3026	854	LinJ.10:71026-71075	60	40	G(18) > A(12) > C(12) > T(8)	656	656	656	656
LINF_100006900	312	82493	82501	8.65385	+	82125	368	426	8	LinJ.10:82494-82543	32	48	A(25) > C(15) > T(9) > G(1)	345	345	345	345
LINF_100007000	1739	84297	84288	13.8585	+	83702	595	1042	9	LinJ.10:84298-84347	60	68	C(19) > T(15) > G(11) > A(5)	-	-	-	-
LINF_100007100	54	87339	87334	22.2222	+	86273	1066	2125	5	LinJ.10:87340-87389	38	56	T(19) > A(12) > G(10) > C(9)	-	-	1366	-
LINF_100007200	200	92333	92332	16.5	+	90007	2326	2306	1	LinJ.10:92334-92383	60	36	G(17) > A(15) > C(13) > T(5)	336	336	336	336
LINF_100007800	720	114061	113924	8.05556	+	113447	614	527	137	LinJ.10:114062-114111	60	76	C(26) > T(12) > A(8) > G(4)	315	315	261	315
LINF_100008000	1003	117502	117500	23.8285	+	116529	973	1023	2	LinJ.10:117503-117552	64	34	A(17) > G(16) > C(16) > T(1)	-	-	349	-
LINF_100008100	1041	121480	121489	29.8751	+	121275	205	253	9	LinJ.10:121481-121530	58	38	G(17) > A(14) > C(12) > T(7)	-	-	-	-
LINF_100008300	657	132511	132710	13.242	+	131745	766	2261	199	LinJ.10:132512-132561	70	42	G(22) > C(13) > T(8) > A(7)	398	398	398	398
LINF_100008500	227	142907	143323	11.4537	+	142432	475	1168	416	LinJ.10:142908-142957	56	54	G(15) > T(14) > C(13) > A(8)	-	-	-	-
LINF_100008800	89	157405	157935	21.3483	+	157148	257	4197	530	LinJ.10:157406-157455	54	58	C(15) > T(14) > G(12) > A(9)	-	-	-	737
LINF_100009300	276	184923	184930	20.6522	+	184377	546	3459	7	LinJ.10:184924-184973	44	34	A(23) > C(12) > G(10) > T(5)	-	-	290	-
LINF_100009400	137	191724	191728	18.2482	+	190450	1274	1328	4	LinJ.10:191725-191774	46	40	A(19) > C(12) > G(11) > T(8)	-	-	-	-
LINF_100009500	204	196046	196043	31.8627	+	194543	1503	1553	3	LinJ.10:196047-196096	58	62	C(21) > A(11) > T(10) > G(8)	-	-	-	-
LINF_100009700	502	202896	202870	12.3506	+	202266	630	713	26	LinJ.10:202897-202946	62	46	G(16) > C(15) > A(11) > T(8)	-	256	256	256
LINF_100009900	286	208735	208743	22.7273	+	207779	956	6370	8	LinJ.10:208736-208785	46	56	T(15) > C(13) > A(12) > G(10)	355	355	624	-
LINF_100010000	1574	215118	215104	9.84752	+	215043	75	2686	14	LinJ.10:215119-215168	58	38	A(17) > C(15) > G(14) > T(4)	-	-	-	-
LINF_100010300	342	229560	229555	20.1754	+	228808	752	697	5	LinJ.10:229561-229610	82	74	C(30) > G(11) > T(7) > A(2)	354	354	354	354
LINF_100010400	327	232597	232592	19.5719	+	231270	1327	45	5	LinJ.10:232598-232647	82	74	C(30) > G(11) > T(7) > A(2)	357	357	357	-
LINF_100010500	327	232597	232592	19.5719	+	231845	752	802	5	LinJ.10:232598-232647	82	74	C(30) > G(11) > T(7) > A(2)	357	357	357	-
LINF_100010700	146	238698	238770	21.2329	+	237946	752	802	72	LinJ.10:238699-238748	82	74	C(30) > G(11) > T(7) > A(2)	357	357	357	357
LINF_100011800	464	299188	299158	20.9052	+	297831	1357	1337	30	LinJ.10:299189-299238	52	38	G(19) > A(12) > T(12) > C(7)	-	-	-	-
LINF_100012000	569	301624	301620	22.4956	-	301891	267	379	4	LinJ.10:301575-301624	62	54	C(19) > G(12) > A(11) > T(8)	-	-	-	-
LINF_100012100	639	305131	305133	16.1189	-	305433	302	164	2	LinJ.10:305082-305131	56	36	G(20) > A(12) > T(10) > C(8)	-	-	-	-
LINF_100012200	243	309572	309551	9.46502	-	310171	599	653	21	LinJ.10:309523-309572	42	28	A(26) > C(11) > G(10) > T(3)	-	-	-	-
LINF_100012300	1056	314148	314149	20.928	-	314283	135	181	1	LinJ.10:314099-314148	50	48	A(15) > C(14) > G(11) > T(10)	-	-	-	-
LINF_100012400	1286	315988	315990	38.4914	-	316197	209	329	2	LinJ.10:315939-315988	54	46	A(14) > C(14) > G(13) > T(9)	342	242	242	242
LINF_100012500	456	317857	317762	29.8246	-	318121	264	303	95	LinJ.10:317808-317857	56	60	T(16) > G(14) > C(14) > A(6)	319	319	319	319
LINF_100012700	3315	323143	323145	56.4706	-	323209	66	116	2	LinJ.10:323094-323143	50	44	A(14) > G(14) > T(11) > C(11)	-	-	-	-
LINF_100012800	778	324232	324228	28.9203	-	324313	81	5	4	LinJ.10:324183-324232	42	40	A(15) > G(15) > T(14) > C(6)	213	196	213	213
LINF_100012900	1744	332441	332442	23.1078	-	332615	174	6148	1	LinJ.10:332392-332441	40	48	T(16) > A(14) > G(12) > C(8)	-	-	-	-
LINF_100013100	53	339410	339855	37.7358	-	340367	957	1015	445	LinJ.10:339361-339410	38	44	A(23) > C(14) > T(8) > G(5)	500	500	500	500
LINF_100013200	1545	343253	343255	32.2977	-	343704	451	910	2	LinJ.10:343204-343253	46	36	G(17) > A(15) > T(12) > C(6)	-	-	409	-
LINF_100013300	1106	344965	344968	10.9403	-	345391	426	176	3	LinJ.10:344916-344965	58	54	G(18) > T(16) > C(11) > A(5)	229	229	229	229
LINF_100013600	538	358321	358389	15.9851	-	358785	464	16	68	LinJ.10:358272-358321	62	52	G(16) > C(15) > T(11) > A(8)	-	-	337	-
LINF_100013700	617	361319	361323	17.6661	-	361422	103	354	4	LinJ.10:361270-361319	58	64	C(17) > T(15) > G(12) > A(6)	338	338	338	338
LINF_100013800	808	367131	367133	46.4109	-	367319	188	474	2	LinJ.10:367082-367131	48	26	A(22) > G(15) > C(9) > T(4)	-	-	-	-
LINF_100013850	336	370383	370384	40.1786	-	371652	1269	804	1	LinJ.10:370334-370383	60	50	C(17) > G(13) > A(12) > T(8)	-	-	-	-
LINF_100014500	113	397876	397878	18.5841	-	398790	914	1480	2	LinJ.10:397827-397876	66	44	C(19) > A(14) > G(14) > T(3)	537	537	537	537
LINF_100014600	1164	401679	401678	28.1787	-	401996	317	997	1	LinJ.10:401630-401679	52	48	G(16) > T(14) > A(10) > C(10)	411	-	-	411
LINF_100014700	305	403234	403229	25.9016	-	403611	377	420	5	LinJ.10:403185-403234	50	50	T(13) > G(13) > A(12) > C(12)	349	349	349	349
LINF_100014800	113	408367	408377	15.0442	-	409065	698	1197	10	LinJ.10:408318-408367	54	32	G(19) > A(15) > T(8) > C(8)	-	-	-	-
LINF_100014900	1280	416687	416506	6.79687	-	416837	150	1354	181	LinJ.10:416638-416687	58	40	G(21) > T(12) > A(9) > C(8)	-	-	537	-
LINF_100015000	700	418982	418988	25.8571	-	419030	48	296	6	LinJ.10:418933-418982	66	66	C(27) > A(11) > T(6) > G(6)	404	404	404	404
LINF_100015100	344	425348	425349	13.3721	-	426034	686	733	1	LinJ.10:425299-425348	48	34	A(19) > G(14) > C(10) > T(7)	-	-	-	-
LINF_100015200	2620	428460	428453	22.5954	-	428969	509	421	7	LinJ.10:428411-428460	62	42	C(16) > G(15) > A(14) > T(5)	-	-	-	-
LINF_100015300	427	430049	430059	17.5644	-	430511	462	512	10	LinJ.10:430000-430049	58	44	C(16) > A(15) > G(13) > T(6)	545	545	545	545
LINF_100015400	3758	431673	431672	26.7429	-	432074	401	460	1	LinJ.10:431624-431673	72	36	G(20) > C(16) > A(12) > T(2)	450	450	450	450
LINF_100015600	1123	437252	437258	26.8923	-	437645	393	516	6	LinJ.10:437203-437252	60	58	G(15) > C(15) > T(14) > A(6)	-	-	-	-
LINF_100015900	304	446859	447056	13.4868	-	448293	1434	1417	197	LinJ.10:446810-446859	68	66	C(24) > G(10) > T(9) > A(7)	428	-	428	-
LINF_100016000	338	449538	449537	26.0355	-	449680	142	310	1	LinJ.10:449489-449538	56	56	C(17) > A(11) > T(11) > G(11)	-	-	209	209
LINF_100016100	55	449538	449537	30.9091	-	451210	1672	50	1	LinJ.10:449489-449538	56	56	C(17) > A(11) > T(11) > G(11)	-	-	209	209
LINF_100016600	533	461712	461711	27.0169	-	462200	488	315	1	LinJ.10:461663-461712	56	66	T(17) > C(16) > G(12) > A(5)	322	322	322	322
LINF_100016800	3147	468453	468444	33.4604	-	469169	716	775	9	LinJ.10:468404-468453	48	36	A(18) > G(14) > C(10) > T(8)	-	-	-	-
LINF_100017000	22789	473905	473908	21.1593	-	474582	677	614	3	LinJ.10:473856-473905	60	46	G(17) > C(13) > A(10) > T(10)	-	-	439	439
LINF_100017100	741	475402	475312	18.6235	-	475471	69	121	90	LinJ.10:475353-475402	70	54	C(23) > G(12) > A(11) > T(4)	317	317	348	348
LINF_100017200	263	477125	477124	34.6008	-	478037	912	958	1	LinJ.10:477076-477125	52	42	A(15) > G(14) > C(12) > T(9)	-	-	337	337
LINF_100017500	442	485099	485106	21.4932	-	485761	662	712	7	LinJ.10:485050-485099	50	24	G(20) > A(18) > T(7) > C(5)	-	-	-	360
LINF_100017600	4102	489858	489847	15.1633	-	489983	125	175	11	LinJ.10:489809-489858	54	38	A(18) > C(14) > G(13) > T(5)	-	-	-	-
LINF_100018300	2019	507941	507934	26.1516	-	508400	459	539	7	LinJ.10:507892-507941	50	26	A(19) > G(18) > C(7) > T(6)	-	-	-	384
LINF_100018500	1672	512225	512220	28.5885	-	512614	389	642	5	LinJ.10:512176-512225	62	36	G(17) > A(15) > C(14) > T(4)	482	482	482	482
LINF_100018600	611	513583	513752	15.5483	-	514155	572	613	169	LinJ.10:513534-513583	58	44	G(15) > C(14) > A(13) > T(8)	364	364	364	364
LINF_100018800	633	522700	522698	16.2717	-	522993	293	346	2	LinJ.10:522651-522700	54	18	A(22) > G(19) > C(8) > T(1)	-	258	588	588
LINF_100019000	346	528489	528356	14.1618	-	529333	844	1031	133	LinJ.10:528440-528489	44	58	T(22) > G(15) > C(7) > A(6)	-	-	520	-
LINF_100019200	663	533223	533225	24.5852	-	534389	1166	1216	2	LinJ.10:533174-533223	60	46	G(15) > C(15) > A(12) > T(8)	431	-	431	-
LINF_100019300	698	536386	536392	11.6046	-	536828	442	486	6	LinJ.10:536337-536386	56	36	A(16) > G(16) > C(12) > T(6)	-	-	-	-
LINF_100019500	1025	543265	543277	19.8049	-	543538	273	444	12	LinJ.10:543216-543265	54	58	C(18) > A(12) > T(11) > G(9)	625	625	625	625
LINF_100019700	4947	547748	547751	23.3071	-	547918	170	209	3	LinJ.10:547699-547748	44	46	T(16) > G(15) > A(12) > C(7)	287	287	287	287
LINF_100020200	816	553498	553497	14.4608	+	553489	9	8	1	LinJ.10:553499-553548	44	40	A(17) > G(13) > T(11) > C(9)	-	-	-	-
LINF_100020300	159	556067	555282	30.8176	+	555199	868	1290	785	LinJ.10:556068-556117	50	42	A(16) > G(13) > C(12) > T(9)	-	-	-	-
LINF_100020600	409	566110	566113	17.6039	+	565955	155	646	3	LinJ.10:566111-566160	60	36	A(17) > G(15) > C(15) > T(3)	-	865	858	865
LINF_100020700	272	568394	568392	34.9265	+	568104	290	168	2	LinJ.10:568395-568444	48	72	T(20) > C(16) > G(8) > A(6)	-	-	-	-
LINF_100021000	160	578309	578334	11.875	+	576899	1410	1464	25	LinJ.10:578310-578359	58	38	A(16) > G(15) > C(14) > T(5)	-	-	-	-
LINF_110005400	965	11397	11401	17.2021	+	11209	188	238	4	LinJ.11:11398-11447	50	34	G(18) > A(15) > T(10) > C(7)	-	-	-	-
LINF_110005500	453	16270	15528	21.4128	+	15527	743	47	742	LinJ.11:16271-16320	42	36	A(19) > G(13) > T(10) > C(8)	-	-	-	-
LINF_110005800	655	26533	26461	16.3359	+	26119	414	393	72	LinJ.11:26534-26583	64	42	G(17) > C(15) > A(12) > T(6)	372	372	372	372
LINF_110006000	1247	31295	31296	12.5902	+	31183	112	160	1	LinJ.11:31296-31345	44	48	T(16) > G(14) > A(12) > C(8)	-	-	295	295
LINF_110006300	837	37875	37889	33.9307	+	37443	432	482	14	LinJ.11:37876-37925	60	28	G(20) > A(16) > C(10) > T(4)	-	-	-	-
LINF_110006500	615	46552	46537	23.7398	+	46318	234	294	15	LinJ.11:46553-46602	64	52	G(17) > C(15) > T(11) > A(7)	-	-	305	-
LINF_110006600	437	49295	49293	18.9931	+	49099	196	259	2	LinJ.11:49296-49345	58	44	C(16) > A(15) > G(13) > T(6)	347	347	347	-
LINF_110006700	978	50753	50763	23.4151	+	50315	438	488	10	LinJ.11:50754-50803	54	32	A(19) > G(15) > C(12) > T(4)	340	-	340	340
LINF_110006800	645	53344	53345	21.3953	+	52945	399	221	1	LinJ.11:53345-53394	48	48	T(16) > G(16) > A(10) > C(8)	329	329	329	329
LINF_110006900	1977	54558	54555	20.7385	+	54260	298	150	3	LinJ.11:54559-54608	56	50	G(15) > C(13) > T(12) > A(10)	332	-	332	332
LINF_110007000	599	56627	57590	7.51252	+	56523	104	3586	963	LinJ.11:56628-56677	44	60	T(23) > G(15) > C(7) > A(5)	319	192	319	319
LINF_110007100	3915	60807	60808	18.8506	+	60781	26	77	1	LinJ.11:60808-60857	40	32	A(21) > G(13) > T(9) > C(7)	320	320	320	320
LINF_110007200	1212	63011	63211	11.9637	+	62976	35	291	200	LinJ.11:63012-63061	70	68	C(22) > G(13) > T(12) > A(3)	501	501	501	501
LINF_110007400	221	70017	70013	17.6471	+	68987	1030	1106	4	LinJ.11:70018-70067	52	40	A(16) > G(14) > C(12) > T(8)	-	271	271	271
LINF_110007500	1157	73032	73031	37.5108	+	72685	347	181	1	LinJ.11:73033-73082	56	56	C(17) > A(11) > T(11) > G(11)	-	-	-	-
LINF_110007600	66	76443	76451	28.7879	+	74692	1751	1876	8	LinJ.11:76444-76493	58	60	C(17) > T(13) > G(12) > A(8)	-	-	399	-
LINF_110007800	1326	82649	82644	28.733	+	82190	459	376	5	LinJ.11:82650-82699	60	34	G(21) > A(12) > C(9) > T(8)	297	322	295	295
LINF_110007900	1766	83985	83984	35.9003	+	83821	164	214	1	LinJ.11:83986-84035	62	62	C(24) > A(12) > T(7) > G(7)	-	-	-	-
LINF_110008000	194	90895	90894	17.0103	+	90419	476	3777	1	LinJ.11:90896-90945	60	46	G(15) > C(15) > A(12) > T(8)	437	436	437	437
LINF_110008100	446	99259	99256	34.3049	+	98984	275	2049	3	LinJ.11:99260-99309	56	40	A(18) > C(16) > G(12) > T(4)	-	-	352	352
LINF_110008400	217	111166	111163	17.5115	+	109713	1453	1503	3	LinJ.11:111167-111216	54	56	C(17) > A(12) > T(11) > G(10)	366	366	366	366
LINF_110008700	206	122211	122134	29.1262	+	121418	793	763	77	LinJ.11:122212-122261	68	72	C(28) > A(8) > T(8) > G(6)	-	-	-	281
LINF_110008800	424	125293	125292	26.6509	+	124475	818	3083	1	LinJ.11:125294-125343	44	66	T(20) > C(13) > G(9) > A(8)	-	-	435	438
LINF_110008900	45	133601	133610	28.8889	+	132137	1464	1514	9	LinJ.11:133602-133651	50	48	A(14) > C(13) > G(12) > T(11)	-	-	-	-
LINF_110009100	588	140599	140590	19.3878	+	140213	386	436	9	LinJ.11:140600-140649	56	38	G(17) > A(14) > C(11) > T(8)	-	-	348	348
LINF_110009200	739	143816	143815	37.7537	+	143626	190	241	1	LinJ.11:143817-143866	52	34	G(17) > A(16) > C(9) > T(8)	-	-	312	-
LINF_110009300	386	146786	146789	15.0259	+	146512	274	308	3	LinJ.11:146787-146836	50	58	C(16) > T(13) > A(12) > G(9)	413	-	-	413
LINF_110009500	1028	152175	152170	16.3424	+	151996	179	229	5	LinJ.11:152176-152225	50	36	A(16) > G(16) > T(9) > C(9)	353	353	353	353
LINF_110009600	839	155068	155067	25.0298	+	154840	228	712	1	LinJ.11:155069-155118	52	50	G(17) > T(16) > C(9) > A(8)	-	-	231	231
LINF_110010600	845	172038	172028	16.9231	+	171803	235	539	10	LinJ.11:172039-172088	56	46	G(14) > C(14) > A(13) > T(9)	261	261	261	261
LINF_110010700	2163	173117	173120	14.1933	+	172813	304	2256	3	LinJ.11:173118-173167	34	34	A(25) > C(9) > T(8) > G(8)	-	-	-	-
LINF_110010800	104	178251	178259	18.2692	+	177472	779	2724	8	LinJ.11:178252-178301	40	72	T(24) > C(12) > G(8) > A(6)	934	934	931	931
LINF_110010900	652	182859	182868	10.5828	+	182818	41	1210	9	LinJ.11:182860-182909	46	42	A(16) > G(13) > T(11) > C(10)	142	142	142	142
LINF_110011000	561	186803	186806	29.59	+	186564	239	296	3	LinJ.11:186804-186853	54	32	A(19) > G(15) > C(12) > T(4)	352	352	352	352
LINF_110011600	740	214495	214503	9.86486	+	214289	206	430	8	LinJ.11:214496-214545	60	52	G(18) > T(14) > C(12) > A(6)	-	616	616	616
LINF_110011700	921	217472	217465	13.5722	+	217053	419	8131	7	LinJ.11:217473-217522	64	54	C(20) > G(12) > A(11) > T(7)	-	866	640	866
LINF_110012100	245	246982	246985	37.551	+	246531	451	1600	3	LinJ.11:246983-247032	50	50	A(17) > C(17) > T(8) > G(8)	359	359	359	359
LINF_110012300	378	257352	257354	20.8995	+	256633	719	1343	2	LinJ.11:257353-257402	50	60	T(17) > C(13) > G(12) > A(8)	-	-	-	-
LINF_110012700	772	273099	273156	25.9067	+	272359	740	1382	57	LinJ.11:273100-273149	60	68	C(19) > T(15) > G(11) > A(5)	-	-	-	381
LINF_110012900	124	282412	282414	18.5484	+	280819	1593	2161	2	LinJ.11:282413-282462	58	36	A(18) > C(15) > G(14) > T(3)	-	-	-	-
LINF_110013000	735	287781	287851	11.5646	+	287493	288	344	70	LinJ.11:287782-287831	54	44	A(15) > C(14) > G(13) > T(8)	-	-	415	415
LINF_110013300	16283	294776	294781	21.6361	+	294095	681	745	5	LinJ.11:294777-294826	42	34	A(24) > C(12) > G(9) > T(5)	467	467	467	467
LINF_110013400	987	297712	297715	16.3121	+	295836	1876	1926	3	LinJ.11:297713-297762	54	36	A(20) > C(15) > G(12) > T(3)	473	473	473	498
LINF_110013600	4775	301111	301114	13.2775	+	301004	107	158	3	LinJ.11:301112-301161	54	40	G(17) > A(13) > T(10) > C(10)	-	-	-	-
LINF_110013700	220	305678	305652	12.2727	+	304634	1044	1549	26	LinJ.11:305679-305728	44	52	A(15) > T(13) > C(13) > G(9)	-	-	-	-
LINF_110013900	60	320368	319559	15	+	318784	1584	1627	809	LinJ.11:320369-320418	28	40	A(21) > T(15) > G(9) > C(5)	495	495	495	495
LINF_110014100	813	327081	326825	19.4342	+	326454	627	321	256	LinJ.11:327082-327131	52	66	T(21) > G(14) > C(12) > A(3)	-	-	-	-
LINF_110014400	838	347402	347399	22.5537	+	346628	774	725	3	LinJ.11:347403-347452	62	70	C(20) > T(15) > G(11) > A(4)	325	325	316	325
LINF_110014600	489	354751	354890	23.5174	+	354062	689	885	139	LinJ.11:354752-354801	60	54	C(17) > G(13) > A(10) > T(10)	583	583	583	583
LINF_110014700	676	356764	356755	19.9704	+	356019	745	795	9	LinJ.11:356765-356814	56	36	A(19) > C(15) > G(13) > T(3)	-	-	-	-
LINF_110014800	261	362694	362686	20.6897	+	362450	244	294	8	LinJ.11:362695-362744	48	48	A(14) > T(12) > G(12) > C(12)	-	-	-	-
LINF_110014900	330	365645	365709	13.6364	+	364966	679	2241	64	LinJ.11:365646-365695	60	46	C(16) > G(14) > A(13) > T(7)	-	-	-	-
LINF_110015300	572	369767	369649	12.0629	+	369196	571	2326	118	LinJ.11:369768-369817	52	52	T(13) > G(13) > C(13) > A(11)	-	-	-	-
LINF_110015400	75	375923	375922	17.3333	+	374785	1138	1984	1	LinJ.11:375924-375973	40	44	A(17) > T(13) > G(11) > C(9)	-	-	533	533
LINF_110015700	39075	383239	383244	17.405	+	382792	447	508	5	LinJ.11:383240-383289	36	20	A(28) > G(12) > C(6) > T(4)	452	452	452	452
LINF_110015900	127	390984	390887	18.8976	+	390023	961	2294	97	LinJ.11:390985-391034	50	38	A(16) > G(15) > C(10) > T(9)	461	461	461	-
LINF_110017000	194	444459	444470	19.0722	+	443231	1228	1527	11	LinJ.11:444460-444509	50	46	A(16) > C(14) > G(11) > T(9)	-	-	-	-
LINF_110017400	1790	456416	456419	21.2849	+	456002	414	455	3	LinJ.11:456417-456466	54	30	A(21) > G(14) > C(13) > T(2)	602	272	602	602
LINF_110017700	573	468201	468198	18.6736	+	467169	1032	566	3	LinJ.11:468202-468251	42	24	A(25) > G(13) > C(8) > T(4)	445	445	445	445
LINF_110017800	1141	470631	470621	25.7669	+	470376	255	2092	10	LinJ.11:470632-470681	68	54	C(21) > G(13) > A(10) > T(6)	291	291	291	291
LINF_110018000	682	477580	477579	11.8768	+	477221	359	406	1	LinJ.11:477581-477630	56	36	A(18) > G(14) > C(14) > T(4)	547	547	547	547
LINF_110018200	1396	495424	495421	28.1519	+	495187	237	912	3	LinJ.11:495425-495474	66	38	G(20) > C(13) > A(11) > T(6)	-	433	-	-
LINF_110018400	2109	517143	517142	27.3115	+	516694	449	493	1	LinJ.11:517144-517193	58	38	G(17) > A(14) > C(12) > T(7)	-	-	-	-
LINF_110018600	3193	530544	530547	30.4103	+	530371	173	1052	3	LinJ.11:530545-530594	52	46	A(17) > C(16) > G(10) > T(7)	-	-	-	-
LINF_110018800	2481	541442	541446	22.7328	+	541200	242	296	4	LinJ.11:541443-541492	52	38	A(19) > C(14) > G(12) > T(5)	383	383	383	383
LINF_110018900	1627	543609	543620	18.3159	+	543335	274	129	11	LinJ.11:543610-543659	52	46	G(14) > A(13) > C(12) > T(11)	462	462	462	462
LINF_110019000	351	546099	546091	17.9487	+	545504	595	508	8	LinJ.11:546100-546149	70	56	G(18) > C(17) > T(11) > A(4)	-	-	-	-
LINF_110019200	494	556320	553427	7.48988	+	555086	1234	1636	2893	LinJ.11:556321-556370	54	34	G(17) > A(16) > C(10) > T(7)	420	420	420	420
LINF_110019300	1670	558166	558208	24.2515	+	557823	343	382	42	LinJ.11:558167-558216	46	52	A(14) > T(13) > C(13) > G(10)	321	321	321	321
LINF_110019400	1528	560220	560223	13.9398	+	559952	268	1763	3	LinJ.11:560221-560270	40	32	A(24) > G(10) > C(10) > T(6)	469	463	469	463
LINF_110019500	1116	564120	564114	17.6523	+	563907	213	255	6	LinJ.11:564121-564170	42	44	A(17) > T(12) > G(11) > C(10)	323	323	323	323
LINF_110019600	4895	564742	564747	23.2686	+	564730	12	ND	5	LinJ.11:564743-564792	52	52	T(14) > G(14) > C(12) > A(10)	300	300	300	300
LINF_110019700	566	566376	566379	22.7915	+	566300	76	ND	3	LinJ.11:566377-566426	52	56	C(17) > A(13) > T(11) > G(9)	-	-	-	-
LINF_120005000	2194	3772	3835	19.052	+	3675	97	286	63	LinJ.12:3773-3822	50	58	C(15) > T(14) > A(11) > G(10)	243	243	243	243
LINF_120005300	1347	8129	8128	27.9881	+	8013	116	46	1	LinJ.12:8130-8179	58	44	G(19) > T(12) > C(10) > A(9)	306	348	348	348
LINF_120005400	5047	8966	8959	16.6436	+	8932	34	90	7	LinJ.12:8967-9016	38	46	A(17) > T(14) > G(10) > C(9)	279	279	279	279
LINF_120005700	394	15713	15712	27.1574	+	14559	1154	305	1	LinJ.12:15714-15763	58	58	T(16) > G(16) > C(13) > A(5)	288	288	288	288
LINF_120005800	1257	15713	15712	52.8242	+	15579	134	46	1	LinJ.12:15714-15763	58	58	T(16) > G(16) > C(13) > A(5)	288	288	288	288
LINF_120005900	1043	16963	16962	23.7776	+	16690	273	235	1	LinJ.12:16964-17013	52	48	G(17) > T(15) > A(9) > C(9)	254	254	254	-
LINF_120006000	398	20411	19138	18.8442	+	18695	1716	1363	1273	LinJ.12:20412-20461	52	54	C(14) > T(13) > G(12) > A(11)	365	-	365	365
LINF_120006100	553	22783	22769	16.4557	+	21751	1032	1082	14	LinJ.12:22784-22833	58	44	C(16) > A(15) > G(13) > T(6)	-	-	-	-
LINF_120006400	199	37624	37622	15.0754	+	37130	494	2274	2	LinJ.12:37625-37674	74	64	C(24) > G(13) > T(8) > A(5)	645	645	645	645
LINF_120006500	1159	41605	41602	27.61	+	41307	298	2078	3	LinJ.12:41606-41655	64	54	C(18) > G(14) > A(9) > T(9)	-	-	-	-
LINF_120006800	671	53635	53268	27.8689	+	53496	139	202	367	LinJ.12:53636-53685	52	28	G(20) > A(16) > T(8) > C(6)	-	-	-	-
LINF_120007000	555	62952	62964	37.2973	+	62812	140	1359	12	LinJ.12:62953-63002	64	24	G(24) > A(14) > C(8) > T(4)	322	322	322	322
LINF_120007100	214	69489	69486	16.3551	+	68674	815	1193	3	LinJ.12:69490-69539	48	56	C(17) > A(15) > T(11) > G(7)	622	622	622	622
LINF_120007200	795	71883	71882	22.5157	+	71642	241	395	1	LinJ.12:71884-71933	54	60	T(18) > G(15) > C(12) > A(5)	503	503	503	503
LINF_120007400	638	79360	79347	26.489	+	79233	127	177	13	LinJ.12:79361-79410	66	50	C(18) > G(15) > A(10) > T(7)	-	-	181	-
LINF_120007800	791	101565	101651	18.9633	+	101311	254	304	86	LinJ.12:101566-101615	58	40	A(17) > C(16) > G(13) > T(4)	-	-	-	-
LINF_120008000	703	113923	113937	12.66	+	113902	21	82	14	LinJ.12:113924-113973	62	52	C(18) > G(13) > A(11) > T(8)	-	-	-	-
LINF_120008100	702	120046	120033	18.9459	+	120002	44	94	13	LinJ.12:120047-120096	54	38	G(19) > A(12) > T(11) > C(8)	-	372	372	348
LINF_120008500	132	147789	147668	12.8788	+	146414	1375	1857	121	LinJ.12:147790-147839	52	44	A(16) > C(14) > G(12) > T(8)	337	337	337	337
LINF_120008800	1807	157129	157128	22.2468	+	156895	234	5477	1	LinJ.12:157130-157179	66	66	C(28) > A(12) > T(5) > G(5)	375	375	375	-
LINF_120009000	806	169795	169792	8.06452	+	169718	77	825	3	LinJ.12:169796-169845	54	66	C(19) > T(14) > A(9) > G(8)	178	178	146	154
LINF_120009200	520	174631	174628	44.6154	-	174730	99	ND	3	LinJ.12:174582-174631	54	40	A(18) > C(15) > G(12) > T(5)	-	-	-	-
LINF_120009300	1831	176597	176652	42.0535	-	177601	1004	926	55	LinJ.12:176548-176597	52	62	T(21) > G(16) > C(10) > A(3)	329	329	329	329
LINF_120009500	478	180808	180802	20.7113	-	181004	196	2353	6	LinJ.12:180759-180808	46	66	T(20) > C(13) > G(10) > A(7)	287	283	283	283
LINF_120009600	998	183663	183664	12.2244	-	184062	399	446	1	LinJ.12:183614-183663	50	42	A(15) > G(14) > C(11) > T(10)	417	-	417	417
LINF_120010400	92	275895	275897	27.1739	-	276807	912	4022	2	LinJ.12:275846-275895	50	44	A(15) > G(13) > C(12) > T(10)	-	-	-	-
LINF_120010500	3229	290635	290631	37.5348	+	290445	190	233	4	LinJ.12:290636-290685	38	56	T(18) > A(13) > C(10) > G(9)	227	227	195	195
LINF_120010600	1036	293405	293376	13.9961	+	292812	593	649	29	LinJ.12:293406-293455	48	38	A(18) > G(13) > C(11) > T(8)	288	288	288	288
LINF_120010700	3761	294591	294590	40.9466	+	294350	241	2964	1	LinJ.12:294592-294641	52	50	G(15) > T(14) > C(11) > A(10)	-	282	282	-
LINF_120010800	140	300295	300297	14.2857	+	299665	630	2885	2	LinJ.12:300296-300345	44	28	A(27) > C(13) > G(9) > T(1)	499	499	499	499
LINF_120011100	81	326996	327251	20.9877	+	326061	935	1183	255	LinJ.12:326997-327046	60	72	C(23) > T(13) > A(7) > G(7)	-	498	448	448
LINF_120011200	732	329814	329811	20.082	+	329436	378	430	3	LinJ.12:329815-329864	60	32	G(19) > A(15) > C(11) > T(5)	-	-	614	-
LINF_120011300	605	334074	334076	19.3388	+	333863	211	830	2	LinJ.12:334075-334124	54	40	G(18) > A(12) > T(11) > C(9)	-	-	-	-
LINF_120011500	569	342560	342547	12.8295	+	342068	492	2464	13	LinJ.12:342561-342610	58	36	A(17) > G(15) > C(14) > T(4)	-	-	-	-
LINF_120011700	614	351195	351480	12.0521	+	350975	220	1157	285	LinJ.12:351196-351245	38	38	T(18) > G(18) > A(13) > C(1)	-	-	-	-
LINF_120011900	572	362885	362881	21.8531	+	361373	1512	1564	4	LinJ.12:362886-362935	56	42	G(15) > A(14) > C(13) > T(8)	449	449	449	449
LINF_120012000	1795	365508	365417	16.7131	+	365057	451	9	91	LinJ.12:365509-365558	70	68	C(26) > G(9) > T(8) > A(7)	351	351	351	351
LINF_120012200	417	370736	370697	11.271	+	370254	482	595	39	LinJ.12:370737-370786	74	66	C(28) > G(9) > A(8) > T(5)	714	714	714	714
LINF_120012350	542	373725	373744	26.5683	+	372830	895	959	19	LinJ.12:373726-373775	74	56	C(23) > G(14) > A(8) > T(5)	-	-	-	-
LINF_120013700	258	427423	428897	22.093	+	426861	562	2096	1474	LinJ.12:427424-427473	70	62	C(18) > G(17) > T(13) > A(2)	-	-	1134	1134
LINF_120014300	106	446943	446919	22.6415	+	445092	1851	1834	24	LinJ.12:446944-446993	76	64	C(23) > G(15) > T(9) > A(3)	374	374	374	374
LINF_120014400	1634	450044	450063	27.8458	+	448734	1310	1370	19	LinJ.12:450045-450094	72	54	C(22) > G(14) > A(9) > T(5)	251	251	19	19
LINF_120014500	2708	451710	451686	22.2304	+	451012	698	ND	24	LinJ.12:451711-451760	76	64	C(23) > G(15) > T(9) > A(3)	361	361	361	361
LINF_120014700	1157	455003	453868	23.5955	+	453693	1310	1370	1135	LinJ.12:455004-455053	72	54	C(22) > G(14) > A(9) > T(5)	-	-	-	-
LINF_120015000	117	466196	466208	22.2222	+	463756	2440	5883	12	LinJ.12:466197-466246	72	54	C(22) > G(14) > A(9) > T(5)	-	-	-	-
LINF_120015100	904	475270	475292	12.7212	+	475002	268	43	22	LinJ.12:475271-475320	60	56	C(18) > G(12) > A(10) > T(10)	-	-	230	230
LINF_120015200	557	478491	478488	10.772	+	477486	1005	1392	3	LinJ.12:478492-478541	54	38	A(16) > G(15) > C(12) > T(7)	303	303	303	303
LINF_120015700	231	508839	508837	25.5411	+	508151	688	976	2	LinJ.12:508840-508889	54	44	A(17) > C(16) > G(11) > T(6)	-	-	-	-
LINF_120015900	518	517573	517575	12.9344	+	517036	537	587	2	LinJ.12:517574-517623	66	40	G(21) > C(12) > A(9) > T(8)	-	-	-	-
LINF_120016000	506	520878	520914	15.415	+	520664	214	690	36	LinJ.12:520879-520928	56	52	C(16) > A(12) > G(12) > T(10)	-	-	-	-
LINF_120016300	188	539524	539520	28.1915	+	539051	473	1226	4	LinJ.12:539525-539574	54	46	G(17) > T(13) > A(10) > C(10)	-	-	-	-
LINF_120016500	439	549205	549213	16.4009	+	549102	103	161	8	LinJ.12:549206-549255	54	46	A(17) > C(17) > G(10) > T(6)	-	-	-	-
LINF_120016700	299	558677	558698	12.0401	+	558357	320	630	21	LinJ.12:558678-558727	54	40	A(19) > C(16) > G(11) > T(4)	-	-	630	-
LINF_120016900	895	565925	565929	13.0726	+	564889	1036	1088	4	LinJ.12:565926-565975	48	48	A(16) > C(14) > T(10) > G(10)	-	-	-	-
LINF_120017000	292	568591	568577	15.411	+	568298	293	376	14	LinJ.12:568592-568641	50	46	A(15) > C(13) > G(12) > T(10)	-	-	342	342
LINF_120017100	769	570122	570110	23.6671	+	569971	151	ND	12	LinJ.12:570123-570172	60	42	G(17) > C(13) > A(12) > T(8)	252	252	252	252
LINF_120017200	844	572606	572616	19.3128	+	572298	308	549	10	LinJ.12:572607-572656	56	60	T(17) > G(15) > C(13) > A(5)	437	437	437	437
LINF_120017300	2163	573797	573796	31.068	+	573671	126	171	1	LinJ.12:573798-573847	56	44	A(14) > G(14) > C(14) > T(8)	-	-	-	-
LINF_120017500	338	581354	581356	24.8521	+	580702	652	367	2	LinJ.12:581355-581404	62	66	C(21) > T(12) > G(10) > A(7)	-	-	-	-
LINF_120017700	402	589979	589982	24.1294	+	589725	254	ND	3	LinJ.12:589980-590029	52	46	A(16) > C(15) > G(11) > T(8)	280	314	252	280
LINF_130005100	668	5189	4436	22.006	-	5485	296	1062	753	LinJ.13:5140-5189	52	40	A(19) > C(15) > G(11) > T(5)	249	249	249	249
LINF_130005200	2672	7096	7089	26.3847	-	7278	182	242	7	LinJ.13:7047-7096	52	62	C(19) > A(12) > T(12) > G(7)	-	-	343	343
LINF_130005300	2416	8416	8322	18.3361	-	8702	286	46	94	LinJ.13:8367-8416	56	76	T(19) > C(19) > G(9) > A(3)	383	383	383	383
LINF_130006000	1004	30847	30848	17.4303	-	31250	403	493	1	LinJ.13:30798-30847	54	60	C(20) > A(13) > T(10) > G(7)	-	-	288	-
LINF_130006200	189	36547	37794	12.6984	-	37874	1327	3103	1247	LinJ.13:36498-36547	50	54	C(15) > A(13) > T(12) > G(10)	-	-	334	343
LINF_130006300	2580	40696	40716	21.0853	-	41185	489	493	20	LinJ.13:40647-40696	62	46	G(17) > C(14) > A(10) > T(9)	-	-	-	-
LINF_130006700	287	50955	50925	18.8153	-	51137	182	252	30	LinJ.13:50906-50955	50	46	A(15) > C(13) > G(12) > T(10)	402	402	402	402
LINF_130006800	33	56958	56960	18.1818	-	57378	420	3989	2	LinJ.13:56909-56958	62	64	T(17) > G(16) > C(15) > A(2)	-	-	-	-
LINF_130007100	952	69617	69623	26.1555	-	69957	340	757	6	LinJ.13:69568-69617	54	58	T(16) > G(14) > C(13) > A(7)	-	-	-	-
LINF_130007300	1785	74486	74490	19.1597	-	75222	736	782	4	LinJ.13:74437-74486	58	48	C(17) > A(14) > G(12) > T(7)	-	-	705	705
LINF_130007400	1049	78427	78428	15.9199	-	78651	224	1977	1	LinJ.13:78378-78427	54	38	A(16) > G(15) > C(12) > T(7)	388	392	388	388
LINF_130007500	805	80492	80500	15.2795	-	80759	267	212	8	LinJ.13:80443-80492	50	62	T(18) > C(13) > G(12) > A(7)	212	212	212	212
LINF_130008900	352	118265	118434	21.3068	-	118467	202	381	169	LinJ.13:118216-118265	74	66	C(27) > G(10) > A(7) > T(6)	-	430	430	430
LINF_130009100	1770	129470	129462	13.9548	-	129506	36	70	8	LinJ.13:129421-129470	62	54	C(21) > A(13) > G(10) > T(6)	-	-	401	401
LINF_130009200	761	132299	132301	20.7622	-	132539	240	290	2	LinJ.13:132250-132299	58	50	C(17) > A(13) > G(12) > T(8)	475	475	475	475
LINF_130009500	1717	150053	150061	19.3943	+	149217	836	1757	8	LinJ.13:150054-150103	42	42	A(19) > C(11) > T(10) > G(10)	265	265	265	265
LINF_130010100	676	170549	170543	19.0828	+	169874	675	2572	6	LinJ.13:170550-170599	68	62	C(20) > G(14) > T(11) > A(5)	19	385	19	520
LINF_130010400	259	181285	181283	23.166	+	180517	768	830	2	LinJ.13:181286-181335	48	46	A(18) > C(15) > G(9) > T(8)	378	378	378	378
LINF_130010700	328	192632	192662	22.2561	+	192106	526	606	30	LinJ.13:192633-192682	58	36	A(18) > C(15) > G(14) > T(3)	407	407	407	407
LINF_130010800	1668	194520	194519	21.7626	+	194126	394	238	1	LinJ.13:194521-194570	62	36	G(19) > A(13) > C(12) > T(6)	505	505	-	-
LINF_130010900	751	196396	196395	15.1798	+	195821	575	413	1	LinJ.13:196397-196446	54	50	C(15) > A(13) > G(12) > T(10)	-	-	342	342
LINF_130011000	150	197687	197726	26	+	197671	16	1966	39	LinJ.13:197688-197737	62	44	C(16) > G(15) > A(13) > T(6)	-	851	851	851
LINF_130011100	317	202383	202382	9.77918	+	201381	1002	1012	1	LinJ.13:202384-202433	50	42	G(19) > T(15) > A(10) > C(6)	283	283	283	283
LINF_130011200	1103	203927	203915	43.7897	+	203774	153	73	12	LinJ.13:203928-203977	64	50	G(17) > C(15) > T(10) > A(8)	-	-	-	-
LINF_130011300	274	208966	208963	24.4526	+	208302	664	634	3	LinJ.13:208967-209016	60	46	G(16) > C(14) > A(11) > T(9)	-	-	-	-
LINF_130011900	207	233876	233878	14.9758	+	233821	55	1334	2	LinJ.13:233877-233926	66	38	C(17) > G(16) > A(15) > T(2)	-	-	-	-
LINF_130012000	267	234328	234382	27.7154	-	235203	875	ND	54	LinJ.13:234279-234328	52	36	A(18) > G(14) > C(12) > T(6)	-	-	-	-
LINF_130012200	674	239031	239036	24.6291	-	239414	383	124	5	LinJ.13:238982-239031	60	62	C(17) > T(14) > G(13) > A(6)	505	505	505	505
LINF_130012300	496	242775	242774	20.7661	-	243050	275	636	1	LinJ.13:242726-242775	64	64	C(19) > T(13) > G(13) > A(5)	-	-	364	364
LINF_130012400	887	247100	247101	41.1499	-	247680	580	812	1	LinJ.13:247051-247100	74	74	C(30) > T(7) > G(7) > A(6)	-	-	-	-
LINF_130012500	453	248836	248839	31.7881	-	249260	424	474	3	LinJ.13:248787-248836	62	40	G(16) > C(15) > A(14) > T(5)	245	245	245	245
LINF_130012600	1112	256042	256039	31.8345	-	256326	284	337	3	LinJ.13:255993-256042	58	44	G(15) > C(14) > A(13) > T(8)	-	-	-	-
LINF_130012700	490	259322	259323	17.7551	-	259811	489	663	1	LinJ.13:259273-259322	48	62	T(24) > G(17) > C(7) > A(2)	1174	1174	670	1174
LINF_130012800	625	262269	262255	18.24	-	262401	132	198	14	LinJ.13:262220-262269	54	30	A(19) > G(16) > C(11) > T(4)	520	-	520	520
LINF_130012900	456	264882	264884	25.8772	-	265234	352	129	2	LinJ.13:264833-264882	56	58	C(16) > T(13) > G(12) > A(9)	-	335	335	335
LINF_130013100	3025	278939	278940	37.2231	-	279030	91	1566	1	LinJ.13:278890-278939	56	46	G(16) > C(12) > A(11) > T(11)	-	-	-	-
LINF_130013300	1085	285085	285088	17.3272	-	285174	89	190	3	LinJ.13:285036-285085	52	46	G(21) > T(18) > A(6) > C(5)	-	-	-	-
LINF_130013600	719	297082	297073	13.9082	-	297855	773	777	9	LinJ.13:297033-297082	48	38	A(19) > G(12) > C(12) > T(7)	453	453	453	453
LINF_130014100	293	314863	314865	19.4539	-	315671	808	868	2	LinJ.13:314814-314863	60	50	C(17) > G(13) > A(12) > T(8)	-	-	-	-
LINF_130014200	2225	320746	320751	15.6404	-	320971	225	275	5	LinJ.13:320697-320746	58	24	G(21) > A(17) > C(8) > T(4)	-	-	-	-
LINF_130014300	674	322250	322252	19.7329	-	322567	317	400	2	LinJ.13:322201-322250	46	40	A(18) > G(12) > C(11) > T(9)	319	319	319	319
LINF_130014400	706	325186	325177	25.4958	-	325567	381	165	9	LinJ.13:325137-325186	48	72	T(21) > C(15) > G(9) > A(5)	295	292	292	-
LINF_130014600	419	330162	330177	25.537	-	330881	719	739	15	LinJ.13:330113-330162	50	48	A(17) > C(16) > G(9) > T(8)	456	456	456	456
LINF_130014700	676	333523	333513	37.1302	-	333734	211	253	10	LinJ.13:333474-333523	64	48	G(19) > C(13) > T(11) > A(7)	-	-	329	329
LINF_130014800	798	339373	339374	17.9198	-	339606	233	426	1	LinJ.13:339324-339373	58	64	C(19) > T(13) > G(10) > A(8)	-	-	-	-
LINF_130014900	1160	341557	341562	20.6897	-	341901	344	389	5	LinJ.13:341508-341557	42	38	A(22) > C(12) > G(9) > T(7)	-	-	-	-
LINF_130015000	555	343616	343665	14.955	-	344151	535	98	49	LinJ.13:343567-343616	70	70	C(27) > T(8) > G(8) > A(7)	200	200	200	200
LINF_130015400	325	358835	358846	15.3846	-	359622	787	595	11	LinJ.13:358786-358835	58	78	C(20) > T(19) > G(9) > A(2)	-	-	-	-
LINF_130015600	350	362148	362136	38.5714	-	363577	1429	1479	12	LinJ.13:362099-362148	50	38	A(20) > C(14) > G(11) > T(5)	374	374	374	374
LINF_130015800	411	374904	374894	33.5766	-	375065	161	115	10	LinJ.13:374855-374904	64	48	G(19) > C(13) > T(11) > A(7)	-	-	-	-
LINF_130015900	1011	383007	383012	16.1227	-	383728	721	3390	5	LinJ.13:382958-383007	58	36	G(17) > A(15) > C(12) > T(6)	445	445	445	445
LINF_130016000	137	385831	385836	16.0584	-	387217	1386	1578	5	LinJ.13:385782-385831	58	36	G(19) > A(13) > C(10) > T(8)	636	636	636	636
LINF_130016200	1521	394549	394417	8.02104	-	394795	246	470	132	LinJ.13:394500-394549	62	28	G(23) > A(13) > C(8) > T(6)	-	-	-	-
LINF_130016300	924	395567	395562	35.1732	-	396221	654	712	5	LinJ.13:395518-395567	46	32	A(21) > G(13) > C(10) > T(6)	489	489	489	489
LINF_130016700	931	404515	404465	9.55961	-	404644	129	214	50	LinJ.13:404466-404515	46	34	A(25) > C(15) > G(8) > T(2)	600	488	600	429
LINF_130016800	905	406963	406964	13.9227	-	407727	764	722	1	LinJ.13:406914-406963	60	72	C(24) > T(12) > A(8) > G(6)	-	-	46	341
LINF_130017200	38568	423505	423499	29.203	-	423862	357	576	6	LinJ.13:423456-423505	58	48	C(19) > A(16) > G(10) > T(5)	-	-	-	-
LINF_130017400	182	427844	427836	18.1319	-	428934	1090	737	8	LinJ.13:427795-427844	62	50	C(20) > A(14) > G(11) > T(5)	432	432	432	432
LINF_130017600	1220	431110	431122	19.5902	-	431665	555	277	12	LinJ.13:431061-431110	34	84	T(29) > C(13) > A(4) > G(4)	-	-	-	451
LINF_130017700	349	434084	434086	25.2149	-	434439	355	1813	2	LinJ.13:434035-434084	56	58	C(19) > A(12) > T(10) > G(9)	1086	221	221	221
LINF_130018200	388	451534	451533	46.6495	-	452074	540	948	1	LinJ.13:451485-451534	56	42	G(17) > A(12) > C(11) > T(10)	-	-	-	-
LINF_130018500	853	466186	466187	33.0598	-	467147	961	1020	1	LinJ.13:466137-466186	56	34	G(20) > A(13) > T(9) > C(8)	-	-	-	-
LINF_130018600	710	469529	469528	25.2113	-	469761	232	280	1	LinJ.13:469480-469529	58	40	G(16) > A(14) > C(13) > T(7)	-	364	364	364
LINF_130019000	618	489334	489337	27.1845	-	489930	596	646	3	LinJ.13:489285-489334	42	34	A(20) > G(13) > T(9) > C(8)	-	-	296	296
LINF_130019500	1765	509573	509565	12.7479	-	509967	394	4130	8	LinJ.13:509524-509573	48	30	A(22) > G(13) > C(11) > T(4)	271	544	271	271
LINF_130019700	844	513182	513298	20.1422	-	513685	503	203	116	LinJ.13:513133-513182	72	52	C(21) > G(15) > A(9) > T(5)	227	227	227	227
LINF_130019800	1016	515989	516005	16.3386	-	516168	179	213	16	LinJ.13:515940-515989	68	34	G(23) > C(11) > A(10) > T(6)	422	422	422	422
LINF_130020000	712	523109	523110	17.5562	-	523827	718	768	1	LinJ.13:523060-523109	50	42	A(20) > C(16) > G(9) > T(5)	501	501	501	501
LINF_130020200	2682	545227	545226	27.6659	-	545931	704	2706	1	LinJ.13:545178-545227	52	24	G(20) > A(18) > T(6) > C(6)	420	420	420	420
LINF_130020300	576	547038	547021	19.6181	-	547265	227	200	17	LinJ.13:546989-547038	48	50	A(16) > C(15) > T(10) > G(9)	421	289	289	289
LINF_130020600	2877	563112	563115	15.3632	-	563604	492	1334	3	LinJ.13:563063-563112	62	28	G(19) > A(17) > C(12) > T(2)	-	-	333	333
LINF_130020800	123	570592	570593	43.0894	-	570913	321	2236	1	LinJ.13:570543-570592	42	66	T(23) > G(11) > C(10) > A(6)	245	245	239	240
LINF_130020900	1882	575834	575829	35.7598	-	576109	275	905	5	LinJ.13:575785-575834	50	30	A(22) > G(13) > C(12) > T(3)	-	-	371	-
LINF_130021100	4195	583700	583698	15.7569	-	584245	545	607	2	LinJ.13:583651-583700	50	24	A(22) > G(16) > C(9) > T(3)	-	-	-	-
LINF_130021200	191	588219	588220	24.0838	-	588388	169	2350	1	LinJ.13:588170-588219	54	46	G(15) > A(12) > C(12) > T(11)	348	348	348	348
LINF_130021700	186	615367	615385	12.3656	-	616442	1075	1054	18	LinJ.13:615318-615367	60	60	C(18) > T(12) > G(12) > A(8)	-	-	-	-
LINF_130021900	624	626189	626195	10.2564	-	626472	283	337	6	LinJ.13:626140-626189	46	40	A(21) > C(14) > G(9) > T(6)	-	-	-	-
LINF_130022000	249	629475	629479	16.0643	-	629892	417	1688	4	LinJ.13:629426-629475	56	48	C(17) > A(15) > G(11) > T(7)	366	366	366	366
LINF_130022100	1125	644594	644581	16.2667	-	644990	396	450	13	LinJ.13:644545-644594	44	38	A(20) > G(11) > C(11) > T(8)	-	-	-	-
LINF_130022200	87464	647026	647024	25.4036	-	647101	75	17	2	LinJ.13:646977-647026	36	46	T(17) > A(15) > G(12) > C(6)	249	249	249	249
LINF_130022500	387	656393	656275	15.2455	+	655696	697	ND	118	LinJ.13:656394-656443	62	50	G(17) > C(14) > T(11) > A(8)	-	-	-	-
LINF_140005000	1795	3915	3901	27.9109	+	3754	161	181	14	LinJ.14:3916-3965	44	52	A(14) > T(14) > C(12) > G(10)	-	-	243	243
LINF_140005100	592	7465	7470	19.5946	+	7358	107	164	5	LinJ.14:7466-7515	44	34	A(22) > G(11) > C(11) > T(6)	316	316	330	330
LINF_140005200	1433	8870	8872	14.7941	+	8675	195	237	2	LinJ.14:8871-8920	48	54	T(15) > G(12) > C(12) > A(11)	-	-	-	-
LINF_140005300	157	13543	13547	33.121	+	12619	924	312	4	LinJ.14:13544-13593	44	32	A(24) > C(12) > G(10) > T(4)	335	335	335	335
LINF_140005400	502	16348	16341	17.3307	+	16160	188	10	7	LinJ.14:16349-16398	52	70	C(18) > T(17) > G(8) > A(7)	151	151	151	151
LINF_140005500	2096	17447	17440	34.9714	+	17280	167	222	7	LinJ.14:17448-17497	52	48	A(16) > C(16) > G(10) > T(8)	264	264	264	264
LINF_140005600	434	19451	19447	14.2857	+	18788	663	716	4	LinJ.14:19452-19501	54	52	C(16) > A(13) > G(11) > T(10)	247	247	247	247
LINF_140005700	2629	20878	20876	36.744	+	20655	223	279	2	LinJ.14:20879-20928	46	32	A(18) > G(16) > T(9) > C(7)	226	226	226	226
LINF_140006000	1037	29452	29470	18.5149	+	29235	217	577	18	LinJ.14:29453-29502	44	56	T(19) > G(13) > A(9) > C(9)	-	-	501	-
LINF_140006300	1065	37159	37161	31.6432	+	36720	439	491	2	LinJ.14:37160-37209	48	34	A(19) > G(14) > C(10) > T(7)	356	356	356	356
LINF_140006400	1348	38635	38631	20.2522	+	38268	367	162	4	LinJ.14:38636-38685	64	70	C(22) > T(13) > G(10) > A(5)	-	-	-	290
LINF_140006600	161	46024	46026	26.7081	+	45527	497	32	2	LinJ.14:46025-46074	58	66	T(18) > C(15) > G(14) > A(3)	489	489	489	489
LINF_140006700	899	48634	48636	23.1368	+	48121	513	570	2	LinJ.14:48635-48684	52	40	A(17) > G(13) > C(13) > T(7)	487	487	487	487
LINF_140006800	2852	50701	50703	16.5147	+	49818	883	948	2	LinJ.14:50702-50751	48	40	A(16) > G(14) > T(10) > C(10)	467	467	467	467
LINF_140006900	854	52054	52058	12.5293	+	51935	119	687	4	LinJ.14:52055-52104	42	50	A(18) > C(14) > T(11) > G(7)	268	268	268	268
LINF_140007000	2079	55462	55461	30.8321	+	55100	362	1016	1	LinJ.14:55463-55512	72	34	G(24) > C(12) > A(9) > T(5)	-	-	-	-
LINF_140007100	109	59506	59505	20.1835	+	58312	1194	1654	1	LinJ.14:59507-59556	56	38	G(16) > A(15) > C(12) > T(7)	430	-	430	430
LINF_140007200	272	62243	62241	26.8382	+	60954	1289	1331	2	LinJ.14:62244-62293	42	58	T(15) > A(14) > C(14) > G(7)	-	-	-	-
LINF_140007300	312	68682	68680	20.5128	+	68230	452	565	2	LinJ.14:68683-68732	56	60	C(19) > A(11) > T(11) > G(9)	437	437	437	437
LINF_140007400	1091	69886	69884	24.198	+	69632	254	68	2	LinJ.14:69887-69936	64	64	C(19) > T(13) > G(13) > A(5)	225	225	225	225
LINF_140007600	535	75941	75950	16.2617	+	75240	701	766	9	LinJ.14:75942-75991	50	36	A(18) > G(14) > C(11) > T(7)	-	327	327	327
LINF_140007700	606	78078	78070	9.90099	+	77864	214	266	8	LinJ.14:78079-78128	64	36	G(18) > A(14) > C(14) > T(4)	-	-	-	-
LINF_140008000	1286	85692	85700	17.1851	+	85500	192	281	8	LinJ.14:85693-85742	60	52	C(18) > A(12) > G(12) > T(8)	391	391	391	391
LINF_140008300	134	97129	97128	17.9104	+	96338	791	3726	1	LinJ.14:97130-97179	66	60	C(22) > G(11) > A(9) > T(8)	209	209	209	209
LINF_140008400	70	105888	105055	21.4286	+	104097	1791	1730	833	LinJ.14:105889-105938	60	52	G(15) > C(15) > T(11) > A(9)	-	-	-	-
LINF_140008500	187	109800	109803	15.508	+	108519	1281	1344	3	LinJ.14:109801-109850	50	30	A(19) > G(16) > C(9) > T(6)	-	-	-	-
LINF_140008600	706	113925	113773	8.49858	+	113617	308	358	152	LinJ.14:113926-113975	56	38	G(16) > A(15) > C(12) > T(7)	-	-	-	-
LINF_140008700	378	123874	123870	25.9259	+	123698	176	709	4	LinJ.14:123875-123924	64	54	C(18) > G(14) > A(9) > T(9)	-	-	-	-
LINF_140009000	81	137902	137905	49.3827	+	135851	2051	2104	3	LinJ.14:137903-137952	50	42	A(17) > C(13) > G(12) > T(8)	-	-	-	-
LINF_140009300	1638	146420	146422	22.4664	+	146091	329	217	2	LinJ.14:146421-146470	48	60	C(20) > A(16) > T(10) > G(4)	-	-	-	-
LINF_140009400	558	150238	150236	18.8172	+	149928	310	354	2	LinJ.14:150239-150288	52	54	C(17) > A(14) > T(10) > G(9)	-	-	-	-
LINF_140009700	587	158570	158568	60.9881	+	158293	277	85	2	LinJ.14:158571-158620	58	72	C(21) > T(15) > G(8) > A(6)	328	328	328	328
LINF_140009800	567	160391	160424	19.9295	+	159692	699	766	33	LinJ.14:160392-160441	52	56	C(18) > A(14) > T(10) > G(8)	318	318	318	318
LINF_140009900	1741	162300	162290	17.0592	+	161936	364	115	10	LinJ.14:162301-162350	50	36	G(18) > A(14) > T(11) > C(7)	-	-	278	278
LINF_140010400	1893	187894	187886	22.2927	-	188295	401	3865	8	LinJ.14:187845-187894	54	50	G(15) > T(13) > C(12) > A(10)	-	-	-	-
LINF_140010600	2858	196875	196890	14.9755	-	197034	159	813	15	LinJ.14:196826-196875	54	28	A(19) > G(17) > C(10) > T(4)	-	-	-	-
LINF_140010700	1132	197770	197777	26.4134	-	198114	344	394	7	LinJ.14:197721-197770	48	44	A(15) > G(13) > T(11) > C(11)	345	345	345	345
LINF_140010900	95	204507	204523	21.0526	-	205906	1399	2702	16	LinJ.14:204458-204507	48	56	T(21) > G(17) > C(7) > A(5)	353	353	353	353
LINF_140011100	1501	213593	213823	12.3917	-	213897	304	358	230	LinJ.14:213544-213593	52	44	G(15) > A(13) > T(11) > C(11)	-	-	-	-
LINF_140011200	730	215531	215532	11.7808	-	215874	343	408	1	LinJ.14:215482-215531	60	48	C(18) > A(14) > G(12) > T(6)	552	552	552	552
LINF_140011600	492	229189	229205	21.1382	-	229459	270	320	16	LinJ.14:229140-229189	60	42	G(16) > C(14) > A(13) > T(7)	274	274	274	274
LINF_140011700	1538	231290	231291	21.7815	-	231587	297	347	1	LinJ.14:231241-231290	58	58	C(22) > A(14) > T(7) > G(7)	343	-	343	343
LINF_140011800	1978	233936	233872	10.7179	-	234225	289	650	64	LinJ.14:233887-233936	58	58	T(17) > G(17) > C(12) > A(4)	609	915	609	915
LINF_140012000	175	239888	239884	10.2857	-	241380	1492	1512	4	LinJ.14:239839-239888	36	60	T(20) > A(12) > C(10) > G(8)	-	-	-	-
LINF_140012200	1123	247155	246867	11.398	-	247902	747	812	288	LinJ.14:247106-247155	50	34	A(18) > G(15) > C(10) > T(7)	-	-	626	-
LINF_140012500	211	267465	267468	19.9052	-	269186	1721	1760	3	LinJ.14:267416-267465	64	22	G(25) > A(14) > C(7) > T(4)	-	-	-	-
LINF_140012600	111	270580	270581	25.2252	-	271711	1131	1170	1	LinJ.14:270531-270580	64	22	G(25) > A(14) > C(7) > T(4)	325	325	325	325
LINF_140013400	1059	312936	312938	46.7422	-	313348	412	462	2	LinJ.14:312887-312936	74	42	G(19) > C(18) > A(10) > T(3)	-	-	-	-
LINF_140013500	230	315645	315653	7.3913	-	317172	1527	1687	8	LinJ.14:315596-315645	62	56	C(19) > G(12) > A(10) > T(9)	298	298	298	298
LINF_140013600	1504	318952	318951	13.6968	-	319345	393	436	1	LinJ.14:318903-318952	62	28	G(21) > A(15) > C(10) > T(4)	-	-	325	373
LINF_140014000	854	344607	344379	20.726	-	345057	450	398	228	LinJ.14:344558-344607	58	50	C(16) > G(13) > A(12) > T(9)	-	-	-	-
LINF_140014100	137	347310	347314	8.75912	-	348111	801	843	4	LinJ.14:347261-347310	56	50	C(17) > A(14) > G(11) > T(8)	476	-	476	476
LINF_140014300	676	352490	352492	23.3728	-	353088	598	1019	2	LinJ.14:352441-352490	52	36	A(18) > G(14) > C(12) > T(6)	-	-	-	-
LINF_140014500	511	360923	360926	19.3738	-	362664	1741	1791	3	LinJ.14:360874-360923	54	32	A(21) > C(14) > G(13) > T(2)	473	473	473	473
LINF_140014600	537	364504	364505	20.4842	-	364879	375	1333	1	LinJ.14:364455-364504	56	48	G(16) > T(12) > C(12) > A(10)	318	318	318	318
LINF_140014700	266	364504	364505	21.0526	-	365612	1108	ND	1	LinJ.14:364455-364504	56	48	G(16) > T(12) > C(12) > A(10)	318	318	318	318
LINF_140014800	781	368143	368069	12.9321	-	368498	355	406	74	LinJ.14:368094-368143	46	30	G(18) > A(17) > T(10) > C(5)	-	-	301	301
LINF_140014900	375	372298	372299	13.8667	-	372806	508	581	1	LinJ.14:372249-372298	62	30	G(20) > A(15) > C(11) > T(4)	-	-	-	427
LINF_140015300	178	390578	390595	11.236	-	391159	581	385	17	LinJ.14:390529-390578	56	38	A(17) > G(14) > C(14) > T(5)	302	302	302	302
LINF_140015600	770	408590	408592	24.2857	-	409184	594	993	2	LinJ.14:408541-408590	56	40	A(18) > C(16) > G(12) > T(4)	377	377	377	377
LINF_140015700	585	410475	410474	15.8974	-	410957	482	522	1	LinJ.14:410426-410475	54	32	A(22) > C(15) > G(12) > T(1)	691	-	691	691
LINF_140015800	373	415163	415165	23.3244	-	416475	1312	1638	2	LinJ.14:415114-415163	58	46	G(19) > T(13) > C(10) > A(8)	300	300	300	-
LINF_140016200	851	432521	432524	16.9213	-	432552	31	81	3	LinJ.14:432472-432521	52	20	A(21) > G(19) > C(7) > T(3)	332	332	332	332
LINF_140016400	1882	438474	438470	26.0361	-	438697	223	270	4	LinJ.14:438425-438474	52	34	G(17) > A(16) > C(9) > T(8)	-	234	234	238
LINF_140016600	1140	444011	444012	18.4211	-	444240	229	279	1	LinJ.14:443962-444011	56	34	A(17) > G(16) > C(12) > T(5)	252	-	252	252
LINF_140016700	2477	446956	446958	9.48728	-	447022	66	1793	2	LinJ.14:446907-446956	30	48	A(18) > T(17) > G(8) > C(7)	338	338	260	338
LINF_140017000	1618	472639	472641	29.0482	+	472317	322	387	2	LinJ.14:472640-472689	50	30	A(22) > G(13) > C(12) > T(3)	432	432	432	432
LINF_140017400	133	505008	505006	17.2932	+	504251	757	2216	2	LinJ.14:505009-505058	56	28	A(19) > G(17) > C(11) > T(3)	433	433	433	433
LINF_140017600	546	525992	525965	18.315	+	525805	187	1423	27	LinJ.14:525993-526042	60	50	C(16) > G(14) > A(11) > T(9)	297	297	297	297
LINF_140017900	1991	536504	536515	23.7569	+	535985	519	270	11	LinJ.14:536505-536554	52	54	C(16) > A(13) > T(11) > G(10)	268	268	268	268
LINF_140018100	431	543629	543694	27.1462	+	543102	527	577	65	LinJ.14:543630-543679	64	52	C(19) > G(13) > A(11) > T(7)	-	-	354	354
LINF_140018200	610	546682	546683	19.1803	+	546530	152	99	1	LinJ.14:546683-546732	54	40	G(16) > A(14) > C(11) > T(9)	521	521	521	521
LINF_140018300	1733	549459	549454	16.4455	+	549104	355	722	5	LinJ.14:549460-549509	48	48	T(15) > G(15) > A(11) > C(9)	345	345	345	345
LINF_140018400	547	552151	552143	23.0347	+	551422	729	784	8	LinJ.14:552152-552201	48	48	T(14) > G(14) > A(12) > C(10)	373	373	373	373
LINF_140018600	181	557616	557633	11.6022	+	557332	284	1424	17	LinJ.14:557617-557666	56	64	C(18) > T(14) > G(10) > A(8)	-	239	-	239
LINF_140018700	526	561928	561936	43.5361	+	561185	743	1118	8	LinJ.14:561929-561978	64	70	C(19) > T(16) > G(13) > A(2)	268	268	268	268
LINF_140018800	941	563703	563701	23.0606	+	563425	278	328	2	LinJ.14:563704-563753	50	54	C(16) > A(14) > T(11) > G(9)	356	356	356	356
LINF_140019100	25941	569439	569440	17.2815	+	569176	263	313	1	LinJ.14:569440-569489	58	50	C(16) > G(13) > A(12) > T(9)	-	-	-	-
LINF_140019300	253	575388	575384	22.1344	+	575002	386	937	4	LinJ.14:575389-575438	54	72	T(18) > C(18) > G(9) > A(5)	-	-	-	-
LINF_140019400	153	580772	582282	34.6405	+	579892	880	2428	1510	LinJ.14:580773-580822	64	70	C(19) > T(16) > G(13) > A(2)	309	309	309	309
LINF_140019700	639	592067	592066	17.6839	+	591267	800	1343	1	LinJ.14:592068-592117	56	42	G(16) > A(13) > C(12) > T(9)	-	467	467	467
LINF_140019900	1109	598101	598105	52.6601	+	597849	252	2152	4	LinJ.14:598102-598151	58	54	C(18) > A(12) > G(11) > T(9)	313	313	313	313
LINF_140020000	1926	602811	602809	37.3832	+	602150	661	2269	2	LinJ.14:602812-602861	62	52	G(18) > T(13) > C(13) > A(6)	311	311	311	311
LINF_140020100	865	607456	607453	22.0809	+	607167	289	339	3	LinJ.14:607457-607506	56	40	A(16) > G(14) > C(14) > T(6)	392	392	392	392
LINF_140020200	1390	609733	609737	17.9856	+	609232	501	549	4	LinJ.14:609734-609783	48	22	A(24) > G(15) > C(9) > T(2)	12	248	248	248
LINF_140020300	5805	611035	611024	17.5711	+	610721	314	364	11	LinJ.14:611036-611085	62	46	C(18) > A(14) > G(13) > T(5)	404	404	337	337
LINF_140020400	358	613545	613544	11.1732	+	611981	1564	4699	1	LinJ.14:613546-613595	60	50	C(16) > G(14) > A(11) > T(9)	328	328	328	328
LINF_140020500	657	620581	620460	16.2861	+	620230	351	2631	121	LinJ.14:620582-620631	64	62	C(20) > G(12) > T(11) > A(7)	346	346	346	346
LINF_140020700	703	628900	628839	17.2119	+	628823	77	67	61	LinJ.14:628901-628950	62	60	C(18) > G(13) > T(12) > A(7)	-	-	-	-
LINF_140021000	2056	644463	644496	13.7646	+	644234	229	318	33	LinJ.14:644464-644513	52	34	A(19) > G(14) > C(12) > T(5)	350	350	350	350
LINF_140021100	696	646437	646443	29.1667	+	645380	1057	960	6	LinJ.14:646438-646487	60	52	G(15) > C(15) > T(11) > A(9)	291	291	291	291
LINF_140021300	733	650525	650537	24.1473	+	649918	607	540	12	LinJ.14:650526-650575	54	44	A(16) > C(15) > G(12) > T(7)	-	-	641	-
LINF_150005000	47086	1106	1110	23.4082	-	1308	202	ND	4	LinJ.15:1057-1106	46	34	A(19) > G(14) > C(9) > T(8)	-	-	-	-
LINF_150005100	870	1914	1915	17.0115	-	2079	165	200	1	LinJ.15:1865-1914	50	34	A(17) > G(16) > C(9) > T(8)	226	226	226	226
LINF_150005300	980	6532	6528	15.102	-	6910	378	426	4	LinJ.15:6483-6532	44	46	A(18) > C(13) > T(10) > G(9)	386	-	359	359
LINF_150005600	666	21447	21448	18.1682	-	22216	769	829	1	LinJ.15:21398-21447	52	44	G(15) > A(13) > T(11) > C(11)	-	-	-	-
LINF_150005900	708	30101	30010	19.0678	-	30543	442	920	91	LinJ.15:30052-30101	50	50	A(16) > C(16) > T(9) > G(9)	439	-	439	439
LINF_150006000	503	32772	32774	22.2664	-	33362	590	625	2	LinJ.15:32723-32772	58	40	G(19) > A(11) > T(10) > C(10)	-	372	370	372
LINF_150006100	549	36104	36105	11.6576	-	36837	733	510	1	LinJ.15:36055-36104	70	48	G(18) > C(17) > A(8) > T(7)	-	291	-	-
LINF_150006600	1027	64681	64625	28.5297	-	65047	366	1990	56	LinJ.15:64632-64681	48	66	T(22) > G(13) > C(11) > A(4)	320	320	320	336
LINF_150006700	242	66798	66800	15.7025	-	67660	862	285	2	LinJ.15:66749-66798	68	64	C(23) > G(11) > T(9) > A(7)	416	416	416	416
LINF_150006900	1375	75878	75875	12.8727	-	76427	549	602	3	LinJ.15:75829-75878	50	38	A(18) > G(13) > C(12) > T(7)	-	-	553	553
LINF_150007100	22174	80143	80135	21.2952	-	80352	209	298	8	LinJ.15:80094-80143	44	44	A(21) > C(15) > T(7) > G(7)	508	508	503	503
LINF_150007300	543	85757	85749	41.2523	-	85904	147	197	8	LinJ.15:85708-85757	38	46	A(17) > T(14) > G(10) > C(9)	-	276	276	276
LINF_150007500	270	90812	90827	14.8148	+	90630	182	4	15	LinJ.15:90813-90862	46	32	A(17) > G(17) > T(10) > C(6)	343	343	343	343
LINF_150007600	824	93546	93549	10.9223	+	92972	574	396	3	LinJ.15:93547-93596	42	50	A(15) > T(14) > C(11) > G(10)	241	241	241	241
LINF_150007700	773	95693	95691	23.8034	+	95254	439	27	2	LinJ.15:95694-95743	64	68	C(21) > T(13) > G(11) > A(5)	-	-	-	-
LINF_150007900	811	105758	105748	12.5771	+	105183	575	638	10	LinJ.15:105759-105808	52	50	C(21) > A(20) > G(5) > T(4)	372	367	367	367
LINF_150008100	822	110896	110900	35.2798	+	110034	862	1125	4	LinJ.15:110897-110946	62	42	G(16) > C(15) > A(13) > T(6)	525	525	525	-
LINF_150008300	877	116524	116494	12.7708	+	116376	148	118	30	LinJ.15:116525-116574	62	72	C(24) > T(12) > A(7) > G(7)	379	379	379	379
LINF_150008700	462	132359	132355	16.8831	+	132010	349	387	4	LinJ.15:132360-132409	72	40	G(20) > C(16) > A(10) > T(4)	357	357	357	357
LINF_150008800	987	134759	134770	28.5714	+	134539	220	50	11	LinJ.15:134760-134809	48	82	T(23) > C(18) > G(6) > A(3)	192	192	192	192
LINF_150008900	1187	137216	137214	26.5375	+	137137	79	234	2	LinJ.15:137217-137266	52	72	T(18) > C(18) > G(8) > A(6)	-	-	482	482
LINF_150009000	885	140976	140969	12.9944	+	140801	175	219	7	LinJ.15:140977-141026	54	40	A(18) > C(15) > G(12) > T(5)	485	484	485	485
LINF_150009100	40113	141953	141951	23.5186	+	141831	122	178	2	LinJ.15:141954-142003	58	26	A(19) > G(18) > C(11) > T(2)	599	599	599	599
LINF_150009400	602	147906	147904	21.2625	+	147654	252	308	2	LinJ.15:147907-147956	66	56	C(25) > A(14) > G(8) > T(3)	-	-	264	-
LINF_150009500	978	150658	150620	22.9039	+	150467	191	210	38	LinJ.15:150659-150708	64	60	C(17) > G(15) > T(13) > A(5)	341	341	341	341
LINF_150009600	1267	152467	152462	12.865	+	151499	968	1049	5	LinJ.15:152468-152517	70	76	C(31) > A(8) > T(7) > G(4)	-	-	348	348
LINF_150009700	491	154524	154532	18.3299	+	154132	392	2903	8	LinJ.15:154525-154574	46	32	A(23) > C(12) > G(11) > T(4)	-	387	387	387
LINF_150012100	141	219843	219831	21.9858	+	219545	298	360	12	LinJ.15:219844-219893	48	50	A(18) > C(17) > T(8) > G(7)	-	-	300	-
LINF_150012200	478	222757	222755	12.7615	+	222385	372	10	2	LinJ.15:222758-222807	56	46	C(15) > A(14) > G(13) > T(8)	-	-	-	-
LINF_150012400	887	228330	228332	16.3472	+	227757	573	623	2	LinJ.15:228331-228380	48	50	A(16) > C(15) > T(10) > G(9)	-	-	-	-
LINF_150012700	485	243267	243231	17.5258	+	242396	871	413	36	LinJ.15:243268-243317	56	50	G(16) > T(13) > C(12) > A(9)	-	-	-	-
LINF_150012800	521	249346	249342	15.547	+	249116	230	272	4	LinJ.15:249347-249396	64	34	G(20) > A(13) > C(12) > T(5)	-	-	350	350
LINF_150012900	986	252220	252218	18.4584	+	251799	421	919	2	LinJ.15:252221-252270	50	46	A(17) > C(15) > G(10) > T(8)	378	378	378	430
LINF_150013000	199	255965	255968	15.5779	+	254740	1225	1268	3	LinJ.15:255966-256015	48	64	T(16) > C(16) > A(10) > G(8)	388	388	388	388
LINF_150013200	2113	259073	259063	31.4245	+	258882	191	198	10	LinJ.15:259074-259123	48	78	T(24) > C(15) > G(9) > A(2)	-	-	-	-
LINF_150013600	882	278623	278616	39.1156	+	278316	307	4179	7	LinJ.15:278624-278673	56	60	T(15) > C(15) > G(13) > A(7)	331	331	331	331
LINF_150013800	136	295931	295939	25.7353	+	294843	1088	3990	8	LinJ.15:295932-295981	54	32	A(17) > G(17) > C(10) > T(6)	-	-	-	-
LINF_150014100	222	314201	314200	7.65766	+	313960	241	198	1	LinJ.15:314202-314251	56	42	G(20) > T(13) > A(9) > C(8)	369	369	369	369
LINF_150014200	905	315619	315608	32.3757	+	315280	339	104	11	LinJ.15:315620-315669	62	70	C(22) > T(13) > G(9) > A(6)	386	386	386	386
LINF_150014300	545	317665	317659	27.3394	+	317500	165	611	6	LinJ.15:317666-317715	54	56	C(18) > A(13) > T(10) > G(9)	-	-	-	-
LINF_150014400	486	322111	322109	15.8436	+	321693	418	576	2	LinJ.15:322112-322161	48	38	A(19) > G(12) > C(12) > T(7)	-	-	-	-
LINF_150014500	182	332940	332932	19.2308	+	332748	192	254	8	LinJ.15:332941-332990	66	58	C(23) > A(11) > G(10) > T(6)	-	-	-	-
LINF_150014600	451	335665	335667	30.1552	+	335324	341	385	2	LinJ.15:335666-335715	54	46	A(14) > C(14) > G(13) > T(9)	420	420	420	420
LINF_150014700	964	337596	337594	35.2697	+	337403	193	542	2	LinJ.15:337597-337646	60	40	G(16) > A(14) > C(14) > T(6)	297	297	297	297
LINF_150014800	648	339770	339769	42.9012	+	339007	763	ND	1	LinJ.15:339771-339820	56	36	G(21) > A(11) > T(11) > C(7)	365	365	365	365
LINF_150015400	432	353626	353525	11.3426	-	354080	454	2456	101	LinJ.15:353577-353626	58	62	C(21) > A(11) > T(10) > G(8)	566	566	566	566
LINF_150015500	141	365323	365324	27.6596	-	366526	1203	3785	1	LinJ.15:365274-365323	54	50	G(16) > T(14) > C(11) > A(9)	-	644	644	644
LINF_150015600	527	369177	369189	10.0569	-	369655	478	528	12	LinJ.15:369128-369177	58	30	A(20) > G(15) > C(14) > T(1)	-	-	-	-
LINF_150015700	1394	371376	371380	22.2382	-	371539	163	236	4	LinJ.15:371327-371376	54	40	G(16) > A(14) > C(11) > T(9)	-	-	-	-
LINF_150015800	983	374038	374037	27.1617	-	374246	208	264	1	LinJ.15:373989-374038	54	24	G(21) > A(17) > T(6) > C(6)	450	450	450	450
LINF_150015900	751	381565	381564	29.2943	-	381798	233	ND	1	LinJ.15:381516-381565	52	40	A(16) > G(14) > C(12) > T(8)	514	-	492	492
LINF_150016300	675	396914	396917	33.9259	-	397045	131	181	3	LinJ.15:396865-396914	56	54	C(17) > A(12) > G(11) > T(10)	-	-	328	328
LINF_150016500	509	402262	402469	8.05501	-	402502	240	46	207	LinJ.15:402213-402262	56	58	C(17) > T(12) > G(11) > A(10)	-	-	-	-
LINF_150016800	1565	411639	411645	10.607	-	411713	74	51	6	LinJ.15:411590-411639	56	52	G(15) > T(13) > C(13) > A(9)	338	310	310	306
LINF_150016900	327	413898	413897	11.6208	-	414689	791	500	1	LinJ.15:413849-413898	64	42	G(16) > C(16) > A(13) > T(5)	292	292	292	292
LINF_150017000	105	418938	418941	48.5714	-	419794	856	3042	3	LinJ.15:418889-418938	50	70	T(22) > C(13) > G(12) > A(3)	-	-	303	303
LINF_150017400	1206	439143	439145	34.3284	-	439454	311	1886	2	LinJ.15:439094-439143	54	44	A(17) > C(16) > G(11) > T(6)	-	-	-	-
LINF_150017600	19697	445385	445398	16.236	-	445767	382	432	13	LinJ.15:445336-445385	52	30	G(20) > A(15) > T(9) > C(6)	-	-	-	-
LINF_150017700	269	448886	448774	10.0372	-	448999	113	1976	112	LinJ.15:448837-448886	56	30	G(21) > A(14) > T(8) > C(7)	363	-	-	-
LINF_150017900	494	452582	452581	29.3522	-	452780	198	249	1	LinJ.15:452533-452582	66	36	G(19) > C(14) > A(13) > T(4)	292	289	289	289
LINF_150018000	1430	455626	455769	14.1958	-	456375	749	1040	143	LinJ.15:455577-455626	64	52	C(18) > G(14) > A(10) > T(8)	-	-	457	-
LINF_150018200	16105	457424	457415	25.1785	-	457528	104	154	9	LinJ.15:457375-457424	50	40	A(19) > C(14) > G(11) > T(6)	374	374	374	374
LINF_150018400	814	466213	466217	18.059	-	466841	628	2587	4	LinJ.15:466164-466213	60	28	A(18) > G(18) > C(12) > T(2)	329	329	329	329
LINF_150018600	1509	471625	471626	31.1465	-	472424	799	1103	1	LinJ.15:471576-471625	64	28	G(22) > A(14) > C(10) > T(4)	-	-	-	-
LINF_150018700	966	473381	473382	16.0455	-	473671	290	142	1	LinJ.15:473332-473381	70	52	C(19) > G(16) > A(8) > T(7)	220	220	220	220
LINF_150018800	2327	474489	474592	18.3068	-	475190	701	554	103	LinJ.15:474440-474489	64	54	C(19) > G(13) > A(10) > T(8)	217	217	292	292
LINF_150018900	1190	476121	476362	14.8739	-	476411	290	142	241	LinJ.15:476072-476121	70	52	C(19) > G(16) > A(8) > T(7)	221	221	221	221
LINF_150019000	1172	478078	478079	18.5154	-	478662	584	822	1	LinJ.15:478029-478078	60	50	G(17) > C(13) > T(12) > A(8)	356	356	440	440
LINF_150019300	325	492721	492730	22.1538	-	493305	584	629	9	LinJ.15:492672-492721	60	50	G(16) > C(14) > T(11) > A(9)	-	-	-	-
LINF_150019800	588	514220	514221	34.0136	-	514779	559	712	1	LinJ.15:514171-514220	62	62	C(23) > A(11) > T(8) > G(8)	-	-	449	449
LINF_150020300	3204	531960	531970	16.0737	-	532162	202	263	10	LinJ.15:531911-531960	58	52	C(16) > G(13) > A(11) > T(10)	331	331	331	331
LINF_150020400	103	533296	533297	28.1553	-	535791	2495	2545	1	LinJ.15:533247-533296	60	42	G(16) > C(14) > A(13) > T(7)	456	456	456	466
LINF_150020500	812	538493	538656	22.4138	-	539004	511	1739	163	LinJ.15:538444-538493	68	70	C(25) > T(10) > G(9) > A(6)	241	241	241	241
LINF_150020700	315	548281	548070	31.1111	-	548917	636	662	211	LinJ.15:548232-548281	52	42	G(15) > A(14) > C(11) > T(10)	-	-	-	-
LINF_150020900	292	559886	559911	29.1096	-	561184	1298	1822	25	LinJ.15:559837-559886	64	54	C(19) > G(13) > A(10) > T(8)	-	-	-	-
LINF_150021100	1202	571901	571888	9.81697	-	572429	528	3044	13	LinJ.15:571852-571901	56	38	A(19) > C(16) > G(12) > T(3)	-	-	-	-
LINF_150021200	334	574273	574293	25.4491	-	574417	144	194	20	LinJ.15:574224-574273	68	56	C(23) > A(11) > G(11) > T(5)	378	378	378	378
LINF_150021400	1090	577636	577641	15.3211	-	577803	167	213	5	LinJ.15:577587-577636	58	28	G(20) > A(16) > C(9) > T(5)	393	393	396	-
LINF_150021700	813	583296	583297	24.7232	-	583417	121	221	1	LinJ.15:583247-583296	64	70	C(23) > T(12) > G(9) > A(6)	269	269	269	269
LINF_150021800	649	585044	585452	16.4869	-	585677	633	700	408	LinJ.15:584995-585044	64	38	G(19) > C(13) > A(12) > T(6)	312	315	312	312
LINF_150022000	830	590420	590422	16.1446	-	590735	315	3373	2	LinJ.15:590371-590420	56	24	A(20) > G(18) > C(10) > T(2)	402	402	402	402
LINF_150022200	1807	593616	593612	15.4953	-	593910	294	339	4	LinJ.15:593567-593616	58	38	G(16) > A(15) > C(13) > T(6)	468	468	468	468
LINF_150022500	867	602073	602074	19.8385	-	602866	793	746	1	LinJ.15:602024-602073	58	48	C(15) > G(14) > A(12) > T(9)	292	292	292	292
LINF_150022600	217	605052	605410	10.5991	-	606230	1178	1228	358	LinJ.15:605003-605052	52	52	C(15) > A(13) > T(11) > G(11)	329	329	329	329
LINF_150022700	832	607585	607581	26.9231	-	607922	337	329	4	LinJ.15:607536-607585	50	46	A(16) > C(14) > G(11) > T(9)	-	340	340	340
LINF_150022750	1987	610005	610006	28.6361	-	610490	485	535	1	LinJ.15:609956-610005	52	80	C(21) > T(19) > A(5) > G(5)	-	276	276	276
LINF_150023000	97	620586	619520	20.6186	-	620967	381	1793	1066	LinJ.15:620537-620586	52	60	T(17) > G(13) > C(13) > A(7)	-	-	262	262
LINF_150023100	308	624539	624541	15.2597	-	625076	537	925	2	LinJ.15:624490-624539	70	48	G(19) > C(16) > T(8) > A(7)	-	-	-	-
LINF_150023200	1049	627517	627521	9.81888	-	627823	306	157	4	LinJ.15:627468-627517	48	36	A(17) > G(15) > T(9) > C(9)	-	-	-	-
LINF_150023300	1354	629219	629217	27.7696	-	629445	226	181	2	LinJ.15:629170-629219	56	46	G(15) > C(13) > A(12) > T(10)	311	317	311	311
LINF_150023400	993	633510	633523	16.2135	-	633595	85	2545	13	LinJ.15:633461-633510	52	48	A(15) > C(15) > G(11) > T(9)	433	433	433	433
LINF_150023600	2385	636576	636623	12.7883	-	636744	168	171	47	LinJ.15:636527-636576	52	68	C(18) > T(16) > A(8) > G(8)	-	-	296	300
LINF_150023700	269	638434	638435	24.9071	-	638781	347	185	1	LinJ.15:638385-638434	60	38	G(18) > A(13) > C(12) > T(7)	310	310	310	310
LINF_160005000	632	914	915	18.1962	-	1614	700	ND	1	LinJ.16:865-914	56	48	G(14) > C(14) > A(12) > T(10)	-	-	-	-
LINF_160005100	1846	2475	2482	16.0888	-	2630	155	160	7	LinJ.16:2426-2475	62	48	C(19) > A(14) > G(12) > T(5)	248	248	248	248
LINF_160005200	1601	4093	4097	33.1043	-	4289	196	68	4	LinJ.16:4044-4093	48	50	T(16) > G(15) > A(10) > C(9)	331	331	331	331
LINF_160005500	776	8642	8655	30.4124	-	8760	118	155	13	LinJ.16:8593-8642	62	36	A(17) > C(16) > G(15) > T(2)	338	338	338	337
LINF_160005600	539	11189	11190	25.4174	-	11692	503	487	1	LinJ.16:11140-11189	62	42	G(18) > C(13) > A(11) > T(8)	410	-	410	410
LINF_160005700	1932	15070	15067	20.1346	-	15161	91	135	3	LinJ.16:15021-15070	54	46	A(21) > C(21) > G(6) > T(2)	-	-	372	372
LINF_160005900	1088	20402	20583	13.0515	-	21043	641	682	181	LinJ.16:20353-20402	56	44	A(14) > G(14) > C(14) > T(8)	-	-	459	459
LINF_160006000	728	21913	21914	31.3187	-	22142	229	253	1	LinJ.16:21864-21913	58	46	G(17) > C(12) > T(11) > A(10)	275	275	275	275
LINF_160006200	231	26656	27191	16.8831	-	28157	1501	1562	535	LinJ.16:26607-26656	46	10	A(26) > G(19) > C(4) > T(1)	-	-	287	287
LINF_160006300	426	31024	31093	24.4131	-	31462	438	403	69	LinJ.16:30975-31024	62	38	G(19) > A(12) > C(12) > T(7)	-	-	-	229
LINF_160006400	605	34363	34361	21.9835	-	34665	302	354	2	LinJ.16:34314-34363	56	32	A(17) > G(17) > C(11) > T(5)	-	-	-	-
LINF_160006500	1864	37753	37731	30.794	-	38304	551	1820	22	LinJ.16:37704-37753	60	44	G(15) > C(15) > A(13) > T(7)	462	462	462	462
LINF_160006800	399	42839	42828	22.3058	-	43068	229	200	11	LinJ.16:42790-42839	68	56	C(22) > G(12) > A(10) > T(6)	239	239	239	239
LINF_160006900	1495	58224	58227	25.6856	-	58939	715	1808	3	LinJ.16:58175-58224	52	68	T(19) > C(15) > G(11) > A(5)	-	-	431	431
LINF_160007000	801	61587	61579	16.2297	-	61977	390	1697	8	LinJ.16:61538-61587	54	54	T(15) > G(15) > C(12) > A(8)	402	402	402	402
LINF_160007100	526	63955	63948	15.7795	-	64762	807	676	7	LinJ.16:63906-63955	58	48	G(18) > T(13) > C(11) > A(8)	363	363	363	363
LINF_160007200	129	69431	69430	13.1783	-	69541	110	2963	1	LinJ.16:69382-69431	66	68	C(23) > T(11) > G(10) > A(6)	-	-	-	-
LINF_160007300	1955	71670	71610	18.3632	-	71833	163	273	60	LinJ.16:71621-71670	62	52	C(16) > G(15) > T(10) > A(9)	-	-	-	-
LINF_160007400	406	72731	72727	22.1675	-	73665	934	699	4	LinJ.16:72682-72731	54	56	T(14) > C(14) > G(13) > A(9)	322	322	322	322
LINF_160007500	876	76425	76426	17.0091	-	76598	173	1573	1	LinJ.16:76376-76425	56	46	C(16) > A(15) > G(12) > T(7)	530	530	530	530
LINF_160007700	483	82966	82965	15.1139	-	83416	450	1382	1	LinJ.16:82917-82966	60	40	A(16) > C(16) > G(14) > T(4)	367	367	346	367
LINF_160007900	205	89284	89286	22.439	-	89785	501	551	2	LinJ.16:89235-89284	62	36	A(18) > C(17) > G(14) > T(1)	-	-	405	405
LINF_160008000	2715	99586	99584	13.0755	-	99835	249	674	2	LinJ.16:99537-99586	54	50	C(15) > A(13) > G(12) > T(10)	-	-	-	-
LINF_160008100	1039	101172	101170	24.9278	-	101177	5	57	2	LinJ.16:101123-101172	60	22	G(24) > A(15) > C(6) > T(5)	375	277	277	375
LINF_160008200	920	105233	105254	17.8261	-	105324	91	1731	21	LinJ.16:105184-105233	64	26	G(22) > A(15) > C(10) > T(3)	479	479	479	479
LINF_160008500	1319	115951	115956	25.9287	-	116241	290	188	5	LinJ.16:115902-115951	58	52	C(16) > G(13) > A(11) > T(10)	230	230	230	230
LINF_160008600	713	117800	117790	15.1473	-	117994	194	285	10	LinJ.16:117751-117800	60	54	C(25) > A(18) > G(5) > T(2)	353	353	353	353
LINF_160009000	419	131881	131885	17.6611	-	132489	608	850	4	LinJ.16:131832-131881	50	38	A(21) > C(15) > G(10) > T(4)	-	-	-	-
LINF_160009200	566	138562	138580	28.7986	-	138887	325	950	18	LinJ.16:138513-138562	64	54	C(19) > G(13) > A(10) > T(8)	471	471	471	471
LINF_160009300	546	141996	141992	15.0183	-	142121	125	892	4	LinJ.16:141947-141996	48	30	A(23) > G(12) > C(12) > T(3)	982	-	982	982
LINF_160009400	763	145111	145114	23.329	-	145946	835	1432	3	LinJ.16:145062-145111	64	40	G(19) > C(13) > A(11) > T(7)	-	-	353	-
LINF_160009500	28	147171	147169	25	-	148519	1348	1400	2	LinJ.16:147122-147171	44	48	A(18) > C(14) > T(10) > G(8)	528	528	528	528
LINF_160009600	1083	154800	154798	15.3278	-	155418	618	2847	2	LinJ.16:154751-154800	50	54	C(14) > T(13) > A(12) > G(11)	-	-	-	-
LINF_160010000	43	170177	170195	25.5814	-	170306	129	3543	18	LinJ.16:170128-170177	58	76	T(19) > C(19) > G(10) > A(2)	-	-	-	-
LINF_160010200	284	176514	176513	13.3803	-	177582	1068	1555	1	LinJ.16:176465-176514	66	52	G(18) > C(15) > T(11) > A(6)	-	-	-	-
LINF_160010400	911	185247	185249	30.1866	-	186378	1131	988	2	LinJ.16:185198-185247	60	46	C(16) > G(14) > A(13) > T(7)	-	-	213	-
LINF_160010600	1083	190462	190464	10.0646	-	190648	186	358	2	LinJ.16:190413-190462	62	42	G(17) > C(14) > A(12) > T(7)	627	627	627	627
LINF_160010700	841	192208	192299	12.8419	-	192802	594	541	91	LinJ.16:192159-192208	56	38	G(17) > A(14) > C(11) > T(8)	408	408	408	408
LINF_160011100	303	199926	199927	16.5017	-	200797	871	918	1	LinJ.16:199877-199926	52	58	C(18) > A(13) > T(11) > G(8)	1246	1246	1246	1246
LINF_160011600	641	217948	217947	21.8409	-	218097	149	200	1	LinJ.16:217899-217948	46	74	T(20) > C(17) > A(7) > G(6)	-	-	-	-
LINF_160011700	1134	220584	220583	28.3069	-	220616	32	87	1	LinJ.16:220535-220584	66	40	C(19) > A(16) > G(14) > T(1)	-	-	340	340
LINF_160011800	608	222962	222824	11.1842	-	223759	797	708	138	LinJ.16:222913-222962	58	42	G(15) > A(14) > C(14) > T(7)	292	292	292	292
LINF_160011900	412	224529	224531	14.8058	-	225045	516	316	2	LinJ.16:224480-224529	64	78	C(29) > T(10) > A(8) > G(3)	320	320	320	320
LINF_160012000	227	226177	226212	13.2159	-	226508	331	217	35	LinJ.16:226128-226177	68	50	G(18) > C(16) > T(9) > A(7)	-	231	231	231
LINF_160012100	200	229284	229159	13	-	230128	844	835	125	LinJ.16:229235-229284	48	52	T(17) > G(15) > A(9) > C(9)	-	-	-	-
LINF_160012200	365	232674	232699	9.86301	-	233677	1003	1053	25	LinJ.16:232625-232674	70	60	C(24) > G(11) > A(9) > T(6)	-	-	-	-
LINF_160012300	939	235580	235585	17.7849	-	236019	439	489	5	LinJ.16:235531-235580	58	18	G(25) > A(16) > T(5) > C(4)	-	-	397	-
LINF_160012400	395	238335	238345	14.4304	-	238485	150	200	10	LinJ.16:238286-238335	58	36	G(21) > A(11) > T(10) > C(8)	445	445	445	445
LINF_160012600	444	245905	246047	13.5135	-	246140	235	141	142	LinJ.16:245856-245905	58	66	C(18) > T(15) > G(11) > A(6)	-	-	-	391
LINF_160012700	611	248419	248458	12.9296	-	248615	196	192	39	LinJ.16:248370-248419	56	46	G(14) > C(14) > A(13) > T(9)	-	-	388	388
LINF_160012900	683	258580	258558	18.448	-	258727	147	357	22	LinJ.16:258531-258580	68	42	G(19) > C(15) > A(10) > T(6)	387	-	387	387
LINF_160013000	315	261686	261688	10.4762	-	263377	1691	2065	2	LinJ.16:261637-261686	58	72	T(18) > C(18) > G(11) > A(3)	665	665	665	665
LINF_160013500	888	293689	293691	8.78378	-	293932	243	709	2	LinJ.16:293640-293689	64	42	G(20) > C(12) > A(9) > T(9)	742	742	742	742
LINF_160013600	1041	297181	297183	23.7272	-	297556	375	425	2	LinJ.16:297132-297181	54	36	G(19) > A(13) > T(10) > C(8)	321	321	321	321
LINF_160013700	537	299751	299754	10.8007	-	300167	416	363	3	LinJ.16:299702-299751	54	52	C(21) > A(18) > G(6) > T(5)	313	313	313	313
LINF_160013800	260	302749	302560	21.1538	-	303452	703	674	189	LinJ.16:302700-302749	54	66	C(19) > T(14) > A(9) > G(8)	498	498	498	498
LINF_160013900	654	305347	305346	20.3364	-	305642	295	465	1	LinJ.16:305298-305347	60	66	C(19) > T(14) > G(11) > A(6)	-	-	752	752
LINF_160014100	3106	311209	311224	9.36896	-	311456	247	297	15	LinJ.16:311160-311209	50	28	A(23) > G(13) > C(12) > T(2)	716	716	716	716
LINF_160014200	149	312746	312859	19.4631	-	313484	738	390	113	LinJ.16:312697-312746	62	54	C(22) > A(14) > G(9) > T(5)	524	524	524	483
LINF_160014300	684	316737	316742	34.9415	-	317153	416	902	5	LinJ.16:316688-316737	58	58	C(19) > A(11) > T(10) > G(10)	-	-	-	-
LINF_160014400	681	318671	318675	16.0059	-	319113	442	494	4	LinJ.16:318622-318671	48	34	A(21) > G(12) > C(12) > T(5)	547	547	547	547
LINF_160014500	419	321517	321514	25.537	-	322205	688	730	3	LinJ.16:321468-321517	34	54	A(18) > T(15) > C(12) > G(5)	-	-	-	-
LINF_160014600	317	323513	323519	16.7192	-	324036	523	573	6	LinJ.16:323464-323513	62	34	G(19) > A(14) > C(12) > T(5)	353	353	353	353
LINF_160014800	1112	331192	331179	17.6259	-	331825	633	100	13	LinJ.16:331143-331192	52	58	C(19) > A(14) > T(10) > G(7)	258	258	258	258
LINF_160014900	1470	338842	338840	20.5442	+	338773	69	119	2	LinJ.16:338843-338892	44	44	A(17) > T(11) > G(11) > C(11)	172	172	172	173
LINF_160015000	5511	339435	339430	29.5409	+	339383	52	98	5	LinJ.16:339436-339485	56	44	A(14) > G(14) > C(14) > T(8)	221	221	221	221
LINF_160015100	1517	341332	341339	18.5234	+	341095	237	67	7	LinJ.16:341333-341382	38	66	T(18) > C(15) > A(13) > G(4)	302	302	302	302
LINF_160015200	982	343401	343399	20.0611	+	343133	268	330	2	LinJ.16:343402-343451	48	54	T(16) > G(13) > C(11) > A(10)	-	-	-	-
LINF_160015600	97	365038	365150	11.3402	+	363139	1899	4584	112	LinJ.16:365039-365088	50	34	G(17) > A(16) > T(9) > C(8)	440	1411	440	440
LINF_160015850	60	389919	389937	16.6667	+	389455	464	3095	18	LinJ.16:389920-389969	52	58	T(16) > G(13) > C(13) > A(8)	-	-	-	-
LINF_160016700	629	433836	433826	23.5294	+	433286	550	3395	10	LinJ.16:433837-433886	50	46	A(15) > C(13) > G(12) > T(10)	-	-	308	308
LINF_160016800	2671	437797	437800	13.1786	+	437612	185	220	3	LinJ.16:437798-437847	46	24	A(21) > G(17) > T(6) > C(6)	262	262	262	262
LINF_160016900	1594	439147	439134	16.4994	+	439005	142	857	13	LinJ.16:439148-439197	56	38	A(17) > G(14) > C(14) > T(5)	-	-	-	-
LINF_160017100	390	439743	439745	36.1538	-	439875	132	ND	2	LinJ.16:439694-439743	70	54	C(23) > G(12) > A(11) > T(4)	-	-	-	-
LINF_160017500	12594	449002	449004	35.5249	-	449512	510	560	2	LinJ.16:448953-449002	70	48	C(21) > G(14) > A(12) > T(3)	465	465	439	465
LINF_160017600	1043	450255	450254	33.3653	-	450845	590	638	1	LinJ.16:450206-450255	68	38	G(20) > C(14) > A(11) > T(5)	441	444	441	444
LINF_160017700	809	453225	453240	11.9901	-	453529	304	352	15	LinJ.16:453176-453225	46	20	A(22) > G(18) > T(5) > C(5)	552	552	552	552
LINF_160017800	856	458901	458883	9.11215	-	459289	388	766	18	LinJ.16:458852-458901	60	40	A(18) > C(18) > G(12) > T(2)	-	-	-	-
LINF_160017900	705	461222	461219	13.617	-	461369	147	508	3	LinJ.16:461173-461222	50	46	A(16) > C(14) > G(11) > T(9)	706	706	706	706
LINF_160018000	354	466091	466092	24.0113	-	466755	664	727	1	LinJ.16:466042-466091	62	44	G(18) > C(13) > A(10) > T(9)	-	-	-	-
LINF_160018100	778	474900	474892	18.509	-	475085	185	1208	8	LinJ.16:474851-474900	54	22	A(21) > G(18) > C(9) > T(2)	565	565	565	565
LINF_160018300	472	488805	488801	16.5254	-	490365	1560	1628	4	LinJ.16:488756-488805	54	56	T(14) > C(14) > G(13) > A(9)	-	-	-	-
LINF_160018400	208	491403	492259	15.8654	-	492015	612	664	856	LinJ.16:491354-491403	62	36	G(18) > A(14) > C(13) > T(5)	477	477	477	477
LINF_160018500	700	498067	498068	23	-	498402	335	385	1	LinJ.16:498018-498067	60	36	G(22) > A(10) > T(10) > C(8)	-	-	-	-
LINF_160018600	5462	506326	506311	32.1311	-	506402	76	126	15	LinJ.16:506277-506326	56	44	A(19) > C(19) > G(9) > T(3)	-	-	-	-
LINF_160018800	923	510505	510487	20.26	-	510688	183	579	18	LinJ.16:510456-510505	48	42	G(15) > A(14) > T(12) > C(9)	-	-	-	-
LINF_160019300	276	540578	540580	22.4638	-	541309	731	787	2	LinJ.16:540529-540578	56	54	C(22) > A(17) > G(6) > T(5)	-	-	31	31
LINF_160019400	87	547500	547538	19.5402	-	548869	1369	1419	38	LinJ.16:547451-547500	54	30	G(19) > A(16) > C(8) > T(7)	-	-	-	-
LINF_160019500	662	551903	551899	32.9305	-	552788	885	1300	4	LinJ.16:551854-551903	48	36	A(19) > G(13) > C(11) > T(7)	-	-	-	-
LINF_160019600	885	553734	553733	11.8644	-	554749	1015	1070	1	LinJ.16:553685-553734	60	36	A(16) > G(16) > C(14) > T(4)	445	445	445	445
LINF_160019700	128	555857	555842	14.0625	-	557568	1711	1770	15	LinJ.16:555808-555857	40	38	A(23) > C(12) > G(8) > T(7)	361	361	361	361
LINF_160019800	1307	561700	561703	30.0689	-	562135	435	1130	3	LinJ.16:561651-561700	50	40	A(17) > G(13) > C(12) > T(8)	-	-	291	291
LINF_160019900	796	563607	563603	26.3819	-	564159	552	611	4	LinJ.16:563558-563607	54	50	C(18) > A(16) > G(9) > T(7)	362	362	362	362
LINF_160020600	1298	590733	590734	29.1217	-	590936	203	511	1	LinJ.16:590684-590733	60	76	C(20) > T(18) > G(10) > A(2)	-	-	-	-
LINF_160021000	424	612542	612538	25	-	613558	1016	2087	4	LinJ.16:612493-612542	50	42	A(19) > C(15) > G(10) > T(6)	-	-	-	-
LINF_160021200	1565	618395	618394	25.4952	-	619052	657	859	1	LinJ.16:618346-618395	60	38	G(17) > A(14) > C(13) > T(6)	-	-	576	576
LINF_160021300	210	620042	620059	26.1905	-	620843	801	858	17	LinJ.16:619993-620042	54	36	A(18) > G(14) > C(13) > T(5)	500	500	500	500
LINF_160021400	854	628695	628700	17.6815	+	628475	220	250	5	LinJ.16:628696-628745	54	38	G(16) > A(15) > C(11) > T(8)	-	-	-	-
LINF_160021600	208	639160	639159	26.9231	+	638533	627	689	1	LinJ.16:639161-639210	50	54	C(20) > A(18) > T(7) > G(5)	-	-	397	397
LINF_160021700	782	642281	642254	30.6905	+	641947	334	351	27	LinJ.16:642282-642331	64	84	C(28) > T(14) > A(4) > G(4)	465	465	465	465
LINF_160021800	798	644193	644404	10.1504	+	643919	274	679	211	LinJ.16:644194-644243	52	68	C(18) > T(16) > A(8) > G(8)	-	-	-	-
LINF_160022000	1856	651342	651352	15.194	+	651170	172	232	10	LinJ.16:651343-651392	52	40	A(17) > G(13) > C(13) > T(7)	-	-	-	-
LINF_160022100	176	655471	655468	29.5455	+	654150	1321	1371	3	LinJ.16:655472-655521	58	34	G(17) > A(16) > C(12) > T(5)	400	400	400	400
LINF_160022200	756	657610	657603	12.6984	+	657032	578	796	7	LinJ.16:657611-657660	60	48	G(16) > C(14) > A(10) > T(10)	559	559	559	559
LINF_160022500	332	668622	668613	18.9759	+	668005	617	1172	9	LinJ.16:668623-668672	58	66	C(18) > T(15) > G(11) > A(6)	-	-	-	-
LINF_160022700	173	684818	684826	12.1387	+	684365	453	503	8	LinJ.16:684819-684868	44	46	A(17) > C(12) > T(11) > G(10)	321	321	321	321
LINF_160022900	1596	685895	685881	14.787	+	685701	194	ND	14	LinJ.16:685896-685945	62	58	C(17) > G(14) > T(12) > A(7)	-	-	-	-
LINF_170005100	590	6808	6813	19.4915	-	7282	474	524	5	LinJ.17:6759-6808	46	56	T(15) > C(13) > A(12) > G(10)	-	-	-	-
LINF_170005200	656	8199	8200	46.3415	-	8493	294	181	1	LinJ.17:8150-8199	46	68	T(18) > C(16) > A(9) > G(7)	237	237	237	237
LINF_170005300	724	9721	9724	14.3646	-	9918	197	238	3	LinJ.17:9672-9721	46	40	A(17) > G(13) > T(10) > C(10)	386	-	386	386
LINF_170005400	250	11387	11376	28.4	-	12281	894	1405	11	LinJ.17:11338-11387	46	64	T(17) > C(15) > A(10) > G(8)	420	420	420	420
LINF_170005500	2114	13550	13548	35.0993	-	13746	196	260	2	LinJ.17:13501-13550	46	34	A(19) > G(14) > C(9) > T(8)	359	359	359	-
LINF_170005700	270	16581	16583	24.8148	-	17589	1008	918	2	LinJ.17:16532-16581	52	56	C(17) > A(13) > T(11) > G(9)	263	215	263	263
LINF_170005800	395	19696	19685	13.6709	-	20354	658	133	11	LinJ.17:19647-19696	68	60	C(22) > G(12) > A(8) > T(8)	-	409	409	409
LINF_170005900	1139	22010	21993	14.8376	-	22810	800	867	17	LinJ.17:21961-22010	46	46	A(14) > T(13) > G(13) > C(10)	503	-	503	503
LINF_170006700	83	40133	40136	13.253	-	40464	331	385	3	LinJ.17:40084-40133	60	40	G(16) > A(14) > C(14) > T(6)	482	482	482	482
LINF_170007600	196	83423	83430	21.9388	-	84209	786	1206	7	LinJ.17:83374-83423	76	48	G(20) > C(18) > A(6) > T(6)	-	-	-	-
LINF_170008000	339	104843	104853	22.7139	-	105203	360	206	10	LinJ.17:104794-104843	62	70	C(20) > T(15) > G(11) > A(4)	-	-	349	349
LINF_170008100	867	108121	108129	18.4544	-	108631	510	1173	8	LinJ.17:108072-108121	56	54	G(18) > T(17) > C(10) > A(5)	-	-	-	-
LINF_170008300	328	115369	115370	16.1585	-	115608	239	1377	1	LinJ.17:115320-115369	60	42	G(17) > C(13) > A(12) > T(8)	392	392	392	392
LINF_170008500	238	121132	121075	18.4874	-	121921	789	839	57	LinJ.17:121083-121132	62	28	G(20) > A(16) > C(11) > T(3)	-	-	405	-
LINF_170008600	79	129250	129237	16.4557	-	129252	2	3369	13	LinJ.17:129201-129250	48	34	A(19) > G(14) > C(10) > T(7)	-	-	-	-
LINF_170008700	429	133232	133235	21.4452	-	133616	384	1860	3	LinJ.17:133183-133232	60	46	G(19) > T(12) > C(11) > A(8)	394	394	394	394
LINF_170008900	116	143645	142647	23.2759	-	144255	610	1681	998	LinJ.17:143596-143645	50	22	A(22) > G(17) > C(8) > T(3)	516	516	516	516
LINF_170009000	1370	147383	147386	44.5985	-	147445	62	112	3	LinJ.17:147334-147383	58	42	G(25) > T(17) > A(4) > C(4)	-	-	-	-
LINF_170009100	120	149346	149345	20.8333	-	151190	1844	2532	1	LinJ.17:149297-149346	50	28	A(18) > G(18) > T(7) > C(7)	647	647	638	647
LINF_170009400	139	157894	157905	17.2662	-	158040	146	492	11	LinJ.17:157845-157894	54	58	T(15) > C(14) > G(13) > A(8)	-	-	-	-
LINF_170009500	510	163522	163530	17.451	-	163784	262	886	8	LinJ.17:163473-163522	52	48	A(13) > G(13) > C(13) > T(11)	-	-	-	474
LINF_170009700	2226	171126	171132	17.1608	-	171316	190	230	6	LinJ.17:171077-171126	56	44	A(14) > G(14) > C(14) > T(8)	-	-	-	-
LINF_170009800	622	173670	173654	19.2926	-	173772	102	1542	16	LinJ.17:173621-173670	58	46	C(16) > A(14) > G(13) > T(7)	771	771	771	771
LINF_170010000	156	177720	177724	17.3077	-	178251	531	1048	4	LinJ.17:177671-177720	72	64	C(24) > G(12) > T(8) > A(6)	469	469	469	-
LINF_170010100	561	181233	181527	14.082	-	181804	571	327	294	LinJ.17:181184-181233	62	48	C(17) > G(14) > A(12) > T(7)	-	-	-	-
LINF_170010600	29	209719	209722	24.1379	-	211071	1352	1315	3	LinJ.17:209670-209719	64	52	C(18) > G(14) > A(10) > T(8)	416	416	416	416
LINF_170010700	91	215973	216086	16.4835	-	216959	986	1166	113	LinJ.17:215924-215973	62	38	G(24) > T(12) > A(7) > C(7)	-	-	-	-
LINF_170010900	601	231149	231137	16.1398	-	231604	455	846	12	LinJ.17:231100-231149	46	22	A(21) > G(18) > T(6) > C(5)	-	-	-	-
LINF_170011200	169	254532	255462	9.46746	-	255957	1425	1872	930	LinJ.17:254483-254532	54	54	C(15) > T(12) > G(12) > A(11)	-	-	-	-
LINF_170011400	316	267463	267471	18.6709	-	267997	534	1503	8	LinJ.17:267414-267463	58	60	C(20) > A(11) > T(10) > G(9)	447	447	438	438
LINF_170011600	297	278713	278717	15.8249	-	279003	290	2568	4	LinJ.17:278664-278713	54	62	C(18) > T(13) > A(10) > G(9)	496	496	496	496
LINF_170011800	688	288741	288743	23.2558	-	289433	692	681	2	LinJ.17:288692-288741	62	42	G(17) > C(14) > A(12) > T(7)	-	-	-	-
LINF_170011900	746	291051	291052	17.1582	-	291280	229	229	1	LinJ.17:291002-291051	64	46	C(18) > G(14) > A(13) > T(5)	388	388	388	388
LINF_170012100	371	297155	297147	26.9542	-	297579	424	515	8	LinJ.17:297106-297155	58	40	G(17) > A(13) > C(12) > T(8)	-	-	-	-
LINF_170012200	240	299242	299239	28.75	-	299502	260	468	3	LinJ.17:299193-299242	62	40	G(16) > C(15) > A(14) > T(5)	-	386	426	-
LINF_170012900	663	330101	330099	15.2338	-	330481	380	716	2	LinJ.17:330052-330101	46	18	A(23) > G(18) > C(5) > T(4)	299	-	299	299
LINF_170013100	476	339174	339167	22.6891	-	339586	412	877	7	LinJ.17:339125-339174	26	36	A(25) > T(12) > G(7) > C(6)	-	-	-	-
LINF_170013200	515	341033	341038	27.3786	-	341344	311	63	5	LinJ.17:340984-341033	54	42	G(20) > T(14) > A(9) > C(7)	-	-	261	258
LINF_170013700	77	352002	352000	24.6753	-	352702	700	6496	2	LinJ.17:351953-352002	52	50	C(16) > A(15) > G(10) > T(9)	-	211	-	-
LINF_170013900	587	359340	359342	32.5383	-	359528	188	348	2	LinJ.17:359291-359340	56	48	G(16) > T(12) > C(12) > A(10)	-	-	594	-
LINF_170014100	72	368144	368137	18.0556	-	369097	953	857	7	LinJ.17:368095-368144	52	34	A(18) > G(15) > C(11) > T(6)	-	-	-	-
LINF_170014300	632	378674	378675	28.7975	-	378840	166	216	1	LinJ.17:378625-378674	66	74	C(26) > T(11) > G(7) > A(6)	-	-	284	-
LINF_170014400	1068	381308	381228	13.2022	-	381445	137	137	80	LinJ.17:381259-381308	58	42	G(16) > A(13) > C(13) > T(8)	428	-	428	428
LINF_170014500	516	383469	383475	44.9612	-	383642	173	387	6	LinJ.17:383420-383469	62	72	C(23) > T(13) > G(8) > A(6)	442	-	442	442
LINF_170014600	356	386568	386554	12.9213	-	386859	291	331	14	LinJ.17:386519-386568	48	26	A(22) > G(15) > C(9) > T(4)	-	-	-	-
LINF_170015100	1326	402905	402812	13.0468	-	403199	294	714	93	LinJ.17:402856-402905	64	56	C(23) > A(13) > G(9) > T(5)	-	-	-	-
LINF_170015400	789	415057	415066	23.7009	-	415338	281	1361	9	LinJ.17:415008-415057	46	36	A(21) > C(12) > G(11) > T(6)	401	401	401	401
LINF_170015500	408	417676	417670	17.6471	-	418102	426	492	6	LinJ.17:417627-417676	48	36	A(22) > C(14) > G(10) > T(4)	419	-	419	419
LINF_170015600	3003	420122	420159	16.5168	-	420410	288	305	37	LinJ.17:420073-420122	34	62	T(22) > A(11) > C(9) > G(8)	289	289	289	289
LINF_170015800	977	425713	425719	19.5496	+	425096	617	2165	6	LinJ.17:425714-425763	44	38	A(18) > G(13) > T(10) > C(9)	305	305	223	305
LINF_170015900	876	429534	429397	15.411	+	429391	143	1426	137	LinJ.17:429535-429584	62	70	C(22) > T(13) > G(9) > A(6)	1175	199	194	199
LINF_170016000	2951	432565	432580	18.1972	+	431294	1271	753	15	LinJ.17:432566-432615	50	50	A(14) > C(14) > T(11) > G(11)	-	-	341	341
LINF_170016600	84	465801	466807	14.2857	+	465246	555	1611	1006	LinJ.17:465802-465851	58	54	G(15) > C(14) > T(13) > A(8)	1443	1443	215	215
LINF_170016700	320	473828	473581	13.125	+	473253	575	873	247	LinJ.17:473829-473878	62	42	G(18) > C(13) > A(11) > T(8)	-	-	497	-
LINF_170016900	1802	478385	478531	21.2542	+	478092	293	2770	146	LinJ.17:478386-478435	60	38	G(16) > A(15) > C(14) > T(5)	-	-	-	-
LINF_170017000	225	500735	500818	22.2222	+	500655	80	217	83	LinJ.17:500736-500785	56	60	C(17) > T(13) > G(11) > A(9)	-	-	533	533
LINF_170017100	425	503968	503980	40.2353	+	503593	375	268	12	LinJ.17:503969-504018	54	66	T(17) > C(16) > G(11) > A(6)	-	-	270	270
LINF_170017200	395	507058	507051	19.4937	+	505693	1365	1108	7	LinJ.17:507059-507108	50	66	C(20) > T(13) > A(12) > G(5)	305	305	305	305
LINF_170017300	227	510594	510603	11.4537	+	509671	923	262	9	LinJ.17:510595-510644	44	46	A(19) > C(14) > T(9) > G(8)	242	242	242	242
LINF_170017700	330	525436	525425	33.3333	+	524132	1304	3254	11	LinJ.17:525437-525486	62	54	G(17) > C(14) > T(13) > A(6)	391	391	261	261
LINF_170018000	416	538734	538737	32.9327	+	538478	256	309	3	LinJ.17:538735-538784	68	46	G(17) > C(17) > A(10) > T(6)	-	-	435	435
LINF_170018200	825	546900	546768	17.8182	+	546597	303	111	132	LinJ.17:546901-546950	58	52	G(16) > T(13) > C(13) > A(8)	-	-	-	-
LINF_170018300	58	553246	553260	22.4138	+	551691	1555	1610	14	LinJ.17:553247-553296	56	50	C(17) > A(14) > G(11) > T(8)	-	411	411	-
LINF_170018600	317	562101	562095	20.5047	+	560278	1823	1713	6	LinJ.17:562102-562151	66	52	C(21) > A(12) > G(12) > T(5)	-	-	-	-
LINF_170019000	285	579679	579512	20.7018	+	579298	381	5858	167	LinJ.17:579680-579729	64	58	C(19) > G(13) > T(10) > A(8)	-	-	-	-
LINF_170019300	235	595614	595624	14.4681	+	594681	933	980	10	LinJ.17:595615-595664	64	72	C(23) > T(13) > G(9) > A(5)	882	-	340	340
LINF_170019400	657	598346	598347	14.7641	+	597999	347	2504	1	LinJ.17:598347-598396	64	52	G(19) > T(13) > C(13) > A(5)	519	-	519	519
LINF_170019500	3673	601855	601845	18.0779	+	601317	538	1483	10	LinJ.17:601856-601905	52	46	A(15) > C(14) > G(12) > T(9)	-	-	-	-
LINF_170019600	516	607774	607775	17.4419	+	607413	361	289	1	LinJ.17:607775-607824	62	42	C(19) > A(17) > G(12) > T(2)	-	-	-	-
LINF_170019700	749	611403	611402	35.514	+	611129	274	280	1	LinJ.17:611404-611453	62	78	C(24) > T(15) > G(7) > A(4)	-	-	-	-
LINF_170019800	352	615806	615804	25.5682	+	615098	708	31	2	LinJ.17:615807-615856	52	46	A(16) > C(15) > G(11) > T(8)	366	-	366	366
LINF_170019900	730	618307	618301	33.8356	+	617701	606	981	6	LinJ.17:618308-618357	54	60	T(15) > C(15) > G(12) > A(8)	170	170	170	170
LINF_170020000	1114	620241	620240	29.2639	+	620014	227	488	1	LinJ.17:620242-620291	58	62	T(16) > C(15) > G(14) > A(5)	577	577	577	577
LINF_170020100	3931	621588	621587	27.7538	+	621180	408	466	1	LinJ.17:621589-621638	52	44	A(18) > C(16) > G(10) > T(6)	-	-	272	272
LINF_170020300	436	627394	627395	23.3945	+	626671	723	774	1	LinJ.17:627395-627444	56	40	G(16) > A(14) > C(12) > T(8)	-	-	-	-
LINF_170020600	2518	640040	640037	18.1493	+	639894	146	493	3	LinJ.17:640041-640090	58	40	G(20) > T(11) > A(10) > C(9)	308	308	308	308
LINF_170021000	422	652300	652303	22.0379	+	651917	383	438	3	LinJ.17:652301-652350	56	32	G(19) > A(15) > C(9) > T(7)	314	314	314	314
LINF_170021100	1246	653483	653479	20.2247	+	653100	383	429	4	LinJ.17:653484-653533	54	34	G(17) > A(16) > C(10) > T(7)	-	-	419	-
LINF_170021300	1473	658810	658812	17.9905	+	658250	560	670	2	LinJ.17:658811-658860	52	64	T(17) > C(15) > G(11) > A(7)	487	487	487	487
LINF_170021400	2108	660576	660574	37.9507	+	660286	290	3140	2	LinJ.17:660577-660626	46	38	A(17) > G(14) > T(10) > C(9)	-	-	256	256
LINF_170021500	728	666233	666210	5.49451	+	665883	350	2638	23	LinJ.17:666234-666283	58	44	C(16) > A(15) > G(13) > T(6)	327	327	327	327
LINF_170021600	1045	670583	670585	23.445	+	670232	351	408	2	LinJ.17:670584-670633	62	32	G(18) > A(16) > C(13) > T(3)	334	334	334	334
LINF_170021700	436	672462	672489	20.4128	+	671714	748	825	27	LinJ.17:672463-672512	50	46	A(14) > G(13) > C(12) > T(11)	417	-	417	417
LINF_170022000	1011	682800	682794	17.8042	+	682586	214	2854	6	LinJ.17:682801-682850	52	66	C(18) > T(15) > A(9) > G(8)	317	317	317	317
LINF_170022200	481	689444	689391	15.3846	+	688414	1030	ND	53	LinJ.17:689445-689494	60	72	C(22) > T(14) > G(8) > A(6)	-	-	-	-
LINF_180005200	935	5869	5870	15.1872	-	6165	296	1523	1	LinJ.18:5820-5869	52	38	G(16) > A(15) > C(10) > T(9)	444	444	319	444
LINF_180005300	4133	7952	7951	20.1065	-	8093	141	195	1	LinJ.18:7903-7952	38	50	A(17) > T(14) > C(11) > G(8)	466	466	466	466
LINF_180005400	1031	9491	9493	34.7236	-	9576	85	124	2	LinJ.18:9442-9491	64	34	A(18) > C(17) > G(15) > T(0)	332	332	332	332
LINF_180005500	166	11849	11855	27.7108	-	12066	217	267	6	LinJ.18:11800-11849	54	56	T(14) > C(14) > G(13) > A(9)	415	415	415	415
LINF_180005600	1326	15490	15493	16.6667	-	15804	314	364	3	LinJ.18:15441-15490	58	56	G(15) > T(14) > C(14) > A(7)	-	-	-	-
LINF_180005700	90	16739	20449	17.7778	-	18512	1773	1650	3710	LinJ.18:16690-16739	38	36	A(18) > G(14) > T(13) > C(5)	251	251	251	251
LINF_180005800	578	21234	21236	27.1626	-	21832	598	648	2	LinJ.18:21185-21234	52	40	A(16) > G(14) > C(12) > T(8)	-	-	-	-
LINF_180005900	745	23966	23968	22.4161	-	24644	678	728	2	LinJ.18:23917-23966	58	38	G(17) > A(14) > C(12) > T(7)	-	306	306	306
LINF_180006000	1433	27696	27683	19.7488	-	27869	173	236	13	LinJ.18:27647-27696	48	40	A(19) > C(13) > G(11) > T(7)	290	-	289	-
LINF_180006100	767	29614	29616	40.5476	-	29731	117	163	2	LinJ.18:29565-29614	60	50	G(17) > C(13) > T(12) > A(8)	263	263	263	263
LINF_180006300	344	36476	36466	38.9535	-	37062	586	646	10	LinJ.18:36427-36476	58	50	C(18) > A(14) > G(11) > T(7)	318	318	318	318
LINF_180006400	151	40153	40745	12.5828	-	41193	1040	1483	592	LinJ.18:40104-40153	62	52	C(16) > G(15) > T(10) > A(9)	-	-	516	-
LINF_180006500	349	44802	44798	15.1862	-	45817	1015	1089	4	LinJ.18:44753-44802	46	36	A(25) > C(16) > G(7) > T(2)	-	-	-	-
LINF_180007000	181	95803	95815	10.4972	-	97671	1868	9515	12	LinJ.18:95754-95803	56	40	G(17) > A(13) > C(11) > T(9)	237	237	237	237
LINF_180007100	1431	100147	100144	26.7645	-	100575	428	481	3	LinJ.18:100098-100147	46	32	A(22) > G(12) > C(11) > T(5)	481	481	481	481
LINF_180007200	309	102499	102538	11.6505	-	103475	976	991	39	LinJ.18:102450-102499	48	40	A(18) > G(12) > C(12) > T(8)	498	498	498	498
LINF_180007300	475	106104	106106	32.6316	-	107117	1013	1875	2	LinJ.18:106055-106104	58	42	G(16) > A(13) > C(13) > T(8)	-	-	-	-
LINF_180007400	738	109574	109571	12.8726	-	109989	415	1359	3	LinJ.18:109525-109574	52	66	T(19) > C(14) > G(12) > A(5)	-	-	285	285
LINF_180007500	1198	111643	111813	15.025	-	111887	244	491	170	LinJ.18:111594-111643	62	44	G(19) > C(12) > T(10) > A(9)	192	192	192	192
LINF_180007600	3116	113143	113146	39.0244	-	113483	340	216	3	LinJ.18:113094-113143	60	50	G(21) > T(16) > C(9) > A(4)	412	412	412	412
LINF_180008100	2131	134008	134022	27.9681	-	134561	553	603	14	LinJ.18:133959-134008	58	44	G(17) > C(12) > A(11) > T(10)	-	457	457	457
LINF_180008200	1337	135445	135446	20.5684	-	135662	217	493	1	LinJ.18:135396-135445	54	84	C(22) > T(20) > G(5) > A(3)	430	430	430	430
LINF_180008300	1376	137108	137067	30.0872	-	137791	683	352	41	LinJ.18:137059-137108	44	52	T(16) > A(12) > G(12) > C(10)	506	506	506	506
LINF_180008400	940	139109	139303	5.42553	-	140165	1056	855	194	LinJ.18:139060-139109	46	58	T(15) > C(14) > A(12) > G(9)	215	215	215	215
LINF_180008500	1091	142017	142155	11.1824	-	142675	658	578	138	LinJ.18:141968-142017	44	68	T(22) > C(12) > G(10) > A(6)	-	-	219	219
LINF_180008800	570	149614	149615	26.8421	-	149699	85	137	1	LinJ.18:149565-149614	66	36	G(19) > C(14) > A(13) > T(4)	-	-	423	-
LINF_180009100	973	167618	167619	17.0606	-	168038	420	1914	1	LinJ.18:167569-167618	58	36	G(18) > A(14) > C(11) > T(7)	-	-	-	-
LINF_180009200	4577	169905	169906	22.4383	-	170097	192	700	1	LinJ.18:169856-169905	58	48	C(15) > G(14) > A(12) > T(9)	471	466	466	466
LINF_180009400	708	178841	178845	36.0169	-	178946	105	7834	4	LinJ.18:178792-178841	62	42	G(16) > C(15) > A(13) > T(6)	-	-	408	-
LINF_180009600	1729	185437	185439	31.0006	-	185663	226	1282	2	LinJ.18:185388-185437	50	64	T(19) > C(13) > G(12) > A(6)	357	357	357	357
LINF_180009700	414	186866	186869	24.1546	-	187415	549	604	3	LinJ.18:186817-186866	50	36	A(20) > C(13) > G(12) > T(5)	449	327	327	327
LINF_180009800	1256	189849	189850	19.586	-	190266	417	473	1	LinJ.18:189800-189849	54	54	C(22) > A(18) > T(5) > G(5)	347	347	347	347
LINF_180009900	1652	191844	191846	19.7942	-	192015	171	51	2	LinJ.18:191795-191844	50	40	A(16) > G(14) > C(11) > T(9)	271	271	271	271
LINF_180010000	778	193519	193506	15.6812	-	193748	229	298	13	LinJ.18:193470-193519	52	22	A(20) > G(19) > C(7) > T(4)	424	424	424	424
LINF_180010500	2002	215871	215822	12.038	-	216053	182	6	49	LinJ.18:215822-215871	44	60	T(18) > C(12) > A(10) > G(10)	-	-	-	-
LINF_180010600	1477	217801	217802	16.8585	-	217955	154	204	1	LinJ.18:217752-217801	40	42	A(22) > C(13) > T(8) > G(7)	323	323	323	323
LINF_180010700	869	224553	224508	11.9678	+	224196	357	362	45	LinJ.18:224554-224603	50	40	A(16) > G(14) > C(11) > T(9)	314	314	314	314
LINF_180010800	1293	226561	226729	11.7556	+	226031	530	4034	168	LinJ.18:226562-226611	36	34	A(26) > C(11) > G(7) > T(6)	-	-	-	-
LINF_180011000	156	240814	240482	23.0769	+	240076	738	693	332	LinJ.18:240815-240864	58	54	C(16) > G(13) > T(11) > A(10)	-	-	-	-
LINF_180011300	1092	248034	248037	22.9853	+	247880	154	407	3	LinJ.18:248035-248084	56	40	A(15) > G(15) > C(13) > T(7)	-	-	470	-
LINF_180011500	1355	254685	254683	33.9483	+	252931	1754	1804	2	LinJ.18:254686-254735	50	40	A(17) > G(13) > C(12) > T(8)	-	-	-	-
LINF_180011600	294	257265	257264	21.4286	+	257165	100	209	1	LinJ.18:257266-257315	70	70	C(26) > T(9) > G(9) > A(6)	-	-	-	-
LINF_180011800	213	267819	267817	25.3521	+	266772	1047	3356	2	LinJ.18:267820-267869	62	42	G(17) > C(14) > A(12) > T(7)	473	473	473	473
LINF_180012000	538	277857	277938	18.7732	+	277702	155	205	81	LinJ.18:277858-277907	56	44	A(19) > C(19) > G(9) > T(3)	-	-	-	-
LINF_180012300	172	296710	296399	13.9535	+	296409	301	3012	311	LinJ.18:296711-296760	60	40	A(17) > C(17) > G(13) > T(3)	575	394	394	394
LINF_180012400	195	302567	302557	40.5128	+	302315	252	70	10	LinJ.18:302568-302617	52	64	C(18) > T(14) > A(10) > G(8)	226	226	226	226
LINF_180012600	497	307268	307271	11.2676	+	306271	997	1165	3	LinJ.18:307269-307318	48	32	A(17) > G(17) > T(9) > C(7)	535	535	535	535
LINF_180012700	600	309769	309767	20.6667	+	309498	271	321	2	LinJ.18:309770-309819	66	42	C(17) > G(16) > A(13) > T(4)	400	400	400	400
LINF_180012800	842	310837	310835	22.6841	+	310615	222	729	2	LinJ.18:310838-310887	60	26	G(19) > A(18) > C(11) > T(2)	-	-	-	-
LINF_180012900	288	317910	317908	24.6528	+	317555	355	401	2	LinJ.18:317911-317960	50	66	C(17) > T(16) > A(9) > G(8)	415	415	184	184
LINF_180013000	1514	319609	319623	46.6975	+	319415	194	259	14	LinJ.18:319610-319659	48	56	T(15) > C(13) > A(11) > G(11)	405	405	345	345
LINF_180013100	1275	321254	321205	20.7843	+	321102	152	340	49	LinJ.18:321255-321304	64	60	C(19) > G(13) > T(11) > A(7)	483	528	483	483
LINF_180013400	541	335063	335061	31.4233	+	334863	200	228	2	LinJ.18:335064-335113	60	44	G(15) > C(15) > A(13) > T(7)	-	-	285	-
LINF_180013500	679	338463	338474	19.5876	+	338260	203	269	11	LinJ.18:338464-338513	56	30	A(20) > G(15) > C(13) > T(2)	-	-	-	-
LINF_180013600	408	346099	345988	13.9706	+	345666	433	478	111	LinJ.18:346100-346149	40	50	T(18) > G(13) > A(12) > C(7)	-	-	-	-
LINF_180013800	587	360124	360121	17.5468	+	360069	55	105	3	LinJ.18:360125-360174	62	36	A(16) > G(16) > C(15) > T(3)	-	-	255	255
LINF_180014000	457	363087	363128	14.8796	+	362381	706	782	41	LinJ.18:363088-363137	44	46	A(18) > C(13) > T(10) > G(9)	-	-	385	-
LINF_180014100	1014	367150	367149	37.9684	+	367027	123	75	1	LinJ.18:367151-367200	50	44	A(17) > C(14) > G(11) > T(8)	263	263	263	263
LINF_180014200	910	368887	368888	19.2308	+	368244	643	1672	1	LinJ.18:368888-368937	50	56	T(20) > G(17) > C(8) > A(5)	-	-	623	623
LINF_180014300	460	373603	373597	8.47826	+	373170	433	113	6	LinJ.18:373604-373653	60	64	C(24) > A(12) > T(8) > G(6)	-	-	-	-
LINF_180014400	587	377803	377801	23.339	+	377563	240	285	2	LinJ.18:377804-377853	60	26	G(21) > A(16) > C(9) > T(4)	384	407	364	384
LINF_180014500	1946	380281	380275	31.963	+	380165	116	181	6	LinJ.18:380282-380331	68	68	C(25) > T(9) > G(9) > A(7)	-	-	-	-
LINF_180014800	781	390268	390273	11.7798	+	390084	184	573	5	LinJ.18:390269-390318	54	40	A(17) > C(14) > G(13) > T(6)	-	-	302	302
LINF_180015000	181	400853	400748	20.442	+	400223	630	386	105	LinJ.18:400854-400903	62	64	C(23) > A(10) > T(9) > G(8)	337	337	239	337
LINF_180015100	871	402281	402280	27.7842	+	401798	483	989	1	LinJ.18:402282-402331	52	48	G(17) > T(15) > A(9) > C(9)	355	355	355	355
LINF_180015200	1730	404951	404950	36.763	+	404755	196	73	1	LinJ.18:404952-405001	60	46	G(16) > C(14) > A(11) > T(9)	-	-	-	247
LINF_180015300	630	407759	407761	21.5873	+	406977	782	839	2	LinJ.18:407760-407809	56	28	G(20) > A(16) > C(8) > T(6)	381	381	381	381
LINF_180015700	241	423936	423977	29.4606	+	423528	408	984	41	LinJ.18:423937-423986	56	50	C(15) > G(13) > A(12) > T(10)	-	-	-	-
LINF_180015900	554	434903	434906	19.8556	+	434898	5	5810	3	LinJ.18:434904-434953	66	60	C(22) > G(11) > A(9) > T(8)	-	-	-	-
LINF_180016100	536	447300	447194	11.0075	+	446916	384	442	106	LinJ.18:447301-447350	48	44	A(14) > G(14) > T(12) > C(10)	-	-	-	-
LINF_180016400	532	457147	457141	18.797	+	456703	444	362	6	LinJ.18:457148-457197	42	48	A(16) > T(13) > C(11) > G(10)	-	-	-	288
LINF_180016500	695	460215	460223	31.223	+	460028	187	676	8	LinJ.18:460216-460265	60	52	C(17) > G(13) > A(11) > T(9)	-	-	-	-
LINF_180016600	175	462955	462961	22.2857	+	462192	763	573	6	LinJ.18:462956-463005	48	50	A(16) > C(15) > T(10) > G(9)	-	-	458	-
LINF_180016900	347	473886	474068	20.7493	+	473785	101	324	182	LinJ.18:473887-473936	62	30	G(24) > A(11) > T(8) > C(7)	-	-	-	-
LINF_180017100	377	484953	484951	11.4058	+	483460	1493	2265	2	LinJ.18:484954-485003	48	26	A(21) > G(16) > C(8) > T(5)	621	621	621	621
LINF_180017200	1319	487476	487638	21.6831	+	486949	527	491	162	LinJ.18:487477-487526	70	56	C(22) > G(13) > A(9) > T(6)	-	-	-	-
LINF_180017400	535	498069	498068	34.0187	+	497897	172	216	1	LinJ.18:498070-498119	68	28	G(25) > A(11) > C(9) > T(5)	356	381	354	356
LINF_180017500	703	499992	500082	15.6472	+	499308	684	637	90	LinJ.18:499993-500042	60	46	G(17) > C(13) > A(10) > T(10)	-	-	-	-
LINF_180017600	166	503885	504630	13.8554	+	502966	919	1714	745	LinJ.18:503886-503935	56	54	G(17) > T(16) > C(11) > A(6)	-	-	-	-
LINF_180017800	862	510816	510815	17.0534	+	510494	322	1452	1	LinJ.18:510817-510866	54	44	A(16) > C(15) > G(12) > T(7)	379	379	379	379
LINF_180017900	650	515091	515086	12.7692	+	514621	470	1260	5	LinJ.18:515092-515141	64	48	C(22) > A(16) > G(10) > T(2)	383	383	378	383
LINF_180018400	1250	533587	533586	20.32	+	533376	211	230	1	LinJ.18:533588-533637	52	40	A(15) > G(15) > C(11) > T(9)	-	-	-	-
LINF_180018500	99	539391	539394	27.2727	+	538723	668	3325	3	LinJ.18:539392-539441	62	28	G(19) > A(17) > C(12) > T(2)	368	368	368	368
LINF_180018600	278	544849	544846	13.6691	+	544286	563	4311	3	LinJ.18:544850-544899	54	50	G(18) > T(16) > C(9) > A(7)	-	-	403	303
LINF_180019200	595	591684	590850	10.4202	+	590161	1523	1573	834	LinJ.18:591685-591734	54	38	A(19) > C(15) > G(12) > T(4)	631	631	517	517
LINF_180019300	3066	593667	593671	18.0691	+	593606	61	105	4	LinJ.18:593668-593717	48	36	A(20) > G(12) > C(12) > T(6)	439	439	439	439
LINF_180019400	13143	595001	594999	20.2617	+	594713	288	336	2	LinJ.18:595002-595051	58	42	A(19) > C(19) > G(10) > T(2)	-	-	-	-
LINF_180019800	80	619679	619677	40	+	618075	1604	1406	2	LinJ.18:619680-619729	62	74	C(25) > T(12) > A(7) > G(6)	198	198	198	198
LINF_180019900	757	621819	621813	20.8719	+	620846	973	5117	6	LinJ.18:621820-621869	56	56	C(16) > T(12) > G(12) > A(10)	-	-	-	-
LINF_180020000	306	633480	633482	22.2222	+	633053	427	4834	2	LinJ.18:633481-633530	62	52	C(19) > A(12) > G(12) > T(7)	-	-	287	287
LINF_180020200	664	643813	643811	17.6205	+	643145	668	1320	2	LinJ.18:643814-643863	56	24	A(20) > G(18) > C(10) > T(2)	285	285	285	285
LINF_180020300	197	647494	647493	18.7817	+	645633	1861	1757	1	LinJ.18:647495-647544	58	44	G(18) > T(11) > C(11) > A(10)	300	300	300	300
LINF_180020900	922	675765	675645	12.7983	+	675462	303	227	120	LinJ.18:675766-675815	58	70	C(20) > T(15) > G(9) > A(6)	264	264	264	264
LINF_180021000	1069	677579	677569	15.8092	+	677300	279	37	10	LinJ.18:677580-677629	60	58	G(15) > C(15) > T(14) > A(6)	203	203	203	203
LINF_180021100	2097	679386	679306	17.2151	+	679150	236	228	80	LinJ.18:679387-679436	66	44	C(20) > A(15) > G(13) > T(2)	375	375	375	375
LINF_180021300	691	684231	684230	17.6556	+	683920	311	1795	1	LinJ.18:684232-684281	52	62	T(18) > G(13) > C(13) > A(6)	444	444	444	444
LINF_180021400	939	688215	688213	13.312	+	687204	1011	1690	2	LinJ.18:688216-688265	56	52	G(17) > T(15) > C(11) > A(7)	331	-	331	-
LINF_180021500	330	691278	691285	17.2727	+	690304	974	1038	7	LinJ.18:691279-691328	56	50	G(14) > C(14) > A(11) > T(11)	-	-	456	-
LINF_180022000	1877	704425	704306	23.2818	+	704205	220	210	119	LinJ.18:704426-704475	48	58	T(15) > C(14) > A(11) > G(10)	319	319	319	319
LINF_180022100	3201	706005	706010	25.1796	+	705393	612	670	5	LinJ.18:706006-706055	42	26	A(29) > C(13) > G(8) > T(0)	470	470	357	357
LINF_180022400	304	716128	716120	19.4079	+	714186	1942	1975	8	LinJ.18:716129-716178	54	54	T(14) > G(14) > C(13) > A(9)	-	-	367	367
LINF_180022500	303	718952	718965	14.8515	+	718555	397	ND	13	LinJ.18:718953-719002	48	42	A(17) > G(12) > C(12) > T(9)	-	-	-	-
LINF_190005000	1373	896	901	21.7771	-	1185	289	ND	5	LinJ.19:847-896	44	32	A(19) > G(15) > T(9) > C(7)	-	-	-	-
LINF_190005100	1867	2609	2912	9.96251	-	3348	739	487	303	LinJ.19:2560-2609	56	56	C(15) > T(13) > G(13) > A(9)	280	280	280	280
LINF_190005200	66849	4953	4954	59.5102	-	5171	218	268	1	LinJ.19:4904-4953	58	44	G(18) > T(11) > C(11) > A(10)	352	352	352	352
LINF_190005300	35314	5809	5811	42.915	-	6030	221	2	2	LinJ.19:5760-5809	56	56	C(17) > A(11) > T(11) > G(11)	241	241	246	241
LINF_190005400	50448	6819	6822	36.9113	-	6933	114	158	3	LinJ.19:6770-6819	44	54	T(16) > A(12) > G(11) > C(11)	183	185	216	216
LINF_190005700	1703	13407	13361	13.6817	-	13826	419	157	46	LinJ.19:13358-13407	52	64	T(17) > C(15) > G(11) > A(7)	-	-	-	-
LINF_190005800	1984	16029	16011	10.4335	-	16847	818	861	18	LinJ.19:15980-16029	46	40	A(19) > C(12) > G(11) > T(8)	570	570	570	570
LINF_190005900	402	18286	18288	16.4179	-	19106	820	870	2	LinJ.19:18237-18286	54	44	G(15) > A(13) > C(12) > T(10)	395	395	395	395
LINF_190006100	1146	22326	22328	26.4398	-	22702	376	426	2	LinJ.19:22277-22326	44	28	A(20) > G(16) > T(8) > C(6)	253	253	253	253
LINF_190006300	45	27410	27416	24.4444	-	28810	1400	1457	6	LinJ.19:27361-27410	38	30	A(22) > G(13) > T(9) > C(6)	-	-	467	467
LINF_190006400	2009	31171	31177	20.8064	-	31944	773	1471	6	LinJ.19:31122-31171	44	42	A(23) > C(16) > G(6) > T(5)	-	-	-	-
LINF_190006900	1200	54659	54660	20.8333	-	55617	958	4123	1	LinJ.19:54610-54659	52	32	A(19) > G(15) > C(11) > T(5)	-	-	-	-
LINF_190007000	182	56978	56979	37.9121	-	57979	1001	1055	1	LinJ.19:56929-56978	50	44	A(15) > G(13) > C(12) > T(10)	337	337	337	337
LINF_190007200	715	73844	73842	8.25175	+	73422	422	1018	2	LinJ.19:73845-73894	40	44	A(17) > T(13) > G(11) > C(9)	559	559	559	559
LINF_190007300	37	78195	78194	35.1351	+	77749	446	1703	1	LinJ.19:78196-78245	50	54	T(14) > C(13) > G(12) > A(11)	-	-	-	-
LINF_190007400	303	83073	84241	12.5413	+	82741	332	6529	1168	LinJ.19:83074-83123	46	26	A(20) > G(17) > T(7) > C(6)	-	-	-	-
LINF_190007800	84	107207	107189	15.4762	+	107006	201	3857	18	LinJ.19:107208-107257	54	70	T(18) > C(17) > G(10) > A(5)	-	-	-	-
LINF_190007900	61	114443	115100	16.3934	+	112689	1754	1963	657	LinJ.19:114444-114493	58	18	G(24) > A(17) > C(5) > T(4)	-	-	940	-
LINF_190008100	390	121764	121753	16.6667	+	120951	813	1610	11	LinJ.19:121765-121814	48	38	A(19) > G(12) > C(12) > T(7)	-	-	-	-
LINF_190008200	532	125453	125450	37.782	+	124840	613	663	3	LinJ.19:125454-125503	66	36	G(17) > C(16) > A(15) > T(2)	464	464	464	464
LINF_190008300	723	128407	128031	13.6929	+	127630	777	1445	376	LinJ.19:128408-128457	50	46	A(16) > C(14) > G(11) > T(9)	517	-	517	517
LINF_190008400	1344	131396	131395	23.5863	+	131092	304	1861	1	LinJ.19:131397-131446	54	34	G(19) > A(14) > T(9) > C(8)	617	617	617	617
LINF_190008600	42	150175	150178	21.4286	+	149073	1102	3794	3	LinJ.19:150176-150225	46	32	A(20) > G(14) > C(9) > T(7)	-	-	679	-
LINF_190008700	411	159697	159695	40.146	+	159140	557	607	2	LinJ.19:159698-159747	54	36	A(16) > G(16) > C(11) > T(7)	316	316	316	316
LINF_190009100	2147	166567	166563	16.1621	+	166506	61	67	4	LinJ.19:166568-166617	66	52	G(17) > C(16) > T(10) > A(7)	-	-	-	-
LINF_190009200	542	171389	171388	14.2066	+	171002	387	132	1	LinJ.19:171390-171439	58	50	C(17) > A(13) > G(12) > T(8)	222	222	12	222
LINF_190009300	2002	173493	173478	17.6823	+	172804	689	724	15	LinJ.19:173494-173543	58	46	C(19) > A(17) > G(10) > T(4)	-	-	421	-
LINF_190009400	419	178254	178255	10.5012	+	177299	955	1012	1	LinJ.19:178255-178304	54	20	A(22) > G(18) > C(9) > T(1)	477	477	477	477
LINF_190009500	706	180221	180141	22.8045	+	179931	290	46	80	LinJ.19:180222-180271	56	52	C(15) > G(13) > A(11) > T(11)	218	218	218	218
LINF_190009800	3435	188893	188886	28.9374	+	188581	312	373	7	LinJ.19:188894-188943	50	38	G(18) > A(13) > T(12) > C(7)	448	448	448	448
LINF_190009900	2574	190860	190856	28.6713	+	190634	226	938	4	LinJ.19:190861-190910	52	48	G(14) > A(12) > T(12) > C(12)	410	410	410	410
LINF_190010000	1010	196852	196850	20.8911	+	196757	95	62	2	LinJ.19:196853-196902	64	72	C(21) > T(15) > G(11) > A(3)	361	361	361	-
LINF_190010300	96	211373	211374	22.9167	+	209326	2047	2062	1	LinJ.19:211374-211423	52	46	A(14) > G(13) > C(13) > T(10)	-	-	-	-
LINF_190010400	680	216895	216868	25.7353	+	216495	400	1448	27	LinJ.19:216896-216945	52	66	C(20) > T(13) > A(11) > G(6)	364	364	364	364
LINF_190010700	339	242554	242555	43.0678	+	242178	376	5380	1	LinJ.19:242555-242604	54	50	G(15) > T(13) > C(12) > A(10)	-	-	-	-
LINF_190011100	908	272386	272385	18.3921	+	272247	139	189	1	LinJ.19:272387-272436	58	44	C(15) > A(14) > G(14) > T(7)	351	351	351	351
LINF_190011200	616	274176	274180	17.2078	+	273374	802	1137	4	LinJ.19:274177-274226	46	40	A(23) > C(16) > G(7) > T(4)	-	-	-	762
LINF_190011300	470	278792	278779	14.2553	+	278215	577	627	13	LinJ.19:278793-278842	58	50	G(15) > C(14) > T(11) > A(10)	-	-	-	-
LINF_190011400	270	285754	285731	18.5185	+	285321	433	471	23	LinJ.19:285755-285804	64	36	A(16) > G(16) > C(16) > T(2)	465	-	465	465
LINF_190011500	739	288187	288186	28.5521	+	287706	481	2893	1	LinJ.19:288188-288237	62	42	C(18) > A(16) > G(13) > T(3)	511	511	-	-
LINF_190011800	41	304143	304201	19.5122	+	303974	169	3112	58	LinJ.19:304144-304193	66	68	C(20) > T(14) > G(13) > A(3)	-	-	-	-
LINF_190012100	789	320944	320946	19.3916	+	320041	903	969	2	LinJ.19:320945-320994	58	52	C(16) > G(13) > A(11) > T(10)	-	-	444	-
LINF_190012200	225	324541	324564	25.3333	+	323166	1375	1188	23	LinJ.19:324542-324591	58	68	C(18) > T(16) > G(11) > A(5)	390	390	390	390
LINF_190012300	1434	326891	326854	24.477	+	326440	451	289	37	LinJ.19:326892-326941	60	38	G(21) > A(10) > T(10) > C(9)	254	254	254	254
LINF_190012700	2539	335552	335548	22.2922	+	335335	217	283	4	LinJ.19:335553-335602	52	60	C(22) > A(16) > T(8) > G(4)	394	394	394	394
LINF_190012800	651	338594	338604	22.427	+	338293	301	351	10	LinJ.19:338595-338644	52	56	C(16) > A(12) > T(12) > G(10)	-	-	-	-
LINF_190012900	67	342655	342671	20.8955	+	340982	1673	1900	16	LinJ.19:342656-342705	52	48	A(14) > C(14) > G(12) > T(10)	-	-	-	466
LINF_190013000	1003	346939	346937	25.5234	+	346346	593	643	2	LinJ.19:346940-346989	48	48	A(18) > C(16) > T(8) > G(8)	189	189	189	189
LINF_190013200	1992	349300	349302	28.8153	+	348882	418	276	2	LinJ.19:349301-349350	62	60	C(27) > A(16) > G(4) > T(3)	249	249	249	249
LINF_190013300	1670	350388	350390	29.3413	+	349969	419	140	2	LinJ.19:350389-350438	62	60	C(27) > A(16) > G(4) > T(3)	248	248	248	248
LINF_190013900	743	362550	362557	63.7954	+	361487	1063	1716	7	LinJ.19:362551-362600	54	34	G(17) > A(16) > C(10) > T(7)	-	-	-	-
LINF_190014000	51	364103	364106	25.4902	+	363993	110	140	3	LinJ.19:364104-364153	48	64	T(21) > G(13) > C(11) > A(5)	-	-	-	-
LINF_190014300	123	369701	369704	33.3333	+	368653	1048	1123	3	LinJ.19:369702-369751	48	34	A(20) > G(13) > C(11) > T(6)	-	-	-	-
LINF_190014600	874	382294	382298	16.1327	+	381963	331	381	4	LinJ.19:382295-382344	52	34	A(17) > G(16) > C(10) > T(7)	-	-	306	569
LINF_190014700	1645	385590	385591	11.8541	+	385374	216	267	1	LinJ.19:385591-385640	80	64	C(29) > G(11) > A(7) > T(3)	332	332	332	332
LINF_190014800	1836	386652	386658	20.207	+	386402	250	298	6	LinJ.19:386653-386702	48	42	A(17) > G(12) > C(12) > T(9)	495	495	495	495
LINF_190014900	1456	388746	388743	8.03571	+	387921	825	2437	3	LinJ.19:388747-388796	54	28	G(21) > A(15) > T(8) > C(6)	174	174	174	174
LINF_190015000	139	394782	394336	11.5108	+	393864	918	4320	446	LinJ.19:394783-394832	42	28	A(26) > C(11) > G(10) > T(3)	177	177	177	177
LINF_190015700	329	427732	427730	10.9422	+	426570	1162	1782	2	LinJ.19:427733-427782	62	32	G(19) > A(15) > C(12) > T(4)	-	-	-	-
LINF_190016000	209	446371	446694	11.9617	+	445721	650	700	323	LinJ.19:446372-446421	58	28	G(19) > A(17) > C(10) > T(4)	-	-	-	-
LINF_190016100	222	459186	459185	20.2703	+	458910	276	319	1	LinJ.19:459187-459236	58	46	G(20) > T(14) > C(9) > A(7)	423	423	423	423
LINF_190016300	1046	461650	461653	22.5621	+	461165	485	545	3	LinJ.19:461651-461700	50	26	A(21) > G(16) > C(9) > T(4)	-	-	-	-
LINF_190016600	502	472831	472455	12.3506	+	471733	1098	1657	376	LinJ.19:472832-472881	68	62	C(22) > G(12) > T(9) > A(7)	-	-	-	511
LINF_190016700	324	491606	491587	17.9012	+	491304	302	1638	19	LinJ.19:491607-491656	54	44	A(14) > G(14) > C(13) > T(9)	-	-	-	-
LINF_190017300	947	522809	522800	15.7339	+	521930	879	770	9	LinJ.19:522810-522859	62	44	G(17) > C(14) > A(11) > T(8)	320	257	320	320
LINF_190018100	1257	545329	545325	18.1384	+	545100	229	279	4	LinJ.19:545330-545379	64	34	G(19) > A(14) > C(13) > T(4)	326	326	326	326
LINF_190018200	513	547932	547930	27.2904	+	546733	1199	1406	2	LinJ.19:547933-547982	40	38	A(20) > G(11) > T(10) > C(9)	-	-	622	-
LINF_190018600	996	567043	567040	13.4538	+	566272	771	2023	3	LinJ.19:567044-567093	58	48	G(18) > T(13) > C(11) > A(8)	-	339	-	339
LINF_190018700	59	571084	571082	30.5085	+	570051	1033	1629	2	LinJ.19:571085-571134	60	30	G(23) > A(12) > T(8) > C(7)	-	-	-	-
LINF_190018900	167	580020	580017	26.3473	+	579824	196	187	3	LinJ.19:580021-580070	62	40	G(24) > T(13) > C(7) > A(6)	-	-	285	-
LINF_190019000	60	583975	583973	35	+	582942	1033	1629	2	LinJ.19:583976-584025	60	30	G(23) > A(12) > T(8) > C(7)	-	-	366	-
LINF_190019200	77	592907	592897	27.2727	+	592711	196	187	10	LinJ.19:592908-592957	62	40	G(24) > T(13) > C(7) > A(6)	-	-	-	-
LINF_190019700	904	608856	608852	8.62832	+	607969	887	4636	4	LinJ.19:608857-608906	56	54	C(21) > A(16) > G(7) > T(6)	-	-	675	675
LINF_190019800	171	614834	614818	11.1111	+	614077	757	852	16	LinJ.19:614835-614884	54	48	G(14) > C(13) > A(12) > T(11)	535	535	535	535
LINF_190019900	1145	616279	617081	16.5066	+	615855	424	584	802	LinJ.19:616280-616329	52	44	A(14) > G(14) > C(12) > T(10)	1160	-	-	1160
LINF_190020000	102	619272	619270	27.451	+	617998	1274	1426	2	LinJ.19:619273-619322	62	28	G(20) > A(16) > C(11) > T(3)	-	-	-	-
LINF_190020200	959	628087	628076	13.243	+	627604	483	520	11	LinJ.19:628088-628137	52	58	T(16) > G(13) > C(13) > A(8)	417	417	417	417
LINF_190020300	396	629909	629906	24.4949	+	629559	350	407	3	LinJ.19:629910-629959	50	44	A(17) > C(14) > G(11) > T(8)	368	368	368	368
LINF_190020400	2523	631693	631696	20.9671	+	631115	578	1496	3	LinJ.19:631694-631743	46	66	T(18) > C(15) > A(9) > G(8)	300	300	300	300
LINF_190020500	487	636578	636576	21.1499	+	636134	444	541	2	LinJ.19:636579-636628	52	60	T(15) > C(15) > G(11) > A(9)	307	307	307	307
LINF_190020800	792	649150	649191	9.34343	+	649135	15	52	41	LinJ.19:649151-649200	44	64	T(16) > C(16) > A(12) > G(6)	226	226	226	226
LINF_190021000	3588	652704	652703	15.1895	+	652660	44	528	1	LinJ.19:652705-652754	38	38	A(19) > T(12) > G(12) > C(7)	237	237	237	237
LINF_190021350	403	661800	661798	19.603	+	660995	805	855	2	LinJ.19:661801-661850	48	32	A(23) > C(13) > G(11) > T(3)	259	263	259	-
LINF_190021500	97	667240	667235	25.7732	+	665429	1811	1938	5	LinJ.19:667241-667290	60	62	C(17) > T(14) > G(13) > A(6)	-	-	-	-
LINF_190021600	442	671063	671086	10.4072	+	670694	369	442	23	LinJ.19:671064-671113	60	48	C(17) > A(13) > G(13) > T(7)	353	353	353	353
LINF_190021700	863	673339	673338	29.2005	+	673071	268	3807	1	LinJ.19:673340-673389	58	54	C(21) > A(15) > G(8) > T(6)	-	-	675	-
LINF_190022000	590	686331	685864	10	+	685154	1177	1130	467	LinJ.19:686332-686381	46	68	C(18) > T(16) > A(11) > G(5)	-	-	422	425
LINF_190022100	590	688344	688345	15.9322	+	687939	405	88	1	LinJ.19:688345-688394	50	44	G(17) > T(14) > A(11) > C(8)	316	316	316	316
LINF_190022300	1153	693009	693010	23.8508	+	692764	245	414	1	LinJ.19:693010-693059	62	44	G(16) > C(15) > A(12) > T(7)	448	448	448	448
LINF_190022400	1713	694315	694326	23.2341	+	694107	208	272	11	LinJ.19:694316-694365	56	36	A(17) > G(15) > C(13) > T(5)	432	432	432	432
LINF_190022500	1212	695903	695822	8.33333	+	695836	67	107	81	LinJ.19:695904-695953	54	48	G(14) > C(13) > A(12) > T(11)	358	358	346	346
LINF_190022600	1003	697326	697324	28.6142	+	697228	98	156	2	LinJ.19:697327-697376	54	42	G(15) > A(14) > C(12) > T(9)	226	226	226	226
LINF_200005000	514	1746	1656	16.9261	-	1822	76	ND	90	LinJ.20:1697-1746	48	52	T(14) > A(12) > G(12) > C(12)	-	-	-	-
LINF_200005200	653	7558	7561	28.9433	-	8094	536	586	3	LinJ.20:7509-7558	54	38	A(16) > G(15) > C(12) > T(7)	390	390	390	390
LINF_200005400	388	13157	13154	22.1649	-	13413	256	309	3	LinJ.20:13108-13157	50	58	C(17) > A(13) > T(12) > G(8)	-	-	-	-
LINF_200005600	738	17226	17227	25.8808	-	17316	90	601	1	LinJ.20:17177-17226	56	50	G(18) > T(15) > C(10) > A(7)	392	392	392	-
LINF_200005700	1529	21753	21546	31.5893	-	21864	111	746	207	LinJ.20:21704-21753	60	44	G(15) > C(15) > A(13) > T(7)	-	-	-	-
LINF_200006000	399	32240	32241	24.812	-	34084	1844	1904	1	LinJ.20:32191-32240	58	46	G(16) > C(13) > A(11) > T(10)	-	-	-	-
LINF_200006100	1152	36244	36242	22.8299	-	36948	704	693	2	LinJ.20:36195-36244	50	52	C(20) > A(19) > T(6) > G(5)	-	-	-	-
LINF_200006200	551	40377	40384	23.049	-	40929	552	2139	7	LinJ.20:40328-40377	64	64	C(18) > T(14) > G(14) > A(4)	429	429	429	429
LINF_200006300	592	43080	43076	13.0068	-	43567	487	557	4	LinJ.20:43031-43080	54	40	A(17) > C(14) > G(13) > T(6)	357	357	357	357
LINF_200006400	135	45488	45490	11.8519	-	46672	1184	1225	2	LinJ.20:45439-45488	52	54	T(15) > G(14) > C(12) > A(9)	-	354	357	354
LINF_200006700	646	59589	59596	29.8762	-	60027	438	312	7	LinJ.20:59540-59589	56	52	C(17) > A(13) > G(11) > T(9)	-	-	-	-
LINF_200007000	799	66826	66825	33.5419	-	66998	172	244	1	LinJ.20:66777-66826	60	32	A(18) > G(16) > C(14) > T(2)	394	394	394	394
LINF_200007100	773	70225	70227	30.7891	-	70422	197	179	2	LinJ.20:70176-70225	58	60	C(16) > T(14) > G(13) > A(7)	406	406	406	406
LINF_200007200	67	72461	72460	17.9104	-	74481	2020	2083	1	LinJ.20:72412-72461	56	30	G(18) > A(17) > C(10) > T(5)	386	-	386	385
LINF_200007400	1873	79580	79581	37.1596	-	79859	279	329	1	LinJ.20:79531-79580	60	44	G(16) > C(14) > A(12) > T(8)	431	431	431	431
LINF_200007500	759	81117	81281	22.5296	-	81404	287	355	164	LinJ.20:81068-81117	50	34	A(18) > G(15) > C(10) > T(7)	294	294	294	294
LINF_200007600	104	83606	83603	20.1923	-	84617	1011	1518	3	LinJ.20:83557-83606	62	32	G(19) > A(15) > C(12) > T(4)	622	622	509	509
LINF_200007700	791	101267	101266	14.4121	+	101205	62	87	1	LinJ.20:101268-101317	42	60	T(18) > C(12) > A(11) > G(9)	281	281	281	281
LINF_200007800	1558	102771	102758	24.7112	+	102646	125	17	13	LinJ.20:102772-102821	46	30	A(21) > G(14) > C(9) > T(6)	-	-	-	-
LINF_200007900	83	105754	105761	19.2771	+	104505	1249	1358	7	LinJ.20:105755-105804	60	40	G(17) > A(13) > C(13) > T(7)	-	371	-	-
LINF_200008000	372	109024	109023	27.957	+	108800	224	181	1	LinJ.20:109025-109074	58	66	C(18) > T(15) > G(11) > A(6)	-	-	-	-
LINF_200008100	112	111999	112041	23.2143	+	110886	1113	2614	42	LinJ.20:112000-112049	54	56	C(16) > T(12) > A(11) > G(11)	425	425	425	425
LINF_200008200	846	114678	114677	31.0875	+	114325	353	412	1	LinJ.20:114679-114728	48	28	A(20) > G(16) > C(8) > T(6)	-	-	-	326
LINF_200008400	776	119210	119209	23.7113	+	118946	264	255	1	LinJ.20:119211-119260	60	50	C(18) > A(13) > G(12) > T(7)	326	326	326	326
LINF_200008700	564	131428	131442	21.0993	+	131033	395	439	14	LinJ.20:131429-131478	58	40	G(16) > A(14) > C(13) > T(7)	-	-	-	-
LINF_200008800	50	134270	134315	22	+	133474	796	2566	45	LinJ.20:134271-134320	42	76	T(23) > C(15) > A(6) > G(6)	-	337	337	337
LINF_200009200	194	153524	153537	21.134	+	152789	735	1635	13	LinJ.20:153525-153574	64	58	G(17) > C(15) > T(14) > A(4)	267	267	267	267
LINF_200009300	1013	156361	156353	28.1343	+	156013	348	233	8	LinJ.20:156362-156411	46	62	T(18) > C(13) > G(10) > A(9)	-	287	287	287
LINF_200009500	415	165675	165677	38.0723	+	165226	449	407	2	LinJ.20:165676-165725	64	44	G(17) > C(15) > A(11) > T(7)	339	339	339	339
LINF_200009600	843	167745	167648	18.3867	+	167271	474	516	97	LinJ.20:167746-167795	56	46	G(14) > C(14) > A(13) > T(9)	-	-	-	-
LINF_200009700	218	171738	171350	16.055	+	170951	787	463	388	LinJ.20:171739-171788	64	62	C(27) > A(14) > G(5) > T(4)	-	-	-	-
LINF_200009900	100	176087	176080	21	+	175988	99	2184	7	LinJ.20:176088-176137	64	40	G(23) > T(11) > C(9) > A(7)	-	-	-	-
LINF_200010100	607	183251	183227	16.804	+	182866	385	259	24	LinJ.20:183252-183301	56	64	C(18) > T(14) > G(10) > A(8)	-	239	239	239
LINF_200010300	4780	186601	186585	24.2887	+	186372	229	1127	16	LinJ.20:186602-186651	64	42	G(17) > C(15) > A(12) > T(6)	373	373	373	373
LINF_200010500	1146	192592	192594	22.6003	+	192401	191	233	2	LinJ.20:192593-192642	58	42	G(15) > A(14) > C(14) > T(7)	-	-	-	-
LINF_200010800	644	199689	199506	20.1863	+	199305	384	356	183	LinJ.20:199690-199739	54	38	G(18) > A(13) > T(10) > C(9)	367	-	367	367
LINF_200010900	478	202444	202443	19.6653	+	201973	471	521	1	LinJ.20:202445-202494	52	36	A(16) > G(16) > C(10) > T(8)	-	-	-	-
LINF_200011400	807	221706	221705	18.0917	+	221367	339	105	1	LinJ.20:221707-221756	56	50	G(17) > T(14) > C(11) > A(8)	-	-	-	-
LINF_200011500	605	227488	227487	14.7107	+	227351	137	845	1	LinJ.20:227489-227538	52	28	A(21) > G(15) > C(11) > T(3)	-	-	561	-
LINF_200011700	325	238827	238825	32.6154	+	238018	809	3961	2	LinJ.20:238828-238877	66	56	C(19) > G(14) > T(9) > A(8)	-	388	383	388
LINF_200011900	682	244657	244665	8.94428	+	244470	187	708	8	LinJ.20:244658-244707	44	54	A(15) > C(14) > T(13) > G(8)	427	427	427	427
LINF_200012000	853	247099	247085	19.8124	+	246772	327	1146	14	LinJ.20:247100-247149	52	38	A(16) > G(15) > C(11) > T(8)	234	234	234	234
LINF_200012700	654	322526	322533	22.1713	+	322224	302	211	7	LinJ.20:322527-322576	56	48	G(14) > C(14) > A(12) > T(10)	300	-	300	300
LINF_200012800	742	325230	325228	33.4232	+	325171	59	109	2	LinJ.20:325231-325280	56	58	C(19) > A(12) > T(10) > G(9)	-	-	-	-
LINF_200012900	620	327382	326783	32.7419	+	326820	562	2885	599	LinJ.20:327383-327432	58	46	G(15) > C(14) > A(12) > T(9)	345	345	345	345
LINF_200013000	592	332992	332828	15.3716	+	332344	648	535	164	LinJ.20:332993-333042	52	48	G(17) > T(15) > A(9) > C(9)	372	372	372	372
LINF_200013100	705	334632	334630	26.383	+	334514	118	ND	2	LinJ.20:334633-334682	66	66	C(24) > T(9) > G(9) > A(8)	276	-	276	-
LINF_200013200	607	336236	336172	15.1565	+	336189	47	103	64	LinJ.20:336237-336286	46	48	A(14) > T(13) > G(12) > C(11)	287	287	287	287
LINF_200013300	968	337593	337590	20.2479	+	337450	143	71	3	LinJ.20:337594-337643	56	56	C(18) > A(12) > T(10) > G(10)	-	-	-	-
LINF_200013500	477	345631	345577	8.59539	+	345230	401	393	54	LinJ.20:345632-345681	58	36	A(17) > G(15) > C(14) > T(4)	-	-	-	-
LINF_200013700	626	350752	350765	27.1565	+	350211	541	289	13	LinJ.20:350753-350802	62	40	G(19) > C(12) > A(11) > T(8)	371	371	371	371
LINF_200013800	517	352321	352320	31.9149	+	352066	255	708	1	LinJ.20:352322-352371	54	30	G(23) > A(12) > T(11) > C(4)	-	-	339	-
LINF_200013900	369	356598	356590	25.2033	+	356036	562	292	8	LinJ.20:356599-356648	56	32	A(18) > G(16) > C(12) > T(4)	294	294	294	294
LINF_200014000	1576	358308	358018	11.9924	+	357853	455	215	290	LinJ.20:358309-358358	56	32	G(18) > A(16) > C(10) > T(6)	-	-	-	-
LINF_200014100	795	360959	360956	23.0189	+	360647	312	362	3	LinJ.20:360960-361009	50	36	A(18) > G(14) > C(11) > T(7)	-	-	-	-
LINF_200014300	455	370429	370427	14.0659	+	369908	521	561	2	LinJ.20:370430-370479	52	38	G(16) > A(15) > C(10) > T(9)	-	-	515	-
LINF_200014400	463	373919	373906	12.743	+	373304	615	4461	13	LinJ.20:373920-373969	66	72	C(25) > T(11) > G(8) > A(6)	416	416	416	416
LINF_200014800	1011	396536	396533	18.9911	+	396282	254	304	3	LinJ.20:396537-396586	50	40	A(18) > C(13) > G(12) > T(7)	-	-	532	532
LINF_200014900	460	399606	400631	13.0435	+	398872	734	1803	1025	LinJ.20:399607-399656	56	8	G(24) > A(22) > C(4) > T(0)	407	407	407	407
LINF_200015000	450	403793	403742	9.77778	+	403444	349	342	51	LinJ.20:403794-403843	52	58	T(20) > G(17) > C(9) > A(4)	523	523	523	523
LINF_200015100	696	405228	405225	22.8448	+	404732	496	11041	3	LinJ.20:405229-405278	62	58	C(19) > G(12) > T(10) > A(9)	-	-	282	-
LINF_200015900	444	461454	461449	43.2432	+	461262	192	1565	5	LinJ.20:461455-461504	62	72	C(25) > T(11) > A(8) > G(6)	-	-	-	-
LINF_200016600	799	504438	504437	31.9149	+	504107	331	127	1	LinJ.20:504439-504488	58	66	C(17) > T(16) > G(12) > A(5)	6	217	217	217
LINF_200016700	1310	505883	505743	14.4275	+	505623	260	35	140	LinJ.20:505884-505933	52	48	A(15) > C(15) > G(11) > T(9)	-	-	-	-
LINF_200016730	136	508154	508153	30.8824	+	507740	414	5268	1	LinJ.20:508155-508204	56	64	C(17) > T(15) > G(11) > A(7)	-	-	-	-
LINF_200016900	31	532574	532573	16.129	+	530705	1869	1831	1	LinJ.20:532575-532624	56	42	A(15) > G(14) > C(14) > T(7)	-	-	-	-
LINF_200017400	191	553341	553347	20.9424	+	553027	314	1937	6	LinJ.20:553342-553391	34	28	A(29) > C(10) > G(7) > T(4)	-	-	-	-
LINF_200018000	163	578623	578622	14.7239	+	578032	591	2849	1	LinJ.20:578624-578673	60	54	G(15) > C(15) > T(12) > A(8)	-	-	185	-
LINF_200018100	1889	582604	582596	15.2462	+	582221	383	2106	8	LinJ.20:582605-582654	60	54	C(22) > A(15) > G(8) > T(5)	410	410	410	410
LINF_200018200	577	586507	586503	20.7972	+	585328	1179	1291	4	LinJ.20:586508-586557	60	72	C(22) > T(14) > G(8) > A(6)	491	491	491	491
LINF_200018400	1267	593761	593605	7.81373	+	593336	425	1764	156	LinJ.20:593762-593811	52	42	A(17) > C(14) > G(12) > T(7)	-	-	-	-
LINF_200018600	192	602153	602156	11.4583	+	599772	2381	1534	3	LinJ.20:602154-602203	50	38	A(19) > C(13) > G(12) > T(6)	-	-	-	-
LINF_200018700	633	606166	606162	18.0095	+	605631	535	588	4	LinJ.20:606167-606216	58	26	G(23) > A(14) > T(7) > C(6)	574	549	549	549
LINF_200018800	2986	608125	608127	14.5345	+	607994	131	1105	2	LinJ.20:608126-608175	58	30	A(18) > G(17) > C(12) > T(3)	-	-	-	-
LINF_200018900	101	612552	612551	15.8416	+	611435	1117	4110	1	LinJ.20:612553-612602	52	40	A(21) > C(17) > G(9) > T(3)	586	586	586	586
LINF_200019000	93	618665	619519	33.3333	+	618131	534	1297	854	LinJ.20:618666-618715	66	68	C(24) > T(10) > G(9) > A(7)	268	268	268	268
LINF_200019100	405	624518	624532	14.0741	+	624153	365	605	14	LinJ.20:624519-624568	50	48	G(14) > T(13) > A(12) > C(11)	-	515	515	515
LINF_200019300	395	629654	630029	18.9873	+	629004	650	1072	375	LinJ.20:629655-629704	64	64	C(21) > T(11) > G(11) > A(7)	-	-	-	-
LINF_200019700	3609	644155	644153	25.4087	+	643860	295	345	2	LinJ.20:644156-644205	50	42	A(18) > C(14) > G(11) > T(7)	511	-	-	-
LINF_200019900	416	646692	646681	13.2212	-	647590	898	ND	11	LinJ.20:646643-646692	54	50	C(15) > A(13) > G(12) > T(10)	-	-	-	-
LINF_200020100	714	651353	651313	46.6387	-	652036	683	774	40	LinJ.20:651304-651353	58	48	C(17) > A(14) > G(12) > T(7)	358	358	358	358
LINF_200020200	647	652954	652957	19.0108	-	653081	127	174	3	LinJ.20:652905-652954	68	32	G(19) > A(15) > C(15) > T(1)	263	263	263	263
LINF_200020300	460	656638	656447	15	-	657002	364	609	191	LinJ.20:656589-656638	64	50	G(18) > C(14) > T(11) > A(7)	-	-	-	-
LINF_200020400	538	660359	660360	26.2082	-	660519	160	207	1	LinJ.20:660310-660359	58	42	G(15) > A(14) > C(14) > T(7)	-	-	-	301
LINF_200020600	483	671298	671299	27.7433	-	671686	388	794	1	LinJ.20:671249-671298	66	48	C(18) > G(15) > A(11) > T(6)	-	-	-	-
LINF_200020700	482	677023	677017	19.2946	-	677189	166	72	6	LinJ.20:676974-677023	58	58	C(23) > A(15) > T(6) > G(6)	-	-	-	-
LINF_200020750	218	679917	679903	21.5596	-	680312	395	317	14	LinJ.20:679868-679917	52	46	G(15) > A(12) > T(12) > C(11)	223	-	223	223
LINF_200020900	1419	685055	685062	56.4482	-	685552	497	261	7	LinJ.20:685006-685055	66	66	C(22) > T(11) > G(11) > A(6)	-	-	-	-
LINF_200021000	20950	687300	687307	34.7494	-	687607	307	705	7	LinJ.20:687251-687300	62	50	C(20) > A(14) > G(11) > T(5)	578	578	578	578
LINF_200021100	363	688702	688662	20.9366	-	689135	433	102	40	LinJ.20:688653-688702	58	72	C(20) > T(16) > G(9) > A(5)	544	544	544	544
LINF_200021200	946	690910	690906	18.4989	-	691219	309	368	4	LinJ.20:690861-690910	50	32	A(21) > G(13) > C(12) > T(4)	-	-	424	-
LINF_200021300	423	692672	692673	15.3664	-	693041	369	406	1	LinJ.20:692623-692672	58	40	A(15) > G(15) > C(14) > T(6)	304	304	304	304
LINF_200021400	899	697395	697397	23.693	-	698099	704	280	2	LinJ.20:697346-697395	60	70	C(22) > T(13) > G(8) > A(7)	-	-	-	-
LINF_200021500	1203	699490	699491	41.6459	-	699856	366	52	1	LinJ.20:699441-699490	64	70	C(20) > T(15) > G(12) > A(3)	336	342	336	336
LINF_200021800	1345	705569	705568	15.8364	-	705777	208	271	1	LinJ.20:705520-705569	58	32	A(20) > C(15) > G(14) > T(1)	356	403	351	-
LINF_200022200	334	717727	716770	12.5749	-	718212	485	1472	957	LinJ.20:717678-717727	54	58	T(16) > G(14) > C(13) > A(7)	235	235	235	235
LINF_200022300	651	720016	719980	15.5146	-	720111	95	156	36	LinJ.20:719967-720016	52	42	A(16) > G(13) > C(13) > T(8)	-	-	513	526
LINF_200022400	3701	723661	723663	23.7774	-	723719	58	33	2	LinJ.20:723612-723661	54	56	T(14) > C(14) > G(13) > A(9)	-	-	-	-
LINF_210005100	256	7675	7678	24.2188	-	7848	173	1477	3	LinJ.21:7626-7675	66	50	C(20) > G(13) > A(12) > T(5)	305	305	305	305
LINF_210005200	1274	10211	10215	11.7739	+	10171	40	94	4	LinJ.21:10212-10261	42	42	A(18) > T(11) > G(11) > C(10)	436	436	436	436
LINF_210005300	1134	11233	11231	28.0423	+	11035	198	246	2	LinJ.21:11234-11283	38	48	T(20) > G(15) > A(11) > C(4)	262	262	262	262
LINF_210005400	2326	12361	12360	19.6905	+	12285	76	137	1	LinJ.21:12362-12411	42	36	A(19) > G(13) > T(10) > C(8)	269	269	269	269
LINF_210005700	1552	17876	17874	44.3943	+	17618	258	50	2	LinJ.21:17877-17926	58	72	C(21) > T(15) > G(8) > A(6)	243	243	243	243
LINF_210005800	1728	19725	19728	12.5579	+	19690	35	81	3	LinJ.21:19726-19775	40	38	A(16) > G(15) > T(14) > C(5)	330	330	330	330
LINF_210005900	601	21994	21992	43.4276	+	21590	404	138	2	LinJ.21:21995-22044	60	62	C(21) > A(10) > T(10) > G(9)	398	398	398	398
LINF_210006000	1040	23751	23841	11.6346	+	23496	255	305	90	LinJ.21:23752-23801	62	54	C(20) > A(12) > G(11) > T(7)	410	410	410	410
LINF_210006200	899	28767	28758	23.8042	+	28344	423	473	9	LinJ.21:28768-28817	52	36	A(16) > G(16) > C(10) > T(8)	337	337	337	337
LINF_210006400	779	31518	31509	12.0668	+	31222	296	300	9	LinJ.21:31519-31568	62	52	C(22) > A(15) > G(9) > T(4)	-	-	-	-
LINF_210006500	490	37482	37484	23.0612	+	36842	640	788	2	LinJ.21:37483-37532	56	34	A(17) > G(16) > C(12) > T(5)	-	-	-	-
LINF_210006800	1195	53078	53079	21.7573	+	52782	296	347	1	LinJ.21:53079-53128	56	34	G(18) > A(15) > C(10) > T(7)	-	-	-	-
LINF_210007300	899	69680	69693	24.3604	+	69367	313	116	13	LinJ.21:69681-69730	54	64	C(17) > T(15) > G(10) > A(8)	-	307	307	-
LINF_210007500	880	75741	75562	18.4091	+	75424	317	367	179	LinJ.21:75742-75791	62	48	C(17) > G(14) > A(12) > T(7)	203	203	203	203
LINF_210007600	2201	76737	76736	33.6211	+	76533	204	37	1	LinJ.21:76738-76787	60	72	C(23) > T(13) > A(7) > G(7)	334	334	334	334
LINF_210007700	834	79364	79360	17.8657	+	78923	441	414	4	LinJ.21:79365-79414	54	56	C(22) > A(17) > T(6) > G(5)	197	-	197	-
LINF_210007800	235	83205	83204	27.6596	+	81092	2113	2163	1	LinJ.21:83206-83255	46	46	A(19) > C(15) > T(8) > G(8)	397	397	397	397
LINF_210008000	766	89850	89861	16.9713	+	89673	177	231	11	LinJ.21:89851-89900	54	52	C(18) > A(15) > G(9) > T(8)	-	-	-	-
LINF_210008300	763	100502	100533	23.1979	+	100294	208	294	31	LinJ.21:100503-100552	60	44	C(18) > A(16) > G(12) > T(4)	357	357	357	357
LINF_210008400	2391	101980	101979	16.813	+	101672	308	358	1	LinJ.21:101981-102030	56	46	C(15) > A(14) > G(13) > T(8)	183	183	183	183
LINF_210008500	881	103807	103806	29.9659	+	103496	311	351	1	LinJ.21:103808-103857	60	46	C(17) > A(14) > G(13) > T(6)	373	373	373	373
LINF_210008800	190	112437	112446	12.6316	+	111959	478	537	9	LinJ.21:112438-112487	58	36	A(16) > G(16) > C(13) > T(5)	531	531	328	328
LINF_210009000	894	115470	115468	37.1365	+	115249	221	172	2	LinJ.21:115471-115520	60	56	C(19) > A(11) > G(11) > T(9)	227	227	227	227
LINF_210009300	1020	121752	121755	15.098	+	121339	413	1771	3	LinJ.21:121753-121802	54	34	G(17) > A(16) > C(10) > T(7)	-	-	419	419
LINF_210009400	268	127104	127103	19.0299	+	126303	801	1634	1	LinJ.21:127105-127154	70	74	C(24) > T(13) > G(11) > A(2)	543	543	543	543
LINF_210009600	1883	136168	136476	14.445	+	136090	78	136	308	LinJ.21:136169-136218	68	44	G(17) > C(17) > A(11) > T(5)	500	500	500	500
LINF_210009900	2235	142922	142925	20.7159	+	142623	299	350	3	LinJ.21:142923-142972	64	58	C(27) > A(16) > G(5) > T(2)	-	293	267	-
LINF_210010000	508	147258	147257	15.5512	+	146184	1074	800	1	LinJ.21:147259-147308	52	42	G(16) > A(13) > T(11) > C(10)	318	-	318	318
LINF_210010100	651	151222	151202	11.3671	+	150664	558	471	20	LinJ.21:151223-151272	58	62	C(19) > T(12) > G(10) > A(9)	-	-	-	358
LINF_210010300	614	156466	156469	24.5928	+	156157	309	501	3	LinJ.21:156467-156516	54	40	A(17) > C(14) > G(13) > T(6)	695	695	695	695
LINF_210010400	609	159391	159517	28.0788	+	158324	1067	1199	126	LinJ.21:159392-159441	74	36	G(22) > C(15) > A(10) > T(3)	350	350	-	-
LINF_210010500	342	161745	161741	14.9123	+	161502	243	293	4	LinJ.21:161746-161795	64	70	C(26) > A(9) > T(9) > G(6)	353	353	353	353
LINF_210010900	418	165152	165153	33.0144	-	165453	301	ND	1	LinJ.21:165103-165152	64	52	G(21) > T(15) > C(11) > A(3)	-	-	-	-
LINF_210011000	859	169707	169638	17.8114	-	170387	680	939	69	LinJ.21:169658-169707	56	30	A(18) > G(17) > C(11) > T(4)	-	-	-	-
LINF_210011100	247	171926	172135	10.1215	-	173417	1491	944	209	LinJ.21:171877-171926	64	46	C(18) > G(14) > A(13) > T(5)	402	402	402	402
LINF_210011200	1477	175265	175262	38.6594	-	175732	467	520	3	LinJ.21:175216-175265	48	40	G(17) > A(13) > T(13) > C(7)	376	-	376	376
LINF_210011400	523	179429	179427	17.9732	-	179624	195	249	2	LinJ.21:179380-179429	56	52	C(22) > A(18) > G(6) > T(4)	-	-	-	-
LINF_210011600	754	184068	184050	16.4456	-	184531	463	522	18	LinJ.21:184019-184068	40	24	A(26) > G(12) > C(8) > T(4)	-	432	431	431
LINF_210012100	439	199815	199816	21.1845	-	200141	326	457	1	LinJ.21:199766-199815	68	54	G(17) > C(17) > T(10) > A(6)	-	-	-	347
LINF_210012200	293	202509	202511	28.6689	-	203548	1039	1089	2	LinJ.21:202460-202509	60	48	G(15) > C(15) > A(11) > T(9)	-	287	-	287
LINF_210012400	809	207815	207817	30.7787	-	207982	167	452	2	LinJ.21:207766-207815	54	36	A(17) > G(15) > C(12) > T(6)	-	-	325	-
LINF_210012700	377	216938	216931	16.7109	-	217711	773	823	7	LinJ.21:216889-216938	48	28	A(21) > G(15) > C(9) > T(5)	-	-	-	-
LINF_210012800	1627	221700	221162	9.83405	-	221786	86	1808	538	LinJ.21:221651-221700	44	54	T(15) > A(13) > C(12) > G(10)	214	214	210	214
LINF_210012900	2527	231361	231363	10.6055	+	231238	123	157	2	LinJ.21:231362-231411	44	40	A(17) > G(13) > T(11) > C(9)	285	285	287	285
LINF_210013000	25025	232045	232042	15.3167	+	231978	67	117	3	LinJ.21:232046-232095	28	32	A(29) > C(9) > T(7) > G(5)	205	205	205	205
LINF_210013200	5830	233398	233402	15.3859	+	233255	143	202	4	LinJ.21:233399-233448	30	32	A(26) > T(9) > G(8) > C(7)	374	374	374	374
LINF_210013300	1171	236207	236204	19.8975	+	235962	245	679	3	LinJ.21:236208-236257	48	36	A(16) > G(16) > T(10) > C(8)	367	364	364	364
LINF_210013400	975	238968	238969	23.0769	+	238516	452	1895	1	LinJ.21:238969-239018	48	26	A(22) > G(15) > C(9) > T(4)	585	585	585	585
LINF_210013600	266	250885	250884	21.0526	+	249873	1012	1378	1	LinJ.21:250886-250935	54	56	C(15) > T(13) > G(12) > A(10)	272	272	272	272
LINF_210013800	115	264045	264052	26.9565	+	263306	739	796	7	LinJ.21:264046-264095	52	44	A(17) > C(15) > G(11) > T(7)	-	356	356	-
LINF_210014000	657	269707	269830	13.5464	+	269264	443	718	123	LinJ.21:269708-269757	60	48	C(16) > G(14) > A(12) > T(8)	-	-	-	-
LINF_210014200	160	284267	284268	18.125	+	283304	963	2925	1	LinJ.21:284268-284317	54	42	G(15) > A(14) > C(12) > T(9)	501	501	501	501
LINF_210014400	1206	299758	299782	12.5207	+	299357	401	323	24	LinJ.21:299759-299808	60	78	C(24) > T(15) > G(6) > A(5)	465	465	465	465
LINF_210014600	972	304499	304498	24.177	+	304306	193	1693	1	LinJ.21:304500-304549	52	42	A(16) > G(13) > C(13) > T(8)	381	381	381	381
LINF_210014800	1279	312582	312584	19.0774	+	312084	498	552	2	LinJ.21:312583-312632	54	44	A(19) > C(18) > G(9) > T(4)	321	321	321	321
LINF_210015000	2334	316861	316881	16.7095	+	316497	364	1591	20	LinJ.21:316862-316911	46	74	T(22) > C(15) > G(8) > A(5)	478	478	478	478
LINF_210015100	384	326051	326282	14.5833	+	325937	114	164	231	LinJ.21:326052-326101	50	54	T(16) > G(14) > C(11) > A(9)	525	525	525	525
LINF_210015200	1231	328009	327736	18.5215	+	327602	407	568	273	LinJ.21:328010-328059	58	50	G(18) > T(14) > C(11) > A(7)	-	-	-	-
LINF_210015300	320	337202	337203	39.0625	+	336992	210	582	1	LinJ.21:337203-337252	56	62	T(18) > G(15) > C(13) > A(4)	-	316	316	316
LINF_210015400	952	339865	339863	16.8067	+	339715	150	5157	2	LinJ.21:339866-339915	52	36	A(18) > G(14) > C(12) > T(6)	273	387	273	387
LINF_210015600	489	354092	353740	10.0204	+	353278	814	442	352	LinJ.21:354093-354142	68	50	G(21) > C(13) > T(12) > A(4)	-	-	-	-
LINF_210015700	344	359054	359065	11.6279	+	358312	742	803	11	LinJ.21:359055-359104	54	52	C(18) > A(15) > G(9) > T(8)	-	-	386	-
LINF_210016000	1019	365873	365868	33.6605	+	365338	535	567	5	LinJ.21:365874-365923	62	70	C(24) > T(11) > A(8) > G(7)	-	-	-	-
LINF_210016100	61	371517	371516	26.2295	+	371161	356	35	1	LinJ.21:371518-371567	66	66	C(21) > T(12) > G(12) > A(5)	-	-	-	-
LINF_210016300	766	378392	378387	25.3264	+	378084	308	353	5	LinJ.21:378393-378442	54	42	A(19) > C(17) > G(10) > T(4)	551	551	551	551
LINF_210016400	512	380449	380448	29.2969	+	380300	149	20	1	LinJ.21:380450-380499	58	68	C(19) > T(15) > G(10) > A(6)	335	335	335	335
LINF_210016500	1256	382275	382274	20.0637	+	382115	160	216	1	LinJ.21:382276-382325	48	38	A(17) > G(14) > C(10) > T(9)	302	302	302	302
LINF_210016600	1116	383774	383810	11.3799	+	383545	229	312	36	LinJ.21:383775-383824	54	56	C(15) > T(13) > G(12) > A(10)	441	444	451	451
LINF_210016700	18789	384895	384893	30.6988	+	384686	209	123	2	LinJ.21:384896-384945	60	68	C(20) > T(14) > G(10) > A(6)	302	302	302	302
LINF_210016800	28174	385923	385921	31.3445	+	385714	209	123	2	LinJ.21:385924-385973	60	68	C(20) > T(14) > G(10) > A(6)	302	302	302	302
LINF_210017200	291	399857	399854	16.8385	+	399205	652	309	3	LinJ.21:399858-399907	66	56	G(17) > C(16) > T(12) > A(5)	-	222	20	20
LINF_210017300	862	402483	402472	29.2343	+	402271	212	55	11	LinJ.21:402484-402533	64	54	C(19) > G(13) > A(10) > T(8)	-	-	-	-
LINF_210017500	1343	410802	410811	18.3172	+	410476	326	385	9	LinJ.21:410803-410852	46	32	A(21) > G(13) > C(10) > T(6)	-	-	-	-
LINF_210017700	1095	420463	420465	20.9132	+	420289	174	226	2	LinJ.21:420464-420513	46	36	A(19) > G(13) > C(10) > T(8)	339	339	339	-
LINF_210017800	740	422407	422393	25	+	421882	525	1075	14	LinJ.21:422408-422457	56	54	G(14) > C(14) > T(13) > A(9)	-	-	-	-
LINF_210018200	29250	439762	439768	26.1231	+	439447	315	365	6	LinJ.21:439763-439812	58	46	C(17) > A(15) > G(12) > T(6)	423	423	423	423
LINF_210018300	33815	441067	441066	46.6184	+	440770	297	2243	1	LinJ.21:441068-441117	62	52	C(22) > A(15) > G(9) > T(4)	-	-	362	362
LINF_210019000	802	449510	449506	10.7232	-	449554	44	ND	4	LinJ.21:449461-449510	34	40	A(23) > T(10) > C(10) > G(7)	-	-	-	-
LINF_210019100	232	452173	452176	18.9655	-	452970	797	852	3	LinJ.21:452124-452173	48	38	A(18) > G(13) > C(11) > T(8)	-	-	475	475
LINF_210019400	671	464015	464016	15.6483	-	464186	171	148	1	LinJ.21:463966-464015	70	36	G(22) > C(13) > A(10) > T(5)	343	347	-	343
LINF_210019600	106	478399	478401	24.5283	-	478627	228	7062	2	LinJ.21:478350-478399	30	54	T(21) > A(14) > G(9) > C(6)	-	-	-	-
LINF_210019900	869	488399	488386	21.1738	-	489032	633	683	13	LinJ.21:488350-488399	54	62	C(18) > T(13) > A(10) > G(9)	-	-	-	-
LINF_210020300	418	498854	498857	16.9856	-	499365	511	561	3	LinJ.21:498805-498854	62	44	C(19) > A(16) > G(12) > T(3)	-	-	-	-
LINF_210020400	46	504756	504753	17.3913	-	507208	2452	2824	3	LinJ.21:504707-504756	48	46	A(14) > G(13) > T(12) > C(11)	-	-	-	-
LINF_210021000	381	532611	532430	16.0105	-	533485	874	1105	181	LinJ.21:532562-532611	70	86	C(28) > T(15) > G(7) > A(0)	-	-	549	549
LINF_210021100	337	534944	534509	24.0356	-	535304	360	410	435	LinJ.21:534895-534944	62	62	C(20) > T(11) > G(11) > A(8)	-	-	425	578
LINF_210021200	639	538036	538037	30.3599	-	538214	178	1685	1	LinJ.21:537987-538036	62	32	G(21) > A(13) > C(10) > T(6)	149	149	149	149
LINF_210021300	2255	541191	541197	23.2373	-	541298	107	304	6	LinJ.21:541142-541191	58	64	C(20) > T(12) > A(9) > G(9)	-	-	648	648
LINF_210021400	1516	542690	542689	16.2929	-	542994	304	360	1	LinJ.21:542641-542690	48	54	C(16) > A(15) > T(11) > G(8)	313	313	105	313
LINF_210021500	320	544281	544283	28.125	-	544978	697	756	2	LinJ.21:544232-544281	60	32	G(19) > A(15) > C(11) > T(5)	614	614	614	614
LINF_210021600	384	552307	552295	11.7188	-	553098	791	2343	12	LinJ.21:552258-552307	24	54	A(21) > T(17) > C(10) > G(2)	347	347	347	347
LINF_210021900	355	563822	563824	19.7183	-	564179	357	417	2	LinJ.21:563773-563822	44	38	A(25) > C(16) > G(6) > T(3)	338	338	338	338
LINF_210022100	3140	569349	569352	20.7006	-	569554	205	649	3	LinJ.21:569300-569349	58	40	A(17) > C(16) > G(13) > T(4)	-	286	-	-
LINF_210022200	542	570317	570334	12.1771	-	570976	659	675	17	LinJ.21:570268-570317	62	50	G(18) > C(13) > T(12) > A(7)	370	370	369	369
LINF_210022300	487	572546	572548	35.9343	-	572749	203	276	2	LinJ.21:572497-572546	66	50	C(21) > A(13) > G(12) > T(4)	424	424	424	424
LINF_210022400	257	572546	572548	33.463	-	573631	1085	264	2	LinJ.21:572497-572546	66	50	C(21) > A(13) > G(12) > T(4)	424	424	424	424
LINF_210022500	480	575993	575983	27.2917	-	576045	52	118	10	LinJ.21:575944-575993	58	32	A(17) > G(17) > C(12) > T(4)	-	-	432	432
LINF_210022600	297	575993	575983	26.5993	-	576596	603	ND	10	LinJ.21:575944-575993	58	32	A(17) > G(17) > C(12) > T(4)	-	-	432	432
LINF_210023000	979	583976	583978	15.8325	-	584528	552	1559	2	LinJ.21:583927-583976	50	30	A(19) > G(16) > C(9) > T(6)	-	-	-	-
LINF_210023200	1099	590702	590703	15.0136	-	590889	187	17	1	LinJ.21:590653-590702	64	34	G(18) > A(15) > C(14) > T(3)	-	-	-	-
LINF_210023300	1047	593819	593824	18.9112	-	594324	505	1115	5	LinJ.21:593770-593819	54	50	C(14) > G(13) > A(12) > T(11)	-	-	647	647
LINF_210023700	473	607312	607297	16.0677	-	607611	299	237	15	LinJ.21:607263-607312	56	40	G(17) > A(13) > C(11) > T(9)	383	383	383	383
LINF_210023900	1236	616634	616636	13.5922	-	616878	244	3902	2	LinJ.21:616585-616634	52	60	C(17) > T(13) > A(11) > G(9)	317	317	317	317
LINF_210024100	19944	629399	629405	18.8979	-	629855	456	506	6	LinJ.21:629350-629399	64	50	C(17) > G(15) > A(10) > T(8)	-	-	-	-
LINF_210024250	1621	634390	634391	12.955	-	635031	641	602	1	LinJ.21:634341-634390	74	70	C(27) > G(10) > T(8) > A(5)	-	-	-	426
LINF_210024300	547	636443	636452	18.2815	-	637245	802	1402	9	LinJ.21:636394-636443	48	36	G(18) > A(14) > T(12) > C(6)	925	1005	925	925
LINF_210024400	629	639192	639195	30.6836	-	640206	1014	1056	3	LinJ.21:639143-639192	70	50	C(19) > G(16) > A(9) > T(6)	491	491	491	491
LINF_210024500	1504	642991	643007	8.37766	-	643304	313	1345	16	LinJ.21:642942-642991	44	16	A(27) > G(15) > C(7) > T(1)	508	512	508	508
LINF_210024700	195	657137	657138	38.9744	-	657397	260	2811	1	LinJ.21:657088-657137	42	60	T(19) > C(11) > A(10) > G(10)	1159	1159	-	-
LINF_210024900	903	664887	664885	16.5006	-	665540	653	715	2	LinJ.21:664838-664887	48	30	A(21) > G(14) > C(10) > T(5)	-	-	-	-
LINF_210025100	2196	668944	668943	12.8415	-	669132	188	239	1	LinJ.21:668895-668944	58	40	A(15) > G(15) > C(14) > T(6)	267	267	267	267
LINF_210025200	362	670760	670770	20.7182	-	671133	373	403	10	LinJ.21:670711-670760	60	70	C(19) > T(16) > G(11) > A(4)	368	368	368	368
LINF_210025300	244	676111	676113	13.5246	-	676814	703	2264	2	LinJ.21:676062-676111	58	72	C(24) > T(12) > A(9) > G(5)	-	-	347	347
LINF_210025500	303	686908	686910	13.8614	-	687536	628	671	2	LinJ.21:686859-686908	40	44	A(16) > T(14) > G(12) > C(8)	503	505	503	-
LINF_210026100	3147	701276	701284	25.135	-	701526	250	116	8	LinJ.21:701227-701276	60	52	G(15) > C(15) > T(11) > A(9)	336	336	336	336
LINF_210026400	1189	708713	708709	22.7082	-	708992	279	333	4	LinJ.21:708664-708713	58	38	G(17) > A(14) > C(12) > T(7)	468	468	468	468
LINF_210026500	2612	710796	710740	22.2435	-	711075	279	215	56	LinJ.21:710747-710796	60	52	G(17) > T(13) > C(13) > A(7)	411	411	411	411
LINF_210027200	1823	726103	726224	18.0472	+	725948	155	326	121	LinJ.21:726104-726153	46	30	G(18) > A(17) > T(10) > C(5)	360	360	355	355
LINF_210027300	1601	727958	727929	8.24485	+	727688	270	609	29	LinJ.21:727959-728008	56	60	C(16) > T(14) > G(12) > A(8)	748	748	748	748
LINF_210027500	1527	732682	732669	23.2482	+	732370	312	364	13	LinJ.21:732683-732732	58	44	C(15) > A(14) > G(14) > T(7)	594	594	594	594
LINF_210027600	18842	734136	734137	17.9758	+	734039	97	148	1	LinJ.21:734137-734186	56	34	A(19) > G(14) > C(14) > T(3)	678	678	318	318
LINF_210027700	862	736545	736409	16.0093	+	735513	1032	977	136	LinJ.21:736546-736595	50	46	A(17) > C(15) > G(10) > T(8)	374	374	374	374
LINF_210028000	20592	741411	741405	18.041	+	741321	90	140	6	LinJ.21:741412-741461	50	44	A(16) > C(13) > G(12) > T(9)	481	481	481	484
LINF_210028200	508	745969	745943	12.5984	+	745666	303	1030	26	LinJ.21:745970-746019	64	44	G(16) > C(16) > A(12) > T(6)	-	-	-	-
LINF_210028500	8179	756804	756817	23.9149	+	755616	1188	1238	13	LinJ.21:756805-756854	52	34	A(20) > G(13) > C(13) > T(4)	-	-	438	-
LINF_210028700	553	762606	762553	18.9873	+	761576	1030	ND	53	LinJ.21:762607-762656	60	72	C(22) > T(14) > G(8) > A(6)	-	-	-	-
LINF_220005300	37933	11306	11314	27.0477	-	11432	126	181	8	LinJ.22:11257-11306	58	42	A(17) > C(17) > G(12) > T(4)	295	295	295	295
LINF_220005400	1119	12958	12962	12.7793	-	13162	204	270	4	LinJ.22:12909-12958	48	40	A(18) > G(12) > C(12) > T(8)	297	297	3	297
LINF_220005500	555	14388	14476	7.74775	-	14629	241	291	88	LinJ.22:14339-14388	58	48	G(15) > C(14) > A(11) > T(10)	357	357	357	357
LINF_220005700	2598	20520	20512	22.5173	-	20787	267	185	8	LinJ.22:20471-20520	48	68	C(19) > T(15) > A(11) > G(5)	-	-	270	-
LINF_220005900	527	25379	25392	14.9905	-	25557	178	214	13	LinJ.22:25330-25379	56	42	G(16) > A(13) > C(12) > T(9)	383	383	383	383
LINF_220006200	1753	48348	48346	21.0496	-	48529	181	233	2	LinJ.22:48299-48348	50	52	C(15) > A(14) > T(11) > G(10)	315	315	315	315
LINF_220006400	436	52110	52111	24.5413	-	52819	709	1243	1	LinJ.22:52061-52110	44	34	A(21) > G(12) > C(10) > T(7)	394	394	394	394
LINF_220006500	810	55210	55217	34.1975	-	55323	113	602	7	LinJ.22:55161-55210	66	56	C(18) > G(15) > T(10) > A(7)	-	-	-	295
LINF_220007000	284	78192	78194	28.8732	-	78889	697	747	2	LinJ.22:78143-78192	58	38	G(16) > A(15) > C(13) > T(6)	-	-	-	-
LINF_220007100	172	83981	83977	33.1395	-	84889	908	312	4	LinJ.22:83932-83981	54	54	C(16) > A(12) > T(11) > G(11)	-	-	-	-
LINF_220007600	2152	106103	106014	15.7528	-	106765	662	687	89	LinJ.22:106054-106103	54	52	C(16) > A(13) > G(11) > T(10)	468	468	468	467
LINF_220007700	473	107630	108547	9.51374	-	109198	1568	1618	917	LinJ.22:107581-107630	56	48	C(18) > A(16) > G(10) > T(6)	590	590	532	590
LINF_220008200	655	123675	123674	31.7557	-	124310	635	686	1	LinJ.22:123626-123675	62	50	C(21) > A(15) > G(10) > T(4)	-	-	-	-
LINF_220008700	2269	142376	142378	17.5408	-	142474	98	106	2	LinJ.22:142327-142376	58	40	A(15) > G(15) > C(14) > T(6)	363	363	278	278
LINF_220008800	1221	143860	143850	28.9107	-	144114	254	304	10	LinJ.22:143811-143860	60	48	C(17) > A(13) > G(13) > T(7)	383	383	383	383
LINF_220008900	561	148294	148290	10.3387	-	149000	706	749	4	LinJ.22:148245-148294	42	34	A(22) > G(11) > C(10) > T(7)	-	-	250	250
LINF_220009000	438	151310	151315	18.4932	-	151942	632	1163	5	LinJ.22:151261-151310	66	36	G(18) > C(15) > A(14) > T(3)	934	-	294	934
LINF_220010100	45171	220176	220169	21.6776	-	220384	208	258	7	LinJ.22:220127-220176	56	42	A(18) > C(17) > G(11) > T(4)	-	-	450	450
LINF_220010300	833	224299	224301	26.8908	-	224670	371	429	2	LinJ.22:224250-224299	60	30	G(18) > A(17) > C(12) > T(3)	-	-	-	-
LINF_220010600	933	236137	236125	24.4373	-	236268	131	207	12	LinJ.22:236088-236137	60	68	C(25) > A(11) > T(9) > G(5)	-	-	-	-
LINF_220010800	1954	243710	243708	27.6868	-	243817	107	674	2	LinJ.22:243661-243710	36	46	T(17) > A(15) > G(12) > C(6)	-	-	-	-
LINF_220010900	542	245317	245593	10.5166	-	245734	417	17	276	LinJ.22:245268-245317	54	28	G(19) > A(17) > C(8) > T(6)	143	143	143	143
LINF_220011200	336	255994	255996	16.369	-	257556	1562	1612	2	LinJ.22:255945-255994	56	50	C(15) > G(13) > A(12) > T(10)	410	410	410	410
LINF_220011600	164	266823	266827	28.0488	-	268121	1298	1780	4	LinJ.22:266774-266823	50	62	T(17) > C(14) > G(11) > A(8)	-	-	454	454
LINF_220011700	86	270449	270455	40.6977	-	271564	1115	1165	6	LinJ.22:270400-270449	54	68	T(18) > C(16) > G(11) > A(5)	-	-	-	-
LINF_220011900	376	286246	286262	21.5426	-	287404	1158	1012	16	LinJ.22:286197-286246	60	64	T(17) > G(15) > C(15) > A(3)	-	-	-	-
LINF_220012000	80	289713	289715	26.25	-	290476	763	813	2	LinJ.22:289664-289713	56	16	G(24) > A(18) > T(4) > C(4)	-	-	-	-
LINF_220012200	1540	297581	297577	20.3247	-	297998	417	440	4	LinJ.22:297532-297581	48	50	A(13) > T(13) > G(12) > C(12)	316	317	317	317
LINF_220012300	459	298754	298752	43.7908	-	299991	1237	1294	2	LinJ.22:298705-298754	46	36	A(16) > G(16) > T(11) > C(7)	334	334	334	334
LINF_220012700	839	315887	315886	24.0763	-	316270	383	434	1	LinJ.22:315838-315887	64	52	C(19) > G(13) > A(11) > T(7)	-	-	-	-
LINF_220012900	317	323445	323444	22.7129	-	323602	157	208	1	LinJ.22:323396-323445	62	52	C(19) > A(12) > G(12) > T(7)	-	-	-	-
LINF_220013000	656	329703	329699	17.5305	-	329990	287	3762	4	LinJ.22:329654-329703	56	44	A(14) > G(14) > C(14) > T(8)	-	-	-	-
LINF_220013100	316	331408	331404	22.7848	-	331617	209	266	4	LinJ.22:331359-331408	64	32	A(17) > G(17) > C(15) > T(1)	405	405	405	405
LINF_220013200	472	335655	335641	15.4661	-	337225	1570	1319	14	LinJ.22:335606-335655	62	46	G(19) > C(12) > T(11) > A(8)	-	-	448	-
LINF_220013600	351	368035	368036	17.6638	-	369356	1321	1380	1	LinJ.22:367986-368035	50	30	A(18) > G(17) > C(8) > T(7)	419	419	419	419
LINF_220013700	681	370836	371116	18.5022	-	371818	982	753	280	LinJ.22:370787-370836	56	68	C(18) > T(16) > G(10) > A(6)	-	211	211	211
LINF_220013800	1155	373171	373256	19.3074	-	373472	301	186	85	LinJ.22:373122-373171	44	42	A(16) > G(13) > T(12) > C(9)	272	272	272	272
LINF_220013900	485	378489	378487	33.8144	+	378243	246	174	2	LinJ.22:378490-378539	46	50	T(15) > G(13) > A(12) > C(10)	320	320	320	320
LINF_220014000	1416	380219	380221	10.8757	+	380097	122	2221	2	LinJ.22:380220-380269	52	50	C(14) > A(13) > G(12) > T(11)	220	220	220	220
LINF_220014100	186	386665	386660	20.4301	+	386457	208	265	5	LinJ.22:386666-386715	64	32	A(17) > G(17) > C(15) > T(1)	405	405	405	405
LINF_220014200	1571	388368	388359	19.669	+	388084	284	1043	9	LinJ.22:388369-388418	56	44	A(14) > G(14) > C(14) > T(8)	-	-	-	-
LINF_220014300	256	394626	394627	17.1875	+	394470	156	207	1	LinJ.22:394627-394676	62	52	C(19) > A(12) > G(12) > T(7)	-	-	-	-
LINF_220014500	595	403073	403053	31.2605	+	402352	721	777	20	LinJ.22:403074-403123	56	48	C(16) > A(14) > G(12) > T(8)	-	-	-	-
LINF_220014700	2219	411519	411520	17.8008	+	410959	560	610	1	LinJ.22:411520-411569	70	54	C(22) > G(13) > A(10) > T(5)	-	-	419	-
LINF_220014800	658	414755	414763	20.0608	+	414396	359	340	8	LinJ.22:414756-414805	52	48	A(14) > C(14) > G(12) > T(10)	335	335	335	335
LINF_220015100	1240	425019	424996	8.06452	+	424885	134	2020	23	LinJ.22:425020-425069	54	46	G(14) > A(13) > C(13) > T(10)	707	341	341	707
LINF_220015600	111	451309	451317	12.6126	+	450803	506	2070	8	LinJ.22:451310-451359	56	66	T(18) > C(15) > G(13) > A(4)	525	525	461	461
LINF_220015700	440	459487	459489	27.2727	+	459333	154	2306	2	LinJ.22:459488-459537	44	24	A(25) > G(13) > C(9) > T(3)	426	426	426	426
LINF_220015800	596	464885	464884	38.255	+	464386	499	549	1	LinJ.22:464886-464935	56	44	A(14) > G(14) > C(14) > T(8)	-	-	-	-
LINF_220015900	529	469733	469732	27.5992	+	469131	602	652	1	LinJ.22:469734-469783	62	50	C(18) > G(13) > A(12) > T(7)	-	-	-	-
LINF_220016000	331	473057	473023	11.1782	+	472271	786	1654	34	LinJ.22:473058-473107	66	62	C(22) > G(11) > T(9) > A(8)	-	-	724	724
LINF_220016400	374	488718	488396	15.508	+	487900	818	766	322	LinJ.22:488719-488768	70	64	C(21) > G(14) > T(11) > A(4)	-	-	-	-
LINF_220016600	933	494959	494957	17.3633	+	494272	687	688	2	LinJ.22:494960-495009	40	44	A(16) > T(14) > G(12) > C(8)	-	-	433	-
LINF_220016800	1692	499950	499949	37.8251	+	499706	244	307	1	LinJ.22:499951-500000	56	42	G(18) > A(11) > T(11) > C(10)	-	-	622	-
LINF_220017400	981	538641	538640	22.3242	+	538066	575	1189	1	LinJ.22:538642-538691	60	80	C(23) > T(17) > G(7) > A(3)	-	-	-	-
LINF_220017500	487	544133	544135	16.4271	+	543527	606	661	2	LinJ.22:544134-544183	52	38	A(18) > G(13) > C(13) > T(6)	298	298	298	298
LINF_220017600	1405	546056	546045	26.6192	+	545844	212	88	11	LinJ.22:546057-546106	58	48	C(17) > A(14) > G(12) > T(7)	-	-	-	-
LINF_220017700	120	550172	550169	25.8333	+	549515	657	707	3	LinJ.22:550173-550222	58	42	G(15) > A(14) > C(14) > T(7)	398	398	398	398
LINF_220017800	674	552558	552557	16.3205	+	552232	326	83	1	LinJ.22:552559-552608	46	54	T(15) > A(12) > C(12) > G(11)	259	263	263	259
LINF_220017900	885	554082	554098	18.0791	+	553561	521	492	16	LinJ.22:554083-554132	60	60	C(23) > A(13) > T(7) > G(7)	195	195	195	195
LINF_220018300	839	564232	564244	21.4541	+	564051	181	800	12	LinJ.22:564233-564282	48	44	A(19) > C(15) > G(9) > T(7)	-	-	-	-
LINF_220018400	399	564801	564803	51.3784	-	564956	155	ND	2	LinJ.22:564752-564801	60	22	G(24) > A(15) > C(6) > T(5)	-	-	-	-
LINF_220018700	224	575626	575634	20.5357	-	576097	471	521	8	LinJ.22:575577-575626	58	18	G(22) > A(19) > C(7) > T(2)	-	-	-	-
LINF_220019000	365	586717	586718	16.4384	-	587013	296	1709	1	LinJ.22:586668-586717	52	52	T(15) > G(15) > C(11) > A(9)	263	263	263	263
LINF_220019200	326	595539	595579	15.0307	-	596575	1036	5158	40	LinJ.22:595490-595539	54	72	T(18) > C(18) > G(9) > A(5)	-	-	-	-
LINF_220019300	163	600829	601086	22.0859	-	601185	356	101	257	LinJ.22:600780-600829	54	42	G(18) > T(12) > A(11) > C(9)	-	-	-	-
LINF_220019500	504	620335	620336	16.0714	-	620600	265	1753	1	LinJ.22:620286-620335	56	62	C(20) > A(11) > T(11) > G(8)	949	576	949	949
LINF_220019600	188	623576	623578	20.7447	-	624228	652	917	2	LinJ.22:623527-623576	46	26	A(21) > G(16) > C(7) > T(6)	-	-	576	576
LINF_220019700	1433	628027	628030	32.3098	-	628629	602	2668	3	LinJ.22:627978-628027	66	68	C(21) > T(13) > G(12) > A(4)	431	431	426	431
LINF_220019800	469	630387	630738	20.0426	-	631051	664	714	351	LinJ.22:630338-630387	62	66	C(20) > T(13) > G(11) > A(6)	501	501	497	501
LINF_220019900	282	633788	633786	13.1206	-	634768	980	1438	2	LinJ.22:633739-633788	46	42	A(18) > C(12) > G(11) > T(9)	156	156	156	156
LINF_220020100	850	638331	638067	12.7059	-	638513	182	532	264	LinJ.22:638282-638331	46	66	T(19) > C(14) > G(9) > A(8)	681	681	681	681
LINF_220020200	1032	640997	640992	21.7054	-	641770	773	828	5	LinJ.22:640948-640997	60	36	A(17) > G(15) > C(15) > T(3)	-	441	475	441
LINF_220020400	2882	647245	647253	17.592	-	647487	242	289	8	LinJ.22:647196-647245	58	42	G(16) > A(13) > C(13) > T(8)	307	-	307	307
LINF_220020600	1944	654756	654757	31.6358	-	654864	108	158	1	LinJ.22:654707-654756	44	50	A(14) > T(14) > G(11) > C(11)	-	-	-	-
LINF_220020700	1943	656052	656057	29.0273	-	657328	1276	1250	5	LinJ.22:656003-656052	58	42	G(16) > A(13) > C(13) > T(8)	365	365	365	365
LINF_220020800	1640	658338	658340	27.9878	-	658390	52	102	2	LinJ.22:658289-658338	48	50	A(15) > C(14) > T(11) > G(10)	268	268	268	268
LINF_220020900	1080	659992	660081	12.4074	-	660086	94	13	89	LinJ.22:659943-659992	48	52	T(14) > A(12) > G(12) > C(12)	247	247	247	247
LINF_220021200	417	672848	672851	35.2518	+	672449	399	449	3	LinJ.22:672849-672898	48	36	A(18) > G(14) > C(10) > T(8)	-	-	393	393
LINF_220021300	246	676098	676121	19.5122	+	674838	1260	1296	23	LinJ.22:676099-676148	34	38	A(22) > T(11) > G(9) > C(8)	326	327	327	327
LINF_220021700	571	685926	685927	40.8056	+	685831	95	17	1	LinJ.22:685927-685976	50	68	C(19) > T(15) > A(10) > G(6)	300	299	300	300
LINF_220021800	25746	686807	686880	10.7395	+	686773	34	2503	73	LinJ.22:686808-686857	42	32	A(22) > G(12) > C(9) > T(7)	-	-	-	-
LINF_220022000	2086	697762	697759	19.7987	+	697436	326	359	3	LinJ.22:697763-697812	54	72	T(19) > C(17) > G(10) > A(4)	-	425	390	390
LINF_220022100	699	699552	699562	18.7411	+	699337	215	256	10	LinJ.22:699553-699602	54	44	A(15) > C(14) > G(13) > T(8)	-	-	-	-
LINF_220022400	196	717783	717785	28.0612	+	716788	995	1041	2	LinJ.22:717784-717833	44	44	A(19) > C(13) > T(9) > G(9)	-	-	-	-
LINF_220022600	284	730613	730624	21.831	+	729825	788	838	11	LinJ.22:730614-730663	48	40	A(16) > G(14) > T(10) > C(10)	358	358	358	358
LINF_220022700	11118	731828	731832	17.1973	+	731387	441	824	4	LinJ.22:731829-731878	44	36	A(21) > G(11) > C(11) > T(7)	583	583	583	583
LINF_220022800	990	733911	733384	9.49495	+	733663	248	300	527	LinJ.22:733912-733961	60	64	C(20) > T(12) > G(10) > A(8)	-	-	-	-
LINF_220023000	603	742187	742201	17.0813	+	741877	310	212	14	LinJ.22:742188-742237	48	70	T(21) > C(14) > G(10) > A(5)	178	178	178	178
LINF_230005000	774	4103	5015	10.2067	+	4064	39	1004	912	LinJ.23:4104-4153	36	48	A(16) > T(16) > G(10) > C(8)	235	235	235	235
LINF_230005100	660	7209	7208	29.0909	+	6976	233	283	1	LinJ.23:7210-7259	48	32	A(17) > G(17) > T(9) > C(7)	397	397	397	397
LINF_230005200	2028	8536	8540	21.5483	+	8504	32	72	4	LinJ.23:8537-8586	36	60	T(20) > A(12) > C(10) > G(8)	285	285	285	285
LINF_230005300	1246	10555	10451	13.2424	+	10300	255	240	104	LinJ.23:10556-10605	54	48	G(16) > T(13) > C(11) > A(10)	390	390	390	390
LINF_230005400	8333	12167	12171	26.149	+	11765	402	136	4	LinJ.23:12168-12217	48	32	A(19) > G(15) > C(9) > T(7)	323	323	323	323
LINF_230005500	1564	13588	13585	30.7545	+	13467	121	171	3	LinJ.23:13589-13638	52	42	A(15) > G(14) > C(12) > T(9)	402	402	402	402
LINF_230005800	188	19034	19032	29.2553	+	17899	1135	530	2	LinJ.23:19035-19084	56	74	C(19) > T(18) > G(9) > A(4)	-	335	335	-
LINF_230006100	159	25058	25056	15.7233	+	24613	445	2644	2	LinJ.23:25059-25108	46	66	C(19) > T(14) > A(13) > G(4)	243	243	243	243
LINF_230006200	424	37182	37161	15.0943	+	36925	257	2516	21	LinJ.23:37183-37232	60	38	A(16) > G(15) > C(15) > T(4)	-	-	-	-
LINF_230006300	1965	40837	40842	17.659	+	40675	162	198	5	LinJ.23:40838-40887	58	38	A(16) > G(15) > C(14) > T(5)	397	397	397	397
LINF_230006500	106	45412	45425	11.3208	+	45064	348	2765	13	LinJ.23:45413-45462	60	50	C(21) > A(16) > G(9) > T(4)	-	-	336	336
LINF_230006600	938	49680	49533	23.0277	+	49477	203	139	147	LinJ.23:49681-49730	56	78	T(20) > C(19) > G(9) > A(2)	292	292	-	292
LINF_230006700	756	52052	52056	10.0529	+	51772	280	325	4	LinJ.23:52053-52102	40	42	A(18) > T(12) > G(11) > C(9)	404	404	404	404
LINF_230007100	3292	61234	61232	23.1166	+	60314	920	2665	2	LinJ.23:61235-61284	52	30	A(20) > G(15) > C(11) > T(4)	329	329	329	329
LINF_230007200	232	69264	69261	14.2241	+	68431	833	2977	3	LinJ.23:69265-69314	60	60	C(16) > T(14) > G(14) > A(6)	301	301	301	301
LINF_230007400	1908	80062	80071	11.0587	+	79773	289	379	9	LinJ.23:80063-80112	62	46	G(16) > C(15) > A(11) > T(8)	350	350	350	350
LINF_230007500	917	81630	81627	17.012	+	81208	422	3203	3	LinJ.23:81631-81680	46	36	A(18) > G(14) > T(9) > C(9)	368	368	368	368
LINF_230007600	1672	85505	85507	17.8828	+	85342	163	331	2	LinJ.23:85506-85555	50	38	A(19) > C(13) > G(12) > T(6)	345	746	345	402
LINF_230007700	394	87907	87904	22.5888	+	86942	965	774	3	LinJ.23:87908-87957	58	60	T(15) > C(15) > G(14) > A(6)	-	-	-	-
LINF_230007800	972	93620	93643	29.6296	+	93329	291	341	23	LinJ.23:93621-93670	54	44	G(16) > A(12) > T(11) > C(11)	-	-	-	-
LINF_230008000	1330	102601	102600	22.0301	+	102181	420	313	1	LinJ.23:102602-102651	52	50	G(15) > T(14) > C(11) > A(10)	-	-	-	-
LINF_230008400	374	116644	116642	32.8877	+	116042	602	1074	2	LinJ.23:116645-116694	60	64	C(22) > A(10) > T(10) > G(8)	764	764	764	764
LINF_230008500	2076	118510	118774	19.3642	+	118299	211	373	264	LinJ.23:118511-118560	58	42	G(18) > A(11) > C(11) > T(10)	270	270	270	270
LINF_230008600	1289	120055	120042	21.4895	+	119946	109	161	13	LinJ.23:120056-120105	50	42	A(16) > G(13) > C(12) > T(9)	312	312	312	312
LINF_230008700	816	122116	122123	17.6471	+	121082	1034	2016	7	LinJ.23:122117-122166	54	22	A(21) > G(18) > C(9) > T(2)	397	403	397	397
LINF_230008800	1777	125609	125613	22.7349	+	125081	528	573	4	LinJ.23:125610-125659	50	44	A(18) > C(15) > G(10) > T(7)	364	364	364	364
LINF_230009300	509	149673	149979	23.7721	+	149439	234	780	306	LinJ.23:149674-149723	54	60	T(15) > C(15) > G(12) > A(8)	711	-	711	711
LINF_230009350	739	155730	155736	11.908	+	155591	139	185	6	LinJ.23:155731-155780	52	36	A(17) > G(15) > C(11) > T(7)	1449	209	209	209
LINF_230009600	1171	162756	162751	12.468	+	162513	243	1661	5	LinJ.23:162757-162806	58	62	C(20) > T(11) > A(10) > G(9)	-	-	-	-
LINF_230009800	377	174357	174354	31.0345	+	174169	188	62	3	LinJ.23:174358-174407	76	78	C(31) > T(8) > G(7) > A(4)	-	-	301	297
LINF_230010100	899	183026	183033	18.5762	+	182378	648	700	7	LinJ.23:183027-183076	38	42	A(22) > C(12) > T(9) > G(7)	267	-	267	267
LINF_230010300	1603	187097	187101	20.8359	+	186814	283	61	4	LinJ.23:187098-187147	58	54	C(16) > G(13) > T(11) > A(10)	208	208	208	208
LINF_230010400	445	188760	188759	28.764	+	187795	965	1015	1	LinJ.23:188761-188810	60	32	G(18) > A(16) > C(12) > T(4)	306	-	306	306
LINF_230010600	2407	193202	193208	16.7428	+	193025	177	1030	6	LinJ.23:193203-193252	46	38	A(19) > G(12) > C(11) > T(8)	-	-	-	-
LINF_230010800	1366	199562	199561	21.6691	+	199338	224	271	1	LinJ.23:199563-199612	42	46	T(17) > G(15) > A(12) > C(6)	-	-	-	-
LINF_230011000	97	210755	210756	17.5258	+	209136	1619	1459	1	LinJ.23:210756-210805	54	42	G(17) > A(12) > T(11) > C(10)	267	267	267	267
LINF_230011200	668	215831	215833	28.2934	+	215462	369	430	2	LinJ.23:215832-215881	32	30	A(26) > G(9) > T(8) > C(7)	229	229	224	229
LINF_230011300	570	218111	218112	12.4561	+	217787	324	376	1	LinJ.23:218112-218161	44	42	A(19) > C(12) > G(10) > T(9)	-	-	265	265
LINF_230011400	886	220427	220416	17.7201	+	220388	39	64	11	LinJ.23:220428-220477	62	42	G(18) > C(13) > A(11) > T(8)	-	-	-	-
LINF_230011500	141	222838	222817	26.2411	+	222715	123	2020	21	LinJ.23:222839-222888	44	40	A(16) > G(14) > T(12) > C(8)	-	-	-	-
LINF_230012700	118	225540	225544	26.2712	-	225926	386	ND	4	LinJ.23:225491-225540	46	36	A(22) > C(13) > G(10) > T(5)	-	-	-	-
LINF_230012800	4166	239074	239076	14.1623	-	239266	192	2417	2	LinJ.23:239025-239074	50	42	G(15) > A(14) > T(11) > C(10)	326	775	1165	326
LINF_230013100	245	248559	248557	17.551	-	248848	289	3044	2	LinJ.23:248510-248559	50	52	T(16) > G(15) > C(10) > A(9)	353	-	340	-
LINF_230013300	367	259976	259989	12.2616	-	260625	649	1312	13	LinJ.23:259927-259976	50	42	A(15) > G(14) > C(11) > T(10)	457	457	-	-
LINF_230013800	235	282497	282340	17.0213	-	283367	870	2016	157	LinJ.23:282448-282497	48	26	G(20) > A(17) > T(9) > C(4)	559	559	559	559
LINF_230014000	366	298616	298626	15.3005	-	298753	137	6171	10	LinJ.23:298567-298616	70	66	C(22) > G(13) > T(11) > A(4)	422	422	422	422
LINF_230014100	65	303603	305096	18.4615	-	305857	2254	2664	1493	LinJ.23:303554-303603	54	30	A(20) > G(15) > C(12) > T(3)	-	-	-	-
LINF_230014200	765	308858	308856	18.3007	-	309024	166	803	2	LinJ.23:308809-308858	50	32	A(21) > G(13) > C(12) > T(4)	462	462	462	462
LINF_230014600	247	324517	324515	19.0283	-	324965	448	2957	2	LinJ.23:324468-324517	58	24	G(23) > A(15) > T(6) > C(6)	-	-	-	-
LINF_230014800	57	330668	331785	12.2807	-	331833	1165	3155	1117	LinJ.23:330619-330668	44	38	A(23) > C(14) > G(8) > T(5)	-	-	-	-
LINF_230015500	401	375099	375089	14.7132	-	375517	418	2003	10	LinJ.23:375050-375099	48	18	A(24) > G(17) > C(7) > T(2)	330	330	330	330
LINF_230015600	50	383755	383757	24	-	384357	602	4140	2	LinJ.23:383706-383755	46	72	T(24) > C(12) > G(11) > A(3)	-	-	-	-
LINF_230015700	280	388608	388610	28.2143	-	388916	308	954	2	LinJ.23:388559-388608	60	44	C(16) > A(14) > G(14) > T(6)	-	-	-	-
LINF_230016200	156	406452	407114	27.5641	-	407687	1235	2313	662	LinJ.23:406403-406452	52	44	A(14) > G(14) > C(12) > T(10)	326	326	326	326
LINF_230016800	1006	426114	426103	12.1272	-	426403	289	344	11	LinJ.23:426065-426114	54	42	A(15) > G(14) > C(13) > T(8)	-	-	11	11
LINF_230017400	379	458791	458725	22.9551	-	458907	116	350	66	LinJ.23:458742-458791	50	78	T(20) > C(19) > G(6) > A(5)	648	648	648	648
LINF_230017600	45	468063	468062	31.1111	-	470717	2654	2938	1	LinJ.23:468014-468063	48	38	A(18) > G(13) > C(11) > T(8)	-	-	-	-
LINF_230017700	2376	472863	472859	21.5488	-	472987	124	178	4	LinJ.23:472814-472863	52	70	C(20) > T(15) > A(9) > G(6)	-	-	-	-
LINF_230017800	701	474111	474132	13.1241	-	474264	153	219	21	LinJ.23:474062-474111	38	36	A(20) > G(12) > T(11) > C(7)	248	248	275	275
LINF_230018000	857	481300	481448	17.5029	-	481859	559	1357	148	LinJ.23:481251-481300	50	70	T(18) > C(17) > G(8) > A(7)	-	-	-	-
LINF_230018100	1348	484936	484925	23.2938	-	485406	470	1384	11	LinJ.23:484887-484936	54	44	A(15) > C(14) > G(13) > T(8)	285	285	285	285
LINF_230018650	5297	509673	509667	20.37	-	510745	1072	1128	6	LinJ.23:509624-509673	62	32	A(17) > G(17) > C(14) > T(2)	396	396	396	396
LINF_230019200	937	523752	523747	13.8741	-	523949	197	133	5	LinJ.23:523703-523752	54	34	A(21) > C(15) > G(12) > T(2)	-	-	302	346
LINF_230019300	941	525899	525906	46.1211	-	526024	125	170	7	LinJ.23:525850-525899	54	42	A(20) > C(18) > G(9) > T(3)	367	367	367	323
LINF_230019400	1801	527774	527764	15.2693	-	527867	93	143	10	LinJ.23:527725-527774	54	38	A(17) > G(14) > C(13) > T(6)	331	-	326	326
LINF_230019500	770	529722	529748	18.4416	-	530136	414	464	26	LinJ.23:529673-529722	48	54	C(17) > A(16) > T(10) > G(7)	255	255	248	255
LINF_230020000	449	553235	553234	19.1537	-	553589	354	1068	1	LinJ.23:553186-553235	58	52	C(16) > G(13) > A(11) > T(10)	314	314	314	314
LINF_230020200	664	562890	563069	12.3494	-	562994	104	1287	179	LinJ.23:562841-562890	54	42	G(16) > A(13) > C(11) > T(10)	286	286	286	286
LINF_230020300	456	565096	565107	12.9386	-	565281	185	224	11	LinJ.23:565047-565096	32	42	A(24) > C(11) > T(10) > G(5)	245	-	245	245
LINF_230020400	3429	572481	572425	15.0773	+	572403	78	21	56	LinJ.23:572482-572531	44	62	T(18) > C(13) > A(10) > G(9)	173	173	173	173
LINF_230020600	1196	576524	576526	26.9231	+	576484	40	92	2	LinJ.23:576525-576574	52	40	A(17) > G(13) > C(13) > T(7)	280	280	280	280
LINF_230020700	2052	577345	577468	21.9786	+	577253	92	142	123	LinJ.23:577346-577395	64	44	G(19) > C(13) > A(9) > T(9)	469	-	469	473
LINF_230020900	497	583169	583173	16.7002	+	582836	333	387	4	LinJ.23:583170-583219	44	52	A(14) > T(14) > C(12) > G(10)	364	364	364	364
LINF_230021000	567	585477	585479	17.9894	+	584830	647	618	2	LinJ.23:585478-585527	48	50	A(14) > C(13) > T(12) > G(11)	483	-	483	-
LINF_230021100	269	589139	589141	20.8178	+	587881	1258	1232	2	LinJ.23:589140-589189	52	36	A(21) > C(15) > G(11) > T(3)	477	477	477	477
LINF_230021200	2149	590728	590730	16.1005	+	590376	352	404	2	LinJ.23:590729-590778	50	28	A(18) > G(18) > T(7) > C(7)	-	-	464	464
LINF_230021400	316	599286	599285	15.8228	+	599125	161	208	1	LinJ.23:599287-599336	50	56	C(20) > A(17) > T(8) > G(5)	389	389	389	389
LINF_230021600	313	607560	607563	31.6294	+	607017	543	62	3	LinJ.23:607561-607610	54	50	C(17) > A(15) > G(10) > T(8)	299	299	299	299
LINF_230021700	1772	608967	608965	24.605	+	608688	279	329	2	LinJ.23:608968-609017	54	36	A(21) > C(16) > G(11) > T(2)	636	636	636	636
LINF_230021900	110	613891	613890	36.3636	+	612886	1005	1433	1	LinJ.23:613892-613941	52	36	G(17) > A(15) > T(9) > C(9)	-	-	-	-
LINF_230022100	416	624923	624925	23.5577	+	624850	73	2519	2	LinJ.23:624924-624973	54	44	A(15) > C(14) > G(13) > T(8)	376	376	376	376
LINF_230022300	283	635423	634188	11.3074	+	633839	1584	2561	1235	LinJ.23:635424-635473	54	38	A(19) > C(15) > G(12) > T(4)	525	525	525	525
LINF_230022800	423	669949	669948	23.4043	+	669612	337	387	1	LinJ.23:669950-669999	56	50	G(16) > T(13) > C(12) > A(9)	-	-	-	-
LINF_230023000	207	675984	677745	12.5604	+	675820	164	3063	1761	LinJ.23:675985-676034	56	40	A(17) > C(15) > G(13) > T(5)	378	378	378	378
LINF_230023200	2348	687235	687233	24.3186	+	687061	174	184	2	LinJ.23:687236-687285	62	36	G(19) > A(13) > C(12) > T(6)	197	197	197	197
LINF_230023400	272	694107	694113	13.9706	+	692917	1190	1860	6	LinJ.23:694108-694157	66	20	G(24) > A(16) > C(9) > T(1)	645	896	645	645
LINF_230023500	533	696706	696770	15.197	+	696174	532	336	64	LinJ.23:696707-696756	56	44	G(17) > A(11) > T(11) > C(11)	-	-	272	272
LINF_230023800	126	709787	710513	19.0476	+	709340	447	1104	726	LinJ.23:709788-709837	56	54	G(15) > T(14) > C(13) > A(8)	1011	1011	910	910
LINF_230023900	561	712286	712284	33.1551	+	711787	499	562	2	LinJ.23:712287-712336	56	40	G(16) > A(14) > C(12) > T(8)	555	555	555	555
LINF_230024000	754	713914	713923	23.2095	+	713618	296	516	9	LinJ.23:713915-713964	56	62	C(17) > T(14) > G(11) > A(8)	-	-	-	-
LINF_230024100	339	716771	716779	12.6844	+	716600	171	221	8	LinJ.23:716772-716821	56	38	A(18) > C(15) > G(13) > T(4)	512	512	512	512
LINF_230024200	805	717958	717959	21.7391	+	717785	173	235	1	LinJ.23:717959-718008	58	30	A(20) > G(15) > C(14) > T(1)	305	305	305	305
LINF_230024300	1025	719157	719161	37.6585	+	718901	256	317	4	LinJ.23:719158-719207	56	58	C(19) > A(12) > T(10) > G(9)	-	-	313	-
LINF_230024400	592	721875	721874	39.1892	+	721504	371	231	1	LinJ.23:721876-721925	60	66	C(20) > T(13) > G(10) > A(7)	346	346	346	346
LINF_230024500	599	723896	723892	23.0384	+	723040	856	629	4	LinJ.23:723897-723946	64	74	C(22) > T(15) > G(10) > A(3)	308	308	308	308
LINF_230024600	1544	725568	725567	28.3679	+	725070	498	548	1	LinJ.23:725569-725618	60	48	G(19) > T(13) > C(11) > A(7)	-	-	-	-
LINF_230024700	297	729800	729902	9.42761	+	728947	853	993	102	LinJ.23:729801-729850	50	42	A(16) > G(13) > C(12) > T(9)	481	481	481	481
LINF_230025100	222	742415	742314	18.4685	+	741232	1183	1338	101	LinJ.23:742416-742465	58	64	C(24) > A(13) > T(8) > G(5)	424	-	424	435
LINF_230025200	642	744614	744613	20.405	+	743615	999	554	1	LinJ.23:744615-744664	74	68	C(29) > A(8) > G(8) > T(5)	619	619	619	619
LINF_230025300	560	747158	747157	13.3929	+	746974	184	587	1	LinJ.23:747159-747208	70	68	C(24) > G(11) > T(10) > A(5)	753	753	243	243
LINF_230025400	618	748836	748835	31.3916	+	748698	138	188	1	LinJ.23:748837-748886	66	36	G(20) > C(13) > A(12) > T(5)	385	385	385	385
LINF_230025500	904	751049	751060	20.354	+	750148	901	ND	11	LinJ.23:751050-751099	54	34	A(17) > G(16) > C(11) > T(6)	385	385	385	385
LINF_230025600	968	752970	752969	16.6322	+	752536	434	2290	1	LinJ.23:752971-753020	56	34	A(18) > G(15) > C(13) > T(4)	116	116	116	116
LINF_230025800	739	760282	760285	20.7037	+	759946	336	602	3	LinJ.23:760283-760332	58	30	A(18) > G(17) > C(12) > T(3)	616	-	616	616
LINF_230026000	494	767555	767551	15.7895	+	767486	69	130	4	LinJ.23:767556-767605	58	42	G(17) > A(12) > C(12) > T(9)	-	-	-	682
LINF_230026100	582	771636	771635	20.1031	+	771353	283	285	1	LinJ.23:771637-771686	68	70	C(24) > T(11) > G(10) > A(5)	-	-	-	-
LINF_230026300	51	779861	779851	21.5686	+	779488	373	427	10	LinJ.23:779862-779911	62	52	G(17) > C(14) > T(12) > A(7)	-	413	413	413
LINF_230026400	511	784290	782086	9.00196	+	783370	920	739	2204	LinJ.23:784291-784340	58	72	C(22) > T(14) > A(7) > G(7)	209	209	209	209
LINF_230026500	3832	785437	785433	19.1284	+	785049	388	ND	4	LinJ.23:785438-785487	60	56	C(18) > G(12) > A(10) > T(10)	-	-	-	-
LINF_240004000	399	5759	5752	18.2957	+	5408	351	403	7	LinJ.24:5760-5809	40	40	A(17) > T(13) > G(13) > C(7)	221	221	221	221
LINF_240005000	987	7763	7762	27.5583	+	7537	226	288	1	LinJ.24:7764-7813	38	26	A(22) > G(15) > T(9) > C(4)	214	214	214	214
LINF_240005100	2023	8625	8648	24.2215	+	8503	122	195	23	LinJ.24:8626-8675	48	44	G(16) > T(14) > A(12) > C(8)	270	270	270	270
LINF_240005200	19357	9472	9474	33.8172	+	9411	61	115	2	LinJ.24:9473-9522	48	30	A(18) > G(17) > T(8) > C(7)	315	315	315	315
LINF_240005300	1290	11469	11467	30.8527	+	11266	203	253	2	LinJ.24:11470-11519	52	30	G(20) > A(15) > T(9) > C(6)	299	299	299	299
LINF_240005500	1045	15656	15646	10.622	+	15331	325	415	10	LinJ.24:15657-15706	46	38	A(18) > G(13) > C(10) > T(9)	404	404	404	404
LINF_240005600	1345	17733	17711	30.0372	+	17571	162	212	22	LinJ.24:17734-17783	52	60	T(16) > C(14) > G(12) > A(8)	400	400	400	400
LINF_240005800	1373	20968	20973	24.2535	+	20487	481	554	5	LinJ.24:20969-21018	58	42	G(15) > A(14) > C(14) > T(7)	368	368	368	368
LINF_240006100	1177	28760	28744	19.4562	+	28306	454	494	16	LinJ.24:28761-28810	68	38	G(21) > C(13) > A(10) > T(6)	280	280	280	280
LINF_240006400	1628	34509	34507	33.1081	+	34122	387	437	2	LinJ.24:34510-34559	48	42	A(16) > G(13) > C(11) > T(10)	370	-	318	-
LINF_240006600	91	41635	41628	21.978	+	40079	1556	2139	7	LinJ.24:41636-41685	48	42	A(17) > G(12) > C(12) > T(9)	351	351	292	292
LINF_240006700	2707	43915	43822	12.0429	+	43670	245	889	93	LinJ.24:43916-43965	54	34	G(19) > A(14) > T(9) > C(8)	-	-	299	299
LINF_240006800	561	46078	46022	18.0036	+	45772	306	184	56	LinJ.24:46079-46128	62	52	C(18) > G(13) > A(11) > T(8)	-	-	335	-
LINF_240007000	781	52034	52028	16.3892	+	51526	508	552	6	LinJ.24:52035-52084	58	44	G(15) > C(14) > A(13) > T(8)	362	-	362	362
LINF_240007300	292	67938	67941	34.9315	+	67491	447	500	3	LinJ.24:67939-67988	56	50	C(18) > A(15) > G(10) > T(7)	-	-	-	-
LINF_240007500	127	76663	76666	19.685	+	75588	1075	3586	3	LinJ.24:76664-76713	58	32	G(18) > A(16) > C(11) > T(5)	617	617	617	617
LINF_240007700	281	88801	88804	23.8434	+	88492	309	353	3	LinJ.24:88802-88851	56	52	C(15) > G(13) > A(11) > T(11)	-	-	-	-
LINF_240007800	34	91169	93815	17.6471	+	90435	734	3569	2646	LinJ.24:91170-91219	56	46	G(15) > C(13) > A(12) > T(10)	-	-	-	-
LINF_240007900	237	97317	97300	13.0802	+	96074	1243	1509	17	LinJ.24:97318-97367	70	70	C(32) > A(12) > T(3) > G(3)	-	-	-	-
LINF_240008000	248	101873	101872	29.0323	+	101460	413	463	1	LinJ.24:101874-101923	70	58	C(23) > G(12) > A(9) > T(6)	-	-	350	350
LINF_240008200	1865	107476	107475	20.0536	+	107020	456	3029	1	LinJ.24:107477-107526	54	46	G(16) > T(12) > A(11) > C(11)	654	654	654	654
LINF_240008500	378	126701	126697	13.7566	+	125247	1454	1509	4	LinJ.24:126702-126751	60	22	G(21) > A(18) > C(9) > T(2)	-	-	-	-
LINF_240008900	290	142957	142949	20	+	142660	297	119	8	LinJ.24:142958-143007	64	58	C(17) > G(15) > T(12) > A(6)	392	390	390	390
LINF_240009000	670	144992	145129	15.0746	+	144579	413	647	137	LinJ.24:144993-145042	64	34	G(18) > A(15) > C(14) > T(3)	-	-	-	-
LINF_240009300	370	163715	163757	19.7297	+	163183	532	3152	42	LinJ.24:163716-163765	66	44	G(20) > C(13) > T(9) > A(8)	358	358	314	358
LINF_240009400	731	167808	167814	14.5007	+	167210	598	648	6	LinJ.24:167809-167858	52	30	A(18) > G(17) > C(9) > T(6)	372	372	372	372
LINF_240009500	1094	169936	169938	25.1371	+	169478	458	3859	2	LinJ.24:169937-169986	52	36	A(20) > C(14) > G(12) > T(4)	-	-	-	-
LINF_240009600	130	178644	178651	15.3846	+	177788	856	913	7	LinJ.24:178645-178694	48	32	A(19) > G(15) > C(9) > T(7)	-	-	-	-
LINF_240009900	200	189659	189663	42	+	189361	298	670	4	LinJ.24:189660-189709	50	72	C(19) > T(17) > A(8) > G(6)	-	-	-	319
LINF_240010000	120	194175	194181	23.3333	+	192880	1295	1409	6	LinJ.24:194176-194225	58	44	C(15) > A(14) > G(14) > T(7)	553	553	553	553
LINF_240010100	771	195997	196000	11.4137	+	195572	425	481	3	LinJ.24:195998-196047	48	28	A(22) > G(14) > C(10) > T(4)	231	-	518	518
LINF_240010200	600	198576	198574	15.3333	+	198341	235	283	2	LinJ.24:198577-198626	48	34	A(19) > G(14) > C(10) > T(7)	594	594	594	594
LINF_240010300	1152	201177	201067	11.8056	+	200971	206	385	110	LinJ.24:201178-201227	56	56	C(18) > A(12) > T(10) > G(10)	1422	481	481	481
LINF_240010400	217	202366	202352	49.3088	+	202238	128	55	14	LinJ.24:202367-202416	54	66	C(21) > T(12) > A(11) > G(6)	233	233	233	233
LINF_240010500	486	203995	203980	23.251	+	203335	660	289	15	LinJ.24:203996-204045	60	70	C(21) > T(14) > G(9) > A(6)	284	284	284	284
LINF_240011000	398	218323	218315	14.3216	+	217939	384	861	8	LinJ.24:218324-218373	52	26	A(19) > G(18) > C(8) > T(5)	-	-	-	-
LINF_240011200	342	226616	226614	13.7427	+	225903	713	894	2	LinJ.24:226617-226666	64	68	C(23) > T(11) > G(9) > A(7)	423	423	423	423
LINF_240011500	268	236593	236399	14.1791	+	236249	344	198	194	LinJ.24:236594-236643	48	30	A(25) > C(14) > G(10) > T(1)	181	181	181	181
LINF_240012000	355	256333	256331	22.2535	+	256013	320	363	2	LinJ.24:256334-256383	46	38	G(16) > A(15) > T(12) > C(7)	403	795	403	403
LINF_240012100	938	258516	258371	12.8998	+	258371	145	199	145	LinJ.24:258517-258566	56	46	C(15) > A(14) > G(13) > T(8)	269	269	269	252
LINF_240012200	1139	259742	259737	16.3301	+	259249	493	539	5	LinJ.24:259743-259792	36	44	A(18) > T(14) > G(10) > C(8)	-	-	405	-
LINF_240012700	63	277471	277470	36.5079	+	277336	135	2547	1	LinJ.24:277472-277521	66	76	C(26) > T(12) > G(7) > A(5)	-	-	263	1403
LINF_240013000	615	288512	288502	17.561	+	288204	308	218	10	LinJ.24:288513-288562	56	34	A(19) > G(14) > C(14) > T(3)	331	-	331	-
LINF_240013100	736	291062	290973	15.4891	+	290777	285	147	89	LinJ.24:291063-291112	64	64	C(18) > T(14) > G(14) > A(4)	245	245	245	245
LINF_240013200	671	293817	293888	13.7109	+	293330	487	320	71	LinJ.24:293818-293867	54	74	C(20) > T(17) > G(7) > A(6)	-	-	-	-
LINF_240013300	156	303820	303475	10.2564	+	302742	1078	1297	345	LinJ.24:303821-303870	58	42	G(16) > A(13) > C(13) > T(8)	-	-	180	-
LINF_240013400	429	307372	307379	10.0233	+	306496	876	931	7	LinJ.24:307373-307422	54	28	A(21) > G(15) > C(12) > T(2)	366	366	366	366
LINF_240013500	812	309385	309367	43.1034	+	308583	802	556	18	LinJ.24:309386-309435	64	62	C(22) > G(10) > A(9) > T(9)	182	182	182	182
LINF_240013700	1283	311254	311277	24.3959	+	310467	787	1118	23	LinJ.24:311255-311304	54	52	C(16) > A(13) > G(11) > T(10)	445	445	445	445
LINF_240014100	291	321413	321412	26.8041	+	320995	418	137	1	LinJ.24:321414-321463	62	56	G(17) > T(14) > C(14) > A(5)	-	-	-	393
LINF_240014200	587	325793	325783	16.6951	+	325429	364	356	10	LinJ.24:325794-325843	56	46	G(15) > C(13) > A(12) > T(10)	-	-	412	412
LINF_240014600	1807	335873	335869	17.5982	+	335320	553	179	4	LinJ.24:335874-335923	58	50	G(15) > C(14) > T(11) > A(10)	322	325	322	322
LINF_240014800	173	341903	341893	19.0751	+	341659	244	364	10	LinJ.24:341904-341953	62	54	C(21) > A(13) > G(10) > T(6)	-	-	219	219
LINF_240014900	512	344710	344704	16.6016	+	344518	192	869	6	LinJ.24:344711-344760	58	40	G(17) > A(13) > C(12) > T(8)	535	544	530	530
LINF_240015200	925	356081	356075	36.8649	+	355697	384	434	6	LinJ.24:356082-356131	58	28	A(18) > G(18) > C(11) > T(3)	397	397	397	397
LINF_240015300	985	358101	358086	25.0761	+	357906	195	964	15	LinJ.24:358102-358151	62	66	C(22) > T(11) > G(9) > A(8)	362	362	362	362
LINF_240015500	583	363729	363730	25.2144	+	363256	473	162	1	LinJ.24:363730-363779	54	48	C(15) > A(14) > G(12) > T(9)	-	-	349	-
LINF_240015700	532	372617	372613	13.1579	+	372330	287	175	4	LinJ.24:372618-372667	54	44	A(15) > C(14) > G(13) > T(8)	324	324	324	324
LINF_240015800	881	374957	374958	23.8365	+	374587	370	415	1	LinJ.24:374958-375007	60	58	C(18) > G(12) > T(11) > A(9)	-	-	-	-
LINF_240016000	260	386445	386781	12.3077	+	385607	838	1171	336	LinJ.24:386446-386495	66	58	C(17) > G(16) > T(12) > A(5)	-	-	599	599
LINF_240016200	707	393598	393451	9.90099	+	393344	254	554	147	LinJ.24:393599-393648	52	34	A(19) > G(14) > C(12) > T(5)	-	-	-	-
LINF_240016600	473	414109	414108	28.9641	+	413607	502	424	1	LinJ.24:414110-414159	80	68	C(29) > G(11) > A(5) > T(5)	319	319	319	319
LINF_240016900	314	425923	425922	44.2675	+	425040	883	5677	1	LinJ.24:425924-425973	56	34	G(18) > A(15) > C(10) > T(7)	359	359	359	-
LINF_240017000	588	434819	434821	13.7755	+	434761	58	120	2	LinJ.24:434820-434869	46	44	A(18) > C(13) > G(10) > T(9)	-	277	277	277
LINF_240017100	350	439075	439074	14.5714	+	437898	1177	1217	1	LinJ.24:439076-439125	48	34	A(17) > G(16) > T(9) > C(8)	456	456	456	456
LINF_240017200	2036	440771	440770	9.97053	+	440632	139	53	1	LinJ.24:440772-440821	46	42	G(16) > T(14) > A(13) > C(7)	345	345	345	345
LINF_240017500	369	450972	450823	37.1274	+	450682	290	357	149	LinJ.24:450973-451022	60	42	C(19) > A(18) > G(11) > T(2)	-	-	440	-
LINF_240017600	351	453829	453828	15.0997	+	453447	382	1235	1	LinJ.24:453830-453879	50	62	C(16) > T(15) > A(10) > G(9)	314	314	314	314
LINF_240017800	148	460557	460561	19.5946	+	459148	1409	1465	4	LinJ.24:460558-460607	48	42	A(18) > C(13) > G(11) > T(8)	-	-	355	355
LINF_240018100	616	474685	474683	18.0195	+	474379	306	201	2	LinJ.24:474686-474735	48	36	G(18) > A(14) > T(12) > C(6)	-	-	-	274
LINF_240018200	347	478134	478133	31.7003	+	478037	97	4222	1	LinJ.24:478135-478184	54	44	A(21) > C(20) > G(7) > T(2)	-	-	-	-
LINF_240018300	2015	483670	483668	34.0943	+	483530	140	190	2	LinJ.24:483671-483720	44	34	A(21) > G(12) > C(10) > T(7)	198	198	198	198
LINF_240018400	3345	484562	484567	33.722	+	484510	52	97	5	LinJ.24:484563-484612	36	50	A(16) > T(16) > G(9) > C(9)	214	214	214	214
LINF_240018500	1886	485451	485454	18.7169	+	485394	57	166	3	LinJ.24:485452-485501	42	44	A(15) > T(14) > G(13) > C(8)	169	165	169	169
LINF_240018800	319	492546	492541	21.0031	+	492223	323	1366	5	LinJ.24:492547-492596	56	28	A(19) > G(17) > C(11) > T(3)	294	294	294	294
LINF_240019000	465	499173	499172	29.0323	+	498122	1051	1115	1	LinJ.24:499174-499223	46	50	T(15) > G(13) > A(12) > C(10)	395	395	395	395
LINF_240019100	1369	501522	501519	8.10811	+	501311	211	1645	3	LinJ.24:501523-501572	56	24	G(22) > A(16) > T(6) > C(6)	-	-	-	-
LINF_240019300	202	509097	509091	26.7327	+	507812	1285	1335	6	LinJ.24:509098-509147	54	32	A(17) > G(17) > C(10) > T(6)	410	410	410	410
LINF_240019400	756	510684	510696	25.5291	+	510288	396	1217	12	LinJ.24:510685-510734	60	50	C(20) > A(15) > G(10) > T(5)	-	-	-	-
LINF_240019700	632	532309	532314	19.1456	+	532198	111	161	5	LinJ.24:532310-532359	60	48	G(17) > C(13) > T(11) > A(9)	-	-	-	-
LINF_240019800	447	535967	535946	13.8702	+	535617	350	4053	21	LinJ.24:535968-536017	64	48	C(19) > A(13) > G(13) > T(5)	213	213	213	213
LINF_240019900	1018	541830	541824	25.2456	+	541713	117	174	6	LinJ.24:541831-541880	64	28	G(20) > A(16) > C(12) > T(2)	-	-	480	480
LINF_240020100	770	560875	560877	21.4286	+	560465	410	462	2	LinJ.24:560876-560925	36	26	A(27) > G(10) > C(8) > T(5)	-	-	-	-
LINF_240020200	63	571171	571223	22.2222	+	570457	714	2036	52	LinJ.24:571172-571221	62	62	C(22) > A(10) > T(9) > G(9)	305	305	305	305
LINF_240020300	826	575067	575066	21.5496	+	575032	35	68	1	LinJ.24:575068-575117	60	38	G(18) > A(13) > C(12) > T(7)	-	331	331	331
LINF_240020400	677	577428	577463	13.5894	+	576776	652	708	35	LinJ.24:577429-577478	60	46	C(16) > G(14) > A(13) > T(7)	591	591	591	591
LINF_240020600	1046	581479	581478	16.826	+	580589	890	1281	1	LinJ.24:581480-581529	60	28	G(20) > A(16) > C(10) > T(4)	-	-	738	-
LINF_240020700	755	585858	586078	16.6887	+	585773	85	1650	220	LinJ.24:585859-585908	68	48	G(19) > C(15) > T(9) > A(7)	-	539	539	-
LINF_240020800	404	593633	593636	25	+	593307	326	368	3	LinJ.24:593634-593683	52	40	A(15) > G(15) > C(11) > T(9)	400	280	280	280
LINF_240020900	1030	594938	594934	30.0971	+	594749	189	1	4	LinJ.24:594939-594988	52	74	T(19) > C(18) > G(8) > A(5)	-	-	-	-
LINF_240021000	728	598561	598557	17.8571	+	598279	282	338	4	LinJ.24:598562-598611	50	26	A(19) > G(18) > C(7) > T(6)	-	-	-	-
[truncated: 2,589 more rows]

## Sheet: TableS3 FL reads per transcript
TriTrypDB Gene ID	CDS length (bp)	PRO (P1+P2)		AMA (A1+A2)
		# FL reads	Nanopore average FL reads length (nt)	# FL reads	Nanopore average FL reads length (nt)
LINF_010005000	1002	2	3161	12	2644.42
LINF_010005100	1635	15	1948.07	30	2030.17
LINF_010005200	2022	3	2902.33	4	2847.75
LINF_010005300	561	97	864.196	217	854.894
LINF_010005400	1998	4	2535	16	2675.31
LINF_010005500	750	26	1306.62	21	1334.43
LINF_010005600	1740	8	2218.75	16	2303.62
LINF_010005700	714	69	972.928	80	972.112
LINF_010005800	819	14	1752.79	28	1764.39
LINF_010005900	957	16	1529.38	40	1522.3
LINF_010006000	588	161	1039.52	191	1046.28
LINF_010006100	1974	14	2443.71	35	2408.57
LINF_010006200	1095	18	1657.67	18	1726.72
LINF_010006300	249	7	1529	15	1589.67
LINF_010006400	351	155	591.084	132	594.197
LINF_010006500	243	198	571.692	187	579.989
LINF_010006600	1374	2	3614.5	10	3387.1
LINF_010006700	2313	8	2698.12	16	2849.25
LINF_010006800	624	53	1123.02	64	1093.8
LINF_010006900	807	65	1092.12	80	1086.83
LINF_010007000	2697	4	3071.25	9	3437.22
LINF_010007100	1005	34	1526.03	16	1628.88
LINF_010007200	417	95	1146.16	78	1440.79
LINF_010007300	2769	7	2944.57	4	2944
LINF_010007400	2388	3	2811.67	3	2623.67
LINF_010007500	846	27	1597.07	53	1668.26
LINF_010007600	324	27	1563.93	34	1653.53
LINF_010007700	1242	43	1789.47	101	1779.31
LINF_010007800	519	370	885.543	336	895.435
LINF_010007900	180	2171	628.667	1347	630.739
LINF_010008000	1164	202	1206.52	140	1216.84
LINF_010008100	432	183	570.071	31	578.387
LINF_010008200	924	72	1176.43	59	1176.73
LINF_010008300	633	159	802.283	331	818.876
LINF_010008400	294	214	864.85	130	895.931
LINF_010008500	777	55	1355.85	126	1359.83
LINF_010008600	2247	-	-	2	3229.5
LINF_010008700	570	141	832.241	651	838.989
LINF_010008800	567	40	932.675	71	904.845
LINF_010008900	2451	1	2848	7	2876.43
LINF_010009000	2466	8	2770.88	8	2810.62
LINF_010009100	1707	3	1787.67	11	1813
LINF_010009200	603	1629	1032.66	1244	1035.34
LINF_010009300	603	4145	738.937	3066	737.652
LINF_010009400	2235	5	2576	18	2616.94
LINF_010009600	657	56	1334.23	92	1316.36
LINF_010009800	2091	30	2408.03	36	2464.94
LINF_010009900	1080	35	1756.74	53	1721.06
LINF_010010000	2097	8	2954.62	10	2951.9
LINF_010010100	2124	1	4268	10	2483.3
LINF_010010200	240	131	992.16	142	1029.18
LINF_010010300	2148	3	3461	8	3112.88
LINF_010010400	4857	-	-	1	5129
LINF_010010500	2046	8	2950.38	15	2937.2
LINF_010010600	1107	65	1596.97	80	1610.84
LINF_010010700	1869	6	2063.17	28	2083.89
LINF_010010800	981	273	1166.41	321	1157.9
LINF_010010900	2895	3	3174.67	6	3023.5
LINF_010011000	1275	38	1728.18	124	1746.59
LINF_010011100	5454	-	-	1	5545
LINF_010011200	732	52	1228.6	128	1226.97
LINF_010011300	1773	5	2574.2	2	2349
LINF_010011400	2124	8	4082	6	3949.17
LINF_010011500	3336	4	3588.5	-	-
LINF_010011600	1485	48	1898.08	69	1893.86
LINF_010011700	4497	-	-	1	5185
LINF_010011800	909	4	2318	14	2520.57
LINF_010011900	2406	2	4115	5	4094.2
LINF_010012000	702	39	1383.79	67	1470.87
LINF_010012100	1062	5	2861.2	18	2430.94
LINF_010012200	1620	7	2256.57	17	2265.47
LINF_010012300	4833	1	4595	4	4679.75
LINF_010012500	2265	2	3055	1	2964
LINF_010012600	4248	2	4276.5	1	4400
LINF_010012700	1023	85	1406.12	111	1392.45
LINF_010012800	1212	18	2648.78	54	2632.48
LINF_010012900	1212	13	2478.15	9	2328.44
LINF_010013000	1593	18	2042.06	38	2113.53
LINF_010013100	1473	42	1574.69	120	1675.39
LINF_010013200	3054	-	-	3	4315.67
LINF_010013300	3699	-	-	11	3827.64
LINF_020005000	2448	-	-	6	3120
LINF_020005100	303	2092	503.5	266	504.12
LINF_020005200	621	53	1201.11	109	1213.59
LINF_020005300	1860	25	2272.28	37	2370.35
LINF_020005400	657	29	2104.59	48	2131.73
LINF_020005500	579	53	823.943	93	842.516
LINF_020005600	1194	45	1286.82	71	1374.75
LINF_020005700	2982	5	3813.2	16	3712.88
LINF_020005800	945	17	1498.59	55	1636.56
LINF_020005900	1065	30	2033.7	41	2099.83
LINF_020006000	2928	1	5094	4	5206.5
LINF_020006100	3501	-	-	1	3992
LINF_020006300	720	293	1071.86	196	1033.15
LINF_020006400	2688	1	3410	4	3538.25
LINF_020006500	5913	1	6387	2	6207.5
LINF_020006700	2454	1	2784	-	-
LINF_020006800	2433	2	3310	-	-
LINF_020006900	1965	2	3365.5	13	3510
LINF_020007000	2319	1	4617	3	4562
LINF_020007200	2343	2	3944.5	2	3122
LINF_020007300	2982	-	-	1	3664
LINF_020007400	2709	3	3633.67	10	3657.7
LINF_020007500	3441	1	3566	7	4071.29
LINF_020007600	825	15	1919.67	46	1895.52
LINF_020007700	195	40	1321.05	53	1323.49
LINF_020007800	510	37	1609.59	60	1658.63
LINF_020007900	1593	21	1996.76	29	1996.55
LINF_020008100	2073	18	2414.5	23	2892.57
LINF_020008200	975	25	1327.16	32	1325.66
LINF_020008400	2919	4	3387.25	8	3369.5
LINF_020008500	3186	8	3046.62	4	3454
LINF_020008600	1146	20	2133.55	25	2305.48
LINF_020008700	1590	3	2945.67	7	2940.43
LINF_020008800	1374	43	1584.49	51	1569.06
LINF_020008900	459	8	1546.5	17	1506.59
LINF_020009100	3081	1	3404	18	3401
LINF_020009200	3060	-	-	7	4474.57
LINF_020009300	1113	50	1363.08	96	1364.97
LINF_020009700	834	39	2050.46	44	2038.7
LINF_020009800	876	3	1367.67	8	1978.38
LINF_020010000	606	17	1681.82	29	1732.14
LINF_020010100	2130	2	3795.5	5	3841.4
LINF_020010200	2850	-	-	7	3061.71
LINF_020010300	513	14	1249.14	77	1184.31
LINF_020010600	2592	1	2983	14	3444.43
LINF_020010700	981	5	2337.4	14	2238.57
LINF_020010800	492	255	1426.4	67	1412.9
LINF_020010900	2544	6	2933.33	23	2958.91
LINF_020011200	1536	4	1987.5	12	1943.17
LINF_020011300	633	15	1511.73	19	1648.63
LINF_020011400	966	8	1612.62	6	1636.17
LINF_020011500	1704	19	2009.74	42	2049.43
LINF_020011600	1980	1	2793	6	2892.67
LINF_020011700	4245	-	-	1	4028
LINF_020011800	948	34	1294.62	41	1359.46
LINF_020011900	2733	4	2838.75	10	2871.1
LINF_020012000	942	29	1632.66	39	1536.64
LINF_020012100	579	90	1714.92	113	1728.43
LINF_020012200	1365	62	1658.9	60	1641.77
LINF_020012300	2811	2	3612.5	-	-
LINF_020012400	2454	3	3122.67	2	3078
LINF_020012430	243	16	982.438	35	1512.94
LINF_020012460	546	6	1696.67	26	1796.62
LINF_030005100	807	76	1085.26	82	1100.18
LINF_030005200	1224	50	1822.66	91	1856.07
LINF_030005300	1146	7	2871.86	16	3127.56
LINF_030005400	1173	66	1381.29	122	1404.25
LINF_030005500	2502	14	2524.64	39	2533.92
LINF_030005600	1887	23	2616.39	50	2724.42
LINF_030005700	1704	8	2494.88	23	2379
LINF_030005800	495	119	1252.78	142	1294.89
LINF_030005900	2676	2	2926.5	12	2913.92
LINF_030006000	2778	6	3205.67	11	3257.09
LINF_030006100	549	161	926.497	201	947.303
LINF_030006200	420	235	1115.83	139	1141.98
LINF_030006300	936	90	1288.53	94	1336.21
LINF_030006400	2175	6	2432	15	2431.07
LINF_030006500	576	270	817.596	171	821.848
LINF_030006600	1875	8	2176	9	2171.33
LINF_030006700	633	72	1571.6	65	1535.98
LINF_030006800	1683	19	2729.58	25	2725.48
LINF_030006900	1140	9	1942.33	10	1856.4
LINF_030007000	942	66	1396.42	117	1367.82
LINF_030007100	2115	1	4531	9	3204.44
LINF_030007200	465	208	734.154	261	766.927
LINF_030007300	252	1991	850.501	1820	851.781
LINF_030007400	909	31	1378.71	64	1430.14
LINF_030007600	3006	10	3073	29	3065.45
LINF_030007900	6219	-	-	1	6269
LINF_030008000	3132	2	3530.5	2	3634
LINF_030008100	1893	14	2290.5	31	2301.26
LINF_030008200	1029	3	1445	8	1573.5
LINF_030008300	4542	1	5369	5	5280.4
LINF_030008500	933	3	2484.67	5	2029.2
LINF_030008600	1113	3	1962.33	17	2270.82
LINF_030008650	771	12	1068.83	21	1137.1
LINF_030008700	912	-	-	2	2344.5
LINF_030008800	2043	2	3363.5	-	-
LINF_030008900	5016	1	5104	5	5546.2
LINF_030009000	333	391	794.847	504	788.313
LINF_030009100	336	3068	537.443	2657	539.539
LINF_030009200	5076	1	5440	3	5465.33
LINF_030009300	3183	-	-	1	4509
LINF_030009400	276	30	1996.83	91	2000.87
LINF_030009500	2874	4	3432	18	3270.56
LINF_030009600	3030	1	4503	3	4056
LINF_030009700	3075	2	3592.5	11	3734.64
LINF_030009800	1719	-	-	5	2600.8
LINF_030010000	2574	2	2859	3	2856
LINF_030010100	6135	2	7160.5	-	-
LINF_030010200	1191	22	2561.09	42	2372
LINF_030010300	4137	1	4320	2	4297
LINF_030010400	2151	-	-	7	2852.29
LINF_030010500	999	41	1075.44	26	1294.77
LINF_030010600	537	39	1292.82	50	1315
LINF_030010700	4038	1	4597	6	4464.33
LINF_030010800	1218	56	1693.29	66	1690.85
LINF_030010900	1050	48	1399.94	92	1400.84
LINF_030011000	2028	2	3000	6	3009.67
LINF_030011200	987	160	1214.13	195	1207.24
LINF_030011300	1827	1	3002	3	2712.33
LINF_030011400	2670	-	-	7	3874.86
LINF_030011500	2397	1	3018	5	2944
LINF_030011600	1701	16	1700	24	1694.04
LINF_030011700	861	16	1791.06	23	1760.35
LINF_030012100	687	60	1134.18	126	1142.67
LINF_030012200	2640	4	3281.25	8	3193
LINF_030012300	1215	12	1982.83	16	1932.94
LINF_030012400	255	54	916.722	40	883.7
LINF_030012500	2151	4	2413.75	3	2321.67
LINF_030012600	954	40	1231.15	51	1228.94
LINF_030012700	1647	15	1830.07	34	1833.97
LINF_030012900	1308	42	1585.62	66	1537.83
LINF_030013000	7182	-	-	2	6957
LINF_030013100	3282	1	3484	2	3621
LINF_030013300	1860	13	2223.77	29	2264.76
LINF_030013400	1188	8	2875.25	15	2640.13
LINF_030013600	7113	-	-	2	7309.5
LINF_030013700	4350	-	-	4	4827
LINF_030013900	6006	-	-	2	6503.5
LINF_030014000	2220	19	2566.68	27	2760.93
LINF_030014100	1143	9	2160.89	25	2014.2
LINF_030014200	681	117	1264.7	115	1284.35
LINF_030014300	657	34	1365.15	103	1198.91
LINF_030014400	2094	12	2313.25	35	2290.57
LINF_030014500	987	70	1301.04	96	1293.16
LINF_030014600	1908	7	2465	18	2414.72
LINF_030014700	315	3942	566.652	1716	564.391
LINF_030014800	978	126	1122.92	51	1123.8
LINF_030014900	1242	60	1470.18	75	1467.24
LINF_040005000	3072	9	3629.67	14	3599
LINF_040005100	888	2	3196.5	4	2401.5
LINF_040005200	2175	14	2602.79	17	2616.94
LINF_040005300	222	852	449.547	1588	458.322
LINF_040005400	1320	13	2166.38	13	2605.38
LINF_040005500	504	391	720.084	537	763.507
LINF_040005600	1590	5	3022.8	4	3015.5
LINF_040005700	789	25	1396.08	70	1386.99
LINF_040005800	738	164	1031.75	150	1069.48
LINF_040005900	477	464	484.688	598	492.831
LINF_040006000	5619	1	6544	2	6456
LINF_040006100	1734	10	2066.3	40	2058.97
LINF_040006200	1044	50	1553.44	78	1516
LINF_040006300	903	99	1233.03	165	1298.58
LINF_040006400	477	106	994.613	157	958.382
LINF_040006500	1305	25	1433.04	64	1452.48
LINF_040006700	1587	13	2071.15	12	2071.75
LINF_040006900	1515	4	1931.25	8	1950.75
LINF_040007000	2130	3	2526.67	6	2507.5
LINF_040007100	549	13	1606.69	13	1714.46
LINF_040007200	873	1	2465	10	2662.9
LINF_040007300	1065	11	2549.09	8	2491.88
LINF_040007400	777	68	1379.37	62	1382.18
LINF_040007500	873	20	2346.05	39	2360.41
LINF_040007600	4407	-	-	5	4589.4
LINF_040007700	807	28	1046.75	50	1138.66
LINF_040007800	1443	53	1644.57	51	1646.14
LINF_040007900	5931	1	6123	1	5557
LINF_040008000	1347	19	2192.42	50	2051.54
LINF_040008100	975	44	1452.39	86	1469.67
LINF_040008200	1932	4	2921.75	10	2744.7
LINF_040008300	1200	7	2133.57	21	2093.19
LINF_040008400	2565	11	2559.82	19	2665.42
LINF_040008500	555	214	1140.25	356	1119.9
LINF_040008600	6369	-	-	3	7152.67
LINF_040008700	573	93	861.043	126	981.619
LINF_040008800	1062	87	1383.38	122	1386.37
LINF_040008900	729	17	1885.06	33	1896
LINF_040009000	1023	2	1564.5	3	1984.67
LINF_040009100	3366	-	-	7	3860.86
LINF_040009200	1086	19	2310.47	30	2281.37
LINF_040009400	4020	-	-	1	6211
LINF_040009500	2568	-	-	1	5279
LINF_040009600	1440	57	2059.51	76	2150.36
LINF_040009700	567	1829	1173.62	1841	1172.96
LINF_040009800	573	22	1371.59	53	1389.34
LINF_040009900	972	7	1547.29	14	1506.5
LINF_040010100	4743	2	5525	7	5518.43
LINF_040010200	3204	1	4530	3	3777
LINF_040010300	1044	19	1608.89	16	1975.62
LINF_040010400	1779	8	2480	11	2481.18
LINF_040010500	4653	-	-	1	4661
LINF_040010600	930	71	1222.83	86	1214.87
LINF_040010700	4707	-	-	4	5191.75
LINF_040010800	903	70	1586.3	89	1558.01
LINF_040010900	804	37	943.486	29	1038.66
LINF_040011000	9330	-	-	1	9040
LINF_040011100	504	3	1061.67	5	1084.4
LINF_040011200	3870	-	-	2	4438
LINF_040011300	1017	109	1530.24	86	1749.6
LINF_040011400	603	1586	914.434	1172	914.532
LINF_040011500	987	3	2209	8	2019.88
LINF_040011600	3726	-	-	7	4036
LINF_040011700	423	44	1203.77	206	1199.26
LINF_040011800	459	277	1238.52	288	1241.66
LINF_040011900	447	48	1315.38	43	1303.33
LINF_040012000	2169	5	2969.4	9	3046.11
LINF_040012100	3276	1	3389	3	3309.67
LINF_040012200	2385	2	3094	3	3252.67
LINF_040012300	2136	-	-	4	4364
LINF_040012400	1911	7	2060.14	22	1950.77
LINF_040012500	2433	3	2722	5	2916.2
LINF_040012600	642	1247	897.788	1229	896.201
LINF_040012800	519	483	1282.59	420	1272.32
LINF_040012900	1731	42	2064.98	49	2025.82
LINF_040013100	2016	6	2386.17	3	2462
LINF_040013200	1227	29	1574.48	107	1612.42
LINF_040013300	4191	-	-	2	4449.5
LINF_040013400	2637	10	2864.6	23	2858.22
LINF_040013500	1191	9	1892	23	1913.48
LINF_040013600	666	256	834.949	206	841.495
LINF_040013800	525	97	923.773	114	1006.94
LINF_040013900	3825	-	-	4	4249.5
LINF_040014000	5619	-	-	3	6035.67
LINF_040014100	747	60	1391.1	146	1392.79
LINF_040014200	1788	2	3579.5	3	3169.33
LINF_040014300	447	103	1136.84	81	1150.53
LINF_040014400	1482	6	2238.17	8	2364
LINF_040014500	642	1295	1047.88	1752	1045.76
LINF_040014600	630	241	976.544	133	976.263
LINF_040014700	1575	17	1950.47	30	1950.6
LINF_040014800	1116	8	1679.75	21	1808.9
LINF_040014900	3726	1	3907	3	3751.67
LINF_040015000	858	43	1281.72	39	1292.31
LINF_040015100	3537	-	-	1	3964
LINF_040015200	669	87	1043.46	118	1252.13
LINF_040015400	585	245	1639.88	122	1472.05
LINF_040015500	927	32	1783.06	40	1752.58
LINF_040015600	1071	38	1837.08	130	1755.17
LINF_040015700	1458	30	1823.67	123	1811.12
LINF_040015800	390	596	410.279	246	425.008
LINF_040015900	2631	-	-	1	3576
LINF_040016100	330	65	1111.69	148	1114.87
LINF_040016200	2874	2	3123	17	3229.82
LINF_040016300	2190	3	3019	7	2879.71
LINF_040016400	933	135	1426.87	229	1400.07
LINF_040016500	903	50	1286.3	93	1306.54
LINF_040016600	507	155	722.665	371	726.296
LINF_040016700	1056	6	2826.67	8	2805.75
LINF_040016800	1254	89	1633.13	144	1642.15
LINF_040016900	936	2	2680.5	2	2944.5
LINF_040017100	1572	67	1779.52	105	1745.48
LINF_040017200	564	37	889.946	33	940.545
LINF_040017300	1107	4	1562	9	2068.44
LINF_040017400	2994	1	3365	-	-
LINF_040017600	1131	271	1676.58	202	1679.28
LINF_050005000	2748	2	2871.5	4	2803.75
LINF_050005100	420	732	530.755	701	541.926
LINF_050005200	588	650	1139.37	371	1156.97
LINF_050005300	1746	15	2292.13	7	2231
LINF_050005400	2502	3	3173.67	9	3114
LINF_050005500	2502	2	3522	4	3177.75
LINF_050005600	276	461	575.74	196	591.801
LINF_050005700	606	200	932.74	359	949.05
LINF_050005800	540	22	1155.18	38	1165.24
LINF_050005900	1914	-	-	1	5279
LINF_050006000	372	317	751.927	329	770
LINF_050006100	1017	43	1714.3	117	1725.29
LINF_050006200	1299	5	3761.2	7	2941.14
LINF_050006400	1326	26	1673.15	30	1667.83
LINF_050006500	1542	7	1826.86	23	1816.74
LINF_050006600	2280	2	2590	7	2590
LINF_050006700	1434	10	2568.8	16	2496.75
LINF_050006800	1086	18	1477.67	30	1438.27
LINF_050006900	2361	2	2477.5	2	2450.5
LINF_050007000	4488	1	4748	5	4746.6
LINF_050007200	1902	27	2289.04	52	2273.38
LINF_050007400	294	311	624.839	114	885.991
LINF_050007500	1161	7	1469	1	1450
LINF_050007600	960	35	1238.6	22	1246.36
LINF_050007700	675	119	1482.38	76	1314.92
LINF_050007800	522	201	944.289	446	978.278
LINF_050007900	1458	93	1861	95	1895.43
LINF_050008000	2046	37	2208.95	48	2200.79
LINF_050008100	543	101	1118.55	120	1193.27
LINF_050008300	2994	1	3198	15	3215.2
LINF_050008400	1116	33	1668.12	60	1649.17
LINF_050008500	1476	99	2194.63	133	2193.66
LINF_050008600	1878	27	2021.11	73	2041.77
LINF_050008700	987	21	1908.95	19	1919.47
LINF_050008800	5199	-	-	1	5734
LINF_050009100	2763	7	2918.43	12	2933.83
LINF_050009200	336	151	841.099	48	829.458
LINF_050009300	2028	12	2370.92	8	2542
LINF_050009400	2562	4	2527	13	2545.92
LINF_050009500	591	1605	879.131	954	879.412
LINF_050009600	1884	-	-	1	2741
LINF_050009700	729	35	1197.6	93	1191.74
LINF_050009800	1725	-	-	1	2029
LINF_050009900	504	35	1180.2	39	1183.51
LINF_050010000	1725	1	2399	22	2354.64
LINF_050010100	1725	1	2370	12	2331.92
LINF_050010200	1725	25	2826.12	3	2660
LINF_050010300	1023	34	1605.68	83	1557.55
LINF_050010500	408	344	711.872	294	719.602
LINF_050010600	948	13	2027.31	42	2027.12
LINF_050010700	1260	1	3167	3	2764.33
LINF_050010800	1233	25	1628.08	37	1646.43
LINF_050010900	2340	1	4465	-	-
LINF_050011000	3021	9	3154.67	19	3142.89
LINF_050011100	2721	6	2889.67	11	2842.36
LINF_050011200	2943	3	3080.67	3	2938
LINF_050011300	2679	1	3128	8	3087.12
LINF_050011400	3678	5	4044.6	2	3951
LINF_050011500	5745	-	-	2	6088
LINF_050011600	2604	-	-	1	4386
LINF_050011700	972	61	1248.74	138	1275.8
LINF_050011900	1041	91	1342.14	74	1421.12
LINF_050012200	5178	-	-	1	6329
LINF_050012300	4203	-	-	8	4893.38
LINF_050012500	2226	3	3469.67	7	3447.57
LINF_050012600	1095	22	1874	60	1888.22
LINF_050012700	2475	5	3024.4	15	3127.67
LINF_050012800	3858	-	-	1	5697
LINF_050012900	4131	-	-	4	4475
LINF_050013000	444	87	1726.32	63	1729.03
LINF_050013100	1173	68	1410.13	116	1427.38
LINF_050013200	1332	50	1718.14	105	1707.27
LINF_050013300	492	156	942.814	278	944.331
LINF_050013400	2826	1	2942	3	2962.33
LINF_050013500	921	10	1779.4	8	1716.62
LINF_050013600	4266	-	-	4	5501
LINF_050013700	2001	2	2547.5	5	2533
LINF_050013800	468	157	774.535	89	767.809
LINF_050014000	618	34	1216.38	81	1199.1
LINF_050014100	5952	1	6577	-	-
LINF_050014200	861	22	1955	40	2039.95
LINF_050014300	3309	3	3262	32	3268.84
LINF_050014500	1398	6	1805.5	28	1860.54
LINF_050014600	3954	2	4460	4	4490
LINF_050014700	2724	5	3179.6	17	3224.35
LINF_050014800	2040	28	2315.96	34	2342.79
LINF_050015100	1113	51	1435.94	43	1448.6
LINF_050015200	1446	34	1968.06	45	2039.13
LINF_050015300	270	99	430.465	83	435.265
LINF_050015400	312	21	1489.14	30	1496.63
LINF_050015500	1845	9	2237.44	29	2237.69
LINF_050015600	2760	4	3044.5	5	2996.6
LINF_050015700	438	265	642.358	205	648.283
LINF_050015800	1074	151	1227.83	128	1237.3
LINF_050015850	1332	19	1803.21	15	1829.47
LINF_050015900	1437	26	1716.31	29	1740.86
LINF_050016000	1554	15	2189.53	10	2155.3
LINF_050016100	2181	2	2800.5	2	2788
LINF_050016200	1725	-	-	2	3582
LINF_050016300	738	233	1408.42	137	1477.53
LINF_050016400	3732	-	-	1	4369
LINF_050016500	339	97	732.423	101	605.673
LINF_050016700	1074	94	1450.5	67	1546.58
LINF_050016800	2751	1	3059	13	2888.62
LINF_050016900	495	104	593.962	70	676.243
LINF_050017000	750	70	1168.89	59	1174.37
LINF_050017100	1377	11	1872.36	23	1831.43
LINF_050017300	408	482	561.386	258	589.783
LINF_050017400	1191	27	1753.04	37	1758.86
LINF_050017500	855	18	1376	22	1479.82
LINF_050019900	1890	3	2777.33	3	2645.33
LINF_060005000	303	9735	621.74	5658	628.203
LINF_060005100	1608	-	-	8	2345.75
LINF_060005200	2028	2	2789.5	5	4389.8
LINF_060005300	876	42	1184.33	49	1420.33
LINF_060005400	1413	1	6252	7	2256.29
LINF_060005500	969	5	1857.6	14	2142.86
LINF_060005800	1974	2	3433.5	11	3247.64
LINF_060005900	1992	-	-	2	2200.5
LINF_060006000	1272	6	1637.33	29	1812.41
LINF_060006100	837	24	1758.08	38	1797.61
LINF_060006200	1806	16	2536.06	23	2545.09
LINF_060006300	564	130	1224.97	81	1240.26
LINF_060006400	561	115	1162.22	104	1140.82
LINF_060006500	744	168	1439.83	152	1447.22
LINF_060006600	330	462	587.652	604	586.864
LINF_060006700	1365	29	1886.17	51	1892.98
LINF_060006800	426	56	905.018	110	921.718
LINF_060006900	1989	7	2465.29	31	2501.19
LINF_060007000	1764	8	2698.5	18	2687.94
LINF_060007100	1494	10	2079.1	27	2015.41
LINF_060007200	237	165	766.842	235	771.677
LINF_060007400	2004	10	2388.1	19	2471.11
LINF_060007500	861	106	1153.86	90	1139.02
LINF_060007600	642	81	1031.69	130	1023.19
LINF_060007700	2544	1	3452	7	3543.57
LINF_060007800	837	12	1715.42	39	1744.67
LINF_060007900	4500	-	-	3	5977
LINF_060008000	939	54	1769.24	51	1689.59
LINF_060008100	2568	4	2740	19	2727.47
LINF_060008200	753	27	1886.41	25	2422.24
LINF_060008300	510	82	1083.38	127	1091.78
LINF_060008400	2034	7	2837.57	9	2377.22
LINF_060008500	3075	3	4521	5	3694.2
LINF_060008600	3555	2	3653	7	3670.14
LINF_060008700	2718	10	2742.7	18	2785.56
LINF_060008800	1224	55	1595.91	72	1642.61
LINF_060008900	1356	56	1380.73	62	1389.21
LINF_060009000	1140	101	1736.95	209	1725.87
LINF_060009100	1125	90	1191.74	159	1172.32
LINF_060009200	2724	14	2775.79	60	2663.47
LINF_060009300	303	14	2404	63	2388.22
LINF_060009400	738	1780	1010.03	1809	1009.89
LINF_060009500	570	103	1140.79	191	1128.21
LINF_060009600	717	1228	1096.24	1303	1104.8
LINF_060009700	1719	5	2863.2	5	2588.2
LINF_060009800	2076	2	3171	13	3219.23
LINF_060009900	2979	8	3849.5	10	3829.9
LINF_060010000	1371	16	2151.69	67	2129.22
LINF_060010100	3831	-	-	2	4305.5
LINF_060010400	978	108	1380.68	184	1384.42
LINF_060010500	1461	19	2211.42	38	2272.58
LINF_060010700	1983	7	2348.57	26	2497.77
LINF_060010800	5646	-	-	2	5819
LINF_060010900	882	45	1610.33	80	1578.91
LINF_060011000	2610	6	2736.83	24	2817.12
LINF_060011100	5250	2	5365.5	3	5291.33
LINF_060011200	807	173	1645.83	152	1642.12
LINF_060011300	438	3348	478.264	2885	483.052
LINF_060011400	438	2059	585.779	2227	588
LINF_060011500	4524	2	4754.5	9	5022.22
LINF_060011700	921	14	2455.14	36	2422.08
LINF_060011800	3033	10	3464.7	27	3397.74
LINF_060012100	3024	2	3793	7	3906.71
LINF_060012200	2040	-	-	6	2886.5
LINF_060012300	3912	1	5684	3	5444
LINF_060012400	732	70	1070.01	171	1078.12
LINF_060012500	1212	59	1449.15	57	1447.39
LINF_060012700	2220	-	-	1	3736
LINF_060012800	522	11	2440.64	43	2232.35
LINF_060012900	5289	-	-	2	5592.5
LINF_060013000	1017	7	2642.29	17	2823.29
LINF_060013100	2802	1	2840	4	2859
LINF_060013200	2007	5	2737.4	34	2658
LINF_060013300	3555	1	3869	1	3727
LINF_060013400	5982	-	-	1	7068
LINF_060013600	3225	9	4451.33	5	4076.2
LINF_060013700	4788	-	-	2	5116.5
LINF_060013900	1239	5	1740.2	10	2261.6
LINF_060014000	4170	-	-	1	4715
LINF_060014100	699	59	1400.44	100	1405.13
LINF_060014300	1563	7	2605	22	2591.77
LINF_060014400	1317	9	2150.33	55	2153.27
LINF_060014500	1251	11	2176.91	24	2237.46
LINF_060014600	2337	2	3016.5	21	3002.48
LINF_060014700	5550	-	-	2	5890.5
LINF_060014800	666	191	986.084	199	1069.29
LINF_060014900	1350	10	2580	36	2539.64
LINF_060015000	2193	5	2718.8	27	2767.19
LINF_060015100	1767	1	2297	5	2447.6
LINF_060015200	2013	4	2910.5	9	2887.11
LINF_060015300	672	73	1462.88	63	1419.9
LINF_060015400	4983	1	4994	-	-
LINF_060015500	3090	1	4293	6	3611.17
LINF_060015600	3648	6	3999.17	6	3960.5
LINF_060015700	468	174	596.368	109	597.468
LINF_060015800	1506	11	1753.73	11	1748.09
LINF_060015900	2304	6	2609.33	22	2586.41
LINF_060016000	693	76	1242.79	92	1246.63
LINF_060016100	2676	2	2790.5	4	2861.25
LINF_060016200	2175	5	2344	5	2531.2
LINF_060016300	402	250	1076.8	167	1000.34
LINF_060016400	1035	6	1863	33	2032.3
LINF_060016500	846	51	2208.75	42	2213.67
LINF_060016600	675	31	1618	34	1735.56
LINF_060016700	1788	9	2271.33	14	2268.29
LINF_060016800	909	26	1878.04	27	1922.85
LINF_060017000	822	107	1143.93	114	1184.75
LINF_060017100	990	135	1129.89	47	1137.3
LINF_060017200	2259	13	2217.77	8	2202.62
LINF_060017300	1566	54	1629.09	65	1647.74
LINF_060017400	3282	6	3319.83	18	3286.61
LINF_060017500	408	263	985.951	892	979.565
LINF_060017600	1368	40	1857.42	103	1819.47
LINF_060017700	444	700	640.526	555	640.542
LINF_060017800	342	2	1160	2	1624.5
LINF_060017900	261	1	1741	2	1624.5
LINF_060018000	1185	13	1528.08	14	1528.86
LINF_060018100	1767	10	2792.1	29	2645.59
LINF_060018200	2376	2	3173.5	10	2771.3
LINF_060018300	882	63	1091.22	90	1108.93
LINF_060018400	1485	13	2144.31	28	2159.25
LINF_060018500	294	544	446	518	446.251
LINF_060018600	717	108	1148.81	173	1152.24
LINF_060018700	525	525	847.716	520	851.812
LINF_060018800	1962	68	2453.87	125	2454.82
LINF_060018900	906	256	1913.42	233	1952.58
LINF_060019000	696	103	1374.07	95	1395.08
LINF_060019100	372	220	1158.87	38	1163.11
LINF_060019200	1929	31	2907.32	92	3205.3
LINF_070005000	2178	5	2316.4	10	2288.9
LINF_070005100	810	173	867.792	276	880.688
LINF_070005200	900	112	1192.65	66	1194.14
LINF_070005300	687	49	1841	24	1821.04
LINF_070005400	945	39	1084.87	15	1065.8
LINF_070005500	2886	1	3957	3	3930.67
LINF_070005600	777	206	1285.15	224	1338.18
LINF_070005700	579	408	818.833	279	846.226
LINF_070005800	1875	5	3259.2	11	2863.36
LINF_070005900	3759	7	4751.14	9	4678.33
LINF_070006000	3099	11	3275.73	23	3295.74
LINF_070006100	1038	28	1889.43	33	1904.76
LINF_070006200	6678	-	-	2	6935
LINF_070006300	1842	9	1859.67	11	1832.45
LINF_070006400	1059	87	1421.43	130	1428.78
LINF_070006500	1854	-	-	2	2344
LINF_070006600	405	5	1274.6	17	1274.94
LINF_070006700	2547	10	2779.8	21	2809.95
LINF_070006800	360	1	4234	2	3135
LINF_070006900	3195	-	-	1	3387
LINF_070007100	1182	64	1495.95	55	1490.09
LINF_070007200	2268	9	2888	20	2849.8
LINF_070007300	762	92	814.022	135	818.659
LINF_070007400	1908	22	2423.86	17	2430.24
LINF_070007500	360	511	522.967	1113	495.907
LINF_070007600	1824	15	2107.47	30	2022.23
LINF_070007700	5598	-	-	1	5687
LINF_070007800	1101	26	1812.31	82	1894.1
LINF_070007900	1194	23	2096.39	47	1571.06
LINF_070008100	765	106	1558.24	97	1549.53
LINF_070008200	2553	-	-	4	3247.75
LINF_070008300	2430	17	3069	13	3040
LINF_070008400	3138	6	3837.33	2	3898.5
LINF_070008500	2508	4	3114	13	3147.69
LINF_070008600	2346	13	2666.08	34	2613.62
LINF_070008800	1458	21	2424.14	15	2440.6
LINF_070008900	1971	18	2432.61	31	2442.06
LINF_070009000	324	94	972.979	138	993.913
LINF_070009100	2769	-	-	1	3631
LINF_070009200	10824	-	-	1	10362
LINF_070009300	2787	4	2933.5	25	2900.64
LINF_070009400	1833	1	2690	5	2766.2
LINF_070009500	1539	3	2816.67	20	2634.8
LINF_070009600	330	412	799.08	430	781.758
LINF_070009700	474	335	959.188	179	962.006
LINF_070009800	474	94	955.191	105	940.933
LINF_070009900	501	446	583.186	447	591.893
LINF_070010000	1560	32	1942.75	21	1857.71
LINF_070010200	480	412	562.034	191	683.77
LINF_070010400	1197	-	-	1	3316
LINF_070010500	795	1403	1036.65	1603	1040.56
LINF_070010600	795	1085	1093.86	1142	1097.67
LINF_070010700	711	32	1868.03	37	1911.89
LINF_070010800	1095	1	2829	2	3118.5
LINF_070010900	2976	-	-	4	3378.25
LINF_070011100	678	43	1776.09	98	1672.46
LINF_070011200	1401	17	1882.65	30	1937.27
LINF_070011300	4107	2	4186	2	4370.5
LINF_070011500	1728	5	2742.2	13	2639.92
LINF_070011600	588	62	992.823	72	1007.89
LINF_070011700	753	245	998.58	280	1013.52
LINF_070011800	1911	3	2511.33	5	2684
LINF_070011900	3315	-	-	3	4335.67
LINF_070012000	1008	103	1581.21	129	1582.08
LINF_070012100	3360	-	-	2	5034.5
LINF_070012200	1560	30	2081.5	30	2071.77
LINF_070012300	507	56	1152.59	100	1158.89
LINF_070012400	573	1114	1075.28	1231	1073.51
LINF_070012500	4983	-	-	3	6706.67
LINF_070012600	2754	10	3116.9	22	3061.82
LINF_070012700	564	64	1191.95	91	1246.1
LINF_070012800	1746	5	3236.4	6	3241.5
LINF_070012900	3786	6	4036.17	10	4025.2
LINF_070013000	2388	2	3846	6	2709
LINF_070013200	453	18	1536.5	45	1666.24
LINF_070013300	381	3	3007.67	23	2435.7
LINF_070013400	882	30	1590.2	77	1684.23
LINF_070013500	3714	-	-	1	4490
LINF_070013600	1254	1	4085	7	3896.29
LINF_070013700	915	15	2115.8	32	2199.91
LINF_070013800	873	23	1487.52	33	1681.42
LINF_070013900	2016	4	2936.5	7	3029.29
LINF_070014100	1059	16	1373.12	24	1364.88
LINF_070014200	1794	8	2348.5	28	2338.07
LINF_070014300	81	123	1127.44	159	1157.75
LINF_070014700	549	175	1070.7	219	1089.49
LINF_070014800	4428	-	-	2	4576.5
LINF_070014900	1128	3	2629	2	2418.5
LINF_070015000	4071	-	-	3	4517.67
LINF_070015100	1908	-	-	1	6040
LINF_070015200	891	7	1697.71	5	1925
LINF_070015300	5484	1	5590	5	5801.8
LINF_070015400	1014	46	1283.59	73	1402.27
LINF_070015600	1014	44	1786.16	66	1823.27
LINF_070015700	7347	1	7972	2	7690
LINF_070015900	3405	-	-	1	4285
LINF_070016000	2640	2	3076.5	12	3124.42
LINF_070016100	357	163	877.926	150	890.127
LINF_070016300	1095	1	2146	5	2062.8
LINF_070016400	489	160	822.769	137	829.015
LINF_070016500	3660	1	4553	1	4633
LINF_070016600	348	108	1132.62	198	1201.64
LINF_070016700	1125	51	1325.1	128	1430.22
LINF_070016800	612	163	807.153	177	824.983
LINF_070016900	975	58	1732.72	148	1724.55
LINF_070017000	3735	-	-	1	4892
LINF_070017100	351	482	822.583	408	853.404
LINF_070017200	1545	40	1594.05	79	1567.53
LINF_070017300	1353	10	1959	22	1913.95
LINF_070017400	2520	-	-	4	3440.75
LINF_070017500	1254	16	2184.25	42	2190.1
LINF_070017600	915	79	1135.35	197	1153.6
LINF_070017700	312	367	495.597	652	523.502
LINF_070017800	321	295	1116.06	219	1086.21
LINF_070017900	1089	31	1935.81	29	2031.66
LINF_070018000	1038	157	1491.37	108	1497.64
LINF_070018100	1731	37	1959.19	43	2171.37
LINF_070018200	531	19	1806.11	59	1880.78
LINF_070018300	7629	1	7603	2	7401
LINF_070018400	1476	4	3569	29	3503.93
LINF_080005100	822	70	1314.67	69	1346.46
LINF_080005200	648	85	1832.92	51	1822.06
LINF_080005300	690	260	1296.65	200	1304.73
LINF_080005400	228	320	750.084	156	788.603
LINF_080005500	558	237	724.502	247	744.721
LINF_080005600	1890	19	2192.68	18	2204.06
LINF_080005700	2058	6	3032.83	13	2993.23
LINF_080005800	3402	7	3888.86	7	3941.57
LINF_080005900	1356	23	2088.13	23	2035.26
LINF_080006000	1932	2	3276	7	2855.71
LINF_080006100	813	205	1161.47	227	1158.43
LINF_080006200	3453	-	-	3	5054
LINF_080006300	1758	69	1890.13	98	1900.39
LINF_080006400	3783	5	3858.4	9	3857.56
LINF_080006500	1563	12	2408.75	24	2356.83
LINF_080006600	702	517	1109.04	997	1108.73
LINF_080006800	885	82	1465.43	79	1513.82
LINF_080006900	2793	-	-	3	3494
LINF_080007000	1962	3	3288	5	2973.4
LINF_080007100	1503	3	1773	16	1849.69
LINF_080007200	3288	5	3467	7	3405.29
LINF_080007300	1569	14	2386.57	23	2423.91
LINF_080007400	789	56	1283.73	64	1324.55
LINF_080007500	354	17	882.412	22	923.273
LINF_080007600	1317	15	2345.27	27	2338.96
LINF_080007700	2502	1	3199	4	4512.75
LINF_080007800	1143	10	1797.2	29	1793.24
LINF_080007900	693	59	1586.27	58	1607.16
LINF_080008000	759	35	1335.29	35	1476.46
LINF_080008100	780	100	1062.9	65	1145.31
LINF_080008200	678	31	1264.97	64	1258.22
LINF_080008300	288	416	505.812	300	504.35
LINF_080008700	1731	9	2378.44	12	2449.08
LINF_080008800	663	60	1507.32	72	1496.74
LINF_080008900	5733	1	5862	-	-
LINF_080009000	5661	1	6351	-	-
LINF_080009100	3558	1	4525	5	4356.8
LINF_080009300	5619	-	-	2	6431
LINF_080009400	2778	1	3316	2	3373.5
LINF_080009600	543	140	967.65	166	994.235
LINF_080009700	876	3	2692.67	13	2718.92
LINF_080009800	354	12	1777.5	19	1648.89
LINF_080009900	849	46	1350.09	110	1320.57
LINF_080010000	1173	35	1855.34	42	1809.62
LINF_080010100	1089	36	1344.56	34	1321.47
LINF_080010200	2523	2	3234.5	6	3273.83
LINF_080010300	6987	-	-	1	7202
LINF_080010500	1059	63	1763.46	202	1728.51
LINF_080010600	1467	1	3302	4	2881.25
LINF_080010700	1038	6	2130.67	9	2113.89
LINF_080010800	714	124	1091.28	323	1086.47
LINF_080010900	540	2	2188	9	1425.67
LINF_080011000	501	2	2368.5	2	2336
LINF_080011300	432	20	1708.65	23	1708.04
LINF_080011600	903	11	2856.18	14	2945.43
LINF_080011700	891	10	2376.2	47	1974.87
LINF_080011800	4080	-	-	3	4294.67
LINF_080011900	615	13	1897.69	368	2029.05
LINF_080012000	606	10	2026.2	91	2178.75
LINF_080012100	603	11	2212.55	105	2194.74
LINF_080012200	603	1	4008	-	-
LINF_080012400	612	7	1861.57	206	2033.49
LINF_080012500	1530	8	2245.88	20	2326.6
LINF_080012600	1908	8	2431.12	19	2510.74
LINF_080012700	1029	33	2055.94	49	2102.39
LINF_080012800	582	1	2473	4	2424.75
LINF_080012900	528	2	2361	6	2208.83
LINF_080012950	582	-	-	10	2214.8
LINF_080013000	873	13	1888.69	54	1957.06
LINF_080013100	1260	4	2262.25	24	2338
LINF_080013300	1131	6	2213.5	4	2080
LINF_080013400	1992	-	-	1	5766
LINF_080013600	615	75	1012.51	118	1064.77
LINF_080013700	354	80	1348.42	122	1353.8
LINF_080013800	3462	-	-	13	4119.46
LINF_080013900	804	114	1117.94	171	1125.2
LINF_080014000	441	220	861.345	282	865.564
LINF_080014100	1698	-	-	3	2448.67
LINF_080014200	2502	1	3900	9	3795
LINF_080014500	981	21	1569.62	37	1565.24
LINF_080014600	1944	-	-	1	7388
LINF_080014700	1146	24	1725.83	54	1728.59
LINF_080014800	1332	1	2143	1	2054
LINF_080015000	597	1	1285	1	1285
LINF_080015100	1332	24	1948.42	37	1938.78
LINF_080015200	1332	18	1891.78	30	1983.53
LINF_080015500	1332	50	1963.86	81	2038.4
LINF_080015700	1092	5	2139.8	12	2241.17
LINF_080015800	1098	577	1456.09	483	1455.35
LINF_080016000	1641	22	2628.36	27	2589.78
LINF_080016100	2619	4	3121	6	2852
LINF_080016200	1116	44	1962.61	84	1925.38
LINF_080016300	2841	-	-	6	3255.17
LINF_080016400	3435	2	3872.5	5	3824.2
LINF_080016500	1281	58	1695.02	102	1688.89
LINF_080016600	1329	18	2156.06	30	2149.23
LINF_080016700	1254	23	1436.91	73	1441.64
LINF_080016800	3744	9	4180.89	13	4235.92
LINF_080016900	588	59	1111.85	77	1285.05
LINF_080017000	1185	29	1607.72	89	1658.76
LINF_080017100	1521	23	2650.74	70	2620.86
LINF_080017200	1422	7	2103	31	2273.52
LINF_080017300	300	803	1211.65	397	1193.37
LINF_080017400	1266	67	1453.16	118	1451.68
LINF_080017500	861	16	1713.94	108	1917.17
LINF_080017600	2565	3	3920	17	3677.88
LINF_080017700	1332	211	1984.26	290	1980.22
LINF_090005000	435	248	630.681	123	630.211
LINF_090005100	1122	114	1263.76	98	1310.37
LINF_090005200	324	2038	556.74	1133	569.306
LINF_090005300	1860	26	1966.54	45	1934.96
LINF_090005400	963	62	1149.03	59	1113.17
LINF_090005500	750	164	1363.42	142	1538.18
LINF_090005600	777	203	1060.32	174	1104.74
LINF_090005700	396	243	1508.72	444	1543.63
LINF_090005800	3705	4	4099.25	11	4179.55
LINF_090005900	738	-	-	3	2088.33
LINF_090006000	900	-	-	1	1362
LINF_090006100	1749	2	3088	3	3214.33
LINF_090006200	666	19	1385.95	17	1387.94
LINF_090006300	2136	25	2572.08	44	2605.14
LINF_090006400	3255	1	4411	9	4324.67
LINF_090006500	1575	12	2040.67	30	2052.97
LINF_090006600	375	28	1072.64	43	1075.4
LINF_090006700	405	-	-	1	1321
LINF_090006800	375	29	1025	46	1046
LINF_090007000	375	23	1044.91	47	1031.26
LINF_090007100	375	11	983.727	25	995.84
LINF_090007200	405	55	948.109	33	914.848
LINF_090007300	375	32	1044	46	1045.46
LINF_090007400	369	28	892.857	70	896.529
LINF_090007500	363	90	1148.91	175	1136.2
LINF_090007600	1512	44	1574.3	51	1613.55
LINF_090007700	918	43	1693.98	52	1633.13
LINF_090007800	2442	12	2843.08	24	2804.79
LINF_090007900	1512	37	1928.22	39	2077.15
LINF_090008000	2850	3	3758.67	4	3910.5
LINF_090008100	2688	5	3048.4	2	3016.5
LINF_090008200	819	100	960.3	98	1000.3
LINF_090008300	1866	1	2340	20	2377.2
LINF_090008400	2352	18	2522.94	39	2692.18
LINF_090008600	711	105	994.495	64	988.844
LINF_090008700	2646	4	3200.5	7	3241.29
LINF_090008800	2760	-	-	8	3986.5
LINF_090008900	2550	-	-	4	4559
LINF_090009000	3198	-	-	10	3838.8
LINF_090009100	756	95	818.337	100	820.66
LINF_090009200	2628	1	3118	10	3053.3
LINF_090009300	2799	3	3438.67	6	3462.33
LINF_090009400	633	89	1050.45	64	1024.78
LINF_090009500	264	104	1048.19	73	1065.52
LINF_090009600	528	48	1278.35	85	1298.35
LINF_090009700	1389	19	1652.26	49	1827.02
LINF_090009800	5895	-	-	1	6082
LINF_090009900	1278	1	2809	7	2483.71
LINF_090010000	1434	5	2197.4	10	2307.5
LINF_090010100	3015	2	4193	1	4350
LINF_090010200	1404	9	2511.89	15	2679.27
LINF_090010300	1707	16	2068.88	11	2023.91
LINF_090010400	2805	1	3453	3	3467.67
LINF_090010600	1959	6	3058.5	45	2788.76
LINF_090010700	2235	-	-	6	3110.33
LINF_090010800	1236	57	1440.51	69	1440.58
LINF_090010900	4518	-	-	2	5315.5
LINF_090011000	1215	38	1803.5	75	1784.67
LINF_090011100	2313	-	-	5	3715.6
LINF_090011200	2994	3	4149.33	8	4029.88
LINF_090011300	3330	-	-	3	4128.33
LINF_090011400	1758	44	2218.45	62	2139.77
LINF_090011500	789	14	1466.79	17	1411.18
LINF_090011600	1470	5	2632.6	12	2809.58
LINF_090011700	858	3	2874	7	2507
LINF_090011800	2991	3	3961.67	4	3898.25
LINF_090011900	1008	132	1557.52	158	1564.67
LINF_090012000	2514	17	3241.47	27	3250.37
LINF_090012100	1971	8	2476.5	23	2490.61
LINF_090012200	3480	1	4463	3	4367.33
LINF_090012300	1503	38	1968	121	1855.81
LINF_090012400	1914	2	2159	15	2291.33
LINF_090012500	1059	152	1182.22	188	1215.61
LINF_090012600	417	200	741.365	102	760.265
LINF_090012700	1113	168	1113.48	197	1116.5
LINF_090012800	921	1	1649	-	-
LINF_090013200	1548	10	2776.8	16	2780.69
LINF_090013300	1551	6	2340.83	19	2317.26
LINF_090013400	1011	62	1484.98	106	1489.62
LINF_090013500	1896	17	1928.71	36	1952.17
LINF_090013700	2997	3	3281	13	3313.85
LINF_090013900	2196	7	3133.14	21	3029.62
LINF_090014000	792	-	-	2	2890
LINF_090014100	3744	4	4114.75	6	3661.17
LINF_090014200	3873	-	-	2	4529
LINF_090014300	645	163	709.706	193	707.181
LINF_090014400	1593	50	1716.66	99	1703.38
LINF_090014500	2331	7	2707.29	11	2774.36
LINF_090014600	1197	165	1357.54	141	1368.94
LINF_090014700	810	59	1035.2	56	1035.8
LINF_090014800	321	353	884.399	265	852.917
LINF_090014900	1572	16	2153.19	8	2154.12
LINF_090015000	1473	8	2702.75	16	2412.75
LINF_090015200	387	323	858.907	260	846.896
LINF_090015300	561	191	978.555	119	1033.97
LINF_090015400	450	427	1222.01	134	1229.5
LINF_090015500	450	518	1267.77	192	1242.32
LINF_090015600	450	629	862.776	183	1040.92
LINF_090015700	3687	1	3720	1	4263
LINF_090015800	1788	44	1783.34	71	1794.65
LINF_090015900	1851	22	2400.45	39	2378.97
LINF_090016000	1215	52	2142.25	80	2114.61
LINF_090016050	1218	24	1914.5	36	1874.44
LINF_090016100	2988	2	4739.5	-	-
LINF_090016300	939	116	921.207	118	928.669
LINF_090016800	762	65	1048.66	131	1090.89
LINF_090016900	1848	2	1899	7	2182.71
LINF_090017000	270	20	1419.25	31	1376.71
LINF_090017600	1788	15	2764.13	31	2733.42
LINF_090017700	942	29	1302.59	35	1436.11
LINF_090017800	2061	1	4053	6	3894.33
LINF_090017900	753	6	2462.67	9	2392.67
LINF_090018000	894	98	1407.26	214	1422.58
LINF_090018100	1440	12	2363.83	14	2382.71
LINF_090018200	1806	8	2317	14	2331.36
LINF_090018300	768	28	1725.14	52	1766.37
LINF_090018400	1377	1	1817	9	3153.78
LINF_090018500	729	209	1204.31	226	1199.97
LINF_090018600	459	283	804.332	232	876.935
LINF_090018800	858	84	1310.32	70	1303.41
LINF_090018900	2220	19	2595.63	27	2677.11
LINF_090019000	591	52	1367.6	55	1368.67
LINF_090019100	3024	-	-	4	4295
LINF_090019200	1797	3	2563.33	11	2912.18
LINF_090019400	1263	46	1948.78	68	1951.25
LINF_090019500	3867	1	4802	4	4725.25
LINF_090019600	1326	64	1325.38	95	1343.52
LINF_090019800	6306	1	6613	-	-
LINF_090019900	555	180	916.672	143	1047.55
LINF_090020000	1959	10	2443.9	24	2436.75
LINF_090020100	1029	69	1516.17	121	1457.74
LINF_090020200	1104	10	1808.7	27	1712.04
LINF_090020300	1731	17	2284.65	43	2220.67
LINF_090020400	657	63	1084.46	82	1112.02
LINF_090020500	765	5	2073.8	11	2232.64
LINF_090020600	1053	158	1403.47	228	1422.01
LINF_090020700	1818	6	2877.67	5	2995
LINF_090020800	1824	6	2949.33	20	2915
LINF_090020900	336	2268	827.919	1026	822.109
LINF_090021000	579	40	1334.67	73	1341.88
LINF_090021100	387	43	2006.28	85	1987.05
LINF_090021200	807	31	1484.65	47	1487.04
LINF_090021300	1743	2	3006.5	6	2904.17
LINF_090021400	1986	3	2973.33	8	3487.75
LINF_090021600	1722	10	2421.7	8	2907.62
LINF_090021700	420	133	846	135	891.222
LINF_090021800	564	80	1197.97	87	1177.8
LINF_090021900	471	16	2240.44	36	2291.39
LINF_090022000	1242	41	1780.98	91	1807.12
LINF_090022100	396	234	871.41	175	876.417
LINF_090022200	453	626	752.101	452	755.912
LINF_090022300	360	513	753.986	423	767.851
LINF_090022400	2445	14	3416.29	19	3428
LINF_090022500	354	590	917.232	448	998.201
LINF_090022600	420	133	862.707	142	870.366
LINF_090022700	366	493	593.704	358	593.919
LINF_090022800	4635	1	5187	-	-
LINF_090022900	1017	182	1073.93	207	1076.3
LINF_090023000	486	446	715.305	114	729.965
LINF_090023100	1824	1	2145	1	2053
LINF_090023200	546	286	733.748	201	738.02
LINF_100005000	1185	6	3025.5	31	2191.52
LINF_100005100	1980	3	3551.33	5	3488.8
LINF_100005200	1482	12	2721.92	34	2737.53
LINF_100005300	2814	11	3211.09	13	3265.08
LINF_100005400	2760	5	3103.8	7	3100.71
LINF_100005500	1092	8	2453.88	9	2500.44
LINF_100005600	435	11756	476.504	6510	476.468
LINF_100005700	1032	63	1696.51	104	1568.7
LINF_100005800	1239	89	2006.72	142	1992.94
LINF_100005900	774	26	1239.85	50	1193.84
LINF_100006000	1188	136	1265.38	156	1264.15
LINF_100006100	1089	-	-	1	3169
LINF_100006200	2214	4	3534.75	7	3507.14
LINF_100006300	2343	12	2849.75	37	2963.41
LINF_100006400	1110	3	3913	13	3610.08
LINF_100006500	1518	1	3572	14	3586.57
LINF_100006600	2034	12	2693.83	20	2815
LINF_100006700	717	13	2265	6	2139.5
LINF_100006900	2007	3	2231.67	15	2203.2
LINF_100007000	666	197	1302.37	193	1319.05
LINF_100007100	1224	-	-	4	2488.5
LINF_100007200	273	11	2134.45	36	2263.75
LINF_100007300	1422	57	1913.6	119	1892.32
LINF_100007400	2148	24	2211.92	42	2199.29
LINF_100007500	837	16	1451.19	13	2052.77
LINF_100007600	1473	-	-	2	2766.5
LINF_100007700	1257	3	2433.67	26	2562.38
LINF_100007800	2211	4	2891.5	24	2727.04
LINF_100007900	780	140	1040.75	292	1068.98
LINF_100008000	390	128	1441.51	105	1352.5
LINF_100008100	2790	10	3358.6	24	3351.42
LINF_100008200	7047	-	-	1	7028
LINF_100008300	1308	44	2298.89	59	2322.22
LINF_100008400	2298	-	-	2	3234
LINF_100008500	2412	2	3754.5	10	4038.7
LINF_100008600	5874	1	7228	-	-
LINF_100008700	1308	22	2302.64	45	2208
LINF_100008800	2238	1	2398	6	2883.17
LINF_100009000	1788	-	-	1	5276
LINF_100009300	2115	2	2608.5	7	2488.29
LINF_100009400	2097	-	-	7	3410.43
LINF_100009500	2169	1	3570	4	3453.5
LINF_100009600	1770	5	2335	5	3023.2
LINF_100009700	1908	11	2530.91	26	2547.54
LINF_100009800	486	14	1659.29	53	1746.23
LINF_100009900	498	19	1445.32	22	1482.86
LINF_100010000	252	222	608.176	222	612.108
LINF_100010100	1797	1	2837	33	2522.82
LINF_100010150	885	15	1837	31	1933.94
LINF_100010200	1800	8	2439.12	4	2509.25
LINF_100010300	1800	47	2450.43	30	2429.4
LINF_100010500	456	-	-	2	1203.5
LINF_100010600	1800	14	2469.64	9	2426.11
LINF_100010700	1800	5	2422.2	12	2439.92
LINF_100010800	1800	43	2444.7	23	2412.26
LINF_100011100	1800	15	2458.53	9	2387.78
LINF_100011200	1926	10	2214	27	2443.19
LINF_100011300	1800	6	2356	31	2477.29
LINF_100011350	891	1	4898	2	3227
LINF_100011400	381	1	927	2	995
LINF_100011600	1167	6	2479.17	21	2243.57
LINF_100011800	1104	35	2429.43	63	2400.21
LINF_100012000	2721	6	2970.67	14	2988.29
LINF_100012100	3468	-	-	3	3675
LINF_100012200	3270	4	3821	10	3687.1
LINF_100012300	1296	42	1445.33	77	1459.86
LINF_100012400	1116	102	1434.8	86	1443.81
LINF_100012500	1437	16	1935.69	23	1975.3
LINF_100012600	2313	3	2413.67	8	2400.62
LINF_100012700	804	570	817.874	404	819.045
LINF_100012800	1788	26	1756.31	38	1782.79
LINF_100012900	1524	43	1699.14	109	1709.39
LINF_100013000	2271	2	3626	5	3593.8
LINF_100013100	1782	1	3070	4	2934.25
LINF_100013200	732	76	1332.33	159	1332.97
LINF_100013300	1128	16	1859.88	79	1900.18
LINF_100013500	975	12	1893.08	27	1901.89
LINF_100013600	1518	15	2463.13	29	2429.14
LINF_100013700	5028	-	-	1	4915
LINF_100013800	2865	1	2848	7	2854.57
LINF_100013850	1467	2	2717.5	-	-
LINF_100013900	1467	57	2612.58	40	2510.43
LINF_100014000	846	37	1034.97	127	1125.99
LINF_100014100	378	47	1904.53	54	1835.35
LINF_100014300	1926	4	2056	14	2655.64
LINF_100014400	1656	20	2395	25	2653.36
LINF_100014500	1260	2	2994	3	3048.67
LINF_100014600	666	57	1115.09	57	1111.61
LINF_100014700	3243	-	-	1	4432
LINF_100014900	1203	28	1808.25	48	1824.48
LINF_100015100	2199	9	2701.22	10	2711.2
LINF_100015200	375	317	858.297	249	857.518
LINF_100015300	591	33	1101.91	35	1156.46
LINF_100015400	393	723	769.303	126	766.087
LINF_100015500	3501	1	3736	3	3676.33
LINF_100015600	480	84	889.202	42	875.976
LINF_100015700	4725	4	4965.25	4	4952
LINF_100015800	627	27	1817.15	30	1797.4
LINF_100015900	600	20	2091.45	33	2088.67
LINF_100016300	1188	-	-	1	1341
LINF_100016500	324	86	1034.98	67	1047.45
LINF_100016600	1602	17	1987.35	27	2008.44
LINF_100016700	2421	4	3645.25	8	3610.25
LINF_100016800	393	102	1065.75	51	1056.45
LINF_100016900	1851	3	2994	17	2850.53
LINF_100017000	393	3980	1042.65	946	1050.6
LINF_100017100	1203	20	1297.4	60	1342.28
LINF_100017200	1026	8	1813.62	22	1837.86
LINF_100017300	1188	6	2517.83	16	2613.88
LINF_100017400	1149	10	1613.6	17	1737.94
LINF_100017500	3672	6	4253.33	4	4214
LINF_100017600	828	222	890.527	628	895.602
LINF_100017700	969	16	1227.12	12	1159.92
LINF_100017800	1779	4	2061	10	2052.9
LINF_100018000	1512	41	1606.39	44	1610.7
LINF_100018100	534	51	1438.29	58	1476.45
LINF_100018200	1275	8	1935.75	12	2008.67
LINF_100018300	318	193	809.01	323	820.988
LINF_100018400	1572	11	2441.91	19	2390.74
LINF_100018500	420	152	919.822	209	919.526
LINF_100018600	4584	-	-	3	5824.67
LINF_100018700	1083	16	1793.44	53	1594.77
LINF_100018800	1443	25	1809.72	12	1787.17
LINF_100018900	651	14	2516.29	17	2530.94
LINF_100019000	669	8	2295.12	18	2138.94
LINF_100019100	423	21	1481.19	32	1490.88
LINF_100019200	1194	10	2439.8	17	2516.59
LINF_100019300	570	50	1356.96	107	1342.03
LINF_100019400	3189	8	3651.25	8	3565.12
LINF_100019500	1704	10	1937	18	2062.39
LINF_100019600	921	51	1616.76	68	1524.41
LINF_100019700	402	617	591.313	671	618.999
LINF_100019800	738	35	926.514	65	1258.6
LINF_100020200	741	55	746.709	67	747.343
LINF_100020300	987	6	2030.17	5	2414.2
LINF_100020400	966	8	1863	13	1961.46
LINF_100020500	957	5	3000.6	11	2538.36
LINF_100020600	948	35	1247.77	21	1362.71
LINF_100020700	942	19	1306.53	33	1283.52
LINF_100020800	951	7	2382.29	14	2579.21
LINF_100020900	936	10	2068	17	1996
LINF_100021000	1482	12	2784	38	2823.26
LINF_100021100	1980	3	2432.67	7	3254.14
LINF_100021200	1056	1	3009	6	2678.17
LINF_110005000	513	30	899.067	31	904.226
LINF_110005100	1107	147	1206.27	139	1225.61
LINF_110005200	924	112	1317.62	86	1330.49
LINF_110005300	906	115	1151.96	155	1162.59
LINF_110005400	2877	13	3057	52	2961.29
LINF_110005500	3372	1	4272	12	4110.17
LINF_110005700	678	120	949.85	157	965.745
LINF_110005800	1581	9	2401.78	22	2461.18
LINF_110005900	1425	64	2319.31	67	2270.9
LINF_110006000	1194	71	1385.18	167	1381.87
LINF_110006100	570	13	1849.54	43	1414.19
LINF_110006200	840	85	1258.33	104	1224.4
LINF_110006300	879	33	1491.67	39	1497.18
LINF_110006400	2643	3	4060.67	2	3184.5
LINF_110006500	3084	7	3245.43	15	3269.93
LINF_110006600	2154	3	2293.33	19	2268.95
LINF_110006700	591	72	1000.94	32	1013.09
LINF_110006800	1830	13	2074	54	2103.39
LINF_110006900	555	164	775.183	242	785.07
LINF_110007000	1332	19	2324.68	36	2141.56
LINF_110007100	336	714	431.293	320	630.331
LINF_110007200	1557	29	1871.45	89	1857.48
LINF_110007300	744	185	1369.86	153	1391.47
LINF_110007400	2997	-	-	4	4095.25
LINF_110007500	1785	24	2493.38	51	2460.78
LINF_110007600	1038	4	2885.5	7	2874
LINF_110007700	477	5	2780.6	6	2750.83
LINF_110007800	1392	33	2199.88	64	2192.94
LINF_110007900	825	111	947.297	228	950.917
LINF_110008000	5418	-	-	2	6306
LINF_110008100	3672	1	4568	-	-
LINF_110008300	1413	12	1700.17	51	1735.06
LINF_110008400	762	30	2048.9	22	1952.77
LINF_110008500	1197	30	1914.03	76	1878.83
LINF_110008600	1857	-	-	12	3133.25
LINF_110008700	3378	2	4233.5	1	4441
LINF_110008800	1530	7	2620.57	26	2557.73
LINF_110009000	2427	1	3223	4	2761.75
LINF_110009100	2328	10	2736.6	13	2841.69
LINF_110009200	1932	7	2637.14	36	2676.31
LINF_110009300	1743	8	2391.62	7	2407.71
LINF_110009400	2241	14	2308.21	24	2358.25
LINF_110009500	1932	38	1993	51	2012.08
LINF_110009600	2232	21	2377.71	29	2362.31
LINF_110009700	1647	-	-	3	2460
LINF_110010500	3183	4	3463	6	3490.17
LINF_110010600	1224	58	1422.91	68	1416.6
LINF_110010700	399	255	755.773	353	759.533
LINF_110010800	1737	1	2649	7	2684.57
LINF_110010900	1401	15	2400.67	36	2214.58
LINF_110011000	2163	8	2217.62	16	2332.69
LINF_110011100	1944	31	2378.97	61	2426.95
LINF_110011200	1653	1	3194	3	3285
LINF_110011300	3249	2	3600	4	4970
LINF_110011500	429	3	1760.33	5	2120.6
LINF_110011600	1611	14	2974.43	22	2990.73
LINF_110011700	1797	20	2267.45	53	2289.92
LINF_110011900	855	4	2301.5	15	2174.27
LINF_110012000	1608	1	2692	5	2736
LINF_110012200	1926	-	-	1	4048
LINF_110012300	2100	8	3225.38	23	3068.65
LINF_110012500	1758	6	2561	19	2333.84
LINF_110012600	681	20	1856.9	49	2003.55
LINF_110012700	1230	49	1868.14	68	1901.03
LINF_110012800	1413	2	2787.5	13	2684.85
LINF_110012900	1962	2	4658.5	5	4882
LINF_110013000	3804	2	4357	6	4551.67
LINF_110013100	1335	10	2360.1	23	2323.48
LINF_110013200	618	22	1634.77	87	1703.38
LINF_110013300	495	2406	1085.41	2139	1077.13
LINF_110013400	519	76	2196.37	106	2217.01
LINF_110013500	771	62	1601.58	118	1646.75
LINF_110013600	444	531	565.073	477	583.042
LINF_110013700	2928	8	3876.75	5	3750.2
LINF_110013800	1014	1	2508	2	3471
LINF_110014000	618	24	2037.67	55	1973.27
LINF_110014100	1419	22	2145.09	71	2213.28
LINF_110014400	975	59	1699.97	84	1759.38
LINF_110014500	1212	30	2168.87	40	2128.5
LINF_110014600	3015	5	3649.6	8	3684.62
LINF_110014700	573	65	1314.95	100	1302.56
LINF_110014900	1776	10	2330	9	2347
LINF_110015300	1134	27	1831.37	74	1826.15
LINF_110015400	2121	-	-	1	5402
LINF_110015500	1242	2	3027.5	11	2350.55
LINF_110015600	573	2139	1064.57	1722	1067.6
LINF_110015700	573	4232	972.254	3699	972.762
LINF_110015800	1455	25	2123.36	73	2131.99
LINF_110015900	2976	2	4298.5	1	4062
LINF_110016000	2745	2	3846	4	4021.5
LINF_110016100	2067	15	2614.87	23	2663.35
LINF_110016200	3507	-	-	2	5439
LINF_110016300	807	36	1835.56	71	1484.99
LINF_110016500	1461	2	2394	8	2581.12
LINF_110017000	1563	2	3263.5	8	3546.25
LINF_110017100	972	1	2939	8	2352.62
LINF_110017200	1443	4	3286.75	6	3431.17
LINF_110017300	444	28	1036.32	70	1088.47
LINF_110017400	1011	102	1733.57	189	1762.21
LINF_110017500	444	165	1029.18	231	1121.24
LINF_110017600	3507	2	4703.5	4	5103.5
LINF_110017700	2271	9	3272.89	20	3249.55
LINF_110017800	1326	73	1826	73	1885.55
LINF_110017900	393	1669	859.832	1751	876.019
LINF_110018000	2079	3	2963.33	17	2962.88
LINF_110018100	552	38	2346.63	36	2727.94
LINF_110018200	1977	14	2680.93	36	2667.78
LINF_110018400	480	57	1722.11	64	1700.81
LINF_110018500	5355	1	5907	-	-
LINF_110018600	1011	162	1266.38	363	1280.43
LINF_110018800	561	182	890.962	408	932.358
LINF_110018900	1209	143	1551.65	98	1579.56
LINF_110019000	1335	21	1862.05	34	1856.44
LINF_110019100	5328	-	-	5	5622.8
LINF_110019200	1884	8	2083	31	2514.81
LINF_110019300	603	153	1217.58	187	1253.11
LINF_110019400	1311	67	1598.87	91	1625.21
LINF_110019500	1857	25	2000.44	60	2031.32
LINF_110019600	222	537	272.836	676	264.791
LINF_110019700	1161	26	1275.38	34	1239.65
LINF_120005000	906	220	976.709	206	1014.87
LINF_120005100	648	88	753.92	99	754.152
LINF_120005200	852	776	1036.65	565	1040.92
LINF_120005300	1404	69	1554.93	86	1550.71
LINF_120005400	324	925	453.816	687	452.368
LINF_120005500	1272	66	1573.82	74	1581.03
LINF_120005600	579	142	1130.8	111	1147.77
LINF_120005800	273	52	589.808	199	590.241
LINF_120005900	618	116	882.664	117	842.017
LINF_120006000	1446	18	2307.22	9	2437.22
LINF_120006100	828	25	1811.28	69	1717.32
LINF_120006200	2445	-	-	2	3357.5
LINF_120006400	1749	3	3398	2	3930.5
LINF_120006500	1365	40	1644	73	1648.05
LINF_120006600	3216	1	4869	3	5282.67
LINF_120006700	2451	2	3353.5	10	3505.3
LINF_120006800	1203	23	1447.74	36	1426.25
LINF_120006900	2727	3	3005.67	8	3048.12
LINF_120007000	4941	-	-	1	5058
LINF_120007100	3285	1	4544	1	4531
LINF_120007200	1236	39	1674.51	56	1639.8
LINF_120007300	888	92	1504.93	88	1519.09
LINF_120007400	3582	-	-	2	4732
LINF_120007500	2097	1	3547	6	2352.5
LINF_120007600	2355	13	3192.69	11	3195.55
LINF_120007800	1713	11	2044.09	37	2031.84
LINF_120007900	2124	3	3810.33	10	3055.5
LINF_120008000	4704	1	4992	2	5019
LINF_120008100	5697	-	-	3	5434.67
LINF_120008200	1908	6	2316.67	25	2317.56
LINF_120008400	2601	4	4443.25	10	4843.2
LINF_120008500	6024	1	7029	-	-
LINF_120008600	1686	1	2890	6	3806
LINF_120008700	1113	14	2272.86	31	2102.39
LINF_120008800	954	119	1213.13	171	1211.17
LINF_120008900	4440	-	-	2	5077
LINF_120009000	1251	23	1735.65	84	1573.58
LINF_120009100	1146	33	2238.52	68	1979.31
LINF_120009200	1233	21	1492.38	32	1508.44
LINF_120009300	486	203	1535.75	242	1554.43
LINF_120009500	2004	11	2262	31	2309.97
LINF_120009600	1956	24	2232.21	25	2264.04
LINF_120009700	3270	4	4488.25	3	4614.67
LINF_120009800	2355	-	-	1	3064
LINF_120009900	2130	1	3170	1	2313
LINF_120010300	567	1	2863	4	3090.25
LINF_120010400	2910	-	-	4	3727.5
LINF_120010500	414	566	661.862	244	748.033
LINF_120010600	1818	53	2361.98	67	2356.52
LINF_120010700	504	394	820.515	517	821.12
LINF_120010800	1500	-	-	5	3405
LINF_120011200	1557	26	2141.88	59	2150.98
LINF_120011300	3042	1	3458	9	3399.78
LINF_120011500	1494	24	2089.75	32	2080.25
LINF_120011600	1638	-	-	3	3075.33
LINF_120011700	1854	5	2675.8	13	2510.38
LINF_120011800	2886	-	-	2	4451
LINF_120011900	1032	65	2398.68	40	2346.2
LINF_120012000	1299	54	1970.06	109	1982.17
LINF_120012100	495	104	1001.88	124	1037.56
LINF_120012200	2553	7	3061.86	17	3045.88
LINF_120012300	327	102	609.775	98	490.888
LINF_120012350	327	57	1142.79	56	1223.93
LINF_120012800	1134	21	3490.48	12	3296.08
LINF_120012900	486	2	1672.5	-	-
LINF_120013100	616	5	2853.4	9	2636.33
LINF_120013500	1626	3	2536	5	3255.2
LINF_120013700	1389	5	2762.8	17	2105.94
LINF_120014000	1995	5	2952.4	6	2800.17
LINF_120014400	1254	73	2444.77	159	2123.96
LINF_120014500	468	159	1255.67	253	1406.66
LINF_120014700	1392	50	2555.8	61	2256.84
LINF_120015000	1884	2	4177.5	1	4260
LINF_120015100	5094	5	5294	6	5260.17
LINF_120015200	1827	9	2808.44	44	2660.98
LINF_120015300	3864	-	-	2	5146.5
LINF_120015500	1098	32	1879.03	50	1806.88
LINF_120015600	2487	-	-	8	4363.25
LINF_120015700	3369	2	5110.5	4	5163.25
LINF_120015800	2844	2	4141.5	6	4261.17
LINF_120015900	2103	4	2770	17	2811.12
LINF_120016000	2634	10	2734.6	8	2695.5
LINF_120016100	4827	-	-	1	6622
LINF_120016200	1689	-	-	3	2937.67
LINF_120016300	3027	-	-	2	3332
LINF_120016400	4233	-	-	1	4989
LINF_120016500	990	20	1464	22	1482.36
LINF_120016600	2601	4	2852.75	6	2947.83
LINF_120016700	4119	-	-	5	4762
LINF_120016800	1320	2	3649	12	3412
LINF_120016900	1032	49	1978.22	57	1859.02
LINF_120017000	1920	7	2366.29	10	2373.2
LINF_120017100	642	24	1155.71	38	1113.58
LINF_120017200	1869	42	2216.52	57	2172.32
LINF_120017300	312	269	663.833	366	672.904
LINF_120017400	2613	4	2902.75	3	2923
LINF_120017500	2916	2	3383	11	3442.36
LINF_120017600	1863	1	2508	3	3961
LINF_120017700	1317	14	1641.79	37	1720.38
LINF_130005000	1953	9	2047	33	2060.76
LINF_130005100	1176	7	1611.71	40	1742.55
LINF_130005200	606	262	844.336	387	841.393
LINF_130005300	885	140	1431.45	133	1405.92
LINF_130005400	807	132	1041.45	121	1066.14
LINF_130005500	1386	16	1548.5	15	1724.47
LINF_130005600	591	58	1193.02	63	1197.14
LINF_130005700	4293	1	5094	2	4798
LINF_130005800	1512	27	2946.07	75	2597.75
LINF_130005900	1311	-	-	7	2474.14
LINF_130006000	1059	26	1657.23	63	1639.16
LINF_130006100	360	56	835.804	89	768.112
LINF_130006200	2181	3	3369	17	2539.53
LINF_130006300	561	226	1272.14	280	1331.24
LINF_130006400	1422	30	1559.1	31	1557.06
LINF_130006500	1509	7	2500.71	14	2232.07
LINF_130006600	1872	23	2027.22	38	2126.39
LINF_130006800	747	1	2201	3	1243
LINF_130007000	1998	3	3320.33	12	3273.67
LINF_130007100	636	75	1258.8	93	1402.63
LINF_130007200	1260	3	1786	22	1850.45
LINF_130007300	924	53	1628.74	138	1639.87
LINF_130007400	1602	43	1769.77	65	1797.2
LINF_130007500	783	27	926.556	47	946.681
LINF_130007600	5235	-	-	1	8127
LINF_130007700	1356	1869	1677.91	2599	1681.64
LINF_130007900	1356	-	-	2	1917
LINF_130008000	1356	1939	1680.4	2901	1678.67
LINF_130008200	1356	-	-	1	1847
LINF_130008300	1356	-	-	1	1886
LINF_130008400	1356	796	1686.13	1179	1690.26
LINF_130008500	1356	1	1875	-	-
LINF_130008700	1356	-	-	3	1884.33
LINF_130008800	1356	34	1675.65	58	1681.79
LINF_130009000	3297	6	3299	25	3378.24
LINF_130009100	2010	48	2196.52	80	2230.51
LINF_130009200	1797	2	2182	7	2227
LINF_130009300	3273	1	4458	3	3895
LINF_130009400	366	9838	823.068	4560	833.683
LINF_130009500	1494	91	2181.01	110	2172.22
LINF_130009600	651	9	1747.67	10	1806.8
LINF_130009700	2283	15	2754.8	39	2779.56
LINF_130009800	1539	48	2298.48	97	2363.68
LINF_130010000	750	325	1130.94	413	1158.12
LINF_130010100	837	6	1383.33	4	1576.25
LINF_130010300	597	166	1073.93	257	1066.88
LINF_130010400	2004	5	2782.6	10	2772.2
LINF_130010500	597	1997	747.541	2717	740.254
LINF_130010600	426	2867	1127.34	2563	1117.19
LINF_130010700	5574	1	6860	-	-
LINF_130010800	978	71	1359.46	96	1340.27
LINF_130010900	894	18	1472.22	15	1520.6
LINF_130011000	825	4	1315	21	955.667
LINF_130011100	1275	4	2464.75	8	2546.75
LINF_130011200	885	61	1147.75	93	1140.34
LINF_130011300	4014	-	-	1	4334
LINF_130011400	1824	1	2638	7	2600.14
LINF_130011500	2115	4	3157	6	3443.33
LINF_130011600	1347	30	1936.57	51	1948.06
LINF_130011700	1725	7	2106	11	1920.91
LINF_130011800	2871	-	-	2	5563.5
LINF_130011900	4272	-	-	1	4594
LINF_130012000	1329	8	2340.38	9	2136.22
LINF_130012100	1029	78	1253	145	1283.06
LINF_130012200	2544	8	3138.75	31	3187.03
LINF_130012300	2934	6	3618.67	8	3556.88
LINF_130012400	657	49	1350.78	83	1374.39
LINF_130012600	1656	21	1951.9	69	2079.84
LINF_130012700	1842	10	2885.6	37	2621.62
LINF_130012800	2085	12	2161.17	28	2220.25
LINF_130012900	672	30	1010.83	43	1345.28
LINF_130013100	759	221	901.688	235	923.702
LINF_130013200	3711	2	4204	4	4059.75
LINF_130013300	3498	2	3689	27	3715.3
LINF_130013500	1044	26	1628.15	73	1586.36
LINF_130013600	1587	24	2354.33	41	2346.15
LINF_130013700	2088	1	3245	1	3153
LINF_130013800	1035	38	1473.79	54	1442.59
LINF_130013900	1749	33	2093.3	52	2102.88
LINF_130014000	2466	5	3401.8	16	3471.38
LINF_130014100	4569	1	5251	-	-
LINF_130014200	828	167	1078.88	195	1085.2
LINF_130014300	2178	25	2517.2	21	2490.48
LINF_130014400	1452	41	1803.85	41	1829.66
LINF_130014500	1698	38	2010.05	34	1987.76
LINF_130014600	1932	4	2797.25	22	2789.91
LINF_130014700	4971	2	4950	9	4985.78
LINF_130014800	1473	4	1688	18	1743.56
LINF_130014900	1389	20	1726.85	27	1719.63
LINF_130015000	984	10	1648.8	12	1680.42
LINF_130015100	3918	1	4296	2	4055
LINF_130015200	1101	68	1409.44	74	1422.46
LINF_130015300	5226	-	-	2	5492.5
LINF_130015400	525	26	1240.62	51	1240.08
LINF_130015500	720	241	946.672	83	947.108
LINF_130015600	927	29	2445.07	56	2426.91
LINF_130015800	4323	-	-	3	4760.67
LINF_130015900	1317	46	2008.72	127	1992.57
LINF_130016000	3228	1	4432	2	4311
LINF_130016100	1548	4	2537	8	2367.75
LINF_130016200	270	326	539.377	177	521.944
LINF_130016300	1779	22	2672.09	99	2672.65
LINF_130016400	1212	102	1418.72	189	1477.76
LINF_130016500	963	93	1255.98	91	1305.01
LINF_130016600	609	183	901.437	60	956.55
LINF_130016700	1629	21	2037.81	47	2098.74
LINF_130016800	357	100	1022.24	43	1098.37
LINF_130016900	2133	-	-	3	3444.67
LINF_130017000	558	315	1009.85	366	1074.1
LINF_130017100	1506	-	-	1	5822
LINF_130017200	822	4096	1133.77	3738	1136.68
LINF_130017300	822	103	1863.95	162	1886.43
LINF_130017400	1632	2	2348	17	2612
LINF_130017600	453	100	1133	176	1147.46
LINF_130017700	579	14	1510.21	27	1642.81
LINF_130017800	447	4	1621.5	20	1833.2
LINF_130017900	2442	2	2875.5	15	2698.27
LINF_130018000	984	136	1431.87	144	1451.72
LINF_130018100	2781	-	-	2	3874
LINF_130018200	591	4	1394.75	23	1322.91
LINF_130018300	1263	2	2007	6	2762.67
LINF_130018400	1398	-	-	1	2269
LINF_130018500	1470	26	2705.08	66	2735.86
LINF_130018600	4179	-	-	2	4553
LINF_130018700	3435	6	3898.83	6	3865.33
LINF_130018800	2514	-	-	3	2939.67
LINF_130018900	2094	7	2857.57	28	3069
LINF_130019000	1770	27	2212.85	38	2216.89
LINF_130019100	1215	3	1888.33	20	1927
LINF_130019200	1974	8	2320.38	26	2354.54
LINF_130019500	741	92	1322.28	149	1345.15
LINF_130019600	225	27	1394.15	77	1439.69
LINF_130019700	1878	21	2151.57	30	2156.9
LINF_130019800	3867	-	-	8	4960.88
LINF_130019900	333	78	861.949	133	878.188
LINF_130020000	705	67	1311.79	89	1323.57
LINF_130020200	477	161	1287.71	179	1304.19
LINF_130020300	2319	6	2497.5	14	2502.14
LINF_130020400	3174	1	4990	9	4960.11
LINF_130020500	1302	1	2820	5	3356.6
LINF_130020600	402	229	1053.77	319	1063.84
LINF_130020700	2838	10	3317.9	5	3329.4
LINF_130020800	3294	-	-	1	3823
LINF_130020900	1464	84	1924.33	165	1922.08
LINF_130021000	3555	1	4488	6	4243.17
LINF_130021100	1098	179	1635.73	551	1600.92
LINF_130021200	1764	-	-	1	2461
LINF_130021300	417	10	1850.9	11	2137.73
LINF_130021400	2253	1	4147	1	4260
LINF_130021500	3615	2	5009	1	4672
LINF_130021700	1710	4	3214.25	12	3197.17
LINF_130021900	1722	20	2101.55	49	2115.31
LINF_130022100	1617	79	2047.54	51	2054.82
LINF_130022200	321	9916	377.48	5730	377.704
LINF_130022300	819	445	1189.66	288	1194.83
LINF_130022400	1824	3	2638.67	22	2624.55
LINF_130022500	1374	19	1848.74	42	1850.12
LINF_140005000	924	118	1064.58	157	1064.05
LINF_140005100	3144	5	3089.4	17	3104.59
LINF_140005200	813	97	1009.66	105	1013.12
LINF_140005300	3069	3	4083.33	4	4014.5
LINF_140005400	2199	13	2306.54	31	2284.32
LINF_140005500	576	229	888.17	323	880.269
LINF_140005600	840	13	1607.38	27	1596.37
LINF_140005700	837	128	1083.21	111	1072.06
LINF_140005800	1155	26	1762.96	55	1875.64
LINF_140005900	3090	3	3491	3	3321.67
LINF_140006000	1572	23	1795.7	55	1830.24
LINF_140006100	1074	9	1437.67	23	1429.17
LINF_140006200	1059	49	1909.57	71	1743.69
LINF_140006300	1578	19	2139.26	46	2274.46
LINF_140006400	546	152	1014.47	99	1019.98
LINF_140006500	1083	4	2548.5	11	2919.73
LINF_140006600	2058	-	-	9	3223.67
LINF_140006700	1515	46	1994.5	32	1966.09
LINF_140006800	600	459	1438.73	390	1444.64
LINF_140006900	522	41	858.39	114	854.939
LINF_140007000	1332	94	1711.56	121	1745.21
LINF_140007100	1365	2	3359	7	3138.57
LINF_140007200	321	20	2102.95	40	2123.5
LINF_140007400	429	147	695.027	107	691.196
LINF_140007500	519	134	1207.28	136	1381.4
LINF_140007600	2169	20	2787.3	25	2732.84
LINF_140007700	1485	17	1649.35	39	1667.33
LINF_140007800	2892	9	3400.44	3	3661.33
LINF_140007900	843	213	1103.84	252	1090.12
LINF_140008000	723	64	1116.33	112	1106.88
LINF_140008100	858	50	1737.84	60	1605.82
LINF_140008200	2412	4	4381.75	11	4189.82
LINF_140008300	2136	2	3522	12	2956.67
LINF_140008400	3285	-	-	4	4683.75
LINF_140008500	2031	3	3303.67	11	3148.09
LINF_140008600	3126	3	3359.33	15	3246.07
LINF_140008800	1824	2	2667.5	11	3149.64
LINF_140008900	933	3	1826.67	21	1875.71
LINF_140009000	933	-	-	16	2808
LINF_140009200	933	5	2622	45	1513.73
LINF_140009300	576	166	866.042	178	907.376
LINF_140009400	3213	-	-	1	3383
LINF_140009500	2463	3	3116	6	3178.67
LINF_140009600	1203	46	1347.22	60	1366.85
LINF_140009700	1653	22	1818.64	43	1808.07
LINF_140009800	525	40	1342.78	38	1333.92
LINF_140009900	969	39	1438.54	67	1425.61
LINF_140010000	1380	8	2639	32	2517.19
LINF_140010100	786	3	2184.67	-	-
LINF_140010200	825	5	1982.6	13	1447.46
LINF_140010400	1647	55	2476.84	151	2481.09
LINF_140010500	1404	3	2182	1	2528
LINF_140010600	330	133	504.165	305	511.105
LINF_140010700	1515	54	1959.24	79	1950.22
LINF_140010800	1500	21	2500.9	18	2551.72
LINF_140010900	990	3	1976.33	8	2366.38
LINF_140011000	1467	-	-	1	1499
LINF_140011100	783	98	1178.45	262	1193.53
LINF_140011200	3525	1	3644	12	3789.17
LINF_140011300	381	269	1105.84	246	1121.55
LINF_140011400	4152	1	4318	3	4451.33
LINF_140011500	1470	23	1807	29	1852.62
LINF_140011600	1392	16	1616.25	27	1634.19
LINF_140011700	1776	1	1612	3	1705
LINF_140011800	681	121	1125.96	224	1120.57
LINF_140012000	843	20	2168.05	18	2055.61
LINF_140012100	858	3	1830.67	8	2355.38
LINF_140012200	855	80	1568.11	100	1605.75
LINF_140012300	885	62	1758.23	69	1534.22
LINF_140012400	900	2	1808.5	1	2291
LINF_140012500	900	26	2392.62	23	2497.09
LINF_140012600	1008	3	2088	3	2002.67
LINF_140012700	981	2	3032.5	5	2269.8
LINF_140012800	972	-	-	1	3785
LINF_140012900	1128	2	1795	6	2307.33
LINF_140013000	1125	4	2426.25	8	2224.38
LINF_140013100	1179	1	1704	5	2270.4
LINF_140013300	5853	-	-	1	5727
LINF_140013400	1254	49	2128.14	73	2150.88
LINF_140013500	1194	11	2551.18	24	2593.83
LINF_140013600	561	140	1016.25	163	1054.31
LINF_140013800	1290	2	2483	1	2408
LINF_140013900	3924	-	-	4	4659.25
LINF_140014000	1734	14	2107.5	21	2124.57
LINF_140014100	2979	1	4545	1	4363
LINF_140014400	348	57	2213.14	33	2240.45
LINF_140014500	348	47	1748.66	41	1799.17
LINF_140014700	1548	-	-	2	2787.5
LINF_140014800	3264	6	3466.33	14	3543.43
LINF_140014900	1974	6	2604.67	24	2584.12
LINF_140015100	225	335	745.654	316	841.741
LINF_140015200	1821	81	2193.98	111	2114.38
LINF_140015400	2586	1	3538	2	3556
LINF_140015500	2637	-	-	2	4781
LINF_140015600	507	44	1131.14	39	1142.05
LINF_140015700	3345	5	3880	13	4082.62
LINF_140015800	864	14	1721.64	49	1547.02
LINF_140016000	1131	6	2376.5	15	2050.33
LINF_140016100	1296	29	1930.76	54	1970.7
LINF_140016200	3060	4	3150.5	17	3145.76
LINF_140016300	945	40	1690.62	32	1708.16
LINF_140016400	1518	84	1826.54	121	1826.37
LINF_140016500	543	13	1753.15	33	1767.73
LINF_140016600	624	101	916.485	132	916.076
LINF_140016700	813	206	855.971	283	878.233
LINF_140017000	1197	43	1576.79	82	1608.17
LINF_140017100	693	123	885.073	118	971.39
LINF_140017150	1422	-	-	4	4230
LINF_140017600	2808	4	3843	6	3754
LINF_140017700	1431	40	2114.85	67	2136.1
LINF_140017800	1083	2	2890.5	5	2302
LINF_140017900	1044	127	1529.91	179	1562.2
LINF_140018000	1290	118	1899.14	130	2011.99
LINF_140018100	2292	3	3428.67	8	3394
LINF_140018200	2130	12	2620.17	47	2523.47
LINF_140018300	1683	80	2088.99	159	2086.68
LINF_140018400	1596	17	2201.12	24	2216.46
LINF_140018500	786	109	1137.39	263	1157.57
LINF_140018600	2796	2	3714.5	6	3856
LINF_140018700	1707	4	2495.5	41	2516.24
LINF_140018800	909	69	1264.38	98	1323.26
LINF_140018900	618	72	1485.53	64	1453.72
LINF_140019000	459	55	1496.44	82	1514.11
LINF_140019100	459	4366	678.798	3017	678.81
LINF_140019200	1737	8	2126.88	9	2146
LINF_140019300	2406	-	-	9	2824.11
LINF_140019400	3294	1	5951	7	4892.14
LINF_140019500	1074	18	1900.89	25	1872.52
LINF_140019600	1398	30	2377.03	221	1959.16
LINF_140019700	1725	14	2465.71	38	2476.53
LINF_140019800	1245	9	2361	21	2356.71
LINF_140019900	1869	32	2197.12	70	2186.03
LINF_140020000	1581	30	2254.43	138	2242.6
LINF_140020100	2049	31	2345.16	29	2574.1
LINF_140020200	954	61	1705.66	118	1670.48
LINF_140020300	666	672	939.57	656	947.434
LINF_140020400	447	52	1647.13	41	1810.29
LINF_140020500	3084	3	4447.67	3	4993.67
LINF_140020600	1668	-	-	3	2876.67
LINF_140020700	2013	24	2278.58	45	2273.4
LINF_140020800	5250	-	-	3	5840
LINF_140021000	2058	71	2195.34	218	2193.2
LINF_140021100	423	118	1430.1	91	1419.22
LINF_140021200	1455	34	1669.62	37	1639.62
LINF_140021300	936	48	1642.15	79	1640.24
LINF_140021400	2538	5	3078.2	22	2853.41
LINF_150005000	408	9	582.111	2	533.5
LINF_150005100	1863	15	2103.47	51	2053.41
LINF_150005200	1278	38	1435.84	101	1435.07
LINF_150005300	999	50	1395.7	69	1423.71
LINF_150005400	840	8	1872.25	36	1808.08
LINF_150005500	3051	-	-	1	3124
LINF_150005600	1407	25	2219.76	58	2353.5
LINF_150005700	966	39	1612.15	55	1655.09
LINF_150005800	1272	11	2787.55	13	2616.46
LINF_150005900	1695	25	2193.08	42	2170.5
LINF_150006000	2394	7	2879.43	6	2807.5
LINF_150006100	957	28	1861.64	42	1731.07
LINF_150006200	1953	-	-	3	2717
LINF_150006300	648	5	1771.4	16	2128.75
LINF_150006400	549	6	1682.33	19	1730
LINF_150006500	2532	1	4657	9	4147.78
LINF_150006600	1215	38	1833.71	55	1937.45
LINF_150006700	2238	3	2765	21	2875.57
LINF_150006800	1758	8	2321.62	28	2325.96
LINF_150006900	492	98	1320.47	120	1380.73
LINF_150007000	879	31	1768.26	66	1746.8
LINF_150007100	669	2489	847.953	2444	845.672
LINF_150007200	1560	5	2296.8	22	1961.09
LINF_150007300	1125	41	1264.24	60	1252.07
LINF_150007400	648	133	1046.8	140	1015.74
LINF_150007500	1044	8	1183.62	13	1203
LINF_150007600	1761	50	2057	50	2135.1
LINF_150007700	1218	59	1740.07	70	1730.2
LINF_150007800	5838	1	5635	1	6313
LINF_150007900	1434	41	1900.95	50	1898.46
LINF_150008000	774	23	1996.96	23	2106.22
LINF_150008100	564	52	1408.08	40	1427.25
LINF_150008200	564	36	1416.67	35	1600
LINF_150008300	2403	11	2656.27	26	2674.5
LINF_150008400	441	41	1195.9	60	1254.08
LINF_150008500	1968	9	2753.44	28	3040.29
LINF_150008600	2280	-	-	1	2613
LINF_150008700	3063	2	3614	4	3498.25
LINF_150008800	1485	24	1911.75	28	1885.11
LINF_150008900	1965	27	2143.41	64	2175.47
LINF_150009000	3096	7	3038.71	18	3098.67
LINF_150009100	327	8808	471.822	4217	464.094
LINF_150009200	327	8330	531.027	3484	528.676
LINF_150009300	1197	71	1496.08	113	1529.57
LINF_150009400	2040	3	2414	4	2348.5
LINF_150009500	2085	16	2257	30	2283.87
LINF_150009600	441	96	1133.33	153	1145.71
LINF_150009700	1038	20	1571.95	42	1594.71
LINF_150012200	2154	6	2387.67	20	2387.2
LINF_150012300	3009	1	3283	5	3153.6
LINF_150012400	477	64	1247.77	112	1221.83
LINF_150012500	1137	4	2745.5	12	2967.83
LINF_150012600	5340	1	6591	-	-
LINF_150012700	2025	4	3059.25	14	3094
LINF_150012800	5241	-	-	1	5384
LINF_150012900	1629	14	2260.14	45	2302.18
LINF_150013000	999	7	2669.57	18	2673.94
LINF_150013100	978	90	1297.69	168	1313.14
LINF_150013200	708	182	950.885	260	946.042
LINF_150013300	5304	-	-	4	5711.5
LINF_150013500	1554	1	2721	10	3060.3
LINF_150013600	1347	30	1641.9	67	1675.55
LINF_150013700	2868	-	-	2	4651.5
LINF_150013800	4110	-	-	1	4958
LINF_150013900	2100	-	-	1	3994
LINF_150014000	1431	11	2532.82	51	2310.69
LINF_150014100	3102	-	-	12	3165.67
LINF_150014200	606	91	958.231	73	960.671
LINF_150014300	1476	30	1572.4	39	1654.31
LINF_150014400	3123	7	3708.71	14	3583.14
LINF_150014600	1968	11	2249.82	15	2208.53
LINF_150014700	1134	36	1343.94	93	1361.65
LINF_150014800	243	40	1713.3	42	1733.4
LINF_150015300	1998	1	2658	-	-
LINF_150015400	8040	-	-	1	8702
LINF_150015500	1983	4	3289	8	3347.12
LINF_150015600	1101	13	1515.92	22	1565.77
LINF_150015700	1968	52	2070.15	50	2062.64
LINF_150015900	6249	-	-	1	6549
LINF_150016000	1692	41	2242.12	101	2265.5
LINF_150016100	336	127	577.213	130	581.208
LINF_150016200	3135	2	3438.5	12	3416.08
LINF_150016300	1311	20	1708.7	58	1722.9
LINF_150016400	2481	-	-	6	2769.67
LINF_150016500	1386	8	1500.12	32	1498.94
LINF_150016600	2895	4	3194.5	3	3318.33
LINF_150016700	972	8	2710.38	31	2710.42
LINF_150016800	1878	16	1987.75	65	1896.55
LINF_150016900	1422	8	2219.38	20	2130.1
LINF_150017000	2226	-	-	14	3201.43
LINF_150017300	2496	-	-	9	4045.22
LINF_150017400	564	145	1008.01	136	1207.94
LINF_150017500	3618	2	4163.5	3	3959.67
LINF_150017600	660	2666	972.231	2679	983.488
LINF_150017700	939	16	1753.62	18	1906.44
LINF_150017800	1203	69	1735.43	121	1741.76
LINF_150017900	2154	4	2417.5	14	2338.57
LINF_150018000	594	206	1155.06	113	1214.73
LINF_150018200	588	1672	710.146	1750	710.877
LINF_150018400	1080	18	2171.5	56	2106.89
LINF_150018500	1284	-	-	3	1984
LINF_150018600	600	125	1407.42	101	1394.48
LINF_150018700	351	82	606.439	159	679.629
LINF_150018800	573	74	1117.18	204	1139.55
LINF_150018900	351	115	576.643	125	619.368
LINF_150019000	600	95	1408.86	124	1421.72
LINF_150019100	1287	26	1836.73	25	1856.6
LINF_150019300	3765	3	4085	3	4198.67
LINF_150019500	336	3924	736.145	2439	748.133
LINF_150019600	336	456	921.419	885	926.528
LINF_150019700	2379	5	2864.4	23	2814.35
LINF_150019800	1437	17	2058.53	49	2085.76
LINF_150019900	1476	6	1820.83	76	1935.74
LINF_150020000	1476	6	2972.5	1	3100
LINF_150020100	1476	49	2847.02	37	2742.08
LINF_150020200	1476	69	2959.96	28	2683.93
LINF_150020300	516	427	791.562	302	779.748
LINF_150020400	1224	6	2067.67	3	3928.67
LINF_150020500	1635	34	2125.21	77	2100.94
LINF_150020700	3711	1	4683	2	4781
LINF_150020800	4242	-	-	6	5209.83
LINF_150020900	2502	3	3693.67	16	3699.31
LINF_150021000	4368	-	-	1	4431
LINF_150021100	1323	76	1813.38	68	1857.07
LINF_150021200	1116	25	1306.8	25	1314.24
LINF_150021300	1113	44	1141	28	1188.96
LINF_150021400	912	86	1158.74	63	1172.22
LINF_150021500	2115	12	2201.42	38	2186.08
LINF_150021600	915	87	989.931	181	1051.44
LINF_150021700	1218	32	1338.88	48	1327.52
LINF_150021800	1218	34	1694.47	43	1657.65
LINF_150022000	900	29	1226.66	31	1310.23
LINF_150022100	888	61	985.18	87	1070.77
LINF_150022200	1437	75	1747.35	132	1748.81
LINF_150022300	3027	8	3383.38	27	3415.89
LINF_150022400	288	27	1414.19	43	1435.93
LINF_150022500	1713	42	2446.48	52	2469.42
LINF_150022600	882	18	1671.78	20	1748.85
LINF_150022700	1377	16	1959.75	46	1933.09
LINF_150022750	378	118	999.119	251	999.622
LINF_150022800	381	505	1138.46	330	1148.59
LINF_150022900	2793	-	-	2	3578.5
LINF_150023000	2823	-	-	3	3693.33
LINF_150023100	2001	8	2311.75	4	2436
LINF_150023200	879	74	1239.07	129	1262.88
LINF_150023300	597	89	880.685	111	958.099
LINF_150023400	1218	58	1335.83	53	1313.13
LINF_150023500	669	23	893.391	50	895.68
LINF_150023600	1161	73	1402.38	292	1417.16
LINF_150023700	3771	-	-	2	4051
LINF_150023800	1632	7	2008.14	5	2104.4
LINF_160005000	558	66	1222.03	99	1237.31
LINF_160005100	1125	86	1199.77	186	1208.84
LINF_160005200	645	201	870.502	90	876.244
LINF_160005300	1098	45	1153	99	1149.2
LINF_160005400	954	47	1184.34	94	1199.15
LINF_160005500	1974	12	1966.08	40	2000.62
LINF_160005600	2880	10	3212.6	17	3191.41
LINF_160005700	1200	93	1225.54	138	1225.37
LINF_160005800	2208	2	2849	13	2866.46
LINF_160005900	285	59	1049.68	176	996.011
LINF_160006000	984	10	1328.1	98	1343.59
LINF_160006100	2097	5	2587.4	13	2521.15
LINF_160006200	2481	7	3666.71	17	3614.29
LINF_160006300	2361	3	2590	17	2684.24
LINF_160006400	627	28	1726.43	20	1884.3
LINF_160006500	507	322	1131.91	209	1129.71
LINF_160006600	708	97	1180.19	178	1155.53
LINF_160006700	918	218	1118.02	309	1122.34
LINF_160006900	459	43	1403.67	146	1429.73
LINF_160007000	1062	42	1808.57	52	1794.58
LINF_160007100	900	23	2137.48	46	2105.65
LINF_160007200	1152	4	3549.5	13	2224.69
LINF_160007300	396	236	729.441	176	748.608
LINF_160007400	528	24	2565.46	29	2684.52
LINF_160007500	2280	18	2530.5	45	2549.16
LINF_160007600	531	41	1736.85	113	1805.73
LINF_160007700	1488	36	2190.61	52	2281.65
LINF_160007800	3129	4	3245.75	17	3368.76
LINF_160008000	774	145	1120.02	225	1127.06
LINF_160008100	1836	23	2052.78	29	1920
LINF_160008200	2070	14	2044.14	63	2155.4
LINF_160008300	3813	2	4597	7	4311.57
LINF_160008400	1164	25	1672.32	84	1651.37
LINF_160008500	858	124	1382.48	135	1382.27
LINF_160008600	1107	45	1463.31	63	1482.97
LINF_160008700	2064	10	3254.7	15	2796.13
LINF_160008800	1446	-	-	2	2589.5
LINF_160008900	2454	2	2964.5	7	3110
LINF_160009000	3003	-	-	4	3597.5
LINF_160009100	1059	22	1878.45	46	1830.26
LINF_160009200	1728	14	2280.14	19	2280.47
LINF_160009300	1707	5	2625	21	2712.14
LINF_160009400	558	23	1328.39	72	1374.89
LINF_160009500	3561	-	-	1	6288
LINF_160009600	705	67	1282.6	134	1321.19
LINF_160009700	480	2549	902.417	2287	912.739
LINF_160009800	555	4	2276.75	20	2477.2
LINF_160009900	3561	-	-	5	4696.2
LINF_160010000	600	2	982	5	1489.6
LINF_160010100	669	3	2091	13	2333.08
LINF_160010200	3519	1	4776	7	4418.43
LINF_160010300	987	4	3006.5	15	2633.27
LINF_160010400	942	42	1997.17	111	2057.95
LINF_160010500	984	76	1675.37	53	1735.32
LINF_160010600	486	70	1189.69	97	1292.52
LINF_160010700	1374	30	1794.1	24	1802.54
LINF_160010800	2205	11	2403.73	55	2478.82
LINF_160010900	393	2084	906.757	525	929.137
LINF_160011000	393	4	414	5	875.6
LINF_160011100	1218	11	1968.36	20	1898
LINF_160011200	5529	-	-	3	7648.33
LINF_160011300	393	1532	913.895	487	913.77
LINF_160011400	393	-	-	3	1726.33
LINF_160011500	3408	2	3643	9	3696.22
LINF_160011600	1965	6	2133.83	53	2181.43
LINF_160011700	2103	-	-	2	2798
LINF_160011800	318	66	1074.18	83	1194.66
LINF_160011900	552	13	1243.77	26	1252.19
LINF_160012000	1701	1	2465	2	2351
LINF_160012100	2025	2	2505.5	11	2660.55
LINF_160012200	1344	11	2291.73	15	2287.6
LINF_160012300	1656	49	2097.16	98	2039.08
LINF_160012400	2550	1	3316	3	3028.33
LINF_160012600	1590	6	1946.5	16	1875.25
LINF_160012800	2223	13	2861.85	25	2946.04
LINF_160012900	1809	13	2157.92	33	2194.97
LINF_160013000	993	26	2652.38	44	2483.84
LINF_160013400	1374	50	1562.24	91	1559.32
LINF_160013500	2253	12	3168	30	3048.57
LINF_160013600	1806	17	2063.71	59	2085.68
LINF_160013700	2034	11	2276.36	31	2262.68
LINF_160013800	882	12	1720.75	23	1695.7
LINF_160013900	2406	21	3011	51	2851.59
LINF_160014000	1425	37	1685.49	63	1668.43
LINF_160014100	687	225	1007.67	580	1034.39
LINF_160014200	2064	1	3172	1	3267
LINF_160014300	375	39	1293.59	103	1285.37
LINF_160014400	1989	2	2346	11	2348.45
LINF_160014500	894	23	1469.87	57	1515.84
LINF_160014600	4968	1	5456	3	5248.67
LINF_160014700	408	38	1194.29	133	1206.74
LINF_160014800	612	151	1249.57	128	1247.45
LINF_160014900	663	148	742.831	75	741.733
LINF_160015000	339	1730	391.68	533	392.979
LINF_160015100	1395	156	1558.49	142	1554.61
LINF_160015200	1467	63	1688.46	75	1679.01
LINF_160015300	2286	1	3532	4	3676
LINF_160015500	1410	-	-	2	3531.5
LINF_160015600	2493	-	-	3	3575.33
LINF_160015700	2835	-	-	1	3612
LINF_160015800	2922	1	4621	-	-
LINF_160015850	2895	2	3015.5	-	-
LINF_160016000	2937	-	-	2	3474.5
LINF_160016100	348	343	701.201	408	684.37
LINF_160016200	1551	5	2376.2	19	2308.84
LINF_160016300	1902	2	3102.5	1	2826
LINF_160016400	984	-	-	19	1753.63
LINF_160016500	5775	-	-	1	6528
LINF_160016600	1680	1	3629	1	3925
LINF_160016700	1113	13	2372.15	28	2354.07
LINF_160016800	474	355	689.645	361	739.817
LINF_160016900	543	146	898.356	162	925.438
LINF_160017100	1932	3	2240.67	8	2221.75
LINF_160017200	354	377	647.711	230	697.335
LINF_160017300	729	62	1509.34	33	1599.85
LINF_160017400	1395	12	1522.42	97	1548.67
LINF_160017500	156	1470	739.899	1726	733.929
LINF_160017600	1611	32	2270.72	56	2214.88
LINF_160017700	4323	-	-	2	4899
LINF_160017800	1101	68	1543.96	80	1527.51
LINF_160017900	3831	-	-	10	4142
LINF_160018100	5445	1	5526	-	-
LINF_160018300	444	39	1825.1	83	1850.28
LINF_160018400	5229	1	5789	1	5968
LINF_160018600	300	985	506.111	1022	509.148
LINF_160018700	2199	5	2801.4	16	2633.44
LINF_160018800	3003	5	3601.6	26	3599.77
LINF_160018900	342	38	1432.74	78	1375.74
LINF_160019000	342	10	1726.4	20	1907.75
LINF_160019100	4197	-	-	2	5237
LINF_160019400	1800	1	3646	1	3048
LINF_160019500	327	78	1238.14	57	1244.04
LINF_160019600	549	62	1442.32	106	1423.25
LINF_160019700	2808	-	-	10	5067.9
LINF_160019800	864	61	1375.67	176	1398.05
LINF_160019900	591	93	1057.25	91	1061.69
LINF_160020000	1569	25	2003.52	37	1971.65
LINF_160020100	1071	2	3133	5	2958.2
LINF_160020200	1800	1	1894	2	3195.5
LINF_160020600	918	96	1141.31	111	1153.86
LINF_160020900	1923	1	2645	1	2715
LINF_160021000	1095	17	2459.71	41	2363.66
LINF_160021100	1713	15	2129.07	33	2113.52
LINF_160021200	342	251	1096.39	205	1064.9
LINF_160021300	3453	2	4041.5	3	4103.33
LINF_160021400	1332	57	1446.86	50	1456.64
LINF_160021500	4023	2	4711.5	-	-
LINF_160021600	3696	1	4201	4	4380.25
LINF_160021700	2079	13	2480.77	34	2493.26
LINF_160021800	1026	37	1477.43	107	1492.31
LINF_160021900	3249	2	3737	3	3685.33
LINF_160022000	849	89	1182.9	158	1265.25
LINF_160022100	1908	6	3212.17	13	2934.62
LINF_160022200	807	88	1612.2	72	1630.89
LINF_160022300	1356	43	1799.95	47	1825.87
LINF_160022500	4914	-	-	1	6128
LINF_160022600	2073	2	3202.5	4	3828.75
LINF_160022900	417	176	694.722	273	690.582
LINF_170005000	2325	10	2967.5	7	3020.57
LINF_170005100	495	82	1053.57	88	1076.62
LINF_170005200	666	17	998.118	93	1023.4
LINF_170005300	678	44	1101.75	94	1118.96
LINF_170005400	636	22	1577.5	23	1641.43
LINF_170005500	789	143	1073.01	239	1060.94
LINF_170005600	714	184	1076.88	208	1070.1
LINF_170005700	1662	9	2519.44	21	2407.38
LINF_170005800	564	34	1605.71	35	1581.66
LINF_170005900	1350	97	1917.1	55	2008.76
LINF_170006000	1350	100	1636.29	74	1622.05
LINF_170006100	1350	9	1642.67	10	1621.2
LINF_170006200	1350	41	1646.02	34	1624.44
LINF_170006300	1350	34	1630.24	34	1609.29
LINF_170006400	1350	37	1637.27	44	1620.39
LINF_170006500	1350	41	1637.32	38	1610.66
LINF_170006600	1350	93	1631.3	89	1624.03
LINF_170006700	1350	5	1643.2	6	1610.5
LINF_170006800	1350	89	1637.44	100	1622.39
LINF_170006900	1350	38	1624.42	35	1620.57
LINF_170007000	1350	96	1636.26	80	1615.81
LINF_170007100	1350	416	1644.33	385	1633.57
LINF_170007200	1350	4	1625.25	13	1844.69
LINF_170007400	4245	-	-	1	7667
LINF_170007600	3990	2	4889.5	4	4815
LINF_170007800	3990	1	4952	1	4849
LINF_170007900	2004	12	2212.83	28	2223.86
LINF_170008000	1581	1	2560	4	2434.75
LINF_170008100	954	91	1465.97	54	1489.13
LINF_170008200	2604	1	2923	2	3490
LINF_170008300	1272	12	1655.75	33	1760.67
LINF_170008400	2124	12	2806.08	11	2677.82
LINF_170008500	3306	2	3917	4	3976.75
LINF_170008600	2097	2	2254	1	5476
LINF_170008700	3519	1	4993	4	4573.25
LINF_170008800	1080	14	2012.5	13	1775.38
LINF_170008900	2358	-	-	1	2973
LINF_170009000	822	131	982.031	104	1040.81
LINF_170009100	534	12	1862.58	22	2406.91
LINF_170009200	2178	5	2643	1	2700
LINF_170009300	612	3	1108.67	-	-
LINF_170009600	5208	1	5386	1	5496
LINF_170009700	411	402	687.1	256	705.941
LINF_170009800	1788	6	1942	15	2066.53
LINF_170009900	549	46	858.587	36	1048.06
LINF_170010000	2403	3	3213.67	4	3105.75
LINF_170010100	828	23	1350.39	36	1371.03
LINF_170010300	3174	3	3458.67	15	3558.53
[truncated: 5,729 more rows]

## Sheet: Table S4 SL context
TriTrypDB Gene ID	Chromosome	Strand	Number of FL reads	Primary SL site position	% of reads with the primary SL site	SL addition site (XX|X)	Start CDS position	5'UTR length (nt)	5'UTR length (nt) based on PRED-A-TERM	Distance between the primary SL site and all other SL sites (nt)	Region of 100 nt downstream the SL site	GC content 100 nt downstream (%)	CT content 100 nt downstream (%)	Ordered bases 100 nt downstream			GC content (%)	CT content (%)	Average distance
LINF_010005100	LinJ.01	-	30	7614	23.3333	CCC	7438	176	189	9.65217	LINF_010005100.LinJ.01:7615-7714	63	74	C(45) > T(29) > G(18) > A(8)		Median	56	68	22.1334
LINF_010005300	LinJ.01	-	217	12876	20.7373	GGG	12601	275	93	29.2791	LINF_010005300.LinJ.01:12877-12976	65	53	C(37) > G(28) > A(19) > T(16)		Mean	55.4562	67.8625	56.8804
LINF_010005500	LinJ.01	-	21	19083	42.8571	CTC	18859	224	228	12.0833	LINF_010005500.LinJ.01:19084-19183	63	68	C(41) > T(27) > G(22) > A(10)
LINF_010005600	LinJ.01	-	16	22021	68.75	CAG	21689	332	330	24.4	LINF_010005600.LinJ.01:22022-22121	68	79	C(53) > T(26) > G(15) > A(6)
LINF_010005700	LinJ.01	-	80	23375	63.75	CAG	23242	133	ND	17.5517	LINF_010005700.LinJ.01:23376-23475	58	62	C(44) > A(24) > T(18) > G(14)
LINF_010005800	LinJ.01	-	28	25668	82.1429	TAG	25617	51	49	6	LINF_010005800.LinJ.01:25669-25768	54	66	C(37) > T(29) > A(17) > G(17)
LINF_010005900	LinJ.01	-	40	27697	62.5	CAG	27269	428	426	84.7333	LINF_010005900.LinJ.01:27698-27797	62	75	C(41) > T(34) > G(21) > A(4)
LINF_010006000	LinJ.01	-	191	29250	53.9267	AAG	28956	294	294	10.5568	LINF_010006000.LinJ.01:29251-29350	63	61	C(44) > A(20) > G(19) > T(17)
LINF_010006100	LinJ.01	-	35	32441	54.2857	CAG	32133	308	306	39.375	LINF_010006100.LinJ.01:32442-32541	57	69	C(37) > T(32) > G(20) > A(11)
LINF_010006200	LinJ.01	-	18	34736	88.8889	TAG	34517	219	217	25	LINF_010006200.LinJ.01:34737-34836	60	70	C(40) > T(30) > G(20) > A(10)
LINF_010006400	LinJ.01	-	132	38295	62.1212	CAG	38155	140	140	12.46	LINF_010006400.LinJ.01:38296-38395	55	66	T(36) > C(30) > G(25) > A(9)
LINF_010006500	LinJ.01	-	187	39336	79.6791	AAG	39262	74	ND	11.4211	LINF_010006500.LinJ.01:39337-39436	54	68	C(42) > T(26) > A(20) > G(12)
LINF_010006700	LinJ.01	-	16	46930	50	CAG	46496	434	170	153.25	LINF_010006700.LinJ.01:46931-47030	59	70	C(42) > T(28) > G(17) > A(13)
LINF_010006800	LinJ.01	-	64	48671	65.625	TAG	48556	115	113	9.09091	LINF_010006800.LinJ.01:48672-48771	56	75	C(42) > T(33) > G(14) > A(11)
LINF_010006900	LinJ.01	-	80	50101	57.5	CAG	50050	51	49	22.5	LINF_010006900.LinJ.01:50102-50201	57	68	C(40) > T(28) > G(17) > A(15)
LINF_010007100	LinJ.01	-	16	58501	62.5	AAG	58350	151	149	302.5	LINF_010007100.LinJ.01:58502-58601	63	71	C(42) > T(29) > G(21) > A(8)
LINF_010007200	LinJ.01	-	78	62102	70.5128	TAG	61985	117	115	73.3913	LINF_010007200.LinJ.01:62103-62202	60	67	C(40) > T(27) > G(20) > A(13)
LINF_010007500	LinJ.01	-	53	71146	84.9057	CAG	71015	131	129	16.375	LINF_010007500.LinJ.01:71147-71246	63	69	C(48) > T(21) > A(16) > G(15)
LINF_010007600	LinJ.01	-	34	73226	44.1176	AAA	72698	528	328	29.3684	LINF_010007600.LinJ.01:73227-73326	60	70	C(49) > T(21) > A(19) > G(11)
LINF_010007700	LinJ.01	-	101	75689	85.1485	TAG	75418	271	269	17.6667	LINF_010007700.LinJ.01:75690-75789	55	69	C(37) > T(32) > G(18) > A(13)
LINF_010007800	LinJ.01	-	332	77341	73.494	CAG	77157	184	392	17.0795	LINF_010007800.LinJ.01:77342-77441	56	59	C(32) > T(27) > G(24) > A(17)
LINF_010007900	LinJ.01	-	1347	78336	57.6095	TAG	78247	89	87	6.07005	LINF_010007900.LinJ.01:78337-78436	51	65	C(38) > T(27) > A(22) > G(13)
LINF_010008000	LinJ.01	-	140	79989	44.2857	TAG	79980	9	7	6	LINF_010008000.LinJ.01:79990-80089	48	55	C(30) > A(27) > T(25) > G(18)
LINF_010008100	LinJ.01	-	31	80805	45.1613	AAG	80771	34	ND	13.9412	LINF_010008100.LinJ.01:80806-80905	46	66	C(34) > T(32) > A(22) > G(12)
LINF_010008200	LinJ.01	+	59	81551	83.0508	CAG	81741	190	188	10.5	LINF_010008200.LinJ.01:81452-81551	50	66	C(35) > T(31) > A(19) > G(15)
LINF_010008400	LinJ.01	+	128	84202	44.5312	GAA	84325	123	111	11.8028	LINF_010008400.LinJ.01:84103-84202	52	74	T(41) > C(33) > G(19) > A(7)
LINF_010008500	LinJ.01	+	126	85526	65.873	CAG	85705	179	177	48.6977	LINF_010008500.LinJ.01:85427-85526	50	68	C(35) > T(33) > A(17) > G(15)
LINF_010008700	LinJ.01	+	651	91154	67.8955	AAG	91224	70	68	8.67464	LINF_010008700.LinJ.01:91055-91154	56	68	C(42) > T(26) > A(18) > G(14)
LINF_010008800	LinJ.01	+	71	92353	69.0141	TAG	92426	73	71	12.3636	LINF_010008800.LinJ.01:92254-92353	62	74	C(41) > T(33) > G(21) > A(5)
LINF_010009000	LinJ.01	+	8	97159	87.5	CAG	97206	47	45	11	LINF_010009000.LinJ.01:97060-97159	56	61	C(34) > T(27) > G(22) > A(17)
LINF_010009200	LinJ.01	+	1244	102839	70.2572	AAG	102868	29	27	11.2108	LINF_010009200.LinJ.01:102740-102839	54	62	C(40) > A(24) > T(22) > G(14)
LINF_010009300	LinJ.01	+	3066	104632	31.6047	AAG	104660	28	26	6.36242	LINF_010009300.LinJ.01:104533-104632	59	63	C(44) > A(22) > T(19) > G(15)
LINF_010009400	LinJ.01	+	18	105990	44.4444	AAG	106134	144	162	16.5	LINF_010009400.LinJ.01:105891-105990	66	72	C(49) > T(23) > G(17) > A(11)
LINF_010009600	LinJ.01	+	92	114144	55.4348	CAG	114424	280	278	39.878	LINF_010009600.LinJ.01:114045-114144	57	69	C(44) > T(25) > A(18) > G(13)
LINF_010009900	LinJ.01	+	53	128633	33.9623	TAG	128823	190	7	53.5429	LINF_010009900.LinJ.01:128534-128633	60	79	C(50) > T(29) > A(11) > G(10)
LINF_010010000	LinJ.01	+	10	131147	60	CAG	131641	494	15	7	LINF_010010000.LinJ.01:131048-131147	66	71	C(49) > T(22) > G(17) > A(12)
LINF_010010200	LinJ.01	+	142	139823	64.0845	CAG	140316	493	320	15.6667	LINF_010010200.LinJ.01:139724-139823	62	74	C(43) > T(31) > G(19) > A(7)
LINF_010010600	LinJ.01	+	80	156519	66.25	CAG	156610	91	89	7.62963	LINF_010010600.LinJ.01:156420-156519	62	72	C(48) > T(24) > A(14) > G(14)
LINF_010010700	LinJ.01	+	28	158651	46.4286	AAG	158783	132	130	19.6667	LINF_010010700.LinJ.01:158552-158651	61	71	C(49) > T(22) > A(17) > G(12)
LINF_010011200	LinJ.01	+	128	175104	82.8125	CAG	175625	521	35	10.8182	LINF_010011200.LinJ.01:175005-175104	66	62	C(43) > G(23) > T(19) > A(15)
LINF_010011400	LinJ.01	+	6	179902	66.6667	CAG	181105	1203	165	5.5	LINF_010011400.LinJ.01:179803-179902	60	64	C(46) > A(22) > T(18) > G(14)
LINF_010011600	LinJ.01	+	69	188910	49.2754	CAG	189091	181	185	6.65714	LINF_010011600.LinJ.01:188811-188910	58	70	C(44) > T(26) > A(16) > G(14)
LINF_010012000	LinJ.01	+	67	206645	31.3433	CAG	206794	149	147	65.587	LINF_010012000.LinJ.01:206546-206645	62	55	C(35) > G(27) > T(20) > A(18)
LINF_010012100	LinJ.01	+	18	209731	83.3333	CAG	210432	701	ND	15.3333	LINF_010012100.LinJ.01:209632-209731	59	69	C(44) > T(25) > A(16) > G(15)
LINF_010012700	LinJ.01	+	111	238273	54.0541	CAG	238289	16	44	23.4314	LINF_010012700.LinJ.01:238174-238273	63	69	C(46) > T(23) > G(17) > A(14)
LINF_010012800	LinJ.01	+	54	240057	81.4815	CAG	240165	108	106	6.2	LINF_010012800.LinJ.01:239958-240057	62	67	C(39) > T(28) > G(23) > A(10)
LINF_010012900	LinJ.01	+	9	243344	44.4444	CAG	243452	108	106	8.6	LINF_010012900.LinJ.01:243245-243344	62	67	C(39) > T(28) > G(23) > A(10)
LINF_010013000	LinJ.01	+	38	246570	44.7368	CAG	246809	239	270	37	LINF_010013000.LinJ.01:246471-246570	61	67	C(38) > T(29) > G(23) > A(10)
LINF_010013100	LinJ.01	+	120	250431	73.3333	AAG	250512	81	79	91.2188	LINF_010013100.LinJ.01:250332-250431	57	68	C(45) > T(23) > A(20) > G(12)
LINF_020005100	LinJ.02	-	266	8132	83.8346	AAG	8053	79	77	15.1395	LINF_020005100.LinJ.02:8133-8232	53	65	C(40) > T(25) > A(22) > G(13)
LINF_020005300	LinJ.02	-	37	12690	40.5405	AAG	12538	152	150	352.227	LINF_020005300.LinJ.02:12691-12790	60	73	C(47) > T(26) > A(14) > G(13)
LINF_020005400	LinJ.02	-	48	18431	45.8333	CAG	18203	228	226	9.88462	LINF_020005400.LinJ.02:18432-18531	66	76	C(53) > T(23) > G(13) > A(11)
LINF_020005500	LinJ.02	-	93	19614	81.7204	CAG	19428	186	7	16.4118	LINF_020005500.LinJ.02:19615-19714	54	72	C(41) > T(31) > A(15) > G(13)
LINF_020005600	LinJ.02	-	71	21342	49.2958	CAG	21237	105	108	155.528	LINF_020005600.LinJ.02:21343-21442	60	56	G(30) > C(30) > T(26) > A(14)
LINF_020005700	LinJ.02	-	16	26817	31.25	GAG	26301	516	421	212	LINF_020005700.LinJ.02:26818-26917	51	69	T(38) > C(31) > G(20) > A(11)
LINF_020005800	LinJ.02	-	54	28841	31.4815	AAG	28839	2	13	109.568	LINF_020005800.LinJ.02:28842-28941	55	69	C(39) > T(30) > G(16) > A(15)
LINF_020005900	LinJ.02	-	41	31418	46.3415	CAG	31213	205	203	320.682	LINF_020005900.LinJ.02:31419-31518	57	55	C(32) > G(25) > T(23) > A(20)
LINF_020006300	LinJ.02	-	196	61242	41.3265	CAG	61223	19	17	6.44348	LINF_020006300.LinJ.02:61243-61342	60	70	C(45) > T(25) > A(15) > G(15)
LINF_020007600	LinJ.02	-	46	130259	69.5652	AAG	129739	520	414	43.7857	LINF_020007600.LinJ.02:130260-130359	56	68	C(39) > T(29) > G(17) > A(15)
LINF_020007700	LinJ.02	-	53	132130	37.7358	AAG	131466	664	ND	42.2424	LINF_020007700.LinJ.02:132131-132230	60	63	C(36) > T(27) > G(24) > A(13)
LINF_020007800	LinJ.02	-	60	134403	55	CAG	134053	350	348	16.8519	LINF_020007800.LinJ.02:134404-134503	65	62	C(40) > G(25) > T(22) > A(13)
LINF_020007900	LinJ.02	-	29	136910	51.7241	CAG	136529	381	379	4.42857	LINF_020007900.LinJ.02:136911-137010	57	67	C(46) > A(22) > T(21) > G(11)
LINF_020008100	LinJ.02	-	23	155426	39.1304	AAG	155130	296	294	93.7857	LINF_020008100.LinJ.02:155427-155526	57	82	C(48) > T(34) > A(9) > G(9)
LINF_020008600	LinJ.02	-	25	174077	80	CAG	173955	122	120	61	LINF_020008600.LinJ.02:174078-174177	64	72	C(48) > T(24) > G(16) > A(12)
LINF_020008800	LinJ.02	-	51	179744	43.1373	TAG	179561	183	181	13.9655	LINF_020008800.LinJ.02:179745-179844	63	68	C(38) > T(30) > G(25) > A(7)
LINF_020009300	LinJ.02	-	96	196594	57.2917	CAG	196565	29	58	166.122	LINF_020009300.LinJ.02:196595-196694	66	66	C(45) > T(21) > G(21) > A(13)
LINF_020009700	LinJ.02	-	44	203692	86.3636	AAG	203592	100	ND	19.1667	LINF_020009700.LinJ.02:203693-203792	53	55	C(38) > A(30) > T(17) > G(15)
LINF_020010000	LinJ.02	-	29	222955	68.9655	CAG	222850	105	103	26.2222	LINF_020010000.LinJ.02:222956-223055	60	59	C(33) > G(27) > T(26) > A(14)
LINF_020010300	LinJ.02	-	77	232505	46.7532	AAG	232504	1	11	141.683	LINF_020010300.LinJ.02:232506-232605	44	66	T(34) > C(32) > A(22) > G(12)
LINF_020010700	LinJ.02	-	14	252725	35.7143	CAG	251669	1056	63	103.667	LINF_020010700.LinJ.02:252726-252825	40	54	T(31) > A(29) > C(23) > G(17)
LINF_020010800	LinJ.02	-	67	254797	50.7463	AAG	254527	270	268	28.0606	LINF_020010800.LinJ.02:254798-254897	54	66	C(42) > T(24) > A(22) > G(12)
LINF_020010900	LinJ.02	-	23	258398	78.2609	AAG	258170	228	226	8.2	LINF_020010900.LinJ.02:258399-258498	55	69	C(36) > T(33) > G(19) > A(12)
LINF_020011300	LinJ.02	+	19	312892	47.3684	AAG	312988	96	94	46.8	LINF_020011300.LinJ.02:312793-312892	64	61	C(40) > G(24) > T(21) > A(15)
LINF_020011500	LinJ.02	+	42	317235	76.1905	TAG	317349	114	112	15.6	LINF_020011500.LinJ.02:317136-317235	63	71	C(38) > T(33) > G(25) > A(4)
LINF_020011800	LinJ.02	+	41	328174	63.4146	CAG	328329	155	153	21	LINF_020011800.LinJ.02:328075-328174	63	66	C(45) > T(21) > G(18) > A(16)
LINF_020012000	LinJ.02	+	39	333677	56.4103	CAG	333812	135	133	17.8235	LINF_020012000.LinJ.02:333578-333677	63	71	C(46) > T(25) > G(17) > A(12)
LINF_020012100	LinJ.02	+	113	335964	64.6018	AAG	336793	829	ND	148.975	LINF_020012100.LinJ.02:335865-335964	51	60	C(39) > A(28) > T(21) > G(12)
LINF_020012200	LinJ.02	+	60	338160	75	TAG	338308	148	146	16.3333	LINF_020012200.LinJ.02:338061-338160	64	71	C(44) > T(27) > G(20) > A(9)
LINF_030005200	LinJ.03	+	91	6859	61.5385	CAG	7036	177	175	23.0857	LINF_030005200.LinJ.03:6760-6859	52	64	C(33) > T(31) > G(19) > A(17)
LINF_030005400	LinJ.03	+	122	13277	58.1967	AAG	13324	47	45	58.902	LINF_030005400.LinJ.03:13178-13277	51	69	C(38) > T(31) > A(18) > G(13)
LINF_030005500	LinJ.03	+	39	15186	89.7436	CAG	15347	161	159	15.25	LINF_030005500.LinJ.03:15087-15186	55	74	C(42) > T(32) > A(13) > G(13)
LINF_030005600	LinJ.03	+	50	18153	32	CAG	18578	425	423	37.5294	LINF_030005600.LinJ.03:18054-18153	57	73	C(40) > T(33) > G(17) > A(10)
LINF_030005800	LinJ.03	+	142	24581	56.338	AAG	24882	301	299	6.96774	LINF_030005800.LinJ.03:24482-24581	60	74	C(45) > T(29) > G(15) > A(11)
LINF_030006000	LinJ.03	+	10	29872	60	TAG	30102	230	228	14.75	LINF_030006000.LinJ.03:29773-29872	56	68	C(39) > T(29) > G(17) > A(15)
LINF_030006100	LinJ.03	+	201	33705	26.3682	CAG	33825	120	37	49.9797	LINF_030006100.LinJ.03:33606-33705	61	63	C(40) > T(23) > G(21) > A(16)
LINF_030006200	LinJ.03	+	139	35161	80.5755	CAG	35249	88	86	22.9259	LINF_030006200.LinJ.03:35062-35161	69	72	C(45) > T(27) > G(24) > A(4)
LINF_030006300	LinJ.03	+	94	36796	69.1489	CAG	36906	110	108	10.0345	LINF_030006300.LinJ.03:36697-36796	62	71	C(45) > T(26) > G(17) > A(12)
LINF_030006400	LinJ.03	+	15	38555	66.6667	CAG	38711	156	154	21	LINF_030006400.LinJ.03:38456-38555	57	66	C(41) > T(25) > A(18) > G(16)
LINF_030006500	LinJ.03	+	171	41796	78.3626	TAG	41874	78	249	16.1351	LINF_030006500.LinJ.03:41697-41796	58	57	C(39) > A(24) > G(19) > T(18)
LINF_030006600	LinJ.03	+	9	42932	55.5556	CAG	43048	116	432	5.25	LINF_030006600.LinJ.03:42833-42932	58	66	C(36) > T(30) > G(22) > A(12)
LINF_030006700	LinJ.03	+	65	45570	44.6154	AAG	45824	254	257	7.83333	LINF_030006700.LinJ.03:45471-45570	58	53	C(33) > G(25) > A(22) > T(20)
LINF_030006800	LinJ.03	+	25	47846	76	AAG	47999	153	271	11.3333	LINF_030006800.LinJ.03:47747-47846	64	59	C(40) > G(24) > T(19) > A(17)
LINF_030006900	LinJ.03	+	10	51067	50	AAG	51461	394	250	41.2	LINF_030006900.LinJ.03:50968-51067	56	61	C(36) > T(25) > G(20) > A(19)
LINF_030007000	LinJ.03	+	117	53395	71.7949	CAG	53692	297	295	8.21212	LINF_030007000.LinJ.03:53296-53395	63	71	C(42) > T(29) > G(21) > A(8)
LINF_030007200	LinJ.03	+	261	60698	49.8084	CAG	60825	127	377	107.985	LINF_030007200.LinJ.03:60599-60698	65	66	C(41) > T(25) > G(24) > A(10)
LINF_030007300	LinJ.03	+	1820	61838	66.8681	CAG	61907	69	67	11.2703	LINF_030007300.LinJ.03:61739-61838	69	65	C(47) > G(22) > T(18) > A(13)
LINF_030007400	LinJ.03	+	64	63240	75	CAG	63466	226	224	38.3125	LINF_030007400.LinJ.03:63141-63240	60	74	C(49) > T(25) > A(15) > G(11)
LINF_030008100	LinJ.03	+	31	96111	83.871	CAG	96441	330	328	48.4	LINF_030008100.LinJ.03:96012-96111	61	73	C(48) > T(25) > A(14) > G(13)
LINF_030008650	LinJ.03	+	21	126207	66.6667	AAG	126402	195	245	105.286	LINF_030008650.LinJ.03:126108-126207	63	73	C(48) > T(25) > G(15) > A(12)
LINF_030009000	LinJ.03	+	504	143073	40.873	CAG	143151	78	76	4.77181	LINF_030009000.LinJ.03:142974-143073	61	65	C(44) > T(21) > A(18) > G(17)
LINF_030009100	LinJ.03	+	2657	144337	81.4829	AAG	144385	48	46	9.95935	LINF_030009100.LinJ.03:144238-144337	57	69	C(44) > T(25) > A(18) > G(13)
LINF_030009400	LinJ.03	+	91	162061	49.4505	AAG	162280	219	247	26.4565	LINF_030009400.LinJ.03:161962-162061	57	65	C(42) > T(23) > A(20) > G(15)
LINF_030010500	LinJ.03	+	25	217344	52	CAG	217427	83	89	415.667	LINF_030010500.LinJ.03:217245-217344	63	69	C(43) > T(26) > G(20) > A(11)
LINF_030010600	LinJ.03	+	50	218761	28	CAG	218838	77	75	44.9722	LINF_030010600.LinJ.03:218662-218761	67	80	C(53) > T(27) > G(14) > A(6)
LINF_030010800	LinJ.03	+	66	225773	83.3333	AAG	225931	158	156	9.54545	LINF_030010800.LinJ.03:225674-225773	64	69	C(49) > T(20) > A(16) > G(15)
LINF_030010900	LinJ.03	+	92	227821	69.5652	CCT	228197	376	370	60.6071	LINF_030010900.LinJ.03:227722-227821	53	78	C(45) > T(33) > A(14) > G(8)
LINF_030011200	LinJ.03	+	195	233632	42.5641	CAG	233765	133	180	38.1875	LINF_030011200.LinJ.03:233533-233632	55	80	C(49) > T(31) > A(14) > G(6)
LINF_030011600	LinJ.03	+	24	247386	54.1667	AAG	247412	26	34	43.2727	LINF_030011600.LinJ.03:247287-247386	62	64	C(39) > T(25) > G(23) > A(13)
LINF_030011700	LinJ.03	+	23	259275	47.8261	TGG	259430	155	141	26.1667	LINF_030011700.LinJ.03:259176-259275	43	70	T(38) > C(32) > A(19) > G(11)
LINF_030012100	LinJ.03	-	126	280347	30.9524	CCA	280255	92	38	13.8046	LINF_030012100.LinJ.03:280348-280447	61	67	C(46) > T(21) > A(18) > G(15)
LINF_030012300	LinJ.03	-	16	286798	56.25	AAG	286782	16	ND	89.1429	LINF_030012300.LinJ.03:286799-286898	61	62	C(39) > T(23) > G(22) > A(16)
LINF_030012400	LinJ.03	-	40	288101	67.5	CAG	287947	154	61	12.8462	LINF_030012400.LinJ.03:288102-288201	60	62	C(32) > T(30) > G(28) > A(10)
LINF_030012600	LinJ.03	-	51	292806	47.0588	CAG	292607	199	76	9.96296	LINF_030012600.LinJ.03:292807-292906	58	68	C(40) > T(28) > G(18) > A(14)
LINF_030012700	LinJ.03	-	34	295156	50	AAG	295008	148	160	56.8235	LINF_030012700.LinJ.03:295157-295256	58	56	G(35) > T(33) > C(23) > A(9)
LINF_030013300	LinJ.03	-	29	333134	55.1724	CAG	332892	242	240	175.385	LINF_030013300.LinJ.03:333135-333234	69	66	C(47) > G(22) > T(19) > A(12)
LINF_030013400	LinJ.03	-	15	336620	80	CAG	336479	141	139	18.3333	LINF_030013400.LinJ.03:336621-336720	64	74	C(45) > T(29) > G(19) > A(7)
LINF_030014200	LinJ.03	-	115	374050	64.3478	CAG	373870	180	178	50.8049	LINF_030014200.LinJ.03:374051-374150	68	65	C(46) > G(22) > T(19) > A(13)
LINF_030014400	LinJ.03	-	35	378612	54.2857	CAG	378525	87	391	37.6875	LINF_030014400.LinJ.03:378613-378712	65	63	C(41) > G(24) > T(22) > A(13)
LINF_030014500	LinJ.03	-	96	380342	47.9167	CAG	380108	234	234	16.26	LINF_030014500.LinJ.03:380343-380442	57	66	C(37) > T(29) > G(20) > A(14)
LINF_030014600	LinJ.03	-	18	383556	50	TAG	383501	55	53	9.77778	LINF_030014600.LinJ.03:383557-383656	49	68	T(40) > C(28) > G(21) > A(11)
LINF_030014700	LinJ.03	-	1716	384510	66.3753	CAG	384443	67	415	5.89428	LINF_030014700.LinJ.03:384511-384610	48	62	T(38) > G(24) > C(24) > A(14)
LINF_030014800	LinJ.03	-	51	386020	62.7451	AAG	385964	56	54	11.4211	LINF_030014800.LinJ.03:386021-386120	49	76	T(44) > C(32) > G(17) > A(7)
LINF_030014900	LinJ.03	-	75	387970	72	AAG	387940	30	ND	7.2381	LINF_030014900.LinJ.03:387971-388070	46	72	T(44) > C(28) > G(18) > A(10)
LINF_040005000	LinJ.04	+	14	4059	85.7143	CAG	4158	99	ND	39	LINF_040005000.LinJ.04:3960-4059	37	65	T(41) > C(24) > A(22) > G(13)
LINF_040005200	LinJ.04	+	17	12057	52.9412	CAG	12245	188	186	9.25	LINF_040005200.LinJ.04:11958-12057	44	73	T(45) > C(28) > G(16) > A(11)
LINF_040005300	LinJ.04	+	1588	15284	68.136	CAG	15411	127	125	51.7194	LINF_040005300.LinJ.04:15185-15284	49	69	T(37) > C(32) > G(17) > A(14)
LINF_040005400	LinJ.04	+	13	16022	100	CAG	16136	114	112	ND	LINF_040005400.LinJ.04:15923-16022	48	70	T(38) > C(32) > G(16) > A(14)
LINF_040005500	LinJ.04	+	537	21401	55.8659	CAG	21489	88	88	10.7131	LINF_040005500.LinJ.04:21302-21401	57	76	C(42) > T(34) > G(15) > A(9)
LINF_040005700	LinJ.04	+	70	26622	70	CAG	26834	212	210	21.4762	LINF_040005700.LinJ.04:26523-26622	47	71	T(38) > C(33) > A(15) > G(14)
LINF_040005800	LinJ.04	+	150	28522	34	CAG	28562	40	405	112.04	LINF_040005800.LinJ.04:28423-28522	58	59	C(35) > T(24) > G(23) > A(18)
LINF_040005900	LinJ.04	+	598	29982	93.4783	AAG	29986	4	2	2.87179	LINF_040005900.LinJ.04:29883-29982	62	78	C(46) > T(32) > G(16) > A(6)
LINF_040006100	LinJ.04	+	40	38143	57.5	CAG	38331	188	253	40.7059	LINF_040006100.LinJ.04:38044-38143	59	66	C(36) > T(30) > G(23) > A(11)
LINF_040006200	LinJ.04	+	78	40868	64.1026	CAG	41166	298	411	186.893	LINF_040006200.LinJ.04:40769-40868	59	59	C(30) > T(29) > G(29) > A(12)
LINF_040006300	LinJ.04	+	165	42835	66.0606	CAG	42964	129	164	23.6071	LINF_040006300.LinJ.04:42736-42835	62	74	C(45) > T(29) > G(17) > A(9)
LINF_040006400	LinJ.04	+	157	44533	28.0255	CAG	44830	297	119	124.46	LINF_040006400.LinJ.04:44434-44533	63	70	C(43) > T(27) > G(20) > A(10)
LINF_040006700	LinJ.04	+	12	50574	66.6667	CAG	50666	92	90	8.25	LINF_040006700.LinJ.04:50475-50574	75	72	C(60) > G(15) > A(13) > T(12)
LINF_040007100	LinJ.04	+	13	62431	38.4615	AAG	62565	134	169	49.375	LINF_040007100.LinJ.04:62332-62431	57	46	G(41) > T(30) > C(16) > A(13)
LINF_040007300	LinJ.04	+	8	68657	50	CAG	69036	379	16	17.75	LINF_040007300.LinJ.04:68558-68657	59	53	C(30) > G(29) > T(23) > A(18)
LINF_040007400	LinJ.04	+	62	71801	69.3548	AAG	71892	91	89	36.2105	LINF_040007400.LinJ.04:71702-71801	59	68	C(50) > A(23) > T(18) > G(9)
LINF_040007500	LinJ.04	+	39	73835	51.2821	CAG	74044	209	207	193.579	LINF_040007500.LinJ.04:73736-73835	68	83	C(57) > T(26) > G(11) > A(6)
LINF_040007700	LinJ.04	+	49	81826	59.1837	CAG	81999	173	171	23.85	LINF_040007700.LinJ.04:81727-81826	64	71	C(46) > T(25) > G(18) > A(11)
LINF_040007800	LinJ.04	+	51	83277	45.098	AAG	83450	173	171	5.17857	LINF_040007800.LinJ.04:83178-83277	58	73	C(48) > T(25) > A(17) > G(10)
LINF_040008000	LinJ.04	+	50	92331	46	CAG	92763	432	63	294.593	LINF_040008000.LinJ.04:92232-92331	53	71	C(38) > T(33) > G(15) > A(14)
LINF_040008100	LinJ.04	+	86	95143	76.7442	CAG	95532	389	387	11.7	LINF_040008100.LinJ.04:95044-95143	59	65	C(39) > T(26) > G(20) > A(15)
LINF_040008300	LinJ.04	+	21	100498	71.4286	AAG	100760	262	262	30.5	LINF_040008300.LinJ.04:100399-100498	67	63	C(50) > A(20) > G(17) > T(13)
LINF_040008400	LinJ.04	+	19	103108	47.3684	CAG	103162	54	5	9.8	LINF_040008400.LinJ.04:103009-103108	65	66	C(48) > T(18) > A(17) > G(17)
LINF_040008500	LinJ.04	+	356	106320	50.5618	TAG	106360	40	38	34.0114	LINF_040008500.LinJ.04:106221-106320	55	61	C(33) > T(28) > G(22) > A(17)
LINF_040008800	LinJ.04	+	122	117643	47.541	CAG	117912	269	267	73.7656	LINF_040008800.LinJ.04:117544-117643	58	67	C(36) > T(31) > G(22) > A(11)
LINF_040008900	LinJ.04	-	33	129186	57.5758	CAG	128984	202	200	17.3571	LINF_040008900.LinJ.04:129187-129286	60	67	C(42) > T(25) > G(18) > A(15)
LINF_040009200	LinJ.04	-	30	142428	83.3333	AAG	142100	328	5	13	LINF_040009200.LinJ.04:142429-142528	59	65	C(46) > A(22) > T(19) > G(13)
LINF_040009600	LinJ.04	-	76	175629	77.6316	CAG	175584	45	43	23.8824	LINF_040009600.LinJ.04:175630-175729	57	75	C(44) > T(31) > G(13) > A(12)
LINF_040009700	LinJ.04	-	1841	181026	60.2933	CAG	180962	64	62	4.36799	LINF_040009700.LinJ.04:181027-181126	58	61	C(43) > A(24) > T(18) > G(15)
LINF_040009800	LinJ.04	-	53	182986	77.3585	CAG	182149	837	4	46.6667	LINF_040009800.LinJ.04:182987-183086	61	63	C(36) > T(27) > G(25) > A(12)
LINF_040009900	LinJ.04	-	14	184966	92.8571	CAG	184796	170	168	18	LINF_040009900.LinJ.04:184967-185066	64	73	C(50) > T(23) > G(14) > A(13)
LINF_040010300	LinJ.04	-	16	210474	81.25	CAG	210374	100	185	982.667	LINF_040010300.LinJ.04:210475-210574	69	66	C(47) > G(22) > T(19) > A(12)
LINF_040010400	LinJ.04	-	11	215113	63.6364	TAG	214807	306	304	12.75	LINF_040010400.LinJ.04:215114-215213	58	68	C(39) > T(29) > G(19) > A(13)
LINF_040010600	LinJ.04	-	86	228426	74.4186	CAG	228294	132	132	14.6818	LINF_040010600.LinJ.04:228427-228526	65	70	C(47) > T(23) > G(18) > A(12)
LINF_040010800	LinJ.04	-	89	236546	46.0674	CAG	236437	109	285	66.9375	LINF_040010800.LinJ.04:236547-236646	61	57	C(38) > G(23) > A(20) > T(19)
LINF_040010900	LinJ.04	-	28	238058	32.1429	AAG	237981	77	75	16.4737	LINF_040010900.LinJ.04:238059-238158	63	56	C(36) > G(27) > T(20) > A(17)
LINF_040011300	LinJ.04	-	86	259561	29.0698	ATT	259455	106	421	42.459	LINF_040011300.LinJ.04:259562-259661	39	63	T(38) > C(25) > A(23) > G(14)
LINF_040011400	LinJ.04	-	1172	260824	72.1843	CAG	260738	86	84	13.8282	LINF_040011400.LinJ.04:260825-260924	50	70	C(39) > T(31) > A(19) > G(11)
LINF_040011700	LinJ.04	-	206	270483	43.6893	TAG	269982	501	174	12.6552	LINF_040011700.LinJ.04:270484-270583	54	69	C(36) > T(33) > G(18) > A(13)
LINF_040011900	LinJ.04	-	43	274397	58.1395	TAG	273766	631	11	231.056	LINF_040011900.LinJ.04:274398-274497	64	70	C(50) > T(20) > A(16) > G(14)
LINF_040012000	LinJ.04	-	9	278183	77.7778	CAG	277896	287	285	4.5	LINF_040012000.LinJ.04:278184-278283	58	52	C(30) > G(28) > T(22) > A(20)
LINF_040012400	LinJ.04	-	22	294730	59.0909	AAG	294571	159	157	81.1111	LINF_040012400.LinJ.04:294731-294830	66	74	C(50) > T(24) > G(16) > A(10)
LINF_040012600	LinJ.04	-	1229	299383	67.2905	CAG	299284	99	97	5.58706	LINF_040012600.LinJ.04:299384-299483	59	65	C(54) > A(30) > T(11) > G(5)
LINF_040012800	LinJ.04	-	420	302794	70	CAG	302709	85	83	20.9524	LINF_040012800.LinJ.04:302795-302894	60	72	C(46) > T(26) > A(14) > G(14)
LINF_040012900	LinJ.04	-	49	305366	53.0612	TAG	305129	237	ND	58.6087	LINF_040012900.LinJ.04:305367-305466	59	63	C(35) > T(28) > G(24) > A(13)
LINF_040013200	LinJ.04	-	107	317664	88.785	CAG	317462	202	ND	6.66667	LINF_040013200.LinJ.04:317665-317764	61	60	C(42) > A(21) > G(19) > T(18)
LINF_040013500	LinJ.04	-	23	329331	69.5652	CAG	329080	251	249	10.7143	LINF_040013500.LinJ.04:329332-329431	64	71	C(47) > T(24) > G(17) > A(12)
LINF_040013600	LinJ.04	-	206	330542	88.835	CAG	330504	38	36	19.0435	LINF_040013600.LinJ.04:330543-330642	59	57	C(34) > G(25) > T(23) > A(18)
LINF_040013800	LinJ.04	-	114	340433	56.1404	CAG	340296	137	141	288.66	LINF_040013800.LinJ.04:340434-340533	62	70	C(41) > T(29) > G(21) > A(9)
LINF_040014100	LinJ.04	-	146	356057	49.3151	CAG	355953	104	102	60.3243	LINF_040014100.LinJ.04:356058-356157	66	72	C(48) > T(24) > G(18) > A(10)
LINF_040014300	LinJ.04	-	81	362504	70.3704	TAG	362140	364	362	18.4583	LINF_040014300.LinJ.04:362505-362604	62	68	C(37) > T(31) > G(25) > A(7)
LINF_040014500	LinJ.04	-	1752	367764	79.9087	CAG	367695	69	67	7.25284	LINF_040014500.LinJ.04:367765-367864	59	70	C(52) > A(23) > T(18) > G(7)
LINF_040014600	LinJ.04	-	133	369294	75.188	CAG	369221	73	71	30.9394	LINF_040014600.LinJ.04:369295-369394	57	67	C(39) > T(28) > G(18) > A(15)
LINF_040014700	LinJ.04	-	30	371775	33.3333	CAG	371689	86	84	7.95	LINF_040014700.LinJ.04:371776-371875	74	75	C(59) > T(16) > G(15) > A(10)
LINF_040015000	LinJ.04	-	39	379975	76.9231	CAG	379692	283	281	14.1111	LINF_040015000.LinJ.04:379976-380075	59	70	C(40) > T(30) > G(19) > A(11)
LINF_040015200	LinJ.04	-	118	386476	43.2203	CTC	386443	33	26	437.612	LINF_040015200.LinJ.04:386477-386576	62	65	C(41) > T(24) > G(21) > A(14)
LINF_040015400	LinJ.04	-	122	388729	44.2623	CAG	388423	306	304	10.3824	LINF_040015400.LinJ.04:388730-388829	66	76	C(49) > T(27) > G(17) > A(7)
LINF_040015500	LinJ.04	-	40	390991	62.5	CAG	390918	73	71	157.4	LINF_040015500.LinJ.04:390992-391091	60	63	C(39) > T(24) > G(21) > A(16)
LINF_040015600	LinJ.04	-	130	394034	59.2308	TAG	393957	77	75	55.2264	LINF_040015600.LinJ.04:394035-394134	54	71	C(36) > T(35) > G(18) > A(11)
LINF_040015700	LinJ.04	-	123	396797	74.7967	CAG	396586	211	209	8.67742	LINF_040015700.LinJ.04:396798-396897	61	77	C(44) > T(33) > G(17) > A(6)
LINF_040015800	LinJ.04	-	245	397482	40	AAG	397445	37	49	7.46259	LINF_040015800.LinJ.04:397483-397582	64	66	C(44) > T(22) > G(20) > A(14)
LINF_040016400	LinJ.04	-	229	417774	54.1485	AAG	417446	328	326	20.2952	LINF_040016400.LinJ.04:417775-417874	66	69	C(45) > T(24) > G(21) > A(10)
LINF_040016500	LinJ.04	-	93	419432	55.914	CAG	419172	260	286	18.6829	LINF_040016500.LinJ.04:419433-419532	53	67	C(34) > T(33) > G(19) > A(14)
LINF_040016600	LinJ.04	-	371	420444	70.6199	CAG	420378	66	64	9.69725	LINF_040016600.LinJ.04:420445-420544	51	69	T(36) > C(33) > G(18) > A(13)
LINF_040016700	LinJ.04	-	8	424075	37.5	GAG	423625	450	131	115.4	LINF_040016700.LinJ.04:424076-424175	61	69	C(43) > T(26) > G(18) > A(13)
LINF_040016800	LinJ.04	-	144	426123	70.8333	CAG	425981	142	140	7.71429	LINF_040016800.LinJ.04:426124-426223	54	73	C(41) > T(32) > A(14) > G(13)
LINF_040017100	LinJ.04	-	105	448810	71.4286	CAG	448676	134	132	32.4667	LINF_040017100.LinJ.04:448811-448910	55	74	C(40) > T(34) > G(15) > A(11)
LINF_040017600	LinJ.04	-	202	462508	29.2079	TAG	462445	63	ND	10.8531	LINF_040017600.LinJ.04:462509-462608	49	68	T(37) > C(31) > G(18) > A(14)
LINF_050005100	LinJ.05	+	701	8246	64.7646	CAG	8283	37	344	62.8259	LINF_050005100.LinJ.05:8147-8246	47	66	T(38) > C(28) > G(19) > A(15)
LINF_050005200	LinJ.05	+	371	9142	85.7143	CAG	9220	78	76	18.1698	LINF_050005200.LinJ.05:9043-9142	45	72	T(39) > C(33) > A(16) > G(12)
LINF_050005300	LinJ.05	+	7	10798	71.4286	CAG	10914	116	114	2	LINF_050005300.LinJ.05:10699-10798	52	68	C(36) > T(32) > A(16) > G(16)
LINF_050005600	LinJ.05	+	193	22180	34.715	TAG	22216	36	409	28.4524	LINF_050005600.LinJ.05:22081-22180	53	63	C(37) > T(26) > A(21) > G(16)
LINF_050005700	LinJ.05	+	359	23289	68.2451	TAG	23370	81	79	52.5526	LINF_050005700.LinJ.05:23190-23289	57	70	C(48) > T(22) > A(21) > G(9)
LINF_050005800	LinJ.05	+	38	24764	55.2632	AAG	25296	532	ND	134.941	LINF_050005800.LinJ.05:24665-24764	51	61	C(33) > T(28) > A(21) > G(18)
LINF_050006000	LinJ.05	+	329	33068	51.6717	CAG	33206	138	69	125.792	LINF_050006000.LinJ.05:32969-33068	57	63	C(37) > T(26) > G(20) > A(17)
LINF_050006100	LinJ.05	+	117	34164	52.9915	CAG	34580	416	414	34.7636	LINF_050006100.LinJ.05:34065-34164	60	75	C(39) > T(36) > G(21) > A(4)
LINF_050006400	LinJ.05	+	30	44948	46.6667	TAG	45055	107	195	71.25	LINF_050006400.LinJ.05:44849-44948	63	51	G(32) > C(31) > T(20) > A(17)
LINF_050006800	LinJ.05	+	30	56047	33.3333	AAG	56212	165	163	41.85	LINF_050006800.LinJ.05:55948-56047	60	69	C(44) > T(25) > G(16) > A(15)
LINF_050007400	LinJ.05	+	114	84275	22.807	CTC	84329	54	99	396.25	LINF_050007400.LinJ.05:84176-84275	67	67	C(45) > T(22) > G(22) > A(11)
LINF_050007600	LinJ.05	+	22	87304	59.0909	CAG	87457	153	301	136.778	LINF_050007600.LinJ.05:87205-87304	62	60	C(38) > G(24) > T(22) > A(16)
LINF_050007700	LinJ.05	+	76	88931	55.2632	CAG	89017	86	84	8.91176	LINF_050007700.LinJ.05:88832-88931	52	66	C(38) > T(28) > A(20) > G(14)
LINF_050007800	LinJ.05	+	446	91356	62.3318	TAG	91483	127	152	104.339	LINF_050007800.LinJ.05:91257-91356	66	63	C(39) > G(27) > T(24) > A(10)
LINF_050007900	LinJ.05	+	95	93215	45.2632	CAG	93542	327	325	37.3846	LINF_050007900.LinJ.05:93116-93215	59	67	C(39) > T(28) > G(20) > A(13)
LINF_050008000	LinJ.05	+	48	95706	79.1667	AAG	95835	129	127	14.6	LINF_050008000.LinJ.05:95607-95706	60	70	C(41) > T(29) > G(19) > A(11)
LINF_050008100	LinJ.05	+	120	98434	47.5	CAG	98587	153	151	12.4762	LINF_050008100.LinJ.05:98335-98434	62	73	C(49) > T(24) > A(14) > G(13)
LINF_050008400	LinJ.05	+	60	104198	46.6667	TAG	104314	116	114	32.0938	LINF_050008400.LinJ.05:104099-104198	66	76	C(48) > T(28) > G(18) > A(6)
LINF_050008500	LinJ.05	+	133	106506	60.1504	AAG	106886	380	ND	19.3585	LINF_050008500.LinJ.05:106407-106506	62	62	C(42) > T(20) > G(20) > A(18)
LINF_050008600	LinJ.05	+	73	109208	49.3151	CGT	109316	108	102	11.2432	LINF_050008600.LinJ.05:109109-109208	66	78	C(53) > T(25) > G(13) > A(9)
LINF_050008700	LinJ.05	+	19	111805	52.6316	CAG	112005	200	198	17.8889	LINF_050008700.LinJ.05:111706-111805	62	75	C(47) > T(28) > G(15) > A(10)
LINF_050009100	LinJ.05	+	12	135196	75	CAG	135308	112	110	14.3333	LINF_050009100.LinJ.05:135097-135196	62	75	C(53) > T(22) > A(16) > G(9)
LINF_050009200	LinJ.05	+	48	138712	72.9167	AAG	139037	325	323	22.3077	LINF_050009200.LinJ.05:138613-138712	56	68	C(41) > T(27) > A(17) > G(15)
LINF_050009500	LinJ.05	+	954	148376	72.956	CAG	148497	121	119	10.2829	LINF_050009500.LinJ.05:148277-148376	58	69	C(39) > T(30) > G(19) > A(12)
LINF_050009900	LinJ.05	+	39	160224	46.1538	ATC	160374	150	145	8	LINF_050009900.LinJ.05:160125-160224	57	73	C(41) > T(32) > G(16) > A(11)
LINF_050010500	LinJ.05	+	294	181791	64.2857	CAG	181916	125	123	27.4857	LINF_050010500.LinJ.05:181692-181791	65	63	C(43) > G(22) > T(20) > A(15)
LINF_050010600	LinJ.05	+	42	183082	42.8571	CAG	183738	656	82	14.1667	LINF_050010600.LinJ.05:182983-183082	65	46	G(40) > C(25) > T(21) > A(14)
LINF_050010800	LinJ.05	+	37	189761	59.4595	CAG	189915	154	152	13.2	LINF_050010800.LinJ.05:189662-189761	56	73	C(43) > T(30) > A(14) > G(13)
LINF_050011000	LinJ.05	+	19	196979	73.6842	CAG	197132	153	151	24.8	LINF_050011000.LinJ.05:196880-196979	63	76	C(47) > T(29) > G(16) > A(8)
LINF_050011100	LinJ.05	+	11	200641	63.6364	AAG	200818	177	44	14.5	LINF_050011100.LinJ.05:200542-200641	64	64	C(48) > A(20) > T(16) > G(16)
LINF_050011700	LinJ.05	+	138	228815	55.0725	AAG	228919	104	102	14.871	LINF_050011700.LinJ.05:228716-228815	56	64	C(37) > T(27) > G(19) > A(17)
LINF_050011900	LinJ.05	+	74	240431	67.5676	CAG	240558	127	125	8.33333	LINF_050011900.LinJ.05:240332-240431	60	74	C(51) > T(23) > A(17) > G(9)
LINF_050012600	LinJ.05	+	60	277648	41.6667	TAG	277952	304	374	72.0571	LINF_050012600.LinJ.05:277549-277648	66	78	C(53) > T(25) > G(13) > A(9)
LINF_050013000	LinJ.05	+	63	295517	76.1905	CAG	295625	108	424	28.6	LINF_050013000.LinJ.05:295418-295517	54	56	C(39) > A(29) > T(17) > G(15)
LINF_050013100	LinJ.05	+	116	297886	29.3103	CAG	298257	371	89	24.2073	LINF_050013100.LinJ.05:297787-297886	56	63	C(33) > T(30) > G(23) > A(14)
LINF_050013200	LinJ.05	+	105	299931	86.6667	CAG	300033	102	406	14.5714	LINF_050013200.LinJ.05:299832-299931	59	67	C(44) > T(23) > A(18) > G(15)
LINF_050013300	LinJ.05	+	278	302140	44.6043	CAG	302170	30	46	13.5779	LINF_050013300.LinJ.05:302041-302140	55	69	C(41) > T(28) > A(17) > G(14)
LINF_050013500	LinJ.05	+	8	307461	37.5	CAG	307552	91	89	6.4	LINF_050013500.LinJ.05:307362-307461	62	71	C(47) > T(24) > G(15) > A(14)
LINF_050013800	LinJ.05	+	89	319988	80.8989	CAG	320154	166	164	26.8824	LINF_050013800.LinJ.05:319889-319988	61	68	C(48) > T(20) > A(19) > G(13)
LINF_050014000	LinJ.05	+	81	327981	67.9012	CAG	328190	209	207	15.9615	LINF_050014000.LinJ.05:327882-327981	58	72	C(45) > T(27) > A(15) > G(13)
LINF_050014200	LinJ.05	+	40	336973	30	AAG	337129	156	154	14.3929	LINF_050014200.LinJ.05:336874-336973	59	71	C(43) > T(28) > G(16) > A(13)
LINF_050014500	LinJ.05	+	28	348508	35.7143	AAG	348711	203	201	7.94444	LINF_050014500.LinJ.05:348409-348508	63	65	C(46) > T(19) > A(18) > G(17)
LINF_050014700	LinJ.05	+	17	357002	70.5882	TAG	357107	105	105	182.8	LINF_050014700.LinJ.05:356903-357002	66	77	C(54) > T(23) > G(12) > A(11)
LINF_050014800	LinJ.05	+	34	361080	61.7647	CAG	361111	31	29	71.1538	LINF_050014800.LinJ.05:360981-361080	65	73	C(54) > T(19) > A(16) > G(11)
LINF_050015100	LinJ.05	-	43	373744	46.5116	TAG	373679	65	ND	184	LINF_050015100.LinJ.05:373745-373844	63	58	C(41) > G(22) > A(20) > T(17)
LINF_050015200	LinJ.05	-	45	376943	75.5556	TAG	376529	414	452	20.8182	LINF_050015200.LinJ.05:376944-377043	57	78	C(44) > T(34) > G(13) > A(9)
LINF_050015300	LinJ.05	-	83	377628	46.988	AAG	377495	133	142	21.2727	LINF_050015300.LinJ.05:377629-377728	68	76	C(54) > T(22) > G(14) > A(10)
LINF_050015400	LinJ.05	-	30	379720	50	CAG	379605	115	113	37	LINF_050015400.LinJ.05:379721-379820	55	66	C(41) > T(25) > A(20) > G(14)
LINF_050015500	LinJ.05	-	29	382508	82.7586	AAG	382319	189	187	144	LINF_050015500.LinJ.05:382509-382608	51	75	C(41) > T(34) > A(15) > G(10)
LINF_050015700	LinJ.05	-	205	387056	52.1951	TAG	386985	71	69	13.6633	LINF_050015700.LinJ.05:387057-387156	45	68	T(35) > C(33) > A(20) > G(12)
LINF_050015800	LinJ.05	-	128	388580	75	AAG	388553	27	ND	44.2812	LINF_050015800.LinJ.05:388581-388680	48	71	C(36) > T(35) > A(17) > G(12)
LINF_050015850	LinJ.05	+	15	389933	46.6667	CAG	390005	72	70	20.875	LINF_050015850.LinJ.05:389834-389933	43	73	T(45) > C(28) > G(15) > A(12)
LINF_050015900	LinJ.05	+	29	392130	86.2069	CAG	392277	147	145	13	LINF_050015900.LinJ.05:392031-392130	44	60	T(36) > C(24) > A(20) > G(20)
LINF_050016000	LinJ.05	+	10	394403	60	GAG	394509	106	104	19.5	LINF_050016000.LinJ.05:394304-394403	52	72	T(36) > C(36) > G(16) > A(12)
LINF_050016300	LinJ.05	+	137	405927	31.3869	CAG	406190	263	261	150.117	LINF_050016300.LinJ.05:405828-405927	53	67	T(34) > C(33) > G(20) > A(13)
LINF_050016500	LinJ.05	+	101	417668	79.2079	CAG	417756	88	86	4.42857	LINF_050016500.LinJ.05:417569-417668	60	70	C(46) > T(24) > A(16) > G(14)
LINF_050016900	LinJ.05	-	70	429599	34.2857	TAG	429582	17	15	79.8478	LINF_050016900.LinJ.05:429600-429699	62	75	C(48) > T(27) > G(14) > A(11)
LINF_050017000	LinJ.05	-	59	431356	59.322	AAG	431217	139	137	22.7917	LINF_050017000.LinJ.05:431357-431456	58	59	C(39) > A(22) > T(20) > G(19)
LINF_050017100	LinJ.05	-	23	433604	39.1304	TAG	433169	435	ND	17.6429	LINF_050017100.LinJ.05:433605-433704	56	64	C(37) > T(27) > G(19) > A(17)
LINF_050017300	LinJ.05	-	258	441809	67.0543	AAG	441732	77	75	33.2353	LINF_050017300.LinJ.05:441810-441909	41	62	T(40) > C(22) > A(19) > G(19)
LINF_050017400	LinJ.05	-	36	443971	80.5556	CAG	443911	60	ND	14.7143	LINF_050017400.LinJ.05:443972-444071	50	72	T(36) > C(36) > A(14) > G(14)
LINF_050017500	LinJ.05	+	22	446134	50	CAG	446305	171	ND	19.4545	LINF_050017500.LinJ.05:446035-446134	37	68	T(42) > C(26) > A(21) > G(11)
LINF_060005000	LinJ.06	-	5658	2493	66.6667	CAG	2410	83	81	10.1575	LINF_060005000.LinJ.06:2494-2593	62	75	C(47) > T(28) > G(15) > A(10)
LINF_060005300	LinJ.06	-	49	15792	34.6939	AAG	15648	144	199	447.938	LINF_060005300.LinJ.06:15793-15892	63	72	C(46) > T(26) > G(17) > A(11)
LINF_060005500	LinJ.06	-	14	27832	57.1429	TGT	27646	186	178	117.333	LINF_060005500.LinJ.06:27833-27932	58	68	C(36) > T(32) > G(22) > A(10)
LINF_060006100	LinJ.06	-	38	46075	52.6316	AAG	45366	709	213	168.5	LINF_060006100.LinJ.06:46076-46175	61	70	C(47) > T(23) > A(16) > G(14)
LINF_060006200	LinJ.06	-	23	49184	47.8261	CAG	48787	397	395	19.9167	LINF_060006200.LinJ.06:49185-49284	54	62	C(35) > T(27) > A(19) > G(19)
LINF_060006300	LinJ.06	-	81	50924	53.0864	TAG	50702	222	21	20.8947	LINF_060006300.LinJ.06:50925-51024	62	70	C(46) > T(24) > G(16) > A(14)
LINF_060006400	LinJ.06	-	104	52533	75	AAG	52206	327	325	34.5	LINF_060006400.LinJ.06:52534-52633	60	71	C(39) > T(32) > G(21) > A(8)
LINF_060006500	LinJ.06	-	152	54704	78.2895	CAG	54484	220	218	72.6364	LINF_060006500.LinJ.06:54705-54804	57	79	C(49) > T(30) > A(13) > G(8)
LINF_060006600	LinJ.06	-	604	55675	58.6093	CAG	55646	29	27	4.18	LINF_060006600.LinJ.06:55676-55775	58	80	C(43) > T(37) > G(15) > A(5)
LINF_060006700	LinJ.06	-	51	58133	47.0588	TAG	57637	496	ND	14	LINF_060006700.LinJ.06:58134-58233	56	71	C(36) > T(35) > G(20) > A(9)
LINF_060006800	LinJ.06	-	110	59527	67.2727	CAG	59431	96	94	17.1389	LINF_060006800.LinJ.06:59528-59627	53	66	T(34) > C(32) > G(21) > A(13)
LINF_060006900	LinJ.06	-	31	62541	61.2903	CAG	61910	631	23	52.5	LINF_060006900.LinJ.06:62542-62641	67	62	C(38) > G(29) > T(24) > A(9)
LINF_060007000	LinJ.06	-	18	65884	38.8889	CAG	65254	630	401	7.54545	LINF_060007000.LinJ.06:65885-65984	51	67	T(36) > C(31) > G(20) > A(13)
LINF_060007100	LinJ.06	-	27	68823	81.4815	TAG	68634	189	187	6	LINF_060007100.LinJ.06:68824-68923	57	75	C(42) > T(33) > G(15) > A(10)
LINF_060007200	LinJ.06	-	235	69893	67.6596	CAG	69830	63	72	85.6711	LINF_060007200.LinJ.06:69894-69993	59	70	C(39) > T(31) > G(20) > A(10)
LINF_060007400	LinJ.06	-	19	73461	63.1579	AAG	73214	247	245	32	LINF_060007400.LinJ.06:73462-73561	59	70	C(50) > A(21) > T(20) > G(9)
LINF_060007500	LinJ.06	-	90	75057	33.3333	CAG	74978	79	77	8.66667	LINF_060007500.LinJ.06:75058-75157	56	63	C(37) > T(26) > G(19) > A(18)
LINF_060007800	LinJ.06	-	39	83094	66.6667	AAG	82689	405	403	45.3846	LINF_060007800.LinJ.06:83095-83194	55	71	C(36) > T(35) > G(19) > A(10)
LINF_060008000	LinJ.06	-	51	92561	82.3529	AAG	92300	261	259	11.6667	LINF_060008000.LinJ.06:92562-92661	55	63	C(40) > T(23) > A(22) > G(15)
LINF_060008200	LinJ.06	-	25	99702	64	CAG	98487	1215	ND	8.77778	LINF_060008200.LinJ.06:99703-99802	51	54	C(40) > A(35) > T(14) > G(11)
LINF_060008300	LinJ.06	-	127	101337	88.189	CAG	101284	53	227	12.3333	LINF_060008300.LinJ.06:101338-101437	52	68	C(45) > A(25) > T(23) > G(7)
LINF_060008400	LinJ.06	-	9	107302	100	CAG	107189	113	111	ND	LINF_060008400.LinJ.06:107303-107402	57	74	C(38) > T(36) > G(19) > A(7)
LINF_060008700	LinJ.06	-	18	119434	66.6667	TCT	119336	98	92	10.3333	LINF_060008700.LinJ.06:119435-119534	53	70	T(37) > C(33) > G(20) > A(10)
LINF_060008900	LinJ.06	-	62	123286	50	CAG	123253	33	ND	10.4194	LINF_060008900.LinJ.06:123287-123386	45	74	T(41) > C(33) > A(14) > G(12)
LINF_060009000	LinJ.06	+	209	129804	59.3301	AAG	129917	113	111	10.1412	LINF_060009000.LinJ.06:129705-129804	45	69	T(38) > C(31) > A(17) > G(14)
LINF_060009100	LinJ.06	+	157	131926	43.3121	TAG	131944	18	16	95.6292	LINF_060009100.LinJ.06:131827-131926	48	61	T(35) > C(26) > G(22) > A(17)
LINF_060009200	LinJ.06	+	60	133931	50	GTT	134020	89	89	7.23333	LINF_060009200.LinJ.06:133832-133931	46	69	T(41) > C(28) > G(18) > A(13)
LINF_060009300	LinJ.06	+	63	136941	65.0794	TAG	137225	284	155	62.5909	LINF_060009300.LinJ.06:136842-136941	52	71	C(39) > T(32) > A(16) > G(13)
LINF_060009400	LinJ.06	+	1809	139998	35.9315	CAG	140025	27	25	4.7981	LINF_060009400.LinJ.06:139899-139998	56	76	C(45) > T(31) > A(13) > G(11)
LINF_060009600	LinJ.06	+	1303	143386	43.1312	AAG	143443	57	55	43.3387	LINF_060009600.LinJ.06:143287-143386	48	67	C(36) > T(31) > A(21) > G(12)
LINF_060009700	LinJ.06	+	5	145202	80	AAG	146291	1089	109	1022	LINF_060009700.LinJ.06:145103-145202	54	66	C(40) > T(26) > A(20) > G(14)
LINF_060009900	LinJ.06	+	10	152661	100	CAG	152874	213	211	ND	LINF_060009900.LinJ.06:152562-152661	56	63	C(34) > T(29) > G(22) > A(15)
LINF_060010000	LinJ.06	+	67	157313	25.3731	TAG	157807	494	85	34.74	LINF_060010000.LinJ.06:157214-157313	62	74	C(48) > T(26) > G(14) > A(12)
LINF_060010400	LinJ.06	+	184	170916	61.9565	CAG	171148	232	230	13.4	LINF_060010400.LinJ.06:170817-170916	58	69	C(39) > T(30) > G(19) > A(12)
LINF_060010500	LinJ.06	+	38	172762	60.5263	TAG	173289	527	49	51.7333	LINF_060010500.LinJ.06:172663-172762	51	72	T(38) > C(34) > G(17) > A(11)
LINF_060010700	LinJ.06	+	26	178055	65.3846	TAG	178292	237	235	281.778	LINF_060010700.LinJ.06:177956-178055	58	70	T(35) > C(35) > G(23) > A(7)
LINF_060010900	LinJ.06	+	80	189076	47.5	AAG	189417	341	5	140.833	LINF_060010900.LinJ.06:188977-189076	61	65	C(41) > T(24) > G(20) > A(15)
LINF_060011000	LinJ.06	+	24	191621	75	CAG	191721	100	98	182.333	LINF_060011000.LinJ.06:191522-191621	64	74	C(51) > T(23) > A(13) > G(13)
LINF_060011200	LinJ.06	+	152	201324	36.1842	AAG	201395	71	69	7.57732	LINF_060011200.LinJ.06:201225-201324	50	72	T(37) > C(35) > G(15) > A(13)
LINF_060011300	LinJ.06	+	2885	203546	76.7071	CAG	203566	20	18	10.567	LINF_060011300.LinJ.06:203447-203546	46	70	T(36) > C(34) > A(18) > G(12)
LINF_060011400	LinJ.06	+	2227	204433	29.7261	CAG	204461	28	26	7.46645	LINF_060011400.LinJ.06:204334-204433	47	67	T(39) > C(28) > G(19) > A(14)
LINF_060011700	LinJ.06	+	36	216889	58.3333	CAG	217275	386	384	230	LINF_060011700.LinJ.06:216790-216889	58	65	C(44) > A(21) > T(21) > G(14)
LINF_060011800	LinJ.06	+	27	219822	51.8519	CAG	219922	100	138	47.7692	LINF_060011800.LinJ.06:219723-219822	55	68	T(36) > C(32) > G(23) > A(9)
LINF_060012400	LinJ.06	+	171	258787	74.269	TAG	259020	233	231	8.97727	LINF_060012400.LinJ.06:258688-258787	63	80	C(52) > T(28) > G(11) > A(9)
LINF_060012800	LinJ.06	+	43	281666	83.7209	CAG	282070	404	228	6.71429	LINF_060012800.LinJ.06:281567-281666	48	73	T(41) > C(32) > G(16) > A(11)
LINF_060013000	LinJ.06	+	17	291427	41.1765	CAG	292126	699	330	48.2	LINF_060013000.LinJ.06:291328-291427	60	68	C(41) > T(27) > G(19) > A(13)
LINF_060013200	LinJ.06	+	34	298873	76.4706	CAG	299056	183	181	11.125	LINF_060013200.LinJ.06:298774-298873	64	71	C(45) > T(26) > G(19) > A(10)
LINF_060013600	LinJ.06	+	5	334664	60	CAG	334988	324	331	78.5	LINF_060013600.LinJ.06:334565-334664	57	69	T(36) > C(33) > G(24) > A(7)
LINF_060014100	LinJ.06	+	100	366620	56	TAG	366902	282	280	30.6591	LINF_060014100.LinJ.06:366521-366620	62	63	C(42) > T(21) > G(20) > A(17)
LINF_060014500	LinJ.06	+	24	387531	66.6667	CAG	387767	236	ND	6.375	LINF_060014500.LinJ.06:387432-387531	59	68	C(45) > T(23) > A(18) > G(14)
LINF_060014800	LinJ.06	+	199	401296	52.7638	CAG	401516	220	218	237.181	LINF_060014800.LinJ.06:401197-401296	59	72	C(45) > T(27) > A(14) > G(14)
LINF_060015000	LinJ.06	+	27	406087	62.963	CAG	406276	189	187	26.2	LINF_060015000.LinJ.06:405988-406087	70	66	C(50) > G(20) > T(16) > A(14)
LINF_060015300	LinJ.06	+	63	416193	87.3016	CAG	416417	224	222	9.875	LINF_060015300.LinJ.06:416094-416193	62	75	C(47) > T(28) > G(15) > A(10)
LINF_060015700	LinJ.06	+	109	434346	34.8624	CAG	434407	61	181	26.5634	LINF_060015700.LinJ.06:434247-434346	62	71	C(42) > T(29) > G(20) > A(9)
LINF_060015800	LinJ.06	+	11	435260	45.4545	CAG	435420	160	158	8.5	LINF_060015800.LinJ.06:435161-435260	65	75	C(46) > T(29) > G(19) > A(6)
LINF_060015900	LinJ.06	+	22	437588	50	CAG	437838	250	248	25.1818	LINF_060015900.LinJ.06:437489-437588	65	69	C(42) > T(27) > G(23) > A(8)
LINF_060016000	LinJ.06	+	92	440707	46.7391	TAG	440790	83	81	9.34694	LINF_060016000.LinJ.06:440608-440707	63	77	C(50) > T(27) > G(13) > A(10)
LINF_060016200	LinJ.06	+	5	445850	80	CAG	445891	41	70	56	LINF_060016200.LinJ.06:445751-445850	65	63	C(40) > G(25) > T(23) > A(12)
LINF_060016300	LinJ.06	+	167	448986	58.0838	CAG	449096	110	3	35.7857	LINF_060016300.LinJ.06:448887-448986	64	57	C(45) > A(24) > G(19) > T(12)
LINF_060016400	LinJ.06	+	33	451469	54.5455	TAG	451619	150	148	412.067	LINF_060016400.LinJ.06:451370-451469	62	75	C(50) > T(25) > A(13) > G(12)
LINF_060016600	LinJ.06	+	34	456543	47.0588	CAG	456633	90	203	11.2222	LINF_060016600.LinJ.06:456444-456543	56	60	C(38) > A(22) > T(22) > G(18)
LINF_060016700	LinJ.06	+	14	458730	71.4286	CAG	458923	193	128	57	LINF_060016700.LinJ.06:458631-458730	59	66	C(41) > T(25) > G(18) > A(16)
LINF_060016800	LinJ.06	+	27	461638	55.5556	AAG	461850	212	33	11.5	LINF_060016800.LinJ.06:461539-461638	57	70	C(40) > T(30) > G(17) > A(13)
LINF_060017000	LinJ.06	+	114	470905	54.386	AAG	471046	141	139	17.6731	LINF_060017000.LinJ.06:470806-470905	62	71	C(46) > T(25) > G(16) > A(13)
LINF_060017300	LinJ.06	+	65	476719	69.2308	CAG	476809	90	88	18.1	LINF_060017300.LinJ.06:476620-476719	62	64	C(42) > T(22) > G(20) > A(16)
LINF_060017400	LinJ.06	+	18	478791	55.5556	TAG	478911	120	118	11.625	LINF_060017400.LinJ.06:478692-478791	64	74	C(53) > T(21) > A(15) > G(11)
LINF_060017500	LinJ.06	+	892	482758	78.0269	CAG	482854	96	94	9.34184	LINF_060017500.LinJ.06:482659-482758	56	67	C(36) > T(31) > G(20) > A(13)
LINF_060017600	LinJ.06	+	103	484172	59.2233	TAG	484389	217	215	33.3333	LINF_060017600.LinJ.06:484073-484172	54	70	T(39) > C(31) > G(23) > A(7)
LINF_060017700	LinJ.06	+	555	486681	73.8739	CAG	486744	63	166	19.4	LINF_060017700.LinJ.06:486582-486681	59	55	C(42) > A(28) > G(17) > T(13)
LINF_060018000	LinJ.06	+	14	490190	35.7143	CAG	490476	286	284	27.1111	LINF_060018000.LinJ.06:490091-490190	54	70	C(39) > T(31) > A(15) > G(15)
LINF_060018300	LinJ.06	+	90	499221	76.6667	CAG	499223	2	310	303	LINF_060018300.LinJ.06:499122-499221	54	56	C(30) > T(26) > G(24) > A(20)
LINF_060018400	LinJ.06	+	28	500605	71.4286	CAG	500718	113	111	67.25	LINF_060018400.LinJ.06:500506-500605	62	69	C(44) > T(25) > G(18) > A(13)
LINF_060018500	LinJ.06	+	518	503336	60.6178	CAG	503403	67	65	38.652	LINF_060018500.LinJ.06:503237-503336	58	75	C(41) > T(34) > G(17) > A(8)
LINF_060018600	LinJ.06	+	173	504153	68.2081	CAG	504396	243	268	16.8364	LINF_060018600.LinJ.06:504054-504153	62	75	C(45) > T(30) > G(17) > A(8)
LINF_060018700	LinJ.06	+	520	505762	76.7308	CAG	505857	95	93	11.5372	LINF_060018700.LinJ.06:505663-505762	62	76	C(46) > T(30) > G(16) > A(8)
LINF_060018800	LinJ.06	-	125	510019	64	CAG	509865	154	162	16.4222	LINF_060018800.LinJ.06:510020-510119	48	71	C(36) > T(35) > A(17) > G(12)
LINF_060018900	LinJ.06	-	233	512642	26.6094	AAG	512495	147	145	33.8889	LINF_060018900.LinJ.06:512643-512742	50	65	T(37) > C(28) > G(22) > A(13)
LINF_060019000	LinJ.06	-	95	514355	65.2632	CAG	514216	139	170	46.5152	LINF_060019000.LinJ.06:514356-514455	44	66	T(40) > C(26) > G(18) > A(16)
LINF_060019100	LinJ.06	-	38	515892	28.9474	AAG	515787	105	ND	63.4815	LINF_060019100.LinJ.06:515893-515992	49	68	T(38) > C(30) > G(19) > A(13)
LINF_060019200	LinJ.06	+	92	520421	63.0435	CAG	520563	142	142	6.52941	LINF_060019200.LinJ.06:520322-520421	46	66	C(35) > T(31) > A(23) > G(11)
LINF_070005000	LinJ.07	-	10	7053	80	CAG	6978	75	ND	6	LINF_070005000.LinJ.07:7054-7153	46	70	T(36) > C(34) > A(18) > G(12)
LINF_070005100	LinJ.07	+	276	12142	70.6522	CAG	12177	35	33	17.5062	LINF_070005100.LinJ.07:12043-12142	48	67	C(34) > T(33) > A(19) > G(14)
LINF_070005200	LinJ.07	+	66	13374	80.303	AAG	13571	197	195	17.7692	LINF_070005200.LinJ.07:13275-13374	46	64	T(35) > C(29) > A(19) > G(17)
LINF_070005300	LinJ.07	+	24	14854	20.8333	TAG	15973	1119	110	55.3158	LINF_070005300.LinJ.07:14755-14854	47	56	T(32) > C(24) > G(23) > A(21)
LINF_070005400	LinJ.07	+	15	17169	80	TAG	17264	95	93	9.66667	LINF_070005400.LinJ.07:17070-17169	44	72	T(46) > C(26) > G(18) > A(10)
LINF_070005600	LinJ.07	+	224	23284	72.7679	CAG	23452	168	362	16.5738	LINF_070005600.LinJ.07:23185-23284	60	80	C(48) > T(32) > G(12) > A(8)
LINF_070005700	LinJ.07	+	279	25288	29.7491	AGC	25313	25	59	57.551	LINF_070005700.LinJ.07:25189-25288	60	64	C(44) > A(20) > T(20) > G(16)
LINF_070005800	LinJ.07	+	11	26471	54.5455	AAG	26870	399	397	45.4	LINF_070005800.LinJ.07:26372-26471	57	81	C(47) > T(34) > G(10) > A(9)
LINF_070005900	LinJ.07	+	9	30296	100	CAG	30304	8	6	ND	LINF_070005900.LinJ.07:30197-30296	48	65	T(36) > C(29) > G(19) > A(16)
LINF_070006000	LinJ.07	+	23	36220	65.2174	CAG	36473	253	295	25.875	LINF_070006000.LinJ.07:36121-36220	61	71	C(44) > T(27) > G(17) > A(12)
LINF_070006100	LinJ.07	+	33	42276	60.6061	CAG	42618	342	351	505.385	LINF_070006100.LinJ.07:42177-42276	65	68	C(42) > T(26) > G(23) > A(9)
LINF_070006300	LinJ.07	+	11	52530	90.9091	CAG	52563	33	31	5	LINF_070006300.LinJ.07:52431-52530	54	75	C(46) > T(29) > A(17) > G(8)
LINF_070006400	LinJ.07	+	130	54821	37.6923	GAG	54954	133	137	20.7901	LINF_070006400.LinJ.07:54722-54821	60	65	C(40) > T(25) > G(20) > A(15)
LINF_070006600	LinJ.07	+	17	59002	88.2353	CAG	59731	729	241	8	LINF_070006600.LinJ.07:58903-59002	67	70	C(49) > T(21) > G(18) > A(12)
LINF_070006700	LinJ.07	-	21	65629	76.1905	CAG	65573	56	54	4.6	LINF_070006700.LinJ.07:65630-65729	69	66	C(46) > G(23) > T(20) > A(11)
LINF_070007100	LinJ.07	-	55	84780	63.6364	CAG	84626	154	152	13.05	LINF_070007100.LinJ.07:84781-84880	63	71	C(44) > T(27) > G(19) > A(10)
LINF_070007200	LinJ.07	-	20	88343	70	AAG	88091	252	250	7.83333	LINF_070007200.LinJ.07:88344-88443	49	73	C(44) > T(29) > A(22) > G(5)
LINF_070007400	LinJ.07	-	17	92481	58.8235	CAG	92247	234	235	6.57143	LINF_070007400.LinJ.07:92482-92581	63	62	C(40) > G(23) > T(22) > A(15)
LINF_070007600	LinJ.07	-	30	96015	66.6667	CAG	95761	254	97	12.4	LINF_070007600.LinJ.07:96016-96115	62	54	G(33) > C(29) > T(25) > A(13)
LINF_070007800	LinJ.07	-	82	106540	59.7561	TAG	106390	150	148	114.242	LINF_070007800.LinJ.07:106541-106640	63	65	C(39) > T(26) > G(24) > A(11)
LINF_070007900	LinJ.07	-	47	109928	85.1064	TAG	109830	98	4	29.5714	LINF_070007900.LinJ.07:109929-110028	61	60	C(37) > G(24) > T(23) > A(16)
LINF_070008100	LinJ.07	-	97	133310	37.1134	TCT	133224	86	259	32.8033	LINF_070008100.LinJ.07:133311-133410	59	64	C(39) > T(25) > G(20) > A(16)
LINF_070008300	LinJ.07	-	13	141115	53.8462	CAG	140884	231	263	5.66667	LINF_070008300.LinJ.07:141116-141215	55	68	C(37) > T(31) > G(18) > A(14)
LINF_070008600	LinJ.07	-	34	152825	32.3529	TAG	152690	135	ND	19.6957	LINF_070008600.LinJ.07:152826-152925	50	65	C(43) > A(28) > T(22) > G(7)
LINF_070008800	LinJ.07	-	15	160412	86.6667	CAG	160240	172	170	45	LINF_070008800.LinJ.07:160413-160512	66	69	C(43) > T(26) > G(23) > A(8)
LINF_070009000	LinJ.07	-	138	164694	65.942	AAG	164575	119	208	346.66	LINF_070009000.LinJ.07:164695-164794	54	56	T(32) > G(30) > C(24) > A(14)
LINF_070009600	LinJ.07	-	430	200030	86.0465	CAG	199829	201	199	10.3	LINF_070009600.LinJ.07:200031-200130	50	72	C(37) > T(35) > A(15) > G(13)
LINF_070009700	LinJ.07	-	179	201404	43.0168	CAG	201302	102	158	40.0882	LINF_070009700.LinJ.07:201405-201504	43	72	T(40) > C(32) > A(17) > G(11)
LINF_070009800	LinJ.07	-	105	202918	73.3333	CAG	202836	82	80	8.57143	LINF_070009800.LinJ.07:202919-203018	46	73	T(46) > C(27) > G(19) > A(8)
LINF_070009900	LinJ.07	-	447	203872	28.8591	AAG	203853	19	47	31.6038	LINF_070009900.LinJ.07:203873-203972	46	72	T(41) > C(31) > G(15) > A(13)
LINF_070010000	LinJ.07	-	21	206277	80.9524	AAG	206237	40	ND	16.75	LINF_070010000.LinJ.07:206278-206377	48	61	T(34) > C(27) > G(21) > A(18)
LINF_070010200	LinJ.07	+	191	216272	60.2094	TAG	216361	89	ND	244.342	LINF_070010200.LinJ.07:216173-216272	44	56	T(30) > A(26) > C(26) > G(18)
LINF_070010500	LinJ.07	+	1603	236615	62.6326	CAG	236642	27	25	7.70952	LINF_070010500.LinJ.07:236516-236615	55	73	C(37) > T(36) > G(18) > A(9)
LINF_070010600	LinJ.07	+	1142	238679	84.063	CAG	238699	20	18	38	LINF_070010600.LinJ.07:238580-238679	55	60	C(44) > A(29) > T(16) > G(11)
LINF_070010700	LinJ.07	+	37	240391	54.0541	AAG	240706	315	394	66.1176	LINF_070010700.LinJ.07:240292-240391	57	55	C(32) > G(25) > T(23) > A(20)
LINF_070011600	LinJ.07	+	72	282772	58.3333	CAG	282929	157	155	6.93333	LINF_070011600.LinJ.07:282673-282772	61	72	C(44) > T(28) > G(17) > A(11)
LINF_070011700	LinJ.07	+	280	284191	80.7143	CAG	284334	143	141	60.0185	LINF_070011700.LinJ.07:284092-284191	53	71	C(40) > T(31) > A(16) > G(13)
LINF_070012000	LinJ.07	+	129	294698	41.0853	CAG	294909	211	209	18.4474	LINF_070012000.LinJ.07:294599-294698	66	57	C(45) > A(22) > G(21) > T(12)
LINF_070012200	LinJ.07	+	30	306252	66.6667	AAG	306280	28	26	80.3	LINF_070012200.LinJ.07:306153-306252	56	70	C(42) > T(28) > A(16) > G(14)
LINF_070012300	LinJ.07	+	100	308954	54	CAG	309103	149	62	70.587	LINF_070012300.LinJ.07:308855-308954	57	58	T(32) > G(31) > C(26) > A(11)
LINF_070012400	LinJ.07	+	1231	310667	71.3241	CAG	310723	56	56	9.29745	LINF_070012400.LinJ.07:310568-310667	65	64	C(45) > G(20) > T(19) > A(16)
LINF_070012600	LinJ.07	+	22	320730	40.9091	AAG	320808	78	76	146.923	LINF_070012600.LinJ.07:320631-320730	58	77	C(42) > T(35) > G(16) > A(7)
LINF_070012700	LinJ.07	+	91	324312	45.0549	AAG	324492	180	58	40.28	LINF_070012700.LinJ.07:324213-324312	56	54	C(30) > G(26) > T(24) > A(20)
LINF_070012900	LinJ.07	+	10	330071	60	TAG	330325	254	254	7.75	LINF_070012900.LinJ.07:329972-330071	52	73	C(37) > T(36) > G(15) > A(12)
LINF_070013200	LinJ.07	+	45	353276	46.6667	AAG	353605	329	329	153.25	LINF_070013200.LinJ.07:353177-353276	54	64	C(41) > A(23) > T(23) > G(13)
LINF_070013400	LinJ.07	+	77	361313	57.1429	AAG	361918	605	370	221.909	LINF_070013400.LinJ.07:361214-361313	67	54	C(40) > G(27) > A(19) > T(14)
LINF_070013700	LinJ.07	+	32	375508	53.125	TAG	376565	1057	411	22.2667	LINF_070013700.LinJ.07:375409-375508	57	75	C(43) > T(32) > G(14) > A(11)
LINF_070013800	LinJ.07	+	33	378188	81.8182	CAG	378331	143	328	4.33333	LINF_070013800.LinJ.07:378089-378188	53	62	C(45) > A(30) > T(17) > G(8)
LINF_070014100	LinJ.07	+	24	386116	70.8333	GAA	386146	30	21	11.2857	LINF_070014100.LinJ.07:386017-386116	44	65	T(34) > C(31) > A(22) > G(13)
LINF_070014200	LinJ.07	+	28	387861	53.5714	TGT	388073	212	205	16.6154	LINF_070014200.LinJ.07:387762-387861	35	68	T(47) > C(21) > A(18) > G(14)
LINF_070014300	LinJ.07	+	159	390941	32.0755	AAG	391357	416	422	10.3611	LINF_070014300.LinJ.07:390842-390941	50	70	T(40) > C(30) > G(20) > A(10)
LINF_070014700	LinJ.07	+	219	429734	50.6849	AAG	429803	69	67	44.3611	LINF_070014700.LinJ.07:429635-429734	61	66	C(37) > T(29) > G(24) > A(10)
LINF_070015400	LinJ.07	+	72	477870	72.2222	CAG	477934	64	62	13.35	LINF_070015400.LinJ.07:477771-477870	62	70	C(43) > T(27) > G(19) > A(11)
LINF_070016100	LinJ.07	+	150	519396	56.6667	CAG	519472	76	74	44.5077	LINF_070016100.LinJ.07:519297-519396	55	71	C(40) > T(31) > G(15) > A(14)
LINF_070016400	LinJ.07	+	137	527357	72.2628	CAG	527414	57	55	22.2895	LINF_070016400.LinJ.07:527258-527357	62	71	C(40) > T(31) > G(22) > A(7)
LINF_070016600	LinJ.07	+	198	533854	21.7172	AAG	533940	86	114	70.8323	LINF_070016600.LinJ.07:533755-533854	57	66	C(38) > T(28) > G(19) > A(15)
LINF_070016700	LinJ.07	+	128	535965	15.625	TAG	536030	65	110	253.593	LINF_070016700.LinJ.07:535866-535965	55	66	C(35) > T(31) > G(20) > A(14)
LINF_070016800	LinJ.07	+	177	537571	67.2316	TAG	537618	47	356	39.3621	LINF_070016800.LinJ.07:537472-537571	67	58	C(40) > G(27) > T(18) > A(15)
LINF_070016900	LinJ.07	+	148	538916	54.7297	CAG	539418	502	375	13.7761	LINF_070016900.LinJ.07:538817-538916	71	58	C(42) > G(29) > T(16) > A(13)
[truncated: 4,114 more rows]

## Sheet: Table S5 - Alternative Poly(A)
TriTrypDB Gene ID	L. infantum transcriptome	Number of poly(A) reads	Primary poly(A) site position per gene	% poly(A) reads in the primary poly(A) window (± 75 nt)	% poly(A) reads downstream primary poly(A) window	% poly(A) reads upstream primary poly(A) window
[truncated: 29,123 more rows]

[truncated: 7 more sheets: Table S6-Stage AlternativePolyA, Table S7 - Stage-Alternative SL, Table S8 List Linf lncRNAs , Table S8-1 DE lncRNAs, Table S9 DESeq2 lncRNAs & CDSs, Table S10 lncRNAs coding, Table S11 - CRISPR-Cas9 primers]
